# Supplementary material for: Caveolin-1 protects endothelial cells from extensive expansion of transcellular tunnel by stiffening the plasma membrane
Source: eLife. 2024 Mar 22;12:RP92078. doi: 10.7554/eLife.92078 (PMC10959525; doi:10.7554/eLife.92078)
Supplement: Figure 1—figure supplement 1—source data 2. [file elife-92078-fig1-figsupp1-data2.xlsx]

## Sheet: Figure1-figure supplement1B
		siCTRL	siCTRL	siCTRL	siCAV1	siCAV1	siCAV1	siPTRF	siPTRF	siPTRF
IB: CAV1		1	1	1		0,28	0		0,83	0,44
IB: PTRF		1	1	1	0,06	0,47	0,05	0,02	0,17	0

## Sheet: Figure1-figure supplement1C
	siCTRL -	siCTRL -	siCTRL -	siCTRL +	siCTRL +	siCTRL +	siCAV1 -	siCAV1 -	siCAV1 -	siCAV1 +	siCAV1 +	siCAV1 +	siPTRF -	siPTRF -	siPTRF -	siPTRF+	siPTRF+	siPTRF+
ADPr/GAPDH	100	100	100	10	21	37	100	68	68	6	8	17	87	77	82	8	15	12
