# Supplementary material for: Caveolin-1 protects endothelial cells from extensive expansion of transcellular tunnel by stiffening the plasma membrane
Source: eLife. 2024 Mar 22;12:RP92078. doi: 10.7554/eLife.92078 (PMC10959525; doi:10.7554/eLife.92078)
Supplement: Figure 1—figure supplement 2—source data 1. [file elife-92078-fig1-figsupp2-data1.xlsx]

## Sheet: A
Cell.ID	Number.of.TEM	Experience	Condition
2	2	CAV 1	siCAV1
3	1	CAV 1	siCAV1
4	1	CAV 1	siCAV1
6	2	CAV 1	siCAV1
8	1	CAV 1	siCAV1
9	1	CAV 1	siCAV1
10	23	CAV 1	siCAV1
12	1	CAV 1	siCAV1
14	3	CAV 1	siCAV1
17	5	CAV 1	siCAV1
18	2	CAV 1	siCAV1
19	8	CAV 1	siCAV1
20	3	CAV 1	siCAV1
25	3	CAV 1	siCAV1
26	1	CAV 1	siCAV1
27	4	CAV 1	siCAV1
33	6	CAV 1	siCAV1
37	9	CAV 1	siCAV1
39	4	CAV 1	siCAV1
40	7	CAV 1	siCAV1
41	8	CAV 1	siCAV1
43	3	CAV 1	siCAV1
44	4	CAV 1	siCAV1
50	1	CAV 1	siCAV1
51	4	CAV 1	siCAV1
52	1	CAV 1	siCAV1
53	4	CAV 1	siCAV1
55	1	CAV 1	siCAV1
57	4	CAV 1	siCAV1
58	16	CAV 1	siCAV1
60	5	CAV 1	siCAV1
63	4	CAV 1	siCAV1
64	6	CAV 1	siCAV1
69	5	CAV 1	siCAV1
70	16	CAV 1	siCAV1
71	4	CAV 1	siCAV1
74	9	CAV 1	siCAV1
76	1	CAV 1	siCAV1
79	15	CAV 1	siCAV1
82	11	CAV 1	siCAV1
88	3	CAV 1	siCAV1
89	6	CAV 1	siCAV1
90	8	CAV 1	siCAV1
97	1	CAV 1	siCAV1
99	7	CAV 1	siCAV1
100	14	CAV 1	siCAV1
3	1	CAV 1	siCavin1
11	12	CAV 1	siCavin1
12	4	CAV 1	siCavin1
23	2	CAV 1	siCavin1
24	9	CAV 1	siCavin1
25	2	CAV 1	siCavin1
26	1	CAV 1	siCavin1
27	1	CAV 1	siCavin1
28	1	CAV 1	siCavin1
29	1	CAV 1	siCavin1
30	7	CAV 1	siCavin1
33	1	CAV 1	siCavin1
35	2	CAV 1	siCavin1
39	6	CAV 1	siCavin1
40	1	CAV 1	siCavin1
41	5	CAV 1	siCavin1
42	1	CAV 1	siCavin1
43	1	CAV 1	siCavin1
44	1	CAV 1	siCavin1
45	1	CAV 1	siCavin1
50	2	CAV 1	siCavin1
54	1	CAV 1	siCavin1
55	1	CAV 1	siCavin1
60	2	CAV 1	siCavin1
62	2	CAV 1	siCavin1
63	3	CAV 1	siCavin1
68	1	CAV 1	siCavin1
70	4	CAV 1	siCavin1
71	1	CAV 1	siCavin1
72	1	CAV 1	siCavin1
73	1	CAV 1	siCavin1
76	12	CAV 1	siCavin1
77	2	CAV 1	siCavin1
78	2	CAV 1	siCavin1
80	2	CAV 1	siCavin1
81	6	CAV 1	siCavin1
83	10	CAV 1	siCavin1
84	1	CAV 1	siCavin1
87	1	CAV 1	siCavin1
89	18	CAV 1	siCavin1
91	4	CAV 1	siCavin1
92	6	CAV 1	siCavin1
96	4	CAV 1	siCavin1
97	3	CAV 1	siCavin1
5	1	CAV 1	siCTRL
6	1	CAV 1	siCTRL
7	1	CAV 1	siCTRL
8	1	CAV 1	siCTRL
9	1	CAV 1	siCTRL
10	3	CAV 1	siCTRL
11	2	CAV 1	siCTRL
14	1	CAV 1	siCTRL
20	3	CAV 1	siCTRL
23	1	CAV 1	siCTRL
24	14	CAV 1	siCTRL
29	1	CAV 1	siCTRL
32	1	CAV 1	siCTRL
37	4	CAV 1	siCTRL
39	1	CAV 1	siCTRL
40	1	CAV 1	siCTRL
41	1	CAV 1	siCTRL
42	2	CAV 1	siCTRL
43	4	CAV 1	siCTRL
44	3	CAV 1	siCTRL
51	1	CAV 1	siCTRL
53	1	CAV 1	siCTRL
54	1	CAV 1	siCTRL
55	1	CAV 1	siCTRL
56	1	CAV 1	siCTRL
57	1	CAV 1	siCTRL
61	4	CAV 1	siCTRL
62	1	CAV 1	siCTRL
64	2	CAV 1	siCTRL
65	3	CAV 1	siCTRL
67	2	CAV 1	siCTRL
70	2	CAV 1	siCTRL
73	1	CAV 1	siCTRL
75	1	CAV 1	siCTRL
76	2	CAV 1	siCTRL
77	1	CAV 1	siCTRL
82	1	CAV 1	siCTRL
83	4	CAV 1	siCTRL
92	3	CAV 1	siCTRL
99	1	CAV 1	siCTRL
1	8	CAV 2	siCAV1
4	3	CAV 2	siCAV1
6	4	CAV 2	siCAV1
8	7	CAV 2	siCAV1
9	9	CAV 2	siCAV1
10	2	CAV 2	siCAV1
11	6	CAV 2	siCAV1
12	6	CAV 2	siCAV1
14	3	CAV 2	siCAV1
16	3	CAV 2	siCAV1
17	6	CAV 2	siCAV1
18	3	CAV 2	siCAV1
20	15	CAV 2	siCAV1
22	1	CAV 2	siCAV1
23	3	CAV 2	siCAV1
28	7	CAV 2	siCAV1
29	4	CAV 2	siCAV1
30	4	CAV 2	siCAV1
31	1	CAV 2	siCAV1
35	1	CAV 2	siCAV1
36	1	CAV 2	siCAV1
37	23	CAV 2	siCAV1
42	3	CAV 2	siCAV1
43	1	CAV 2	siCAV1
44	3	CAV 2	siCAV1
46	10	CAV 2	siCAV1
47	11	CAV 2	siCAV1
48	3	CAV 2	siCAV1
49	6	CAV 2	siCAV1
52	4	CAV 2	siCAV1
55	5	CAV 2	siCAV1
59	3	CAV 2	siCAV1
60	5	CAV 2	siCAV1
61	7	CAV 2	siCAV1
65	5	CAV 2	siCAV1
67	4	CAV 2	siCAV1
69	4	CAV 2	siCAV1
70	4	CAV 2	siCAV1
71	6	CAV 2	siCAV1
73	4	CAV 2	siCAV1
77	4	CAV 2	siCAV1
78	4	CAV 2	siCAV1
82	4	CAV 2	siCAV1
83	7	CAV 2	siCAV1
84	6	CAV 2	siCAV1
85	7	CAV 2	siCAV1
87	3	CAV 2	siCAV1
88	1	CAV 2	siCAV1
89	1	CAV 2	siCAV1
91	4	CAV 2	siCAV1
93	4	CAV 2	siCAV1
94	3	CAV 2	siCAV1
95	9	CAV 2	siCAV1
97	6	CAV 2	siCAV1
99	3	CAV 2	siCAV1
100	13	CAV 2	siCAV1
1	5	CAV 2	siCavin1
2	5	CAV 2	siCavin1
3	5	CAV 2	siCavin1
6	1	CAV 2	siCavin1
9	5	CAV 2	siCavin1
10	30	CAV 2	siCavin1
11	3	CAV 2	siCavin1
12	4	CAV 2	siCavin1
15	2	CAV 2	siCavin1
16	2	CAV 2	siCavin1
17	1	CAV 2	siCavin1
18	3	CAV 2	siCavin1
20	6	CAV 2	siCavin1
22	1	CAV 2	siCavin1
23	2	CAV 2	siCavin1
29	3	CAV 2	siCavin1
30	1	CAV 2	siCavin1
32	1	CAV 2	siCavin1
33	1	CAV 2	siCavin1
34	1	CAV 2	siCavin1
37	2	CAV 2	siCavin1
38	2	CAV 2	siCavin1
39	2	CAV 2	siCavin1
43	8	CAV 2	siCavin1
46	7	CAV 2	siCavin1
47	1	CAV 2	siCavin1
53	4	CAV 2	siCavin1
56	1	CAV 2	siCavin1
57	3	CAV 2	siCavin1
58	7	CAV 2	siCavin1
59	4	CAV 2	siCavin1
63	1	CAV 2	siCavin1
64	1	CAV 2	siCavin1
65	1	CAV 2	siCavin1
67	5	CAV 2	siCavin1
68	5	CAV 2	siCavin1
69	5	CAV 2	siCavin1
70	6	CAV 2	siCavin1
73	1	CAV 2	siCavin1
77	4	CAV 2	siCavin1
79	6	CAV 2	siCavin1
80	5	CAV 2	siCavin1
81	4	CAV 2	siCavin1
82	1	CAV 2	siCavin1
83	1	CAV 2	siCavin1
87	3	CAV 2	siCavin1
89	10	CAV 2	siCavin1
94	4	CAV 2	siCavin1
95	16	CAV 2	siCavin1
98	2	CAV 2	siCavin1
100	2	CAV 2	siCavin1
3	7	CAV 2	siCTRL
4	2	CAV 2	siCTRL
7	1	CAV 2	siCTRL
10	2	CAV 2	siCTRL
11	1	CAV 2	siCTRL
17	1	CAV 2	siCTRL
18	3	CAV 2	siCTRL
22	4	CAV 2	siCTRL
23	1	CAV 2	siCTRL
24	10	CAV 2	siCTRL
30	1	CAV 2	siCTRL
32	3	CAV 2	siCTRL
38	2	CAV 2	siCTRL
39	1	CAV 2	siCTRL
43	1	CAV 2	siCTRL
44	4	CAV 2	siCTRL
49	1	CAV 2	siCTRL
50	4	CAV 2	siCTRL
51	1	CAV 2	siCTRL
55	2	CAV 2	siCTRL
62	2	CAV 2	siCTRL
66	1	CAV 2	siCTRL
69	1	CAV 2	siCTRL
72	1	CAV 2	siCTRL
75	1	CAV 2	siCTRL
76	1	CAV 2	siCTRL
77	5	CAV 2	siCTRL
79	3	CAV 2	siCTRL
80	2	CAV 2	siCTRL
82	4	CAV 2	siCTRL
83	1	CAV 2	siCTRL
84	1	CAV 2	siCTRL
87	1	CAV 2	siCTRL
88	2	CAV 2	siCTRL
89	1	CAV 2	siCTRL
92	1	CAV 2	siCTRL
97	3	CAV 2	siCTRL
98	2	CAV 2	siCTRL
99	1	CAV 2	siCTRL
100	1	CAV 2	siCTRL
1	21	CAV 5	siCAV1
2	9	CAV 5	siCAV1
3	4	CAV 5	siCAV1
7	1	CAV 5	siCAV1
8	1	CAV 5	siCAV1
9	1	CAV 5	siCAV1
12	3	CAV 5	siCAV1
15	1	CAV 5	siCAV1
20	10	CAV 5	siCAV1
21	3	CAV 5	siCAV1
22	4	CAV 5	siCAV1
23	8	CAV 5	siCAV1
25	8	CAV 5	siCAV1
27	1	CAV 5	siCAV1
28	7	CAV 5	siCAV1
29	1	CAV 5	siCAV1
31	1	CAV 5	siCAV1
32	1	CAV 5	siCAV1
33	5	CAV 5	siCAV1
39	11	CAV 5	siCAV1
44	1	CAV 5	siCAV1
47	5	CAV 5	siCAV1
50	1	CAV 5	siCAV1
53	3	CAV 5	siCAV1
54	2	CAV 5	siCAV1
59	9	CAV 5	siCAV1
60	2	CAV 5	siCAV1
63	1	CAV 5	siCAV1
64	1	CAV 5	siCAV1
65	2	CAV 5	siCAV1
66	2	CAV 5	siCAV1
69	3	CAV 5	siCAV1
70	1	CAV 5	siCAV1
73	3	CAV 5	siCAV1
74	1	CAV 5	siCAV1
77	3	CAV 5	siCAV1
82	3	CAV 5	siCAV1
83	11	CAV 5	siCAV1
84	2	CAV 5	siCAV1
85	12	CAV 5	siCAV1
86	1	CAV 5	siCAV1
88	36	CAV 5	siCAV1
89	2	CAV 5	siCAV1
90	1	CAV 5	siCAV1
91	36	CAV 5	siCAV1
92	2	CAV 5	siCAV1
93	1	CAV 5	siCAV1
99	32	CAV 5	siCAV1
100	1	CAV 5	siCAV1
101	2	CAV 5	siCAV1
102	2	CAV 5	siCAV1
104	7	CAV 5	siCAV1
107	1	CAV 5	siCAV1
108	4	CAV 5	siCAV1
109	24	CAV 5	siCAV1
110	1	CAV 5	siCAV1
111	2	CAV 5	siCAV1
112	3	CAV 5	siCAV1
113	1	CAV 5	siCAV1
116	18	CAV 5	siCAV1
117	3	CAV 5	siCAV1
122	3	CAV 5	siCAV1
123	1	CAV 5	siCAV1
124	2	CAV 5	siCAV1
125	1	CAV 5	siCAV1
128	20	CAV 5	siCAV1
129	15	CAV 5	siCAV1
130	1	CAV 5	siCAV1
131	2	CAV 5	siCAV1
132	1	CAV 5	siCAV1
133	1	CAV 5	siCAV1
135	8	CAV 5	siCAV1
137	4	CAV 5	siCAV1
138	2	CAV 5	siCAV1
143	1	CAV 5	siCAV1
144	3	CAV 5	siCAV1
146	6	CAV 5	siCAV1
147	5	CAV 5	siCAV1
151	5	CAV 5	siCAV1
152	5	CAV 5	siCAV1
153	7	CAV 5	siCAV1
158	1	CAV 5	siCAV1
160	10	CAV 5	siCAV1
161	3	CAV 5	siCAV1
162	1	CAV 5	siCAV1
164	3	CAV 5	siCAV1
167	8	CAV 5	siCAV1
170	1	CAV 5	siCAV1
174	2	CAV 5	siCAV1
182	5	CAV 5	siCAV1
184	5	CAV 5	siCAV1
187	3	CAV 5	siCAV1
188	7	CAV 5	siCAV1
189	5	CAV 5	siCAV1
192	21	CAV 5	siCAV1
193	3	CAV 5	siCAV1
194	6	CAV 5	siCAV1
4	1	CAV 5	siCavin1
10	1	CAV 5	siCavin1
11	1	CAV 5	siCavin1
12	5	CAV 5	siCavin1
13	2	CAV 5	siCavin1
14	4	CAV 5	siCavin1
30	9	CAV 5	siCavin1
31	6	CAV 5	siCavin1
39	3	CAV 5	siCavin1
40	1	CAV 5	siCavin1
41	6	CAV 5	siCavin1
42	5	CAV 5	siCavin1
48	4	CAV 5	siCavin1
57	7	CAV 5	siCavin1
58	12	CAV 5	siCavin1
65	4	CAV 5	siCavin1
66	6	CAV 5	siCavin1
72	3	CAV 5	siCavin1
73	3	CAV 5	siCavin1
78	5	CAV 5	siCavin1
79	1	CAV 5	siCavin1
80	2	CAV 5	siCavin1
81	1	CAV 5	siCavin1
82	1	CAV 5	siCavin1
87	7	CAV 5	siCavin1
88	1	CAV 5	siCavin1
89	1	CAV 5	siCavin1
90	1	CAV 5	siCavin1
108	3	CAV 5	siCavin1
109	2	CAV 5	siCavin1
110	1	CAV 5	siCavin1
111	1	CAV 5	siCavin1
119	5	CAV 5	siCavin1
123	3	CAV 5	siCavin1
127	7	CAV 5	siCavin1
132	4	CAV 5	siCavin1
133	1	CAV 5	siCavin1
136	5	CAV 5	siCavin1
137	6	CAV 5	siCavin1
141	3	CAV 5	siCavin1
142	2	CAV 5	siCavin1
143	1	CAV 5	siCavin1
151	1	CAV 5	siCavin1
154	1	CAV 5	siCavin1
155	1	CAV 5	siCavin1
158	2	CAV 5	siCavin1
159	1	CAV 5	siCavin1
160	16	CAV 5	siCavin1
161	1	CAV 5	siCavin1
162	1	CAV 5	siCavin1
163	1	CAV 5	siCavin1
164	3	CAV 5	siCavin1
171	5	CAV 5	siCavin1
172	4	CAV 5	siCavin1
173	3	CAV 5	siCavin1
175	3	CAV 5	siCavin1
176	1	CAV 5	siCavin1
177	1	CAV 5	siCavin1
179	3	CAV 5	siCavin1
183	2	CAV 5	siCavin1
184	1	CAV 5	siCavin1
185	1	CAV 5	siCavin1
186	4	CAV 5	siCavin1
187	1	CAV 5	siCavin1
188	1	CAV 5	siCavin1
189	2	CAV 5	siCavin1
190	1	CAV 5	siCavin1
191	2	CAV 5	siCavin1
192	7	CAV 5	siCavin1
193	1	CAV 5	siCavin1
199	2	CAV 5	siCavin1
200	19	CAV 5	siCavin1
1	3	CAV 5	siCTRL
2	3	CAV 5	siCTRL
3	1	CAV 5	siCTRL
4	4	CAV 5	siCTRL
5	3	CAV 5	siCTRL
6	11	CAV 5	siCTRL
7	4	CAV 5	siCTRL
9	2	CAV 5	siCTRL
10	2	CAV 5	siCTRL
14	1	CAV 5	siCTRL
15	1	CAV 5	siCTRL
16	10	CAV 5	siCTRL
17	1	CAV 5	siCTRL
20	1	CAV 5	siCTRL
21	1	CAV 5	siCTRL
22	2	CAV 5	siCTRL
25	3	CAV 5	siCTRL
32	11	CAV 5	siCTRL
40	3	CAV 5	siCTRL
44	1	CAV 5	siCTRL
50	1	CAV 5	siCTRL
54	1	CAV 5	siCTRL
55	1	CAV 5	siCTRL
56	5	CAV 5	siCTRL
62	2	CAV 5	siCTRL
63	1	CAV 5	siCTRL
64	3	CAV 5	siCTRL
71	11	CAV 5	siCTRL
73	3	CAV 5	siCTRL
74	2	CAV 5	siCTRL
79	1	CAV 5	siCTRL
80	4	CAV 5	siCTRL
81	3	CAV 5	siCTRL
82	5	CAV 5	siCTRL
89	2	CAV 5	siCTRL
90	3	CAV 5	siCTRL
100	3	CAV 5	siCTRL
105	5	CAV 5	siCTRL
110	6	CAV 5	siCTRL
118	1	CAV 5	siCTRL
119	1	CAV 5	siCTRL
120	1	CAV 5	siCTRL
121	2	CAV 5	siCTRL
125	4	CAV 5	siCTRL
126	1	CAV 5	siCTRL
129	1	CAV 5	siCTRL
130	1	CAV 5	siCTRL
131	3	CAV 5	siCTRL
132	1	CAV 5	siCTRL
133	2	CAV 5	siCTRL
134	3	CAV 5	siCTRL
137	6	CAV 5	siCTRL
138	1	CAV 5	siCTRL
139	2	CAV 5	siCTRL
140	1	CAV 5	siCTRL
141	3	CAV 5	siCTRL
144	5	CAV 5	siCTRL
145	8	CAV 5	siCTRL
146	3	CAV 5	siCTRL
147	4	CAV 5	siCTRL
148	1	CAV 5	siCTRL
149	1	CAV 5	siCTRL
155	9	CAV 5	siCTRL
156	2	CAV 5	siCTRL
171	5	CAV 5	siCTRL
172	2	CAV 5	siCTRL
173	2	CAV 5	siCTRL
180	2	CAV 5	siCTRL
181	1	CAV 5	siCTRL
187	7	CAV 5	siCTRL
192	8	CAV 5	siCTRL
193	3	CAV 5	siCTRL
195	1	CAV 5	siCTRL
198	3	CAV 5	siCTRL
1	34	CAV 6	siCAV1
2	26	CAV 6	siCAV1
3	19	CAV 6	siCAV1
4	17	CAV 6	siCAV1
5	10	CAV 6	siCAV1
6	7	CAV 6	siCAV1
7	7	CAV 6	siCAV1
8	6	CAV 6	siCAV1
9	6	CAV 6	siCAV1
10	5	CAV 6	siCAV1
11	5	CAV 6	siCAV1
12	5	CAV 6	siCAV1
13	5	CAV 6	siCAV1
14	5	CAV 6	siCAV1
15	5	CAV 6	siCAV1
16	5	CAV 6	siCAV1
17	4	CAV 6	siCAV1
18	4	CAV 6	siCAV1
19	4	CAV 6	siCAV1
20	4	CAV 6	siCAV1
21	4	CAV 6	siCAV1
22	4	CAV 6	siCAV1
23	4	CAV 6	siCAV1
24	4	CAV 6	siCAV1
25	3	CAV 6	siCAV1
26	3	CAV 6	siCAV1
27	3	CAV 6	siCAV1
28	3	CAV 6	siCAV1
29	3	CAV 6	siCAV1
30	3	CAV 6	siCAV1
31	3	CAV 6	siCAV1
32	2	CAV 6	siCAV1
33	2	CAV 6	siCAV1
34	2	CAV 6	siCAV1
35	2	CAV 6	siCAV1
36	2	CAV 6	siCAV1
37	2	CAV 6	siCAV1
38	2	CAV 6	siCAV1
39	2	CAV 6	siCAV1
40	2	CAV 6	siCAV1
41	2	CAV 6	siCAV1
42	2	CAV 6	siCAV1
43	2	CAV 6	siCAV1
44	2	CAV 6	siCAV1
45	1	CAV 6	siCAV1
46	1	CAV 6	siCAV1
47	1	CAV 6	siCAV1
48	1	CAV 6	siCAV1
49	1	CAV 6	siCAV1
50	1	CAV 6	siCAV1
51	1	CAV 6	siCAV1
52	1	CAV 6	siCAV1
53	1	CAV 6	siCAV1
54	1	CAV 6	siCAV1
55	1	CAV 6	siCAV1
56	1	CAV 6	siCAV1
57	1	CAV 6	siCAV1
58	1	CAV 6	siCAV1
59	1	CAV 6	siCAV1
60	1	CAV 6	siCAV1
61	1	CAV 6	siCAV1
62	1	CAV 6	siCAV1
63	1	CAV 6	siCAV1
64	1	CAV 6	siCAV1
65	1	CAV 6	siCAV1
66	1	CAV 6	siCAV1
67	1	CAV 6	siCAV1
68	1	CAV 6	siCAV1
69	1	CAV 6	siCAV1
70	1	CAV 6	siCAV1
71	1	CAV 6	siCAV1
72	1	CAV 6	siCAV1
73	1	CAV 6	siCAV1
74	1	CAV 6	siCAV1
75	1	CAV 6	siCAV1
76	1	CAV 6	siCAV1
77	1	CAV 6	siCAV1
78	1	CAV 6	siCAV1
79	1	CAV 6	siCAV1
80	1	CAV 6	siCAV1
81	1	CAV 6	siCAV1
82	1	CAV 6	siCAV1
83	1	CAV 6	siCAV1
84	1	CAV 6	siCAV1
85	1	CAV 6	siCAV1
2	2	CAV 6	siCavin1
4	1	CAV 6	siCavin1
8	3	CAV 6	siCavin1
9	1	CAV 6	siCavin1
11	3	CAV 6	siCavin1
14	7	CAV 6	siCavin1
15	4	CAV 6	siCavin1
20	5	CAV 6	siCavin1
22	3	CAV 6	siCavin1
23	1	CAV 6	siCavin1
26	2	CAV 6	siCavin1
27	1	CAV 6	siCavin1
28	2	CAV 6	siCavin1
31	32	CAV 6	siCavin1
32	2	CAV 6	siCavin1
36	4	CAV 6	siCavin1
41	2	CAV 6	siCavin1
42	4	CAV 6	siCavin1
43	3	CAV 6	siCavin1
45	1	CAV 6	siCavin1
57	1	CAV 6	siCavin1
58	1	CAV 6	siCavin1
68	3	CAV 6	siCavin1
71	1	CAV 6	siCavin1
73	4	CAV 6	siCavin1
75	1	CAV 6	siCavin1
78	2	CAV 6	siCavin1
88	2	CAV 6	siCavin1
90	1	CAV 6	siCavin1
94	2	CAV 6	siCavin1
98	1	CAV 6	siCavin1
106	3	CAV 6	siCavin1
107	4	CAV 6	siCavin1
110	8	CAV 6	siCavin1
111	1	CAV 6	siCavin1
116	4	CAV 6	siCavin1
120	4	CAV 6	siCavin1
121	5	CAV 6	siCavin1
122	1	CAV 6	siCavin1
126	1	CAV 6	siCavin1
127	11	CAV 6	siCavin1
129	9	CAV 6	siCavin1
131	2	CAV 6	siCavin1
133	2	CAV 6	siCavin1
134	3	CAV 6	siCavin1
138	1	CAV 6	siCavin1
143	1	CAV 6	siCavin1
149	3	CAV 6	siCavin1
154	1	CAV 6	siCavin1
156	2	CAV 6	siCavin1
158	4	CAV 6	siCavin1
159	1	CAV 6	siCavin1
165	4	CAV 6	siCavin1
166	4	CAV 6	siCavin1
171	4	CAV 6	siCavin1
172	2	CAV 6	siCavin1
180	2	CAV 6	siCavin1
187	4	CAV 6	siCavin1
188	1	CAV 6	siCavin1
191	1	CAV 6	siCavin1
195	1	CAV 6	siCavin1
196	4	CAV 6	siCavin1
200	16	CAV 6	siCavin1
4	2	CAV 6	siCTRL
5	2	CAV 6	siCTRL
10	7	CAV 6	siCTRL
17	2	CAV 6	siCTRL
18	1	CAV 6	siCTRL
25	1	CAV 6	siCTRL
26	1	CAV 6	siCTRL
32	4	CAV 6	siCTRL
33	2	CAV 6	siCTRL
34	1	CAV 6	siCTRL
35	1	CAV 6	siCTRL
36	1	CAV 6	siCTRL
45	14	CAV 6	siCTRL
46	5	CAV 6	siCTRL
47	5	CAV 6	siCTRL
48	4	CAV 6	siCTRL
49	3	CAV 6	siCTRL
50	3	CAV 6	siCTRL
51	2	CAV 6	siCTRL
52	2	CAV 6	siCTRL
53	2	CAV 6	siCTRL
54	1	CAV 6	siCTRL
55	1	CAV 6	siCTRL
56	1	CAV 6	siCTRL
57	1	CAV 6	siCTRL
58	1	CAV 6	siCTRL
88	7	CAV 6	siCTRL
89	5	CAV 6	siCTRL
90	4	CAV 6	siCTRL
91	4	CAV 6	siCTRL
92	3	CAV 6	siCTRL
93	3	CAV 6	siCTRL
94	2	CAV 6	siCTRL
95	2	CAV 6	siCTRL
96	2	CAV 6	siCTRL
97	1	CAV 6	siCTRL
98	1	CAV 6	siCTRL
99	1	CAV 6	siCTRL
100	1	CAV 6	siCTRL
101	1	CAV 6	siCTRL
102	1	CAV 6	siCTRL
103	1	CAV 6	siCTRL
104	1	CAV 6	siCTRL
105	1	CAV 6	siCTRL
106	1	CAV 6	siCTRL
107	1	CAV 6	siCTRL
108	1	CAV 6	siCTRL
109	1	CAV 6	siCTRL
110	1	CAV 6	siCTRL
111	1	CAV 6	siCTRL
112	1	CAV 6	siCTRL
113	1	CAV 6	siCTRL
114	1	CAV 6	siCTRL
70	1	CAV 8	siCAV1
71	1	CAV 8	siCAV1
72	1	CAV 8	siCAV1
73	1	CAV 8	siCAV1
74	1	CAV 8	siCAV1
75	1	CAV 8	siCAV1
76	2	CAV 8	siCAV1
77	2	CAV 8	siCAV1
78	2	CAV 8	siCAV1
79	3	CAV 8	siCAV1
80	3	CAV 8	siCAV1
81	3	CAV 8	siCAV1
82	4	CAV 8	siCAV1
83	4	CAV 8	siCAV1
84	4	CAV 8	siCAV1
85	4	CAV 8	siCAV1
86	6	CAV 8	siCAV1
87	6	CAV 8	siCAV1
88	7	CAV 8	siCAV1
89	13	CAV 8	siCAV1
90	18	CAV 8	siCAV1
91	35	CAV 8	siCAV1
92	1	CAV 8	siCAV1
93	4	CAV 8	siCAV1
102	1	CAV 8	siCAV1
103	2	CAV 8	siCAV1
104	5	CAV 8	siCAV1
105	6	CAV 8	siCAV1
106	13	CAV 8	siCAV1
109	2	CAV 8	siCAV1
110	4	CAV 8	siCAV1
111	5	CAV 8	siCAV1
112	9	CAV 8	siCAV1
113	3	CAV 8	siCAV1
117	1	CAV 8	siCAV1
118	2	CAV 8	siCAV1
121	1	CAV 8	siCAV1
123	1	CAV 8	siCAV1
124	8	CAV 8	siCAV1
125	3	CAV 8	siCAV1
127	4	CAV 8	siCAV1
129	1	CAV 8	siCAV1
130	1	CAV 8	siCAV1
131	2	CAV 8	siCAV1
152	8	CAV 8	siCAV1
156	3	CAV 8	siCAV1
157	4	CAV 8	siCAV1
159	7	CAV 8	siCAV1
165	1	CAV 8	siCAV1
168	12	CAV 8	siCAV1
171	3	CAV 8	siCAV1
172	6	CAV 8	siCAV1
174	2	CAV 8	siCAV1
175	4	CAV 8	siCAV1
176	5	CAV 8	siCAV1
178	2	CAV 8	siCAV1
179	8	CAV 8	siCAV1
180	11	CAV 8	siCAV1
182	6	CAV 8	siCAV1
184	5	CAV 8	siCAV1
192	6	CAV 8	siCAV1
197	3	CAV 8	siCAV1
96	1	CAV 8	siCavin1
97	1	CAV 8	siCavin1
98	1	CAV 8	siCavin1
99	1	CAV 8	siCavin1
100	1	CAV 8	siCavin1
101	1	CAV 8	siCavin1
102	1	CAV 8	siCavin1
103	1	CAV 8	siCavin1
104	1	CAV 8	siCavin1
105	1	CAV 8	siCavin1
106	1	CAV 8	siCavin1
107	2	CAV 8	siCavin1
108	2	CAV 8	siCavin1
109	2	CAV 8	siCavin1
110	2	CAV 8	siCavin1
111	2	CAV 8	siCavin1
112	2	CAV 8	siCavin1
113	2	CAV 8	siCavin1
114	3	CAV 8	siCavin1
115	3	CAV 8	siCavin1
116	3	CAV 8	siCavin1
117	3	CAV 8	siCavin1
118	3	CAV 8	siCavin1
119	3	CAV 8	siCavin1
120	4	CAV 8	siCavin1
121	4	CAV 8	siCavin1
122	5	CAV 8	siCavin1
123	5	CAV 8	siCavin1
124	5	CAV 8	siCavin1
125	5	CAV 8	siCavin1
126	6	CAV 8	siCavin1
127	6	CAV 8	siCavin1
128	6	CAV 8	siCavin1
129	7	CAV 8	siCavin1
130	8	CAV 8	siCavin1
131	9	CAV 8	siCavin1
132	10	CAV 8	siCavin1
133	29	CAV 8	siCavin1
134	38	CAV 8	siCavin1
143	1	CAV 8	siCavin1
144	1	CAV 8	siCavin1
145	2	CAV 8	siCavin1
146	4	CAV 8	siCavin1
147	5	CAV 8	siCavin1
150	1	CAV 8	siCavin1
154	2	CAV 8	siCavin1
155	2	CAV 8	siCavin1
156	5	CAV 8	siCavin1
157	13	CAV 8	siCavin1
159	3	CAV 8	siCavin1
166	1	CAV 8	siCavin1
167	1	CAV 8	siCavin1
168	1	CAV 8	siCavin1
175	2	CAV 8	siCavin1
176	4	CAV 8	siCavin1
183	3	CAV 8	siCavin1
184	3	CAV 8	siCavin1
188	2	CAV 8	siCavin1
189	3	CAV 8	siCavin1
194	1	CAV 8	siCavin1
196	8	CAV 8	siCavin1
197	1	CAV 8	siCavin1
160	1	CAV 8	siCTRL
161	1	CAV 8	siCTRL
162	1	CAV 8	siCTRL
163	1	CAV 8	siCTRL
164	1	CAV 8	siCTRL
165	1	CAV 8	siCTRL
166	1	CAV 8	siCTRL
167	1	CAV 8	siCTRL
168	1	CAV 8	siCTRL
169	2	CAV 8	siCTRL
170	2	CAV 8	siCTRL
171	2	CAV 8	siCTRL
172	2	CAV 8	siCTRL
173	2	CAV 8	siCTRL
174	2	CAV 8	siCTRL
175	2	CAV 8	siCTRL
176	2	CAV 8	siCTRL
177	3	CAV 8	siCTRL
178	3	CAV 8	siCTRL
179	3	CAV 8	siCTRL
180	3	CAV 8	siCTRL
181	3	CAV 8	siCTRL
182	3	CAV 8	siCTRL
183	3	CAV 8	siCTRL
184	3	CAV 8	siCTRL
185	3	CAV 8	siCTRL
186	4	CAV 8	siCTRL
187	4	CAV 8	siCTRL
188	4	CAV 8	siCTRL
189	4	CAV 8	siCTRL
190	5	CAV 8	siCTRL
191	5	CAV 8	siCTRL
192	5	CAV 8	siCTRL
193	6	CAV 8	siCTRL
194	6	CAV 8	siCTRL
195	7	CAV 8	siCTRL
196	7	CAV 8	siCTRL
197	8	CAV 8	siCTRL
198	13	CAV 8	siCTRL
199	15	CAV 8	siCTRL
200	18	CAV 8	siCTRL
1	3	CAV 10	siCAV1
2	2	CAV 10	siCAV1
3	1	CAV 10	siCAV1
6	5	CAV 10	siCAV1
7	1	CAV 10	siCAV1
12	2	CAV 10	siCAV1
13	3	CAV 10	siCAV1
15	3	CAV 10	siCAV1
16	1	CAV 10	siCAV1
18	1	CAV 10	siCAV1
20	2	CAV 10	siCAV1
25	1	CAV 10	siCAV1
26	1	CAV 10	siCAV1
27	5	CAV 10	siCAV1
28	10	CAV 10	siCAV1
29	2	CAV 10	siCAV1
37	3	CAV 10	siCAV1
38	8	CAV 10	siCAV1
39	21	CAV 10	siCAV1
40	29	CAV 10	siCAV1
41	13	CAV 10	siCAV1
42	14	CAV 10	siCAV1
45	1	CAV 10	siCAV1
54	2	CAV 10	siCAV1
55	2	CAV 10	siCAV1
56	12	CAV 10	siCAV1
57	1	CAV 10	siCAV1
60	6	CAV 10	siCAV1
61	2	CAV 10	siCAV1
64	5	CAV 10	siCAV1
79	3	CAV 10	siCAV1
80	5	CAV 10	siCAV1
81	6	CAV 10	siCAV1
82	7	CAV 10	siCAV1
83	8	CAV 10	siCAV1
84	12	CAV 10	siCAV1
85	17	CAV 10	siCAV1
86	2	CAV 10	siCAV1
88	5	CAV 10	siCAV1
91	2	CAV 10	siCAV1
93	5	CAV 10	siCAV1
94	1	CAV 10	siCAV1
95	2	CAV 10	siCAV1
96	10	CAV 10	siCAV1
98	1	CAV 10	siCAV1
99	21	CAV 10	siCAV1
152	1	CAV 10	siCAV1
153	1	CAV 10	siCAV1
154	1	CAV 10	siCAV1
155	1	CAV 10	siCAV1
156	1	CAV 10	siCAV1
157	1	CAV 10	siCAV1
158	1	CAV 10	siCAV1
159	2	CAV 10	siCAV1
160	2	CAV 10	siCAV1
161	5	CAV 10	siCAV1
162	5	CAV 10	siCAV1
163	6	CAV 10	siCAV1
164	11	CAV 10	siCAV1
165	11	CAV 10	siCAV1
166	11	CAV 10	siCAV1
176	1	CAV 10	siCAV1
177	3	CAV 10	siCAV1
178	4	CAV 10	siCAV1
179	4	CAV 10	siCAV1
187	12	CAV 10	siCAV1
189	1	CAV 10	siCAV1
191	1	CAV 10	siCAV1
197	9	CAV 10	siCAV1
198	10	CAV 10	siCAV1
1	22	CAV 10	siCavin1
2	16	CAV 10	siCavin1
3	11	CAV 10	siCavin1
4	10	CAV 10	siCavin1
5	10	CAV 10	siCavin1
6	10	CAV 10	siCavin1
7	10	CAV 10	siCavin1
8	10	CAV 10	siCavin1
9	9	CAV 10	siCavin1
10	8	CAV 10	siCavin1
11	8	CAV 10	siCavin1
12	8	CAV 10	siCavin1
13	8	CAV 10	siCavin1
14	7	CAV 10	siCavin1
15	7	CAV 10	siCavin1
16	6	CAV 10	siCavin1
17	6	CAV 10	siCavin1
18	5	CAV 10	siCavin1
19	5	CAV 10	siCavin1
20	4	CAV 10	siCavin1
21	4	CAV 10	siCavin1
22	4	CAV 10	siCavin1
23	4	CAV 10	siCavin1
24	4	CAV 10	siCavin1
25	4	CAV 10	siCavin1
26	4	CAV 10	siCavin1
27	4	CAV 10	siCavin1
28	4	CAV 10	siCavin1
29	4	CAV 10	siCavin1
30	3	CAV 10	siCavin1
31	3	CAV 10	siCavin1
32	3	CAV 10	siCavin1
33	3	CAV 10	siCavin1
34	3	CAV 10	siCavin1
35	3	CAV 10	siCavin1
36	3	CAV 10	siCavin1
37	3	CAV 10	siCavin1
38	3	CAV 10	siCavin1
39	3	CAV 10	siCavin1
40	3	CAV 10	siCavin1
41	3	CAV 10	siCavin1
42	3	CAV 10	siCavin1
43	3	CAV 10	siCavin1
44	3	CAV 10	siCavin1
45	3	CAV 10	siCavin1
46	3	CAV 10	siCavin1
47	2	CAV 10	siCavin1
48	2	CAV 10	siCavin1
49	2	CAV 10	siCavin1
50	2	CAV 10	siCavin1
51	2	CAV 10	siCavin1
52	2	CAV 10	siCavin1
53	2	CAV 10	siCavin1
54	2	CAV 10	siCavin1
55	2	CAV 10	siCavin1
56	2	CAV 10	siCavin1
57	2	CAV 10	siCavin1
58	2	CAV 10	siCavin1
59	2	CAV 10	siCavin1
60	2	CAV 10	siCavin1
61	1	CAV 10	siCavin1
62	1	CAV 10	siCavin1
63	1	CAV 10	siCavin1
64	1	CAV 10	siCavin1
65	1	CAV 10	siCavin1
66	1	CAV 10	siCavin1
67	1	CAV 10	siCavin1
68	1	CAV 10	siCavin1
69	1	CAV 10	siCavin1
70	1	CAV 10	siCavin1
71	1	CAV 10	siCavin1
72	1	CAV 10	siCavin1
73	1	CAV 10	siCavin1
74	1	CAV 10	siCavin1
75	1	CAV 10	siCavin1
76	1	CAV 10	siCavin1
77	1	CAV 10	siCavin1
78	1	CAV 10	siCavin1
79	1	CAV 10	siCavin1
80	1	CAV 10	siCavin1
81	1	CAV 10	siCavin1
82	1	CAV 10	siCavin1
2	2	CAV 10	siCTRL
3	12	CAV 10	siCTRL
4	2	CAV 10	siCTRL
7	5	CAV 10	siCTRL
8	1	CAV 10	siCTRL
9	4	CAV 10	siCTRL
20	25	CAV 10	siCTRL
32	2	CAV 10	siCTRL
41	1	CAV 10	siCTRL
42	2	CAV 10	siCTRL
43	3	CAV 10	siCTRL
44	4	CAV 10	siCTRL
57	3	CAV 10	siCTRL
58	4	CAV 10	siCTRL
61	4	CAV 10	siCTRL
62	10	CAV 10	siCTRL
64	1	CAV 10	siCTRL
86	3	CAV 10	siCTRL
92	1	CAV 10	siCTRL
93	10	CAV 10	siCTRL
97	2	CAV 10	siCTRL
98	4	CAV 10	siCTRL
99	6	CAV 10	siCTRL
167	1	CAV 10	siCTRL
168	1	CAV 10	siCTRL
169	1	CAV 10	siCTRL
170	1	CAV 10	siCTRL
171	1	CAV 10	siCTRL
172	1	CAV 10	siCTRL
173	1	CAV 10	siCTRL
174	1	CAV 10	siCTRL
175	1	CAV 10	siCTRL
176	1	CAV 10	siCTRL
177	1	CAV 10	siCTRL
178	1	CAV 10	siCTRL
179	1	CAV 10	siCTRL
180	2	CAV 10	siCTRL
181	2	CAV 10	siCTRL
182	2	CAV 10	siCTRL
183	2	CAV 10	siCTRL
184	3	CAV 10	siCTRL
185	3	CAV 10	siCTRL
186	6	CAV 10	siCTRL
187	6	CAV 10	siCTRL
188	8	CAV 10	siCTRL
194	1	CAV 10	siCTRL
195	1	CAV 10	siCTRL
196	2	CAV 10	siCTRL
199	38	CAV 10	siCTRL
1	5	CAV 11	siCAV1
5	1	CAV 11	siCAV1
6	3	CAV 11	siCAV1
7	15	CAV 11	siCAV1
8	21	CAV 11	siCAV1
9	6	CAV 11	siCAV1
10	3	CAV 11	siCAV1
11	3	CAV 11	siCAV1
12	2	CAV 11	siCAV1
13	1	CAV 11	siCAV1
14	5	CAV 11	siCAV1
15	7	CAV 11	siCAV1
22	1	CAV 11	siCAV1
27	1	CAV 11	siCAV1
34	1	CAV 11	siCAV1
35	5	CAV 11	siCAV1
36	2	CAV 11	siCAV1
37	2	CAV 11	siCAV1
38	1	CAV 11	siCAV1
40	1	CAV 11	siCAV1
41	1	CAV 11	siCAV1
45	7	CAV 11	siCAV1
46	1	CAV 11	siCAV1
58	14	CAV 11	siCAV1
59	1	CAV 11	siCAV1
60	7	CAV 11	siCAV1
61	1	CAV 11	siCAV1
63	4	CAV 11	siCAV1
72	1	CAV 11	siCAV1
76	1	CAV 11	siCAV1
77	10	CAV 11	siCAV1
89	2	CAV 11	siCAV1
90	2	CAV 11	siCAV1
91	2	CAV 11	siCAV1
92	1	CAV 11	siCAV1
96	13	CAV 11	siCAV1
105	1	CAV 11	siCAV1
106	4	CAV 11	siCAV1
118	4	CAV 11	siCAV1
124	1	CAV 11	siCAV1
130	20	CAV 11	siCAV1
131	5	CAV 11	siCAV1
132	1	CAV 11	siCAV1
133	1	CAV 11	siCAV1
134	1	CAV 11	siCAV1
145	16	CAV 11	siCAV1
146	1	CAV 11	siCAV1
154	20	CAV 11	siCAV1
155	2	CAV 11	siCAV1
156	6	CAV 11	siCAV1
157	5	CAV 11	siCAV1
159	1	CAV 11	siCAV1
168	3	CAV 11	siCAV1
169	4	CAV 11	siCAV1
170	4	CAV 11	siCAV1
171	1	CAV 11	siCAV1
178	3	CAV 11	siCAV1
179	4	CAV 11	siCAV1
180	6	CAV 11	siCAV1
181	2	CAV 11	siCAV1
182	1	CAV 11	siCAV1
183	1	CAV 11	siCAV1
191	1	CAV 11	siCAV1
193	1	CAV 11	siCAV1
196	1	CAV 11	siCAV1
197	8	CAV 11	siCAV1
198	5	CAV 11	siCAV1
199	2	CAV 11	siCAV1
1	5	CAV 11	siCavin1
3	3	CAV 11	siCavin1
4	3	CAV 11	siCavin1
5	2	CAV 11	siCavin1
8	2	CAV 11	siCavin1
11	8	CAV 11	siCavin1
12	1	CAV 11	siCavin1
13	1	CAV 11	siCavin1
14	3	CAV 11	siCavin1
17	3	CAV 11	siCavin1
18	2	CAV 11	siCavin1
19	2	CAV 11	siCavin1
20	1	CAV 11	siCavin1
21	1	CAV 11	siCavin1
22	5	CAV 11	siCavin1
23	1	CAV 11	siCavin1
24	1	CAV 11	siCavin1
25	2	CAV 11	siCavin1
26	2	CAV 11	siCavin1
27	6	CAV 11	siCavin1
28	2	CAV 11	siCavin1
29	2	CAV 11	siCavin1
33	1	CAV 11	siCavin1
34	6	CAV 11	siCavin1
36	1	CAV 11	siCavin1
37	3	CAV 11	siCavin1
38	2	CAV 11	siCavin1
39	1	CAV 11	siCavin1
51	1	CAV 11	siCavin1
52	1	CAV 11	siCavin1
53	1	CAV 11	siCavin1
57	3	CAV 11	siCavin1
61	4	CAV 11	siCavin1
64	3	CAV 11	siCavin1
65	2	CAV 11	siCavin1
66	2	CAV 11	siCavin1
72	6	CAV 11	siCavin1
73	1	CAV 11	siCavin1
74	1	CAV 11	siCavin1
75	1	CAV 11	siCavin1
76	1	CAV 11	siCavin1
80	2	CAV 11	siCavin1
87	1	CAV 11	siCavin1
88	3	CAV 11	siCavin1
100	1	CAV 11	siCavin1
101	1	CAV 11	siCavin1
102	3	CAV 11	siCavin1
103	1	CAV 11	siCavin1
104	1	CAV 11	siCavin1
113	1	CAV 11	siCavin1
114	3	CAV 11	siCavin1
117	3	CAV 11	siCavin1
120	1	CAV 11	siCavin1
121	1	CAV 11	siCavin1
122	1	CAV 11	siCavin1
124	5	CAV 11	siCavin1
130	2	CAV 11	siCavin1
131	5	CAV 11	siCavin1
132	6	CAV 11	siCavin1
133	4	CAV 11	siCavin1
134	3	CAV 11	siCavin1
135	1	CAV 11	siCavin1
136	1	CAV 11	siCavin1
137	2	CAV 11	siCavin1
138	2	CAV 11	siCavin1
139	1	CAV 11	siCavin1
143	3	CAV 11	siCavin1
144	1	CAV 11	siCavin1
148	2	CAV 11	siCavin1
155	3	CAV 11	siCavin1
156	2	CAV 11	siCavin1
157	2	CAV 11	siCavin1
158	3	CAV 11	siCavin1
159	7	CAV 11	siCavin1
168	1	CAV 11	siCavin1
169	1	CAV 11	siCavin1
170	3	CAV 11	siCavin1
171	4	CAV 11	siCavin1
177	1	CAV 11	siCavin1
178	1	CAV 11	siCavin1
179	3	CAV 11	siCavin1
187	1	CAV 11	siCavin1
188	3	CAV 11	siCavin1
191	9	CAV 11	siCavin1
192	2	CAV 11	siCavin1
193	7	CAV 11	siCavin1
197	2	CAV 11	siCavin1
1	1	CAV 11	siCTRL
2	2	CAV 11	siCTRL
16	1	CAV 11	siCTRL
17	1	CAV 11	siCTRL
18	2	CAV 11	siCTRL
24	2	CAV 11	siCTRL
25	2	CAV 11	siCTRL
26	4	CAV 11	siCTRL
27	1	CAV 11	siCTRL
28	1	CAV 11	siCTRL
34	1	CAV 11	siCTRL
35	5	CAV 11	siCTRL
36	1	CAV 11	siCTRL
37	1	CAV 11	siCTRL
38	2	CAV 11	siCTRL
44	4	CAV 11	siCTRL
49	1	CAV 11	siCTRL
57	2	CAV 11	siCTRL
58	4	CAV 11	siCTRL
59	4	CAV 11	siCTRL
69	3	CAV 11	siCTRL
70	2	CAV 11	siCTRL
71	1	CAV 11	siCTRL
72	1	CAV 11	siCTRL
73	1	CAV 11	siCTRL
74	1	CAV 11	siCTRL
80	5	CAV 11	siCTRL
81	1	CAV 11	siCTRL
82	9	CAV 11	siCTRL
83	4	CAV 11	siCTRL
100	2	CAV 11	siCTRL
105	4	CAV 11	siCTRL
108	3	CAV 11	siCTRL
109	40	CAV 11	siCTRL
116	6	CAV 11	siCTRL
117	1	CAV 11	siCTRL
119	2	CAV 11	siCTRL
120	4	CAV 11	siCTRL
132	1	CAV 11	siCTRL
133	1	CAV 11	siCTRL
134	5	CAV 11	siCTRL
139	3	CAV 11	siCTRL
140	1	CAV 11	siCTRL
141	2	CAV 11	siCTRL
149	6	CAV 11	siCTRL
150	3	CAV 11	siCTRL
154	2	CAV 11	siCTRL
155	2	CAV 11	siCTRL
160	4	CAV 11	siCTRL
161	2	CAV 11	siCTRL
167	1	CAV 11	siCTRL
168	3	CAV 11	siCTRL
169	2	CAV 11	siCTRL
171	3	CAV 11	siCTRL
172	1	CAV 11	siCTRL
173	1	CAV 11	siCTRL
174	2	CAV 11	siCTRL
186	1	CAV 11	siCTRL
187	1	CAV 11	siCTRL
188	1	CAV 11	siCTRL
189	3	CAV 11	siCTRL
190	1	CAV 11	siCTRL
191	1	CAV 11	siCTRL
192	2	CAV 11	siCTRL
193	1	CAV 11	siCTRL
194	3	CAV 11	siCTRL
195	3	CAV 11	siCTRL
196	3	CAV 11	siCTRL

## Sheet: B
Condition	Prop_presence	SD_Prop_presence
siCTRL_EDIN	0.149149	0.0112708
siCAV1_EDIN	0.35461	0.0152275
siCavin1_EDIN	0.276276	0.0141474

## Sheet: B - raw
Cell.ID	Number.of.TEM	Experience	Condition
1	0	EDIN1	siCTRL_EDIN
2	0	EDIN1	siCTRL_EDIN
3	0	EDIN1	siCTRL_EDIN
4	0	EDIN1	siCTRL_EDIN
5	0	EDIN1	siCTRL_EDIN
6	0	EDIN1	siCTRL_EDIN
7	0	EDIN1	siCTRL_EDIN
8	0	EDIN1	siCTRL_EDIN
9	0	EDIN1	siCTRL_EDIN
10	0	EDIN1	siCTRL_EDIN
11	0	EDIN1	siCTRL_EDIN
12	0	EDIN1	siCTRL_EDIN
13	0	EDIN1	siCTRL_EDIN
14	0	EDIN1	siCTRL_EDIN
15	0	EDIN1	siCTRL_EDIN
16	0	EDIN1	siCTRL_EDIN
17	0	EDIN1	siCTRL_EDIN
18	0	EDIN1	siCTRL_EDIN
19	0	EDIN1	siCTRL_EDIN
20	0	EDIN1	siCTRL_EDIN
21	0	EDIN1	siCTRL_EDIN
22	0	EDIN1	siCTRL_EDIN
23	0	EDIN1	siCTRL_EDIN
24	0	EDIN1	siCTRL_EDIN
25	0	EDIN1	siCTRL_EDIN
26	0	EDIN1	siCTRL_EDIN
27	0	EDIN1	siCTRL_EDIN
28	0	EDIN1	siCTRL_EDIN
29	0	EDIN1	siCTRL_EDIN
30	0	EDIN1	siCTRL_EDIN
31	0	EDIN1	siCTRL_EDIN
32	0	EDIN1	siCTRL_EDIN
33	0	EDIN1	siCTRL_EDIN
34	0	EDIN1	siCTRL_EDIN
35	0	EDIN1	siCTRL_EDIN
36	0	EDIN1	siCTRL_EDIN
37	0	EDIN1	siCTRL_EDIN
38	0	EDIN1	siCTRL_EDIN
39	0	EDIN1	siCTRL_EDIN
40	0	EDIN1	siCTRL_EDIN
41	0	EDIN1	siCTRL_EDIN
42	0	EDIN1	siCTRL_EDIN
43	0	EDIN1	siCTRL_EDIN
44	0	EDIN1	siCTRL_EDIN
45	0	EDIN1	siCTRL_EDIN
46	0	EDIN1	siCTRL_EDIN
47	0	EDIN1	siCTRL_EDIN
48	0	EDIN1	siCTRL_EDIN
49	0	EDIN1	siCTRL_EDIN
50	0	EDIN1	siCTRL_EDIN
51	0	EDIN1	siCTRL_EDIN
52	0	EDIN1	siCTRL_EDIN
53	0	EDIN1	siCTRL_EDIN
54	0	EDIN1	siCTRL_EDIN
55	0	EDIN1	siCTRL_EDIN
56	0	EDIN1	siCTRL_EDIN
57	0	EDIN1	siCTRL_EDIN
58	0	EDIN1	siCTRL_EDIN
59	0	EDIN1	siCTRL_EDIN
60	0	EDIN1	siCTRL_EDIN
61	0	EDIN1	siCTRL_EDIN
62	0	EDIN1	siCTRL_EDIN
63	0	EDIN1	siCTRL_EDIN
64	0	EDIN1	siCTRL_EDIN
65	0	EDIN1	siCTRL_EDIN
66	0	EDIN1	siCTRL_EDIN
67	0	EDIN1	siCTRL_EDIN
68	0	EDIN1	siCTRL_EDIN
69	0	EDIN1	siCTRL_EDIN
70	0	EDIN1	siCTRL_EDIN
71	0	EDIN1	siCTRL_EDIN
72	0	EDIN1	siCTRL_EDIN
73	0	EDIN1	siCTRL_EDIN
74	0	EDIN1	siCTRL_EDIN
75	0	EDIN1	siCTRL_EDIN
76	0	EDIN1	siCTRL_EDIN
77	0	EDIN1	siCTRL_EDIN
78	0	EDIN1	siCTRL_EDIN
79	0	EDIN1	siCTRL_EDIN
80	0	EDIN1	siCTRL_EDIN
81	0	EDIN1	siCTRL_EDIN
82	0	EDIN1	siCTRL_EDIN
83	0	EDIN1	siCTRL_EDIN
84	0	EDIN1	siCTRL_EDIN
85	0	EDIN1	siCTRL_EDIN
86	0	EDIN1	siCTRL_EDIN
87	0	EDIN1	siCTRL_EDIN
88	0	EDIN1	siCTRL_EDIN
89	0	EDIN1	siCTRL_EDIN
90	0	EDIN1	siCTRL_EDIN
91	0	EDIN1	siCTRL_EDIN
92	0	EDIN1	siCTRL_EDIN
93	0	EDIN1	siCTRL_EDIN
94	0	EDIN1	siCTRL_EDIN
95	0	EDIN1	siCTRL_EDIN
96	0	EDIN1	siCTRL_EDIN
97	0	EDIN1	siCTRL_EDIN
98	0	EDIN1	siCTRL_EDIN
99	0	EDIN1	siCTRL_EDIN
100	0	EDIN1	siCTRL_EDIN
101	0	EDIN1	siCTRL_EDIN
102	0	EDIN1	siCTRL_EDIN
103	0	EDIN1	siCTRL_EDIN
104	0	EDIN1	siCTRL_EDIN
105	0	EDIN1	siCTRL_EDIN
106	0	EDIN1	siCTRL_EDIN
107	0	EDIN1	siCTRL_EDIN
108	0	EDIN1	siCTRL_EDIN
109	0	EDIN1	siCTRL_EDIN
110	0	EDIN1	siCTRL_EDIN
111	0	EDIN1	siCTRL_EDIN
112	0	EDIN1	siCTRL_EDIN
113	0	EDIN1	siCTRL_EDIN
114	0	EDIN1	siCTRL_EDIN
115	0	EDIN1	siCTRL_EDIN
116	0	EDIN1	siCTRL_EDIN
117	0	EDIN1	siCTRL_EDIN
118	0	EDIN1	siCTRL_EDIN
119	0	EDIN1	siCTRL_EDIN
120	0	EDIN1	siCTRL_EDIN
121	0	EDIN1	siCTRL_EDIN
122	0	EDIN1	siCTRL_EDIN
123	0	EDIN1	siCTRL_EDIN
124	0	EDIN1	siCTRL_EDIN
125	0	EDIN1	siCTRL_EDIN
126	0	EDIN1	siCTRL_EDIN
127	0	EDIN1	siCTRL_EDIN
128	0	EDIN1	siCTRL_EDIN
129	0	EDIN1	siCTRL_EDIN
130	0	EDIN1	siCTRL_EDIN
131	0	EDIN1	siCTRL_EDIN
132	0	EDIN1	siCTRL_EDIN
133	0	EDIN1	siCTRL_EDIN
134	0	EDIN1	siCTRL_EDIN
135	0	EDIN1	siCTRL_EDIN
136	0	EDIN1	siCTRL_EDIN
137	0	EDIN1	siCTRL_EDIN
138	0	EDIN1	siCTRL_EDIN
139	0	EDIN1	siCTRL_EDIN
140	0	EDIN1	siCTRL_EDIN
141	0	EDIN1	siCTRL_EDIN
142	0	EDIN1	siCTRL_EDIN
143	0	EDIN1	siCTRL_EDIN
144	0	EDIN1	siCTRL_EDIN
145	0	EDIN1	siCTRL_EDIN
146	0	EDIN1	siCTRL_EDIN
147	0	EDIN1	siCTRL_EDIN
148	0	EDIN1	siCTRL_EDIN
149	0	EDIN1	siCTRL_EDIN
150	0	EDIN1	siCTRL_EDIN
151	0	EDIN1	siCTRL_EDIN
152	0	EDIN1	siCTRL_EDIN
153	0	EDIN1	siCTRL_EDIN
154	0	EDIN1	siCTRL_EDIN
155	0	EDIN1	siCTRL_EDIN
156	0	EDIN1	siCTRL_EDIN
157	0	EDIN1	siCTRL_EDIN
158	0	EDIN1	siCTRL_EDIN
159	0	EDIN1	siCTRL_EDIN
160	0	EDIN1	siCTRL_EDIN
161	0	EDIN1	siCTRL_EDIN
162	0	EDIN1	siCTRL_EDIN
163	0	EDIN1	siCTRL_EDIN
164	0	EDIN1	siCTRL_EDIN
165	0	EDIN1	siCTRL_EDIN
166	0	EDIN1	siCTRL_EDIN
167	0	EDIN1	siCTRL_EDIN
168	0	EDIN1	siCTRL_EDIN
169	0	EDIN1	siCTRL_EDIN
170	0	EDIN1	siCTRL_EDIN
171	0	EDIN1	siCTRL_EDIN
172	0	EDIN1	siCTRL_EDIN
173	0	EDIN1	siCTRL_EDIN
174	0	EDIN1	siCTRL_EDIN
175	0	EDIN1	siCTRL_EDIN
176	0	EDIN1	siCTRL_EDIN
177	0	EDIN1	siCTRL_EDIN
178	0	EDIN1	siCTRL_EDIN
179	0	EDIN1	siCTRL_EDIN
180	0	EDIN1	siCTRL_EDIN
181	0	EDIN1	siCTRL_EDIN
182	0	EDIN1	siCTRL_EDIN
183	0	EDIN1	siCTRL_EDIN
1	0	EDIN2	siCTRL_EDIN
2	0	EDIN2	siCTRL_EDIN
3	0	EDIN2	siCTRL_EDIN
4	0	EDIN2	siCTRL_EDIN
5	0	EDIN2	siCTRL_EDIN
6	0	EDIN2	siCTRL_EDIN
7	0	EDIN2	siCTRL_EDIN
8	0	EDIN2	siCTRL_EDIN
9	0	EDIN2	siCTRL_EDIN
10	0	EDIN2	siCTRL_EDIN
11	0	EDIN2	siCTRL_EDIN
12	0	EDIN2	siCTRL_EDIN
13	0	EDIN2	siCTRL_EDIN
14	0	EDIN2	siCTRL_EDIN
15	0	EDIN2	siCTRL_EDIN
16	0	EDIN2	siCTRL_EDIN
17	0	EDIN2	siCTRL_EDIN
1	0	EDIN1	siCAV1_EDIN
2	0	EDIN1	siCAV1_EDIN
3	0	EDIN1	siCAV1_EDIN
4	0	EDIN1	siCAV1_EDIN
5	0	EDIN1	siCAV1_EDIN
6	0	EDIN1	siCAV1_EDIN
7	0	EDIN1	siCAV1_EDIN
8	0	EDIN1	siCAV1_EDIN
9	0	EDIN1	siCAV1_EDIN
10	0	EDIN1	siCAV1_EDIN
11	0	EDIN1	siCAV1_EDIN
12	0	EDIN1	siCAV1_EDIN
13	0	EDIN1	siCAV1_EDIN
14	0	EDIN1	siCAV1_EDIN
15	0	EDIN1	siCAV1_EDIN
16	0	EDIN1	siCAV1_EDIN
17	0	EDIN1	siCAV1_EDIN
18	0	EDIN1	siCAV1_EDIN
19	0	EDIN1	siCAV1_EDIN
20	0	EDIN1	siCAV1_EDIN
21	0	EDIN1	siCAV1_EDIN
22	0	EDIN1	siCAV1_EDIN
23	0	EDIN1	siCAV1_EDIN
24	0	EDIN1	siCAV1_EDIN
25	0	EDIN1	siCAV1_EDIN
26	0	EDIN1	siCAV1_EDIN
27	0	EDIN1	siCAV1_EDIN
28	0	EDIN1	siCAV1_EDIN
29	0	EDIN1	siCAV1_EDIN
30	0	EDIN1	siCAV1_EDIN
31	0	EDIN1	siCAV1_EDIN
32	0	EDIN1	siCAV1_EDIN
33	0	EDIN1	siCAV1_EDIN
34	0	EDIN1	siCAV1_EDIN
35	0	EDIN1	siCAV1_EDIN
36	0	EDIN1	siCAV1_EDIN
37	0	EDIN1	siCAV1_EDIN
38	0	EDIN1	siCAV1_EDIN
39	0	EDIN1	siCAV1_EDIN
40	0	EDIN1	siCAV1_EDIN
41	0	EDIN1	siCAV1_EDIN
42	0	EDIN1	siCAV1_EDIN
43	0	EDIN1	siCAV1_EDIN
44	0	EDIN1	siCAV1_EDIN
45	0	EDIN1	siCAV1_EDIN
46	0	EDIN1	siCAV1_EDIN
47	0	EDIN1	siCAV1_EDIN
48	0	EDIN1	siCAV1_EDIN
49	0	EDIN1	siCAV1_EDIN
50	0	EDIN1	siCAV1_EDIN
51	0	EDIN1	siCAV1_EDIN
52	0	EDIN1	siCAV1_EDIN
53	0	EDIN1	siCAV1_EDIN
54	0	EDIN1	siCAV1_EDIN
55	0	EDIN1	siCAV1_EDIN
56	0	EDIN1	siCAV1_EDIN
57	0	EDIN1	siCAV1_EDIN
58	0	EDIN1	siCAV1_EDIN
59	0	EDIN1	siCAV1_EDIN
60	0	EDIN1	siCAV1_EDIN
61	0	EDIN1	siCAV1_EDIN
62	0	EDIN1	siCAV1_EDIN
63	0	EDIN1	siCAV1_EDIN
64	0	EDIN1	siCAV1_EDIN
65	0	EDIN1	siCAV1_EDIN
66	0	EDIN1	siCAV1_EDIN
67	0	EDIN1	siCAV1_EDIN
68	0	EDIN1	siCAV1_EDIN
69	0	EDIN1	siCAV1_EDIN
70	0	EDIN1	siCAV1_EDIN
71	0	EDIN1	siCAV1_EDIN
72	0	EDIN1	siCAV1_EDIN
73	0	EDIN1	siCAV1_EDIN
74	0	EDIN1	siCAV1_EDIN
75	0	EDIN1	siCAV1_EDIN
76	0	EDIN1	siCAV1_EDIN
77	0	EDIN1	siCAV1_EDIN
78	0	EDIN1	siCAV1_EDIN
79	0	EDIN1	siCAV1_EDIN
80	0	EDIN1	siCAV1_EDIN
81	0	EDIN1	siCAV1_EDIN
82	0	EDIN1	siCAV1_EDIN
83	0	EDIN1	siCAV1_EDIN
84	0	EDIN1	siCAV1_EDIN
85	0	EDIN1	siCAV1_EDIN
86	0	EDIN1	siCAV1_EDIN
87	0	EDIN1	siCAV1_EDIN
88	0	EDIN1	siCAV1_EDIN
89	0	EDIN1	siCAV1_EDIN
90	0	EDIN1	siCAV1_EDIN
91	0	EDIN1	siCAV1_EDIN
92	0	EDIN1	siCAV1_EDIN
93	0	EDIN1	siCAV1_EDIN
94	0	EDIN1	siCAV1_EDIN
95	0	EDIN1	siCAV1_EDIN
96	0	EDIN1	siCAV1_EDIN
97	0	EDIN1	siCAV1_EDIN
98	0	EDIN1	siCAV1_EDIN
99	0	EDIN1	siCAV1_EDIN
100	0	EDIN1	siCAV1_EDIN
101	0	EDIN1	siCAV1_EDIN
102	0	EDIN1	siCAV1_EDIN
103	0	EDIN1	siCAV1_EDIN
104	0	EDIN1	siCAV1_EDIN
105	0	EDIN1	siCAV1_EDIN
106	0	EDIN1	siCAV1_EDIN
107	0	EDIN1	siCAV1_EDIN
108	0	EDIN1	siCAV1_EDIN
109	0	EDIN1	siCAV1_EDIN
110	0	EDIN1	siCAV1_EDIN
111	0	EDIN1	siCAV1_EDIN
112	0	EDIN1	siCAV1_EDIN
113	0	EDIN1	siCAV1_EDIN
114	0	EDIN1	siCAV1_EDIN
115	0	EDIN1	siCAV1_EDIN
116	0	EDIN1	siCAV1_EDIN
117	0	EDIN1	siCAV1_EDIN
118	0	EDIN1	siCAV1_EDIN
119	0	EDIN1	siCAV1_EDIN
120	0	EDIN1	siCAV1_EDIN
121	0	EDIN1	siCAV1_EDIN
122	0	EDIN1	siCAV1_EDIN
123	0	EDIN1	siCAV1_EDIN
124	0	EDIN1	siCAV1_EDIN
125	0	EDIN1	siCAV1_EDIN
126	0	EDIN1	siCAV1_EDIN
127	0	EDIN1	siCAV1_EDIN
128	0	EDIN1	siCAV1_EDIN
129	0	EDIN1	siCAV1_EDIN
130	0	EDIN1	siCAV1_EDIN
131	0	EDIN1	siCAV1_EDIN
132	0	EDIN1	siCAV1_EDIN
133	0	EDIN1	siCAV1_EDIN
134	0	EDIN1	siCAV1_EDIN
135	0	EDIN1	siCAV1_EDIN
136	0	EDIN1	siCAV1_EDIN
137	0	EDIN1	siCAV1_EDIN
138	0	EDIN1	siCAV1_EDIN
139	0	EDIN1	siCAV1_EDIN
140	0	EDIN1	siCAV1_EDIN
141	0	EDIN1	siCAV1_EDIN
142	0	EDIN1	siCAV1_EDIN
143	0	EDIN1	siCAV1_EDIN
144	0	EDIN1	siCAV1_EDIN
145	0	EDIN1	siCAV1_EDIN
146	0	EDIN1	siCAV1_EDIN
1	0	EDIN2	siCAV1_EDIN
2	0	EDIN2	siCAV1_EDIN
3	0	EDIN2	siCAV1_EDIN
4	0	EDIN2	siCAV1_EDIN
5	0	EDIN2	siCAV1_EDIN
6	0	EDIN2	siCAV1_EDIN
7	0	EDIN2	siCAV1_EDIN
8	0	EDIN2	siCAV1_EDIN
9	0	EDIN2	siCAV1_EDIN
10	0	EDIN2	siCAV1_EDIN
11	0	EDIN2	siCAV1_EDIN
12	0	EDIN2	siCAV1_EDIN
13	0	EDIN2	siCAV1_EDIN
14	0	EDIN2	siCAV1_EDIN
15	0	EDIN2	siCAV1_EDIN
16	0	EDIN2	siCAV1_EDIN
17	0	EDIN2	siCAV1_EDIN
18	0	EDIN2	siCAV1_EDIN
19	0	EDIN2	siCAV1_EDIN
20	0	EDIN2	siCAV1_EDIN
21	0	EDIN2	siCAV1_EDIN
22	0	EDIN2	siCAV1_EDIN
23	0	EDIN2	siCAV1_EDIN
24	0	EDIN2	siCAV1_EDIN
25	0	EDIN2	siCAV1_EDIN
26	0	EDIN2	siCAV1_EDIN
27	0	EDIN2	siCAV1_EDIN
28	0	EDIN2	siCAV1_EDIN
29	0	EDIN2	siCAV1_EDIN
30	0	EDIN2	siCAV1_EDIN
31	0	EDIN2	siCAV1_EDIN
32	0	EDIN2	siCAV1_EDIN
33	0	EDIN2	siCAV1_EDIN
34	0	EDIN2	siCAV1_EDIN
35	0	EDIN2	siCAV1_EDIN
36	0	EDIN2	siCAV1_EDIN
37	0	EDIN2	siCAV1_EDIN
38	0	EDIN2	siCAV1_EDIN
39	0	EDIN2	siCAV1_EDIN
40	0	EDIN2	siCAV1_EDIN
41	0	EDIN2	siCAV1_EDIN
42	0	EDIN2	siCAV1_EDIN
43	0	EDIN2	siCAV1_EDIN
44	0	EDIN2	siCAV1_EDIN
45	0	EDIN2	siCAV1_EDIN
46	0	EDIN2	siCAV1_EDIN
47	0	EDIN2	siCAV1_EDIN
48	0	EDIN2	siCAV1_EDIN
49	0	EDIN2	siCAV1_EDIN
50	0	EDIN2	siCAV1_EDIN
51	0	EDIN2	siCAV1_EDIN
52	0	EDIN2	siCAV1_EDIN
53	0	EDIN2	siCAV1_EDIN
54	0	EDIN2	siCAV1_EDIN
1	0	EDIN1	siCavin1_EDIN
2	0	EDIN1	siCavin1_EDIN
3	0	EDIN1	siCavin1_EDIN
4	0	EDIN1	siCavin1_EDIN
5	0	EDIN1	siCavin1_EDIN
6	0	EDIN1	siCavin1_EDIN
7	0	EDIN1	siCavin1_EDIN
8	0	EDIN1	siCavin1_EDIN
9	0	EDIN1	siCavin1_EDIN
10	0	EDIN1	siCavin1_EDIN
11	0	EDIN1	siCavin1_EDIN
12	0	EDIN1	siCavin1_EDIN
13	0	EDIN1	siCavin1_EDIN
14	0	EDIN1	siCavin1_EDIN
15	0	EDIN1	siCavin1_EDIN
16	0	EDIN1	siCavin1_EDIN
17	0	EDIN1	siCavin1_EDIN
18	0	EDIN1	siCavin1_EDIN
19	0	EDIN1	siCavin1_EDIN
20	0	EDIN1	siCavin1_EDIN
21	0	EDIN1	siCavin1_EDIN
22	0	EDIN1	siCavin1_EDIN
23	0	EDIN1	siCavin1_EDIN
24	0	EDIN1	siCavin1_EDIN
25	0	EDIN1	siCavin1_EDIN
26	0	EDIN1	siCavin1_EDIN
27	0	EDIN1	siCavin1_EDIN
28	0	EDIN1	siCavin1_EDIN
29	0	EDIN1	siCavin1_EDIN
30	0	EDIN1	siCavin1_EDIN
31	0	EDIN1	siCavin1_EDIN
32	0	EDIN1	siCavin1_EDIN
33	0	EDIN1	siCavin1_EDIN
34	0	EDIN1	siCavin1_EDIN
35	0	EDIN1	siCavin1_EDIN
36	0	EDIN1	siCavin1_EDIN
37	0	EDIN1	siCavin1_EDIN
38	0	EDIN1	siCavin1_EDIN
39	0	EDIN1	siCavin1_EDIN
40	0	EDIN1	siCavin1_EDIN
41	0	EDIN1	siCavin1_EDIN
42	0	EDIN1	siCavin1_EDIN
43	0	EDIN1	siCavin1_EDIN
44	0	EDIN1	siCavin1_EDIN
45	0	EDIN1	siCavin1_EDIN
46	0	EDIN1	siCavin1_EDIN
47	0	EDIN1	siCavin1_EDIN
48	0	EDIN1	siCavin1_EDIN
49	0	EDIN1	siCavin1_EDIN
50	0	EDIN1	siCavin1_EDIN
51	0	EDIN1	siCavin1_EDIN
52	0	EDIN1	siCavin1_EDIN
53	0	EDIN1	siCavin1_EDIN
54	0	EDIN1	siCavin1_EDIN
55	0	EDIN1	siCavin1_EDIN
56	0	EDIN1	siCavin1_EDIN
57	0	EDIN1	siCavin1_EDIN
58	0	EDIN1	siCavin1_EDIN
59	0	EDIN1	siCavin1_EDIN
60	0	EDIN1	siCavin1_EDIN
61	0	EDIN1	siCavin1_EDIN
62	0	EDIN1	siCavin1_EDIN
63	0	EDIN1	siCavin1_EDIN
64	0	EDIN1	siCavin1_EDIN
65	0	EDIN1	siCavin1_EDIN
66	0	EDIN1	siCavin1_EDIN
67	0	EDIN1	siCavin1_EDIN
68	0	EDIN1	siCavin1_EDIN
69	0	EDIN1	siCavin1_EDIN
70	0	EDIN1	siCavin1_EDIN
71	0	EDIN1	siCavin1_EDIN
72	0	EDIN1	siCavin1_EDIN
73	0	EDIN1	siCavin1_EDIN
74	0	EDIN1	siCavin1_EDIN
75	0	EDIN1	siCavin1_EDIN
76	0	EDIN1	siCavin1_EDIN
77	0	EDIN1	siCavin1_EDIN
78	0	EDIN1	siCavin1_EDIN
79	0	EDIN1	siCavin1_EDIN
80	0	EDIN1	siCavin1_EDIN
81	0	EDIN1	siCavin1_EDIN
82	0	EDIN1	siCavin1_EDIN
83	0	EDIN1	siCavin1_EDIN
84	0	EDIN1	siCavin1_EDIN
85	0	EDIN1	siCavin1_EDIN
86	0	EDIN1	siCavin1_EDIN
87	0	EDIN1	siCavin1_EDIN
88	0	EDIN1	siCavin1_EDIN
89	0	EDIN1	siCavin1_EDIN
90	0	EDIN1	siCavin1_EDIN
91	0	EDIN1	siCavin1_EDIN
92	0	EDIN1	siCavin1_EDIN
93	0	EDIN1	siCavin1_EDIN
94	0	EDIN1	siCavin1_EDIN
95	0	EDIN1	siCavin1_EDIN
96	0	EDIN1	siCavin1_EDIN
97	0	EDIN1	siCavin1_EDIN
98	0	EDIN1	siCavin1_EDIN
99	0	EDIN1	siCavin1_EDIN
100	0	EDIN1	siCavin1_EDIN
101	0	EDIN1	siCavin1_EDIN
102	0	EDIN1	siCavin1_EDIN
103	0	EDIN1	siCavin1_EDIN
104	0	EDIN1	siCavin1_EDIN
105	0	EDIN1	siCavin1_EDIN
106	0	EDIN1	siCavin1_EDIN
107	0	EDIN1	siCavin1_EDIN
108	0	EDIN1	siCavin1_EDIN
109	0	EDIN1	siCavin1_EDIN
110	0	EDIN1	siCavin1_EDIN
111	0	EDIN1	siCavin1_EDIN
112	0	EDIN1	siCavin1_EDIN
113	0	EDIN1	siCavin1_EDIN
114	0	EDIN1	siCavin1_EDIN
115	0	EDIN1	siCavin1_EDIN
116	0	EDIN1	siCavin1_EDIN
117	0	EDIN1	siCavin1_EDIN
118	0	EDIN1	siCavin1_EDIN
119	0	EDIN1	siCavin1_EDIN
120	0	EDIN1	siCavin1_EDIN
121	0	EDIN1	siCavin1_EDIN
122	0	EDIN1	siCavin1_EDIN
123	0	EDIN1	siCavin1_EDIN
124	0	EDIN1	siCavin1_EDIN
125	0	EDIN1	siCavin1_EDIN
126	0	EDIN1	siCavin1_EDIN
127	0	EDIN1	siCavin1_EDIN
128	0	EDIN1	siCavin1_EDIN
129	0	EDIN1	siCavin1_EDIN
130	0	EDIN1	siCavin1_EDIN
131	0	EDIN1	siCavin1_EDIN
132	0	EDIN1	siCavin1_EDIN
133	0	EDIN1	siCavin1_EDIN
134	0	EDIN1	siCavin1_EDIN
135	0	EDIN1	siCavin1_EDIN
136	0	EDIN1	siCavin1_EDIN
137	0	EDIN1	siCavin1_EDIN
138	0	EDIN1	siCavin1_EDIN
139	0	EDIN1	siCavin1_EDIN
140	0	EDIN1	siCavin1_EDIN
141	0	EDIN1	siCavin1_EDIN
142	0	EDIN1	siCavin1_EDIN
143	0	EDIN1	siCavin1_EDIN
144	0	EDIN1	siCavin1_EDIN
145	0	EDIN1	siCavin1_EDIN
146	0	EDIN1	siCavin1_EDIN
147	0	EDIN1	siCavin1_EDIN
148	0	EDIN1	siCavin1_EDIN
149	0	EDIN1	siCavin1_EDIN
150	0	EDIN1	siCavin1_EDIN
151	0	EDIN1	siCavin1_EDIN
152	0	EDIN1	siCavin1_EDIN
153	0	EDIN1	siCavin1_EDIN
154	0	EDIN1	siCavin1_EDIN
155	0	EDIN1	siCavin1_EDIN
156	0	EDIN1	siCavin1_EDIN
157	0	EDIN1	siCavin1_EDIN
158	0	EDIN1	siCavin1_EDIN
159	0	EDIN1	siCavin1_EDIN
160	0	EDIN1	siCavin1_EDIN
161	0	EDIN1	siCavin1_EDIN
162	0	EDIN1	siCavin1_EDIN
1	0	EDIN2	siCavin1_EDIN
2	0	EDIN2	siCavin1_EDIN
3	0	EDIN2	siCavin1_EDIN
4	0	EDIN2	siCavin1_EDIN
5	0	EDIN2	siCavin1_EDIN
6	0	EDIN2	siCavin1_EDIN
7	0	EDIN2	siCavin1_EDIN
8	0	EDIN2	siCavin1_EDIN
9	0	EDIN2	siCavin1_EDIN
10	0	EDIN2	siCavin1_EDIN
11	0	EDIN2	siCavin1_EDIN
12	0	EDIN2	siCavin1_EDIN
13	0	EDIN2	siCavin1_EDIN
14	0	EDIN2	siCavin1_EDIN
15	0	EDIN2	siCavin1_EDIN
16	0	EDIN2	siCavin1_EDIN
17	0	EDIN2	siCavin1_EDIN
18	0	EDIN2	siCavin1_EDIN
19	0	EDIN2	siCavin1_EDIN
20	0	EDIN2	siCavin1_EDIN
21	0	EDIN2	siCavin1_EDIN
22	0	EDIN2	siCavin1_EDIN
23	0	EDIN2	siCavin1_EDIN
24	0	EDIN2	siCavin1_EDIN
25	0	EDIN2	siCavin1_EDIN
26	0	EDIN2	siCavin1_EDIN
27	0	EDIN2	siCavin1_EDIN
28	0	EDIN2	siCavin1_EDIN
29	0	EDIN2	siCavin1_EDIN
30	0	EDIN2	siCavin1_EDIN
31	0	EDIN2	siCavin1_EDIN
32	0	EDIN2	siCavin1_EDIN
33	0	EDIN2	siCavin1_EDIN
34	0	EDIN2	siCavin1_EDIN
35	0	EDIN2	siCavin1_EDIN
36	0	EDIN2	siCavin1_EDIN
37	0	EDIN2	siCavin1_EDIN
38	0	EDIN2	siCavin1_EDIN
18	0	EDIN2	siCTRL_EDIN
19	0	EDIN2	siCTRL_EDIN
20	0	EDIN2	siCTRL_EDIN
21	0	EDIN2	siCTRL_EDIN
22	0	EDIN2	siCTRL_EDIN
23	0	EDIN2	siCTRL_EDIN
24	0	EDIN2	siCTRL_EDIN
25	0	EDIN2	siCTRL_EDIN
26	0	EDIN2	siCTRL_EDIN
27	0	EDIN2	siCTRL_EDIN
28	0	EDIN2	siCTRL_EDIN
29	0	EDIN2	siCTRL_EDIN
30	0	EDIN2	siCTRL_EDIN
31	0	EDIN2	siCTRL_EDIN
32	0	EDIN2	siCTRL_EDIN
33	0	EDIN2	siCTRL_EDIN
34	0	EDIN2	siCTRL_EDIN
35	0	EDIN2	siCTRL_EDIN
36	0	EDIN2	siCTRL_EDIN
37	0	EDIN2	siCTRL_EDIN
38	0	EDIN2	siCTRL_EDIN
39	0	EDIN2	siCTRL_EDIN
40	0	EDIN2	siCTRL_EDIN
41	0	EDIN2	siCTRL_EDIN
42	0	EDIN2	siCTRL_EDIN
43	0	EDIN2	siCTRL_EDIN
44	0	EDIN2	siCTRL_EDIN
45	0	EDIN2	siCTRL_EDIN
46	0	EDIN2	siCTRL_EDIN
47	0	EDIN2	siCTRL_EDIN
48	0	EDIN2	siCTRL_EDIN
49	0	EDIN2	siCTRL_EDIN
50	0	EDIN2	siCTRL_EDIN
51	0	EDIN2	siCTRL_EDIN
52	0	EDIN2	siCTRL_EDIN
53	0	EDIN2	siCTRL_EDIN
54	0	EDIN2	siCTRL_EDIN
55	0	EDIN2	siCTRL_EDIN
56	0	EDIN2	siCTRL_EDIN
57	0	EDIN2	siCTRL_EDIN
58	0	EDIN2	siCTRL_EDIN
59	0	EDIN2	siCTRL_EDIN
60	0	EDIN2	siCTRL_EDIN
61	0	EDIN2	siCTRL_EDIN
62	0	EDIN2	siCTRL_EDIN
63	0	EDIN2	siCTRL_EDIN
64	0	EDIN2	siCTRL_EDIN
65	0	EDIN2	siCTRL_EDIN
66	0	EDIN2	siCTRL_EDIN
67	0	EDIN2	siCTRL_EDIN
68	0	EDIN2	siCTRL_EDIN
69	0	EDIN2	siCTRL_EDIN
70	0	EDIN2	siCTRL_EDIN
71	0	EDIN2	siCTRL_EDIN
72	0	EDIN2	siCTRL_EDIN
73	0	EDIN2	siCTRL_EDIN
74	0	EDIN2	siCTRL_EDIN
75	0	EDIN2	siCTRL_EDIN
76	0	EDIN2	siCTRL_EDIN
77	0	EDIN2	siCTRL_EDIN
78	0	EDIN2	siCTRL_EDIN
79	0	EDIN2	siCTRL_EDIN
80	0	EDIN2	siCTRL_EDIN
81	0	EDIN2	siCTRL_EDIN
82	0	EDIN2	siCTRL_EDIN
83	0	EDIN2	siCTRL_EDIN
84	0	EDIN2	siCTRL_EDIN
85	0	EDIN2	siCTRL_EDIN
86	0	EDIN2	siCTRL_EDIN
87	0	EDIN2	siCTRL_EDIN
88	0	EDIN2	siCTRL_EDIN
89	0	EDIN2	siCTRL_EDIN
90	0	EDIN2	siCTRL_EDIN
91	0	EDIN2	siCTRL_EDIN
92	0	EDIN2	siCTRL_EDIN
93	0	EDIN2	siCTRL_EDIN
94	0	EDIN2	siCTRL_EDIN
95	0	EDIN2	siCTRL_EDIN
96	0	EDIN2	siCTRL_EDIN
97	0	EDIN2	siCTRL_EDIN
98	0	EDIN2	siCTRL_EDIN
99	0	EDIN2	siCTRL_EDIN
100	0	EDIN2	siCTRL_EDIN
101	0	EDIN2	siCTRL_EDIN
102	0	EDIN2	siCTRL_EDIN
103	0	EDIN2	siCTRL_EDIN
104	0	EDIN2	siCTRL_EDIN
105	0	EDIN2	siCTRL_EDIN
106	0	EDIN2	siCTRL_EDIN
107	0	EDIN2	siCTRL_EDIN
108	0	EDIN2	siCTRL_EDIN
109	0	EDIN2	siCTRL_EDIN
110	0	EDIN2	siCTRL_EDIN
111	0	EDIN2	siCTRL_EDIN
112	0	EDIN2	siCTRL_EDIN
113	0	EDIN2	siCTRL_EDIN
114	0	EDIN2	siCTRL_EDIN
115	0	EDIN2	siCTRL_EDIN
116	0	EDIN2	siCTRL_EDIN
117	0	EDIN2	siCTRL_EDIN
118	0	EDIN2	siCTRL_EDIN
119	0	EDIN2	siCTRL_EDIN
120	0	EDIN2	siCTRL_EDIN
121	0	EDIN2	siCTRL_EDIN
122	0	EDIN2	siCTRL_EDIN
123	0	EDIN2	siCTRL_EDIN
124	0	EDIN2	siCTRL_EDIN
125	0	EDIN2	siCTRL_EDIN
126	0	EDIN2	siCTRL_EDIN
127	0	EDIN2	siCTRL_EDIN
128	0	EDIN2	siCTRL_EDIN
129	0	EDIN2	siCTRL_EDIN
130	0	EDIN2	siCTRL_EDIN
131	0	EDIN2	siCTRL_EDIN
132	0	EDIN2	siCTRL_EDIN
133	0	EDIN2	siCTRL_EDIN
134	0	EDIN2	siCTRL_EDIN
135	0	EDIN2	siCTRL_EDIN
136	0	EDIN2	siCTRL_EDIN
137	0	EDIN2	siCTRL_EDIN
138	0	EDIN2	siCTRL_EDIN
139	0	EDIN2	siCTRL_EDIN
140	0	EDIN2	siCTRL_EDIN
141	0	EDIN2	siCTRL_EDIN
142	0	EDIN2	siCTRL_EDIN
143	0	EDIN2	siCTRL_EDIN
144	0	EDIN2	siCTRL_EDIN
145	0	EDIN2	siCTRL_EDIN
146	0	EDIN2	siCTRL_EDIN
147	0	EDIN2	siCTRL_EDIN
148	0	EDIN2	siCTRL_EDIN
149	0	EDIN2	siCTRL_EDIN
150	0	EDIN2	siCTRL_EDIN
151	0	EDIN2	siCTRL_EDIN
152	0	EDIN2	siCTRL_EDIN
153	0	EDIN2	siCTRL_EDIN
154	0	EDIN2	siCTRL_EDIN
155	0	EDIN2	siCTRL_EDIN
156	0	EDIN2	siCTRL_EDIN
157	0	EDIN2	siCTRL_EDIN
158	0	EDIN2	siCTRL_EDIN
159	0	EDIN2	siCTRL_EDIN
160	0	EDIN2	siCTRL_EDIN
161	0	EDIN2	siCTRL_EDIN
162	0	EDIN2	siCTRL_EDIN
163	0	EDIN2	siCTRL_EDIN
164	0	EDIN2	siCTRL_EDIN
165	0	EDIN2	siCTRL_EDIN
166	0	EDIN2	siCTRL_EDIN
167	0	EDIN2	siCTRL_EDIN
1	0	EDIN3	siCTRL_EDIN
2	0	EDIN3	siCTRL_EDIN
3	0	EDIN3	siCTRL_EDIN
4	0	EDIN3	siCTRL_EDIN
5	0	EDIN3	siCTRL_EDIN
6	0	EDIN3	siCTRL_EDIN
7	0	EDIN3	siCTRL_EDIN
8	0	EDIN3	siCTRL_EDIN
9	0	EDIN3	siCTRL_EDIN
10	0	EDIN3	siCTRL_EDIN
11	0	EDIN3	siCTRL_EDIN
12	0	EDIN3	siCTRL_EDIN
13	0	EDIN3	siCTRL_EDIN
14	0	EDIN3	siCTRL_EDIN
15	0	EDIN3	siCTRL_EDIN
16	0	EDIN3	siCTRL_EDIN
17	0	EDIN3	siCTRL_EDIN
18	0	EDIN3	siCTRL_EDIN
19	0	EDIN3	siCTRL_EDIN
20	0	EDIN3	siCTRL_EDIN
21	0	EDIN3	siCTRL_EDIN
22	0	EDIN3	siCTRL_EDIN
23	0	EDIN3	siCTRL_EDIN
24	0	EDIN3	siCTRL_EDIN
25	0	EDIN3	siCTRL_EDIN
26	0	EDIN3	siCTRL_EDIN
27	0	EDIN3	siCTRL_EDIN
28	0	EDIN3	siCTRL_EDIN
29	0	EDIN3	siCTRL_EDIN
30	0	EDIN3	siCTRL_EDIN
31	0	EDIN3	siCTRL_EDIN
32	0	EDIN3	siCTRL_EDIN
33	0	EDIN3	siCTRL_EDIN
34	0	EDIN3	siCTRL_EDIN
35	0	EDIN3	siCTRL_EDIN
36	0	EDIN3	siCTRL_EDIN
37	0	EDIN3	siCTRL_EDIN
38	0	EDIN3	siCTRL_EDIN
39	0	EDIN3	siCTRL_EDIN
40	0	EDIN3	siCTRL_EDIN
41	0	EDIN3	siCTRL_EDIN
42	0	EDIN3	siCTRL_EDIN
43	0	EDIN3	siCTRL_EDIN
44	0	EDIN3	siCTRL_EDIN
45	0	EDIN3	siCTRL_EDIN
46	0	EDIN3	siCTRL_EDIN
47	0	EDIN3	siCTRL_EDIN
48	0	EDIN3	siCTRL_EDIN
49	0	EDIN3	siCTRL_EDIN
55	0	EDIN2	siCAV1_EDIN
56	0	EDIN2	siCAV1_EDIN
57	0	EDIN2	siCAV1_EDIN
58	0	EDIN2	siCAV1_EDIN
59	0	EDIN2	siCAV1_EDIN
60	0	EDIN2	siCAV1_EDIN
61	0	EDIN2	siCAV1_EDIN
62	0	EDIN2	siCAV1_EDIN
63	0	EDIN2	siCAV1_EDIN
64	0	EDIN2	siCAV1_EDIN
65	0	EDIN2	siCAV1_EDIN
66	0	EDIN2	siCAV1_EDIN
67	0	EDIN2	siCAV1_EDIN
68	0	EDIN2	siCAV1_EDIN
69	0	EDIN2	siCAV1_EDIN
70	0	EDIN2	siCAV1_EDIN
71	0	EDIN2	siCAV1_EDIN
72	0	EDIN2	siCAV1_EDIN
73	0	EDIN2	siCAV1_EDIN
74	0	EDIN2	siCAV1_EDIN
75	0	EDIN2	siCAV1_EDIN
76	0	EDIN2	siCAV1_EDIN
77	0	EDIN2	siCAV1_EDIN
78	0	EDIN2	siCAV1_EDIN
79	0	EDIN2	siCAV1_EDIN
80	0	EDIN2	siCAV1_EDIN
81	0	EDIN2	siCAV1_EDIN
82	0	EDIN2	siCAV1_EDIN
83	0	EDIN2	siCAV1_EDIN
84	0	EDIN2	siCAV1_EDIN
85	0	EDIN2	siCAV1_EDIN
86	0	EDIN2	siCAV1_EDIN
87	0	EDIN2	siCAV1_EDIN
88	0	EDIN2	siCAV1_EDIN
89	0	EDIN2	siCAV1_EDIN
90	0	EDIN2	siCAV1_EDIN
91	0	EDIN2	siCAV1_EDIN
92	0	EDIN2	siCAV1_EDIN
93	0	EDIN2	siCAV1_EDIN
94	0	EDIN2	siCAV1_EDIN
95	0	EDIN2	siCAV1_EDIN
96	0	EDIN2	siCAV1_EDIN
97	0	EDIN2	siCAV1_EDIN
98	0	EDIN2	siCAV1_EDIN
99	0	EDIN2	siCAV1_EDIN
100	0	EDIN2	siCAV1_EDIN
101	0	EDIN2	siCAV1_EDIN
102	0	EDIN2	siCAV1_EDIN
103	0	EDIN2	siCAV1_EDIN
104	0	EDIN2	siCAV1_EDIN
105	0	EDIN2	siCAV1_EDIN
106	0	EDIN2	siCAV1_EDIN
107	0	EDIN2	siCAV1_EDIN
108	0	EDIN2	siCAV1_EDIN
109	0	EDIN2	siCAV1_EDIN
110	0	EDIN2	siCAV1_EDIN
111	0	EDIN2	siCAV1_EDIN
112	0	EDIN2	siCAV1_EDIN
113	0	EDIN2	siCAV1_EDIN
114	0	EDIN2	siCAV1_EDIN
115	0	EDIN2	siCAV1_EDIN
116	0	EDIN2	siCAV1_EDIN
117	0	EDIN2	siCAV1_EDIN
118	0	EDIN2	siCAV1_EDIN
119	0	EDIN2	siCAV1_EDIN
120	0	EDIN2	siCAV1_EDIN
121	0	EDIN2	siCAV1_EDIN
1	0	EDIN3	siCAV1_EDIN
2	0	EDIN3	siCAV1_EDIN
3	0	EDIN3	siCAV1_EDIN
4	0	EDIN3	siCAV1_EDIN
5	0	EDIN3	siCAV1_EDIN
6	0	EDIN3	siCAV1_EDIN
7	0	EDIN3	siCAV1_EDIN
8	0	EDIN3	siCAV1_EDIN
9	0	EDIN3	siCAV1_EDIN
10	0	EDIN3	siCAV1_EDIN
11	0	EDIN3	siCAV1_EDIN
12	0	EDIN3	siCAV1_EDIN
13	0	EDIN3	siCAV1_EDIN
14	0	EDIN3	siCAV1_EDIN
15	0	EDIN3	siCAV1_EDIN
16	0	EDIN3	siCAV1_EDIN
17	0	EDIN3	siCAV1_EDIN
18	0	EDIN3	siCAV1_EDIN
19	0	EDIN3	siCAV1_EDIN
20	0	EDIN3	siCAV1_EDIN
21	0	EDIN3	siCAV1_EDIN
22	0	EDIN3	siCAV1_EDIN
23	0	EDIN3	siCAV1_EDIN
24	0	EDIN3	siCAV1_EDIN
25	0	EDIN3	siCAV1_EDIN
26	0	EDIN3	siCAV1_EDIN
27	0	EDIN3	siCAV1_EDIN
28	0	EDIN3	siCAV1_EDIN
29	0	EDIN3	siCAV1_EDIN
30	0	EDIN3	siCAV1_EDIN
31	0	EDIN3	siCAV1_EDIN
32	0	EDIN3	siCAV1_EDIN
33	0	EDIN3	siCAV1_EDIN
34	0	EDIN3	siCAV1_EDIN
35	0	EDIN3	siCAV1_EDIN
36	0	EDIN3	siCAV1_EDIN
37	0	EDIN3	siCAV1_EDIN
38	0	EDIN3	siCAV1_EDIN
39	0	EDIN3	siCAV1_EDIN
40	0	EDIN3	siCAV1_EDIN
41	0	EDIN3	siCAV1_EDIN
42	0	EDIN3	siCAV1_EDIN
43	0	EDIN3	siCAV1_EDIN
44	0	EDIN3	siCAV1_EDIN
45	0	EDIN3	siCAV1_EDIN
46	0	EDIN3	siCAV1_EDIN
47	0	EDIN3	siCAV1_EDIN
48	0	EDIN3	siCAV1_EDIN
49	0	EDIN3	siCAV1_EDIN
50	0	EDIN3	siCAV1_EDIN
51	0	EDIN3	siCAV1_EDIN
52	0	EDIN3	siCAV1_EDIN
53	0	EDIN3	siCAV1_EDIN
54	0	EDIN3	siCAV1_EDIN
55	0	EDIN3	siCAV1_EDIN
56	0	EDIN3	siCAV1_EDIN
57	0	EDIN3	siCAV1_EDIN
58	0	EDIN3	siCAV1_EDIN
59	0	EDIN3	siCAV1_EDIN
60	0	EDIN3	siCAV1_EDIN
61	0	EDIN3	siCAV1_EDIN
62	0	EDIN3	siCAV1_EDIN
63	0	EDIN3	siCAV1_EDIN
64	0	EDIN3	siCAV1_EDIN
65	0	EDIN3	siCAV1_EDIN
66	0	EDIN3	siCAV1_EDIN
67	0	EDIN3	siCAV1_EDIN
68	0	EDIN3	siCAV1_EDIN
69	0	EDIN3	siCAV1_EDIN
70	0	EDIN3	siCAV1_EDIN
71	0	EDIN3	siCAV1_EDIN
72	0	EDIN3	siCAV1_EDIN
73	0	EDIN3	siCAV1_EDIN
74	0	EDIN3	siCAV1_EDIN
75	0	EDIN3	siCAV1_EDIN
76	0	EDIN3	siCAV1_EDIN
77	0	EDIN3	siCAV1_EDIN
78	0	EDIN3	siCAV1_EDIN
79	0	EDIN3	siCAV1_EDIN
80	0	EDIN3	siCAV1_EDIN
81	0	EDIN3	siCAV1_EDIN
82	0	EDIN3	siCAV1_EDIN
83	0	EDIN3	siCAV1_EDIN
84	0	EDIN3	siCAV1_EDIN
85	0	EDIN3	siCAV1_EDIN
86	0	EDIN3	siCAV1_EDIN
87	0	EDIN3	siCAV1_EDIN
88	0	EDIN3	siCAV1_EDIN
89	0	EDIN3	siCAV1_EDIN
90	0	EDIN3	siCAV1_EDIN
91	0	EDIN3	siCAV1_EDIN
92	0	EDIN3	siCAV1_EDIN
93	0	EDIN3	siCAV1_EDIN
94	0	EDIN3	siCAV1_EDIN
95	0	EDIN3	siCAV1_EDIN
96	0	EDIN3	siCAV1_EDIN
97	0	EDIN3	siCAV1_EDIN
98	0	EDIN3	siCAV1_EDIN
99	0	EDIN3	siCAV1_EDIN
100	0	EDIN3	siCAV1_EDIN
101	0	EDIN3	siCAV1_EDIN
102	0	EDIN3	siCAV1_EDIN
103	0	EDIN3	siCAV1_EDIN
104	0	EDIN3	siCAV1_EDIN
105	0	EDIN3	siCAV1_EDIN
106	0	EDIN3	siCAV1_EDIN
107	0	EDIN3	siCAV1_EDIN
108	0	EDIN3	siCAV1_EDIN
109	0	EDIN3	siCAV1_EDIN
110	0	EDIN3	siCAV1_EDIN
111	0	EDIN3	siCAV1_EDIN
112	0	EDIN3	siCAV1_EDIN
113	0	EDIN3	siCAV1_EDIN
114	0	EDIN3	siCAV1_EDIN
115	0	EDIN3	siCAV1_EDIN
116	0	EDIN3	siCAV1_EDIN
117	0	EDIN3	siCAV1_EDIN
1	0	EDIN4	siCAV1_EDIN
2	0	EDIN4	siCAV1_EDIN
3	0	EDIN4	siCAV1_EDIN
4	0	EDIN4	siCAV1_EDIN
5	0	EDIN4	siCAV1_EDIN
6	0	EDIN4	siCAV1_EDIN
7	0	EDIN4	siCAV1_EDIN
8	0	EDIN4	siCAV1_EDIN
9	0	EDIN4	siCAV1_EDIN
10	0	EDIN4	siCAV1_EDIN
11	0	EDIN4	siCAV1_EDIN
12	0	EDIN4	siCAV1_EDIN
13	0	EDIN4	siCAV1_EDIN
14	0	EDIN4	siCAV1_EDIN
15	0	EDIN4	siCAV1_EDIN
39	0	EDIN2	siCavin1_EDIN
40	0	EDIN2	siCavin1_EDIN
41	0	EDIN2	siCavin1_EDIN
42	0	EDIN2	siCavin1_EDIN
43	0	EDIN2	siCavin1_EDIN
44	0	EDIN2	siCavin1_EDIN
45	0	EDIN2	siCavin1_EDIN
46	0	EDIN2	siCavin1_EDIN
47	0	EDIN2	siCavin1_EDIN
48	0	EDIN2	siCavin1_EDIN
49	0	EDIN2	siCavin1_EDIN
50	0	EDIN2	siCavin1_EDIN
51	0	EDIN2	siCavin1_EDIN
52	0	EDIN2	siCavin1_EDIN
53	0	EDIN2	siCavin1_EDIN
54	0	EDIN2	siCavin1_EDIN
55	0	EDIN2	siCavin1_EDIN
56	0	EDIN2	siCavin1_EDIN
57	0	EDIN2	siCavin1_EDIN
58	0	EDIN2	siCavin1_EDIN
59	0	EDIN2	siCavin1_EDIN
60	0	EDIN2	siCavin1_EDIN
61	0	EDIN2	siCavin1_EDIN
62	0	EDIN2	siCavin1_EDIN
63	0	EDIN2	siCavin1_EDIN
64	0	EDIN2	siCavin1_EDIN
65	0	EDIN2	siCavin1_EDIN
66	0	EDIN2	siCavin1_EDIN
67	0	EDIN2	siCavin1_EDIN
68	0	EDIN2	siCavin1_EDIN
69	0	EDIN2	siCavin1_EDIN
70	0	EDIN2	siCavin1_EDIN
71	0	EDIN2	siCavin1_EDIN
72	0	EDIN2	siCavin1_EDIN
73	0	EDIN2	siCavin1_EDIN
74	0	EDIN2	siCavin1_EDIN
75	0	EDIN2	siCavin1_EDIN
76	0	EDIN2	siCavin1_EDIN
77	0	EDIN2	siCavin1_EDIN
78	0	EDIN2	siCavin1_EDIN
79	0	EDIN2	siCavin1_EDIN
80	0	EDIN2	siCavin1_EDIN
81	0	EDIN2	siCavin1_EDIN
82	0	EDIN2	siCavin1_EDIN
83	0	EDIN2	siCavin1_EDIN
84	0	EDIN2	siCavin1_EDIN
85	0	EDIN2	siCavin1_EDIN
86	0	EDIN2	siCavin1_EDIN
87	0	EDIN2	siCavin1_EDIN
88	0	EDIN2	siCavin1_EDIN
89	0	EDIN2	siCavin1_EDIN
90	0	EDIN2	siCavin1_EDIN
91	0	EDIN2	siCavin1_EDIN
92	0	EDIN2	siCavin1_EDIN
93	0	EDIN2	siCavin1_EDIN
94	0	EDIN2	siCavin1_EDIN
95	0	EDIN2	siCavin1_EDIN
96	0	EDIN2	siCavin1_EDIN
97	0	EDIN2	siCavin1_EDIN
98	0	EDIN2	siCavin1_EDIN
99	0	EDIN2	siCavin1_EDIN
100	0	EDIN2	siCavin1_EDIN
101	0	EDIN2	siCavin1_EDIN
102	0	EDIN2	siCavin1_EDIN
103	0	EDIN2	siCavin1_EDIN
104	0	EDIN2	siCavin1_EDIN
105	0	EDIN2	siCavin1_EDIN
106	0	EDIN2	siCavin1_EDIN
107	0	EDIN2	siCavin1_EDIN
108	0	EDIN2	siCavin1_EDIN
109	0	EDIN2	siCavin1_EDIN
110	0	EDIN2	siCavin1_EDIN
111	0	EDIN2	siCavin1_EDIN
112	0	EDIN2	siCavin1_EDIN
113	0	EDIN2	siCavin1_EDIN
114	0	EDIN2	siCavin1_EDIN
115	0	EDIN2	siCavin1_EDIN
116	0	EDIN2	siCavin1_EDIN
117	0	EDIN2	siCavin1_EDIN
118	0	EDIN2	siCavin1_EDIN
119	0	EDIN2	siCavin1_EDIN
120	0	EDIN2	siCavin1_EDIN
121	0	EDIN2	siCavin1_EDIN
122	0	EDIN2	siCavin1_EDIN
123	0	EDIN2	siCavin1_EDIN
124	0	EDIN2	siCavin1_EDIN
125	0	EDIN2	siCavin1_EDIN
126	0	EDIN2	siCavin1_EDIN
127	0	EDIN2	siCavin1_EDIN
128	0	EDIN2	siCavin1_EDIN
129	0	EDIN2	siCavin1_EDIN
130	0	EDIN2	siCavin1_EDIN
131	0	EDIN2	siCavin1_EDIN
132	0	EDIN2	siCavin1_EDIN
133	0	EDIN2	siCavin1_EDIN
134	0	EDIN2	siCavin1_EDIN
135	0	EDIN2	siCavin1_EDIN
136	0	EDIN2	siCavin1_EDIN
1	0	EDIN3	siCavin1_EDIN
2	0	EDIN3	siCavin1_EDIN
3	0	EDIN3	siCavin1_EDIN
4	0	EDIN3	siCavin1_EDIN
5	0	EDIN3	siCavin1_EDIN
6	0	EDIN3	siCavin1_EDIN
7	0	EDIN3	siCavin1_EDIN
8	0	EDIN3	siCavin1_EDIN
9	0	EDIN3	siCavin1_EDIN
10	0	EDIN3	siCavin1_EDIN
11	0	EDIN3	siCavin1_EDIN
12	0	EDIN3	siCavin1_EDIN
13	0	EDIN3	siCavin1_EDIN
14	0	EDIN3	siCavin1_EDIN
15	0	EDIN3	siCavin1_EDIN
16	0	EDIN3	siCavin1_EDIN
17	0	EDIN3	siCavin1_EDIN
18	0	EDIN3	siCavin1_EDIN
19	0	EDIN3	siCavin1_EDIN
20	0	EDIN3	siCavin1_EDIN
21	0	EDIN3	siCavin1_EDIN
22	0	EDIN3	siCavin1_EDIN
23	0	EDIN3	siCavin1_EDIN
24	0	EDIN3	siCavin1_EDIN
25	0	EDIN3	siCavin1_EDIN
26	0	EDIN3	siCavin1_EDIN
27	0	EDIN3	siCavin1_EDIN
28	0	EDIN3	siCavin1_EDIN
29	0	EDIN3	siCavin1_EDIN
30	0	EDIN3	siCavin1_EDIN
31	0	EDIN3	siCavin1_EDIN
32	0	EDIN3	siCavin1_EDIN
33	0	EDIN3	siCavin1_EDIN
34	0	EDIN3	siCavin1_EDIN
35	0	EDIN3	siCavin1_EDIN
36	0	EDIN3	siCavin1_EDIN
37	0	EDIN3	siCavin1_EDIN
38	0	EDIN3	siCavin1_EDIN
39	0	EDIN3	siCavin1_EDIN
40	0	EDIN3	siCavin1_EDIN
41	0	EDIN3	siCavin1_EDIN
42	0	EDIN3	siCavin1_EDIN
43	0	EDIN3	siCavin1_EDIN
44	0	EDIN3	siCavin1_EDIN
45	0	EDIN3	siCavin1_EDIN
46	0	EDIN3	siCavin1_EDIN
47	0	EDIN3	siCavin1_EDIN
48	0	EDIN3	siCavin1_EDIN
49	0	EDIN3	siCavin1_EDIN
50	0	EDIN3	siCavin1_EDIN
51	0	EDIN3	siCavin1_EDIN
52	0	EDIN3	siCavin1_EDIN
53	0	EDIN3	siCavin1_EDIN
54	0	EDIN3	siCavin1_EDIN
55	0	EDIN3	siCavin1_EDIN
56	0	EDIN3	siCavin1_EDIN
57	0	EDIN3	siCavin1_EDIN
58	0	EDIN3	siCavin1_EDIN
59	0	EDIN3	siCavin1_EDIN
60	0	EDIN3	siCavin1_EDIN
61	0	EDIN3	siCavin1_EDIN
62	0	EDIN3	siCavin1_EDIN
63	0	EDIN3	siCavin1_EDIN
64	0	EDIN3	siCavin1_EDIN
65	0	EDIN3	siCavin1_EDIN
66	0	EDIN3	siCavin1_EDIN
67	0	EDIN3	siCavin1_EDIN
68	0	EDIN3	siCavin1_EDIN
69	0	EDIN3	siCavin1_EDIN
70	0	EDIN3	siCavin1_EDIN
71	0	EDIN3	siCavin1_EDIN
72	0	EDIN3	siCavin1_EDIN
73	0	EDIN3	siCavin1_EDIN
74	0	EDIN3	siCavin1_EDIN
75	0	EDIN3	siCavin1_EDIN
76	0	EDIN3	siCavin1_EDIN
77	0	EDIN3	siCavin1_EDIN
78	0	EDIN3	siCavin1_EDIN
79	0	EDIN3	siCavin1_EDIN
80	0	EDIN3	siCavin1_EDIN
81	0	EDIN3	siCavin1_EDIN
82	0	EDIN3	siCavin1_EDIN
83	0	EDIN3	siCavin1_EDIN
84	0	EDIN3	siCavin1_EDIN
85	0	EDIN3	siCavin1_EDIN
86	0	EDIN3	siCavin1_EDIN
87	0	EDIN3	siCavin1_EDIN
88	0	EDIN3	siCavin1_EDIN
89	0	EDIN3	siCavin1_EDIN
90	0	EDIN3	siCavin1_EDIN
91	0	EDIN3	siCavin1_EDIN
92	0	EDIN3	siCavin1_EDIN
93	0	EDIN3	siCavin1_EDIN
94	0	EDIN3	siCavin1_EDIN
95	0	EDIN3	siCavin1_EDIN
96	0	EDIN3	siCavin1_EDIN
97	0	EDIN3	siCavin1_EDIN
98	0	EDIN3	siCavin1_EDIN
99	0	EDIN3	siCavin1_EDIN
100	0	EDIN3	siCavin1_EDIN
101	0	EDIN3	siCavin1_EDIN
50	0	EDIN3	siCTRL_EDIN
51	0	EDIN3	siCTRL_EDIN
52	0	EDIN3	siCTRL_EDIN
53	0	EDIN3	siCTRL_EDIN
54	0	EDIN3	siCTRL_EDIN
55	0	EDIN3	siCTRL_EDIN
56	0	EDIN3	siCTRL_EDIN
57	0	EDIN3	siCTRL_EDIN
58	0	EDIN3	siCTRL_EDIN
59	0	EDIN3	siCTRL_EDIN
60	0	EDIN3	siCTRL_EDIN
61	0	EDIN3	siCTRL_EDIN
62	0	EDIN3	siCTRL_EDIN
63	0	EDIN3	siCTRL_EDIN
64	0	EDIN3	siCTRL_EDIN
65	0	EDIN3	siCTRL_EDIN
66	0	EDIN3	siCTRL_EDIN
67	0	EDIN3	siCTRL_EDIN
68	0	EDIN3	siCTRL_EDIN
69	0	EDIN3	siCTRL_EDIN
70	0	EDIN3	siCTRL_EDIN
71	0	EDIN3	siCTRL_EDIN
72	0	EDIN3	siCTRL_EDIN
73	0	EDIN3	siCTRL_EDIN
74	0	EDIN3	siCTRL_EDIN
75	0	EDIN3	siCTRL_EDIN
76	0	EDIN3	siCTRL_EDIN
77	0	EDIN3	siCTRL_EDIN
78	0	EDIN3	siCTRL_EDIN
79	0	EDIN3	siCTRL_EDIN
80	0	EDIN3	siCTRL_EDIN
81	0	EDIN3	siCTRL_EDIN
82	0	EDIN3	siCTRL_EDIN
83	0	EDIN3	siCTRL_EDIN
84	0	EDIN3	siCTRL_EDIN
85	0	EDIN3	siCTRL_EDIN
86	0	EDIN3	siCTRL_EDIN
87	0	EDIN3	siCTRL_EDIN
88	0	EDIN3	siCTRL_EDIN
89	0	EDIN3	siCTRL_EDIN
90	0	EDIN3	siCTRL_EDIN
91	0	EDIN3	siCTRL_EDIN
92	0	EDIN3	siCTRL_EDIN
93	0	EDIN3	siCTRL_EDIN
94	0	EDIN3	siCTRL_EDIN
95	0	EDIN3	siCTRL_EDIN
96	0	EDIN3	siCTRL_EDIN
97	0	EDIN3	siCTRL_EDIN
98	0	EDIN3	siCTRL_EDIN
99	0	EDIN3	siCTRL_EDIN
100	0	EDIN3	siCTRL_EDIN
101	0	EDIN3	siCTRL_EDIN
102	0	EDIN3	siCTRL_EDIN
103	0	EDIN3	siCTRL_EDIN
104	0	EDIN3	siCTRL_EDIN
105	0	EDIN3	siCTRL_EDIN
106	0	EDIN3	siCTRL_EDIN
107	0	EDIN3	siCTRL_EDIN
108	0	EDIN3	siCTRL_EDIN
109	0	EDIN3	siCTRL_EDIN
110	0	EDIN3	siCTRL_EDIN
111	0	EDIN3	siCTRL_EDIN
112	0	EDIN3	siCTRL_EDIN
113	0	EDIN3	siCTRL_EDIN
114	0	EDIN3	siCTRL_EDIN
115	0	EDIN3	siCTRL_EDIN
116	0	EDIN3	siCTRL_EDIN
117	0	EDIN3	siCTRL_EDIN
118	0	EDIN3	siCTRL_EDIN
119	0	EDIN3	siCTRL_EDIN
120	0	EDIN3	siCTRL_EDIN
121	0	EDIN3	siCTRL_EDIN
122	0	EDIN3	siCTRL_EDIN
123	0	EDIN3	siCTRL_EDIN
124	0	EDIN3	siCTRL_EDIN
125	0	EDIN3	siCTRL_EDIN
126	0	EDIN3	siCTRL_EDIN
127	0	EDIN3	siCTRL_EDIN
128	0	EDIN3	siCTRL_EDIN
129	0	EDIN3	siCTRL_EDIN
130	0	EDIN3	siCTRL_EDIN
131	0	EDIN3	siCTRL_EDIN
132	0	EDIN3	siCTRL_EDIN
133	0	EDIN3	siCTRL_EDIN
134	0	EDIN3	siCTRL_EDIN
135	0	EDIN3	siCTRL_EDIN
136	0	EDIN3	siCTRL_EDIN
137	0	EDIN3	siCTRL_EDIN
138	0	EDIN3	siCTRL_EDIN
139	0	EDIN3	siCTRL_EDIN
140	0	EDIN3	siCTRL_EDIN
141	0	EDIN3	siCTRL_EDIN
142	0	EDIN3	siCTRL_EDIN
143	0	EDIN3	siCTRL_EDIN
144	0	EDIN3	siCTRL_EDIN
145	0	EDIN3	siCTRL_EDIN
146	0	EDIN3	siCTRL_EDIN
147	0	EDIN3	siCTRL_EDIN
148	0	EDIN3	siCTRL_EDIN
149	0	EDIN3	siCTRL_EDIN
150	0	EDIN3	siCTRL_EDIN
151	0	EDIN3	siCTRL_EDIN
152	0	EDIN3	siCTRL_EDIN
153	0	EDIN3	siCTRL_EDIN
154	0	EDIN3	siCTRL_EDIN
155	0	EDIN3	siCTRL_EDIN
156	0	EDIN3	siCTRL_EDIN
157	0	EDIN3	siCTRL_EDIN
158	0	EDIN3	siCTRL_EDIN
159	0	EDIN3	siCTRL_EDIN
160	0	EDIN3	siCTRL_EDIN
161	0	EDIN3	siCTRL_EDIN
162	0	EDIN3	siCTRL_EDIN
163	0	EDIN3	siCTRL_EDIN
164	0	EDIN3	siCTRL_EDIN
165	0	EDIN3	siCTRL_EDIN
166	0	EDIN3	siCTRL_EDIN
167	0	EDIN3	siCTRL_EDIN
168	0	EDIN3	siCTRL_EDIN
169	0	EDIN3	siCTRL_EDIN
170	0	EDIN3	siCTRL_EDIN
1	0	EDIN4	siCTRL_EDIN
2	0	EDIN4	siCTRL_EDIN
3	0	EDIN4	siCTRL_EDIN
4	0	EDIN4	siCTRL_EDIN
5	0	EDIN4	siCTRL_EDIN
6	0	EDIN4	siCTRL_EDIN
7	0	EDIN4	siCTRL_EDIN
8	0	EDIN4	siCTRL_EDIN
9	0	EDIN4	siCTRL_EDIN
10	0	EDIN4	siCTRL_EDIN
11	0	EDIN4	siCTRL_EDIN
12	0	EDIN4	siCTRL_EDIN
13	0	EDIN4	siCTRL_EDIN
14	0	EDIN4	siCTRL_EDIN
15	0	EDIN4	siCTRL_EDIN
16	0	EDIN4	siCTRL_EDIN
17	0	EDIN4	siCTRL_EDIN
18	0	EDIN4	siCTRL_EDIN
19	0	EDIN4	siCTRL_EDIN
20	0	EDIN4	siCTRL_EDIN
21	0	EDIN4	siCTRL_EDIN
22	0	EDIN4	siCTRL_EDIN
23	0	EDIN4	siCTRL_EDIN
24	0	EDIN4	siCTRL_EDIN
25	0	EDIN4	siCTRL_EDIN
26	0	EDIN4	siCTRL_EDIN
27	0	EDIN4	siCTRL_EDIN
28	0	EDIN4	siCTRL_EDIN
29	0	EDIN4	siCTRL_EDIN
30	0	EDIN4	siCTRL_EDIN
31	0	EDIN4	siCTRL_EDIN
32	0	EDIN4	siCTRL_EDIN
33	0	EDIN4	siCTRL_EDIN
34	0	EDIN4	siCTRL_EDIN
35	0	EDIN4	siCTRL_EDIN
36	0	EDIN4	siCTRL_EDIN
37	0	EDIN4	siCTRL_EDIN
38	0	EDIN4	siCTRL_EDIN
39	0	EDIN4	siCTRL_EDIN
40	0	EDIN4	siCTRL_EDIN
41	0	EDIN4	siCTRL_EDIN
42	0	EDIN4	siCTRL_EDIN
43	0	EDIN4	siCTRL_EDIN
44	0	EDIN4	siCTRL_EDIN
45	0	EDIN4	siCTRL_EDIN
46	0	EDIN4	siCTRL_EDIN
47	0	EDIN4	siCTRL_EDIN
48	0	EDIN4	siCTRL_EDIN
49	0	EDIN4	siCTRL_EDIN
50	0	EDIN4	siCTRL_EDIN
51	0	EDIN4	siCTRL_EDIN
52	0	EDIN4	siCTRL_EDIN
53	0	EDIN4	siCTRL_EDIN
54	0	EDIN4	siCTRL_EDIN
55	0	EDIN4	siCTRL_EDIN
56	0	EDIN4	siCTRL_EDIN
57	0	EDIN4	siCTRL_EDIN
58	0	EDIN4	siCTRL_EDIN
59	0	EDIN4	siCTRL_EDIN
60	0	EDIN4	siCTRL_EDIN
61	0	EDIN4	siCTRL_EDIN
62	0	EDIN4	siCTRL_EDIN
63	0	EDIN4	siCTRL_EDIN
64	0	EDIN4	siCTRL_EDIN
65	0	EDIN4	siCTRL_EDIN
66	0	EDIN4	siCTRL_EDIN
67	0	EDIN4	siCTRL_EDIN
68	0	EDIN4	siCTRL_EDIN
69	0	EDIN4	siCTRL_EDIN
70	0	EDIN4	siCTRL_EDIN
71	0	EDIN4	siCTRL_EDIN
72	0	EDIN4	siCTRL_EDIN
73	0	EDIN4	siCTRL_EDIN
74	0	EDIN4	siCTRL_EDIN
75	0	EDIN4	siCTRL_EDIN
76	0	EDIN4	siCTRL_EDIN
77	0	EDIN4	siCTRL_EDIN
78	0	EDIN4	siCTRL_EDIN
79	0	EDIN4	siCTRL_EDIN
16	0	EDIN4	siCAV1_EDIN
17	0	EDIN4	siCAV1_EDIN
18	0	EDIN4	siCAV1_EDIN
19	0	EDIN4	siCAV1_EDIN
20	0	EDIN4	siCAV1_EDIN
21	0	EDIN4	siCAV1_EDIN
22	0	EDIN4	siCAV1_EDIN
23	0	EDIN4	siCAV1_EDIN
24	0	EDIN4	siCAV1_EDIN
25	0	EDIN4	siCAV1_EDIN
26	0	EDIN4	siCAV1_EDIN
27	0	EDIN4	siCAV1_EDIN
28	0	EDIN4	siCAV1_EDIN
29	0	EDIN4	siCAV1_EDIN
30	0	EDIN4	siCAV1_EDIN
31	0	EDIN4	siCAV1_EDIN
32	0	EDIN4	siCAV1_EDIN
33	0	EDIN4	siCAV1_EDIN
34	0	EDIN4	siCAV1_EDIN
35	0	EDIN4	siCAV1_EDIN
36	0	EDIN4	siCAV1_EDIN
37	0	EDIN4	siCAV1_EDIN
38	0	EDIN4	siCAV1_EDIN
39	0	EDIN4	siCAV1_EDIN
40	0	EDIN4	siCAV1_EDIN
41	0	EDIN4	siCAV1_EDIN
42	0	EDIN4	siCAV1_EDIN
43	0	EDIN4	siCAV1_EDIN
44	0	EDIN4	siCAV1_EDIN
45	0	EDIN4	siCAV1_EDIN
46	0	EDIN4	siCAV1_EDIN
47	0	EDIN4	siCAV1_EDIN
48	0	EDIN4	siCAV1_EDIN
49	0	EDIN4	siCAV1_EDIN
50	0	EDIN4	siCAV1_EDIN
51	0	EDIN4	siCAV1_EDIN
52	0	EDIN4	siCAV1_EDIN
53	0	EDIN4	siCAV1_EDIN
54	0	EDIN4	siCAV1_EDIN
55	0	EDIN4	siCAV1_EDIN
56	0	EDIN4	siCAV1_EDIN
57	0	EDIN4	siCAV1_EDIN
58	0	EDIN4	siCAV1_EDIN
59	0	EDIN4	siCAV1_EDIN
60	0	EDIN4	siCAV1_EDIN
61	0	EDIN4	siCAV1_EDIN
62	0	EDIN4	siCAV1_EDIN
63	0	EDIN4	siCAV1_EDIN
64	0	EDIN4	siCAV1_EDIN
65	0	EDIN4	siCAV1_EDIN
66	0	EDIN4	siCAV1_EDIN
67	0	EDIN4	siCAV1_EDIN
68	0	EDIN4	siCAV1_EDIN
69	0	EDIN4	siCAV1_EDIN
70	0	EDIN4	siCAV1_EDIN
71	0	EDIN4	siCAV1_EDIN
72	0	EDIN4	siCAV1_EDIN
73	0	EDIN4	siCAV1_EDIN
74	0	EDIN4	siCAV1_EDIN
75	0	EDIN4	siCAV1_EDIN
76	0	EDIN4	siCAV1_EDIN
77	0	EDIN4	siCAV1_EDIN
78	0	EDIN4	siCAV1_EDIN
79	0	EDIN4	siCAV1_EDIN
80	0	EDIN4	siCAV1_EDIN
81	0	EDIN4	siCAV1_EDIN
82	0	EDIN4	siCAV1_EDIN
83	0	EDIN4	siCAV1_EDIN
84	0	EDIN4	siCAV1_EDIN
85	0	EDIN4	siCAV1_EDIN
86	0	EDIN4	siCAV1_EDIN
87	0	EDIN4	siCAV1_EDIN
88	0	EDIN4	siCAV1_EDIN
89	0	EDIN4	siCAV1_EDIN
90	0	EDIN4	siCAV1_EDIN
91	0	EDIN4	siCAV1_EDIN
92	0	EDIN4	siCAV1_EDIN
93	0	EDIN4	siCAV1_EDIN
94	0	EDIN4	siCAV1_EDIN
95	0	EDIN4	siCAV1_EDIN
96	0	EDIN4	siCAV1_EDIN
97	0	EDIN4	siCAV1_EDIN
98	0	EDIN4	siCAV1_EDIN
99	0	EDIN4	siCAV1_EDIN
100	0	EDIN4	siCAV1_EDIN
101	0	EDIN4	siCAV1_EDIN
102	0	EDIN4	siCAV1_EDIN
103	0	EDIN4	siCAV1_EDIN
104	0	EDIN4	siCAV1_EDIN
105	0	EDIN4	siCAV1_EDIN
106	0	EDIN4	siCAV1_EDIN
107	0	EDIN4	siCAV1_EDIN
108	0	EDIN4	siCAV1_EDIN
109	0	EDIN4	siCAV1_EDIN
110	0	EDIN4	siCAV1_EDIN
111	0	EDIN4	siCAV1_EDIN
112	0	EDIN4	siCAV1_EDIN
113	0	EDIN4	siCAV1_EDIN
114	0	EDIN4	siCAV1_EDIN
115	0	EDIN4	siCAV1_EDIN
116	0	EDIN4	siCAV1_EDIN
117	0	EDIN4	siCAV1_EDIN
118	0	EDIN4	siCAV1_EDIN
119	0	EDIN4	siCAV1_EDIN
120	0	EDIN4	siCAV1_EDIN
121	0	EDIN4	siCAV1_EDIN
122	0	EDIN4	siCAV1_EDIN
123	0	EDIN4	siCAV1_EDIN
124	0	EDIN4	siCAV1_EDIN
125	0	EDIN4	siCAV1_EDIN
126	0	EDIN4	siCAV1_EDIN
127	0	EDIN4	siCAV1_EDIN
128	0	EDIN4	siCAV1_EDIN
129	0	EDIN4	siCAV1_EDIN
130	0	EDIN4	siCAV1_EDIN
131	0	EDIN4	siCAV1_EDIN
1	0	EDIN5	siCAV1_EDIN
2	0	EDIN5	siCAV1_EDIN
3	0	EDIN5	siCAV1_EDIN
4	0	EDIN5	siCAV1_EDIN
5	0	EDIN5	siCAV1_EDIN
6	0	EDIN5	siCAV1_EDIN
7	0	EDIN5	siCAV1_EDIN
8	0	EDIN5	siCAV1_EDIN
9	0	EDIN5	siCAV1_EDIN
10	0	EDIN5	siCAV1_EDIN
11	0	EDIN5	siCAV1_EDIN
12	0	EDIN5	siCAV1_EDIN
13	0	EDIN5	siCAV1_EDIN
14	0	EDIN5	siCAV1_EDIN
15	0	EDIN5	siCAV1_EDIN
16	0	EDIN5	siCAV1_EDIN
17	0	EDIN5	siCAV1_EDIN
18	0	EDIN5	siCAV1_EDIN
19	0	EDIN5	siCAV1_EDIN
20	0	EDIN5	siCAV1_EDIN
21	0	EDIN5	siCAV1_EDIN
22	0	EDIN5	siCAV1_EDIN
23	0	EDIN5	siCAV1_EDIN
24	0	EDIN5	siCAV1_EDIN
25	0	EDIN5	siCAV1_EDIN
26	0	EDIN5	siCAV1_EDIN
27	0	EDIN5	siCAV1_EDIN
28	0	EDIN5	siCAV1_EDIN
29	0	EDIN5	siCAV1_EDIN
30	0	EDIN5	siCAV1_EDIN
31	0	EDIN5	siCAV1_EDIN
32	0	EDIN5	siCAV1_EDIN
33	0	EDIN5	siCAV1_EDIN
34	0	EDIN5	siCAV1_EDIN
35	0	EDIN5	siCAV1_EDIN
36	0	EDIN5	siCAV1_EDIN
37	0	EDIN5	siCAV1_EDIN
38	0	EDIN5	siCAV1_EDIN
39	0	EDIN5	siCAV1_EDIN
40	0	EDIN5	siCAV1_EDIN
41	0	EDIN5	siCAV1_EDIN
42	0	EDIN5	siCAV1_EDIN
43	0	EDIN5	siCAV1_EDIN
44	0	EDIN5	siCAV1_EDIN
45	0	EDIN5	siCAV1_EDIN
46	0	EDIN5	siCAV1_EDIN
47	0	EDIN5	siCAV1_EDIN
48	0	EDIN5	siCAV1_EDIN
49	0	EDIN5	siCAV1_EDIN
50	0	EDIN5	siCAV1_EDIN
51	0	EDIN5	siCAV1_EDIN
52	0	EDIN5	siCAV1_EDIN
53	0	EDIN5	siCAV1_EDIN
54	0	EDIN5	siCAV1_EDIN
55	0	EDIN5	siCAV1_EDIN
56	0	EDIN5	siCAV1_EDIN
57	0	EDIN5	siCAV1_EDIN
58	0	EDIN5	siCAV1_EDIN
59	0	EDIN5	siCAV1_EDIN
60	0	EDIN5	siCAV1_EDIN
61	0	EDIN5	siCAV1_EDIN
62	0	EDIN5	siCAV1_EDIN
63	0	EDIN5	siCAV1_EDIN
64	0	EDIN5	siCAV1_EDIN
65	0	EDIN5	siCAV1_EDIN
66	0	EDIN5	siCAV1_EDIN
67	0	EDIN5	siCAV1_EDIN
68	0	EDIN5	siCAV1_EDIN
69	0	EDIN5	siCAV1_EDIN
70	0	EDIN5	siCAV1_EDIN
71	0	EDIN5	siCAV1_EDIN
72	0	EDIN5	siCAV1_EDIN
73	0	EDIN5	siCAV1_EDIN
74	0	EDIN5	siCAV1_EDIN
75	0	EDIN5	siCAV1_EDIN
76	0	EDIN5	siCAV1_EDIN
77	0	EDIN5	siCAV1_EDIN
78	0	EDIN5	siCAV1_EDIN
79	0	EDIN5	siCAV1_EDIN
80	0	EDIN5	siCAV1_EDIN
81	0	EDIN5	siCAV1_EDIN
82	0	EDIN5	siCAV1_EDIN
83	0	EDIN5	siCAV1_EDIN
84	0	EDIN5	siCAV1_EDIN
102	0	EDIN3	siCavin1_EDIN
103	0	EDIN3	siCavin1_EDIN
104	0	EDIN3	siCavin1_EDIN
105	0	EDIN3	siCavin1_EDIN
106	0	EDIN3	siCavin1_EDIN
107	0	EDIN3	siCavin1_EDIN
108	0	EDIN3	siCavin1_EDIN
109	0	EDIN3	siCavin1_EDIN
110	0	EDIN3	siCavin1_EDIN
111	0	EDIN3	siCavin1_EDIN
112	0	EDIN3	siCavin1_EDIN
113	0	EDIN3	siCavin1_EDIN
114	0	EDIN3	siCavin1_EDIN
115	0	EDIN3	siCavin1_EDIN
116	0	EDIN3	siCavin1_EDIN
117	0	EDIN3	siCavin1_EDIN
118	0	EDIN3	siCavin1_EDIN
119	0	EDIN3	siCavin1_EDIN
120	0	EDIN3	siCavin1_EDIN
121	0	EDIN3	siCavin1_EDIN
122	0	EDIN3	siCavin1_EDIN
123	0	EDIN3	siCavin1_EDIN
124	0	EDIN3	siCavin1_EDIN
125	0	EDIN3	siCavin1_EDIN
126	0	EDIN3	siCavin1_EDIN
127	0	EDIN3	siCavin1_EDIN
128	0	EDIN3	siCavin1_EDIN
129	0	EDIN3	siCavin1_EDIN
130	0	EDIN3	siCavin1_EDIN
131	0	EDIN3	siCavin1_EDIN
132	0	EDIN3	siCavin1_EDIN
1	0	EDIN4	siCavin1_EDIN
2	0	EDIN4	siCavin1_EDIN
3	0	EDIN4	siCavin1_EDIN
4	0	EDIN4	siCavin1_EDIN
5	0	EDIN4	siCavin1_EDIN
6	0	EDIN4	siCavin1_EDIN
7	0	EDIN4	siCavin1_EDIN
8	0	EDIN4	siCavin1_EDIN
9	0	EDIN4	siCavin1_EDIN
10	0	EDIN4	siCavin1_EDIN
11	0	EDIN4	siCavin1_EDIN
12	0	EDIN4	siCavin1_EDIN
13	0	EDIN4	siCavin1_EDIN
14	0	EDIN4	siCavin1_EDIN
15	0	EDIN4	siCavin1_EDIN
16	0	EDIN4	siCavin1_EDIN
17	0	EDIN4	siCavin1_EDIN
18	0	EDIN4	siCavin1_EDIN
19	0	EDIN4	siCavin1_EDIN
20	0	EDIN4	siCavin1_EDIN
21	0	EDIN4	siCavin1_EDIN
22	0	EDIN4	siCavin1_EDIN
23	0	EDIN4	siCavin1_EDIN
24	0	EDIN4	siCavin1_EDIN
25	0	EDIN4	siCavin1_EDIN
26	0	EDIN4	siCavin1_EDIN
27	0	EDIN4	siCavin1_EDIN
28	0	EDIN4	siCavin1_EDIN
29	0	EDIN4	siCavin1_EDIN
30	0	EDIN4	siCavin1_EDIN
31	0	EDIN4	siCavin1_EDIN
32	0	EDIN4	siCavin1_EDIN
33	0	EDIN4	siCavin1_EDIN
34	0	EDIN4	siCavin1_EDIN
35	0	EDIN4	siCavin1_EDIN
36	0	EDIN4	siCavin1_EDIN
37	0	EDIN4	siCavin1_EDIN
38	0	EDIN4	siCavin1_EDIN
39	0	EDIN4	siCavin1_EDIN
40	0	EDIN4	siCavin1_EDIN
41	0	EDIN4	siCavin1_EDIN
42	0	EDIN4	siCavin1_EDIN
43	0	EDIN4	siCavin1_EDIN
44	0	EDIN4	siCavin1_EDIN
45	0	EDIN4	siCavin1_EDIN
46	0	EDIN4	siCavin1_EDIN
47	0	EDIN4	siCavin1_EDIN
48	0	EDIN4	siCavin1_EDIN
49	0	EDIN4	siCavin1_EDIN
50	0	EDIN4	siCavin1_EDIN
51	0	EDIN4	siCavin1_EDIN
52	0	EDIN4	siCavin1_EDIN
53	0	EDIN4	siCavin1_EDIN
54	0	EDIN4	siCavin1_EDIN
55	0	EDIN4	siCavin1_EDIN
56	0	EDIN4	siCavin1_EDIN
57	0	EDIN4	siCavin1_EDIN
58	0	EDIN4	siCavin1_EDIN
59	0	EDIN4	siCavin1_EDIN
60	0	EDIN4	siCavin1_EDIN
61	0	EDIN4	siCavin1_EDIN
62	0	EDIN4	siCavin1_EDIN
63	0	EDIN4	siCavin1_EDIN
64	0	EDIN4	siCavin1_EDIN
65	0	EDIN4	siCavin1_EDIN
66	0	EDIN4	siCavin1_EDIN
67	0	EDIN4	siCavin1_EDIN
68	0	EDIN4	siCavin1_EDIN
69	0	EDIN4	siCavin1_EDIN
70	0	EDIN4	siCavin1_EDIN
71	0	EDIN4	siCavin1_EDIN
72	0	EDIN4	siCavin1_EDIN
73	0	EDIN4	siCavin1_EDIN
74	0	EDIN4	siCavin1_EDIN
75	0	EDIN4	siCavin1_EDIN
76	0	EDIN4	siCavin1_EDIN
77	0	EDIN4	siCavin1_EDIN
78	0	EDIN4	siCavin1_EDIN
79	0	EDIN4	siCavin1_EDIN
80	0	EDIN4	siCavin1_EDIN
81	0	EDIN4	siCavin1_EDIN
82	0	EDIN4	siCavin1_EDIN
83	0	EDIN4	siCavin1_EDIN
84	0	EDIN4	siCavin1_EDIN
85	0	EDIN4	siCavin1_EDIN
86	0	EDIN4	siCavin1_EDIN
87	0	EDIN4	siCavin1_EDIN
88	0	EDIN4	siCavin1_EDIN
89	0	EDIN4	siCavin1_EDIN
90	0	EDIN4	siCavin1_EDIN
91	0	EDIN4	siCavin1_EDIN
92	0	EDIN4	siCavin1_EDIN
93	0	EDIN4	siCavin1_EDIN
94	0	EDIN4	siCavin1_EDIN
95	0	EDIN4	siCavin1_EDIN
96	0	EDIN4	siCavin1_EDIN
97	0	EDIN4	siCavin1_EDIN
98	0	EDIN4	siCavin1_EDIN
99	0	EDIN4	siCavin1_EDIN
100	0	EDIN4	siCavin1_EDIN
101	0	EDIN4	siCavin1_EDIN
102	0	EDIN4	siCavin1_EDIN
103	0	EDIN4	siCavin1_EDIN
104	0	EDIN4	siCavin1_EDIN
105	0	EDIN4	siCavin1_EDIN
106	0	EDIN4	siCavin1_EDIN
107	0	EDIN4	siCavin1_EDIN
108	0	EDIN4	siCavin1_EDIN
109	0	EDIN4	siCavin1_EDIN
110	0	EDIN4	siCavin1_EDIN
111	0	EDIN4	siCavin1_EDIN
112	0	EDIN4	siCavin1_EDIN
113	0	EDIN4	siCavin1_EDIN
114	0	EDIN4	siCavin1_EDIN
115	0	EDIN4	siCavin1_EDIN
116	0	EDIN4	siCavin1_EDIN
117	0	EDIN4	siCavin1_EDIN
118	0	EDIN4	siCavin1_EDIN
119	0	EDIN4	siCavin1_EDIN
120	0	EDIN4	siCavin1_EDIN
121	0	EDIN4	siCavin1_EDIN
122	0	EDIN4	siCavin1_EDIN
123	0	EDIN4	siCavin1_EDIN
124	0	EDIN4	siCavin1_EDIN
125	0	EDIN4	siCavin1_EDIN
126	0	EDIN4	siCavin1_EDIN
127	0	EDIN4	siCavin1_EDIN
128	0	EDIN4	siCavin1_EDIN
129	0	EDIN4	siCavin1_EDIN
130	0	EDIN4	siCavin1_EDIN
131	0	EDIN4	siCavin1_EDIN
132	0	EDIN4	siCavin1_EDIN
133	0	EDIN4	siCavin1_EDIN
134	0	EDIN4	siCavin1_EDIN
135	0	EDIN4	siCavin1_EDIN
136	0	EDIN4	siCavin1_EDIN
137	0	EDIN4	siCavin1_EDIN
138	0	EDIN4	siCavin1_EDIN
139	0	EDIN4	siCavin1_EDIN
140	0	EDIN4	siCavin1_EDIN
141	0	EDIN4	siCavin1_EDIN
142	0	EDIN4	siCavin1_EDIN
143	0	EDIN4	siCavin1_EDIN
144	0	EDIN4	siCavin1_EDIN
145	0	EDIN4	siCavin1_EDIN
146	0	EDIN4	siCavin1_EDIN
147	0	EDIN4	siCavin1_EDIN
148	0	EDIN4	siCavin1_EDIN
149	0	EDIN4	siCavin1_EDIN
150	0	EDIN4	siCavin1_EDIN
1	0	EDIN5	siCavin1_EDIN
2	0	EDIN5	siCavin1_EDIN
3	0	EDIN5	siCavin1_EDIN
4	0	EDIN5	siCavin1_EDIN
5	0	EDIN5	siCavin1_EDIN
6	0	EDIN5	siCavin1_EDIN
7	0	EDIN5	siCavin1_EDIN
8	0	EDIN5	siCavin1_EDIN
9	0	EDIN5	siCavin1_EDIN
10	0	EDIN5	siCavin1_EDIN
11	0	EDIN5	siCavin1_EDIN
12	0	EDIN5	siCavin1_EDIN
13	0	EDIN5	siCavin1_EDIN
14	0	EDIN5	siCavin1_EDIN
15	0	EDIN5	siCavin1_EDIN
16	0	EDIN5	siCavin1_EDIN
17	0	EDIN5	siCavin1_EDIN
18	0	EDIN5	siCavin1_EDIN
19	0	EDIN5	siCavin1_EDIN
80	0	EDIN4	siCTRL_EDIN
81	0	EDIN4	siCTRL_EDIN
82	0	EDIN4	siCTRL_EDIN
83	0	EDIN4	siCTRL_EDIN
84	0	EDIN4	siCTRL_EDIN
85	0	EDIN4	siCTRL_EDIN
86	0	EDIN4	siCTRL_EDIN
87	0	EDIN4	siCTRL_EDIN
88	0	EDIN4	siCTRL_EDIN
89	0	EDIN4	siCTRL_EDIN
90	0	EDIN4	siCTRL_EDIN
91	0	EDIN4	siCTRL_EDIN
92	0	EDIN4	siCTRL_EDIN
93	0	EDIN4	siCTRL_EDIN
94	0	EDIN4	siCTRL_EDIN
95	0	EDIN4	siCTRL_EDIN
96	0	EDIN4	siCTRL_EDIN
97	0	EDIN4	siCTRL_EDIN
98	0	EDIN4	siCTRL_EDIN
99	0	EDIN4	siCTRL_EDIN
100	0	EDIN4	siCTRL_EDIN
101	0	EDIN4	siCTRL_EDIN
102	0	EDIN4	siCTRL_EDIN
103	0	EDIN4	siCTRL_EDIN
104	0	EDIN4	siCTRL_EDIN
105	0	EDIN4	siCTRL_EDIN
106	0	EDIN4	siCTRL_EDIN
107	0	EDIN4	siCTRL_EDIN
108	0	EDIN4	siCTRL_EDIN
109	0	EDIN4	siCTRL_EDIN
110	0	EDIN4	siCTRL_EDIN
111	0	EDIN4	siCTRL_EDIN
112	0	EDIN4	siCTRL_EDIN
113	0	EDIN4	siCTRL_EDIN
114	0	EDIN4	siCTRL_EDIN
115	0	EDIN4	siCTRL_EDIN
116	0	EDIN4	siCTRL_EDIN
117	0	EDIN4	siCTRL_EDIN
118	0	EDIN4	siCTRL_EDIN
119	0	EDIN4	siCTRL_EDIN
120	0	EDIN4	siCTRL_EDIN
121	0	EDIN4	siCTRL_EDIN
122	0	EDIN4	siCTRL_EDIN
123	0	EDIN4	siCTRL_EDIN
124	0	EDIN4	siCTRL_EDIN
125	0	EDIN4	siCTRL_EDIN
126	0	EDIN4	siCTRL_EDIN
127	0	EDIN4	siCTRL_EDIN
128	0	EDIN4	siCTRL_EDIN
129	0	EDIN4	siCTRL_EDIN
130	0	EDIN4	siCTRL_EDIN
131	0	EDIN4	siCTRL_EDIN
132	0	EDIN4	siCTRL_EDIN
133	0	EDIN4	siCTRL_EDIN
134	0	EDIN4	siCTRL_EDIN
135	0	EDIN4	siCTRL_EDIN
136	0	EDIN4	siCTRL_EDIN
137	0	EDIN4	siCTRL_EDIN
138	0	EDIN4	siCTRL_EDIN
139	0	EDIN4	siCTRL_EDIN
140	0	EDIN4	siCTRL_EDIN
141	0	EDIN4	siCTRL_EDIN
142	0	EDIN4	siCTRL_EDIN
143	0	EDIN4	siCTRL_EDIN
144	0	EDIN4	siCTRL_EDIN
145	0	EDIN4	siCTRL_EDIN
146	0	EDIN4	siCTRL_EDIN
147	0	EDIN4	siCTRL_EDIN
148	0	EDIN4	siCTRL_EDIN
149	0	EDIN4	siCTRL_EDIN
150	0	EDIN4	siCTRL_EDIN
151	0	EDIN4	siCTRL_EDIN
152	0	EDIN4	siCTRL_EDIN
153	0	EDIN4	siCTRL_EDIN
154	0	EDIN4	siCTRL_EDIN
155	0	EDIN4	siCTRL_EDIN
156	0	EDIN4	siCTRL_EDIN
157	0	EDIN4	siCTRL_EDIN
158	0	EDIN4	siCTRL_EDIN
159	0	EDIN4	siCTRL_EDIN
160	0	EDIN4	siCTRL_EDIN
161	0	EDIN4	siCTRL_EDIN
162	0	EDIN4	siCTRL_EDIN
163	0	EDIN4	siCTRL_EDIN
164	0	EDIN4	siCTRL_EDIN
165	0	EDIN4	siCTRL_EDIN
166	0	EDIN4	siCTRL_EDIN
167	0	EDIN4	siCTRL_EDIN
168	0	EDIN4	siCTRL_EDIN
169	0	EDIN4	siCTRL_EDIN
170	0	EDIN4	siCTRL_EDIN
171	0	EDIN4	siCTRL_EDIN
172	0	EDIN4	siCTRL_EDIN
173	0	EDIN4	siCTRL_EDIN
1	0	EDIN5	siCTRL_EDIN
2	0	EDIN5	siCTRL_EDIN
3	0	EDIN5	siCTRL_EDIN
4	0	EDIN5	siCTRL_EDIN
5	0	EDIN5	siCTRL_EDIN
6	0	EDIN5	siCTRL_EDIN
7	0	EDIN5	siCTRL_EDIN
8	0	EDIN5	siCTRL_EDIN
9	0	EDIN5	siCTRL_EDIN
10	0	EDIN5	siCTRL_EDIN
11	0	EDIN5	siCTRL_EDIN
12	0	EDIN5	siCTRL_EDIN
13	0	EDIN5	siCTRL_EDIN
14	0	EDIN5	siCTRL_EDIN
15	0	EDIN5	siCTRL_EDIN
16	0	EDIN5	siCTRL_EDIN
17	0	EDIN5	siCTRL_EDIN
18	0	EDIN5	siCTRL_EDIN
19	0	EDIN5	siCTRL_EDIN
20	0	EDIN5	siCTRL_EDIN
21	0	EDIN5	siCTRL_EDIN
22	0	EDIN5	siCTRL_EDIN
23	0	EDIN5	siCTRL_EDIN
24	0	EDIN5	siCTRL_EDIN
25	0	EDIN5	siCTRL_EDIN
26	0	EDIN5	siCTRL_EDIN
27	0	EDIN5	siCTRL_EDIN
28	0	EDIN5	siCTRL_EDIN
29	0	EDIN5	siCTRL_EDIN
30	0	EDIN5	siCTRL_EDIN
31	0	EDIN5	siCTRL_EDIN
32	0	EDIN5	siCTRL_EDIN
33	0	EDIN5	siCTRL_EDIN
34	0	EDIN5	siCTRL_EDIN
35	0	EDIN5	siCTRL_EDIN
36	0	EDIN5	siCTRL_EDIN
37	0	EDIN5	siCTRL_EDIN
38	0	EDIN5	siCTRL_EDIN
39	0	EDIN5	siCTRL_EDIN
40	0	EDIN5	siCTRL_EDIN
41	0	EDIN5	siCTRL_EDIN
42	0	EDIN5	siCTRL_EDIN
43	0	EDIN5	siCTRL_EDIN
44	0	EDIN5	siCTRL_EDIN
45	0	EDIN5	siCTRL_EDIN
46	0	EDIN5	siCTRL_EDIN
47	0	EDIN5	siCTRL_EDIN
48	0	EDIN5	siCTRL_EDIN
49	0	EDIN5	siCTRL_EDIN
50	0	EDIN5	siCTRL_EDIN
51	0	EDIN5	siCTRL_EDIN
52	0	EDIN5	siCTRL_EDIN
53	0	EDIN5	siCTRL_EDIN
54	0	EDIN5	siCTRL_EDIN
55	0	EDIN5	siCTRL_EDIN
56	0	EDIN5	siCTRL_EDIN
57	0	EDIN5	siCTRL_EDIN
58	0	EDIN5	siCTRL_EDIN
59	0	EDIN5	siCTRL_EDIN
60	0	EDIN5	siCTRL_EDIN
61	0	EDIN5	siCTRL_EDIN
62	0	EDIN5	siCTRL_EDIN
63	0	EDIN5	siCTRL_EDIN
64	0	EDIN5	siCTRL_EDIN
65	0	EDIN5	siCTRL_EDIN
66	0	EDIN5	siCTRL_EDIN
67	0	EDIN5	siCTRL_EDIN
68	0	EDIN5	siCTRL_EDIN
69	0	EDIN5	siCTRL_EDIN
70	0	EDIN5	siCTRL_EDIN
71	0	EDIN5	siCTRL_EDIN
72	0	EDIN5	siCTRL_EDIN
73	0	EDIN5	siCTRL_EDIN
74	0	EDIN5	siCTRL_EDIN
75	0	EDIN5	siCTRL_EDIN
76	0	EDIN5	siCTRL_EDIN
77	0	EDIN5	siCTRL_EDIN
78	0	EDIN5	siCTRL_EDIN
79	0	EDIN5	siCTRL_EDIN
80	0	EDIN5	siCTRL_EDIN
81	0	EDIN5	siCTRL_EDIN
82	0	EDIN5	siCTRL_EDIN
83	0	EDIN5	siCTRL_EDIN
84	0	EDIN5	siCTRL_EDIN
85	0	EDIN5	siCTRL_EDIN
86	0	EDIN5	siCTRL_EDIN
87	0	EDIN5	siCTRL_EDIN
88	0	EDIN5	siCTRL_EDIN
89	0	EDIN5	siCTRL_EDIN
90	0	EDIN5	siCTRL_EDIN
91	0	EDIN5	siCTRL_EDIN
92	0	EDIN5	siCTRL_EDIN
93	0	EDIN5	siCTRL_EDIN
94	0	EDIN5	siCTRL_EDIN
95	0	EDIN5	siCTRL_EDIN
96	0	EDIN5	siCTRL_EDIN
97	0	EDIN5	siCTRL_EDIN
98	0	EDIN5	siCTRL_EDIN
99	0	EDIN5	siCTRL_EDIN
100	0	EDIN5	siCTRL_EDIN
101	0	EDIN5	siCTRL_EDIN
102	0	EDIN5	siCTRL_EDIN
103	0	EDIN5	siCTRL_EDIN
104	0	EDIN5	siCTRL_EDIN
105	0	EDIN5	siCTRL_EDIN
106	0	EDIN5	siCTRL_EDIN
85	0	EDIN5	siCAV1_EDIN
86	0	EDIN5	siCAV1_EDIN
[truncated: 986 more rows]

## Sheet: C
Cell.ID	Number.of.TEM	Experience	Condition
147	1	EDIN1	siCAV1_EDIN
148	1	EDIN1	siCAV1_EDIN
149	1	EDIN1	siCAV1_EDIN
150	1	EDIN1	siCAV1_EDIN
151	1	EDIN1	siCAV1_EDIN
152	1	EDIN1	siCAV1_EDIN
153	1	EDIN1	siCAV1_EDIN
154	1	EDIN1	siCAV1_EDIN
155	1	EDIN1	siCAV1_EDIN
156	1	EDIN1	siCAV1_EDIN
157	1	EDIN1	siCAV1_EDIN
158	1	EDIN1	siCAV1_EDIN
159	1	EDIN1	siCAV1_EDIN
160	1	EDIN1	siCAV1_EDIN
161	1	EDIN1	siCAV1_EDIN
162	1	EDIN1	siCAV1_EDIN
163	1	EDIN1	siCAV1_EDIN
164	1	EDIN1	siCAV1_EDIN
165	1	EDIN1	siCAV1_EDIN
166	1	EDIN1	siCAV1_EDIN
167	1	EDIN1	siCAV1_EDIN
168	1	EDIN1	siCAV1_EDIN
169	1	EDIN1	siCAV1_EDIN
170	1	EDIN1	siCAV1_EDIN
171	1	EDIN1	siCAV1_EDIN
172	1	EDIN1	siCAV1_EDIN
173	1	EDIN1	siCAV1_EDIN
174	1	EDIN1	siCAV1_EDIN
175	1	EDIN1	siCAV1_EDIN
122	1	EDIN2	siCAV1_EDIN
123	1	EDIN2	siCAV1_EDIN
124	1	EDIN2	siCAV1_EDIN
125	1	EDIN2	siCAV1_EDIN
126	1	EDIN2	siCAV1_EDIN
127	1	EDIN2	siCAV1_EDIN
128	1	EDIN2	siCAV1_EDIN
129	1	EDIN2	siCAV1_EDIN
130	1	EDIN2	siCAV1_EDIN
131	1	EDIN2	siCAV1_EDIN
132	1	EDIN2	siCAV1_EDIN
133	1	EDIN2	siCAV1_EDIN
134	1	EDIN2	siCAV1_EDIN
135	1	EDIN2	siCAV1_EDIN
136	1	EDIN2	siCAV1_EDIN
137	1	EDIN2	siCAV1_EDIN
138	1	EDIN2	siCAV1_EDIN
139	1	EDIN2	siCAV1_EDIN
140	1	EDIN2	siCAV1_EDIN
141	1	EDIN2	siCAV1_EDIN
142	1	EDIN2	siCAV1_EDIN
143	1	EDIN2	siCAV1_EDIN
144	1	EDIN2	siCAV1_EDIN
145	1	EDIN2	siCAV1_EDIN
146	1	EDIN2	siCAV1_EDIN
147	1	EDIN2	siCAV1_EDIN
148	1	EDIN2	siCAV1_EDIN
149	1	EDIN2	siCAV1_EDIN
150	1	EDIN2	siCAV1_EDIN
151	1	EDIN2	siCAV1_EDIN
152	1	EDIN2	siCAV1_EDIN
153	1	EDIN2	siCAV1_EDIN
154	1	EDIN2	siCAV1_EDIN
118	1	EDIN3	siCAV1_EDIN
119	1	EDIN3	siCAV1_EDIN
120	1	EDIN3	siCAV1_EDIN
121	1	EDIN3	siCAV1_EDIN
122	1	EDIN3	siCAV1_EDIN
123	1	EDIN3	siCAV1_EDIN
124	1	EDIN3	siCAV1_EDIN
125	1	EDIN3	siCAV1_EDIN
126	1	EDIN3	siCAV1_EDIN
127	1	EDIN3	siCAV1_EDIN
128	1	EDIN3	siCAV1_EDIN
129	1	EDIN3	siCAV1_EDIN
130	1	EDIN3	siCAV1_EDIN
131	1	EDIN3	siCAV1_EDIN
132	1	EDIN3	siCAV1_EDIN
133	1	EDIN3	siCAV1_EDIN
134	1	EDIN3	siCAV1_EDIN
135	1	EDIN3	siCAV1_EDIN
136	1	EDIN3	siCAV1_EDIN
137	1	EDIN3	siCAV1_EDIN
138	1	EDIN3	siCAV1_EDIN
139	1	EDIN3	siCAV1_EDIN
140	1	EDIN3	siCAV1_EDIN
141	1	EDIN3	siCAV1_EDIN
142	1	EDIN3	siCAV1_EDIN
143	1	EDIN3	siCAV1_EDIN
144	1	EDIN3	siCAV1_EDIN
145	1	EDIN3	siCAV1_EDIN
146	1	EDIN3	siCAV1_EDIN
147	1	EDIN3	siCAV1_EDIN
148	1	EDIN3	siCAV1_EDIN
149	1	EDIN3	siCAV1_EDIN
150	1	EDIN3	siCAV1_EDIN
151	1	EDIN3	siCAV1_EDIN
152	1	EDIN3	siCAV1_EDIN
153	1	EDIN3	siCAV1_EDIN
154	1	EDIN3	siCAV1_EDIN
155	1	EDIN3	siCAV1_EDIN
156	1	EDIN3	siCAV1_EDIN
157	1	EDIN3	siCAV1_EDIN
158	1	EDIN3	siCAV1_EDIN
159	1	EDIN3	siCAV1_EDIN
160	1	EDIN3	siCAV1_EDIN
132	1	EDIN4	siCAV1_EDIN
133	1	EDIN4	siCAV1_EDIN
134	1	EDIN4	siCAV1_EDIN
135	1	EDIN4	siCAV1_EDIN
136	1	EDIN4	siCAV1_EDIN
137	1	EDIN4	siCAV1_EDIN
138	1	EDIN4	siCAV1_EDIN
139	1	EDIN4	siCAV1_EDIN
140	1	EDIN4	siCAV1_EDIN
141	1	EDIN4	siCAV1_EDIN
142	1	EDIN4	siCAV1_EDIN
143	1	EDIN4	siCAV1_EDIN
144	1	EDIN4	siCAV1_EDIN
145	1	EDIN4	siCAV1_EDIN
146	1	EDIN4	siCAV1_EDIN
122	1	EDIN5	siCAV1_EDIN
123	1	EDIN5	siCAV1_EDIN
124	1	EDIN5	siCAV1_EDIN
125	1	EDIN5	siCAV1_EDIN
126	1	EDIN5	siCAV1_EDIN
127	1	EDIN5	siCAV1_EDIN
128	1	EDIN5	siCAV1_EDIN
129	1	EDIN5	siCAV1_EDIN
130	1	EDIN5	siCAV1_EDIN
131	1	EDIN5	siCAV1_EDIN
132	1	EDIN5	siCAV1_EDIN
133	1	EDIN5	siCAV1_EDIN
134	1	EDIN5	siCAV1_EDIN
135	1	EDIN5	siCAV1_EDIN
136	1	EDIN5	siCAV1_EDIN
137	1	EDIN5	siCAV1_EDIN
138	1	EDIN5	siCAV1_EDIN
176	2	EDIN1	siCAV1_EDIN
177	2	EDIN1	siCAV1_EDIN
178	2	EDIN1	siCAV1_EDIN
179	2	EDIN1	siCAV1_EDIN
180	2	EDIN1	siCAV1_EDIN
181	2	EDIN1	siCAV1_EDIN
182	2	EDIN1	siCAV1_EDIN
183	2	EDIN1	siCAV1_EDIN
184	2	EDIN1	siCAV1_EDIN
185	2	EDIN1	siCAV1_EDIN
186	2	EDIN1	siCAV1_EDIN
187	2	EDIN1	siCAV1_EDIN
155	2	EDIN2	siCAV1_EDIN
156	2	EDIN2	siCAV1_EDIN
157	2	EDIN2	siCAV1_EDIN
163	1	EDIN1	siCavin1_EDIN
164	1	EDIN1	siCavin1_EDIN
165	1	EDIN1	siCavin1_EDIN
166	1	EDIN1	siCavin1_EDIN
167	1	EDIN1	siCavin1_EDIN
168	1	EDIN1	siCavin1_EDIN
169	1	EDIN1	siCavin1_EDIN
170	1	EDIN1	siCavin1_EDIN
171	1	EDIN1	siCavin1_EDIN
172	1	EDIN1	siCavin1_EDIN
173	1	EDIN1	siCavin1_EDIN
174	1	EDIN1	siCavin1_EDIN
175	1	EDIN1	siCavin1_EDIN
176	1	EDIN1	siCavin1_EDIN
177	1	EDIN1	siCavin1_EDIN
178	1	EDIN1	siCavin1_EDIN
179	1	EDIN1	siCavin1_EDIN
180	1	EDIN1	siCavin1_EDIN
181	1	EDIN1	siCavin1_EDIN
137	1	EDIN2	siCavin1_EDIN
138	1	EDIN2	siCavin1_EDIN
139	1	EDIN2	siCavin1_EDIN
140	1	EDIN2	siCavin1_EDIN
141	1	EDIN2	siCavin1_EDIN
142	1	EDIN2	siCavin1_EDIN
143	1	EDIN2	siCavin1_EDIN
144	1	EDIN2	siCavin1_EDIN
145	1	EDIN2	siCavin1_EDIN
146	1	EDIN2	siCavin1_EDIN
147	1	EDIN2	siCavin1_EDIN
148	1	EDIN2	siCavin1_EDIN
149	1	EDIN2	siCavin1_EDIN
150	1	EDIN2	siCavin1_EDIN
151	1	EDIN2	siCavin1_EDIN
152	1	EDIN2	siCavin1_EDIN
153	1	EDIN2	siCavin1_EDIN
154	1	EDIN2	siCavin1_EDIN
155	1	EDIN2	siCavin1_EDIN
156	1	EDIN2	siCavin1_EDIN
157	1	EDIN2	siCavin1_EDIN
158	1	EDIN2	siCavin1_EDIN
159	1	EDIN2	siCavin1_EDIN
133	1	EDIN3	siCavin1_EDIN
134	1	EDIN3	siCavin1_EDIN
135	1	EDIN3	siCavin1_EDIN
136	1	EDIN3	siCavin1_EDIN
137	1	EDIN3	siCavin1_EDIN
138	1	EDIN3	siCavin1_EDIN
139	1	EDIN3	siCavin1_EDIN
140	1	EDIN3	siCavin1_EDIN
141	1	EDIN3	siCavin1_EDIN
142	1	EDIN3	siCavin1_EDIN
143	1	EDIN3	siCavin1_EDIN
144	1	EDIN3	siCavin1_EDIN
145	1	EDIN3	siCavin1_EDIN
146	1	EDIN3	siCavin1_EDIN
147	1	EDIN3	siCavin1_EDIN
148	1	EDIN3	siCavin1_EDIN
149	1	EDIN3	siCavin1_EDIN
150	1	EDIN3	siCavin1_EDIN
151	1	EDIN3	siCavin1_EDIN
152	1	EDIN3	siCavin1_EDIN
153	1	EDIN3	siCavin1_EDIN
154	1	EDIN3	siCavin1_EDIN
155	1	EDIN3	siCavin1_EDIN
156	1	EDIN3	siCavin1_EDIN
157	1	EDIN3	siCavin1_EDIN
158	1	EDIN3	siCavin1_EDIN
159	1	EDIN3	siCavin1_EDIN
160	1	EDIN3	siCavin1_EDIN
161	1	EDIN3	siCavin1_EDIN
162	1	EDIN3	siCavin1_EDIN
151	1	EDIN4	siCavin1_EDIN
152	1	EDIN4	siCavin1_EDIN
153	1	EDIN4	siCavin1_EDIN
154	1	EDIN4	siCavin1_EDIN
184	1	EDIN1	siCTRL_EDIN
185	1	EDIN1	siCTRL_EDIN
186	1	EDIN1	siCTRL_EDIN
187	1	EDIN1	siCTRL_EDIN
188	1	EDIN1	siCTRL_EDIN
189	1	EDIN1	siCTRL_EDIN
190	1	EDIN1	siCTRL_EDIN
191	1	EDIN1	siCTRL_EDIN
192	1	EDIN1	siCTRL_EDIN
193	1	EDIN1	siCTRL_EDIN
194	1	EDIN1	siCTRL_EDIN
195	1	EDIN1	siCTRL_EDIN
196	1	EDIN1	siCTRL_EDIN
168	1	EDIN2	siCTRL_EDIN
169	1	EDIN2	siCTRL_EDIN
170	1	EDIN2	siCTRL_EDIN
171	1	EDIN2	siCTRL_EDIN
172	1	EDIN2	siCTRL_EDIN
173	1	EDIN2	siCTRL_EDIN
174	1	EDIN2	siCTRL_EDIN
175	1	EDIN2	siCTRL_EDIN
176	1	EDIN2	siCTRL_EDIN
177	1	EDIN2	siCTRL_EDIN
178	1	EDIN2	siCTRL_EDIN
179	1	EDIN2	siCTRL_EDIN
180	1	EDIN2	siCTRL_EDIN
181	1	EDIN2	siCTRL_EDIN
182	1	EDIN2	siCTRL_EDIN
171	1	EDIN3	siCTRL_EDIN
172	1	EDIN3	siCTRL_EDIN
173	1	EDIN3	siCTRL_EDIN
174	1	EDIN3	siCTRL_EDIN
175	1	EDIN3	siCTRL_EDIN
176	1	EDIN3	siCTRL_EDIN
177	1	EDIN3	siCTRL_EDIN
178	1	EDIN3	siCTRL_EDIN
179	1	EDIN3	siCTRL_EDIN
180	1	EDIN3	siCTRL_EDIN
181	1	EDIN3	siCTRL_EDIN
182	1	EDIN3	siCTRL_EDIN
174	1	EDIN4	siCTRL_EDIN
175	1	EDIN4	siCTRL_EDIN
176	1	EDIN4	siCTRL_EDIN
177	1	EDIN4	siCTRL_EDIN
178	1	EDIN4	siCTRL_EDIN
179	1	EDIN4	siCTRL_EDIN
180	1	EDIN4	siCTRL_EDIN
181	1	EDIN4	siCTRL_EDIN
182	1	EDIN4	siCTRL_EDIN
183	1	EDIN4	siCTRL_EDIN
184	1	EDIN4	siCTRL_EDIN
185	1	EDIN4	siCTRL_EDIN
186	1	EDIN4	siCTRL_EDIN
187	1	EDIN4	siCTRL_EDIN
188	1	EDIN4	siCTRL_EDIN
158	1	EDIN5	siCTRL_EDIN
159	1	EDIN5	siCTRL_EDIN
160	1	EDIN5	siCTRL_EDIN
161	1	EDIN5	siCTRL_EDIN
162	1	EDIN5	siCTRL_EDIN
163	1	EDIN5	siCTRL_EDIN
164	1	EDIN5	siCTRL_EDIN
165	1	EDIN5	siCTRL_EDIN
166	1	EDIN5	siCTRL_EDIN
167	1	EDIN5	siCTRL_EDIN
168	1	EDIN5	siCTRL_EDIN
169	1	EDIN5	siCTRL_EDIN
170	1	EDIN5	siCTRL_EDIN
171	1	EDIN5	siCTRL_EDIN
172	1	EDIN5	siCTRL_EDIN
173	1	EDIN5	siCTRL_EDIN
174	1	EDIN5	siCTRL_EDIN
175	1	EDIN5	siCTRL_EDIN
197	2	EDIN1	siCTRL_EDIN
198	2	EDIN1	siCTRL_EDIN
199	2	EDIN1	siCTRL_EDIN
183	2	EDIN2	siCTRL_EDIN
184	2	EDIN2	siCTRL_EDIN
185	2	EDIN2	siCTRL_EDIN
186	2	EDIN2	siCTRL_EDIN
187	2	EDIN2	siCTRL_EDIN
188	2	EDIN2	siCTRL_EDIN
183	2	EDIN3	siCTRL_EDIN
184	2	EDIN3	siCTRL_EDIN
185	2	EDIN3	siCTRL_EDIN
186	2	EDIN3	siCTRL_EDIN
187	2	EDIN3	siCTRL_EDIN
188	2	EDIN3	siCTRL_EDIN
189	2	EDIN3	siCTRL_EDIN
190	2	EDIN3	siCTRL_EDIN
191	2	EDIN3	siCTRL_EDIN
192	2	EDIN3	siCTRL_EDIN
193	2	EDIN3	siCTRL_EDIN
194	2	EDIN3	siCTRL_EDIN
189	2	EDIN4	siCTRL_EDIN
190	2	EDIN4	siCTRL_EDIN
191	2	EDIN4	siCTRL_EDIN
192	2	EDIN4	siCTRL_EDIN
193	2	EDIN4	siCTRL_EDIN
176	2	EDIN5	siCTRL_EDIN
177	2	EDIN5	siCTRL_EDIN
178	2	EDIN5	siCTRL_EDIN
179	2	EDIN5	siCTRL_EDIN
180	2	EDIN5	siCTRL_EDIN
181	2	EDIN5	siCTRL_EDIN
182	2	EDIN5	siCTRL_EDIN
200	3	EDIN1	siCTRL_EDIN
189	3	EDIN2	siCTRL_EDIN
190	3	EDIN2	siCTRL_EDIN
191	3	EDIN2	siCTRL_EDIN
192	3	EDIN2	siCTRL_EDIN
193	3	EDIN2	siCTRL_EDIN
194	3	EDIN2	siCTRL_EDIN
195	3	EDIN2	siCTRL_EDIN
195	3	EDIN3	siCTRL_EDIN
196	3	EDIN3	siCTRL_EDIN
197	3	EDIN3	siCTRL_EDIN
194	3	EDIN4	siCTRL_EDIN
195	3	EDIN4	siCTRL_EDIN
196	3	EDIN4	siCTRL_EDIN
197	3	EDIN4	siCTRL_EDIN
198	3	EDIN4	siCTRL_EDIN
183	3	EDIN5	siCTRL_EDIN
184	3	EDIN5	siCTRL_EDIN
185	3	EDIN5	siCTRL_EDIN
186	3	EDIN5	siCTRL_EDIN
187	3	EDIN5	siCTRL_EDIN
188	3	EDIN5	siCTRL_EDIN
196	4	EDIN2	siCTRL_EDIN
197	4	EDIN2	siCTRL_EDIN
198	4	EDIN2	siCTRL_EDIN
198	4	EDIN3	siCTRL_EDIN
189	4	EDIN5	siCTRL_EDIN
190	4	EDIN5	siCTRL_EDIN
199	5	EDIN3	siCTRL_EDIN
200	5	EDIN3	siCTRL_EDIN
191	5	EDIN5	siCTRL_EDIN
192	5	EDIN5	siCTRL_EDIN
193	5	EDIN5	siCTRL_EDIN
199	6	EDIN4	siCTRL_EDIN
194	6	EDIN5	siCTRL_EDIN
195	6	EDIN5	siCTRL_EDIN
200	7	EDIN4	siCTRL_EDIN
196	7	EDIN5	siCTRL_EDIN
197	7	EDIN5	siCTRL_EDIN
198	8	EDIN5	siCTRL_EDIN
199	11	EDIN5	siCTRL_EDIN
200	15	EDIN5	siCTRL_EDIN
199	18	EDIN2	siCTRL_EDIN
158	2	EDIN2	siCAV1_EDIN
159	2	EDIN2	siCAV1_EDIN
160	2	EDIN2	siCAV1_EDIN
161	2	EDIN2	siCAV1_EDIN
162	2	EDIN2	siCAV1_EDIN
163	2	EDIN2	siCAV1_EDIN
164	2	EDIN2	siCAV1_EDIN
165	2	EDIN2	siCAV1_EDIN
166	2	EDIN2	siCAV1_EDIN
167	2	EDIN2	siCAV1_EDIN
168	2	EDIN2	siCAV1_EDIN
169	2	EDIN2	siCAV1_EDIN
170	2	EDIN2	siCAV1_EDIN
171	2	EDIN2	siCAV1_EDIN
172	2	EDIN2	siCAV1_EDIN
173	2	EDIN2	siCAV1_EDIN
174	2	EDIN2	siCAV1_EDIN
175	2	EDIN2	siCAV1_EDIN
161	2	EDIN3	siCAV1_EDIN
162	2	EDIN3	siCAV1_EDIN
163	2	EDIN3	siCAV1_EDIN
164	2	EDIN3	siCAV1_EDIN
165	2	EDIN3	siCAV1_EDIN
166	2	EDIN3	siCAV1_EDIN
167	2	EDIN3	siCAV1_EDIN
168	2	EDIN3	siCAV1_EDIN
169	2	EDIN3	siCAV1_EDIN
170	2	EDIN3	siCAV1_EDIN
171	2	EDIN3	siCAV1_EDIN
172	2	EDIN3	siCAV1_EDIN
173	2	EDIN3	siCAV1_EDIN
174	2	EDIN3	siCAV1_EDIN
147	2	EDIN4	siCAV1_EDIN
148	2	EDIN4	siCAV1_EDIN
149	2	EDIN4	siCAV1_EDIN
150	2	EDIN4	siCAV1_EDIN
151	2	EDIN4	siCAV1_EDIN
152	2	EDIN4	siCAV1_EDIN
153	2	EDIN4	siCAV1_EDIN
154	2	EDIN4	siCAV1_EDIN
155	2	EDIN4	siCAV1_EDIN
156	2	EDIN4	siCAV1_EDIN
157	2	EDIN4	siCAV1_EDIN
158	2	EDIN4	siCAV1_EDIN
159	2	EDIN4	siCAV1_EDIN
160	2	EDIN4	siCAV1_EDIN
161	2	EDIN4	siCAV1_EDIN
139	2	EDIN5	siCAV1_EDIN
140	2	EDIN5	siCAV1_EDIN
141	2	EDIN5	siCAV1_EDIN
142	2	EDIN5	siCAV1_EDIN
143	2	EDIN5	siCAV1_EDIN
144	2	EDIN5	siCAV1_EDIN
145	2	EDIN5	siCAV1_EDIN
146	2	EDIN5	siCAV1_EDIN
147	2	EDIN5	siCAV1_EDIN
148	2	EDIN5	siCAV1_EDIN
149	2	EDIN5	siCAV1_EDIN
150	2	EDIN5	siCAV1_EDIN
151	2	EDIN5	siCAV1_EDIN
188	3	EDIN1	siCAV1_EDIN
189	3	EDIN1	siCAV1_EDIN
190	3	EDIN1	siCAV1_EDIN
191	3	EDIN1	siCAV1_EDIN
192	3	EDIN1	siCAV1_EDIN
176	3	EDIN2	siCAV1_EDIN
177	3	EDIN2	siCAV1_EDIN
178	3	EDIN2	siCAV1_EDIN
179	3	EDIN2	siCAV1_EDIN
180	3	EDIN2	siCAV1_EDIN
181	3	EDIN2	siCAV1_EDIN
175	3	EDIN3	siCAV1_EDIN
176	3	EDIN3	siCAV1_EDIN
177	3	EDIN3	siCAV1_EDIN
178	3	EDIN3	siCAV1_EDIN
179	3	EDIN3	siCAV1_EDIN
180	3	EDIN3	siCAV1_EDIN
181	3	EDIN3	siCAV1_EDIN
162	3	EDIN4	siCAV1_EDIN
163	3	EDIN4	siCAV1_EDIN
164	3	EDIN4	siCAV1_EDIN
165	3	EDIN4	siCAV1_EDIN
152	3	EDIN5	siCAV1_EDIN
153	3	EDIN5	siCAV1_EDIN
154	3	EDIN5	siCAV1_EDIN
155	3	EDIN5	siCAV1_EDIN
156	3	EDIN5	siCAV1_EDIN
157	3	EDIN5	siCAV1_EDIN
158	3	EDIN5	siCAV1_EDIN
159	3	EDIN5	siCAV1_EDIN
160	3	EDIN5	siCAV1_EDIN
161	3	EDIN5	siCAV1_EDIN
193	4	EDIN1	siCAV1_EDIN
194	4	EDIN1	siCAV1_EDIN
195	4	EDIN1	siCAV1_EDIN
196	4	EDIN1	siCAV1_EDIN
182	4	EDIN2	siCAV1_EDIN
183	4	EDIN2	siCAV1_EDIN
184	4	EDIN2	siCAV1_EDIN
185	4	EDIN2	siCAV1_EDIN
186	4	EDIN2	siCAV1_EDIN
187	4	EDIN2	siCAV1_EDIN
188	4	EDIN2	siCAV1_EDIN
182	4	EDIN3	siCAV1_EDIN
183	4	EDIN3	siCAV1_EDIN
184	4	EDIN3	siCAV1_EDIN
185	4	EDIN3	siCAV1_EDIN
186	4	EDIN3	siCAV1_EDIN
187	4	EDIN3	siCAV1_EDIN
188	4	EDIN3	siCAV1_EDIN
189	4	EDIN3	siCAV1_EDIN
166	4	EDIN4	siCAV1_EDIN
167	4	EDIN4	siCAV1_EDIN
168	4	EDIN4	siCAV1_EDIN
169	4	EDIN4	siCAV1_EDIN
170	4	EDIN4	siCAV1_EDIN
162	4	EDIN5	siCAV1_EDIN
163	4	EDIN5	siCAV1_EDIN
164	4	EDIN5	siCAV1_EDIN
165	4	EDIN5	siCAV1_EDIN
166	4	EDIN5	siCAV1_EDIN
197	5	EDIN1	siCAV1_EDIN
198	5	EDIN1	siCAV1_EDIN
189	5	EDIN2	siCAV1_EDIN
190	5	EDIN2	siCAV1_EDIN
191	5	EDIN2	siCAV1_EDIN
190	5	EDIN3	siCAV1_EDIN
191	5	EDIN3	siCAV1_EDIN
192	5	EDIN3	siCAV1_EDIN
193	5	EDIN3	siCAV1_EDIN
171	5	EDIN4	siCAV1_EDIN
172	5	EDIN4	siCAV1_EDIN
173	5	EDIN4	siCAV1_EDIN
174	5	EDIN4	siCAV1_EDIN
175	5	EDIN4	siCAV1_EDIN
176	5	EDIN4	siCAV1_EDIN
177	5	EDIN4	siCAV1_EDIN
178	5	EDIN4	siCAV1_EDIN
167	5	EDIN5	siCAV1_EDIN
168	5	EDIN5	siCAV1_EDIN
169	5	EDIN5	siCAV1_EDIN
170	5	EDIN5	siCAV1_EDIN
171	5	EDIN5	siCAV1_EDIN
172	5	EDIN5	siCAV1_EDIN
199	6	EDIN1	siCAV1_EDIN
192	6	EDIN2	siCAV1_EDIN
193	6	EDIN2	siCAV1_EDIN
194	6	EDIN2	siCAV1_EDIN
195	6	EDIN2	siCAV1_EDIN
194	6	EDIN3	siCAV1_EDIN
195	6	EDIN3	siCAV1_EDIN
179	6	EDIN4	siCAV1_EDIN
180	6	EDIN4	siCAV1_EDIN
181	6	EDIN4	siCAV1_EDIN
182	6	EDIN4	siCAV1_EDIN
183	6	EDIN4	siCAV1_EDIN
173	6	EDIN5	siCAV1_EDIN
174	6	EDIN5	siCAV1_EDIN
175	6	EDIN5	siCAV1_EDIN
176	6	EDIN5	siCAV1_EDIN
177	6	EDIN5	siCAV1_EDIN
178	6	EDIN5	siCAV1_EDIN
179	6	EDIN5	siCAV1_EDIN
180	6	EDIN5	siCAV1_EDIN
196	7	EDIN2	siCAV1_EDIN
196	7	EDIN3	siCAV1_EDIN
184	7	EDIN4	siCAV1_EDIN
185	7	EDIN4	siCAV1_EDIN
181	7	EDIN5	siCAV1_EDIN
182	7	EDIN5	siCAV1_EDIN
183	7	EDIN5	siCAV1_EDIN
184	7	EDIN5	siCAV1_EDIN
185	7	EDIN5	siCAV1_EDIN
197	8	EDIN2	siCAV1_EDIN
186	8	EDIN4	siCAV1_EDIN
186	8	EDIN5	siCAV1_EDIN
187	8	EDIN5	siCAV1_EDIN
200	9	EDIN1	siCAV1_EDIN
197	9	EDIN3	siCAV1_EDIN
187	9	EDIN4	siCAV1_EDIN
188	9	EDIN4	siCAV1_EDIN
198	10	EDIN3	siCAV1_EDIN
199	10	EDIN3	siCAV1_EDIN
200	10	EDIN3	siCAV1_EDIN
188	10	EDIN5	siCAV1_EDIN
189	10	EDIN5	siCAV1_EDIN
190	11	EDIN5	siCAV1_EDIN
191	12	EDIN5	siCAV1_EDIN
192	13	EDIN5	siCAV1_EDIN
193	13	EDIN5	siCAV1_EDIN
194	15	EDIN5	siCAV1_EDIN
195	15	EDIN5	siCAV1_EDIN
196	20	EDIN5	siCAV1_EDIN
197	20	EDIN5	siCAV1_EDIN
189	22	EDIN4	siCAV1_EDIN
198	25	EDIN5	siCAV1_EDIN
199	30	EDIN5	siCAV1_EDIN
198	40	EDIN2	siCAV1_EDIN
155	1	EDIN4	siCavin1_EDIN
156	1	EDIN4	siCavin1_EDIN
157	1	EDIN4	siCavin1_EDIN
158	1	EDIN4	siCavin1_EDIN
159	1	EDIN4	siCavin1_EDIN
160	1	EDIN4	siCavin1_EDIN
161	1	EDIN4	siCavin1_EDIN
162	1	EDIN4	siCavin1_EDIN
163	1	EDIN4	siCavin1_EDIN
164	1	EDIN4	siCavin1_EDIN
165	1	EDIN4	siCavin1_EDIN
166	1	EDIN4	siCavin1_EDIN
167	1	EDIN4	siCavin1_EDIN
144	1	EDIN5	siCavin1_EDIN
145	1	EDIN5	siCavin1_EDIN
146	1	EDIN5	siCavin1_EDIN
147	1	EDIN5	siCavin1_EDIN
148	1	EDIN5	siCavin1_EDIN
149	1	EDIN5	siCavin1_EDIN
150	1	EDIN5	siCavin1_EDIN
151	1	EDIN5	siCavin1_EDIN
152	1	EDIN5	siCavin1_EDIN
153	1	EDIN5	siCavin1_EDIN
154	1	EDIN5	siCavin1_EDIN
155	1	EDIN5	siCavin1_EDIN
156	1	EDIN5	siCavin1_EDIN
157	1	EDIN5	siCavin1_EDIN
158	1	EDIN5	siCavin1_EDIN
159	1	EDIN5	siCavin1_EDIN
160	1	EDIN5	siCavin1_EDIN
161	1	EDIN5	siCavin1_EDIN
162	1	EDIN5	siCavin1_EDIN
163	1	EDIN5	siCavin1_EDIN
164	1	EDIN5	siCavin1_EDIN
165	1	EDIN5	siCavin1_EDIN
166	1	EDIN5	siCavin1_EDIN
167	1	EDIN5	siCavin1_EDIN
182	2	EDIN1	siCavin1_EDIN
183	2	EDIN1	siCavin1_EDIN
184	2	EDIN1	siCavin1_EDIN
185	2	EDIN1	siCavin1_EDIN
186	2	EDIN1	siCavin1_EDIN
187	2	EDIN1	siCavin1_EDIN
188	2	EDIN1	siCavin1_EDIN
189	2	EDIN1	siCavin1_EDIN
190	2	EDIN1	siCavin1_EDIN
160	2	EDIN2	siCavin1_EDIN
161	2	EDIN2	siCavin1_EDIN
162	2	EDIN2	siCavin1_EDIN
163	2	EDIN2	siCavin1_EDIN
164	2	EDIN2	siCavin1_EDIN
165	2	EDIN2	siCavin1_EDIN
166	2	EDIN2	siCavin1_EDIN
167	2	EDIN2	siCavin1_EDIN
168	2	EDIN2	siCavin1_EDIN
169	2	EDIN2	siCavin1_EDIN
170	2	EDIN2	siCavin1_EDIN
171	2	EDIN2	siCavin1_EDIN
172	2	EDIN2	siCavin1_EDIN
173	2	EDIN2	siCavin1_EDIN
174	2	EDIN2	siCavin1_EDIN
175	2	EDIN2	siCavin1_EDIN
163	2	EDIN3	siCavin1_EDIN
164	2	EDIN3	siCavin1_EDIN
165	2	EDIN3	siCavin1_EDIN
166	2	EDIN3	siCavin1_EDIN
167	2	EDIN3	siCavin1_EDIN
168	2	EDIN3	siCavin1_EDIN
169	2	EDIN3	siCavin1_EDIN
170	2	EDIN3	siCavin1_EDIN
171	2	EDIN3	siCavin1_EDIN
172	2	EDIN3	siCavin1_EDIN
173	2	EDIN3	siCavin1_EDIN
174	2	EDIN3	siCavin1_EDIN
175	2	EDIN3	siCavin1_EDIN
176	2	EDIN3	siCavin1_EDIN
177	2	EDIN3	siCavin1_EDIN
168	2	EDIN4	siCavin1_EDIN
169	2	EDIN4	siCavin1_EDIN
170	2	EDIN4	siCavin1_EDIN
171	2	EDIN4	siCavin1_EDIN
172	2	EDIN4	siCavin1_EDIN
173	2	EDIN4	siCavin1_EDIN
174	2	EDIN4	siCavin1_EDIN
175	2	EDIN4	siCavin1_EDIN
176	2	EDIN4	siCavin1_EDIN
177	2	EDIN4	siCavin1_EDIN
178	2	EDIN4	siCavin1_EDIN
179	2	EDIN4	siCavin1_EDIN
180	2	EDIN4	siCavin1_EDIN
181	2	EDIN4	siCavin1_EDIN
182	2	EDIN4	siCavin1_EDIN
183	2	EDIN4	siCavin1_EDIN
184	2	EDIN4	siCavin1_EDIN
168	2	EDIN5	siCavin1_EDIN
169	2	EDIN5	siCavin1_EDIN
170	2	EDIN5	siCavin1_EDIN
171	2	EDIN5	siCavin1_EDIN
172	2	EDIN5	siCavin1_EDIN
173	2	EDIN5	siCavin1_EDIN
174	2	EDIN5	siCavin1_EDIN
175	2	EDIN5	siCavin1_EDIN
176	2	EDIN5	siCavin1_EDIN
177	2	EDIN5	siCavin1_EDIN
178	2	EDIN5	siCavin1_EDIN
179	2	EDIN5	siCavin1_EDIN
191	3	EDIN1	siCavin1_EDIN
192	3	EDIN1	siCavin1_EDIN
193	3	EDIN1	siCavin1_EDIN
194	3	EDIN1	siCavin1_EDIN
195	3	EDIN1	siCavin1_EDIN
196	3	EDIN1	siCavin1_EDIN
176	3	EDIN2	siCavin1_EDIN
177	3	EDIN2	siCavin1_EDIN
178	3	EDIN2	siCavin1_EDIN
179	3	EDIN2	siCavin1_EDIN
180	3	EDIN2	siCavin1_EDIN
181	3	EDIN2	siCavin1_EDIN
178	3	EDIN3	siCavin1_EDIN
179	3	EDIN3	siCavin1_EDIN
180	3	EDIN3	siCavin1_EDIN
181	3	EDIN3	siCavin1_EDIN
182	3	EDIN3	siCavin1_EDIN
183	3	EDIN3	siCavin1_EDIN
184	3	EDIN3	siCavin1_EDIN
185	3	EDIN3	siCavin1_EDIN
186	3	EDIN3	siCavin1_EDIN
185	3	EDIN4	siCavin1_EDIN
186	3	EDIN4	siCavin1_EDIN
180	3	EDIN5	siCavin1_EDIN
181	3	EDIN5	siCavin1_EDIN
182	3	EDIN5	siCavin1_EDIN
183	3	EDIN5	siCavin1_EDIN
184	3	EDIN5	siCavin1_EDIN
185	3	EDIN5	siCavin1_EDIN
186	3	EDIN5	siCavin1_EDIN
197	4	EDIN1	siCavin1_EDIN
198	4	EDIN1	siCavin1_EDIN
199	4	EDIN1	siCavin1_EDIN
182	4	EDIN2	siCavin1_EDIN
183	4	EDIN2	siCavin1_EDIN
184	4	EDIN2	siCavin1_EDIN
187	4	EDIN3	siCavin1_EDIN
188	4	EDIN3	siCavin1_EDIN
189	4	EDIN3	siCavin1_EDIN
190	4	EDIN3	siCavin1_EDIN
187	4	EDIN4	siCavin1_EDIN
188	4	EDIN4	siCavin1_EDIN
189	4	EDIN4	siCavin1_EDIN
190	4	EDIN4	siCavin1_EDIN
191	4	EDIN4	siCavin1_EDIN
187	4	EDIN5	siCavin1_EDIN
188	4	EDIN5	siCavin1_EDIN
189	4	EDIN5	siCavin1_EDIN
190	4	EDIN5	siCavin1_EDIN
191	4	EDIN5	siCavin1_EDIN
192	4	EDIN5	siCavin1_EDIN
185	5	EDIN2	siCavin1_EDIN
186	5	EDIN2	siCavin1_EDIN
187	5	EDIN2	siCavin1_EDIN
188	5	EDIN2	siCavin1_EDIN
189	5	EDIN2	siCavin1_EDIN
190	5	EDIN2	siCavin1_EDIN
191	5	EDIN2	siCavin1_EDIN
191	5	EDIN3	siCavin1_EDIN
192	5	EDIN3	siCavin1_EDIN
193	5	EDIN3	siCavin1_EDIN
194	5	EDIN3	siCavin1_EDIN
192	5	EDIN4	siCavin1_EDIN
193	5	EDIN4	siCavin1_EDIN
194	5	EDIN4	siCavin1_EDIN
192	6	EDIN2	siCavin1_EDIN
193	6	EDIN2	siCavin1_EDIN
194	6	EDIN2	siCavin1_EDIN
195	6	EDIN3	siCavin1_EDIN
196	6	EDIN3	siCavin1_EDIN
193	6	EDIN5	siCavin1_EDIN
194	6	EDIN5	siCavin1_EDIN
195	6	EDIN5	siCavin1_EDIN
196	6	EDIN5	siCavin1_EDIN
195	7	EDIN2	siCavin1_EDIN
196	7	EDIN2	siCavin1_EDIN
195	7	EDIN4	siCavin1_EDIN
200	8	EDIN1	siCavin1_EDIN
197	8	EDIN3	siCavin1_EDIN
197	8	EDIN5	siCavin1_EDIN
198	9	EDIN3	siCavin1_EDIN
196	9	EDIN4	siCavin1_EDIN
197	9	EDIN4	siCavin1_EDIN
197	10	EDIN2	siCavin1_EDIN
198	10	EDIN4	siCavin1_EDIN
199	11	EDIN3	siCavin1_EDIN
198	11	EDIN5	siCavin1_EDIN
198	12	EDIN2	siCavin1_EDIN
200	12	EDIN3	siCavin1_EDIN
199	12	EDIN5	siCavin1_EDIN
199	14	EDIN4	siCavin1_EDIN
200	15	EDIN4	siCavin1_EDIN
199	16	EDIN2	siCavin1_EDIN
200	17	EDIN5	siCavin1_EDIN
