# Supplementary material for: Caveolin-1 protects endothelial cells from extensive expansion of transcellular tunnel by stiffening the plasma membrane
Source: eLife. 2024 Mar 22;12:RP92078. doi: 10.7554/eLife.92078 (PMC10959525; doi:10.7554/eLife.92078)
Supplement: Figure 1—figure supplement 3—source data 2. [file elife-92078-fig1-figsupp3-data2.xlsx]

## Sheet: B
Condition	Prop_presence	SD_Prop_presence
siCTRL	0.157	0.0115044
siFLNA	0.197	0.0125774

## Sheet: B - raw
Cell.ID	Experience	Condition	TEM
1	ABP 2	siFLNA	1
2	ABP 2	siFLNA	1
3	ABP 2	siFLNA	1
4	ABP 2	siFLNA	1
5	ABP 2	siFLNA	1
6	ABP 2	siFLNA	1
7	ABP 2	siFLNA	1
8	ABP 2	siFLNA	1
9	ABP 2	siFLNA	1
10	ABP 2	siFLNA	1
11	ABP 2	siFLNA	1
12	ABP 2	siFLNA	1
13	ABP 2	siFLNA	1
14	ABP 2	siFLNA	1
15	ABP 2	siFLNA	1
16	ABP 2	siFLNA	1
17	ABP 2	siFLNA	1
18	ABP 2	siFLNA	1
19	ABP 2	siFLNA	1
20	ABP 2	siFLNA	1
21	ABP 2	siFLNA	1
22	ABP 2	siFLNA	1
23	ABP 2	siFLNA	1
24	ABP 2	siFLNA	1
25	ABP 2	siFLNA	1
26	ABP 2	siFLNA	1
27	ABP 2	siFLNA	1
28	ABP 2	siFLNA	0
29	ABP 2	siFLNA	0
30	ABP 2	siFLNA	0
31	ABP 2	siFLNA	0
32	ABP 2	siFLNA	0
33	ABP 2	siFLNA	0
34	ABP 2	siFLNA	0
35	ABP 2	siFLNA	0
36	ABP 2	siFLNA	0
37	ABP 2	siFLNA	0
38	ABP 2	siFLNA	0
39	ABP 2	siFLNA	0
40	ABP 2	siFLNA	0
41	ABP 2	siFLNA	0
42	ABP 2	siFLNA	0
43	ABP 2	siFLNA	0
44	ABP 2	siFLNA	0
45	ABP 2	siFLNA	0
46	ABP 2	siFLNA	0
47	ABP 2	siFLNA	0
48	ABP 2	siFLNA	0
49	ABP 2	siFLNA	0
50	ABP 2	siFLNA	0
51	ABP 2	siFLNA	0
52	ABP 2	siFLNA	0
53	ABP 2	siFLNA	0
54	ABP 2	siFLNA	0
55	ABP 2	siFLNA	0
56	ABP 2	siFLNA	0
57	ABP 2	siFLNA	0
58	ABP 2	siFLNA	0
59	ABP 2	siFLNA	0
60	ABP 2	siFLNA	0
61	ABP 2	siFLNA	0
62	ABP 2	siFLNA	0
63	ABP 2	siFLNA	0
64	ABP 2	siFLNA	0
65	ABP 2	siFLNA	0
66	ABP 2	siFLNA	0
67	ABP 2	siFLNA	0
68	ABP 2	siFLNA	0
69	ABP 2	siFLNA	0
70	ABP 2	siFLNA	0
71	ABP 2	siFLNA	0
72	ABP 2	siFLNA	0
73	ABP 2	siFLNA	0
74	ABP 2	siFLNA	0
75	ABP 2	siFLNA	0
76	ABP 2	siFLNA	0
77	ABP 2	siFLNA	0
78	ABP 2	siFLNA	0
79	ABP 2	siFLNA	0
80	ABP 2	siFLNA	0
81	ABP 2	siFLNA	0
82	ABP 2	siFLNA	0
83	ABP 2	siFLNA	0
84	ABP 2	siFLNA	0
85	ABP 2	siFLNA	0
86	ABP 2	siFLNA	0
87	ABP 2	siFLNA	0
88	ABP 2	siFLNA	0
89	ABP 2	siFLNA	0
90	ABP 2	siFLNA	0
91	ABP 2	siFLNA	0
92	ABP 2	siFLNA	0
93	ABP 2	siFLNA	0
94	ABP 2	siFLNA	0
95	ABP 2	siFLNA	0
96	ABP 2	siFLNA	0
97	ABP 2	siFLNA	0
98	ABP 2	siFLNA	0
99	ABP 2	siFLNA	0
100	ABP 2	siFLNA	0
101	ABP 2	siFLNA	0
102	ABP 2	siFLNA	0
103	ABP 2	siFLNA	0
104	ABP 2	siFLNA	0
105	ABP 2	siFLNA	0
106	ABP 2	siFLNA	0
107	ABP 2	siFLNA	0
108	ABP 2	siFLNA	0
109	ABP 2	siFLNA	0
110	ABP 2	siFLNA	0
111	ABP 2	siFLNA	0
112	ABP 2	siFLNA	0
113	ABP 2	siFLNA	0
114	ABP 2	siFLNA	0
115	ABP 2	siFLNA	0
116	ABP 2	siFLNA	0
117	ABP 2	siFLNA	0
118	ABP 2	siFLNA	0
119	ABP 2	siFLNA	0
120	ABP 2	siFLNA	0
121	ABP 2	siFLNA	0
122	ABP 2	siFLNA	0
123	ABP 2	siFLNA	0
124	ABP 2	siFLNA	0
125	ABP 2	siFLNA	0
126	ABP 2	siFLNA	0
127	ABP 2	siFLNA	0
128	ABP 2	siFLNA	0
129	ABP 2	siFLNA	0
130	ABP 2	siFLNA	0
131	ABP 2	siFLNA	0
132	ABP 2	siFLNA	0
133	ABP 2	siFLNA	0
134	ABP 2	siFLNA	0
135	ABP 2	siFLNA	0
136	ABP 2	siFLNA	0
137	ABP 2	siFLNA	0
138	ABP 2	siFLNA	0
139	ABP 2	siFLNA	0
140	ABP 2	siFLNA	0
141	ABP 2	siFLNA	0
142	ABP 2	siFLNA	0
143	ABP 2	siFLNA	0
144	ABP 2	siFLNA	0
145	ABP 2	siFLNA	0
146	ABP 2	siFLNA	0
147	ABP 2	siFLNA	0
148	ABP 2	siFLNA	0
149	ABP 2	siFLNA	0
150	ABP 2	siFLNA	0
151	ABP 2	siFLNA	0
152	ABP 2	siFLNA	0
153	ABP 2	siFLNA	0
154	ABP 2	siFLNA	0
155	ABP 2	siFLNA	0
156	ABP 2	siFLNA	0
157	ABP 2	siFLNA	0
158	ABP 2	siFLNA	0
159	ABP 2	siFLNA	0
160	ABP 2	siFLNA	0
161	ABP 2	siFLNA	0
162	ABP 2	siFLNA	0
163	ABP 2	siFLNA	0
164	ABP 2	siFLNA	0
165	ABP 2	siFLNA	0
166	ABP 2	siFLNA	0
167	ABP 2	siFLNA	0
168	ABP 2	siFLNA	0
169	ABP 2	siFLNA	0
170	ABP 2	siFLNA	0
171	ABP 2	siFLNA	0
172	ABP 2	siFLNA	0
173	ABP 2	siFLNA	0
174	ABP 2	siFLNA	0
175	ABP 2	siFLNA	0
176	ABP 2	siFLNA	0
177	ABP 2	siFLNA	0
178	ABP 2	siFLNA	0
179	ABP 2	siFLNA	0
180	ABP 2	siFLNA	0
181	ABP 2	siFLNA	0
182	ABP 2	siFLNA	0
183	ABP 2	siFLNA	0
184	ABP 2	siFLNA	0
185	ABP 2	siFLNA	0
186	ABP 2	siFLNA	0
187	ABP 2	siFLNA	0
188	ABP 2	siFLNA	0
189	ABP 2	siFLNA	0
190	ABP 2	siFLNA	0
191	ABP 2	siFLNA	0
192	ABP 2	siFLNA	0
193	ABP 2	siFLNA	0
194	ABP 2	siFLNA	0
195	ABP 2	siFLNA	0
196	ABP 2	siFLNA	0
197	ABP 2	siFLNA	0
198	ABP 2	siFLNA	0
199	ABP 2	siFLNA	0
200	ABP 2	siFLNA	0
1	ABP 2	siCTRL	1
2	ABP 2	siCTRL	1
3	ABP 2	siCTRL	1
4	ABP 2	siCTRL	1
5	ABP 2	siCTRL	1
6	ABP 2	siCTRL	1
7	ABP 2	siCTRL	1
8	ABP 2	siCTRL	1
9	ABP 2	siCTRL	1
10	ABP 2	siCTRL	1
11	ABP 2	siCTRL	1
12	ABP 2	siCTRL	1
13	ABP 2	siCTRL	1
14	ABP 2	siCTRL	1
15	ABP 2	siCTRL	1
16	ABP 2	siCTRL	1
17	ABP 2	siCTRL	1
18	ABP 2	siCTRL	1
19	ABP 2	siCTRL	1
20	ABP 2	siCTRL	1
21	ABP 2	siCTRL	1
22	ABP 2	siCTRL	1
23	ABP 2	siCTRL	1
24	ABP 2	siCTRL	1
25	ABP 2	siCTRL	1
26	ABP 2	siCTRL	1
27	ABP 2	siCTRL	1
28	ABP 2	siCTRL	1
29	ABP 2	siCTRL	1
30	ABP 2	siCTRL	1
31	ABP 2	siCTRL	1
32	ABP 2	siCTRL	0
33	ABP 2	siCTRL	0
34	ABP 2	siCTRL	0
35	ABP 2	siCTRL	0
36	ABP 2	siCTRL	0
37	ABP 2	siCTRL	0
38	ABP 2	siCTRL	0
39	ABP 2	siCTRL	0
40	ABP 2	siCTRL	0
41	ABP 2	siCTRL	0
42	ABP 2	siCTRL	0
43	ABP 2	siCTRL	0
44	ABP 2	siCTRL	0
45	ABP 2	siCTRL	0
46	ABP 2	siCTRL	0
47	ABP 2	siCTRL	0
48	ABP 2	siCTRL	0
49	ABP 2	siCTRL	0
50	ABP 2	siCTRL	0
51	ABP 2	siCTRL	0
52	ABP 2	siCTRL	0
53	ABP 2	siCTRL	0
54	ABP 2	siCTRL	0
55	ABP 2	siCTRL	0
56	ABP 2	siCTRL	0
57	ABP 2	siCTRL	0
58	ABP 2	siCTRL	0
59	ABP 2	siCTRL	0
60	ABP 2	siCTRL	0
61	ABP 2	siCTRL	0
62	ABP 2	siCTRL	0
63	ABP 2	siCTRL	0
64	ABP 2	siCTRL	0
65	ABP 2	siCTRL	0
66	ABP 2	siCTRL	0
67	ABP 2	siCTRL	0
68	ABP 2	siCTRL	0
69	ABP 2	siCTRL	0
70	ABP 2	siCTRL	0
71	ABP 2	siCTRL	0
72	ABP 2	siCTRL	0
73	ABP 2	siCTRL	0
74	ABP 2	siCTRL	0
75	ABP 2	siCTRL	0
76	ABP 2	siCTRL	0
77	ABP 2	siCTRL	0
78	ABP 2	siCTRL	0
79	ABP 2	siCTRL	0
80	ABP 2	siCTRL	0
81	ABP 2	siCTRL	0
82	ABP 2	siCTRL	0
83	ABP 2	siCTRL	0
84	ABP 2	siCTRL	0
85	ABP 2	siCTRL	0
86	ABP 2	siCTRL	0
87	ABP 2	siCTRL	0
88	ABP 2	siCTRL	0
89	ABP 2	siCTRL	0
90	ABP 2	siCTRL	0
91	ABP 2	siCTRL	0
92	ABP 2	siCTRL	0
93	ABP 2	siCTRL	0
94	ABP 2	siCTRL	0
95	ABP 2	siCTRL	0
96	ABP 2	siCTRL	0
97	ABP 2	siCTRL	0
98	ABP 2	siCTRL	0
99	ABP 2	siCTRL	0
100	ABP 2	siCTRL	0
101	ABP 2	siCTRL	0
102	ABP 2	siCTRL	0
103	ABP 2	siCTRL	0
104	ABP 2	siCTRL	0
105	ABP 2	siCTRL	0
106	ABP 2	siCTRL	0
107	ABP 2	siCTRL	0
108	ABP 2	siCTRL	0
109	ABP 2	siCTRL	0
110	ABP 2	siCTRL	0
111	ABP 2	siCTRL	0
112	ABP 2	siCTRL	0
113	ABP 2	siCTRL	0
114	ABP 2	siCTRL	0
115	ABP 2	siCTRL	0
116	ABP 2	siCTRL	0
117	ABP 2	siCTRL	0
118	ABP 2	siCTRL	0
119	ABP 2	siCTRL	0
120	ABP 2	siCTRL	0
121	ABP 2	siCTRL	0
122	ABP 2	siCTRL	0
123	ABP 2	siCTRL	0
124	ABP 2	siCTRL	0
125	ABP 2	siCTRL	0
126	ABP 2	siCTRL	0
127	ABP 2	siCTRL	0
128	ABP 2	siCTRL	0
129	ABP 2	siCTRL	0
130	ABP 2	siCTRL	0
131	ABP 2	siCTRL	0
132	ABP 2	siCTRL	0
133	ABP 2	siCTRL	0
134	ABP 2	siCTRL	0
135	ABP 2	siCTRL	0
136	ABP 2	siCTRL	0
137	ABP 2	siCTRL	0
138	ABP 2	siCTRL	0
139	ABP 2	siCTRL	0
140	ABP 2	siCTRL	0
141	ABP 2	siCTRL	0
142	ABP 2	siCTRL	0
143	ABP 2	siCTRL	0
144	ABP 2	siCTRL	0
145	ABP 2	siCTRL	0
146	ABP 2	siCTRL	0
147	ABP 2	siCTRL	0
148	ABP 2	siCTRL	0
149	ABP 2	siCTRL	0
150	ABP 2	siCTRL	0
151	ABP 2	siCTRL	0
152	ABP 2	siCTRL	0
153	ABP 2	siCTRL	0
154	ABP 2	siCTRL	0
155	ABP 2	siCTRL	0
156	ABP 2	siCTRL	0
157	ABP 2	siCTRL	0
158	ABP 2	siCTRL	0
159	ABP 2	siCTRL	0
160	ABP 2	siCTRL	0
161	ABP 2	siCTRL	0
162	ABP 2	siCTRL	0
163	ABP 2	siCTRL	0
164	ABP 2	siCTRL	0
165	ABP 2	siCTRL	0
166	ABP 2	siCTRL	0
167	ABP 2	siCTRL	0
168	ABP 2	siCTRL	0
169	ABP 2	siCTRL	0
170	ABP 2	siCTRL	0
171	ABP 2	siCTRL	0
172	ABP 2	siCTRL	0
173	ABP 2	siCTRL	0
174	ABP 2	siCTRL	0
175	ABP 2	siCTRL	0
176	ABP 2	siCTRL	0
177	ABP 2	siCTRL	0
178	ABP 2	siCTRL	0
179	ABP 2	siCTRL	0
180	ABP 2	siCTRL	0
181	ABP 2	siCTRL	0
182	ABP 2	siCTRL	0
183	ABP 2	siCTRL	0
184	ABP 2	siCTRL	0
185	ABP 2	siCTRL	0
186	ABP 2	siCTRL	0
187	ABP 2	siCTRL	0
188	ABP 2	siCTRL	0
189	ABP 2	siCTRL	0
190	ABP 2	siCTRL	0
191	ABP 2	siCTRL	0
192	ABP 2	siCTRL	0
193	ABP 2	siCTRL	0
194	ABP 2	siCTRL	0
195	ABP 2	siCTRL	0
196	ABP 2	siCTRL	0
197	ABP 2	siCTRL	0
198	ABP 2	siCTRL	0
199	ABP 2	siCTRL	0
200	ABP 2	siCTRL	0
1	ABP 2	siEHD2	0
2	ABP 2	siEHD2	0
3	ABP 2	siEHD2	0
4	ABP 2	siEHD2	0
5	ABP 2	siEHD2	0
6	ABP 2	siEHD2	0
7	ABP 2	siEHD2	0
8	ABP 2	siEHD2	0
9	ABP 2	siEHD2	0
10	ABP 2	siEHD2	0
11	ABP 2	siEHD2	0
12	ABP 2	siEHD2	0
13	ABP 2	siEHD2	0
14	ABP 2	siEHD2	0
15	ABP 2	siEHD2	0
16	ABP 2	siEHD2	0
17	ABP 2	siEHD2	0
18	ABP 2	siEHD2	0
19	ABP 2	siEHD2	0
20	ABP 2	siEHD2	0
21	ABP 2	siEHD2	0
22	ABP 2	siEHD2	0
23	ABP 2	siEHD2	0
24	ABP 2	siEHD2	0
25	ABP 2	siEHD2	0
26	ABP 2	siEHD2	0
27	ABP 2	siEHD2	0
28	ABP 2	siEHD2	0
29	ABP 2	siEHD2	0
30	ABP 2	siEHD2	0
31	ABP 2	siEHD2	0
32	ABP 2	siEHD2	0
33	ABP 2	siEHD2	0
34	ABP 2	siEHD2	0
35	ABP 2	siEHD2	0
36	ABP 2	siEHD2	0
37	ABP 2	siEHD2	0
38	ABP 2	siEHD2	0
39	ABP 2	siEHD2	0
40	ABP 2	siEHD2	0
41	ABP 2	siEHD2	0
42	ABP 2	siEHD2	0
43	ABP 2	siEHD2	0
44	ABP 2	siEHD2	0
45	ABP 2	siEHD2	0
46	ABP 2	siEHD2	0
47	ABP 2	siEHD2	0
48	ABP 2	siEHD2	0
49	ABP 2	siEHD2	0
50	ABP 2	siEHD2	0
51	ABP 2	siEHD2	0
52	ABP 2	siEHD2	0
53	ABP 2	siEHD2	0
54	ABP 2	siEHD2	0
55	ABP 2	siEHD2	0
56	ABP 2	siEHD2	0
57	ABP 2	siEHD2	0
58	ABP 2	siEHD2	0
59	ABP 2	siEHD2	0
60	ABP 2	siEHD2	0
61	ABP 2	siEHD2	0
62	ABP 2	siEHD2	0
63	ABP 2	siEHD2	0
64	ABP 2	siEHD2	0
65	ABP 2	siEHD2	0
66	ABP 2	siEHD2	0
67	ABP 2	siEHD2	0
68	ABP 2	siEHD2	0
69	ABP 2	siEHD2	0
70	ABP 2	siEHD2	0
71	ABP 2	siEHD2	0
72	ABP 2	siEHD2	0
73	ABP 2	siEHD2	0
74	ABP 2	siEHD2	0
75	ABP 2	siEHD2	0
76	ABP 2	siEHD2	0
77	ABP 2	siEHD2	0
78	ABP 2	siEHD2	0
79	ABP 2	siEHD2	0
80	ABP 2	siEHD2	0
81	ABP 2	siEHD2	0
82	ABP 2	siEHD2	0
83	ABP 2	siEHD2	0
84	ABP 2	siEHD2	0
85	ABP 2	siEHD2	0
86	ABP 2	siEHD2	0
87	ABP 2	siEHD2	0
88	ABP 2	siEHD2	0
89	ABP 2	siEHD2	0
90	ABP 2	siEHD2	0
91	ABP 2	siEHD2	0
92	ABP 2	siEHD2	0
93	ABP 2	siEHD2	0
94	ABP 2	siEHD2	0
95	ABP 2	siEHD2	0
96	ABP 2	siEHD2	0
97	ABP 2	siEHD2	0
98	ABP 2	siEHD2	0
99	ABP 2	siEHD2	0
100	ABP 2	siEHD2	0
101	ABP 2	siEHD2	0
102	ABP 2	siEHD2	0
103	ABP 2	siEHD2	0
104	ABP 2	siEHD2	0
105	ABP 2	siEHD2	0
106	ABP 2	siEHD2	0
107	ABP 2	siEHD2	0
108	ABP 2	siEHD2	0
109	ABP 2	siEHD2	0
110	ABP 2	siEHD2	0
111	ABP 2	siEHD2	0
112	ABP 2	siEHD2	0
113	ABP 2	siEHD2	0
114	ABP 2	siEHD2	0
115	ABP 2	siEHD2	0
116	ABP 2	siEHD2	0
117	ABP 2	siEHD2	0
118	ABP 2	siEHD2	0
119	ABP 2	siEHD2	0
120	ABP 2	siEHD2	0
121	ABP 2	siEHD2	0
122	ABP 2	siEHD2	0
123	ABP 2	siEHD2	0
124	ABP 2	siEHD2	0
125	ABP 2	siEHD2	0
126	ABP 2	siEHD2	0
127	ABP 2	siEHD2	0
128	ABP 2	siEHD2	0
129	ABP 2	siEHD2	0
130	ABP 2	siEHD2	0
131	ABP 2	siEHD2	0
132	ABP 2	siEHD2	0
133	ABP 2	siEHD2	0
134	ABP 2	siEHD2	0
135	ABP 2	siEHD2	0
136	ABP 2	siEHD2	0
137	ABP 2	siEHD2	0
138	ABP 2	siEHD2	0
139	ABP 2	siEHD2	0
140	ABP 2	siEHD2	0
141	ABP 2	siEHD2	0
142	ABP 2	siEHD2	0
143	ABP 2	siEHD2	0
144	ABP 2	siEHD2	0
145	ABP 2	siEHD2	0
146	ABP 2	siEHD2	0
147	ABP 2	siEHD2	0
148	ABP 2	siEHD2	0
149	ABP 2	siEHD2	0
150	ABP 2	siEHD2	0
151	ABP 2	siEHD2	0
152	ABP 2	siEHD2	0
153	ABP 2	siEHD2	0
154	ABP 2	siEHD2	0
155	ABP 2	siEHD2	0
156	ABP 2	siEHD2	0
157	ABP 2	siEHD2	0
158	ABP 2	siEHD2	0
159	ABP 2	siEHD2	0
160	ABP 2	siEHD2	0
161	ABP 2	siEHD2	0
162	ABP 2	siEHD2	0
163	ABP 2	siEHD2	0
164	ABP 2	siEHD2	1
165	ABP 2	siEHD2	1
166	ABP 2	siEHD2	1
167	ABP 2	siEHD2	1
168	ABP 2	siEHD2	1
169	ABP 2	siEHD2	1
170	ABP 2	siEHD2	1
171	ABP 2	siEHD2	1
172	ABP 2	siEHD2	1
173	ABP 2	siEHD2	1
174	ABP 2	siEHD2	1
175	ABP 2	siEHD2	1
176	ABP 2	siEHD2	1
177	ABP 2	siEHD2	1
178	ABP 2	siEHD2	1
179	ABP 2	siEHD2	1
180	ABP 2	siEHD2	1
181	ABP 2	siEHD2	1
182	ABP 2	siEHD2	1
183	ABP 2	siEHD2	1
184	ABP 2	siEHD2	1
185	ABP 2	siEHD2	1
186	ABP 2	siEHD2	1
187	ABP 2	siEHD2	1
188	ABP 2	siEHD2	1
189	ABP 2	siEHD2	1
190	ABP 2	siEHD2	1
191	ABP 2	siEHD2	1
192	ABP 2	siEHD2	1
193	ABP 2	siEHD2	1
194	ABP 2	siEHD2	1
195	ABP 2	siEHD2	1
196	ABP 2	siEHD2	1
197	ABP 2	siEHD2	1
198	ABP 2	siEHD2	1
199	ABP 2	siEHD2	1
200	ABP 2	siEHD2	1
1	ABP 3	siFLNA	1
2	ABP 3	siFLNA	1
3	ABP 3	siFLNA	1
4	ABP 3	siFLNA	1
5	ABP 3	siFLNA	1
6	ABP 3	siFLNA	1
7	ABP 3	siFLNA	1
8	ABP 3	siFLNA	1
9	ABP 3	siFLNA	1
10	ABP 3	siFLNA	1
11	ABP 3	siFLNA	1
12	ABP 3	siFLNA	1
13	ABP 3	siFLNA	1
14	ABP 3	siFLNA	1
15	ABP 3	siFLNA	1
16	ABP 3	siFLNA	1
17	ABP 3	siFLNA	1
18	ABP 3	siFLNA	1
19	ABP 3	siFLNA	1
20	ABP 3	siFLNA	1
21	ABP 3	siFLNA	1
22	ABP 3	siFLNA	1
23	ABP 3	siFLNA	1
24	ABP 3	siFLNA	1
25	ABP 3	siFLNA	1
26	ABP 3	siFLNA	1
27	ABP 3	siFLNA	1
28	ABP 3	siFLNA	1
29	ABP 3	siFLNA	1
30	ABP 3	siFLNA	1
31	ABP 3	siFLNA	1
32	ABP 3	siFLNA	1
33	ABP 3	siFLNA	1
34	ABP 3	siFLNA	1
35	ABP 3	siFLNA	1
36	ABP 3	siFLNA	1
37	ABP 3	siFLNA	1
38	ABP 3	siFLNA	1
39	ABP 3	siFLNA	1
40	ABP 3	siFLNA	0
41	ABP 3	siFLNA	0
42	ABP 3	siFLNA	0
43	ABP 3	siFLNA	0
44	ABP 3	siFLNA	0
45	ABP 3	siFLNA	0
46	ABP 3	siFLNA	0
47	ABP 3	siFLNA	0
48	ABP 3	siFLNA	0
49	ABP 3	siFLNA	0
50	ABP 3	siFLNA	0
51	ABP 3	siFLNA	0
52	ABP 3	siFLNA	0
53	ABP 3	siFLNA	0
54	ABP 3	siFLNA	0
55	ABP 3	siFLNA	0
56	ABP 3	siFLNA	0
57	ABP 3	siFLNA	0
58	ABP 3	siFLNA	0
59	ABP 3	siFLNA	0
60	ABP 3	siFLNA	0
61	ABP 3	siFLNA	0
62	ABP 3	siFLNA	0
63	ABP 3	siFLNA	0
64	ABP 3	siFLNA	0
65	ABP 3	siFLNA	0
66	ABP 3	siFLNA	0
67	ABP 3	siFLNA	0
68	ABP 3	siFLNA	0
69	ABP 3	siFLNA	0
70	ABP 3	siFLNA	0
71	ABP 3	siFLNA	0
72	ABP 3	siFLNA	0
73	ABP 3	siFLNA	0
74	ABP 3	siFLNA	0
75	ABP 3	siFLNA	0
76	ABP 3	siFLNA	0
77	ABP 3	siFLNA	0
78	ABP 3	siFLNA	0
79	ABP 3	siFLNA	0
80	ABP 3	siFLNA	0
81	ABP 3	siFLNA	0
82	ABP 3	siFLNA	0
83	ABP 3	siFLNA	0
84	ABP 3	siFLNA	0
85	ABP 3	siFLNA	0
86	ABP 3	siFLNA	0
87	ABP 3	siFLNA	0
88	ABP 3	siFLNA	0
89	ABP 3	siFLNA	0
90	ABP 3	siFLNA	0
91	ABP 3	siFLNA	0
92	ABP 3	siFLNA	0
93	ABP 3	siFLNA	0
94	ABP 3	siFLNA	0
95	ABP 3	siFLNA	0
96	ABP 3	siFLNA	0
97	ABP 3	siFLNA	0
98	ABP 3	siFLNA	0
99	ABP 3	siFLNA	0
100	ABP 3	siFLNA	0
101	ABP 3	siFLNA	0
102	ABP 3	siFLNA	0
103	ABP 3	siFLNA	0
104	ABP 3	siFLNA	0
105	ABP 3	siFLNA	0
106	ABP 3	siFLNA	0
107	ABP 3	siFLNA	0
108	ABP 3	siFLNA	0
109	ABP 3	siFLNA	0
110	ABP 3	siFLNA	0
111	ABP 3	siFLNA	0
112	ABP 3	siFLNA	0
113	ABP 3	siFLNA	0
114	ABP 3	siFLNA	0
115	ABP 3	siFLNA	0
116	ABP 3	siFLNA	0
117	ABP 3	siFLNA	0
118	ABP 3	siFLNA	0
119	ABP 3	siFLNA	0
120	ABP 3	siFLNA	0
121	ABP 3	siFLNA	0
122	ABP 3	siFLNA	0
123	ABP 3	siFLNA	0
124	ABP 3	siFLNA	0
125	ABP 3	siFLNA	0
126	ABP 3	siFLNA	0
127	ABP 3	siFLNA	0
128	ABP 3	siFLNA	0
129	ABP 3	siFLNA	0
130	ABP 3	siFLNA	0
131	ABP 3	siFLNA	0
132	ABP 3	siFLNA	0
133	ABP 3	siFLNA	0
134	ABP 3	siFLNA	0
135	ABP 3	siFLNA	0
136	ABP 3	siFLNA	0
137	ABP 3	siFLNA	0
138	ABP 3	siFLNA	0
139	ABP 3	siFLNA	0
140	ABP 3	siFLNA	0
141	ABP 3	siFLNA	0
142	ABP 3	siFLNA	0
143	ABP 3	siFLNA	0
144	ABP 3	siFLNA	0
145	ABP 3	siFLNA	0
146	ABP 3	siFLNA	0
147	ABP 3	siFLNA	0
148	ABP 3	siFLNA	0
149	ABP 3	siFLNA	0
150	ABP 3	siFLNA	0
151	ABP 3	siFLNA	0
152	ABP 3	siFLNA	0
153	ABP 3	siFLNA	0
154	ABP 3	siFLNA	0
155	ABP 3	siFLNA	0
156	ABP 3	siFLNA	0
157	ABP 3	siFLNA	0
158	ABP 3	siFLNA	0
159	ABP 3	siFLNA	0
160	ABP 3	siFLNA	0
161	ABP 3	siFLNA	0
162	ABP 3	siFLNA	0
163	ABP 3	siFLNA	0
164	ABP 3	siFLNA	0
165	ABP 3	siFLNA	0
166	ABP 3	siFLNA	0
167	ABP 3	siFLNA	0
168	ABP 3	siFLNA	0
169	ABP 3	siFLNA	0
170	ABP 3	siFLNA	0
171	ABP 3	siFLNA	0
172	ABP 3	siFLNA	0
173	ABP 3	siFLNA	0
174	ABP 3	siFLNA	0
175	ABP 3	siFLNA	0
176	ABP 3	siFLNA	0
177	ABP 3	siFLNA	0
178	ABP 3	siFLNA	0
179	ABP 3	siFLNA	0
180	ABP 3	siFLNA	0
181	ABP 3	siFLNA	0
182	ABP 3	siFLNA	0
183	ABP 3	siFLNA	0
184	ABP 3	siFLNA	0
185	ABP 3	siFLNA	0
186	ABP 3	siFLNA	0
187	ABP 3	siFLNA	0
188	ABP 3	siFLNA	0
189	ABP 3	siFLNA	0
190	ABP 3	siFLNA	0
191	ABP 3	siFLNA	0
192	ABP 3	siFLNA	0
193	ABP 3	siFLNA	0
194	ABP 3	siFLNA	0
195	ABP 3	siFLNA	0
196	ABP 3	siFLNA	0
197	ABP 3	siFLNA	0
198	ABP 3	siFLNA	0
199	ABP 3	siFLNA	0
200	ABP 3	siFLNA	0
1	ABP 3	siCTRL	0
2	ABP 3	siCTRL	0
3	ABP 3	siCTRL	0
4	ABP 3	siCTRL	0
5	ABP 3	siCTRL	0
6	ABP 3	siCTRL	0
7	ABP 3	siCTRL	0
8	ABP 3	siCTRL	0
9	ABP 3	siCTRL	0
10	ABP 3	siCTRL	0
11	ABP 3	siCTRL	0
12	ABP 3	siCTRL	1
13	ABP 3	siCTRL	1
14	ABP 3	siCTRL	1
15	ABP 3	siCTRL	1
16	ABP 3	siCTRL	0
17	ABP 3	siCTRL	0
18	ABP 3	siCTRL	0
19	ABP 3	siCTRL	0
20	ABP 3	siCTRL	0
21	ABP 3	siCTRL	0
22	ABP 3	siCTRL	0
23	ABP 3	siCTRL	0
24	ABP 3	siCTRL	0
25	ABP 3	siCTRL	0
26	ABP 3	siCTRL	1
27	ABP 3	siCTRL	1
28	ABP 3	siCTRL	0
29	ABP 3	siCTRL	0
30	ABP 3	siCTRL	0
31	ABP 3	siCTRL	0
32	ABP 3	siCTRL	0
33	ABP 3	siCTRL	0
34	ABP 3	siCTRL	0
35	ABP 3	siCTRL	0
36	ABP 3	siCTRL	0
37	ABP 3	siCTRL	0
38	ABP 3	siCTRL	0
39	ABP 3	siCTRL	0
40	ABP 3	siCTRL	1
41	ABP 3	siCTRL	1
42	ABP 3	siCTRL	1
43	ABP 3	siCTRL	1
44	ABP 3	siCTRL	1
45	ABP 3	siCTRL	1
46	ABP 3	siCTRL	1
47	ABP 3	siCTRL	1
48	ABP 3	siCTRL	1
49	ABP 3	siCTRL	1
50	ABP 3	siCTRL	1
51	ABP 3	siCTRL	1
52	ABP 3	siCTRL	1
53	ABP 3	siCTRL	1
54	ABP 3	siCTRL	1
55	ABP 3	siCTRL	1
56	ABP 3	siCTRL	1
57	ABP 3	siCTRL	1
58	ABP 3	siCTRL	1
59	ABP 3	siCTRL	1
60	ABP 3	siCTRL	1
61	ABP 3	siCTRL	1
62	ABP 3	siCTRL	1
63	ABP 3	siCTRL	1
64	ABP 3	siCTRL	1
65	ABP 3	siCTRL	0
66	ABP 3	siCTRL	0
67	ABP 3	siCTRL	0
68	ABP 3	siCTRL	0
69	ABP 3	siCTRL	0
70	ABP 3	siCTRL	0
71	ABP 3	siCTRL	0
72	ABP 3	siCTRL	0
73	ABP 3	siCTRL	0
74	ABP 3	siCTRL	0
75	ABP 3	siCTRL	0
76	ABP 3	siCTRL	0
77	ABP 3	siCTRL	0
78	ABP 3	siCTRL	0
79	ABP 3	siCTRL	0
80	ABP 3	siCTRL	0
81	ABP 3	siCTRL	0
82	ABP 3	siCTRL	0
83	ABP 3	siCTRL	0
84	ABP 3	siCTRL	0
85	ABP 3	siCTRL	0
86	ABP 3	siCTRL	0
87	ABP 3	siCTRL	0
88	ABP 3	siCTRL	0
89	ABP 3	siCTRL	0
90	ABP 3	siCTRL	0
91	ABP 3	siCTRL	0
92	ABP 3	siCTRL	0
93	ABP 3	siCTRL	0
94	ABP 3	siCTRL	0
95	ABP 3	siCTRL	0
96	ABP 3	siCTRL	0
97	ABP 3	siCTRL	0
98	ABP 3	siCTRL	0
99	ABP 3	siCTRL	0
100	ABP 3	siCTRL	0
101	ABP 3	siCTRL	0
102	ABP 3	siCTRL	0
103	ABP 3	siCTRL	0
104	ABP 3	siCTRL	0
105	ABP 3	siCTRL	0
106	ABP 3	siCTRL	0
107	ABP 3	siCTRL	0
108	ABP 3	siCTRL	0
109	ABP 3	siCTRL	0
110	ABP 3	siCTRL	0
111	ABP 3	siCTRL	0
112	ABP 3	siCTRL	0
113	ABP 3	siCTRL	0
114	ABP 3	siCTRL	0
115	ABP 3	siCTRL	0
116	ABP 3	siCTRL	0
117	ABP 3	siCTRL	0
118	ABP 3	siCTRL	0
119	ABP 3	siCTRL	0
120	ABP 3	siCTRL	0
121	ABP 3	siCTRL	0
122	ABP 3	siCTRL	0
123	ABP 3	siCTRL	0
124	ABP 3	siCTRL	0
125	ABP 3	siCTRL	0
126	ABP 3	siCTRL	0
127	ABP 3	siCTRL	0
128	ABP 3	siCTRL	0
129	ABP 3	siCTRL	0
130	ABP 3	siCTRL	0
131	ABP 3	siCTRL	0
132	ABP 3	siCTRL	0
133	ABP 3	siCTRL	0
134	ABP 3	siCTRL	0
135	ABP 3	siCTRL	0
136	ABP 3	siCTRL	0
137	ABP 3	siCTRL	0
138	ABP 3	siCTRL	0
139	ABP 3	siCTRL	0
140	ABP 3	siCTRL	0
141	ABP 3	siCTRL	0
142	ABP 3	siCTRL	0
143	ABP 3	siCTRL	0
144	ABP 3	siCTRL	0
145	ABP 3	siCTRL	0
146	ABP 3	siCTRL	0
147	ABP 3	siCTRL	0
148	ABP 3	siCTRL	0
149	ABP 3	siCTRL	0
150	ABP 3	siCTRL	0
151	ABP 3	siCTRL	0
152	ABP 3	siCTRL	0
153	ABP 3	siCTRL	0
154	ABP 3	siCTRL	0
155	ABP 3	siCTRL	0
156	ABP 3	siCTRL	0
157	ABP 3	siCTRL	0
158	ABP 3	siCTRL	0
159	ABP 3	siCTRL	0
160	ABP 3	siCTRL	0
161	ABP 3	siCTRL	0
162	ABP 3	siCTRL	0
163	ABP 3	siCTRL	0
164	ABP 3	siCTRL	0
165	ABP 3	siCTRL	0
166	ABP 3	siCTRL	0
167	ABP 3	siCTRL	0
168	ABP 3	siCTRL	0
169	ABP 3	siCTRL	0
170	ABP 3	siCTRL	0
171	ABP 3	siCTRL	0
172	ABP 3	siCTRL	0
173	ABP 3	siCTRL	0
174	ABP 3	siCTRL	0
175	ABP 3	siCTRL	0
176	ABP 3	siCTRL	0
177	ABP 3	siCTRL	0
178	ABP 3	siCTRL	0
179	ABP 3	siCTRL	0
180	ABP 3	siCTRL	0
181	ABP 3	siCTRL	0
182	ABP 3	siCTRL	0
183	ABP 3	siCTRL	0
184	ABP 3	siCTRL	0
185	ABP 3	siCTRL	0
186	ABP 3	siCTRL	0
187	ABP 3	siCTRL	0
188	ABP 3	siCTRL	0
189	ABP 3	siCTRL	0
190	ABP 3	siCTRL	0
191	ABP 3	siCTRL	0
192	ABP 3	siCTRL	0
193	ABP 3	siCTRL	0
194	ABP 3	siCTRL	0
195	ABP 3	siCTRL	0
196	ABP 3	siCTRL	0
197	ABP 3	siCTRL	0
198	ABP 3	siCTRL	0
199	ABP 3	siCTRL	0
200	ABP 3	siCTRL	0
1	ABP 3	siEHD2	1
2	ABP 3	siEHD2	1
3	ABP 3	siEHD2	0
4	ABP 3	siEHD2	0
5	ABP 3	siEHD2	0
6	ABP 3	siEHD2	0
7	ABP 3	siEHD2	0
8	ABP 3	siEHD2	0
9	ABP 3	siEHD2	0
10	ABP 3	siEHD2	0
11	ABP 3	siEHD2	0
12	ABP 3	siEHD2	0
13	ABP 3	siEHD2	0
14	ABP 3	siEHD2	0
15	ABP 3	siEHD2	1
16	ABP 3	siEHD2	1
17	ABP 3	siEHD2	1
18	ABP 3	siEHD2	1
19	ABP 3	siEHD2	1
20	ABP 3	siEHD2	1
21	ABP 3	siEHD2	0
22	ABP 3	siEHD2	0
23	ABP 3	siEHD2	0
24	ABP 3	siEHD2	0
25	ABP 3	siEHD2	0
26	ABP 3	siEHD2	1
27	ABP 3	siEHD2	1
28	ABP 3	siEHD2	1
29	ABP 3	siEHD2	1
30	ABP 3	siEHD2	1
31	ABP 3	siEHD2	0
32	ABP 3	siEHD2	0
33	ABP 3	siEHD2	0
34	ABP 3	siEHD2	0
35	ABP 3	siEHD2	0
36	ABP 3	siEHD2	0
37	ABP 3	siEHD2	0
38	ABP 3	siEHD2	0
39	ABP 3	siEHD2	0
40	ABP 3	siEHD2	0
41	ABP 3	siEHD2	0
42	ABP 3	siEHD2	1
43	ABP 3	siEHD2	0
44	ABP 3	siEHD2	0
45	ABP 3	siEHD2	1
46	ABP 3	siEHD2	1
47	ABP 3	siEHD2	0
48	ABP 3	siEHD2	1
49	ABP 3	siEHD2	0
50	ABP 3	siEHD2	0
51	ABP 3	siEHD2	0
52	ABP 3	siEHD2	0
53	ABP 3	siEHD2	0
54	ABP 3	siEHD2	0
55	ABP 3	siEHD2	1
56	ABP 3	siEHD2	1
57	ABP 3	siEHD2	1
58	ABP 3	siEHD2	1
59	ABP 3	siEHD2	0
60	ABP 3	siEHD2	0
61	ABP 3	siEHD2	0
62	ABP 3	siEHD2	0
63	ABP 3	siEHD2	0
64	ABP 3	siEHD2	0
65	ABP 3	siEHD2	1
66	ABP 3	siEHD2	1
67	ABP 3	siEHD2	1
68	ABP 3	siEHD2	1
69	ABP 3	siEHD2	1
70	ABP 3	siEHD2	1
71	ABP 3	siEHD2	1
72	ABP 3	siEHD2	1
73	ABP 3	siEHD2	1
74	ABP 3	siEHD2	1
75	ABP 3	siEHD2	1
76	ABP 3	siEHD2	1
77	ABP 3	siEHD2	1
78	ABP 3	siEHD2	1
79	ABP 3	siEHD2	1
80	ABP 3	siEHD2	1
81	ABP 3	siEHD2	1
82	ABP 3	siEHD2	1
83	ABP 3	siEHD2	1
84	ABP 3	siEHD2	1
85	ABP 3	siEHD2	1
86	ABP 3	siEHD2	1
87	ABP 3	siEHD2	1
88	ABP 3	siEHD2	1
89	ABP 3	siEHD2	1
90	ABP 3	siEHD2	1
91	ABP 3	siEHD2	1
92	ABP 3	siEHD2	0
93	ABP 3	siEHD2	0
94	ABP 3	siEHD2	0
95	ABP 3	siEHD2	0
96	ABP 3	siEHD2	0
97	ABP 3	siEHD2	0
98	ABP 3	siEHD2	0
99	ABP 3	siEHD2	0
100	ABP 3	siEHD2	0
101	ABP 3	siEHD2	0
102	ABP 3	siEHD2	0
103	ABP 3	siEHD2	0
104	ABP 3	siEHD2	0
105	ABP 3	siEHD2	0
106	ABP 3	siEHD2	0
107	ABP 3	siEHD2	0
108	ABP 3	siEHD2	0
109	ABP 3	siEHD2	0
110	ABP 3	siEHD2	0
111	ABP 3	siEHD2	0
112	ABP 3	siEHD2	0
113	ABP 3	siEHD2	0
114	ABP 3	siEHD2	0
115	ABP 3	siEHD2	0
116	ABP 3	siEHD2	0
117	ABP 3	siEHD2	0
118	ABP 3	siEHD2	0
119	ABP 3	siEHD2	0
120	ABP 3	siEHD2	0
121	ABP 3	siEHD2	0
122	ABP 3	siEHD2	0
123	ABP 3	siEHD2	0
124	ABP 3	siEHD2	0
125	ABP 3	siEHD2	0
126	ABP 3	siEHD2	0
127	ABP 3	siEHD2	0
128	ABP 3	siEHD2	0
129	ABP 3	siEHD2	0
130	ABP 3	siEHD2	0
131	ABP 3	siEHD2	0
132	ABP 3	siEHD2	0
133	ABP 3	siEHD2	0
134	ABP 3	siEHD2	0
135	ABP 3	siEHD2	0
136	ABP 3	siEHD2	0
137	ABP 3	siEHD2	0
138	ABP 3	siEHD2	0
139	ABP 3	siEHD2	0
140	ABP 3	siEHD2	0
141	ABP 3	siEHD2	0
142	ABP 3	siEHD2	0
143	ABP 3	siEHD2	0
144	ABP 3	siEHD2	0
145	ABP 3	siEHD2	0
146	ABP 3	siEHD2	0
147	ABP 3	siEHD2	0
148	ABP 3	siEHD2	0
149	ABP 3	siEHD2	0
150	ABP 3	siEHD2	0
151	ABP 3	siEHD2	0
152	ABP 3	siEHD2	0
153	ABP 3	siEHD2	0
154	ABP 3	siEHD2	0
155	ABP 3	siEHD2	0
156	ABP 3	siEHD2	0
157	ABP 3	siEHD2	0
158	ABP 3	siEHD2	0
159	ABP 3	siEHD2	0
160	ABP 3	siEHD2	0
161	ABP 3	siEHD2	0
162	ABP 3	siEHD2	0
163	ABP 3	siEHD2	0
164	ABP 3	siEHD2	0
165	ABP 3	siEHD2	0
166	ABP 3	siEHD2	0
167	ABP 3	siEHD2	0
168	ABP 3	siEHD2	0
169	ABP 3	siEHD2	0
170	ABP 3	siEHD2	0
171	ABP 3	siEHD2	0
172	ABP 3	siEHD2	0
173	ABP 3	siEHD2	0
174	ABP 3	siEHD2	0
175	ABP 3	siEHD2	0
176	ABP 3	siEHD2	0
177	ABP 3	siEHD2	0
178	ABP 3	siEHD2	0
179	ABP 3	siEHD2	0
180	ABP 3	siEHD2	0
181	ABP 3	siEHD2	0
182	ABP 3	siEHD2	0
183	ABP 3	siEHD2	0
184	ABP 3	siEHD2	0
185	ABP 3	siEHD2	0
186	ABP 3	siEHD2	0
187	ABP 3	siEHD2	0
188	ABP 3	siEHD2	0
189	ABP 3	siEHD2	0
190	ABP 3	siEHD2	0
191	ABP 3	siEHD2	0
192	ABP 3	siEHD2	0
193	ABP 3	siEHD2	0
194	ABP 3	siEHD2	0
195	ABP 3	siEHD2	0
196	ABP 3	siEHD2	0
197	ABP 3	siEHD2	0
198	ABP 3	siEHD2	0
199	ABP 3	siEHD2	0
200	ABP 3	siEHD2	0
1	ABP 4	siFLNA	1
2	ABP 4	siFLNA	1
3	ABP 4	siFLNA	1
4	ABP 4	siFLNA	1
5	ABP 4	siFLNA	1
6	ABP 4	siFLNA	1
7	ABP 4	siFLNA	1
8	ABP 4	siFLNA	1
9	ABP 4	siFLNA	1
10	ABP 4	siFLNA	1
11	ABP 4	siFLNA	1
12	ABP 4	siFLNA	1
13	ABP 4	siFLNA	1
14	ABP 4	siFLNA	1
15	ABP 4	siFLNA	1
16	ABP 4	siFLNA	1
17	ABP 4	siFLNA	1
18	ABP 4	siFLNA	1
19	ABP 4	siFLNA	1
20	ABP 4	siFLNA	1
21	ABP 4	siFLNA	1
22	ABP 4	siFLNA	1
23	ABP 4	siFLNA	1
24	ABP 4	siFLNA	1
25	ABP 4	siFLNA	1
26	ABP 4	siFLNA	1
27	ABP 4	siFLNA	1
28	ABP 4	siFLNA	1
29	ABP 4	siFLNA	1
30	ABP 4	siFLNA	1
31	ABP 4	siFLNA	1
32	ABP 4	siFLNA	1
33	ABP 4	siFLNA	1
34	ABP 4	siFLNA	1
35	ABP 4	siFLNA	1
36	ABP 4	siFLNA	1
37	ABP 4	siFLNA	1
38	ABP 4	siFLNA	1
39	ABP 4	siFLNA	0
40	ABP 4	siFLNA	0
41	ABP 4	siFLNA	0
42	ABP 4	siFLNA	0
43	ABP 4	siFLNA	0
44	ABP 4	siFLNA	0
45	ABP 4	siFLNA	0
46	ABP 4	siFLNA	0
47	ABP 4	siFLNA	0
48	ABP 4	siFLNA	0
49	ABP 4	siFLNA	0
50	ABP 4	siFLNA	0
51	ABP 4	siFLNA	0
52	ABP 4	siFLNA	0
53	ABP 4	siFLNA	0
54	ABP 4	siFLNA	0
55	ABP 4	siFLNA	0
56	ABP 4	siFLNA	0
57	ABP 4	siFLNA	0
58	ABP 4	siFLNA	0
59	ABP 4	siFLNA	0
60	ABP 4	siFLNA	0
61	ABP 4	siFLNA	0
62	ABP 4	siFLNA	0
63	ABP 4	siFLNA	0
64	ABP 4	siFLNA	0
65	ABP 4	siFLNA	0
66	ABP 4	siFLNA	0
67	ABP 4	siFLNA	0
68	ABP 4	siFLNA	0
69	ABP 4	siFLNA	0
70	ABP 4	siFLNA	0
71	ABP 4	siFLNA	0
72	ABP 4	siFLNA	0
73	ABP 4	siFLNA	0
74	ABP 4	siFLNA	0
75	ABP 4	siFLNA	0
76	ABP 4	siFLNA	0
77	ABP 4	siFLNA	0
78	ABP 4	siFLNA	0
79	ABP 4	siFLNA	0
80	ABP 4	siFLNA	0
81	ABP 4	siFLNA	0
82	ABP 4	siFLNA	0
83	ABP 4	siFLNA	0
84	ABP 4	siFLNA	0
85	ABP 4	siFLNA	0
86	ABP 4	siFLNA	0
87	ABP 4	siFLNA	0
88	ABP 4	siFLNA	0
89	ABP 4	siFLNA	0
90	ABP 4	siFLNA	0
91	ABP 4	siFLNA	0
92	ABP 4	siFLNA	0
93	ABP 4	siFLNA	0
94	ABP 4	siFLNA	0
95	ABP 4	siFLNA	0
96	ABP 4	siFLNA	0
97	ABP 4	siFLNA	0
98	ABP 4	siFLNA	0
99	ABP 4	siFLNA	0
100	ABP 4	siFLNA	0
101	ABP 4	siFLNA	0
102	ABP 4	siFLNA	0
103	ABP 4	siFLNA	0
104	ABP 4	siFLNA	0
105	ABP 4	siFLNA	0
106	ABP 4	siFLNA	0
107	ABP 4	siFLNA	0
108	ABP 4	siFLNA	0
109	ABP 4	siFLNA	0
110	ABP 4	siFLNA	0
111	ABP 4	siFLNA	0
112	ABP 4	siFLNA	0
113	ABP 4	siFLNA	0
114	ABP 4	siFLNA	0
115	ABP 4	siFLNA	0
116	ABP 4	siFLNA	0
117	ABP 4	siFLNA	0
118	ABP 4	siFLNA	0
119	ABP 4	siFLNA	0
120	ABP 4	siFLNA	0
121	ABP 4	siFLNA	0
122	ABP 4	siFLNA	0
123	ABP 4	siFLNA	0
124	ABP 4	siFLNA	0
125	ABP 4	siFLNA	0
126	ABP 4	siFLNA	0
127	ABP 4	siFLNA	0
128	ABP 4	siFLNA	0
129	ABP 4	siFLNA	0
130	ABP 4	siFLNA	0
131	ABP 4	siFLNA	0
132	ABP 4	siFLNA	0
133	ABP 4	siFLNA	0
134	ABP 4	siFLNA	0
135	ABP 4	siFLNA	0
136	ABP 4	siFLNA	0
137	ABP 4	siFLNA	0
138	ABP 4	siFLNA	0
139	ABP 4	siFLNA	0
140	ABP 4	siFLNA	0
141	ABP 4	siFLNA	0
142	ABP 4	siFLNA	0
143	ABP 4	siFLNA	0
144	ABP 4	siFLNA	0
145	ABP 4	siFLNA	0
146	ABP 4	siFLNA	0
147	ABP 4	siFLNA	0
148	ABP 4	siFLNA	0
149	ABP 4	siFLNA	0
150	ABP 4	siFLNA	0
151	ABP 4	siFLNA	0
152	ABP 4	siFLNA	0
153	ABP 4	siFLNA	0
154	ABP 4	siFLNA	0
155	ABP 4	siFLNA	0
156	ABP 4	siFLNA	0
157	ABP 4	siFLNA	0
158	ABP 4	siFLNA	0
159	ABP 4	siFLNA	0
160	ABP 4	siFLNA	0
161	ABP 4	siFLNA	0
162	ABP 4	siFLNA	0
163	ABP 4	siFLNA	0
164	ABP 4	siFLNA	0
165	ABP 4	siFLNA	0
166	ABP 4	siFLNA	0
167	ABP 4	siFLNA	0
168	ABP 4	siFLNA	0
169	ABP 4	siFLNA	0
170	ABP 4	siFLNA	0
171	ABP 4	siFLNA	0
172	ABP 4	siFLNA	0
173	ABP 4	siFLNA	0
174	ABP 4	siFLNA	0
175	ABP 4	siFLNA	0
176	ABP 4	siFLNA	0
177	ABP 4	siFLNA	0
178	ABP 4	siFLNA	0
179	ABP 4	siFLNA	0
180	ABP 4	siFLNA	0
181	ABP 4	siFLNA	0
182	ABP 4	siFLNA	0
183	ABP 4	siFLNA	0
184	ABP 4	siFLNA	0
185	ABP 4	siFLNA	0
186	ABP 4	siFLNA	0
187	ABP 4	siFLNA	0
188	ABP 4	siFLNA	0
189	ABP 4	siFLNA	0
190	ABP 4	siFLNA	0
191	ABP 4	siFLNA	0
192	ABP 4	siFLNA	0
193	ABP 4	siFLNA	0
194	ABP 4	siFLNA	0
195	ABP 4	siFLNA	0
196	ABP 4	siFLNA	0
197	ABP 4	siFLNA	0
198	ABP 4	siFLNA	0
199	ABP 4	siFLNA	0
200	ABP 4	siFLNA	0
1	ABP 4	siCTRL	1
2	ABP 4	siCTRL	0
3	ABP 4	siCTRL	0
4	ABP 4	siCTRL	0
5	ABP 4	siCTRL	1
6	ABP 4	siCTRL	1
7	ABP 4	siCTRL	0
8	ABP 4	siCTRL	1
9	ABP 4	siCTRL	0
10	ABP 4	siCTRL	0
11	ABP 4	siCTRL	0
12	ABP 4	siCTRL	0
13	ABP 4	siCTRL	0
14	ABP 4	siCTRL	0
15	ABP 4	siCTRL	0
16	ABP 4	siCTRL	0
17	ABP 4	siCTRL	0
18	ABP 4	siCTRL	0
19	ABP 4	siCTRL	0
20	ABP 4	siCTRL	0
21	ABP 4	siCTRL	1
22	ABP 4	siCTRL	1
23	ABP 4	siCTRL	0
24	ABP 4	siCTRL	0
25	ABP 4	siCTRL	0
26	ABP 4	siCTRL	0
27	ABP 4	siCTRL	0
28	ABP 4	siCTRL	0
29	ABP 4	siCTRL	0
30	ABP 4	siCTRL	0
31	ABP 4	siCTRL	0
32	ABP 4	siCTRL	0
33	ABP 4	siCTRL	0
34	ABP 4	siCTRL	0
35	ABP 4	siCTRL	0
36	ABP 4	siCTRL	0
37	ABP 4	siCTRL	0
38	ABP 4	siCTRL	0
39	ABP 4	siCTRL	1
40	ABP 4	siCTRL	1
41	ABP 4	siCTRL	1
42	ABP 4	siCTRL	1
43	ABP 4	siCTRL	1
44	ABP 4	siCTRL	1
45	ABP 4	siCTRL	1
46	ABP 4	siCTRL	1
47	ABP 4	siCTRL	1
48	ABP 4	siCTRL	1
49	ABP 4	siCTRL	1
50	ABP 4	siCTRL	1
51	ABP 4	siCTRL	1
52	ABP 4	siCTRL	1
53	ABP 4	siCTRL	1
54	ABP 4	siCTRL	1
55	ABP 4	siCTRL	1
56	ABP 4	siCTRL	1
57	ABP 4	siCTRL	1
58	ABP 4	siCTRL	1
59	ABP 4	siCTRL	1
60	ABP 4	siCTRL	1
61	ABP 4	siCTRL	1
62	ABP 4	siCTRL	1
63	ABP 4	siCTRL	1
64	ABP 4	siCTRL	1
65	ABP 4	siCTRL	0
66	ABP 4	siCTRL	0
67	ABP 4	siCTRL	0
68	ABP 4	siCTRL	0
69	ABP 4	siCTRL	0
70	ABP 4	siCTRL	0
71	ABP 4	siCTRL	0
72	ABP 4	siCTRL	0
73	ABP 4	siCTRL	0
74	ABP 4	siCTRL	0
75	ABP 4	siCTRL	0
76	ABP 4	siCTRL	0
77	ABP 4	siCTRL	0
78	ABP 4	siCTRL	0
79	ABP 4	siCTRL	0
80	ABP 4	siCTRL	0
81	ABP 4	siCTRL	0
82	ABP 4	siCTRL	0
83	ABP 4	siCTRL	0
84	ABP 4	siCTRL	0
85	ABP 4	siCTRL	0
86	ABP 4	siCTRL	0
87	ABP 4	siCTRL	0
88	ABP 4	siCTRL	0
89	ABP 4	siCTRL	0
90	ABP 4	siCTRL	0
91	ABP 4	siCTRL	0
92	ABP 4	siCTRL	0
93	ABP 4	siCTRL	0
94	ABP 4	siCTRL	0
95	ABP 4	siCTRL	0
96	ABP 4	siCTRL	0
97	ABP 4	siCTRL	0
98	ABP 4	siCTRL	0
99	ABP 4	siCTRL	0
100	ABP 4	siCTRL	0
101	ABP 4	siCTRL	0
102	ABP 4	siCTRL	0
103	ABP 4	siCTRL	0
104	ABP 4	siCTRL	0
105	ABP 4	siCTRL	0
106	ABP 4	siCTRL	0
107	ABP 4	siCTRL	0
108	ABP 4	siCTRL	0
109	ABP 4	siCTRL	0
110	ABP 4	siCTRL	0
111	ABP 4	siCTRL	0
112	ABP 4	siCTRL	0
113	ABP 4	siCTRL	0
114	ABP 4	siCTRL	0
115	ABP 4	siCTRL	0
116	ABP 4	siCTRL	0
117	ABP 4	siCTRL	0
118	ABP 4	siCTRL	0
119	ABP 4	siCTRL	0
120	ABP 4	siCTRL	0
121	ABP 4	siCTRL	0
122	ABP 4	siCTRL	0
123	ABP 4	siCTRL	0
124	ABP 4	siCTRL	0
125	ABP 4	siCTRL	0
126	ABP 4	siCTRL	0
127	ABP 4	siCTRL	0
128	ABP 4	siCTRL	0
129	ABP 4	siCTRL	0
130	ABP 4	siCTRL	0
131	ABP 4	siCTRL	0
132	ABP 4	siCTRL	0
133	ABP 4	siCTRL	0
134	ABP 4	siCTRL	0
135	ABP 4	siCTRL	0
136	ABP 4	siCTRL	0
137	ABP 4	siCTRL	0
138	ABP 4	siCTRL	0
139	ABP 4	siCTRL	0
140	ABP 4	siCTRL	0
141	ABP 4	siCTRL	0
142	ABP 4	siCTRL	0
143	ABP 4	siCTRL	0
144	ABP 4	siCTRL	0
145	ABP 4	siCTRL	0
146	ABP 4	siCTRL	0
147	ABP 4	siCTRL	0
148	ABP 4	siCTRL	0
149	ABP 4	siCTRL	0
150	ABP 4	siCTRL	0
151	ABP 4	siCTRL	0
152	ABP 4	siCTRL	0
153	ABP 4	siCTRL	0
154	ABP 4	siCTRL	0
155	ABP 4	siCTRL	0
156	ABP 4	siCTRL	0
157	ABP 4	siCTRL	0
158	ABP 4	siCTRL	0
159	ABP 4	siCTRL	0
160	ABP 4	siCTRL	0
161	ABP 4	siCTRL	0
162	ABP 4	siCTRL	0
163	ABP 4	siCTRL	0
164	ABP 4	siCTRL	0
165	ABP 4	siCTRL	0
166	ABP 4	siCTRL	0
167	ABP 4	siCTRL	0
168	ABP 4	siCTRL	0
169	ABP 4	siCTRL	0
170	ABP 4	siCTRL	0
171	ABP 4	siCTRL	0
172	ABP 4	siCTRL	0
173	ABP 4	siCTRL	0
174	ABP 4	siCTRL	0
175	ABP 4	siCTRL	0
176	ABP 4	siCTRL	0
177	ABP 4	siCTRL	0
178	ABP 4	siCTRL	0
179	ABP 4	siCTRL	0
180	ABP 4	siCTRL	0
181	ABP 4	siCTRL	0
182	ABP 4	siCTRL	0
183	ABP 4	siCTRL	0
184	ABP 4	siCTRL	0
185	ABP 4	siCTRL	0
186	ABP 4	siCTRL	0
187	ABP 4	siCTRL	0
188	ABP 4	siCTRL	0
189	ABP 4	siCTRL	0
190	ABP 4	siCTRL	0
191	ABP 4	siCTRL	0
192	ABP 4	siCTRL	0
193	ABP 4	siCTRL	0
194	ABP 4	siCTRL	0
195	ABP 4	siCTRL	0
196	ABP 4	siCTRL	0
197	ABP 4	siCTRL	0
198	ABP 4	siCTRL	0
199	ABP 4	siCTRL	0
200	ABP 4	siCTRL	0
1	ABP 4	siEHD2	1
2	ABP 4	siEHD2	0
3	ABP 4	siEHD2	0
4	ABP 4	siEHD2	1
5	ABP 4	siEHD2	0
6	ABP 4	siEHD2	0
7	ABP 4	siEHD2	0
8	ABP 4	siEHD2	0
9	ABP 4	siEHD2	0
10	ABP 4	siEHD2	0
11	ABP 4	siEHD2	0
12	ABP 4	siEHD2	0
13	ABP 4	siEHD2	1
14	ABP 4	siEHD2	0
15	ABP 4	siEHD2	0
16	ABP 4	siEHD2	0
17	ABP 4	siEHD2	0
18	ABP 4	siEHD2	0
19	ABP 4	siEHD2	0
20	ABP 4	siEHD2	0
21	ABP 4	siEHD2	0
22	ABP 4	siEHD2	0
23	ABP 4	siEHD2	1
24	ABP 4	siEHD2	1
25	ABP 4	siEHD2	1
26	ABP 4	siEHD2	0
27	ABP 4	siEHD2	0
28	ABP 4	siEHD2	0
29	ABP 4	siEHD2	0
30	ABP 4	siEHD2	0
31	ABP 4	siEHD2	0
32	ABP 4	siEHD2	0
33	ABP 4	siEHD2	0
34	ABP 4	siEHD2	0
35	ABP 4	siEHD2	0
36	ABP 4	siEHD2	0
37	ABP 4	siEHD2	0
38	ABP 4	siEHD2	0
39	ABP 4	siEHD2	0
40	ABP 4	siEHD2	0
41	ABP 4	siEHD2	0
42	ABP 4	siEHD2	0
43	ABP 4	siEHD2	0
44	ABP 4	siEHD2	1
45	ABP 4	siEHD2	0
46	ABP 4	siEHD2	0
47	ABP 4	siEHD2	0
48	ABP 4	siEHD2	0
49	ABP 4	siEHD2	0
50	ABP 4	siEHD2	1
51	ABP 4	siEHD2	1
52	ABP 4	siEHD2	1
53	ABP 4	siEHD2	1
54	ABP 4	siEHD2	1
55	ABP 4	siEHD2	1
56	ABP 4	siEHD2	0
57	ABP 4	siEHD2	0
58	ABP 4	siEHD2	0
59	ABP 4	siEHD2	0
60	ABP 4	siEHD2	0
61	ABP 4	siEHD2	0
62	ABP 4	siEHD2	0
63	ABP 4	siEHD2	0
64	ABP 4	siEHD2	0
65	ABP 4	siEHD2	1
66	ABP 4	siEHD2	1
67	ABP 4	siEHD2	1
68	ABP 4	siEHD2	1
69	ABP 4	siEHD2	1
70	ABP 4	siEHD2	1
71	ABP 4	siEHD2	1
72	ABP 4	siEHD2	1
73	ABP 4	siEHD2	1
74	ABP 4	siEHD2	1
75	ABP 4	siEHD2	1
76	ABP 4	siEHD2	1
77	ABP 4	siEHD2	1
78	ABP 4	siEHD2	1
79	ABP 4	siEHD2	1
80	ABP 4	siEHD2	1
81	ABP 4	siEHD2	1
82	ABP 4	siEHD2	1
83	ABP 4	siEHD2	1
84	ABP 4	siEHD2	1
85	ABP 4	siEHD2	1
86	ABP 4	siEHD2	0
87	ABP 4	siEHD2	0
88	ABP 4	siEHD2	0
89	ABP 4	siEHD2	0
90	ABP 4	siEHD2	0
91	ABP 4	siEHD2	0
92	ABP 4	siEHD2	0
93	ABP 4	siEHD2	0
94	ABP 4	siEHD2	0
95	ABP 4	siEHD2	0
96	ABP 4	siEHD2	0
97	ABP 4	siEHD2	0
98	ABP 4	siEHD2	0
99	ABP 4	siEHD2	0
100	ABP 4	siEHD2	0
101	ABP 4	siEHD2	0
102	ABP 4	siEHD2	0
103	ABP 4	siEHD2	0
104	ABP 4	siEHD2	0
105	ABP 4	siEHD2	0
106	ABP 4	siEHD2	0
107	ABP 4	siEHD2	0
108	ABP 4	siEHD2	0
109	ABP 4	siEHD2	0
110	ABP 4	siEHD2	0
111	ABP 4	siEHD2	0
112	ABP 4	siEHD2	0
113	ABP 4	siEHD2	0
114	ABP 4	siEHD2	0
115	ABP 4	siEHD2	0
116	ABP 4	siEHD2	0
117	ABP 4	siEHD2	0
118	ABP 4	siEHD2	0
119	ABP 4	siEHD2	0
120	ABP 4	siEHD2	0
121	ABP 4	siEHD2	0
122	ABP 4	siEHD2	0
123	ABP 4	siEHD2	0
124	ABP 4	siEHD2	0
125	ABP 4	siEHD2	0
126	ABP 4	siEHD2	0
127	ABP 4	siEHD2	0
128	ABP 4	siEHD2	0
129	ABP 4	siEHD2	0
130	ABP 4	siEHD2	0
131	ABP 4	siEHD2	0
132	ABP 4	siEHD2	0
133	ABP 4	siEHD2	0
134	ABP 4	siEHD2	0
135	ABP 4	siEHD2	0
136	ABP 4	siEHD2	0
137	ABP 4	siEHD2	0
138	ABP 4	siEHD2	0
139	ABP 4	siEHD2	0
140	ABP 4	siEHD2	0
141	ABP 4	siEHD2	0
142	ABP 4	siEHD2	0
143	ABP 4	siEHD2	0
144	ABP 4	siEHD2	0
145	ABP 4	siEHD2	0
146	ABP 4	siEHD2	0
147	ABP 4	siEHD2	0
148	ABP 4	siEHD2	0
149	ABP 4	siEHD2	0
150	ABP 4	siEHD2	0
151	ABP 4	siEHD2	0
152	ABP 4	siEHD2	0
153	ABP 4	siEHD2	0
154	ABP 4	siEHD2	0
155	ABP 4	siEHD2	0
156	ABP 4	siEHD2	0
157	ABP 4	siEHD2	0
158	ABP 4	siEHD2	0
159	ABP 4	siEHD2	0
160	ABP 4	siEHD2	0
161	ABP 4	siEHD2	0
162	ABP 4	siEHD2	0
163	ABP 4	siEHD2	0
164	ABP 4	siEHD2	0
165	ABP 4	siEHD2	0
166	ABP 4	siEHD2	0
167	ABP 4	siEHD2	0
168	ABP 4	siEHD2	0
169	ABP 4	siEHD2	0
170	ABP 4	siEHD2	0
171	ABP 4	siEHD2	0
172	ABP 4	siEHD2	0
173	ABP 4	siEHD2	0
174	ABP 4	siEHD2	0
175	ABP 4	siEHD2	0
176	ABP 4	siEHD2	0
177	ABP 4	siEHD2	0
178	ABP 4	siEHD2	0
179	ABP 4	siEHD2	0
180	ABP 4	siEHD2	0
181	ABP 4	siEHD2	0
182	ABP 4	siEHD2	0
183	ABP 4	siEHD2	0
184	ABP 4	siEHD2	0
185	ABP 4	siEHD2	0
186	ABP 4	siEHD2	0
187	ABP 4	siEHD2	0
188	ABP 4	siEHD2	0
189	ABP 4	siEHD2	0
190	ABP 4	siEHD2	0
191	ABP 4	siEHD2	0
192	ABP 4	siEHD2	0
193	ABP 4	siEHD2	0
194	ABP 4	siEHD2	0
195	ABP 4	siEHD2	0
196	ABP 4	siEHD2	0
197	ABP 4	siEHD2	0
198	ABP 4	siEHD2	0
199	ABP 4	siEHD2	0
200	ABP 4	siEHD2	0
1	ABP 5	siFLNA	1
2	ABP 5	siFLNA	0
3	ABP 5	siFLNA	0
4	ABP 5	siFLNA	0
5	ABP 5	siFLNA	0
6	ABP 5	siFLNA	0
7	ABP 5	siFLNA	0
8	ABP 5	siFLNA	0
9	ABP 5	siFLNA	0
10	ABP 5	siFLNA	0
11	ABP 5	siFLNA	0
12	ABP 5	siFLNA	0
13	ABP 5	siFLNA	1
14	ABP 5	siFLNA	0
15	ABP 5	siFLNA	0
16	ABP 5	siFLNA	0
17	ABP 5	siFLNA	0
18	ABP 5	siFLNA	0
19	ABP 5	siFLNA	1
20	ABP 5	siFLNA	0
21	ABP 5	siFLNA	0
22	ABP 5	siFLNA	0
23	ABP 5	siFLNA	0
24	ABP 5	siFLNA	0
25	ABP 5	siFLNA	0
26	ABP 5	siFLNA	0
27	ABP 5	siFLNA	0
28	ABP 5	siFLNA	0
29	ABP 5	siFLNA	0
30	ABP 5	siFLNA	0
31	ABP 5	siFLNA	0
32	ABP 5	siFLNA	0
33	ABP 5	siFLNA	0
34	ABP 5	siFLNA	0
35	ABP 5	siFLNA	0
36	ABP 5	siFLNA	0
37	ABP 5	siFLNA	0
38	ABP 5	siFLNA	0
39	ABP 5	siFLNA	0
40	ABP 5	siFLNA	0
41	ABP 5	siFLNA	0
42	ABP 5	siFLNA	0
43	ABP 5	siFLNA	0
44	ABP 5	siFLNA	0
45	ABP 5	siFLNA	0
46	ABP 5	siFLNA	1
47	ABP 5	siFLNA	1
48	ABP 5	siFLNA	1
49	ABP 5	siFLNA	1
50	ABP 5	siFLNA	1
51	ABP 5	siFLNA	1
52	ABP 5	siFLNA	1
53	ABP 5	siFLNA	1
54	ABP 5	siFLNA	1
55	ABP 5	siFLNA	1
56	ABP 5	siFLNA	1
57	ABP 5	siFLNA	1
58	ABP 5	siFLNA	1
59	ABP 5	siFLNA	1
60	ABP 5	siFLNA	1
61	ABP 5	siFLNA	1
62	ABP 5	siFLNA	1
63	ABP 5	siFLNA	1
64	ABP 5	siFLNA	1
65	ABP 5	siFLNA	1
66	ABP 5	siFLNA	1
67	ABP 5	siFLNA	1
68	ABP 5	siFLNA	1
69	ABP 5	siFLNA	1
70	ABP 5	siFLNA	1
71	ABP 5	siFLNA	1
72	ABP 5	siFLNA	1
73	ABP 5	siFLNA	1
74	ABP 5	siFLNA	1
75	ABP 5	siFLNA	1
76	ABP 5	siFLNA	1
77	ABP 5	siFLNA	1
78	ABP 5	siFLNA	1
79	ABP 5	siFLNA	1
80	ABP 5	siFLNA	0
81	ABP 5	siFLNA	0
82	ABP 5	siFLNA	0
83	ABP 5	siFLNA	0
84	ABP 5	siFLNA	0
85	ABP 5	siFLNA	0
86	ABP 5	siFLNA	0
87	ABP 5	siFLNA	0
88	ABP 5	siFLNA	0
89	ABP 5	siFLNA	0
90	ABP 5	siFLNA	0
91	ABP 5	siFLNA	0
92	ABP 5	siFLNA	0
93	ABP 5	siFLNA	0
94	ABP 5	siFLNA	0
95	ABP 5	siFLNA	0
96	ABP 5	siFLNA	0
97	ABP 5	siFLNA	0
98	ABP 5	siFLNA	0
99	ABP 5	siFLNA	0
100	ABP 5	siFLNA	0
101	ABP 5	siFLNA	0
102	ABP 5	siFLNA	0
103	ABP 5	siFLNA	0
104	ABP 5	siFLNA	0
105	ABP 5	siFLNA	0
106	ABP 5	siFLNA	0
107	ABP 5	siFLNA	0
108	ABP 5	siFLNA	0
109	ABP 5	siFLNA	0
110	ABP 5	siFLNA	0
111	ABP 5	siFLNA	0
112	ABP 5	siFLNA	0
113	ABP 5	siFLNA	0
114	ABP 5	siFLNA	0
115	ABP 5	siFLNA	0
116	ABP 5	siFLNA	0
117	ABP 5	siFLNA	0
118	ABP 5	siFLNA	0
119	ABP 5	siFLNA	0
120	ABP 5	siFLNA	0
121	ABP 5	siFLNA	0
122	ABP 5	siFLNA	0
123	ABP 5	siFLNA	0
124	ABP 5	siFLNA	0
125	ABP 5	siFLNA	0
126	ABP 5	siFLNA	0
127	ABP 5	siFLNA	0
128	ABP 5	siFLNA	0
129	ABP 5	siFLNA	0
130	ABP 5	siFLNA	0
131	ABP 5	siFLNA	0
132	ABP 5	siFLNA	0
133	ABP 5	siFLNA	0
134	ABP 5	siFLNA	0
135	ABP 5	siFLNA	0
136	ABP 5	siFLNA	0
137	ABP 5	siFLNA	0
138	ABP 5	siFLNA	0
139	ABP 5	siFLNA	0
140	ABP 5	siFLNA	0
141	ABP 5	siFLNA	0
142	ABP 5	siFLNA	0
143	ABP 5	siFLNA	0
144	ABP 5	siFLNA	0
145	ABP 5	siFLNA	0
146	ABP 5	siFLNA	0
147	ABP 5	siFLNA	0
148	ABP 5	siFLNA	0
149	ABP 5	siFLNA	0
150	ABP 5	siFLNA	0
151	ABP 5	siFLNA	0
152	ABP 5	siFLNA	0
153	ABP 5	siFLNA	0
154	ABP 5	siFLNA	0
155	ABP 5	siFLNA	0
156	ABP 5	siFLNA	0
157	ABP 5	siFLNA	0
158	ABP 5	siFLNA	0
159	ABP 5	siFLNA	0
160	ABP 5	siFLNA	0
161	ABP 5	siFLNA	0
162	ABP 5	siFLNA	0
163	ABP 5	siFLNA	0
164	ABP 5	siFLNA	0
165	ABP 5	siFLNA	0
166	ABP 5	siFLNA	0
167	ABP 5	siFLNA	0
168	ABP 5	siFLNA	0
169	ABP 5	siFLNA	0
170	ABP 5	siFLNA	0
171	ABP 5	siFLNA	0
172	ABP 5	siFLNA	0
173	ABP 5	siFLNA	0
174	ABP 5	siFLNA	0
175	ABP 5	siFLNA	0
176	ABP 5	siFLNA	0
177	ABP 5	siFLNA	0
178	ABP 5	siFLNA	0
179	ABP 5	siFLNA	0
180	ABP 5	siFLNA	0
181	ABP 5	siFLNA	0
182	ABP 5	siFLNA	0
183	ABP 5	siFLNA	0
184	ABP 5	siFLNA	0
185	ABP 5	siFLNA	0
186	ABP 5	siFLNA	0
187	ABP 5	siFLNA	0
188	ABP 5	siFLNA	0
189	ABP 5	siFLNA	0
190	ABP 5	siFLNA	0
191	ABP 5	siFLNA	0
192	ABP 5	siFLNA	0
193	ABP 5	siFLNA	0
194	ABP 5	siFLNA	0
195	ABP 5	siFLNA	0
196	ABP 5	siFLNA	0
197	ABP 5	siFLNA	0
198	ABP 5	siFLNA	0
199	ABP 5	siFLNA	0
[truncated: 1,001 more rows]

## Sheet: C
Cell.ID	Number.of.TEM	Experience	Condition
1	4	ABP 2	siFLNA
2	2	ABP 2	siFLNA
3	2	ABP 2	siFLNA
4	2	ABP 2	siFLNA
5	2	ABP 2	siFLNA
6	1	ABP 2	siFLNA
7	1	ABP 2	siFLNA
8	1	ABP 2	siFLNA
9	1	ABP 2	siFLNA
10	1	ABP 2	siFLNA
11	1	ABP 2	siFLNA
12	1	ABP 2	siFLNA
13	1	ABP 2	siFLNA
14	1	ABP 2	siFLNA
15	1	ABP 2	siFLNA
16	1	ABP 2	siFLNA
17	1	ABP 2	siFLNA
18	1	ABP 2	siFLNA
19	1	ABP 2	siFLNA
20	1	ABP 2	siFLNA
21	1	ABP 2	siFLNA
22	1	ABP 2	siFLNA
23	1	ABP 2	siFLNA
24	1	ABP 2	siFLNA
25	1	ABP 2	siFLNA
26	1	ABP 2	siFLNA
27	1	ABP 2	siFLNA
1	12	ABP 2	siCTRL
2	2	ABP 2	siCTRL
3	2	ABP 2	siCTRL
4	2	ABP 2	siCTRL
5	2	ABP 2	siCTRL
6	2	ABP 2	siCTRL
7	1	ABP 2	siCTRL
8	1	ABP 2	siCTRL
9	1	ABP 2	siCTRL
10	1	ABP 2	siCTRL
11	1	ABP 2	siCTRL
12	1	ABP 2	siCTRL
13	1	ABP 2	siCTRL
14	1	ABP 2	siCTRL
15	1	ABP 2	siCTRL
16	1	ABP 2	siCTRL
17	1	ABP 2	siCTRL
18	1	ABP 2	siCTRL
19	1	ABP 2	siCTRL
20	1	ABP 2	siCTRL
21	1	ABP 2	siCTRL
22	1	ABP 2	siCTRL
23	1	ABP 2	siCTRL
24	1	ABP 2	siCTRL
25	1	ABP 2	siCTRL
26	1	ABP 2	siCTRL
27	1	ABP 2	siCTRL
28	1	ABP 2	siCTRL
29	1	ABP 2	siCTRL
30	1	ABP 2	siCTRL
31	1	ABP 2	siCTRL
164	1	ABP 2	siEHD2
165	1	ABP 2	siEHD2
166	1	ABP 2	siEHD2
167	1	ABP 2	siEHD2
168	1	ABP 2	siEHD2
169	1	ABP 2	siEHD2
170	1	ABP 2	siEHD2
171	1	ABP 2	siEHD2
172	1	ABP 2	siEHD2
173	1	ABP 2	siEHD2
174	1	ABP 2	siEHD2
175	1	ABP 2	siEHD2
176	1	ABP 2	siEHD2
177	1	ABP 2	siEHD2
178	1	ABP 2	siEHD2
179	1	ABP 2	siEHD2
180	1	ABP 2	siEHD2
181	1	ABP 2	siEHD2
182	2	ABP 2	siEHD2
183	2	ABP 2	siEHD2
184	2	ABP 2	siEHD2
185	2	ABP 2	siEHD2
186	2	ABP 2	siEHD2
187	2	ABP 2	siEHD2
188	2	ABP 2	siEHD2
189	3	ABP 2	siEHD2
190	3	ABP 2	siEHD2
191	3	ABP 2	siEHD2
192	3	ABP 2	siEHD2
193	3	ABP 2	siEHD2
194	4	ABP 2	siEHD2
195	4	ABP 2	siEHD2
196	4	ABP 2	siEHD2
197	5	ABP 2	siEHD2
198	6	ABP 2	siEHD2
199	10	ABP 2	siEHD2
200	16	ABP 2	siEHD2
1	10	ABP 3	siFLNA
2	5	ABP 3	siFLNA
3	5	ABP 3	siFLNA
4	5	ABP 3	siFLNA
5	4	ABP 3	siFLNA
6	4	ABP 3	siFLNA
7	4	ABP 3	siFLNA
8	3	ABP 3	siFLNA
9	3	ABP 3	siFLNA
10	3	ABP 3	siFLNA
11	3	ABP 3	siFLNA
12	2	ABP 3	siFLNA
13	2	ABP 3	siFLNA
14	2	ABP 3	siFLNA
15	2	ABP 3	siFLNA
16	2	ABP 3	siFLNA
17	2	ABP 3	siFLNA
18	2	ABP 3	siFLNA
19	2	ABP 3	siFLNA
20	2	ABP 3	siFLNA
21	2	ABP 3	siFLNA
22	2	ABP 3	siFLNA
23	2	ABP 3	siFLNA
24	2	ABP 3	siFLNA
25	2	ABP 3	siFLNA
26	1	ABP 3	siFLNA
27	1	ABP 3	siFLNA
28	1	ABP 3	siFLNA
29	1	ABP 3	siFLNA
30	1	ABP 3	siFLNA
31	1	ABP 3	siFLNA
32	1	ABP 3	siFLNA
33	1	ABP 3	siFLNA
34	1	ABP 3	siFLNA
35	1	ABP 3	siFLNA
36	1	ABP 3	siFLNA
37	1	ABP 3	siFLNA
38	1	ABP 3	siFLNA
39	1	ABP 3	siFLNA
12	2	ABP 3	siCTRL
13	2	ABP 3	siCTRL
14	2	ABP 3	siCTRL
15	1	ABP 3	siCTRL
26	1	ABP 3	siCTRL
27	1	ABP 3	siCTRL
40	13	ABP 3	siCTRL
41	11	ABP 3	siCTRL
42	7	ABP 3	siCTRL
43	7	ABP 3	siCTRL
44	5	ABP 3	siCTRL
45	4	ABP 3	siCTRL
46	3	ABP 3	siCTRL
47	3	ABP 3	siCTRL
48	2	ABP 3	siCTRL
49	2	ABP 3	siCTRL
50	2	ABP 3	siCTRL
51	2	ABP 3	siCTRL
52	2	ABP 3	siCTRL
53	2	ABP 3	siCTRL
54	2	ABP 3	siCTRL
55	1	ABP 3	siCTRL
56	1	ABP 3	siCTRL
57	1	ABP 3	siCTRL
58	1	ABP 3	siCTRL
59	1	ABP 3	siCTRL
60	1	ABP 3	siCTRL
61	1	ABP 3	siCTRL
62	1	ABP 3	siCTRL
63	1	ABP 3	siCTRL
64	1	ABP 3	siCTRL
1	2	ABP 3	siEHD2
2	3	ABP 3	siEHD2
15	1	ABP 3	siEHD2
16	2	ABP 3	siEHD2
17	1	ABP 3	siEHD2
18	1	ABP 3	siEHD2
19	1	ABP 3	siEHD2
20	1	ABP 3	siEHD2
26	4	ABP 3	siEHD2
27	1	ABP 3	siEHD2
28	10	ABP 3	siEHD2
29	9	ABP 3	siEHD2
30	2	ABP 3	siEHD2
42	3	ABP 3	siEHD2
45	2	ABP 3	siEHD2
46	10	ABP 3	siEHD2
48	5	ABP 3	siEHD2
55	3	ABP 3	siEHD2
56	2	ABP 3	siEHD2
57	2	ABP 3	siEHD2
58	1	ABP 3	siEHD2
65	41	ABP 3	siEHD2
66	12	ABP 3	siEHD2
67	6	ABP 3	siEHD2
68	5	ABP 3	siEHD2
69	4	ABP 3	siEHD2
70	3	ABP 3	siEHD2
71	3	ABP 3	siEHD2
72	3	ABP 3	siEHD2
73	2	ABP 3	siEHD2
74	2	ABP 3	siEHD2
75	2	ABP 3	siEHD2
76	1	ABP 3	siEHD2
77	1	ABP 3	siEHD2
78	1	ABP 3	siEHD2
79	1	ABP 3	siEHD2
80	1	ABP 3	siEHD2
81	1	ABP 3	siEHD2
82	1	ABP 3	siEHD2
83	1	ABP 3	siEHD2
84	1	ABP 3	siEHD2
85	1	ABP 3	siEHD2
86	1	ABP 3	siEHD2
87	1	ABP 3	siEHD2
88	1	ABP 3	siEHD2
89	1	ABP 3	siEHD2
90	1	ABP 3	siEHD2
91	1	ABP 3	siEHD2
1	8	ABP 4	siFLNA
2	8	ABP 4	siFLNA
3	7	ABP 4	siFLNA
4	6	ABP 4	siFLNA
5	5	ABP 4	siFLNA
6	5	ABP 4	siFLNA
7	4	ABP 4	siFLNA
8	3	ABP 4	siFLNA
9	3	ABP 4	siFLNA
10	3	ABP 4	siFLNA
11	3	ABP 4	siFLNA
12	3	ABP 4	siFLNA
13	2	ABP 4	siFLNA
14	2	ABP 4	siFLNA
15	2	ABP 4	siFLNA
16	2	ABP 4	siFLNA
17	2	ABP 4	siFLNA
18	2	ABP 4	siFLNA
19	2	ABP 4	siFLNA
20	2	ABP 4	siFLNA
21	1	ABP 4	siFLNA
22	1	ABP 4	siFLNA
23	1	ABP 4	siFLNA
24	1	ABP 4	siFLNA
25	1	ABP 4	siFLNA
26	1	ABP 4	siFLNA
27	1	ABP 4	siFLNA
28	1	ABP 4	siFLNA
29	1	ABP 4	siFLNA
30	1	ABP 4	siFLNA
31	1	ABP 4	siFLNA
32	1	ABP 4	siFLNA
33	1	ABP 4	siFLNA
34	1	ABP 4	siFLNA
35	1	ABP 4	siFLNA
36	1	ABP 4	siFLNA
37	1	ABP 4	siFLNA
38	1	ABP 4	siFLNA
1	1	ABP 4	siCTRL
5	3	ABP 4	siCTRL
6	1	ABP 4	siCTRL
8	1	ABP 4	siCTRL
21	4	ABP 4	siCTRL
22	2	ABP 4	siCTRL
39	7	ABP 4	siCTRL
40	5	ABP 4	siCTRL
41	5	ABP 4	siCTRL
42	4	ABP 4	siCTRL
43	3	ABP 4	siCTRL
44	2	ABP 4	siCTRL
45	2	ABP 4	siCTRL
46	2	ABP 4	siCTRL
47	2	ABP 4	siCTRL
48	2	ABP 4	siCTRL
49	2	ABP 4	siCTRL
50	1	ABP 4	siCTRL
51	1	ABP 4	siCTRL
52	1	ABP 4	siCTRL
53	1	ABP 4	siCTRL
54	1	ABP 4	siCTRL
55	1	ABP 4	siCTRL
56	1	ABP 4	siCTRL
57	1	ABP 4	siCTRL
58	1	ABP 4	siCTRL
59	1	ABP 4	siCTRL
60	1	ABP 4	siCTRL
61	1	ABP 4	siCTRL
62	1	ABP 4	siCTRL
63	1	ABP 4	siCTRL
64	1	ABP 4	siCTRL
1	2	ABP 4	siEHD2
4	19	ABP 4	siEHD2
13	3	ABP 4	siEHD2
23	3	ABP 4	siEHD2
24	2	ABP 4	siEHD2
25	1	ABP 4	siEHD2
44	7	ABP 4	siEHD2
50	4	ABP 4	siEHD2
51	3	ABP 4	siEHD2
52	3	ABP 4	siEHD2
53	1	ABP 4	siEHD2
54	1	ABP 4	siEHD2
55	1	ABP 4	siEHD2
65	6	ABP 4	siEHD2
66	5	ABP 4	siEHD2
67	4	ABP 4	siEHD2
68	3	ABP 4	siEHD2
69	3	ABP 4	siEHD2
70	3	ABP 4	siEHD2
71	2	ABP 4	siEHD2
72	2	ABP 4	siEHD2
73	2	ABP 4	siEHD2
74	2	ABP 4	siEHD2
75	1	ABP 4	siEHD2
76	1	ABP 4	siEHD2
77	1	ABP 4	siEHD2
78	1	ABP 4	siEHD2
79	1	ABP 4	siEHD2
80	1	ABP 4	siEHD2
81	1	ABP 4	siEHD2
82	1	ABP 4	siEHD2
83	1	ABP 4	siEHD2
84	1	ABP 4	siEHD2
85	1	ABP 4	siEHD2
1	3	ABP 5	siFLNA
13	2	ABP 5	siFLNA
19	1	ABP 5	siFLNA
46	8	ABP 5	siFLNA
47	8	ABP 5	siFLNA
48	7	ABP 5	siFLNA
49	5	ABP 5	siFLNA
50	4	ABP 5	siFLNA
51	4	ABP 5	siFLNA
52	3	ABP 5	siFLNA
53	3	ABP 5	siFLNA
54	3	ABP 5	siFLNA
55	2	ABP 5	siFLNA
56	2	ABP 5	siFLNA
57	2	ABP 5	siFLNA
58	2	ABP 5	siFLNA
59	2	ABP 5	siFLNA
60	2	ABP 5	siFLNA
61	2	ABP 5	siFLNA
62	2	ABP 5	siFLNA
63	1	ABP 5	siFLNA
64	1	ABP 5	siFLNA
65	1	ABP 5	siFLNA
66	1	ABP 5	siFLNA
67	1	ABP 5	siFLNA
68	1	ABP 5	siFLNA
69	1	ABP 5	siFLNA
70	1	ABP 5	siFLNA
71	1	ABP 5	siFLNA
72	1	ABP 5	siFLNA
73	1	ABP 5	siFLNA
74	1	ABP 5	siFLNA
75	1	ABP 5	siFLNA
76	1	ABP 5	siFLNA
77	1	ABP 5	siFLNA
78	1	ABP 5	siFLNA
79	1	ABP 5	siFLNA
8	1	ABP 5	siCTRL
10	1	ABP 5	siCTRL
13	2	ABP 5	siCTRL
14	2	ABP 5	siCTRL
20	2	ABP 5	siCTRL
21	1	ABP 5	siCTRL
46	3	ABP 5	siCTRL
49	2	ABP 5	siCTRL
52	5	ABP 5	siCTRL
55	1	ABP 5	siCTRL
63	1	ABP 5	siCTRL
80	2	ABP 5	siCTRL
81	2	ABP 5	siCTRL
82	2	ABP 5	siCTRL
83	2	ABP 5	siCTRL
84	1	ABP 5	siCTRL
85	1	ABP 5	siCTRL
86	1	ABP 5	siCTRL
87	1	ABP 5	siCTRL
88	1	ABP 5	siCTRL
89	1	ABP 5	siCTRL
90	1	ABP 5	siCTRL
91	1	ABP 5	siCTRL
1	7	ABP 5	siEHD2
2	7	ABP 5	siEHD2
3	5	ABP 5	siEHD2
4	5	ABP 5	siEHD2
5	5	ABP 5	siEHD2
6	5	ABP 5	siEHD2
7	5	ABP 5	siEHD2
8	4	ABP 5	siEHD2
9	4	ABP 5	siEHD2
10	3	ABP 5	siEHD2
11	3	ABP 5	siEHD2
12	3	ABP 5	siEHD2
13	2	ABP 5	siEHD2
14	2	ABP 5	siEHD2
15	2	ABP 5	siEHD2
16	2	ABP 5	siEHD2
17	2	ABP 5	siEHD2
18	2	ABP 5	siEHD2
19	1	ABP 5	siEHD2
20	1	ABP 5	siEHD2
21	1	ABP 5	siEHD2
22	1	ABP 5	siEHD2
23	1	ABP 5	siEHD2
24	1	ABP 5	siEHD2
25	1	ABP 5	siEHD2
26	1	ABP 5	siEHD2
27	1	ABP 5	siEHD2
28	1	ABP 5	siEHD2
29	1	ABP 5	siEHD2
30	1	ABP 5	siEHD2
31	1	ABP 5	siEHD2
32	1	ABP 5	siEHD2
33	1	ABP 5	siEHD2
34	1	ABP 5	siEHD2
35	1	ABP 5	siEHD2
36	1	ABP 5	siEHD2
37	1	ABP 5	siEHD2
38	1	ABP 5	siEHD2
39	1	ABP 5	siEHD2
40	1	ABP 5	siEHD2
41	1	ABP 5	siEHD2
42	1	ABP 5	siEHD2
43	1	ABP 5	siEHD2
44	1	ABP 5	siEHD2
45	1	ABP 5	siEHD2
7	1	ABP 6	siFLNA
13	4	ABP 6	siFLNA
14	2	ABP 6	siFLNA
15	1	ABP 6	siFLNA
16	1	ABP 6	siFLNA
17	1	ABP 6	siFLNA
22	14	ABP 6	siFLNA
23	3	ABP 6	siFLNA
24	3	ABP 6	siFLNA
25	2	ABP 6	siFLNA
41	23	ABP 6	siFLNA
42	15	ABP 6	siFLNA
43	12	ABP 6	siFLNA
44	10	ABP 6	siFLNA
45	7	ABP 6	siFLNA
46	7	ABP 6	siFLNA
47	7	ABP 6	siFLNA
48	6	ABP 6	siFLNA
49	5	ABP 6	siFLNA
50	5	ABP 6	siFLNA
51	4	ABP 6	siFLNA
52	4	ABP 6	siFLNA
53	4	ABP 6	siFLNA
54	4	ABP 6	siFLNA
55	4	ABP 6	siFLNA
56	3	ABP 6	siFLNA
57	3	ABP 6	siFLNA
58	3	ABP 6	siFLNA
59	3	ABP 6	siFLNA
60	2	ABP 6	siFLNA
61	2	ABP 6	siFLNA
62	2	ABP 6	siFLNA
63	2	ABP 6	siFLNA
64	2	ABP 6	siFLNA
65	2	ABP 6	siFLNA
66	2	ABP 6	siFLNA
67	2	ABP 6	siFLNA
68	2	ABP 6	siFLNA
69	2	ABP 6	siFLNA
70	1	ABP 6	siFLNA
71	1	ABP 6	siFLNA
72	1	ABP 6	siFLNA
73	1	ABP 6	siFLNA
74	1	ABP 6	siFLNA
75	1	ABP 6	siFLNA
76	1	ABP 6	siFLNA
77	1	ABP 6	siFLNA
78	1	ABP 6	siFLNA
79	1	ABP 6	siFLNA
80	1	ABP 6	siFLNA
81	1	ABP 6	siFLNA
82	1	ABP 6	siFLNA
83	1	ABP 6	siFLNA
84	1	ABP 6	siFLNA
85	1	ABP 6	siFLNA
86	1	ABP 6	siFLNA
1	14	ABP 6	siCTRL
2	12	ABP 6	siCTRL
3	10	ABP 6	siCTRL
4	7	ABP 6	siCTRL
5	7	ABP 6	siCTRL
6	6	ABP 6	siCTRL
7	5	ABP 6	siCTRL
8	5	ABP 6	siCTRL
9	4	ABP 6	siCTRL
10	4	ABP 6	siCTRL
11	3	ABP 6	siCTRL
12	3	ABP 6	siCTRL
13	2	ABP 6	siCTRL
14	2	ABP 6	siCTRL
15	2	ABP 6	siCTRL
16	2	ABP 6	siCTRL
17	2	ABP 6	siCTRL
18	2	ABP 6	siCTRL
19	2	ABP 6	siCTRL
20	2	ABP 6	siCTRL
21	2	ABP 6	siCTRL
22	1	ABP 6	siCTRL
23	1	ABP 6	siCTRL
24	1	ABP 6	siCTRL
25	1	ABP 6	siCTRL
26	1	ABP 6	siCTRL
27	1	ABP 6	siCTRL
28	1	ABP 6	siCTRL
29	1	ABP 6	siCTRL
30	1	ABP 6	siCTRL
31	1	ABP 6	siCTRL
32	1	ABP 6	siCTRL
33	1	ABP 6	siCTRL
34	1	ABP 6	siCTRL
35	1	ABP 6	siCTRL
36	1	ABP 6	siCTRL
37	1	ABP 6	siCTRL
38	1	ABP 6	siCTRL
39	1	ABP 6	siCTRL
40	1	ABP 6	siCTRL
6	1	ABP 6	siEHD2
8	2	ABP 6	siEHD2
10	1	ABP 6	siEHD2
11	3	ABP 6	siEHD2
12	4	ABP 6	siEHD2
15	2	ABP 6	siEHD2
19	1	ABP 6	siEHD2
23	1	ABP 6	siEHD2
25	1	ABP 6	siEHD2
28	3	ABP 6	siEHD2
29	1	ABP 6	siEHD2
30	1	ABP 6	siEHD2
31	3	ABP 6	siEHD2
32	5	ABP 6	siEHD2
34	1	ABP 6	siEHD2
35	1	ABP 6	siEHD2
36	1	ABP 6	siEHD2
38	2	ABP 6	siEHD2
41	1	ABP 6	siEHD2
42	1	ABP 6	siEHD2
47	1	ABP 6	siEHD2
48	1	ABP 6	siEHD2
52	2	ABP 6	siEHD2
53	2	ABP 6	siEHD2
58	1	ABP 6	siEHD2
60	1	ABP 6	siEHD2
62	9	ABP 6	siEHD2
63	3	ABP 6	siEHD2
70	1	ABP 6	siEHD2
75	2	ABP 6	siEHD2
76	2	ABP 6	siEHD2
78	6	ABP 6	siEHD2
79	1	ABP 6	siEHD2
86	1	ABP 6	siEHD2
88	12	ABP 6	siEHD2
97	1	ABP 6	siEHD2
98	3	ABP 6	siEHD2
101	2	ABP 6	siEHD2
102	1	ABP 6	siEHD2
109	2	ABP 6	siEHD2
111	1	ABP 6	siEHD2
112	1	ABP 6	siEHD2
118	1	ABP 6	siEHD2
119	1	ABP 6	siEHD2
122	1	ABP 6	siEHD2
127	2	ABP 6	siEHD2
128	1	ABP 6	siEHD2
130	1	ABP 6	siEHD2
133	1	ABP 6	siEHD2
134	3	ABP 6	siEHD2
135	1	ABP 6	siEHD2
140	5	ABP 6	siEHD2
142	6	ABP 6	siEHD2
143	1	ABP 6	siEHD2
144	1	ABP 6	siEHD2
145	1	ABP 6	siEHD2
146	8	ABP 6	siEHD2
148	1	ABP 6	siEHD2
152	2	ABP 6	siEHD2
153	1	ABP 6	siEHD2
154	1	ABP 6	siEHD2
155	10	ABP 6	siEHD2
158	2	ABP 6	siEHD2
162	2	ABP 6	siEHD2
166	3	ABP 6	siEHD2
167	4	ABP 6	siEHD2
170	5	ABP 6	siEHD2
173	3	ABP 6	siEHD2
177	1	ABP 6	siEHD2
178	2	ABP 6	siEHD2
182	4	ABP 6	siEHD2
188	1	ABP 6	siEHD2
190	1	ABP 6	siEHD2
196	1	ABP 6	siEHD2
198	1	ABP 6	siEHD2
199	1	ABP 6	siEHD2
