# Supplementary material for: Caveolin-1 protects endothelial cells from extensive expansion of transcellular tunnel by stiffening the plasma membrane
Source: eLife. 2024 Mar 22;12:RP92078. doi: 10.7554/eLife.92078 (PMC10959525; doi:10.7554/eLife.92078)
Supplement: Figure 1—source data 1. [file elife-92078-fig1-data1.xlsx]

## Sheet: Figure 1C
Toxin	Photo_ID	n_cav_surf
Tox+	B10_10	2.5591
Tox+	B10_11	2.05835
Tox+	B10_12	2.89996
Tox+	B10_13	1.39562
Tox+	B10_14	3.65888
Tox+	B10_15	6.15358
Tox+	B10_17	4.4234
Tox+	B10_17b	4.38323
Tox+	B10_19	2.37495
Tox+	B10_20	3.54776
Tox+	B10_21	3.31717
Tox+	B10_22	2.32837
Tox+	B10_23	9.95157
Tox+	B10_24	2.57756
Tox+	B10_25	1.99031
Tox+	B10_26	5.38564
Tox+	B10_7	2.00042
Tox+	B10_8	0.66008
Tox+	B10_9	2.48789
Tox-	B8_10	1.53586
Tox-	B8_11	3.79738
Tox-	B8_14	2.15616
Tox-	B8_15	4.30838
Tox-	B8_18	7.13872
Tox-	B8_19	9.68897
Tox-	B8_20	9.75904
Tox-	B8_21	9.61103
Tox-	B8_22	9.16275
Tox-	B8_3	1.26497
Tox-	B8_4	7.51144
Tox-	B8_5	5.20754
Tox-	B8_6	3.39089
Tox-	B8_7	2.34111
Tox-	B8_8	6.38559
Tox-	B8_9	3.39709

## Sheet: Figure 1C -raw data
Grille	Picture_name	Caveolae_Number	Area	Feret_diameter	Toxin	Membrane_Area	Photo_ID
B8	3	1	8480.4	104.9	Tox-	9.4864e+06	B8_3
B8	3	2	10338.9	139.9	Tox-	9.4864e+06	B8_3
B8	3	3	6254	98.4	Tox-	9.4864e+06	B8_3
B8	3	4	4295.1	83.1	Tox-	9.4864e+06	B8_3
B8	3	5	8908	111.5	Tox-	9.4864e+06	B8_3
B8	3	6	9731	119.1	Tox-	9.4864e+06	B8_3
B8	3	7	8480.4	104.9	Tox-	9.4864e+06	B8_3
B8	3	8	4056.3	87.4	Tox-	9.4864e+06	B8_3
B8	3	9	4600.9	76.5	Tox-	9.4864e+06	B8_3
B8	3	10	5217.2	83.1	Tox-	9.4864e+06	B8_3
B8	3	11	6611.1	95.1	Tox-	9.4864e+06	B8_3
B8	3	12	14715.3	1448.8	Tox-	9.4864e+06	B8_3
B8	4	1	6826.2	94.9	Tox-	1.19817e+07	B8_4
B8	4	2	10335.8	114.5	Tox-	1.19817e+07	B8_4
B8	4	3	6387.1	108	Tox-	1.19817e+07	B8_4
B8	4	4	5043.5	84	Tox-	1.19817e+07	B8_4
B8	4	5	5261.3	81.8	Tox-	1.19817e+07	B8_4
B8	4	6	5620.7	94.9	Tox-	1.19817e+07	B8_4
B8	4	7	6826.2	94.9	Tox-	1.19817e+07	B8_4
B8	4	8	9158.8	111.3	Tox-	1.19817e+07	B8_4
B8	4	9	8050.8	108	Tox-	1.19817e+07	B8_4
B8	4	10	5255.3	85.1	Tox-	1.19817e+07	B8_4
B8	4	11	7288	104.7	Tox-	1.19817e+07	B8_4
B8	4	12	5660	91.6	Tox-	1.19817e+07	B8_4
B8	4	13	4646	78.5	Tox-	1.19817e+07	B8_4
B8	4	14	5255.3	85.1	Tox-	1.19817e+07	B8_4
B8	4	15	10551.2	124.4	Tox-	1.19817e+07	B8_4
B8	4	16	6055.1	98.2	Tox-	1.19817e+07	B8_4
B8	4	17	8897	108	Tox-	1.19817e+07	B8_4
B8	4	18	9728.8	114.5	Tox-	1.19817e+07	B8_4
B8	4	19	5909.9	88.4	Tox-	1.19817e+07	B8_4
B8	4	20	6823.9	98.2	Tox-	1.19817e+07	B8_4
B8	4	21	4781.7	79.6	Tox-	1.19817e+07	B8_4
B8	4	22	5228	88.4	Tox-	1.19817e+07	B8_4
B8	4	23	5376.7	94.9	Tox-	1.19817e+07	B8_4
B8	4	24	4941.2	91.6	Tox-	1.19817e+07	B8_4
B8	4	25	8309.1	111.3	Tox-	1.19817e+07	B8_4
B8	4	26	8543.5	114.5	Tox-	1.19817e+07	B8_4
B8	4	27	5999.1	101.5	Tox-	1.19817e+07	B8_4
B8	4	28	5909.9	88.4	Tox-	1.19817e+07	B8_4
B8	4	29	9158.8	111.3	Tox-	1.19817e+07	B8_4
B8	4	30	9106.4	117.8	Tox-	1.19817e+07	B8_4
B8	4	31	4267.6	75.3	Tox-	1.19817e+07	B8_4
B8	4	32	7969.9	114.5	Tox-	1.19817e+07	B8_4
B8	4	33	6343.1	94.9	Tox-	1.19817e+07	B8_4
B8	4	34	9158.8	111.3	Tox-	1.19817e+07	B8_4
B8	4	35	4830.5	81.8	Tox-	1.19817e+07	B8_4
B8	4	36	8847	114.5	Tox-	1.19817e+07	B8_4
B8	4	37	8610.2	108	Tox-	1.19817e+07	B8_4
B8	4	38	4831.7	78.5	Tox-	1.19817e+07	B8_4
B8	4	39	7328.4	98.2	Tox-	1.19817e+07	B8_4
B8	4	40	3698.7	72	Tox-	1.19817e+07	B8_4
B8	4	41	6343.1	94.9	Tox-	1.19817e+07	B8_4
B8	4	42	7051.2	101.5	Tox-	1.19817e+07	B8_4
B8	4	43	5620.7	94.9	Tox-	1.19817e+07	B8_4
B8	4	44	5819.4	98.2	Tox-	1.19817e+07	B8_4
B8	4	45	3846.3	78.5	Tox-	1.19817e+07	B8_4
B8	4	46	6100.3	108	Tox-	1.19817e+07	B8_4
B8	4	47	5422	91.6	Tox-	1.19817e+07	B8_4
B8	4	48	8354.3	104.7	Tox-	1.19817e+07	B8_4
B8	4	49	6735.8	104.7	Tox-	1.19817e+07	B8_4
B8	4	50	6450.2	104.7	Tox-	1.19817e+07	B8_4
B8	4	51	8354.3	104.7	Tox-	1.19817e+07	B8_4
B8	4	52	6364.5	91.6	Tox-	1.19817e+07	B8_4
B8	4	53	9808.6	127.6	Tox-	1.19817e+07	B8_4
B8	4	54	8847	114.5	Tox-	1.19817e+07	B8_4
B8	4	55	8847	114.5	Tox-	1.19817e+07	B8_4
B8	4	56	9126.6	114.5	Tox-	1.19817e+07	B8_4
B8	4	57	8011.5	111.3	Tox-	1.19817e+07	B8_4
B8	4	58	8568.5	111.3	Tox-	1.19817e+07	B8_4
B8	4	59	6587	94.9	Tox-	1.19817e+07	B8_4
B8	4	60	7311.8	101.5	Tox-	1.19817e+07	B8_4
B8	4	61	7833	101.5	Tox-	1.19817e+07	B8_4
B8	4	62	7540.3	104.7	Tox-	1.19817e+07	B8_4
B8	4	63	8354.3	104.7	Tox-	1.19817e+07	B8_4
B8	4	64	9430.1	114.5	Tox-	1.19817e+07	B8_4
B8	4	65	4064.1	75.3	Tox-	1.19817e+07	B8_4
B8	4	66	6364.5	91.6	Tox-	1.19817e+07	B8_4
B8	4	67	10589.2	121.1	Tox-	1.19817e+07	B8_4
B8	4	68	4830.5	81.8	Tox-	1.19817e+07	B8_4
B8	4	69	4634.1	81.8	Tox-	1.19817e+07	B8_4
B8	4	70	4414	81.8	Tox-	1.19817e+07	B8_4
B8	4	71	5278	108	Tox-	1.19817e+07	B8_4
B8	4	72	12383.9	160.4	Tox-	1.19817e+07	B8_4
B8	4	73	19533.8	176.7	Tox-	1.19817e+07	B8_4
B8	4	74	11436.6	137.5	Tox-	1.19817e+07	B8_4
B8	4	75	7002.4	104.7	Tox-	1.19817e+07	B8_4
B8	4	76	6573.9	98.2	Tox-	1.19817e+07	B8_4
B8	4	77	5055.4	81.8	Tox-	1.19817e+07	B8_4
B8	4	78	7587.9	98.2	Tox-	1.19817e+07	B8_4
B8	4	79	7051.2	101.5	Tox-	1.19817e+07	B8_4
B8	4	80	6941.7	108	Tox-	1.19817e+07	B8_4
B8	4	81	6590.6	111.3	Tox-	1.19817e+07	B8_4
B8	4	82	11324.7	137.5	Tox-	1.19817e+07	B8_4
B8	4	83	6490.6	114.5	Tox-	1.19817e+07	B8_4
B8	4	84	5620.7	94.9	Tox-	1.19817e+07	B8_4
B8	4	85	12682.6	140.7	Tox-	1.19817e+07	B8_4
B8	4	86	7268.9	117.8	Tox-	1.19817e+07	B8_4
B8	4	87	8606.6	104.7	Tox-	1.19817e+07	B8_4
B8	4	88	9656.2	111.3	Tox-	1.19817e+07	B8_4
B8	4	89	9739.5	111.3	Tox-	1.19817e+07	B8_4
B8	4	90	9169.5	108	Tox-	1.19817e+07	B8_4
B8	5	1	11285.3	122.1	Tox-	1.13297e+07	B8_5
B8	5	2	7845	114.4	Tox-	1.13297e+07	B8_5
B8	5	3	6075	101.4	Tox-	1.13297e+07	B8_5
B8	5	4	8327.3	107.9	Tox-	1.13297e+07	B8_5
B8	5	5	7563.5	101.4	Tox-	1.13297e+07	B8_5
B8	5	6	9413.1	114.4	Tox-	1.13297e+07	B8_5
B8	5	7	8591.1	104.6	Tox-	1.13297e+07	B8_5
B8	5	8	7633.6	102.5	Tox-	1.13297e+07	B8_5
B8	5	9	5251.8	81.7	Tox-	1.13297e+07	B8_5
B8	5	10	8488.9	110.1	Tox-	1.13297e+07	B8_5
B8	5	11	9148.2	110.1	Tox-	1.13297e+07	B8_5
B8	5	12	4637.7	78.5	Tox-	1.13297e+07	B8_5
B8	5	13	5251.8	81.7	Tox-	1.13297e+07	B8_5
B8	5	14	8421.2	107.9	Tox-	1.13297e+07	B8_5
B8	5	15	6353	91.6	Tox-	1.13297e+07	B8_5
B8	5	16	6495.6	94.8	Tox-	1.13297e+07	B8_5
B8	5	17	5677.1	88.3	Tox-	1.13297e+07	B8_5
B8	5	18	6331.6	94.8	Tox-	1.13297e+07	B8_5
B8	5	19	8294.1	111.2	Tox-	1.13297e+07	B8_5
B8	5	20	7961.5	106.8	Tox-	1.13297e+07	B8_5
B8	5	21	8036.3	107.9	Tox-	1.13297e+07	B8_5
B8	5	22	5737.7	101.4	Tox-	1.13297e+07	B8_5
B8	5	23	9584.2	124.3	Tox-	1.13297e+07	B8_5
B8	5	24	7298.6	101.4	Tox-	1.13297e+07	B8_5
B8	5	25	7818.9	101.4	Tox-	1.13297e+07	B8_5
B8	5	26	6331.6	94.8	Tox-	1.13297e+07	B8_5
B8	5	27	9619.8	114.4	Tox-	1.13297e+07	B8_5
B8	5	28	5877.8	91.6	Tox-	1.13297e+07	B8_5
B8	5	29	6129.7	91.6	Tox-	1.13297e+07	B8_5
B8	5	30	7574.2	98.1	Tox-	1.13297e+07	B8_5
B8	5	31	7315.2	98.1	Tox-	1.13297e+07	B8_5
B8	5	32	8327.3	107.9	Tox-	1.13297e+07	B8_5
B8	5	33	7693	106.8	Tox-	1.13297e+07	B8_5
B8	5	34	6989.7	104.6	Tox-	1.13297e+07	B8_5
B8	5	35	7061	98.1	Tox-	1.13297e+07	B8_5
B8	5	36	5649.8	91.6	Tox-	1.13297e+07	B8_5
B8	5	37	7574.2	98.1	Tox-	1.13297e+07	B8_5
B8	5	38	12456.6	127.5	Tox-	1.13297e+07	B8_5
B8	5	39	9425	111.2	Tox-	1.13297e+07	B8_5
B8	5	40	5251.8	81.7	Tox-	1.13297e+07	B8_5
B8	5	41	5899.2	88.3	Tox-	1.13297e+07	B8_5
B8	5	42	8864.3	110.1	Tox-	1.13297e+07	B8_5
B8	5	43	7563.5	101.4	Tox-	1.13297e+07	B8_5
B8	5	44	6140.4	88.3	Tox-	1.13297e+07	B8_5
B8	5	45	6353	91.6	Tox-	1.13297e+07	B8_5
B8	5	46	7633.6	102.5	Tox-	1.13297e+07	B8_5
B8	5	47	7315.2	98.1	Tox-	1.13297e+07	B8_5
B8	5	48	9711.3	114.4	Tox-	1.13297e+07	B8_5
B8	5	49	6331.6	94.8	Tox-	1.13297e+07	B8_5
B8	5	50	11171.2	121	Tox-	1.13297e+07	B8_5
B8	5	51	16456.3	173.3	Tox-	1.13297e+07	B8_5
B8	5	52	9142.3	111.2	Tox-	1.13297e+07	B8_5
B8	5	53	8766.9	117.7	Tox-	1.13297e+07	B8_5
B8	5	54	9711.3	114.4	Tox-	1.13297e+07	B8_5
B8	5	55	6129.7	91.6	Tox-	1.13297e+07	B8_5
B8	5	56	3513.9	71.9	Tox-	1.13297e+07	B8_5
B8	5	57	4625.8	81.7	Tox-	1.13297e+07	B8_5
B8	5	58	7061	98.1	Tox-	1.13297e+07	B8_5
B8	5	59	13563.7	133	Tox-	1.13297e+07	B8_5
B8	6	1	12197.4	126.8	Tox-	1.09116e+07	B8_6
B8	6	2	9760.8	113.7	Tox-	1.09116e+07	B8_6
B8	6	3	5140.8	83.1	Tox-	1.09116e+07	B8_6
B8	6	4	14442.9	153	Tox-	1.09116e+07	B8_6
B8	6	5	6621.9	91.8	Tox-	1.09116e+07	B8_6
B8	6	6	9015.5	109.3	Tox-	1.09116e+07	B8_6
B8	6	7	6287.4	96.2	Tox-	1.09116e+07	B8_6
B8	6	8	3855.6	69.9	Tox-	1.09116e+07	B8_6
B8	6	9	6942	96.2	Tox-	1.09116e+07	B8_6
B8	6	10	8647.6	107.1	Tox-	1.09116e+07	B8_6
B8	6	11	7801.9	113.7	Tox-	1.09116e+07	B8_6
B8	6	12	8198.5	113.7	Tox-	1.09116e+07	B8_6
B8	6	13	10143	118	Tox-	1.09116e+07	B8_6
B8	6	14	9760.8	113.7	Tox-	1.09116e+07	B8_6
B8	6	15	13926.9	139.9	Tox-	1.09116e+07	B8_6
B8	6	16	7567.8	104.9	Tox-	1.09116e+07	B8_6
B8	6	17	7696.8	118	Tox-	1.09116e+07	B8_6
B8	6	18	9321.2	118	Tox-	1.09116e+07	B8_6
B8	6	19	9130.1	139.9	Tox-	1.09116e+07	B8_6
B8	6	20	6942	96.2	Tox-	1.09116e+07	B8_6
B8	6	21	8270.2	109.3	Tox-	1.09116e+07	B8_6
B8	6	22	5140.8	83.1	Tox-	1.09116e+07	B8_6
B8	6	23	5709.3	87.4	Tox-	1.09116e+07	B8_6
B8	6	24	6000.8	87.4	Tox-	1.09116e+07	B8_6
B8	6	25	8819.6	122.4	Tox-	1.09116e+07	B8_6
B8	6	26	11347	122.4	Tox-	1.09116e+07	B8_6
B8	6	27	7801.9	113.7	Tox-	1.09116e+07	B8_6
B8	6	28	4605.7	78.7	Tox-	1.09116e+07	B8_6
B8	6	29	7266.8	100.5	Tox-	1.09116e+07	B8_6
B8	6	30	10143	113.7	Tox-	1.09116e+07	B8_6
B8	6	31	6889.4	118	Tox-	1.09116e+07	B8_6
B8	6	32	8623.7	109.3	Tox-	1.09116e+07	B8_6
B8	6	33	7219.1	104.9	Tox-	1.09116e+07	B8_6
B8	6	34	11729.2	131.1	Tox-	1.09116e+07	B8_6
B8	6	35	8112.5	118	Tox-	1.09116e+07	B8_6
B8	6	36	5996	91.8	Tox-	1.09116e+07	B8_6
B8	6	37	10143	118	Tox-	1.09116e+07	B8_6
B8	7	1	7369.9	100.3	Tox-	1.19601e+07	B8_7
B8	7	2	13105.2	131.9	Tox-	1.19601e+07	B8_7
B8	7	3	9474.9	117.7	Tox-	1.19601e+07	B8_7
B8	7	4	9204	122.1	Tox-	1.19601e+07	B8_7
B8	7	5	11285.3	119.9	Tox-	1.19601e+07	B8_7
B8	7	6	8225.2	109	Tox-	1.19601e+07	B8_7
B8	7	7	11874.5	130.8	Tox-	1.19601e+07	B8_7
B8	7	8	11285.3	122.1	Tox-	1.19601e+07	B8_7
B8	7	9	12701.3	137.3	Tox-	1.19601e+07	B8_7
B8	7	10	13219.2	130.8	Tox-	1.19601e+07	B8_7
B8	7	11	8766.9	109	Tox-	1.19601e+07	B8_7
B8	7	12	11674.9	128.6	Tox-	1.19601e+07	B8_7
B8	7	13	11503.9	122.1	Tox-	1.19601e+07	B8_7
B8	7	14	15528.6	146.1	Tox-	1.19601e+07	B8_7
B8	7	15	8999.7	122.1	Tox-	1.19601e+07	B8_7
B8	7	16	7369.9	102.5	Tox-	1.19601e+07	B8_7
B8	7	17	10030.8	122.1	Tox-	1.19601e+07	B8_7
B8	7	18	9712.5	115.5	Tox-	1.19601e+07	B8_7
B8	7	19	6571.6	95.9	Tox-	1.19601e+07	B8_7
B8	7	20	8016.1	109	Tox-	1.19601e+07	B8_7
B8	7	21	9299.1	115.5	Tox-	1.19601e+07	B8_7
B8	7	22	6562.1	98.1	Tox-	1.19601e+07	B8_7
B8	7	23	7215.5	107.9	Tox-	1.19601e+07	B8_7
B8	7	24	9425	111.2	Tox-	1.19601e+07	B8_7
B8	7	25	5112.8	80.7	Tox-	1.19601e+07	B8_7
B8	7	26	6899.5	93.7	Tox-	1.19601e+07	B8_7
B8	7	27	12592	2813.6	Tox-	1.19601e+07	B8_7
B8	7	28	6899.5	93.7	Tox-	1.19601e+07	B8_7
B8	8	1	8225.7	118.2	Tox-	1.20584e+07	B8_8
B8	8	2	4341.6	88.7	Tox-	1.20584e+07	B8_8
B8	8	3	5490.2	88.7	Tox-	1.20584e+07	B8_8
B8	8	4	6699.8	98.5	Tox-	1.20584e+07	B8_8
B8	8	5	7096.3	101.8	Tox-	1.20584e+07	B8_8
B8	8	6	10304.9	124.8	Tox-	1.20584e+07	B8_8
B8	8	7	7588.5	105.1	Tox-	1.20584e+07	B8_8
B8	8	8	7861.6	105.1	Tox-	1.20584e+07	B8_8
B8	8	9	8661.7	105.1	Tox-	1.20584e+07	B8_8
B8	8	10	7861.6	105.1	Tox-	1.20584e+07	B8_8
B8	8	11	7047.2	105.1	Tox-	1.20584e+07	B8_8
B8	8	12	7832.9	108.3	Tox-	1.20584e+07	B8_8
B8	8	13	5289	85.4	Tox-	1.20584e+07	B8_8
B8	8	14	7096.3	101.8	Tox-	1.20584e+07	B8_8
B8	8	15	5490.2	88.7	Tox-	1.20584e+07	B8_8
B8	8	16	4972.8	91.9	Tox-	1.20584e+07	B8_8
B8	8	17	5887.8	95.2	Tox-	1.20584e+07	B8_8
B8	8	18	7358.6	101.8	Tox-	1.20584e+07	B8_8
B8	8	19	6632.8	111.6	Tox-	1.20584e+07	B8_8
B8	8	20	6383.7	95.2	Tox-	1.20584e+07	B8_8
B8	8	21	5590.8	98.5	Tox-	1.20584e+07	B8_8
B8	8	22	8407.7	105.1	Tox-	1.20584e+07	B8_8
B8	8	23	9724	121.5	Tox-	1.20584e+07	B8_8
B8	8	24	8553.9	111.6	Tox-	1.20584e+07	B8_8
B8	8	25	6147.7	95.2	Tox-	1.20584e+07	B8_8
B8	8	26	5656.7	95.2	Tox-	1.20584e+07	B8_8
B8	8	27	6180.1	91.9	Tox-	1.20584e+07	B8_8
B8	8	28	5221.9	91.9	Tox-	1.20584e+07	B8_8
B8	8	29	5507	85.4	Tox-	1.20584e+07	B8_8
B8	8	30	7375.3	98.5	Tox-	1.20584e+07	B8_8
B8	8	31	4752.4	91.9	Tox-	1.20584e+07	B8_8
B8	8	32	7096.3	101.8	Tox-	1.20584e+07	B8_8
B8	8	33	5969.3	105.1	Tox-	1.20584e+07	B8_8
B8	8	34	6037.5	101.8	Tox-	1.20584e+07	B8_8
B8	8	35	6632.8	111.6	Tox-	1.20584e+07	B8_8
B8	8	36	10417.5	134.6	Tox-	1.20584e+07	B8_8
B8	8	37	3046.9	78.8	Tox-	1.20584e+07	B8_8
B8	8	38	3217	88.7	Tox-	1.20584e+07	B8_8
B8	8	39	4742.8	87.6	Tox-	1.20584e+07	B8_8
B8	8	40	5295	82.1	Tox-	1.20584e+07	B8_8
B8	8	41	5739.3	85.4	Tox-	1.20584e+07	B8_8
B8	8	42	5507	85.4	Tox-	1.20584e+07	B8_8
B8	8	43	7119	98.5	Tox-	1.20584e+07	B8_8
B8	8	44	8407.7	105.1	Tox-	1.20584e+07	B8_8
B8	8	45	7096.3	101.8	Tox-	1.20584e+07	B8_8
B8	8	46	5221.9	91.9	Tox-	1.20584e+07	B8_8
B8	8	47	4090.1	75.5	Tox-	1.20584e+07	B8_8
B8	8	48	6012.4	91.9	Tox-	1.20584e+07	B8_8
B8	8	49	8020.9	114.9	Tox-	1.20584e+07	B8_8
B8	8	50	6309.4	101.8	Tox-	1.20584e+07	B8_8
B8	8	51	6867.5	98.5	Tox-	1.20584e+07	B8_8
B8	8	52	8838.9	118.2	Tox-	1.20584e+07	B8_8
B8	8	53	7861.6	105.1	Tox-	1.20584e+07	B8_8
B8	8	54	9791.1	114.9	Tox-	1.20584e+07	B8_8
B8	8	55	8838.9	118.2	Tox-	1.20584e+07	B8_8
B8	8	56	7938.2	118.2	Tox-	1.20584e+07	B8_8
B8	8	57	8953.9	108.3	Tox-	1.20584e+07	B8_8
B8	8	58	6383.7	95.2	Tox-	1.20584e+07	B8_8
B8	8	59	6829.2	101.8	Tox-	1.20584e+07	B8_8
B8	8	60	7636.4	98.5	Tox-	1.20584e+07	B8_8
B8	8	61	5869.9	108.3	Tox-	1.20584e+07	B8_8
B8	8	62	5221.9	91.9	Tox-	1.20584e+07	B8_8
B8	8	63	8102.3	108.3	Tox-	1.20584e+07	B8_8
B8	8	64	10362.4	118.2	Tox-	1.20584e+07	B8_8
B8	8	65	5947.7	88.7	Tox-	1.20584e+07	B8_8
B8	8	66	7119	98.5	Tox-	1.20584e+07	B8_8
B8	8	67	4032.6	82.1	Tox-	1.20584e+07	B8_8
B8	8	68	5590.8	98.5	Tox-	1.20584e+07	B8_8
B8	8	69	6383.7	95.2	Tox-	1.20584e+07	B8_8
B8	8	70	5087.8	82.1	Tox-	1.20584e+07	B8_8
B8	8	71	5261.4	88.7	Tox-	1.20584e+07	B8_8
B8	8	72	8953.9	108.3	Tox-	1.20584e+07	B8_8
B8	8	73	6632.8	111.6	Tox-	1.20584e+07	B8_8
B8	8	74	7883.2	101.8	Tox-	1.20584e+07	B8_8
B8	8	75	7625.7	101.8	Tox-	1.20584e+07	B8_8
B8	8	76	7861.6	105.1	Tox-	1.20584e+07	B8_8
B8	8	77	7119	98.5	Tox-	1.20584e+07	B8_8
B8	9	1	7614.5	102.9	Tox-	1.20692e+07	B8_9
B8	9	2	8669.4	105.1	Tox-	1.20692e+07	B8_9
B8	9	3	12889	129.2	Tox-	1.20692e+07	B8_9
B8	9	4	8463.2	111.7	Tox-	1.20692e+07	B8_9
B8	9	5	9796.2	129.2	Tox-	1.20692e+07	B8_9
B8	9	6	5830.7	94.2	Tox-	1.20692e+07	B8_9
B8	9	7	7163.7	109.5	Tox-	1.20692e+07	B8_9
B8	9	8	5744.4	85.4	Tox-	1.20692e+07	B8_9
B8	9	9	9767.4	118.3	Tox-	1.20692e+07	B8_9
B8	9	10	8911.5	115	Tox-	1.20692e+07	B8_9
B8	9	11	6635.1	95.3	Tox-	1.20692e+07	B8_9
B8	9	12	8403.2	108.4	Tox-	1.20692e+07	B8_9
B8	9	13	7281.2	108.4	Tox-	1.20692e+07	B8_9
B8	9	14	10486.7	118.3	Tox-	1.20692e+07	B8_9
B8	9	15	7341.1	105.1	Tox-	1.20692e+07	B8_9
B8	9	16	9410.2	121.5	Tox-	1.20692e+07	B8_9
B8	9	17	5511.9	85.4	Tox-	1.20692e+07	B8_9
B8	9	18	6835.3	101.8	Tox-	1.20692e+07	B8_9
B8	9	19	9810.6	111.7	Tox-	1.20692e+07	B8_9
B8	9	20	8755.7	141.2	Tox-	1.20692e+07	B8_9
B8	9	21	10359.6	154.4	Tox-	1.20692e+07	B8_9
B8	9	22	7890.2	101.8	Tox-	1.20692e+07	B8_9
B8	9	23	6819.7	115	Tox-	1.20692e+07	B8_9
B8	9	24	6355.8	98.5	Tox-	1.20692e+07	B8_9
B8	9	25	7365.1	101.8	Tox-	1.20692e+07	B8_9
B8	9	26	5728.8	88.7	Tox-	1.20692e+07	B8_9
B8	9	27	9498.9	131.4	Tox-	1.20692e+07	B8_9
B8	9	28	11581.1	128.1	Tox-	1.20692e+07	B8_9
B8	9	29	9569.6	128.1	Tox-	1.20692e+07	B8_9
B8	9	30	8940.3	111.7	Tox-	1.20692e+07	B8_9
B8	9	31	10974.6	121.5	Tox-	1.20692e+07	B8_9
B8	9	32	14608	138	Tox-	1.20692e+07	B8_9
B8	9	33	9498.9	115	Tox-	1.20692e+07	B8_9
B8	9	34	9041	134.7	Tox-	1.20692e+07	B8_9
B8	9	35	12246.4	124.8	Tox-	1.20692e+07	B8_9
B8	9	36	9732.7	121.5	Tox-	1.20692e+07	B8_9
B8	9	37	7739.1	124.8	Tox-	1.20692e+07	B8_9
B8	9	38	21084.8	3113.9	Tox-	1.20692e+07	B8_9
B8	9	39	10573	116.1	Tox-	1.20692e+07	B8_9
B8	9	40	20216.9	212.7	Tox-	1.20692e+07	B8_9
B8	9	41	7141	95.3	Tox-	1.20692e+07	B8_9
B8	10	1	4090.2	74.5	Tox-	9.11543e+06	B8_10
B8	10	2	7691.4	111.7	Tox-	9.11543e+06	B8_10
B8	10	3	5854.9	92	Tox-	9.11543e+06	B8_10
B8	10	4	5226.7	92	Tox-	9.11543e+06	B8_10
B8	10	5	6765.9	100.7	Tox-	9.11543e+06	B8_10
B8	10	6	6099.4	98.5	Tox-	9.11543e+06	B8_10
B8	10	7	4963	87.6	Tox-	9.11543e+06	B8_10
B8	10	8	5507.2	86.5	Tox-	9.11543e+06	B8_10
B8	10	9	5197.9	94.2	Tox-	9.11543e+06	B8_10
B8	10	10	5298.6	113.9	Tox-	9.11543e+06	B8_10
B8	10	11	4756.8	78.8	Tox-	9.11543e+06	B8_10
B8	10	12	5735	89.8	Tox-	9.11543e+06	B8_10
B8	10	13	6161.7	94.2	Tox-	9.11543e+06	B8_10
B8	10	14	5878.8	87.6	Tox-	9.11543e+06	B8_10
B8	11	1	8637.6	115.2	Tox-	1.21136e+07	B8_11
B8	11	2	6659.5	95.4	Tox-	1.21136e+07	B8_11
B8	11	3	7623.3	105.3	Tox-	1.21136e+07	B8_11
B8	11	4	9533.9	115.2	Tox-	1.21136e+07	B8_11
B8	11	5	6659.5	95.4	Tox-	1.21136e+07	B8_11
B8	11	6	7308.1	108.6	Tox-	1.21136e+07	B8_11
B8	11	7	6175.9	95.4	Tox-	1.21136e+07	B8_11
B8	11	8	7308.1	108.6	Tox-	1.21136e+07	B8_11
B8	11	9	9135.7	121.8	Tox-	1.21136e+07	B8_11
B8	11	10	8507.6	121.8	Tox-	1.21136e+07	B8_11
B8	11	11	5974.9	88.9	Tox-	1.21136e+07	B8_11
B8	11	12	6954.3	111.9	Tox-	1.21136e+07	B8_11
B8	11	13	7818.2	111.9	Tox-	1.21136e+07	B8_11
B8	11	14	6601.8	102	Tox-	1.21136e+07	B8_11
B8	11	15	8973.2	111.9	Tox-	1.21136e+07	B8_11
B8	11	16	13480.3	144.8	Tox-	1.21136e+07	B8_11
B8	11	17	6899	98.7	Tox-	1.21136e+07	B8_11
B8	11	18	7919.3	102	Tox-	1.21136e+07	B8_11
B8	11	19	5974.9	88.9	Tox-	1.21136e+07	B8_11
B8	11	20	5111.1	82.3	Tox-	1.21136e+07	B8_11
B8	11	21	7156.5	115.2	Tox-	1.21136e+07	B8_11
B8	11	22	6659.5	95.4	Tox-	1.21136e+07	B8_11
B8	11	23	4656.3	85.6	Tox-	1.21136e+07	B8_11
B8	11	24	5974.9	88.9	Tox-	1.21136e+07	B8_11
B8	11	25	9533.9	115.2	Tox-	1.21136e+07	B8_11
B8	11	26	6379.2	98.7	Tox-	1.21136e+07	B8_11
B8	11	27	6412.9	95.4	Tox-	1.21136e+07	B8_11
B8	11	28	7251.5	121.8	Tox-	1.21136e+07	B8_11
B8	11	29	8057.6	115.2	Tox-	1.21136e+07	B8_11
B8	11	30	8400.5	111.9	Tox-	1.21136e+07	B8_11
B8	11	31	7623.3	105.3	Tox-	1.21136e+07	B8_11
B8	11	32	8167.1	105.3	Tox-	1.21136e+07	B8_11
B8	11	33	7368.2	105.3	Tox-	1.21136e+07	B8_11
B8	11	34	8585.8	118.5	Tox-	1.21136e+07	B8_11
B8	11	35	5099	85.6	Tox-	1.21136e+07	B8_11
B8	11	36	6208.4	92.1	Tox-	1.21136e+07	B8_11
B8	11	37	7392.3	102	Tox-	1.21136e+07	B8_11
B8	11	38	5953.3	92.1	Tox-	1.21136e+07	B8_11
B8	11	39	10131.9	134.9	Tox-	1.21136e+07	B8_11
B8	11	40	8585.8	118.5	Tox-	1.21136e+07	B8_11
B8	11	41	9074.3	134.9	Tox-	1.21136e+07	B8_11
B8	11	42	8994.9	108.6	Tox-	1.21136e+07	B8_11
B8	11	43	8507.6	121.8	Tox-	1.21136e+07	B8_11
B8	11	44	5883.5	98.7	Tox-	1.21136e+07	B8_11
B8	11	45	13600.6	131.6	Tox-	1.21136e+07	B8_11
B8	11	46	10612	116.3	Tox-	1.21136e+07	B8_11
B8	14	1	9787.5	113.8	Tox-	1.20585e+07	B8_14
B8	14	2	9404.3	111.6	Tox-	1.20585e+07	B8_14
B8	14	3	8503.6	120.4	Tox-	1.20585e+07	B8_14
B8	14	4	8129.9	105.1	Tox-	1.20585e+07	B8_14
B8	14	5	7286.8	100.7	Tox-	1.20585e+07	B8_14
B8	14	6	6908.3	100.7	Tox-	1.20585e+07	B8_14
B8	14	7	7756.3	107.3	Tox-	1.20585e+07	B8_14
B8	14	8	5154.9	81	Tox-	1.20585e+07	B8_14
B8	14	9	4848.3	83.2	Tox-	1.20585e+07	B8_14
B8	14	10	4115.3	72.2	Tox-	1.20585e+07	B8_14
B8	14	11	4465	78.8	Tox-	1.20585e+07	B8_14
B8	14	12	5581.3	87.6	Tox-	1.20585e+07	B8_14
B8	14	13	5806.4	96.3	Tox-	1.20585e+07	B8_14
B8	14	14	7938.3	107.3	Tox-	1.20585e+07	B8_14
B8	14	15	5993.3	94.1	Tox-	1.20585e+07	B8_14
B8	14	16	4853.1	85.4	Tox-	1.20585e+07	B8_14
B8	14	17	4230.3	76.6	Tox-	1.20585e+07	B8_14
B8	14	18	6649.6	94.1	Tox-	1.20585e+07	B8_14
B8	14	19	5950.1	96.3	Tox-	1.20585e+07	B8_14
B8	14	20	5423.2	87.6	Tox-	1.20585e+07	B8_14
B8	14	21	6237.6	100.7	Tox-	1.20585e+07	B8_14
B8	14	22	6616.1	98.5	Tox-	1.20585e+07	B8_14
B8	14	23	6383.7	95.2	Tox-	1.20585e+07	B8_14
B8	14	24	4728.5	83.2	Tox-	1.20585e+07	B8_14
B8	14	25	11804.5	122.6	Tox-	1.20585e+07	B8_14
B8	14	26	11804.5	122.6	Tox-	1.20585e+07	B8_14
B8	15	1	11461.6	134.7	Tox-	1.20695e+07	B8_15
B8	15	2	11901.5	128.1	Tox-	1.20695e+07	B8_15
B8	15	3	10160.9	131.4	Tox-	1.20695e+07	B8_15
B8	15	4	10358.7	121.5	Tox-	1.20695e+07	B8_15
B8	15	5	11205	161	Tox-	1.20695e+07	B8_15
B8	15	6	12240.8	128.1	Tox-	1.20695e+07	B8_15
B8	15	7	7053.6	105.1	Tox-	1.20695e+07	B8_15
B8	15	8	9511.2	111.7	Tox-	1.20695e+07	B8_15
B8	15	9	10411.4	115	Tox-	1.20695e+07	B8_15
B8	15	10	6622.1	98.5	Tox-	1.20695e+07	B8_15
B8	15	11	8631.2	111.7	Tox-	1.20695e+07	B8_15
B8	15	12	7629.1	118.3	Tox-	1.20695e+07	B8_15
B8	15	13	9928.3	128.1	Tox-	1.20695e+07	B8_15
B8	15	14	8962.1	108.4	Tox-	1.20695e+07	B8_15
B8	15	15	10358.7	121.5	Tox-	1.20695e+07	B8_15
B8	15	16	9225.8	111.7	Tox-	1.20695e+07	B8_15
B8	15	17	8270.4	110.6	Tox-	1.20695e+07	B8_15
B8	15	18	7890.4	101.8	Tox-	1.20695e+07	B8_15
B8	15	19	7125.6	131.4	Tox-	1.20695e+07	B8_15
B8	15	20	8154.1	121.5	Tox-	1.20695e+07	B8_15
B8	15	21	6356	98.5	Tox-	1.20695e+07	B8_15
B8	15	22	8911.8	115	Tox-	1.20695e+07	B8_15
B8	15	23	6622.1	98.5	Tox-	1.20695e+07	B8_15
B8	15	24	5423.3	105.1	Tox-	1.20695e+07	B8_15
B8	15	25	7141.2	95.3	Tox-	1.20695e+07	B8_15
B8	15	26	10666.8	121.5	Tox-	1.20695e+07	B8_15
B8	15	27	13220.2	131.4	Tox-	1.20695e+07	B8_15
B8	15	28	13362.8	147.8	Tox-	1.20695e+07	B8_15
B8	15	29	9800.1	115	Tox-	1.20695e+07	B8_15
B8	15	30	8403.5	108.4	Tox-	1.20695e+07	B8_15
B8	15	31	8962.1	108.4	Tox-	1.20695e+07	B8_15
B8	15	32	8940.5	111.7	Tox-	1.20695e+07	B8_15
B8	15	33	9014.9	124.8	Tox-	1.20695e+07	B8_15
B8	15	34	10666.8	121.5	Tox-	1.20695e+07	B8_15
B8	15	35	5862.1	98.5	Tox-	1.20695e+07	B8_15
B8	15	36	7868.8	105.1	Tox-	1.20695e+07	B8_15
B8	15	37	6519	98.5	Tox-	1.20695e+07	B8_15
B8	15	38	7204.7	111.7	Tox-	1.20695e+07	B8_15
B8	15	39	10971.3	124.8	Tox-	1.20695e+07	B8_15
B8	15	40	4446.3	82.1	Tox-	1.20695e+07	B8_15
B8	15	41	4517	92	Tox-	1.20695e+07	B8_15
B8	15	42	6185.7	92	Tox-	1.20695e+07	B8_15
B8	15	43	10912.5	128.1	Tox-	1.20695e+07	B8_15
B8	15	44	8270.4	110.6	Tox-	1.20695e+07	B8_15
B8	15	45	8369.9	111.7	Tox-	1.20695e+07	B8_15
B8	15	46	8415.5	105.1	Tox-	1.20695e+07	B8_15
B8	15	47	9928.3	128.1	Tox-	1.20695e+07	B8_15
B8	15	48	7595.5	105.1	Tox-	1.20695e+07	B8_15
B8	15	49	7421.7	115	Tox-	1.20695e+07	B8_15
B8	15	50	10669.2	118.3	Tox-	1.20695e+07	B8_15
B8	15	51	6835.5	101.8	Tox-	1.20695e+07	B8_15
B8	15	52	18028.5	1101.3	Tox-	1.20695e+07	B8_15
B8	18	1	5178.4	81.2	Tox-	7.00405e+06	B8_18
B8	18	2	3864.6	74.6	Tox-	7.00405e+06	B8_18
B8	18	3	5313.2	85.6	Tox-	7.00405e+06	B8_18
B8	18	4	7329.7	111.9	Tox-	7.00405e+06	B8_18
B8	18	5	7464.5	100.9	Tox-	7.00405e+06	B8_18
B8	18	6	4499.9	76.8	Tox-	7.00405e+06	B8_18
B8	18	7	4134.1	72.4	Tox-	7.00405e+06	B8_18
B8	18	8	5756	90	Tox-	7.00405e+06	B8_18
B8	18	9	6266.1	100.9	Tox-	7.00405e+06	B8_18
B8	18	10	4389.2	87.8	Tox-	7.00405e+06	B8_18
B8	18	11	4355.5	79	Tox-	7.00405e+06	B8_18
B8	18	12	3729.8	74.6	Tox-	7.00405e+06	B8_18
B8	18	13	5452.8	85.6	Tox-	7.00405e+06	B8_18
B8	18	14	5876.3	92.1	Tox-	7.00405e+06	B8_18
B8	18	15	5371	94.3	Tox-	7.00405e+06	B8_18
B8	18	16	5890.7	114.1	Tox-	7.00405e+06	B8_18
B8	18	17	5977.3	96.5	Tox-	7.00405e+06	B8_18
B8	18	18	6838.8	94.3	Tox-	7.00405e+06	B8_18
B8	18	19	4475.8	81.2	Tox-	7.00405e+06	B8_18
B8	18	20	4639.4	79	Tox-	7.00405e+06	B8_18
B8	18	21	4432.5	85.6	Tox-	7.00405e+06	B8_18
B8	18	22	3383.3	70.2	Tox-	7.00405e+06	B8_18
B8	18	23	2160.9	57	Tox-	7.00405e+06	B8_18
B8	18	24	2127.2	61.4	Tox-	7.00405e+06	B8_18
B8	18	25	2815.4	68	Tox-	7.00405e+06	B8_18
B8	18	26	3287.1	68	Tox-	7.00405e+06	B8_18
B8	18	27	3070.5	63.6	Tox-	7.00405e+06	B8_18
B8	18	28	5419.1	90	Tox-	7.00405e+06	B8_18
B8	18	29	7623.3	105.3	Tox-	7.00405e+06	B8_18
B8	18	30	6511.6	94.3	Tox-	7.00405e+06	B8_18
B8	18	31	3874.2	72.4	Tox-	7.00405e+06	B8_18
B8	18	32	3585.4	76.8	Tox-	7.00405e+06	B8_18
B8	18	33	4875.2	85.6	Tox-	7.00405e+06	B8_18
B8	18	34	7219	116.3	Tox-	7.00405e+06	B8_18
B8	18	35	7151.6	98.7	Tox-	7.00405e+06	B8_18
B8	18	36	7830.2	103.1	Tox-	7.00405e+06	B8_18
B8	18	37	9673.5	140.4	Tox-	7.00405e+06	B8_18
B8	18	38	6838.8	94.3	Tox-	7.00405e+06	B8_18
B8	18	39	7806.2	105.3	Tox-	7.00405e+06	B8_18
B8	18	40	7984.2	105.3	Tox-	7.00405e+06	B8_18
B8	18	41	4475.8	81.2	Tox-	7.00405e+06	B8_18
B8	18	42	5164	85.6	Tox-	7.00405e+06	B8_18
B8	18	43	4249.6	76.8	Tox-	7.00405e+06	B8_18
B8	18	44	5038.9	83.4	Tox-	7.00405e+06	B8_18
B8	18	45	5852.2	94.3	Tox-	7.00405e+06	B8_18
B8	18	46	6338.3	94.3	Tox-	7.00405e+06	B8_18
B8	18	47	5216.9	94.3	Tox-	7.00405e+06	B8_18
B8	18	48	5178.4	83.4	Tox-	7.00405e+06	B8_18
B8	18	49	3368.9	72.4	Tox-	7.00405e+06	B8_18
B8	18	50	4355.5	79	Tox-	7.00405e+06	B8_18
B8	19	1	3562	71.9	Tox-	9.39213e+06	B8_19
B8	19	2	4804.7	84.9	Tox-	9.39213e+06	B8_19
B8	19	3	5089.3	84.9	Tox-	9.39213e+06	B8_19
B8	19	4	4434.8	76.2	Tox-	9.39213e+06	B8_19
B8	19	5	6739.9	93.7	Tox-	9.39213e+06	B8_19
B8	19	6	8233.9	104.5	Tox-	9.39213e+06	B8_19
B8	19	7	11241	126.3	Tox-	9.39213e+06	B8_19
B8	19	8	8803.1	119.8	Tox-	9.39213e+06	B8_19
B8	19	9	9505.1	111.1	Tox-	9.39213e+06	B8_19
B8	19	10	7693.2	104.5	Tox-	9.39213e+06	B8_19
B8	19	11	7275.8	108.9	Tox-	9.39213e+06	B8_19
B8	19	12	9609.4	122	Tox-	9.39213e+06	B8_19
B8	19	13	5079.8	87.1	Tox-	9.39213e+06	B8_19
B8	19	14	6573.9	91.5	Tox-	9.39213e+06	B8_19
B8	19	15	6094.8	93.7	Tox-	9.39213e+06	B8_19
B8	19	16	5682.2	84.9	Tox-	9.39213e+06	B8_19
B8	19	17	10235.5	122	Tox-	9.39213e+06	B8_19
B8	19	18	9144.6	124.1	Tox-	9.39213e+06	B8_19
B8	19	19	5815	87.1	Tox-	9.39213e+06	B8_19
B8	19	20	6924.9	106.7	Tox-	9.39213e+06	B8_19
B8	19	21	6094.8	93.7	Tox-	9.39213e+06	B8_19
B8	19	22	7859.2	106.7	Tox-	9.39213e+06	B8_19
B8	19	23	8371.5	111.1	Tox-	9.39213e+06	B8_19
B8	19	24	5962	89.3	Tox-	9.39213e+06	B8_19
B8	19	25	4814.2	78.4	Tox-	9.39213e+06	B8_19
B8	19	26	7958.8	113.3	Tox-	9.39213e+06	B8_19
B8	19	27	4823.7	80.6	Tox-	9.39213e+06	B8_19
B8	19	28	5796	89.3	Tox-	9.39213e+06	B8_19
B8	19	29	5226.8	87.1	Tox-	9.39213e+06	B8_19
B8	19	30	5506.7	89.3	Tox-	9.39213e+06	B8_19
B8	19	31	6839.5	100.2	Tox-	9.39213e+06	B8_19
B8	19	32	5193.6	89.3	Tox-	9.39213e+06	B8_19
B8	19	33	6412.6	91.5	Tox-	9.39213e+06	B8_19
B8	19	34	5816.2	86	Tox-	9.39213e+06	B8_19
B8	19	35	6711.4	98	Tox-	9.39213e+06	B8_19
B8	19	36	5767.6	93.7	Tox-	9.39213e+06	B8_19
B8	19	37	4966	82.8	Tox-	9.39213e+06	B8_19
B8	19	38	5525.7	87.1	Tox-	9.39213e+06	B8_19
B8	19	39	9642.6	119.8	Tox-	9.39213e+06	B8_19
B8	19	40	6246.6	93.7	Tox-	9.39213e+06	B8_19
B8	19	41	7717	102.4	Tox-	9.39213e+06	B8_19
B8	19	42	4970.7	80.6	Tox-	9.39213e+06	B8_19
B8	19	43	7214.2	100.2	Tox-	9.39213e+06	B8_19
B8	19	44	6621.3	104.5	Tox-	9.39213e+06	B8_19
B8	19	45	6000	100.2	Tox-	9.39213e+06	B8_19
B8	19	46	5871.9	98	Tox-	9.39213e+06	B8_19
B8	19	47	5668	87.1	Tox-	9.39213e+06	B8_19
B8	19	48	5089.3	84.9	Tox-	9.39213e+06	B8_19
B8	19	49	5241.1	82.8	Tox-	9.39213e+06	B8_19
B8	19	50	6512.2	100.2	Tox-	9.39213e+06	B8_19
B8	19	51	6118.5	89.3	Tox-	9.39213e+06	B8_19
B8	19	52	9690.1	128.5	Tox-	9.39213e+06	B8_19
B8	19	53	4629.2	87.1	Tox-	9.39213e+06	B8_19
B8	19	54	6664	102.4	Tox-	9.39213e+06	B8_19
B8	19	55	7323.3	106.7	Tox-	9.39213e+06	B8_19
B8	19	56	6313	102.4	Tox-	9.39213e+06	B8_19
B8	19	57	6583.4	93.7	Tox-	9.39213e+06	B8_19
B8	19	58	9429.2	119.8	Tox-	9.39213e+06	B8_19
B8	19	59	8001.5	108.9	Tox-	9.39213e+06	B8_19
B8	19	60	7223.7	111.1	Tox-	9.39213e+06	B8_19
B8	19	61	8257.7	117.6	Tox-	9.39213e+06	B8_19
B8	19	62	6891.7	95.8	Tox-	9.39213e+06	B8_19
B8	19	63	6118.5	89.3	Tox-	9.39213e+06	B8_19
B8	19	64	6118.5	91.5	Tox-	9.39213e+06	B8_19
B8	19	65	6839.5	100.2	Tox-	9.39213e+06	B8_19
B8	19	66	7323.3	106.7	Tox-	9.39213e+06	B8_19
B8	19	67	7641.1	108.9	Tox-	9.39213e+06	B8_19
B8	19	68	8049	104.5	Tox-	9.39213e+06	B8_19
B8	19	69	8850.5	108.9	Tox-	9.39213e+06	B8_19
B8	19	70	5952.5	91.5	Tox-	9.39213e+06	B8_19
B8	19	71	5525.7	87.1	Tox-	9.39213e+06	B8_19
B8	19	72	5326.5	91.5	Tox-	9.39213e+06	B8_19
B8	19	73	4501.2	84.9	Tox-	9.39213e+06	B8_19
B8	19	74	5796	89.3	Tox-	9.39213e+06	B8_19
B8	19	75	6071.1	95.8	Tox-	9.39213e+06	B8_19
B8	19	76	4966	82.8	Tox-	9.39213e+06	B8_19
B8	19	77	6313	102.4	Tox-	9.39213e+06	B8_19
B8	19	78	6512.2	100.2	Tox-	9.39213e+06	B8_19
B8	19	79	9125.6	108.9	Tox-	9.39213e+06	B8_19
B8	19	80	7048.2	98	Tox-	9.39213e+06	B8_19
B8	19	81	6711.4	98	Tox-	9.39213e+06	B8_19
B8	19	82	5890.9	95.8	Tox-	9.39213e+06	B8_19
B8	19	83	5748.6	95.8	Tox-	9.39213e+06	B8_19
B8	19	84	5373.9	84.9	Tox-	9.39213e+06	B8_19
B8	19	85	5952.5	91.5	Tox-	9.39213e+06	B8_19
B8	19	86	5103.5	82.8	Tox-	9.39213e+06	B8_19
B8	19	87	6692.5	100.2	Tox-	9.39213e+06	B8_19
B8	19	88	6730.4	95.8	Tox-	9.39213e+06	B8_19
B8	19	89	5962	89.3	Tox-	9.39213e+06	B8_19
B8	19	90	5668	87.1	Tox-	9.39213e+06	B8_19
B8	19	91	4074.3	71.9	Tox-	9.39213e+06	B8_19
B8	20	1	11602.5	128.2	Tox-	1.20914e+07	B8_20
B8	20	2	8978.4	108.5	Tox-	1.20914e+07	B8_20
B8	20	3	9750.6	121.6	Tox-	1.20914e+07	B8_20
B8	20	4	6888.7	95.3	Tox-	1.20914e+07	B8_20
B8	20	5	10262.2	128.2	Tox-	1.20914e+07	B8_20
B8	20	6	8152.1	105.2	Tox-	1.20914e+07	B8_20
B8	20	7	6422.7	92.1	Tox-	1.20914e+07	B8_20
B8	20	8	8740.6	111.8	Tox-	1.20914e+07	B8_20
B8	20	9	10994.8	121.6	Tox-	1.20914e+07	B8_20
B8	20	10	5522	85.5	Tox-	1.20914e+07	B8_20
B8	20	11	7005.2	108.5	Tox-	1.20914e+07	B8_20
B8	20	12	10088	118.4	Tox-	1.20914e+07	B8_20
B8	20	13	8688.9	108.5	Tox-	1.20914e+07	B8_20
B8	20	14	10390.7	118.4	Tox-	1.20914e+07	B8_20
B8	20	15	6886.3	98.6	Tox-	1.20914e+07	B8_20
B8	20	16	5471.6	92.1	Tox-	1.20914e+07	B8_20
B8	20	17	7609.3	105.2	Tox-	1.20914e+07	B8_20
B8	20	18	7066.4	105.2	Tox-	1.20914e+07	B8_20
B8	20	19	8124.5	108.5	Tox-	1.20914e+07	B8_20
B8	20	20	8084.8	111.8	Tox-	1.20914e+07	B8_20
B8	20	21	10008.8	124.9	Tox-	1.20914e+07	B8_20
B8	20	22	15281	147.9	Tox-	1.20914e+07	B8_20
B8	20	23	7378.7	101.9	Tox-	1.20914e+07	B8_20
B8	20	24	9516.4	115.1	Tox-	1.20914e+07	B8_20
B8	20	25	9516.4	115.1	Tox-	1.20914e+07	B8_20
B8	20	26	7115.7	101.9	Tox-	1.20914e+07	B8_20
B8	20	27	9242.6	111.8	Tox-	1.20914e+07	B8_20
B8	20	28	8927.9	115.1	Tox-	1.20914e+07	B8_20
B8	20	29	7717.4	115.1	Tox-	1.20914e+07	B8_20
B8	20	30	8927.9	115.1	Tox-	1.20914e+07	B8_20
B8	20	31	7378.7	101.9	Tox-	1.20914e+07	B8_20
B8	20	32	7138.5	98.6	Tox-	1.20914e+07	B8_20
B8	20	33	9587.2	128.2	Tox-	1.20914e+07	B8_20
B8	20	34	11293.8	121.6	Tox-	1.20914e+07	B8_20
B8	20	35	7854.3	108.5	Tox-	1.20914e+07	B8_20
B8	20	36	8152.1	105.2	Tox-	1.20914e+07	B8_20
B8	20	37	10349.9	138.1	Tox-	1.20914e+07	B8_20
B8	20	38	6647.3	95.3	Tox-	1.20914e+07	B8_20
B8	20	39	9516.4	115.1	Tox-	1.20914e+07	B8_20
B8	20	40	8042.8	115.1	Tox-	1.20914e+07	B8_20
B8	20	41	8978.4	108.5	Tox-	1.20914e+07	B8_20
B8	20	42	7609.3	105.2	Tox-	1.20914e+07	B8_20
B8	20	43	10793	134.8	Tox-	1.20914e+07	B8_20
B8	20	44	7646.5	101.9	Tox-	1.20914e+07	B8_20
B8	20	45	8978.4	108.5	Tox-	1.20914e+07	B8_20
B8	20	46	10262.2	128.2	Tox-	1.20914e+07	B8_20
B8	20	47	9365.1	124.9	Tox-	1.20914e+07	B8_20
B8	20	48	7354.7	105.2	Tox-	1.20914e+07	B8_20
B8	20	49	7294.6	108.5	Tox-	1.20914e+07	B8_20
B8	20	50	7508.4	111.8	Tox-	1.20914e+07	B8_20
B8	20	51	11281.8	124.9	Tox-	1.20914e+07	B8_20
B8	20	52	10044.8	121.6	Tox-	1.20914e+07	B8_20
B8	20	53	9478	118.4	Tox-	1.20914e+07	B8_20
B8	20	54	8385.1	111.8	Tox-	1.20914e+07	B8_20
B8	20	55	7657.3	98.6	Tox-	1.20914e+07	B8_20
B8	20	56	7378.7	101.9	Tox-	1.20914e+07	B8_20
B8	20	57	7395.5	98.6	Tox-	1.20914e+07	B8_20
B8	20	58	9946.3	128.2	Tox-	1.20914e+07	B8_20
B8	20	59	7154.1	95.3	Tox-	1.20914e+07	B8_20
B8	20	60	6401.1	95.3	Tox-	1.20914e+07	B8_20
B8	20	61	7883.1	105.2	Tox-	1.20914e+07	B8_20
B8	20	62	7217.8	111.8	Tox-	1.20914e+07	B8_20
B8	20	63	8418.7	108.5	Tox-	1.20914e+07	B8_20
B8	20	64	8978.4	108.5	Tox-	1.20914e+07	B8_20
B8	20	65	8927.9	115.1	Tox-	1.20914e+07	B8_20
B8	20	66	11293.8	121.6	Tox-	1.20914e+07	B8_20
B8	20	67	10008.8	124.9	Tox-	1.20914e+07	B8_20
B8	20	68	10688.5	118.4	Tox-	1.20914e+07	B8_20
B8	20	69	12420.3	141.4	Tox-	1.20914e+07	B8_20
B8	20	70	8430.7	105.2	Tox-	1.20914e+07	B8_20
B8	20	71	9210.1	115.1	Tox-	1.20914e+07	B8_20
B8	20	72	10088	118.4	Tox-	1.20914e+07	B8_20
B8	20	73	6509.2	105.2	Tox-	1.20914e+07	B8_20
B8	20	74	6647.3	95.3	Tox-	1.20914e+07	B8_20
B8	20	75	10793	134.8	Tox-	1.20914e+07	B8_20
B8	20	76	8688.9	108.5	Tox-	1.20914e+07	B8_20
B8	20	77	6888.7	95.3	Tox-	1.20914e+07	B8_20
B8	20	78	8863.1	118.4	Tox-	1.20914e+07	B8_20
B8	20	79	13080.8	144.7	Tox-	1.20914e+07	B8_20
B8	20	80	8688.9	108.5	Tox-	1.20914e+07	B8_20
B8	20	81	8148.5	101.9	Tox-	1.20914e+07	B8_20
B8	20	82	10390.7	118.4	Tox-	1.20914e+07	B8_20
B8	20	83	9862.3	131.5	Tox-	1.20914e+07	B8_20
B8	20	84	7646.5	101.9	Tox-	1.20914e+07	B8_20
B8	20	85	6156.1	108.5	Tox-	1.20914e+07	B8_20
B8	20	86	7646.5	101.9	Tox-	1.20914e+07	B8_20
B8	20	87	12538	134.8	Tox-	1.20914e+07	B8_20
B8	20	88	9478	118.4	Tox-	1.20914e+07	B8_20
B8	20	89	7609.3	105.2	Tox-	1.20914e+07	B8_20
B8	20	90	13909.5	138.1	Tox-	1.20914e+07	B8_20
B8	20	91	10114.5	115.1	Tox-	1.20914e+07	B8_20
B8	20	92	10647.7	124.9	Tox-	1.20914e+07	B8_20
B8	20	93	9587.2	128.2	Tox-	1.20914e+07	B8_20
B8	20	94	9528.4	111.8	Tox-	1.20914e+07	B8_20
B8	20	95	8152.1	105.2	Tox-	1.20914e+07	B8_20
B8	20	96	10044.8	121.6	Tox-	1.20914e+07	B8_20
B8	20	97	10647.7	124.9	Tox-	1.20914e+07	B8_20
B8	20	98	10044.8	121.6	Tox-	1.20914e+07	B8_20
B8	20	99	10688.5	118.4	Tox-	1.20914e+07	B8_20
B8	20	100	11839	134.8	Tox-	1.20914e+07	B8_20
B8	20	101	10088	118.4	Tox-	1.20914e+07	B8_20
B8	20	102	8084.8	111.8	Tox-	1.20914e+07	B8_20
B8	20	103	6401.1	95.3	Tox-	1.20914e+07	B8_20
B8	20	104	6941.5	111.8	Tox-	1.20914e+07	B8_20
B8	20	105	9828.6	111.8	Tox-	1.20914e+07	B8_20
B8	20	106	8148.5	101.9	Tox-	1.20914e+07	B8_20
B8	20	107	10647.7	124.9	Tox-	1.20914e+07	B8_20
B8	20	108	10044.8	121.6	Tox-	1.20914e+07	B8_20
B8	20	109	10688.5	118.4	Tox-	1.20914e+07	B8_20
B8	20	110	11839	134.8	Tox-	1.20914e+07	B8_20
B8	20	111	10088	118.4	Tox-	1.20914e+07	B8_20
B8	20	112	6647.3	95.3	Tox-	1.20914e+07	B8_20
B8	20	113	8084.8	111.8	Tox-	1.20914e+07	B8_20
B8	20	114	6401.1	95.3	Tox-	1.20914e+07	B8_20
B8	20	115	6941.5	111.8	Tox-	1.20914e+07	B8_20
B8	20	116	7138.5	98.6	Tox-	1.20914e+07	B8_20
B8	20	117	9828.6	111.8	Tox-	1.20914e+07	B8_20
B8	20	118	8148.5	101.9	Tox-	1.20914e+07	B8_20
B8	21	1	5936.4	94.2	Tox-	1.20695e+07	B8_21
B8	21	2	6276.8	98.5	Tox-	1.20695e+07	B8_21
B8	21	3	6185.7	89.8	Tox-	1.20695e+07	B8_21
B8	21	4	8185.3	116.1	Tox-	1.20695e+07	B8_21
B8	21	5	5293.8	85.4	Tox-	1.20695e+07	B8_21
B8	21	6	7533.1	109.5	Tox-	1.20695e+07	B8_21
B8	21	7	5586.3	87.6	Tox-	1.20695e+07	B8_21
B8	21	8	8871	107.3	Tox-	1.20695e+07	B8_21
B8	21	9	7303	111.7	Tox-	1.20695e+07	B8_21
B8	21	10	6487.8	94.2	Tox-	1.20695e+07	B8_21
B8	21	11	8669.6	129.2	Tox-	1.20695e+07	B8_21
B8	21	12	10563.7	120.4	Tox-	1.20695e+07	B8_21
B8	21	13	6310.4	96.4	Tox-	1.20695e+07	B8_21
B8	21	14	6276.8	98.5	Tox-	1.20695e+07	B8_21
B8	21	15	5145.2	85.4	Tox-	1.20695e+07	B8_21
B8	21	16	9954.7	131.4	Tox-	1.20695e+07	B8_21
B8	21	17	7163.9	109.5	Tox-	1.20695e+07	B8_21
B8	21	18	8511.4	120.4	Tox-	1.20695e+07	B8_21
B8	21	19	11565.8	129.2	Tox-	1.20695e+07	B8_21
B8	21	20	9767.7	118.3	Tox-	1.20695e+07	B8_21
B8	21	21	14184	144.5	Tox-	1.20695e+07	B8_21
B8	21	22	6161.7	94.2	Tox-	1.20695e+07	B8_21
B8	21	23	7873.6	120.4	Tox-	1.20695e+07	B8_21
B8	21	24	9882.8	124.8	Tox-	1.20695e+07	B8_21
B8	21	25	9316.9	120.4	Tox-	1.20695e+07	B8_21
B8	21	26	10817.8	153.3	Tox-	1.20695e+07	B8_21
B8	21	27	7101.6	111.7	Tox-	1.20695e+07	B8_21
B8	21	28	6804.3	96.4	Tox-	1.20695e+07	B8_21
B8	21	29	9062.8	122.6	Tox-	1.20695e+07	B8_21
B8	21	30	4090.2	76.6	Tox-	1.20695e+07	B8_21
B8	21	31	9048.4	109.5	Tox-	1.20695e+07	B8_21
B8	21	32	8636	135.8	Tox-	1.20695e+07	B8_21
B8	21	33	11752.9	142.3	Tox-	1.20695e+07	B8_21
B8	21	34	11915.9	135.8	Tox-	1.20695e+07	B8_21
B8	21	35	12620.8	135.8	Tox-	1.20695e+07	B8_21
B8	21	36	7533.1	109.5	Tox-	1.20695e+07	B8_21
B8	21	37	10630.8	131.4	Tox-	1.20695e+07	B8_21
B8	21	38	9355.3	118.3	Tox-	1.20695e+07	B8_21
B8	21	39	11024	142.3	Tox-	1.20695e+07	B8_21
B8	21	40	8899.8	120.4	Tox-	1.20695e+07	B8_21
B8	21	41	8899.8	120.4	Tox-	1.20695e+07	B8_21
B8	21	42	7955.1	105.1	Tox-	1.20695e+07	B8_21
B8	21	43	6320	92	Tox-	1.20695e+07	B8_21
B8	21	44	6938.6	98.5	Tox-	1.20695e+07	B8_21
B8	21	45	6914.6	100.7	Tox-	1.20695e+07	B8_21
B8	21	46	10563.7	120.4	Tox-	1.20695e+07	B8_21
B8	21	47	6310.4	96.4	Tox-	1.20695e+07	B8_21
B8	21	48	10702.7	127	Tox-	1.20695e+07	B8_21
B8	21	49	8377.1	124.8	Tox-	1.20695e+07	B8_21
B8	21	50	10314.3	124.8	Tox-	1.20695e+07	B8_21
B8	21	51	7245.4	105.1	Tox-	1.20695e+07	B8_21
B8	21	52	9355.3	118.3	Tox-	1.20695e+07	B8_21
B8	21	53	8348.3	118.3	Tox-	1.20695e+07	B8_21
B8	21	54	5466.4	96.4	Tox-	1.20695e+07	B8_21
B8	21	55	9024.4	113.9	Tox-	1.20695e+07	B8_21
B8	21	56	6780.3	116.1	Tox-	1.20695e+07	B8_21
B8	21	57	5586.3	87.6	Tox-	1.20695e+07	B8_21
B8	21	58	10779.4	120.4	Tox-	1.20695e+07	B8_21
B8	21	59	5466.4	96.4	Tox-	1.20695e+07	B8_21
B8	21	60	9412.8	111.7	Tox-	1.20695e+07	B8_21
B8	21	61	12304.3	148.9	Tox-	1.20695e+07	B8_21
B8	21	62	9954.7	131.4	Tox-	1.20695e+07	B8_21
B8	21	63	10496.5	127	Tox-	1.20695e+07	B8_21
B8	21	64	8511.4	105.1	Tox-	1.20695e+07	B8_21
B8	21	65	12467.3	127	Tox-	1.20695e+07	B8_21
B8	21	66	10184.9	116.1	Tox-	1.20695e+07	B8_21
B8	21	67	9355.3	118.3	Tox-	1.20695e+07	B8_21
B8	21	68	6487.8	94.2	Tox-	1.20695e+07	B8_21
B8	21	69	8679.2	107.3	Tox-	1.20695e+07	B8_21
B8	21	70	8257.2	111.7	Tox-	1.20695e+07	B8_21
B8	21	71	5380.1	100.7	Tox-	1.20695e+07	B8_21
B8	21	72	9590.3	116.1	Tox-	1.20695e+07	B8_21
B8	21	73	9316.9	120.4	Tox-	1.20695e+07	B8_21
B8	21	74	8832.6	146.7	Tox-	1.20695e+07	B8_21
B8	21	75	7245.4	105.1	Tox-	1.20695e+07	B8_21
B8	21	76	6487.8	94.2	Tox-	1.20695e+07	B8_21
B8	21	77	5428.1	87.6	Tox-	1.20695e+07	B8_21
B8	21	78	6967.3	96.4	Tox-	1.20695e+07	B8_21
B8	21	79	9225.8	111.7	Tox-	1.20695e+07	B8_21
B8	21	80	6813.9	94.2	Tox-	1.20695e+07	B8_21
B8	21	81	8736.7	118.3	Tox-	1.20695e+07	B8_21
B8	21	82	8046.2	113.9	Tox-	1.20695e+07	B8_21
B8	21	83	11388.4	120.4	Tox-	1.20695e+07	B8_21
B8	21	84	4339.6	78.8	Tox-	1.20695e+07	B8_21
B8	21	85	6022.7	87.6	Tox-	1.20695e+07	B8_21
B8	21	86	9480	122.6	Tox-	1.20695e+07	B8_21
B8	21	87	9048.4	109.5	Tox-	1.20695e+07	B8_21
B8	21	88	6099.4	98.5	Tox-	1.20695e+07	B8_21
B8	21	89	6022.7	87.6	Tox-	1.20695e+07	B8_21
B8	21	90	8669.6	105.1	Tox-	1.20695e+07	B8_21
B8	21	91	8300.4	109.5	Tox-	1.20695e+07	B8_21
B8	21	92	8146.9	102.9	Tox-	1.20695e+07	B8_21
B8	21	93	9245	124.8	Tox-	1.20695e+07	B8_21
B8	21	94	7245.4	113.9	Tox-	1.20695e+07	B8_21
B8	21	95	6017.9	92	Tox-	1.20695e+07	B8_21
B8	21	96	6315.2	94.2	Tox-	1.20695e+07	B8_21
B8	21	97	6415.9	100.7	Tox-	1.20695e+07	B8_21
B8	21	98	6967.3	96.4	Tox-	1.20695e+07	B8_21
B8	21	99	8070.2	111.7	Tox-	1.20695e+07	B8_21
B8	21	100	9206.6	113.9	Tox-	1.20695e+07	B8_21
B8	21	101	5744.6	85.4	Tox-	1.20695e+07	B8_21
B8	21	102	6602.9	109.5	Tox-	1.20695e+07	B8_21
B8	21	103	7561.9	107.3	Tox-	1.20695e+07	B8_21
B8	21	104	7461.2	98.5	Tox-	1.20695e+07	B8_21
B8	21	105	7533.1	109.5	Tox-	1.20695e+07	B8_21
B8	21	106	4742.4	81	Tox-	1.20695e+07	B8_21
B8	21	107	7437.2	102.9	Tox-	1.20695e+07	B8_21
B8	21	108	9225.8	111.7	Tox-	1.20695e+07	B8_21
B8	21	109	6996.1	127	Tox-	1.20695e+07	B8_21
B8	21	110	9206.6	113.9	Tox-	1.20695e+07	B8_21
B8	21	111	6156.9	92	Tox-	1.20695e+07	B8_21
B8	21	112	8185.3	116.1	Tox-	1.20695e+07	B8_21
B8	21	113	6109	118.3	Tox-	1.20695e+07	B8_21
B8	21	114	6804.3	96.4	Tox-	1.20695e+07	B8_21
B8	21	115	5190.7	105.1	Tox-	1.20695e+07	B8_21
B8	21	116	7624.3	100.7	Tox-	1.20695e+07	B8_21
B8	22	1	6939.8	100.9	Tox-	9.05842e+06	B8_22
B8	22	2	8648.3	114.1	Tox-	9.05842e+06	B8_22
B8	22	3	7652.1	114.1	Tox-	9.05842e+06	B8_22
B8	22	4	9071.8	111.9	Tox-	9.05842e+06	B8_22
B8	22	5	6944.6	103.1	Tox-	9.05842e+06	B8_22
B8	22	6	6607.7	100.9	Tox-	9.05842e+06	B8_22
B8	22	7	10000.6	118.5	Tox-	9.05842e+06	B8_22
B8	22	8	9206.6	118.5	Tox-	9.05842e+06	B8_22
B8	22	9	6987.9	94.3	Tox-	9.05842e+06	B8_22
B8	22	10	6679.9	94.3	Tox-	9.05842e+06	B8_22
B8	22	11	4085.9	79	Tox-	9.05842e+06	B8_22
B8	22	12	6049.5	89.9	Tox-	9.05842e+06	B8_22
B8	22	13	5005.1	96.5	Tox-	9.05842e+06	B8_22
B8	22	14	5751.1	87.8	Tox-	9.05842e+06	B8_22
B8	22	15	5486.4	96.5	Tox-	9.05842e+06	B8_22
B8	22	16	5472	83.4	Tox-	9.05842e+06	B8_22
B8	22	17	4774.1	79	Tox-	9.05842e+06	B8_22
B8	22	18	3970.4	76.8	Tox-	9.05842e+06	B8_22
B8	22	19	6511.5	94.3	Tox-	9.05842e+06	B8_22
B8	22	20	5746.3	100.9	Tox-	9.05842e+06	B8_22
B8	22	21	7132.3	100.9	Tox-	9.05842e+06	B8_22
B8	22	22	5881	89.9	Tox-	9.05842e+06	B8_22
B8	22	23	5794.4	98.7	Tox-	9.05842e+06	B8_22
B8	22	24	5447.9	87.8	Tox-	9.05842e+06	B8_22
B8	22	25	4759.7	81.2	Tox-	9.05842e+06	B8_22
B8	22	26	5755.9	89.9	Tox-	9.05842e+06	B8_22
B8	22	27	4355.4	79	Tox-	9.05842e+06	B8_22
B8	22	28	5664.5	96.5	Tox-	9.05842e+06	B8_22
B8	22	29	4215.9	79	Tox-	9.05842e+06	B8_22
B8	22	30	8143	107.5	Tox-	9.05842e+06	B8_22
B8	22	31	7320	100.9	Tox-	9.05842e+06	B8_22
B8	22	32	8022.7	100.9	Tox-	9.05842e+06	B8_22
B8	22	33	7835	100.9	Tox-	9.05842e+06	B8_22
B8	22	34	5881	89.9	Tox-	9.05842e+06	B8_22
B8	22	35	6208.3	92.1	Tox-	9.05842e+06	B8_22
B8	22	36	7671.3	98.7	Tox-	9.05842e+06	B8_22
B8	22	37	7478.8	114.1	Tox-	9.05842e+06	B8_22
B8	22	38	8099.7	111.9	Tox-	9.05842e+06	B8_22
B8	22	39	6506.7	92.1	Tox-	9.05842e+06	B8_22
B8	22	40	6208.3	92.1	Tox-	9.05842e+06	B8_22
B8	22	41	7835	100.9	Tox-	9.05842e+06	B8_22
B8	22	42	6039.8	92.1	Tox-	9.05842e+06	B8_22
B8	22	43	6020.6	94.3	Tox-	9.05842e+06	B8_22
B8	22	44	7320	100.9	Tox-	9.05842e+06	B8_22
B8	22	45	4759.7	81.2	Tox-	9.05842e+06	B8_22
B8	22	46	4774.1	79	Tox-	9.05842e+06	B8_22
B8	22	47	4196.6	81.2	Tox-	9.05842e+06	B8_22
B8	22	48	4341	89.9	Tox-	9.05842e+06	B8_22
B8	22	49	4499.8	76.8	Tox-	9.05842e+06	B8_22
B8	22	50	5077.3	92.1	Tox-	9.05842e+06	B8_22
B8	22	51	4894.4	81.2	Tox-	9.05842e+06	B8_22
B8	22	52	6299.7	98.7	Tox-	9.05842e+06	B8_22
B8	22	53	5958	98.7	Tox-	9.05842e+06	B8_22
B8	22	54	5452.7	85.6	Tox-	9.05842e+06	B8_22
B8	22	55	6944.6	103.1	Tox-	9.05842e+06	B8_22
B8	22	56	5751.1	87.8	Tox-	9.05842e+06	B8_22
B8	22	57	6049.5	103.1	Tox-	9.05842e+06	B8_22
B8	22	58	6343	92.1	Tox-	9.05842e+06	B8_22
B8	22	59	7753.1	109.7	Tox-	9.05842e+06	B8_22
B8	22	60	5111	109.7	Tox-	9.05842e+06	B8_22
B8	22	61	5005.1	96.5	Tox-	9.05842e+06	B8_22
B8	22	62	6679.9	94.3	Tox-	9.05842e+06	B8_22
B8	22	63	7320	100.9	Tox-	9.05842e+06	B8_22
B8	22	64	6049.5	89.9	Tox-	9.05842e+06	B8_22
B8	22	65	4774.1	79	Tox-	9.05842e+06	B8_22
B8	22	66	5601.9	85.6	Tox-	9.05842e+06	B8_22
B8	22	67	6939.8	100.9	Tox-	9.05842e+06	B8_22
B8	22	68	5154.3	87.8	Tox-	9.05842e+06	B8_22
B8	22	69	6809.9	98.7	Tox-	9.05842e+06	B8_22
B8	22	70	5977.3	96.5	Tox-	9.05842e+06	B8_22
B8	22	71	5370.9	94.3	Tox-	9.05842e+06	B8_22
B8	22	72	5698.2	94.3	Tox-	9.05842e+06	B8_22
B8	22	73	5751.1	87.8	Tox-	9.05842e+06	B8_22
B8	22	74	7652.1	100.9	Tox-	9.05842e+06	B8_22
B8	22	75	7974.5	107.5	Tox-	9.05842e+06	B8_22
B8	22	76	5005.1	85.6	Tox-	9.05842e+06	B8_22
B8	22	77	6670.3	92.1	Tox-	9.05842e+06	B8_22
B8	22	78	6992.7	109.7	Tox-	9.05842e+06	B8_22
B8	22	79	6992.7	96.5	Tox-	9.05842e+06	B8_22
B8	22	80	6039.8	92.1	Tox-	9.05842e+06	B8_22
B8	22	81	8176.7	103.1	Tox-	9.05842e+06	B8_22
B8	22	82	5245.8	92.1	Tox-	9.05842e+06	B8_22
B8	22	83	5966.5	97.6	Tox-	9.05842e+06	B8_22
B10	7	1	11219.4	2144.9	Tox+	8.99812e+06	B10_7
B10	7	2	9058	107.3	Tox+	8.99812e+06	B10_7
B10	7	3	12246.7	124.8	Tox+	8.99812e+06	B10_7
B10	7	4	22658.2	324	Tox+	8.99812e+06	B10_7
B10	7	5	34473.4	428	Tox+	8.99812e+06	B10_7
B10	7	6	45666.4	559.1	Tox+	8.99812e+06	B10_7
B10	7	7	57763.3	656.3	Tox+	8.99812e+06	B10_7
B10	7	8	70010	714	Tox+	8.99812e+06	B10_7
B10	7	9	80781.1	715.4	Tox+	8.99812e+06	B10_7
B10	7	10	91781.1	1062.7	Tox+	8.99812e+06	B10_7
B10	7	11	12473.3	125.9	Tox+	8.99812e+06	B10_7
B10	7	12	8862.6	106.2	Tox+	8.99812e+06	B10_7
B10	7	13	19435.8	743.4	Tox+	8.99812e+06	B10_7
B10	7	14	10180.1	113.9	Tox+	8.99812e+06	B10_7
B10	7	15	9615.4	110.6	Tox+	8.99812e+06	B10_7
B10	7	16	9422.4	109.5	Tox+	8.99812e+06	B10_7
B10	7	17	8329.1	102.9	Tox+	8.99812e+06	B10_7
B10	7	18	16132	1328.6	Tox+	8.99812e+06	B10_7
B10	8	1	10459.1	115.2	Tox+	1.06048e+07	B10_8
B10	8	2	12935.1	128.4	Tox+	1.06048e+07	B10_8
B10	8	3	12524.4	127.3	Tox+	1.06048e+07	B10_8
B10	8	4	9099.5	107.5	Tox+	1.06048e+07	B10_8
B10	8	5	16777.9	214.7	Tox+	1.06048e+07	B10_8
B10	8	6	10621.7	116.3	Tox+	1.06048e+07	B10_8
B10	8	7	13864.8	132.8	Tox+	1.06048e+07	B10_8
B10	9	1	10563.6	116	Tox+	1.20584e+07	B10_9
B10	9	2	19977.4	425.6	Tox+	1.20584e+07	B10_9
B10	9	3	12235.5	124.8	Tox+	1.20584e+07	B10_9
B10	9	4	10989.9	118.2	Tox+	1.20584e+07	B10_9
B10	9	5	10780.3	117.1	Tox+	1.20584e+07	B10_9
B10	9	6	11604.4	121.5	Tox+	1.20584e+07	B10_9
B10	9	7	10170.7	113.8	Tox+	1.20584e+07	B10_9
B10	9	8	17869.4	203.9	Tox+	1.20584e+07	B10_9
B10	9	9	11604.4	121.5	Tox+	1.20584e+07	B10_9
B10	9	10	25143	1346.4	Tox+	1.20584e+07	B10_9
B10	9	11	35923.3	1576.6	Tox+	1.20584e+07	B10_9
B10	9	12	9989.9	112.7	Tox+	1.20584e+07	B10_9
B10	9	13	19979.8	442.5	Tox+	1.20584e+07	B10_9
B10	9	14	30381.6	2221	Tox+	1.20584e+07	B10_9
B10	9	15	10170.7	113.8	Tox+	1.20584e+07	B10_9
B10	9	16	8321.5	102.9	Tox+	1.20584e+07	B10_9
B10	9	17	9801.8	111.6	Tox+	1.20584e+07	B10_9
B10	9	18	9606.6	110.5	Tox+	1.20584e+07	B10_9
B10	9	19	9228.1	108.3	Tox+	1.20584e+07	B10_9
B10	9	20	14675.2	297.8	Tox+	1.20584e+07	B10_9
B10	9	21	8126.3	101.8	Tox+	1.20584e+07	B10_9
B10	9	22	11378	120.4	Tox+	1.20584e+07	B10_9
B10	9	23	10989.9	118.2	Tox+	1.20584e+07	B10_9
B10	9	24	9989.9	112.7	Tox+	1.20584e+07	B10_9
B10	9	25	19039.6	636.4	Tox+	1.20584e+07	B10_9
B10	9	26	9801.8	111.6	Tox+	1.20584e+07	B10_9
B10	9	27	17788	262.5	Tox+	1.20584e+07	B10_9
B10	9	28	29392.3	456.9	Tox+	1.20584e+07	B10_9
B10	9	29	9049.7	107.3	Tox+	1.20584e+07	B10_9
B10	9	30	10170.7	113.8	Tox+	1.20584e+07	B10_9
B10	10	1	8163.5	102	Tox+	1.21136e+07	B10_10
B10	10	2	16523.1	722.8	Tox+	1.21136e+07	B10_10
B10	10	3	7484.9	97.6	Tox+	1.21136e+07	B10_10
B10	10	4	10829.7	117.4	Tox+	1.21136e+07	B10_10
B10	10	5	9091.1	107.5	Tox+	1.21136e+07	B10_10
B10	10	6	9091.1	107.5	Tox+	1.21136e+07	B10_10
B10	10	7	12519	126.1	Tox+	1.21136e+07	B10_10
B10	10	8	10611.9	116.3	Tox+	1.21136e+07	B10_10
B10	10	9	21223.9	606.6	Tox+	1.21136e+07	B10_10
B10	10	10	12729.5	127.2	Tox+	1.21136e+07	B10_10
B10	10	11	13600.6	131.6	Tox+	1.21136e+07	B10_10
B10	10	12	9992.3	117.4	Tox+	1.21136e+07	B10_10
B10	10	13	10611.9	116.3	Tox+	1.21136e+07	B10_10
B10	10	14	19507	229.9	Tox+	1.21136e+07	B10_10
B10	10	15	27363.7	312.3	Tox+	1.21136e+07	B10_10
B10	10	16	9456.9	109.7	Tox+	1.21136e+07	B10_10
B10	10	17	19674.2	308.7	Tox+	1.21136e+07	B10_10
B10	10	18	14553.5	136	Tox+	1.21136e+07	B10_10
B10	10	19	12066.6	123.9	Tox+	1.21136e+07	B10_10
B10	10	20	12519	126.1	Tox+	1.21136e+07	B10_10
B10	10	21	10611.9	116.3	Tox+	1.21136e+07	B10_10
B10	10	22	23070.8	240.3	Tox+	1.21136e+07	B10_10
B10	10	23	11657.5	121.8	Tox+	1.21136e+07	B10_10
B10	10	24	22697.8	1020.5	Tox+	1.21136e+07	B10_10
B10	10	25	10217.3	114.1	Tox+	1.21136e+07	B10_10
B10	10	26	12519	126.1	Tox+	1.21136e+07	B10_10
B10	10	27	9456.9	109.7	Tox+	1.21136e+07	B10_10
B10	10	28	13186.7	129.4	Tox+	1.21136e+07	B10_10
B10	10	29	13394.9	130.5	Tox+	1.21136e+07	B10_10
B10	10	30	8359.6	103.1	Tox+	1.21136e+07	B10_10
B10	10	31	10829.7	117.4	Tox+	1.21136e+07	B10_10
B10	11	1	7864	3349.5	Tox+	1.02023e+07	B10_11
B10	11	2	7457.6	97.4	Tox+	1.02023e+07	B10_11
B10	11	3	13054.8	1372.1	Tox+	1.02023e+07	B10_11
B10	11	4	22291.4	3307	Tox+	1.02023e+07	B10_11
B10	11	5	9810.9	111.7	Tox+	1.02023e+07	B10_11
B10	11	6	9422.5	109.5	Tox+	1.02023e+07	B10_11
B10	11	7	11388.5	120.4	Tox+	1.02023e+07	B10_11
B10	11	8	10573.3	116.1	Tox+	1.02023e+07	B10_11
B10	11	9	10411.5	115	Tox+	1.02023e+07	B10_11
B10	11	10	10790.3	117.2	Tox+	1.02023e+07	B10_11
B10	11	11	7141.2	95.3	Tox+	1.02023e+07	B10_11
B10	11	12	11615	121.5	Tox+	1.02023e+07	B10_11
B10	11	13	11615	121.5	Tox+	1.02023e+07	B10_11
B10	11	14	9422.5	109.5	Tox+	1.02023e+07	B10_11
B10	11	15	13346.1	130.3	Tox+	1.02023e+07	B10_11
B10	11	16	25917.7	235	Tox+	1.02023e+07	B10_11
B10	11	17	11615	121.5	Tox+	1.02023e+07	B10_11
B10	11	18	18918	1829.6	Tox+	1.02023e+07	B10_11
B10	11	19	9236.6	108.4	Tox+	1.02023e+07	B10_11
B10	11	20	12473.4	125.9	Tox+	1.02023e+07	B10_11
B10	11	21	12473.4	125.9	Tox+	1.02023e+07	B10_11
B10	12	1	9810.6	111.7	Tox+	1.20691e+07	B10_12
B10	12	2	9236.4	108.4	Tox+	1.20691e+07	B10_12
B10	12	3	10179.8	113.9	Tox+	1.20691e+07	B10_12
B10	12	4	10179.8	113.9	Tox+	1.20691e+07	B10_12
B10	12	5	9422.2	109.5	Tox+	1.20691e+07	B10_12
B10	12	6	12473	125.9	Tox+	1.20691e+07	B10_12
B10	12	7	10573	116.1	Tox+	1.20691e+07	B10_12
B10	12	8	12682.8	127	Tox+	1.20691e+07	B10_12
B10	12	9	8328.9	102.9	Tox+	1.20691e+07	B10_12
B10	12	10	8328.9	102.9	Tox+	1.20691e+07	B10_12
B10	12	11	14006.2	133.6	Tox+	1.20691e+07	B10_12
B10	12	12	20968.5	564	Tox+	1.20691e+07	B10_12
B10	12	13	6022.5	87.6	Tox+	1.20691e+07	B10_12
B10	12	14	10789.9	117.2	Tox+	1.20691e+07	B10_12
B10	12	15	18923.5	222.3	Tox+	1.20691e+07	B10_12
B10	12	16	9615.2	110.6	Tox+	1.20691e+07	B10_12
B10	12	17	10573	116.1	Tox+	1.20691e+07	B10_12
B10	12	18	9236.4	108.4	Tox+	1.20691e+07	B10_12
B10	12	19	12022.3	123.7	Tox+	1.20691e+07	B10_12
B10	12	20	9236.4	108.4	Tox+	1.20691e+07	B10_12
B10	12	21	12022.3	123.7	Tox+	1.20691e+07	B10_12
B10	12	22	10179.8	113.9	Tox+	1.20691e+07	B10_12
B10	12	23	10573	116.1	Tox+	1.20691e+07	B10_12
B10	12	24	8133.5	101.8	Tox+	1.20691e+07	B10_12
B10	12	25	15936.2	220.2	Tox+	1.20691e+07	B10_12
B10	12	26	10999.7	118.2	Tox+	1.20691e+07	B10_12
B10	12	27	13345.7	130.3	Tox+	1.20691e+07	B10_12
B10	12	28	13345.7	130.3	Tox+	1.20691e+07	B10_12
B10	12	29	9615.2	110.6	Tox+	1.20691e+07	B10_12
B10	12	30	11614.7	121.5	Tox+	1.20691e+07	B10_12
B10	12	31	10789.9	117.2	Tox+	1.20691e+07	B10_12
B10	12	32	12682.8	127	Tox+	1.20691e+07	B10_12
B10	12	33	14242.3	134.7	Tox+	1.20691e+07	B10_12
B10	12	34	14721.8	136.9	Tox+	1.20691e+07	B10_12
B10	12	35	26968.3	834.6	Tox+	1.20691e+07	B10_12
B10	13	1	10960	118	Tox+	1.14645e+07	B10_13
B10	13	2	11347	120.2	Tox+	1.14645e+07	B10_13
B10	13	3	19814.2	521.7	Tox+	1.14645e+07	B10_13
B10	13	4	29202.4	521.7	Tox+	1.14645e+07	B10_13
B10	13	5	39165	751.5	Tox+	1.14645e+07	B10_13
B10	13	6	49916	1726.5	Tox+	1.14645e+07	B10_13
B10	13	7	59496.4	1849.6	Tox+	1.14645e+07	B10_13
B10	13	8	71069.2	1849.6	Tox+	1.14645e+07	B10_13
B10	13	9	11152.3	119.1	Tox+	1.14645e+07	B10_13
B10	13	10	13297.5	130.1	Tox+	1.14645e+07	B10_13
B10	13	11	8298.8	102.7	Tox+	1.14645e+07	B10_13
B10	13	12	11347	120.2	Tox+	1.14645e+07	B10_13
B10	13	13	12427.9	125.7	Tox+	1.14645e+07	B10_13
B10	13	14	11978.8	123.5	Tox+	1.14645e+07	B10_13
B10	13	15	10534.8	115.8	Tox+	1.14645e+07	B10_13
B10	13	16	8467.2	103.8	Tox+	1.14645e+07	B10_13
B10	15	1	10733	116.9	Tox+	1.20255e+07	B10_15
B10	15	2	6381.8	103.8	Tox+	1.20255e+07	B10_15
B10	15	3	5692.6	98.4	Tox+	1.20255e+07	B10_15
B10	15	4	8467.2	103.8	Tox+	1.20255e+07	B10_15
B10	15	5	12829.2	127.9	Tox+	1.20255e+07	B10_15
B10	15	6	10960	118	Tox+	1.20255e+07	B10_15
B10	15	7	25407.7	284.9	Tox+	1.20255e+07	B10_15
B10	15	8	29632.3	289.8	Tox+	1.20255e+07	B10_15
B10	15	9	9580.4	110.4	Tox+	1.20255e+07	B10_15
B10	15	10	11978.8	123.5	Tox+	1.20255e+07	B10_15
B10	15	11	23751	401.1	Tox+	1.20255e+07	B10_15
B10	15	12	32218.2	401.1	Tox+	1.20255e+07	B10_15
B10	15	13	13297.5	130.1	Tox+	1.20255e+07	B10_15
B10	15	14	8467.2	103.8	Tox+	1.20255e+07	B10_15
B10	15	15	7964.4	100.5	Tox+	1.20255e+07	B10_15
B10	15	16	15240.8	212.2	Tox+	1.20255e+07	B10_15
B10	15	17	27219.6	479.3	Tox+	1.20255e+07	B10_15
B10	15	18	37091.5	555.1	Tox+	1.20255e+07	B10_15
B10	15	19	48243.7	555.1	Tox+	1.20255e+07	B10_15
B10	15	20	55185.7	555.1	Tox+	1.20255e+07	B10_15
B10	15	21	13751.3	132.2	Tox+	1.20255e+07	B10_15
B10	15	22	13297.5	130.1	Tox+	1.20255e+07	B10_15
B10	15	23	12427.9	125.7	Tox+	1.20255e+07	B10_15
B10	15	24	24000.6	1546.7	Tox+	1.20255e+07	B10_15
B10	15	25	36202.8	1886.5	Tox+	1.20255e+07	B10_15
B10	15	26	47283.4	1905.9	Tox+	1.20255e+07	B10_15
B10	15	27	13501.7	131.1	Tox+	1.20255e+07	B10_15
B10	15	28	24036.5	330.7	Tox+	1.20255e+07	B10_15
B10	15	29	11978.8	123.5	Tox+	1.20255e+07	B10_15
B10	15	30	12829.2	127.9	Tox+	1.20255e+07	B10_15
B10	15	31	27020.1	424.3	Tox+	1.20255e+07	B10_15
B10	15	32	10534.8	115.8	Tox+	1.20255e+07	B10_15
B10	15	33	10960	118	Tox+	1.20255e+07	B10_15
B10	15	34	23387.9	288.7	Tox+	1.20255e+07	B10_15
B10	15	35	12427.9	125.7	Tox+	1.20255e+07	B10_15
B10	15	36	10534.8	115.8	Tox+	1.20255e+07	B10_15
B10	15	37	11978.8	123.5	Tox+	1.20255e+07	B10_15
B10	15	38	21036.1	227	Tox+	1.20255e+07	B10_15
B10	15	39	33014.9	341.6	Tox+	1.20255e+07	B10_15
B10	15	40	7167.7	99.5	Tox+	1.20255e+07	B10_15
B10	15	41	10143	113.7	Tox+	1.20255e+07	B10_15
B10	15	42	13297.5	130.1	Tox+	1.20255e+07	B10_15
B10	15	43	11572.7	121.3	Tox+	1.20255e+07	B10_15
B10	15	44	26020.4	2846.7	Tox+	1.20255e+07	B10_15
B10	15	45	36771.4	2846.7	Tox+	1.20255e+07	B10_15
B10	15	46	45796.4	2846.7	Tox+	1.20255e+07	B10_15
B10	15	47	57926.9	2846.7	Tox+	1.20255e+07	B10_15
B10	15	48	10534.8	115.8	Tox+	1.20255e+07	B10_15
B10	15	49	20677.8	285.9	Tox+	1.20255e+07	B10_15
B10	15	50	31212.5	327.2	Tox+	1.20255e+07	B10_15
B10	15	51	14447.7	135.5	Tox+	1.20255e+07	B10_15
B10	15	52	28613.5	260.2	Tox+	1.20255e+07	B10_15
B10	15	53	39575.8	340	Tox+	1.20255e+07	B10_15
B10	15	54	11978.8	123.5	Tox+	1.20255e+07	B10_15
B10	15	55	10143	113.7	Tox+	1.20255e+07	B10_15
B10	15	56	8830.3	106	Tox+	1.20255e+07	B10_15
B10	15	57	13955.6	133.3	Tox+	1.20255e+07	B10_15
B10	15	58	10143	113.7	Tox+	1.20255e+07	B10_15
B10	15	59	10534.8	115.8	Tox+	1.20255e+07	B10_15
B10	15	60	22307	325	Tox+	1.20255e+07	B10_15
B10	15	61	36058.3	586.6	Tox+	1.20255e+07	B10_15
B10	15	62	9962.6	112.6	Tox+	1.20255e+07	B10_15
B10	15	63	19543.1	237.2	Tox+	1.20255e+07	B10_15
B10	15	64	31661.6	302.5	Tox+	1.20255e+07	B10_15
B10	15	65	13955.6	133.3	Tox+	1.20255e+07	B10_15
B10	15	66	13501.7	131.1	Tox+	1.20255e+07	B10_15
B10	15	67	27001	263	Tox+	1.20255e+07	B10_15
B10	15	68	38979.8	751	Tox+	1.20255e+07	B10_15
B10	15	69	9775.1	111.5	Tox+	1.20255e+07	B10_15
B10	15	70	11978.8	123.5	Tox+	1.20255e+07	B10_15
B10	15	71	22352.3	1699.6	Tox+	1.20255e+07	B10_15
B10	15	72	11978.8	123.5	Tox+	1.20255e+07	B10_15
B10	15	73	11572.7	121.3	Tox+	1.20255e+07	B10_15
B10	15	74	14920.7	137.7	Tox+	1.20255e+07	B10_15
B10	14	1	9051.3	3339.2	Tox+	1.20255e+07	B10_14
B10	14	2	17689.3	3339.2	Tox+	1.20255e+07	B10_14
B10	14	3	25463.8	3339.2	Tox+	1.20255e+07	B10_14
B10	14	4	9203	108.2	Tox+	1.20255e+07	B10_14
B10	14	5	15376.9	266.2	Tox+	1.20255e+07	B10_14
B10	14	6	26336.9	432.7	Tox+	1.20255e+07	B10_14
B10	14	7	33952.5	531.4	Tox+	1.20255e+07	B10_14
B10	14	8	44326.1	1029.6	Tox+	1.20255e+07	B10_14
B10	14	9	10143	113.7	Tox+	1.20255e+07	B10_14
B10	14	10	11152.3	119.1	Tox+	1.20255e+07	B10_14
B10	14	11	8467.2	103.8	Tox+	1.20255e+07	B10_14
B10	14	12	7774.5	99.5	Tox+	1.20255e+07	B10_14
B10	14	13	10143	113.7	Tox+	1.20255e+07	B10_14
B10	14	14	11572.7	121.3	Tox+	1.20255e+07	B10_14
B10	14	15	10143	113.7	Tox+	1.20255e+07	B10_14
B10	14	16	8467.2	103.8	Tox+	1.20255e+07	B10_14
B10	14	17	10751	116.9	Tox+	1.20255e+07	B10_14
B10	14	18	9203	108.2	Tox+	1.20255e+07	B10_14
B10	14	19	8467.2	103.8	Tox+	1.20255e+07	B10_14
B10	14	20	16082.8	212.3	Tox+	1.20255e+07	B10_14
B10	14	21	12202.2	124.6	Tox+	1.20255e+07	B10_14
B10	14	22	10751	116.9	Tox+	1.20255e+07	B10_14
B10	14	23	10534.8	115.8	Tox+	1.20255e+07	B10_14
B10	14	24	7115.1	95.1	Tox+	1.20255e+07	B10_14
B10	14	25	19094	339.2	Tox+	1.20255e+07	B10_14
B10	14	26	13090.8	129	Tox+	1.20255e+07	B10_14
B10	14	27	24001.8	235.8	Tox+	1.20255e+07	B10_14
B10	14	28	9775.1	111.5	Tox+	1.20255e+07	B10_14
B10	14	29	13751.3	132.2	Tox+	1.20255e+07	B10_14
B10	14	30	23894.3	566.8	Tox+	1.20255e+07	B10_14
B10	14	31	29895.1	672.3	Tox+	1.20255e+07	B10_14
B10	14	32	41047.4	1783.4	Tox+	1.20255e+07	B10_14
B10	14	33	52199.7	1783.4	Tox+	1.20255e+07	B10_14
B10	14	34	70569.8	1783.4	Tox+	1.20255e+07	B10_14
B10	14	35	8104.1	101.6	Tox+	1.20255e+07	B10_14
B10	14	36	12427.9	125.7	Tox+	1.20255e+07	B10_14
B10	14	37	10534.8	115.8	Tox+	1.20255e+07	B10_14
B10	14	38	18150.4	313.5	Tox+	1.20255e+07	B10_14
B10	14	39	9203	108.2	Tox+	1.20255e+07	B10_14
B10	14	40	21839.9	1018.2	Tox+	1.20255e+07	B10_14
B10	14	41	32992.2	2860.9	Tox+	1.20255e+07	B10_14
B10	14	42	44764.4	2860.9	Tox+	1.20255e+07	B10_14
B10	14	43	55515.4	2860.9	Tox+	1.20255e+07	B10_14
B10	14	44	9025	107.1	Tox+	1.20255e+07	B10_14
B10	26	1	11834.1	3470.5	Tox+	1.20691e+07	B10_26
B10	26	2	19967.6	3709.4	Tox+	1.20691e+07	B10_26
B10	26	3	8324.1	105.1	Tox+	1.20691e+07	B10_26
B10	26	4	24009.8	1165.5	Tox+	1.20691e+07	B10_26
B10	26	5	11388.1	120.4	Tox+	1.20691e+07	B10_26
B10	26	6	12022.3	123.7	Tox+	1.20691e+07	B10_26
B10	26	7	12875.8	128.1	Tox+	1.20691e+07	B10_26
B10	26	8	12022.3	123.7	Tox+	1.20691e+07	B10_26
B10	26	9	9998.8	112.8	Tox+	1.20691e+07	B10_26
B10	26	10	12246.4	124.8	Tox+	1.20691e+07	B10_26
B10	26	11	9810.6	111.7	Tox+	1.20691e+07	B10_26
B10	26	12	10999.7	118.2	Tox+	1.20691e+07	B10_26
B10	26	13	12473	125.9	Tox+	1.20691e+07	B10_26
B10	26	14	9810.6	111.7	Tox+	1.20691e+07	B10_26
B10	26	15	12022.3	123.7	Tox+	1.20691e+07	B10_26
B10	26	16	13345.7	130.3	Tox+	1.20691e+07	B10_26
B10	26	17	10411.1	115	Tox+	1.20691e+07	B10_26
B10	26	18	14721.8	136.9	Tox+	1.20691e+07	B10_26
B10	26	19	14006.2	133.6	Tox+	1.20691e+07	B10_26
B10	26	20	13550.7	131.4	Tox+	1.20691e+07	B10_26
B10	26	21	11614.7	121.5	Tox+	1.20691e+07	B10_26
B10	26	22	12022.3	123.7	Tox+	1.20691e+07	B10_26
B10	26	23	13345.7	130.3	Tox+	1.20691e+07	B10_26
B10	26	24	14242.3	134.7	Tox+	1.20691e+07	B10_26
B10	26	25	13550.7	131.4	Tox+	1.20691e+07	B10_26
B10	26	26	14006.2	133.6	Tox+	1.20691e+07	B10_26
B10	26	27	12022.3	123.7	Tox+	1.20691e+07	B10_26
B10	26	28	13801.2	132.5	Tox+	1.20691e+07	B10_26
B10	26	29	10411.1	115	Tox+	1.20691e+07	B10_26
B10	26	30	9236.4	108.4	Tox+	1.20691e+07	B10_26
B10	26	31	7457.4	97.4	Tox+	1.20691e+07	B10_26
B10	26	32	7802.7	99.6	Tox+	1.20691e+07	B10_26
B10	26	33	10999.7	118.2	Tox+	1.20691e+07	B10_26
B10	26	34	8497.9	104	Tox+	1.20691e+07	B10_26
B10	26	35	7302.8	96.3	Tox+	1.20691e+07	B10_26
B10	26	36	11388.1	120.4	Tox+	1.20691e+07	B10_26
B10	26	37	6334.2	89.8	Tox+	1.20691e+07	B10_26
B10	26	38	9810.6	111.7	Tox+	1.20691e+07	B10_26
B10	26	39	8133.5	101.8	Tox+	1.20691e+07	B10_26
B10	26	40	7141	95.3	Tox+	1.20691e+07	B10_26
B10	26	41	9615.2	110.6	Tox+	1.20691e+07	B10_26
B10	26	42	10179.8	113.9	Tox+	1.20691e+07	B10_26
B10	26	43	13138.3	129.2	Tox+	1.20691e+07	B10_26
B10	26	44	10179.8	113.9	Tox+	1.20691e+07	B10_26
B10	26	45	9236.4	108.4	Tox+	1.20691e+07	B10_26
B10	26	46	9810.6	111.7	Tox+	1.20691e+07	B10_26
B10	26	47	11192.7	119.3	Tox+	1.20691e+07	B10_26
B10	26	48	8862.4	106.2	Tox+	1.20691e+07	B10_26
B10	26	49	12682.8	127	Tox+	1.20691e+07	B10_26
B10	26	50	9810.6	111.7	Tox+	1.20691e+07	B10_26
B10	26	51	8328.9	102.9	Tox+	1.20691e+07	B10_26
B10	26	52	9810.6	111.7	Tox+	1.20691e+07	B10_26
B10	26	53	8862.4	106.2	Tox+	1.20691e+07	B10_26
B10	26	54	12022.3	123.7	Tox+	1.20691e+07	B10_26
B10	26	55	14006.2	133.6	Tox+	1.20691e+07	B10_26
B10	26	56	11192.7	119.3	Tox+	1.20691e+07	B10_26
B10	26	57	11371.3	120.4	Tox+	1.20691e+07	B10_26
B10	26	58	11614.7	121.5	Tox+	1.20691e+07	B10_26
B10	26	59	9615.2	110.6	Tox+	1.20691e+07	B10_26
B10	26	60	10179.8	113.9	Tox+	1.20691e+07	B10_26
B10	26	61	11614.7	121.5	Tox+	1.20691e+07	B10_26
B10	26	62	13345.7	130.3	Tox+	1.20691e+07	B10_26
B10	26	63	9422.2	109.5	Tox+	1.20691e+07	B10_26
B10	26	64	6334.2	89.8	Tox+	1.20691e+07	B10_26
B10	26	65	8328.9	102.9	Tox+	1.20691e+07	B10_26
B10	17	1	12590.9	126.5	Tox+	1.19817e+07	B10_17
B10	17	2	12782.5	127.6	Tox+	1.19817e+07	B10_17
B10	17	3	7587.9	98.2	Tox+	1.19817e+07	B10_17
B10	17	4	8798.2	105.8	Tox+	1.19817e+07	B10_17
B10	17	5	8992.1	106.9	Tox+	1.19817e+07	B10_17
B10	17	6	10496.4	115.6	Tox+	1.19817e+07	B10_17
B10	17	7	9739.5	111.3	Tox+	1.19817e+07	B10_17
B10	17	8	8798.2	105.8	Tox+	1.19817e+07	B10_17
B10	17	9	7587.9	98.2	Tox+	1.19817e+07	B10_17
B10	17	10	8606.6	104.7	Tox+	1.19817e+07	B10_17
B10	17	11	8798.2	105.8	Tox+	1.19817e+07	B10_17
B10	17	12	9353.9	109.1	Tox+	1.19817e+07	B10_17
B10	17	13	7746.1	99.3	Tox+	1.19817e+07	B10_17
B10	17	14	10711.8	116.7	Tox+	1.19817e+07	B10_17
B10	17	15	10920.1	117.8	Tox+	1.19817e+07	B10_17
B10	17	16	8268.6	102.5	Tox+	1.19817e+07	B10_17
B10	17	17	10496.4	115.6	Tox+	1.19817e+07	B10_17
B10	17	18	15048.4	138.5	Tox+	1.19817e+07	B10_17
B10	17	19	11305.6	120	Tox+	1.19817e+07	B10_17
B10	17	20	9739.5	111.3	Tox+	1.19817e+07	B10_17
B10	17	21	12382.6	125.5	Tox+	1.19817e+07	B10_17
B10	17	22	11935.2	123.3	Tox+	1.19817e+07	B10_17
B10	17	23	9545.5	110.2	Tox+	1.19817e+07	B10_17
B10	17	24	12590.9	126.5	Tox+	1.19817e+07	B10_17
B10	17	25	9926.3	112.4	Tox+	1.19817e+07	B10_17
B10	17	26	9169.5	108	Tox+	1.19817e+07	B10_17
B10	17	27	11935.2	123.3	Tox+	1.19817e+07	B10_17
B10	17	28	13904.7	133.1	Tox+	1.19817e+07	B10_17
B10	17	29	8436.4	103.6	Tox+	1.19817e+07	B10_17
B10	17	30	13452.5	130.9	Tox+	1.19817e+07	B10_17
B10	17	31	11111.7	118.9	Tox+	1.19817e+07	B10_17
B10	17	32	13725	228.8	Tox+	1.19817e+07	B10_17
B10	17	33	8436.4	103.6	Tox+	1.19817e+07	B10_17
B10	17	34	20819	544.7	Tox+	1.19817e+07	B10_17
B10	17	35	9545.5	110.2	Tox+	1.19817e+07	B10_17
B10	17	36	12157.7	124.4	Tox+	1.19817e+07	B10_17
B10	17	37	11305.6	120	Tox+	1.19817e+07	B10_17
B10	17	38	26648	483.5	Tox+	1.19817e+07	B10_17
B10	17	39	10920.1	117.8	Tox+	1.19817e+07	B10_17
B10	17	40	10496.4	115.6	Tox+	1.19817e+07	B10_17
B10	17	41	18932.8	317	Tox+	1.19817e+07	B10_17
B10	17	42	11530.6	121.1	Tox+	1.19817e+07	B10_17
B10	17	43	24983.1	285.7	Tox+	1.19817e+07	B10_17
B10	17	44	10335.7	114.5	Tox+	1.19817e+07	B10_17
B10	17	45	23378.9	360.5	Tox+	1.19817e+07	B10_17
B10	17	46	8074.6	101.5	Tox+	1.19817e+07	B10_17
B10	17	47	17428.5	244.7	Tox+	1.19817e+07	B10_17
B10	17	48	6597.7	91.6	Tox+	1.19817e+07	B10_17
B10	17	49	8074.6	101.5	Tox+	1.19817e+07	B10_17
B10	17	50	15163.8	275.2	Tox+	1.19817e+07	B10_17
B10	17	51	25269.9	3091.6	Tox+	1.19817e+07	B10_17
B10	17	52	33205.2	3118.5	Tox+	1.19817e+07	B10_17
B10	17	53	10920.1	117.8	Tox+	1.19817e+07	B10_17
B10	19	1	13249	129.8	Tox+	8.8423e+06	B10_19
B10	19	2	10496.4	115.6	Tox+	8.8423e+06	B10_19
B10	19	3	9169.5	108	Tox+	8.8423e+06	B10_19
B10	19	4	12382.6	125.5	Tox+	8.8423e+06	B10_19
B10	19	5	15572	140.7	Tox+	8.8423e+06	B10_19
B10	19	6	13043.1	128.7	Tox+	8.8423e+06	B10_19
B10	19	7	15342.3	139.6	Tox+	8.8423e+06	B10_19
B10	19	8	12782.5	127.6	Tox+	8.8423e+06	B10_19
B10	19	9	13043.1	128.7	Tox+	8.8423e+06	B10_19
B10	19	10	25425.8	256.2	Tox+	8.8423e+06	B10_19
B10	19	11	10496.4	115.6	Tox+	8.8423e+06	B10_19
B10	19	12	22026.9	433.1	Tox+	8.8423e+06	B10_19
B10	19	13	10335.7	114.5	Tox+	8.8423e+06	B10_19
B10	19	14	21447.4	592.4	Tox+	8.8423e+06	B10_19
B10	19	15	7746.1	99.3	Tox+	8.8423e+06	B10_19
B10	19	16	12782.5	127.6	Tox+	8.8423e+06	B10_19
B10	19	17	9739.5	111.3	Tox+	8.8423e+06	B10_19
B10	19	18	13904.7	133.1	Tox+	8.8423e+06	B10_19
B10	19	19	20469.2	161.5	Tox+	8.8423e+06	B10_19
B10	19	20	10929.6	126.5	Tox+	8.8423e+06	B10_19
B10	19	21	16048.1	142.9	Tox+	8.8423e+06	B10_19
B10	20	1	13011.6	131.4	Tox+	1.09928e+07	B10_20
B10	20	2	12473.3	125.9	Tox+	1.09928e+07	B10_20
B10	20	3	24946.6	406.1	Tox+	1.09928e+07	B10_20
B10	20	4	33444.8	531	Tox+	1.09928e+07	B10_20
B10	20	5	44018	556.4	Tox+	1.09928e+07	B10_20
B10	20	6	15454.7	140.1	Tox+	1.09928e+07	B10_20
B10	20	7	10180.1	113.9	Tox+	1.09928e+07	B10_20
B10	20	8	19990.9	993.7	Tox+	1.09928e+07	B10_20
B10	20	9	32464.2	1263.5	Tox+	1.09928e+07	B10_20
B10	20	10	15158.6	139.1	Tox+	1.09928e+07	B10_20
B10	20	11	11815.2	122.6	Tox+	1.09928e+07	B10_20
B10	20	12	12022.6	123.7	Tox+	1.09928e+07	B10_20
B10	20	13	21445	259.4	Tox+	1.09928e+07	B10_20
B10	20	14	31728.1	259.4	Tox+	1.09928e+07	B10_20
B10	20	15	11000	118.2	Tox+	1.09928e+07	B10_20
B10	20	16	25006.6	839.1	Tox+	1.09928e+07	B10_20
B10	20	17	12683.1	127	Tox+	1.09928e+07	B10_20
B10	20	18	12876.1	128.1	Tox+	1.09928e+07	B10_20
B10	20	19	24491.1	1870.7	Tox+	1.09928e+07	B10_20
B10	20	20	37367.2	1870.7	Tox+	1.09928e+07	B10_20
B10	20	21	11615	121.5	Tox+	1.09928e+07	B10_20
B10	20	22	12876.1	128.1	Tox+	1.09928e+07	B10_20
B10	20	23	14006.6	133.6	Tox+	1.09928e+07	B10_20
B10	20	24	26479.9	1033.2	Tox+	1.09928e+07	B10_20
B10	20	25	10573.3	116.1	Tox+	1.09928e+07	B10_20
B10	20	26	14006.6	133.6	Tox+	1.09928e+07	B10_20
B10	20	27	16673.8	145.6	Tox+	1.09928e+07	B10_20
B10	20	28	14006.6	133.6	Tox+	1.09928e+07	B10_20
B10	20	29	11615	121.5	Tox+	1.09928e+07	B10_20
B10	20	30	14006.6	133.6	Tox+	1.09928e+07	B10_20
B10	20	31	14975.2	138	Tox+	1.09928e+07	B10_20
B10	20	32	10790.2	117.2	Tox+	1.09928e+07	B10_20
B10	20	33	29798.1	1149	Tox+	1.09928e+07	B10_20
B10	20	34	19819.5	158.8	Tox+	1.09928e+07	B10_20
B10	20	35	14722.2	136.9	Tox+	1.09928e+07	B10_20
B10	20	36	13801.6	132.5	Tox+	1.09928e+07	B10_20
B10	20	37	12022.6	123.7	Tox+	1.09928e+07	B10_20
B10	20	38	12473.3	125.9	Tox+	1.09928e+07	B10_20
B10	20	39	23263.5	313.4	Tox+	1.09928e+07	B10_20
B10	22	1	12637	126.8	Tox+	1.20256e+07	B10_22
B10	22	2	24209.7	394.1	Tox+	1.20256e+07	B10_22
B10	22	3	16613.2	145.4	Tox+	1.20256e+07	B10_22
B10	22	4	18370.2	153	Tox+	1.20256e+07	B10_22
B10	22	5	10143	113.7	Tox+	1.20256e+07	B10_22
B10	22	6	23894.4	363.6	Tox+	1.20256e+07	B10_22
B10	22	7	11978.9	123.5	Tox+	1.20256e+07	B10_22
B10	22	8	15398.5	139.9	Tox+	1.20256e+07	B10_22
B10	22	9	27377.3	333.5	Tox+	1.20256e+07	B10_22
B10	22	10	41333	1425.3	Tox+	1.20256e+07	B10_22
B10	22	11	12428	125.7	Tox+	1.20256e+07	B10_22
B10	22	12	23580.3	420.3	Tox+	1.20256e+07	B10_22
B10	22	13	36008.2	833	Tox+	1.20256e+07	B10_22
B10	22	14	13090.9	129	Tox+	1.20256e+07	B10_22
B10	22	15	13090.9	129	Tox+	1.20256e+07	B10_22
B10	22	16	11152.3	119.1	Tox+	1.20256e+07	B10_22
B10	22	17	11572.8	121.3	Tox+	1.20256e+07	B10_22
B10	22	18	23345	645.8	Tox+	1.20256e+07	B10_22
B10	22	19	8638.1	104.9	Tox+	1.20256e+07	B10_22
B10	22	20	11772.2	122.4	Tox+	1.20256e+07	B10_22
B10	22	21	8467.3	103.8	Tox+	1.20256e+07	B10_22
B10	22	22	11978.9	123.5	Tox+	1.20256e+07	B10_22
B10	22	23	24808.1	417.7	Tox+	1.20256e+07	B10_22
B10	22	24	11772.2	122.4	Tox+	1.20256e+07	B10_22
B10	22	25	20602.6	1992.4	Tox+	1.20256e+07	B10_22
B10	22	26	11152.3	119.1	Tox+	1.20256e+07	B10_22
B10	22	27	11152.3	119.1	Tox+	1.20256e+07	B10_22
B10	22	28	16613.2	145.4	Tox+	1.20256e+07	B10_22
B10	25	1	10401.9	114.9	Tox+	1.20584e+07	B10_25
B10	25	2	9228.1	108.3	Tox+	1.20584e+07	B10_25
B10	25	3	13126.6	129.1	Tox+	1.20584e+07	B10_25
B10	25	4	25798.1	622.3	Tox+	1.20584e+07	B10_25
B10	25	5	9228.1	108.3	Tox+	1.20584e+07	B10_25
B10	25	6	8490.4	104	Tox+	1.20584e+07	B10_25
B10	25	7	13333.8	130.2	Tox+	1.20584e+07	B10_25
B10	25	8	12864.3	128	Tox+	1.20584e+07	B10_25
B10	25	9	11182.8	119.3	Tox+	1.20584e+07	B10_25
B10	25	10	9989.9	112.7	Tox+	1.20584e+07	B10_25
B10	25	11	19403.7	390	Tox+	1.20584e+07	B10_25
B10	25	12	12235.5	124.8	Tox+	1.20584e+07	B10_25
B10	25	13	10780.3	117.1	Tox+	1.20584e+07	B10_25
B10	25	14	24114.2	409.8	Tox+	1.20584e+07	B10_25
B10	25	15	13538.6	131.3	Tox+	1.20584e+07	B10_25
B10	25	16	13788.9	132.4	Tox+	1.20584e+07	B10_25
B10	25	17	7450.8	97.4	Tox+	1.20584e+07	B10_25
B10	25	18	13126.6	129.1	Tox+	1.20584e+07	B10_25
B10	25	19	8854.5	106.2	Tox+	1.20584e+07	B10_25
B10	25	20	10170.7	113.8	Tox+	1.20584e+07	B10_25
B10	25	21	14229.7	134.6	Tox+	1.20584e+07	B10_25
B10	25	22	13538.6	131.3	Tox+	1.20584e+07	B10_25
B10	25	23	10170.7	113.8	Tox+	1.20584e+07	B10_25
B10	25	24	10170.7	113.8	Tox+	1.20584e+07	B10_25
B10	24	1	9962.6	112.6	Tox+	8.14724e+06	B10_24
B10	24	2	8467.2	103.8	Tox+	8.14724e+06	B10_24
B10	24	3	11572.7	121.3	Tox+	8.14724e+06	B10_24
B10	24	4	9025	107.1	Tox+	8.14724e+06	B10_24
B10	24	5	11572.7	121.3	Tox+	8.14724e+06	B10_24
B10	24	6	10534.7	115.8	Tox+	8.14724e+06	B10_24
B10	24	7	9388.1	109.3	Tox+	8.14724e+06	B10_24
B10	24	8	7615.6	98.4	Tox+	8.14724e+06	B10_24
B10	24	9	6937.2	94	Tox+	8.14724e+06	B10_24
B10	24	10	7615.6	98.4	Tox+	8.14724e+06	B10_24
B10	24	11	7964.3	100.5	Tox+	8.14724e+06	B10_24
B10	24	12	9388.1	109.3	Tox+	8.14724e+06	B10_24
B10	24	13	7430.4	97.3	Tox+	8.14724e+06	B10_24
B10	24	14	11152.2	119.1	Tox+	8.14724e+06	B10_24
B10	24	15	8638	104.9	Tox+	8.14724e+06	B10_24
B10	24	16	18413.1	438	Tox+	8.14724e+06	B10_24
B10	24	17	6311.3	89.6	Tox+	8.14724e+06	B10_24
B10	24	18	9203	108.2	Tox+	8.14724e+06	B10_24
B10	24	19	7964.3	100.5	Tox+	8.14724e+06	B10_24
B10	24	20	6470.1	90.7	Tox+	8.14724e+06	B10_24
B10	24	21	13092	2495.3	Tox+	8.14724e+06	B10_24
B10	17b	1	7817.1	99.7	Tox+	1.20915e+07	B10_17b
B10	17b	2	7316.3	96.4	Tox+	1.20915e+07	B10_17b
B10	17b	3	7316.3	96.4	Tox+	1.20915e+07	B10_17b
B10	17b	4	10592.6	116.2	Tox+	1.20915e+07	B10_17b
B10	17b	5	10198.7	114	Tox+	1.20915e+07	B10_17b
B10	17b	6	13370.4	130.4	Tox+	1.20915e+07	B10_17b
B10	17b	7	8008.1	100.8	Tox+	1.20915e+07	B10_17b
B10	17b	8	12044.6	123.8	Tox+	1.20915e+07	B10_17b
B10	17b	9	8878.8	106.3	Tox+	1.20915e+07	B10_17b
B10	17b	10	7316.3	96.4	Tox+	1.20915e+07	B10_17b
B10	17b	11	10430.5	115.1	Tox+	1.20915e+07	B10_17b
B10	17b	12	7817.1	99.7	Tox+	1.20915e+07	B10_17b
B10	17b	13	11020.1	118.4	Tox+	1.20915e+07	B10_17b
B10	17b	14	12044.6	123.8	Tox+	1.20915e+07	B10_17b
B10	17b	15	10198.7	114	Tox+	1.20915e+07	B10_17b
B10	17b	16	8685.4	105.2	Tox+	1.20915e+07	B10_17b
B10	17b	17	9439.7	109.6	Tox+	1.20915e+07	B10_17b
B10	17b	18	9828.8	111.8	Tox+	1.20915e+07	B10_17b
B10	17b	19	12496.1	126	Tox+	1.20915e+07	B10_17b
B10	17b	20	9074.6	107.4	Tox+	1.20915e+07	B10_17b
B10	17b	21	12496.1	126	Tox+	1.20915e+07	B10_17b
B10	17b	22	11409.2	120.5	Tox+	1.20915e+07	B10_17b
B10	17b	23	9253.5	108.5	Tox+	1.20915e+07	B10_17b
B10	17b	24	10592.6	116.2	Tox+	1.20915e+07	B10_17b
B10	17b	25	11213.5	119.5	Tox+	1.20915e+07	B10_17b
B10	17b	26	28670.8	397	Tox+	1.20915e+07	B10_17b
B10	17b	27	11636.2	121.6	Tox+	1.20915e+07	B10_17b
B10	17b	28	14268.8	134.8	Tox+	1.20915e+07	B10_17b
B10	17b	29	14749.2	137	Tox+	1.20915e+07	B10_17b
B10	17b	30	11020.1	118.4	Tox+	1.20915e+07	B10_17b
B10	17b	31	10592.6	116.2	Tox+	1.20915e+07	B10_17b
B10	17b	32	20682	226.4	Tox+	1.20915e+07	B10_17b
B10	17b	33	8878.8	106.3	Tox+	1.20915e+07	B10_17b
B10	17b	34	15714.7	141.4	Tox+	1.20915e+07	B10_17b
B10	17b	35	12496.1	126	Tox+	1.20915e+07	B10_17b
B10	17b	36	9828.8	111.8	Tox+	1.20915e+07	B10_17b
B10	17b	37	12044.6	123.8	Tox+	1.20915e+07	B10_17b
B10	17b	38	28239.7	1184.7	Tox+	1.20915e+07	B10_17b
B10	17b	39	11020.1	118.4	Tox+	1.20915e+07	B10_17b
B10	17b	40	14527	135.9	Tox+	1.20915e+07	B10_17b
B10	17b	41	10592.6	116.2	Tox+	1.20915e+07	B10_17b
B10	17b	42	22228.8	284.3	Tox+	1.20915e+07	B10_17b
B10	17b	43	10198.7	114	Tox+	1.20915e+07	B10_17b
B10	17b	44	9828.8	111.8	Tox+	1.20915e+07	B10_17b
B10	17b	45	23199.2	499.2	Tox+	1.20915e+07	B10_17b
B10	17b	46	14527	135.9	Tox+	1.20915e+07	B10_17b
B10	17b	47	23601.5	2997.6	Tox+	1.20915e+07	B10_17b
B10	17b	48	34194.1	2997.6	Tox+	1.20915e+07	B10_17b
B10	17b	49	47356.8	2997.6	Tox+	1.20915e+07	B10_17b
B10	17b	50	11213.5	119.5	Tox+	1.20915e+07	B10_17b
B10	17b	51	8685.4	105.2	Tox+	1.20915e+07	B10_17b
B10	17b	52	18125.1	1937.2	Tox+	1.20915e+07	B10_17b
B10	17b	53	15186.3	139.2	Tox+	1.20915e+07	B10_17b
B10	21	1	9583.9	118.2	Tox+	12058480	B10_21
B10	21	2	15440.6	140.1	Tox+	12058480	B10_21
B10	21	3	10563.6	116	Tox+	12058480	B10_21
B10	21	4	12671.6	126.9	Tox+	12058480	B10_21
B10	21	5	10170.8	113.8	Tox+	12058480	B10_21
B10	21	6	10170.8	113.8	Tox+	12058480	B10_21
B10	21	7	22632.8	292.7	Tox+	12058480	B10_21
B10	21	8	10780.4	117.1	Tox+	12058480	B10_21
B10	21	9	19801.4	158.7	Tox+	12058480	B10_21
B10	21	10	31605.9	571.7	Tox+	12058480	B10_21
B10	21	11	44939.8	1403.5	Tox+	12058480	B10_21
B10	21	12	9801.9	111.6	Tox+	12058480	B10_21
B10	21	13	12462	125.9	Tox+	12058480	B10_21
B10	21	14	12864.4	128	Tox+	12058480	B10_21
B10	21	15	14708.9	136.8	Tox+	12058480	B10_21
B10	21	16	10780.4	117.1	Tox+	12058480	B10_21
B10	21	17	12864.4	128	Tox+	12058480	B10_21
B10	21	18	13333.9	130.2	Tox+	12058480	B10_21
B10	21	19	14229.8	134.6	Tox+	12058480	B10_21
B10	21	20	13789	132.4	Tox+	12058480	B10_21
B10	21	21	14708.9	136.8	Tox+	12058480	B10_21
B10	21	22	12462	125.9	Tox+	12058480	B10_21
B10	21	23	9303.7	114.9	Tox+	12058480	B10_21
B10	21	24	14877.7	140.1	Tox+	12058480	B10_21
B10	21	25	18196.5	152.1	Tox+	12058480	B10_21
B10	21	26	11182.9	119.3	Tox+	12058480	B10_21
B10	21	27	11378.1	120.4	Tox+	12058480	B10_21
B10	21	28	12235.6	124.8	Tox+	12058480	B10_21
B10	21	29	23418.5	434.7	Tox+	12058480	B10_21
B10	21	30	13333.9	130.2	Tox+	12058480	B10_21
B10	21	31	27821.2	791.4	Tox+	12058480	B10_21
B10	21	32	11182.9	119.3	Tox+	12058480	B10_21
B10	21	33	22503.4	221.1	Tox+	12058480	B10_21
B10	21	34	10780.4	117.1	Tox+	12058480	B10_21
B10	21	35	12462	125.9	Tox+	12058480	B10_21
B10	21	36	13993.8	133.5	Tox+	12058480	B10_21
B10	21	37	15440.6	140.1	Tox+	12058480	B10_21
B10	21	38	16571.3	153.2	Tox+	12058480	B10_21
B10	21	39	12235.6	124.8	Tox+	12058480	B10_21
B10	21	40	13536.3	141.2	Tox+	12058480	B10_21
B10	23	1	9448.5	3622.3	Tox+	1.20584e+07	B10_23
B10	23	2	7795.7	99.6	Tox+	1.20584e+07	B10_23
B10	23	3	6956.1	94.1	Tox+	1.20584e+07	B10_23
B10	23	4	7795.7	99.6	Tox+	1.20584e+07	B10_23
B10	23	5	7450.8	97.4	Tox+	1.20584e+07	B10_23
B10	23	6	16112.4	602.6	Tox+	1.20584e+07	B10_23
B10	23	7	8854.5	106.2	Tox+	1.20584e+07	B10_23
B10	23	8	8126.3	101.8	Tox+	1.20584e+07	B10_23
B10	23	9	5283	84.3	Tox+	1.20584e+07	B10_23
B10	23	10	7296.3	96.3	Tox+	1.20584e+07	B10_23
B10	23	11	7636.4	98.5	Tox+	1.20584e+07	B10_23
B10	23	12	7134.6	95.2	Tox+	1.20584e+07	B10_23
B10	23	13	8126.3	101.8	Tox+	1.20584e+07	B10_23
B10	23	14	7986.2	100.7	Tox+	1.20584e+07	B10_23
B10	23	15	8321.5	102.9	Tox+	1.20584e+07	B10_23
B10	23	16	7795.7	99.6	Tox+	1.20584e+07	B10_23
B10	23	17	14435.7	486.2	Tox+	1.20584e+07	B10_23
B10	23	18	8321.5	102.9	Tox+	1.20584e+07	B10_23
B10	23	19	9228.1	108.3	Tox+	1.20584e+07	B10_23
B10	23	20	9049.7	107.3	Tox+	1.20584e+07	B10_23
B10	23	21	9606.6	110.5	Tox+	1.20584e+07	B10_23
B10	23	22	9801.8	111.6	Tox+	1.20584e+07	B10_23
B10	23	23	13333.8	130.2	Tox+	1.20584e+07	B10_23
B10	23	24	8490.4	104	Tox+	1.20584e+07	B10_23
B10	23	25	10563.6	116	Tox+	1.20584e+07	B10_23
B10	23	26	7296.3	96.3	Tox+	1.20584e+07	B10_23
B10	23	27	7795.7	99.6	Tox+	1.20584e+07	B10_23
B10	23	28	7450.8	97.4	Tox+	1.20584e+07	B10_23
B10	23	29	10401.9	114.9	Tox+	1.20584e+07	B10_23
B10	23	30	10401.9	114.9	Tox+	1.20584e+07	B10_23
B10	23	31	13126.6	129.1	Tox+	1.20584e+07	B10_23
B10	23	32	9228.1	108.3	Tox+	1.20584e+07	B10_23
B10	23	33	19791.7	378	Tox+	1.20584e+07	B10_23
B10	23	34	30193.6	519.1	Tox+	1.20584e+07	B10_23
B10	23	35	5447.1	83.2	Tox+	1.20584e+07	B10_23
B10	23	36	9228.1	108.3	Tox+	1.20584e+07	B10_23
B10	23	37	8321.5	102.9	Tox+	1.20584e+07	B10_23
B10	23	38	20993	240.2	Tox+	1.20584e+07	B10_23
B10	23	39	32989	343	Tox+	1.20584e+07	B10_23
B10	23	40	10563.6	116	Tox+	1.20584e+07	B10_23
B10	23	41	8661.6	105.1	Tox+	1.20584e+07	B10_23
B10	23	42	11182.8	119.3	Tox+	1.20584e+07	B10_23
B10	23	43	21746.3	389.3	Tox+	1.20584e+07	B10_23
B10	23	44	8490.4	104	Tox+	1.20584e+07	B10_23
B10	23	45	22029	265.1	Tox+	1.20584e+07	B10_23
B10	23	46	9228.1	108.3	Tox+	1.20584e+07	B10_23
B10	23	47	10780.3	117.1	Tox+	1.20584e+07	B10_23
B10	23	48	9801.8	111.6	Tox+	1.20584e+07	B10_23
B10	23	49	19301.9	214.7	Tox+	1.20584e+07	B10_23
B10	23	50	9801.8	111.6	Tox+	1.20584e+07	B10_23
B10	23	51	10401.9	114.9	Tox+	1.20584e+07	B10_23
B10	23	52	9606.6	110.5	Tox+	1.20584e+07	B10_23
B10	23	53	10780.3	117.1	Tox+	1.20584e+07	B10_23
B10	23	54	10780.3	117.1	Tox+	1.20584e+07	B10_23
B10	23	55	20008.5	230	Tox+	1.20584e+07	B10_23
B10	23	56	28670.1	389.6	Tox+	1.20584e+07	B10_23
B10	23	57	38274.4	399	Tox+	1.20584e+07	B10_23
B10	23	58	10780.3	117.1	Tox+	1.20584e+07	B10_23
B10	23	59	22791.9	284.9	Tox+	1.20584e+07	B10_23
B10	23	60	32706.3	315.3	Tox+	1.20584e+07	B10_23
B10	23	61	43696.3	376.2	Tox+	1.20584e+07	B10_23
B10	23	62	10170.7	113.8	Tox+	1.20584e+07	B10_23
B10	23	63	18710.2	210.9	Tox+	1.20584e+07	B10_23
B10	23	64	30176.8	312	Tox+	1.20584e+07	B10_23
B10	23	65	36929.4	606.3	Tox+	1.20584e+07	B10_23
B10	23	66	8490.4	104	Tox+	1.20584e+07	B10_23
B10	23	67	15941.2	315.7	Tox+	1.20584e+07	B10_23
B10	23	68	25355	500	Tox+	1.20584e+07	B10_23
B10	23	69	8321.5	102.9	Tox+	1.20584e+07	B10_23
B10	23	70	15277.6	316.7	Tox+	1.20584e+07	B10_23
B10	23	71	7795.7	99.6	Tox+	1.20584e+07	B10_23
B10	23	72	9228.1	108.3	Tox+	1.20584e+07	B10_23
B10	23	73	9228.1	108.3	Tox+	1.20584e+07	B10_23
B10	23	74	8321.5	102.9	Tox+	1.20584e+07	B10_23
B10	23	75	10401.9	114.9	Tox+	1.20584e+07	B10_23
B10	23	76	7795.7	99.6	Tox+	1.20584e+07	B10_23
B10	23	77	9228.1	108.3	Tox+	1.20584e+07	B10_23
B10	23	78	11604.4	121.5	Tox+	1.20584e+07	B10_23
B10	23	79	9801.8	111.6	Tox+	1.20584e+07	B10_23
B10	23	80	11182.8	119.3	Tox+	1.20584e+07	B10_23
B10	23	81	9413.8	109.4	Tox+	1.20584e+07	B10_23
B10	23	82	21543.9	230.7	Tox+	1.20584e+07	B10_23
B10	23	83	13126.6	129.1	Tox+	1.20584e+07	B10_23
B10	23	84	9228.1	108.3	Tox+	1.20584e+07	B10_23
B10	23	85	7795.7	99.6	Tox+	1.20584e+07	B10_23
B10	23	86	8490.4	104	Tox+	1.20584e+07	B10_23
B10	23	87	17904.2	299	Tox+	1.20584e+07	B10_23
B10	23	88	13333.8	130.2	Tox+	1.20584e+07	B10_23
B10	23	89	11182.8	119.3	Tox+	1.20584e+07	B10_23
B10	23	90	17508.9	209.6	Tox+	1.20584e+07	B10_23
B10	23	91	13538.6	131.3	Tox+	1.20584e+07	B10_23
B10	23	92	10563.6	116	Tox+	1.20584e+07	B10_23
B10	23	93	11182.8	119.3	Tox+	1.20584e+07	B10_23
B10	23	94	7296.3	96.3	Tox+	1.20584e+07	B10_23
B10	23	95	8854.5	106.2	Tox+	1.20584e+07	B10_23
B10	23	96	11604.4	121.5	Tox+	1.20584e+07	B10_23
B10	23	97	13538.6	131.3	Tox+	1.20584e+07	B10_23
B10	23	98	10780.3	117.1	Tox+	1.20584e+07	B10_23
B10	23	99	6956.1	94.1	Tox+	1.20584e+07	B10_23
B10	23	100	8490.4	104	Tox+	1.20584e+07	B10_23
B10	23	101	7795.7	99.6	Tox+	1.20584e+07	B10_23
B10	23	102	10170.7	113.8	Tox+	1.20584e+07	B10_23
B10	23	103	12671.5	126.9	Tox+	1.20584e+07	B10_23
B10	23	104	8490.4	104	Tox+	1.20584e+07	B10_23
B10	23	105	12461.9	125.9	Tox+	1.20584e+07	B10_23
B10	23	106	7986.2	100.7	Tox+	1.20584e+07	B10_23
B10	23	107	11604.4	121.5	Tox+	1.20584e+07	B10_23
B10	23	108	6956.1	94.1	Tox+	1.20584e+07	B10_23
B10	23	109	7296.3	96.3	Tox+	1.20584e+07	B10_23
B10	23	110	6328.6	89.7	Tox+	1.20584e+07	B10_23
B10	23	111	10989.9	118.2	Tox+	1.20584e+07	B10_23
B10	23	112	8854.5	106.2	Tox+	1.20584e+07	B10_23
B10	23	113	12461.9	125.9	Tox+	1.20584e+07	B10_23
B10	23	114	8490.4	104	Tox+	1.20584e+07	B10_23
B10	23	115	10401.9	114.9	Tox+	1.20584e+07	B10_23
B10	23	116	12461.9	125.9	Tox+	1.20584e+07	B10_23
B10	23	117	23615.9	244.8	Tox+	1.20584e+07	B10_23
B10	23	118	10989.9	118.2	Tox+	1.20584e+07	B10_23
B10	23	119	7795.7	99.6	Tox+	1.20584e+07	B10_23
B10	23	120	16896.9	146.6	Tox+	1.20584e+07	B10_23

## Sheet: Figure 1E
Condition	Experience	Prop_presence	SD_Prop_presence
siCTRL	CAV 1	0.4	0.0489898
siCTRL	CAV 2	0.4	0.0489898
siCTRL	CAV 5	0.36	0.0339411
siCTRL	CAV 6	0.265	0.031207
siCTRL	CAV 8	0.205	0.028546
siCTRL	CAV 10	0.245	0.0304118
siCTRL	CAV 11	0.365	0.0340423
siCTRL	CAV 17	0.175	0.0268677
siCAV1	CAV 1	0.44	0.0496387
siCAV1	CAV 2	0.56	0.0496387
siCAV1	CAV 5	0.485	0.0353394
siCAV1	CAV 6	0.425	0.0349553
siCAV1	CAV 8	0.31	0.0327032
siCAV1	CAV 10	0.35	0.0337268
siCAV1	CAV 11	0.29	0.0320858
siCAV1	CAV 17	0.275	0.0315733
siCavin1	CAV 1	0.46	0.0498397
siCavin1	CAV 2	0.51	0.04999
siCavin1	CAV 5	0.37	0.0341394
siCavin1	CAV 6	0.315	0.0328462
siCavin1	CAV 8	0.31	0.0327032
siCavin1	CAV 10	0.41	0.0347779
siCavin1	CAV 11	0.435	0.0350553
siCavin1	CAV 17	0.22	0.0292916

## Sheet: Figure 1E - raw data
Cell_nb	Experience	Condition	TEM
1	CAV 1	siCAV1	0
2	CAV 1	siCAV1	0
3	CAV 1	siCAV1	0
4	CAV 1	siCAV1	0
5	CAV 1	siCAV1	0
6	CAV 1	siCAV1	0
7	CAV 1	siCAV1	0
8	CAV 1	siCAV1	0
9	CAV 1	siCAV1	0
10	CAV 1	siCAV1	0
11	CAV 1	siCAV1	0
12	CAV 1	siCAV1	0
13	CAV 1	siCAV1	0
14	CAV 1	siCAV1	0
15	CAV 1	siCAV1	0
16	CAV 1	siCAV1	0
17	CAV 1	siCAV1	0
18	CAV 1	siCAV1	0
19	CAV 1	siCAV1	0
20	CAV 1	siCAV1	0
21	CAV 1	siCAV1	0
22	CAV 1	siCAV1	0
23	CAV 1	siCAV1	0
24	CAV 1	siCAV1	0
25	CAV 1	siCAV1	0
26	CAV 1	siCAV1	0
27	CAV 1	siCAV1	0
28	CAV 1	siCAV1	0
29	CAV 1	siCAV1	0
30	CAV 1	siCAV1	0
31	CAV 1	siCAV1	0
32	CAV 1	siCAV1	0
33	CAV 1	siCAV1	0
34	CAV 1	siCAV1	0
35	CAV 1	siCAV1	0
36	CAV 1	siCAV1	0
37	CAV 1	siCAV1	0
38	CAV 1	siCAV1	0
39	CAV 1	siCAV1	0
40	CAV 1	siCAV1	0
41	CAV 1	siCAV1	0
42	CAV 1	siCAV1	0
43	CAV 1	siCAV1	0
44	CAV 1	siCAV1	0
45	CAV 1	siCAV1	0
46	CAV 1	siCAV1	0
47	CAV 1	siCAV1	0
48	CAV 1	siCAV1	0
49	CAV 1	siCAV1	0
50	CAV 1	siCAV1	0
51	CAV 1	siCAV1	0
52	CAV 1	siCAV1	0
53	CAV 1	siCAV1	0
54	CAV 1	siCAV1	0
55	CAV 1	siCAV1	0
56	CAV 1	siCAV1	0
57	CAV 1	siCAV1	1
58	CAV 1	siCAV1	1
59	CAV 1	siCAV1	1
60	CAV 1	siCAV1	1
61	CAV 1	siCAV1	1
62	CAV 1	siCAV1	1
63	CAV 1	siCAV1	1
64	CAV 1	siCAV1	1
65	CAV 1	siCAV1	1
66	CAV 1	siCAV1	1
67	CAV 1	siCAV1	1
68	CAV 1	siCAV1	1
69	CAV 1	siCAV1	1
70	CAV 1	siCAV1	1
71	CAV 1	siCAV1	1
72	CAV 1	siCAV1	1
73	CAV 1	siCAV1	1
74	CAV 1	siCAV1	1
75	CAV 1	siCAV1	1
76	CAV 1	siCAV1	1
77	CAV 1	siCAV1	1
78	CAV 1	siCAV1	1
79	CAV 1	siCAV1	1
80	CAV 1	siCAV1	1
81	CAV 1	siCAV1	1
82	CAV 1	siCAV1	1
83	CAV 1	siCAV1	1
84	CAV 1	siCAV1	1
85	CAV 1	siCAV1	1
86	CAV 1	siCAV1	1
87	CAV 1	siCAV1	1
88	CAV 1	siCAV1	1
89	CAV 1	siCAV1	1
90	CAV 1	siCAV1	1
91	CAV 1	siCAV1	1
92	CAV 1	siCAV1	1
93	CAV 1	siCAV1	1
94	CAV 1	siCAV1	1
95	CAV 1	siCAV1	1
96	CAV 1	siCAV1	1
97	CAV 1	siCAV1	1
98	CAV 1	siCAV1	1
99	CAV 1	siCAV1	1
100	CAV 1	siCAV1	1
101	CAV 2	siCAV1	0
102	CAV 2	siCAV1	0
103	CAV 2	siCAV1	0
104	CAV 2	siCAV1	0
105	CAV 2	siCAV1	0
106	CAV 2	siCAV1	0
107	CAV 2	siCAV1	0
108	CAV 2	siCAV1	0
109	CAV 2	siCAV1	0
110	CAV 2	siCAV1	0
111	CAV 2	siCAV1	0
112	CAV 2	siCAV1	0
113	CAV 2	siCAV1	0
114	CAV 2	siCAV1	0
115	CAV 2	siCAV1	0
116	CAV 2	siCAV1	0
117	CAV 2	siCAV1	0
118	CAV 2	siCAV1	0
119	CAV 2	siCAV1	0
120	CAV 2	siCAV1	0
121	CAV 2	siCAV1	0
122	CAV 2	siCAV1	0
123	CAV 2	siCAV1	0
124	CAV 2	siCAV1	0
125	CAV 2	siCAV1	0
126	CAV 2	siCAV1	0
127	CAV 2	siCAV1	0
128	CAV 2	siCAV1	0
129	CAV 2	siCAV1	0
130	CAV 2	siCAV1	0
131	CAV 2	siCAV1	0
132	CAV 2	siCAV1	0
133	CAV 2	siCAV1	0
134	CAV 2	siCAV1	0
135	CAV 2	siCAV1	0
136	CAV 2	siCAV1	0
137	CAV 2	siCAV1	0
138	CAV 2	siCAV1	0
139	CAV 2	siCAV1	0
140	CAV 2	siCAV1	0
141	CAV 2	siCAV1	0
142	CAV 2	siCAV1	0
143	CAV 2	siCAV1	0
144	CAV 2	siCAV1	0
145	CAV 2	siCAV1	1
146	CAV 2	siCAV1	1
147	CAV 2	siCAV1	1
148	CAV 2	siCAV1	1
149	CAV 2	siCAV1	1
150	CAV 2	siCAV1	1
151	CAV 2	siCAV1	1
152	CAV 2	siCAV1	1
153	CAV 2	siCAV1	1
154	CAV 2	siCAV1	1
155	CAV 2	siCAV1	1
156	CAV 2	siCAV1	1
157	CAV 2	siCAV1	1
158	CAV 2	siCAV1	1
159	CAV 2	siCAV1	1
160	CAV 2	siCAV1	1
161	CAV 2	siCAV1	1
162	CAV 2	siCAV1	1
163	CAV 2	siCAV1	1
164	CAV 2	siCAV1	1
165	CAV 2	siCAV1	1
166	CAV 2	siCAV1	1
167	CAV 2	siCAV1	1
168	CAV 2	siCAV1	1
169	CAV 2	siCAV1	1
170	CAV 2	siCAV1	1
171	CAV 2	siCAV1	1
172	CAV 2	siCAV1	1
173	CAV 2	siCAV1	1
174	CAV 2	siCAV1	1
175	CAV 2	siCAV1	1
176	CAV 2	siCAV1	1
177	CAV 2	siCAV1	1
178	CAV 2	siCAV1	1
179	CAV 2	siCAV1	1
180	CAV 2	siCAV1	1
181	CAV 2	siCAV1	1
182	CAV 2	siCAV1	1
183	CAV 2	siCAV1	1
184	CAV 2	siCAV1	1
185	CAV 2	siCAV1	1
186	CAV 2	siCAV1	1
187	CAV 2	siCAV1	1
188	CAV 2	siCAV1	1
189	CAV 2	siCAV1	1
190	CAV 2	siCAV1	1
191	CAV 2	siCAV1	1
192	CAV 2	siCAV1	1
193	CAV 2	siCAV1	1
194	CAV 2	siCAV1	1
195	CAV 2	siCAV1	1
196	CAV 2	siCAV1	1
197	CAV 2	siCAV1	1
198	CAV 2	siCAV1	1
199	CAV 2	siCAV1	1
200	CAV 2	siCAV1	1
201	CAV 5	siCAV1	0
202	CAV 5	siCAV1	0
203	CAV 5	siCAV1	0
204	CAV 5	siCAV1	0
205	CAV 5	siCAV1	0
206	CAV 5	siCAV1	0
207	CAV 5	siCAV1	0
208	CAV 5	siCAV1	0
209	CAV 5	siCAV1	0
210	CAV 5	siCAV1	0
211	CAV 5	siCAV1	0
212	CAV 5	siCAV1	0
213	CAV 5	siCAV1	0
214	CAV 5	siCAV1	0
215	CAV 5	siCAV1	0
216	CAV 5	siCAV1	0
217	CAV 5	siCAV1	0
218	CAV 5	siCAV1	0
219	CAV 5	siCAV1	0
220	CAV 5	siCAV1	0
221	CAV 5	siCAV1	0
222	CAV 5	siCAV1	0
223	CAV 5	siCAV1	0
224	CAV 5	siCAV1	0
225	CAV 5	siCAV1	0
226	CAV 5	siCAV1	0
227	CAV 5	siCAV1	0
228	CAV 5	siCAV1	0
229	CAV 5	siCAV1	0
230	CAV 5	siCAV1	0
231	CAV 5	siCAV1	0
232	CAV 5	siCAV1	0
233	CAV 5	siCAV1	0
234	CAV 5	siCAV1	0
235	CAV 5	siCAV1	0
236	CAV 5	siCAV1	0
237	CAV 5	siCAV1	0
238	CAV 5	siCAV1	0
239	CAV 5	siCAV1	0
240	CAV 5	siCAV1	0
241	CAV 5	siCAV1	0
242	CAV 5	siCAV1	0
243	CAV 5	siCAV1	0
244	CAV 5	siCAV1	0
245	CAV 5	siCAV1	0
246	CAV 5	siCAV1	0
247	CAV 5	siCAV1	0
248	CAV 5	siCAV1	0
249	CAV 5	siCAV1	0
250	CAV 5	siCAV1	0
251	CAV 5	siCAV1	0
252	CAV 5	siCAV1	0
253	CAV 5	siCAV1	0
254	CAV 5	siCAV1	0
255	CAV 5	siCAV1	0
256	CAV 5	siCAV1	0
257	CAV 5	siCAV1	0
258	CAV 5	siCAV1	0
259	CAV 5	siCAV1	0
260	CAV 5	siCAV1	0
261	CAV 5	siCAV1	0
262	CAV 5	siCAV1	0
263	CAV 5	siCAV1	0
264	CAV 5	siCAV1	0
265	CAV 5	siCAV1	0
266	CAV 5	siCAV1	0
267	CAV 5	siCAV1	0
268	CAV 5	siCAV1	0
269	CAV 5	siCAV1	0
270	CAV 5	siCAV1	0
271	CAV 5	siCAV1	0
272	CAV 5	siCAV1	0
273	CAV 5	siCAV1	0
274	CAV 5	siCAV1	0
275	CAV 5	siCAV1	0
276	CAV 5	siCAV1	0
277	CAV 5	siCAV1	0
278	CAV 5	siCAV1	0
279	CAV 5	siCAV1	0
280	CAV 5	siCAV1	0
281	CAV 5	siCAV1	0
282	CAV 5	siCAV1	0
283	CAV 5	siCAV1	0
284	CAV 5	siCAV1	0
285	CAV 5	siCAV1	0
286	CAV 5	siCAV1	0
287	CAV 5	siCAV1	0
288	CAV 5	siCAV1	0
289	CAV 5	siCAV1	0
290	CAV 5	siCAV1	0
291	CAV 5	siCAV1	0
292	CAV 5	siCAV1	0
293	CAV 5	siCAV1	0
294	CAV 5	siCAV1	0
295	CAV 5	siCAV1	0
296	CAV 5	siCAV1	0
297	CAV 5	siCAV1	0
298	CAV 5	siCAV1	0
299	CAV 5	siCAV1	0
300	CAV 5	siCAV1	0
301	CAV 5	siCAV1	0
302	CAV 5	siCAV1	0
303	CAV 5	siCAV1	0
304	CAV 5	siCAV1	1
305	CAV 5	siCAV1	1
306	CAV 5	siCAV1	1
307	CAV 5	siCAV1	1
308	CAV 5	siCAV1	1
309	CAV 5	siCAV1	1
310	CAV 5	siCAV1	1
311	CAV 5	siCAV1	1
312	CAV 5	siCAV1	1
313	CAV 5	siCAV1	1
314	CAV 5	siCAV1	1
315	CAV 5	siCAV1	1
316	CAV 5	siCAV1	1
317	CAV 5	siCAV1	1
318	CAV 5	siCAV1	1
319	CAV 5	siCAV1	1
320	CAV 5	siCAV1	1
321	CAV 5	siCAV1	1
322	CAV 5	siCAV1	1
323	CAV 5	siCAV1	1
324	CAV 5	siCAV1	1
325	CAV 5	siCAV1	1
326	CAV 5	siCAV1	1
327	CAV 5	siCAV1	1
328	CAV 5	siCAV1	1
329	CAV 5	siCAV1	1
330	CAV 5	siCAV1	1
331	CAV 5	siCAV1	1
332	CAV 5	siCAV1	1
333	CAV 5	siCAV1	1
334	CAV 5	siCAV1	1
335	CAV 5	siCAV1	1
336	CAV 5	siCAV1	1
337	CAV 5	siCAV1	1
338	CAV 5	siCAV1	1
339	CAV 5	siCAV1	1
340	CAV 5	siCAV1	1
341	CAV 5	siCAV1	1
342	CAV 5	siCAV1	1
343	CAV 5	siCAV1	1
344	CAV 5	siCAV1	1
345	CAV 5	siCAV1	1
346	CAV 5	siCAV1	1
347	CAV 5	siCAV1	1
348	CAV 5	siCAV1	1
349	CAV 5	siCAV1	1
350	CAV 5	siCAV1	1
351	CAV 5	siCAV1	1
352	CAV 5	siCAV1	1
353	CAV 5	siCAV1	1
354	CAV 5	siCAV1	1
355	CAV 5	siCAV1	1
356	CAV 5	siCAV1	1
357	CAV 5	siCAV1	1
358	CAV 5	siCAV1	1
359	CAV 5	siCAV1	1
360	CAV 5	siCAV1	1
361	CAV 5	siCAV1	1
362	CAV 5	siCAV1	1
363	CAV 5	siCAV1	1
364	CAV 5	siCAV1	1
365	CAV 5	siCAV1	1
366	CAV 5	siCAV1	1
367	CAV 5	siCAV1	1
368	CAV 5	siCAV1	1
369	CAV 5	siCAV1	1
370	CAV 5	siCAV1	1
371	CAV 5	siCAV1	1
372	CAV 5	siCAV1	1
373	CAV 5	siCAV1	1
374	CAV 5	siCAV1	1
375	CAV 5	siCAV1	1
376	CAV 5	siCAV1	1
377	CAV 5	siCAV1	1
378	CAV 5	siCAV1	1
379	CAV 5	siCAV1	1
380	CAV 5	siCAV1	1
381	CAV 5	siCAV1	1
382	CAV 5	siCAV1	1
383	CAV 5	siCAV1	1
384	CAV 5	siCAV1	1
385	CAV 5	siCAV1	1
386	CAV 5	siCAV1	1
387	CAV 5	siCAV1	1
388	CAV 5	siCAV1	1
389	CAV 5	siCAV1	1
390	CAV 5	siCAV1	1
391	CAV 5	siCAV1	1
392	CAV 5	siCAV1	1
393	CAV 5	siCAV1	1
394	CAV 5	siCAV1	1
395	CAV 5	siCAV1	1
396	CAV 5	siCAV1	1
397	CAV 5	siCAV1	1
398	CAV 5	siCAV1	1
399	CAV 5	siCAV1	1
400	CAV 5	siCAV1	1
401	CAV 6	siCAV1	0
402	CAV 6	siCAV1	0
403	CAV 6	siCAV1	0
404	CAV 6	siCAV1	0
405	CAV 6	siCAV1	0
406	CAV 6	siCAV1	0
407	CAV 6	siCAV1	0
408	CAV 6	siCAV1	0
409	CAV 6	siCAV1	0
410	CAV 6	siCAV1	0
411	CAV 6	siCAV1	0
412	CAV 6	siCAV1	0
413	CAV 6	siCAV1	0
414	CAV 6	siCAV1	0
415	CAV 6	siCAV1	0
416	CAV 6	siCAV1	0
417	CAV 6	siCAV1	0
418	CAV 6	siCAV1	0
419	CAV 6	siCAV1	0
420	CAV 6	siCAV1	0
421	CAV 6	siCAV1	0
422	CAV 6	siCAV1	0
423	CAV 6	siCAV1	0
424	CAV 6	siCAV1	0
425	CAV 6	siCAV1	0
426	CAV 6	siCAV1	0
427	CAV 6	siCAV1	0
428	CAV 6	siCAV1	0
429	CAV 6	siCAV1	0
430	CAV 6	siCAV1	0
431	CAV 6	siCAV1	0
432	CAV 6	siCAV1	0
433	CAV 6	siCAV1	0
434	CAV 6	siCAV1	0
435	CAV 6	siCAV1	0
436	CAV 6	siCAV1	0
437	CAV 6	siCAV1	0
438	CAV 6	siCAV1	0
439	CAV 6	siCAV1	0
440	CAV 6	siCAV1	0
441	CAV 6	siCAV1	0
442	CAV 6	siCAV1	0
443	CAV 6	siCAV1	0
444	CAV 6	siCAV1	0
445	CAV 6	siCAV1	0
446	CAV 6	siCAV1	0
447	CAV 6	siCAV1	0
448	CAV 6	siCAV1	0
449	CAV 6	siCAV1	0
450	CAV 6	siCAV1	0
451	CAV 6	siCAV1	0
452	CAV 6	siCAV1	0
453	CAV 6	siCAV1	0
454	CAV 6	siCAV1	0
455	CAV 6	siCAV1	0
456	CAV 6	siCAV1	0
457	CAV 6	siCAV1	0
458	CAV 6	siCAV1	0
459	CAV 6	siCAV1	0
460	CAV 6	siCAV1	0
461	CAV 6	siCAV1	0
462	CAV 6	siCAV1	0
463	CAV 6	siCAV1	0
464	CAV 6	siCAV1	0
465	CAV 6	siCAV1	0
466	CAV 6	siCAV1	0
467	CAV 6	siCAV1	0
468	CAV 6	siCAV1	0
469	CAV 6	siCAV1	0
470	CAV 6	siCAV1	0
471	CAV 6	siCAV1	0
472	CAV 6	siCAV1	0
473	CAV 6	siCAV1	0
474	CAV 6	siCAV1	0
475	CAV 6	siCAV1	0
476	CAV 6	siCAV1	0
477	CAV 6	siCAV1	0
478	CAV 6	siCAV1	0
479	CAV 6	siCAV1	0
480	CAV 6	siCAV1	0
481	CAV 6	siCAV1	0
482	CAV 6	siCAV1	0
483	CAV 6	siCAV1	0
484	CAV 6	siCAV1	0
485	CAV 6	siCAV1	0
486	CAV 6	siCAV1	0
487	CAV 6	siCAV1	0
488	CAV 6	siCAV1	0
489	CAV 6	siCAV1	0
490	CAV 6	siCAV1	0
491	CAV 6	siCAV1	0
492	CAV 6	siCAV1	0
493	CAV 6	siCAV1	0
494	CAV 6	siCAV1	0
495	CAV 6	siCAV1	0
496	CAV 6	siCAV1	0
497	CAV 6	siCAV1	0
498	CAV 6	siCAV1	0
499	CAV 6	siCAV1	0
500	CAV 6	siCAV1	0
501	CAV 6	siCAV1	0
502	CAV 6	siCAV1	0
503	CAV 6	siCAV1	0
504	CAV 6	siCAV1	0
505	CAV 6	siCAV1	0
506	CAV 6	siCAV1	0
507	CAV 6	siCAV1	0
508	CAV 6	siCAV1	0
509	CAV 6	siCAV1	0
510	CAV 6	siCAV1	0
511	CAV 6	siCAV1	0
512	CAV 6	siCAV1	0
513	CAV 6	siCAV1	0
514	CAV 6	siCAV1	0
515	CAV 6	siCAV1	0
516	CAV 6	siCAV1	1
517	CAV 6	siCAV1	1
518	CAV 6	siCAV1	1
519	CAV 6	siCAV1	1
520	CAV 6	siCAV1	1
521	CAV 6	siCAV1	1
522	CAV 6	siCAV1	1
523	CAV 6	siCAV1	1
524	CAV 6	siCAV1	1
525	CAV 6	siCAV1	1
526	CAV 6	siCAV1	1
527	CAV 6	siCAV1	1
528	CAV 6	siCAV1	1
529	CAV 6	siCAV1	1
530	CAV 6	siCAV1	1
531	CAV 6	siCAV1	1
532	CAV 6	siCAV1	1
533	CAV 6	siCAV1	1
534	CAV 6	siCAV1	1
535	CAV 6	siCAV1	1
536	CAV 6	siCAV1	1
537	CAV 6	siCAV1	1
538	CAV 6	siCAV1	1
539	CAV 6	siCAV1	1
540	CAV 6	siCAV1	1
541	CAV 6	siCAV1	1
542	CAV 6	siCAV1	1
543	CAV 6	siCAV1	1
544	CAV 6	siCAV1	1
545	CAV 6	siCAV1	1
546	CAV 6	siCAV1	1
547	CAV 6	siCAV1	1
548	CAV 6	siCAV1	1
549	CAV 6	siCAV1	1
550	CAV 6	siCAV1	1
551	CAV 6	siCAV1	1
552	CAV 6	siCAV1	1
553	CAV 6	siCAV1	1
554	CAV 6	siCAV1	1
555	CAV 6	siCAV1	1
556	CAV 6	siCAV1	1
557	CAV 6	siCAV1	1
558	CAV 6	siCAV1	1
559	CAV 6	siCAV1	1
560	CAV 6	siCAV1	1
561	CAV 6	siCAV1	1
562	CAV 6	siCAV1	1
563	CAV 6	siCAV1	1
564	CAV 6	siCAV1	1
565	CAV 6	siCAV1	1
566	CAV 6	siCAV1	1
567	CAV 6	siCAV1	1
568	CAV 6	siCAV1	1
569	CAV 6	siCAV1	1
570	CAV 6	siCAV1	1
571	CAV 6	siCAV1	1
572	CAV 6	siCAV1	1
573	CAV 6	siCAV1	1
574	CAV 6	siCAV1	1
575	CAV 6	siCAV1	1
576	CAV 6	siCAV1	1
577	CAV 6	siCAV1	1
578	CAV 6	siCAV1	1
579	CAV 6	siCAV1	1
580	CAV 6	siCAV1	1
581	CAV 6	siCAV1	1
582	CAV 6	siCAV1	1
583	CAV 6	siCAV1	1
584	CAV 6	siCAV1	1
585	CAV 6	siCAV1	1
586	CAV 6	siCAV1	1
587	CAV 6	siCAV1	1
588	CAV 6	siCAV1	1
589	CAV 6	siCAV1	1
590	CAV 6	siCAV1	1
591	CAV 6	siCAV1	1
592	CAV 6	siCAV1	1
593	CAV 6	siCAV1	1
594	CAV 6	siCAV1	1
595	CAV 6	siCAV1	1
596	CAV 6	siCAV1	1
597	CAV 6	siCAV1	1
598	CAV 6	siCAV1	1
599	CAV 6	siCAV1	1
600	CAV 6	siCAV1	1
601	CAV 8	siCAV1	0
602	CAV 8	siCAV1	0
603	CAV 8	siCAV1	0
604	CAV 8	siCAV1	0
605	CAV 8	siCAV1	0
606	CAV 8	siCAV1	0
607	CAV 8	siCAV1	0
608	CAV 8	siCAV1	0
609	CAV 8	siCAV1	0
610	CAV 8	siCAV1	0
611	CAV 8	siCAV1	0
612	CAV 8	siCAV1	0
613	CAV 8	siCAV1	0
614	CAV 8	siCAV1	0
615	CAV 8	siCAV1	0
616	CAV 8	siCAV1	0
617	CAV 8	siCAV1	0
618	CAV 8	siCAV1	0
619	CAV 8	siCAV1	0
620	CAV 8	siCAV1	0
621	CAV 8	siCAV1	0
622	CAV 8	siCAV1	0
623	CAV 8	siCAV1	0
624	CAV 8	siCAV1	0
625	CAV 8	siCAV1	0
626	CAV 8	siCAV1	0
627	CAV 8	siCAV1	0
628	CAV 8	siCAV1	0
629	CAV 8	siCAV1	0
630	CAV 8	siCAV1	0
631	CAV 8	siCAV1	0
632	CAV 8	siCAV1	0
633	CAV 8	siCAV1	0
634	CAV 8	siCAV1	0
635	CAV 8	siCAV1	0
636	CAV 8	siCAV1	0
637	CAV 8	siCAV1	0
638	CAV 8	siCAV1	0
639	CAV 8	siCAV1	0
640	CAV 8	siCAV1	0
641	CAV 8	siCAV1	0
642	CAV 8	siCAV1	0
643	CAV 8	siCAV1	0
644	CAV 8	siCAV1	0
645	CAV 8	siCAV1	0
646	CAV 8	siCAV1	0
647	CAV 8	siCAV1	0
648	CAV 8	siCAV1	0
649	CAV 8	siCAV1	0
650	CAV 8	siCAV1	0
651	CAV 8	siCAV1	0
652	CAV 8	siCAV1	0
653	CAV 8	siCAV1	0
654	CAV 8	siCAV1	0
655	CAV 8	siCAV1	0
656	CAV 8	siCAV1	0
657	CAV 8	siCAV1	0
658	CAV 8	siCAV1	0
659	CAV 8	siCAV1	0
660	CAV 8	siCAV1	0
661	CAV 8	siCAV1	0
662	CAV 8	siCAV1	0
663	CAV 8	siCAV1	0
664	CAV 8	siCAV1	0
665	CAV 8	siCAV1	0
666	CAV 8	siCAV1	0
667	CAV 8	siCAV1	0
668	CAV 8	siCAV1	0
669	CAV 8	siCAV1	0
670	CAV 8	siCAV1	0
671	CAV 8	siCAV1	0
672	CAV 8	siCAV1	0
673	CAV 8	siCAV1	0
674	CAV 8	siCAV1	0
675	CAV 8	siCAV1	0
676	CAV 8	siCAV1	0
677	CAV 8	siCAV1	0
678	CAV 8	siCAV1	0
679	CAV 8	siCAV1	0
680	CAV 8	siCAV1	0
681	CAV 8	siCAV1	0
682	CAV 8	siCAV1	0
683	CAV 8	siCAV1	0
684	CAV 8	siCAV1	0
685	CAV 8	siCAV1	0
686	CAV 8	siCAV1	0
687	CAV 8	siCAV1	0
688	CAV 8	siCAV1	0
689	CAV 8	siCAV1	0
690	CAV 8	siCAV1	0
691	CAV 8	siCAV1	0
692	CAV 8	siCAV1	0
693	CAV 8	siCAV1	0
694	CAV 8	siCAV1	0
695	CAV 8	siCAV1	0
696	CAV 8	siCAV1	0
697	CAV 8	siCAV1	0
698	CAV 8	siCAV1	0
699	CAV 8	siCAV1	0
700	CAV 8	siCAV1	0
701	CAV 8	siCAV1	0
702	CAV 8	siCAV1	0
703	CAV 8	siCAV1	0
704	CAV 8	siCAV1	0
705	CAV 8	siCAV1	0
706	CAV 8	siCAV1	0
707	CAV 8	siCAV1	0
708	CAV 8	siCAV1	0
709	CAV 8	siCAV1	0
710	CAV 8	siCAV1	0
711	CAV 8	siCAV1	0
712	CAV 8	siCAV1	0
713	CAV 8	siCAV1	0
714	CAV 8	siCAV1	0
715	CAV 8	siCAV1	0
716	CAV 8	siCAV1	0
717	CAV 8	siCAV1	0
718	CAV 8	siCAV1	0
719	CAV 8	siCAV1	0
720	CAV 8	siCAV1	0
721	CAV 8	siCAV1	0
722	CAV 8	siCAV1	0
723	CAV 8	siCAV1	0
724	CAV 8	siCAV1	0
725	CAV 8	siCAV1	0
726	CAV 8	siCAV1	0
727	CAV 8	siCAV1	0
728	CAV 8	siCAV1	0
729	CAV 8	siCAV1	0
730	CAV 8	siCAV1	0
731	CAV 8	siCAV1	0
732	CAV 8	siCAV1	0
733	CAV 8	siCAV1	0
734	CAV 8	siCAV1	0
735	CAV 8	siCAV1	0
736	CAV 8	siCAV1	0
737	CAV 8	siCAV1	0
738	CAV 8	siCAV1	0
739	CAV 8	siCAV1	1
740	CAV 8	siCAV1	1
741	CAV 8	siCAV1	1
742	CAV 8	siCAV1	1
743	CAV 8	siCAV1	1
744	CAV 8	siCAV1	1
745	CAV 8	siCAV1	1
746	CAV 8	siCAV1	1
747	CAV 8	siCAV1	1
748	CAV 8	siCAV1	1
749	CAV 8	siCAV1	1
750	CAV 8	siCAV1	1
751	CAV 8	siCAV1	1
752	CAV 8	siCAV1	1
753	CAV 8	siCAV1	1
754	CAV 8	siCAV1	1
755	CAV 8	siCAV1	1
756	CAV 8	siCAV1	1
757	CAV 8	siCAV1	1
758	CAV 8	siCAV1	1
759	CAV 8	siCAV1	1
760	CAV 8	siCAV1	1
761	CAV 8	siCAV1	1
762	CAV 8	siCAV1	1
763	CAV 8	siCAV1	1
764	CAV 8	siCAV1	1
765	CAV 8	siCAV1	1
766	CAV 8	siCAV1	1
767	CAV 8	siCAV1	1
768	CAV 8	siCAV1	1
769	CAV 8	siCAV1	1
770	CAV 8	siCAV1	1
771	CAV 8	siCAV1	1
772	CAV 8	siCAV1	1
773	CAV 8	siCAV1	1
774	CAV 8	siCAV1	1
775	CAV 8	siCAV1	1
776	CAV 8	siCAV1	1
777	CAV 8	siCAV1	1
778	CAV 8	siCAV1	1
779	CAV 8	siCAV1	1
780	CAV 8	siCAV1	1
781	CAV 8	siCAV1	1
782	CAV 8	siCAV1	1
783	CAV 8	siCAV1	1
784	CAV 8	siCAV1	1
785	CAV 8	siCAV1	1
786	CAV 8	siCAV1	1
787	CAV 8	siCAV1	1
788	CAV 8	siCAV1	1
789	CAV 8	siCAV1	1
790	CAV 8	siCAV1	1
791	CAV 8	siCAV1	1
792	CAV 8	siCAV1	1
793	CAV 8	siCAV1	1
794	CAV 8	siCAV1	1
795	CAV 8	siCAV1	1
796	CAV 8	siCAV1	1
797	CAV 8	siCAV1	1
798	CAV 8	siCAV1	1
799	CAV 8	siCAV1	1
800	CAV 8	siCAV1	1
801	CAV 10	siCAV1	0
802	CAV 10	siCAV1	0
803	CAV 10	siCAV1	0
804	CAV 10	siCAV1	0
805	CAV 10	siCAV1	0
806	CAV 10	siCAV1	0
807	CAV 10	siCAV1	0
808	CAV 10	siCAV1	0
809	CAV 10	siCAV1	0
810	CAV 10	siCAV1	0
811	CAV 10	siCAV1	0
812	CAV 10	siCAV1	0
813	CAV 10	siCAV1	0
814	CAV 10	siCAV1	0
815	CAV 10	siCAV1	0
816	CAV 10	siCAV1	0
817	CAV 10	siCAV1	0
818	CAV 10	siCAV1	0
819	CAV 10	siCAV1	0
820	CAV 10	siCAV1	0
821	CAV 10	siCAV1	0
822	CAV 10	siCAV1	0
823	CAV 10	siCAV1	0
824	CAV 10	siCAV1	0
825	CAV 10	siCAV1	0
826	CAV 10	siCAV1	0
827	CAV 10	siCAV1	0
828	CAV 10	siCAV1	0
829	CAV 10	siCAV1	0
830	CAV 10	siCAV1	0
831	CAV 10	siCAV1	0
832	CAV 10	siCAV1	0
833	CAV 10	siCAV1	0
834	CAV 10	siCAV1	0
835	CAV 10	siCAV1	0
836	CAV 10	siCAV1	0
837	CAV 10	siCAV1	0
838	CAV 10	siCAV1	0
839	CAV 10	siCAV1	0
840	CAV 10	siCAV1	0
841	CAV 10	siCAV1	0
842	CAV 10	siCAV1	0
843	CAV 10	siCAV1	0
844	CAV 10	siCAV1	0
845	CAV 10	siCAV1	0
846	CAV 10	siCAV1	0
847	CAV 10	siCAV1	0
848	CAV 10	siCAV1	0
849	CAV 10	siCAV1	0
850	CAV 10	siCAV1	0
851	CAV 10	siCAV1	0
852	CAV 10	siCAV1	0
853	CAV 10	siCAV1	0
854	CAV 10	siCAV1	0
855	CAV 10	siCAV1	0
856	CAV 10	siCAV1	0
857	CAV 10	siCAV1	0
858	CAV 10	siCAV1	0
859	CAV 10	siCAV1	0
860	CAV 10	siCAV1	0
861	CAV 10	siCAV1	0
862	CAV 10	siCAV1	0
863	CAV 10	siCAV1	0
864	CAV 10	siCAV1	0
865	CAV 10	siCAV1	0
866	CAV 10	siCAV1	0
867	CAV 10	siCAV1	0
868	CAV 10	siCAV1	0
869	CAV 10	siCAV1	0
870	CAV 10	siCAV1	0
871	CAV 10	siCAV1	0
872	CAV 10	siCAV1	0
873	CAV 10	siCAV1	0
874	CAV 10	siCAV1	0
875	CAV 10	siCAV1	0
876	CAV 10	siCAV1	0
877	CAV 10	siCAV1	0
878	CAV 10	siCAV1	0
879	CAV 10	siCAV1	0
880	CAV 10	siCAV1	0
881	CAV 10	siCAV1	0
882	CAV 10	siCAV1	0
883	CAV 10	siCAV1	0
884	CAV 10	siCAV1	0
885	CAV 10	siCAV1	0
886	CAV 10	siCAV1	0
887	CAV 10	siCAV1	0
888	CAV 10	siCAV1	0
889	CAV 10	siCAV1	0
890	CAV 10	siCAV1	0
891	CAV 10	siCAV1	0
892	CAV 10	siCAV1	0
893	CAV 10	siCAV1	0
894	CAV 10	siCAV1	0
895	CAV 10	siCAV1	0
896	CAV 10	siCAV1	0
897	CAV 10	siCAV1	0
898	CAV 10	siCAV1	0
899	CAV 10	siCAV1	0
900	CAV 10	siCAV1	0
901	CAV 10	siCAV1	0
902	CAV 10	siCAV1	0
903	CAV 10	siCAV1	0
904	CAV 10	siCAV1	0
905	CAV 10	siCAV1	0
906	CAV 10	siCAV1	0
907	CAV 10	siCAV1	0
908	CAV 10	siCAV1	0
909	CAV 10	siCAV1	0
910	CAV 10	siCAV1	0
911	CAV 10	siCAV1	0
912	CAV 10	siCAV1	0
913	CAV 10	siCAV1	0
914	CAV 10	siCAV1	0
915	CAV 10	siCAV1	0
916	CAV 10	siCAV1	0
917	CAV 10	siCAV1	0
918	CAV 10	siCAV1	0
919	CAV 10	siCAV1	0
920	CAV 10	siCAV1	0
921	CAV 10	siCAV1	0
922	CAV 10	siCAV1	0
923	CAV 10	siCAV1	0
924	CAV 10	siCAV1	0
925	CAV 10	siCAV1	0
926	CAV 10	siCAV1	0
927	CAV 10	siCAV1	0
928	CAV 10	siCAV1	0
929	CAV 10	siCAV1	0
930	CAV 10	siCAV1	0
931	CAV 10	siCAV1	1
932	CAV 10	siCAV1	1
933	CAV 10	siCAV1	1
934	CAV 10	siCAV1	1
935	CAV 10	siCAV1	1
936	CAV 10	siCAV1	1
937	CAV 10	siCAV1	1
938	CAV 10	siCAV1	1
939	CAV 10	siCAV1	1
940	CAV 10	siCAV1	1
941	CAV 10	siCAV1	1
942	CAV 10	siCAV1	1
943	CAV 10	siCAV1	1
944	CAV 10	siCAV1	1
945	CAV 10	siCAV1	1
946	CAV 10	siCAV1	1
947	CAV 10	siCAV1	1
948	CAV 10	siCAV1	1
949	CAV 10	siCAV1	1
950	CAV 10	siCAV1	1
951	CAV 10	siCAV1	1
952	CAV 10	siCAV1	1
953	CAV 10	siCAV1	1
954	CAV 10	siCAV1	1
955	CAV 10	siCAV1	1
956	CAV 10	siCAV1	1
957	CAV 10	siCAV1	1
958	CAV 10	siCAV1	1
959	CAV 10	siCAV1	1
960	CAV 10	siCAV1	1
961	CAV 10	siCAV1	1
962	CAV 10	siCAV1	1
963	CAV 10	siCAV1	1
964	CAV 10	siCAV1	1
965	CAV 10	siCAV1	1
966	CAV 10	siCAV1	1
967	CAV 10	siCAV1	1
968	CAV 10	siCAV1	1
969	CAV 10	siCAV1	1
970	CAV 10	siCAV1	1
971	CAV 10	siCAV1	1
972	CAV 10	siCAV1	1
973	CAV 10	siCAV1	1
974	CAV 10	siCAV1	1
975	CAV 10	siCAV1	1
976	CAV 10	siCAV1	1
977	CAV 10	siCAV1	1
978	CAV 10	siCAV1	1
979	CAV 10	siCAV1	1
980	CAV 10	siCAV1	1
981	CAV 10	siCAV1	1
982	CAV 10	siCAV1	1
983	CAV 10	siCAV1	1
984	CAV 10	siCAV1	1
985	CAV 10	siCAV1	1
986	CAV 10	siCAV1	1
987	CAV 10	siCAV1	1
988	CAV 10	siCAV1	1
989	CAV 10	siCAV1	1
990	CAV 10	siCAV1	1
991	CAV 10	siCAV1	1
992	CAV 10	siCAV1	1
993	CAV 10	siCAV1	1
994	CAV 10	siCAV1	1
995	CAV 10	siCAV1	1
996	CAV 10	siCAV1	1
997	CAV 10	siCAV1	1
998	CAV 10	siCAV1	1
999	CAV 10	siCAV1	1
1000	CAV 10	siCAV1	1
1001	CAV 11	siCAV1	0
1002	CAV 11	siCAV1	0
1003	CAV 11	siCAV1	0
1004	CAV 11	siCAV1	0
1005	CAV 11	siCAV1	0
1006	CAV 11	siCAV1	0
1007	CAV 11	siCAV1	0
1008	CAV 11	siCAV1	0
1009	CAV 11	siCAV1	0
1010	CAV 11	siCAV1	0
1011	CAV 11	siCAV1	0
1012	CAV 11	siCAV1	0
1013	CAV 11	siCAV1	0
1014	CAV 11	siCAV1	0
1015	CAV 11	siCAV1	0
1016	CAV 11	siCAV1	0
1017	CAV 11	siCAV1	0
1018	CAV 11	siCAV1	0
1019	CAV 11	siCAV1	0
1020	CAV 11	siCAV1	0
1021	CAV 11	siCAV1	0
1022	CAV 11	siCAV1	0
1023	CAV 11	siCAV1	0
1024	CAV 11	siCAV1	0
1025	CAV 11	siCAV1	0
1026	CAV 11	siCAV1	0
1027	CAV 11	siCAV1	0
1028	CAV 11	siCAV1	0
1029	CAV 11	siCAV1	0
1030	CAV 11	siCAV1	0
1031	CAV 11	siCAV1	0
1032	CAV 11	siCAV1	0
1033	CAV 11	siCAV1	0
1034	CAV 11	siCAV1	0
1035	CAV 11	siCAV1	0
1036	CAV 11	siCAV1	0
1037	CAV 11	siCAV1	0
1038	CAV 11	siCAV1	0
1039	CAV 11	siCAV1	0
1040	CAV 11	siCAV1	0
1041	CAV 11	siCAV1	0
1042	CAV 11	siCAV1	0
1043	CAV 11	siCAV1	0
1044	CAV 11	siCAV1	0
1045	CAV 11	siCAV1	0
1046	CAV 11	siCAV1	0
1047	CAV 11	siCAV1	0
1048	CAV 11	siCAV1	0
1049	CAV 11	siCAV1	0
1050	CAV 11	siCAV1	0
1051	CAV 11	siCAV1	0
1052	CAV 11	siCAV1	0
1053	CAV 11	siCAV1	0
1054	CAV 11	siCAV1	0
1055	CAV 11	siCAV1	0
1056	CAV 11	siCAV1	0
1057	CAV 11	siCAV1	0
1058	CAV 11	siCAV1	0
1059	CAV 11	siCAV1	0
1060	CAV 11	siCAV1	0
1061	CAV 11	siCAV1	0
1062	CAV 11	siCAV1	0
1063	CAV 11	siCAV1	0
1064	CAV 11	siCAV1	0
1065	CAV 11	siCAV1	0
1066	CAV 11	siCAV1	0
1067	CAV 11	siCAV1	0
1068	CAV 11	siCAV1	0
1069	CAV 11	siCAV1	0
1070	CAV 11	siCAV1	0
1071	CAV 11	siCAV1	0
1072	CAV 11	siCAV1	0
1073	CAV 11	siCAV1	0
1074	CAV 11	siCAV1	0
1075	CAV 11	siCAV1	0
1076	CAV 11	siCAV1	0
1077	CAV 11	siCAV1	0
1078	CAV 11	siCAV1	0
1079	CAV 11	siCAV1	0
1080	CAV 11	siCAV1	0
1081	CAV 11	siCAV1	0
1082	CAV 11	siCAV1	0
1083	CAV 11	siCAV1	0
1084	CAV 11	siCAV1	0
1085	CAV 11	siCAV1	0
1086	CAV 11	siCAV1	0
1087	CAV 11	siCAV1	0
1088	CAV 11	siCAV1	0
1089	CAV 11	siCAV1	0
1090	CAV 11	siCAV1	0
1091	CAV 11	siCAV1	0
1092	CAV 11	siCAV1	0
1093	CAV 11	siCAV1	0
1094	CAV 11	siCAV1	0
1095	CAV 11	siCAV1	0
1096	CAV 11	siCAV1	0
1097	CAV 11	siCAV1	0
1098	CAV 11	siCAV1	0
1099	CAV 11	siCAV1	0
1100	CAV 11	siCAV1	0
1101	CAV 11	siCAV1	0
1102	CAV 11	siCAV1	0
1103	CAV 11	siCAV1	0
1104	CAV 11	siCAV1	0
1105	CAV 11	siCAV1	0
1106	CAV 11	siCAV1	0
1107	CAV 11	siCAV1	0
1108	CAV 11	siCAV1	0
1109	CAV 11	siCAV1	0
1110	CAV 11	siCAV1	0
1111	CAV 11	siCAV1	0
1112	CAV 11	siCAV1	0
1113	CAV 11	siCAV1	0
1114	CAV 11	siCAV1	0
1115	CAV 11	siCAV1	0
1116	CAV 11	siCAV1	0
1117	CAV 11	siCAV1	0
1118	CAV 11	siCAV1	0
1119	CAV 11	siCAV1	0
1120	CAV 11	siCAV1	0
1121	CAV 11	siCAV1	0
1122	CAV 11	siCAV1	0
1123	CAV 11	siCAV1	0
1124	CAV 11	siCAV1	0
1125	CAV 11	siCAV1	0
1126	CAV 11	siCAV1	0
1127	CAV 11	siCAV1	0
1128	CAV 11	siCAV1	0
1129	CAV 11	siCAV1	0
1130	CAV 11	siCAV1	0
1131	CAV 11	siCAV1	0
1132	CAV 11	siCAV1	0
1133	CAV 11	siCAV1	0
1134	CAV 11	siCAV1	0
1135	CAV 11	siCAV1	0
1136	CAV 11	siCAV1	0
1137	CAV 11	siCAV1	0
1138	CAV 11	siCAV1	0
1139	CAV 11	siCAV1	0
1140	CAV 11	siCAV1	0
1141	CAV 11	siCAV1	0
1142	CAV 11	siCAV1	0
1143	CAV 11	siCAV1	1
1144	CAV 11	siCAV1	1
1145	CAV 11	siCAV1	1
1146	CAV 11	siCAV1	1
1147	CAV 11	siCAV1	1
1148	CAV 11	siCAV1	1
1149	CAV 11	siCAV1	1
1150	CAV 11	siCAV1	1
1151	CAV 11	siCAV1	1
1152	CAV 11	siCAV1	1
1153	CAV 11	siCAV1	1
1154	CAV 11	siCAV1	1
1155	CAV 11	siCAV1	1
1156	CAV 11	siCAV1	1
1157	CAV 11	siCAV1	1
1158	CAV 11	siCAV1	1
1159	CAV 11	siCAV1	1
1160	CAV 11	siCAV1	1
1161	CAV 11	siCAV1	1
1162	CAV 11	siCAV1	1
1163	CAV 11	siCAV1	1
1164	CAV 11	siCAV1	1
1165	CAV 11	siCAV1	1
1166	CAV 11	siCAV1	1
1167	CAV 11	siCAV1	1
1168	CAV 11	siCAV1	1
1169	CAV 11	siCAV1	1
1170	CAV 11	siCAV1	1
1171	CAV 11	siCAV1	1
1172	CAV 11	siCAV1	1
1173	CAV 11	siCAV1	1
1174	CAV 11	siCAV1	1
1175	CAV 11	siCAV1	1
1176	CAV 11	siCAV1	1
1177	CAV 11	siCAV1	1
1178	CAV 11	siCAV1	1
1179	CAV 11	siCAV1	1
1180	CAV 11	siCAV1	1
1181	CAV 11	siCAV1	1
1182	CAV 11	siCAV1	1
1183	CAV 11	siCAV1	1
1184	CAV 11	siCAV1	1
1185	CAV 11	siCAV1	1
1186	CAV 11	siCAV1	1
1187	CAV 11	siCAV1	1
1188	CAV 11	siCAV1	1
1189	CAV 11	siCAV1	1
1190	CAV 11	siCAV1	1
1191	CAV 11	siCAV1	1
1192	CAV 11	siCAV1	1
1193	CAV 11	siCAV1	1
1194	CAV 11	siCAV1	1
1195	CAV 11	siCAV1	1
1196	CAV 11	siCAV1	1
1197	CAV 11	siCAV1	1
1198	CAV 11	siCAV1	1
1199	CAV 11	siCAV1	1
1200	CAV 11	siCAV1	1
1401	CAV 17	siCAV1	0
1402	CAV 17	siCAV1	0
1403	CAV 17	siCAV1	0
1404	CAV 17	siCAV1	0
1405	CAV 17	siCAV1	0
1406	CAV 17	siCAV1	0
1407	CAV 17	siCAV1	0
1408	CAV 17	siCAV1	0
1409	CAV 17	siCAV1	0
1410	CAV 17	siCAV1	0
1411	CAV 17	siCAV1	0
1412	CAV 17	siCAV1	0
1413	CAV 17	siCAV1	0
1414	CAV 17	siCAV1	0
1415	CAV 17	siCAV1	0
1416	CAV 17	siCAV1	0
1417	CAV 17	siCAV1	0
1418	CAV 17	siCAV1	0
1419	CAV 17	siCAV1	0
1420	CAV 17	siCAV1	0
1421	CAV 17	siCAV1	0
1422	CAV 17	siCAV1	0
1423	CAV 17	siCAV1	0
1424	CAV 17	siCAV1	0
1425	CAV 17	siCAV1	0
1426	CAV 17	siCAV1	0
1427	CAV 17	siCAV1	0
1428	CAV 17	siCAV1	0
1429	CAV 17	siCAV1	0
1430	CAV 17	siCAV1	0
1431	CAV 17	siCAV1	0
1432	CAV 17	siCAV1	0
1433	CAV 17	siCAV1	0
1434	CAV 17	siCAV1	0
1435	CAV 17	siCAV1	0
1436	CAV 17	siCAV1	0
1437	CAV 17	siCAV1	0
1438	CAV 17	siCAV1	0
1439	CAV 17	siCAV1	0
1440	CAV 17	siCAV1	0
1441	CAV 17	siCAV1	0
1442	CAV 17	siCAV1	0
1443	CAV 17	siCAV1	0
1444	CAV 17	siCAV1	0
1445	CAV 17	siCAV1	0
1446	CAV 17	siCAV1	0
1447	CAV 17	siCAV1	0
1448	CAV 17	siCAV1	0
1449	CAV 17	siCAV1	0
1450	CAV 17	siCAV1	0
1451	CAV 17	siCAV1	0
1452	CAV 17	siCAV1	0
1453	CAV 17	siCAV1	0
1454	CAV 17	siCAV1	0
1455	CAV 17	siCAV1	0
1456	CAV 17	siCAV1	0
1457	CAV 17	siCAV1	0
1458	CAV 17	siCAV1	0
1459	CAV 17	siCAV1	0
1460	CAV 17	siCAV1	0
1461	CAV 17	siCAV1	0
1462	CAV 17	siCAV1	0
1463	CAV 17	siCAV1	0
1464	CAV 17	siCAV1	0
1465	CAV 17	siCAV1	0
1466	CAV 17	siCAV1	0
1467	CAV 17	siCAV1	0
1468	CAV 17	siCAV1	0
1469	CAV 17	siCAV1	0
1470	CAV 17	siCAV1	0
1471	CAV 17	siCAV1	0
1472	CAV 17	siCAV1	0
1473	CAV 17	siCAV1	0
1474	CAV 17	siCAV1	0
1475	CAV 17	siCAV1	0
1476	CAV 17	siCAV1	0
1477	CAV 17	siCAV1	0
1478	CAV 17	siCAV1	0
1479	CAV 17	siCAV1	0
1480	CAV 17	siCAV1	0
1481	CAV 17	siCAV1	0
1482	CAV 17	siCAV1	0
1483	CAV 17	siCAV1	0
1484	CAV 17	siCAV1	0
1485	CAV 17	siCAV1	0
1486	CAV 17	siCAV1	0
1487	CAV 17	siCAV1	0
1488	CAV 17	siCAV1	0
1489	CAV 17	siCAV1	0
1490	CAV 17	siCAV1	0
1491	CAV 17	siCAV1	0
1492	CAV 17	siCAV1	0
1493	CAV 17	siCAV1	0
1494	CAV 17	siCAV1	0
1495	CAV 17	siCAV1	0
1496	CAV 17	siCAV1	0
1497	CAV 17	siCAV1	0
1498	CAV 17	siCAV1	0
1499	CAV 17	siCAV1	0
1500	CAV 17	siCAV1	0
1501	CAV 17	siCAV1	0
1502	CAV 17	siCAV1	0
1503	CAV 17	siCAV1	0
1504	CAV 17	siCAV1	0
1505	CAV 17	siCAV1	0
1506	CAV 17	siCAV1	0
1507	CAV 17	siCAV1	0
1508	CAV 17	siCAV1	0
1509	CAV 17	siCAV1	0
1510	CAV 17	siCAV1	0
1511	CAV 17	siCAV1	0
1512	CAV 17	siCAV1	0
1513	CAV 17	siCAV1	0
1514	CAV 17	siCAV1	0
1515	CAV 17	siCAV1	0
1516	CAV 17	siCAV1	0
1517	CAV 17	siCAV1	0
1518	CAV 17	siCAV1	0
1519	CAV 17	siCAV1	0
1520	CAV 17	siCAV1	0
1521	CAV 17	siCAV1	0
1522	CAV 17	siCAV1	0
1523	CAV 17	siCAV1	0
1524	CAV 17	siCAV1	0
1525	CAV 17	siCAV1	0
1526	CAV 17	siCAV1	0
1527	CAV 17	siCAV1	0
1528	CAV 17	siCAV1	0
1529	CAV 17	siCAV1	0
1530	CAV 17	siCAV1	0
1531	CAV 17	siCAV1	0
1532	CAV 17	siCAV1	0
1533	CAV 17	siCAV1	0
1534	CAV 17	siCAV1	0
1535	CAV 17	siCAV1	0
1536	CAV 17	siCAV1	0
1537	CAV 17	siCAV1	0
1538	CAV 17	siCAV1	0
1539	CAV 17	siCAV1	0
1540	CAV 17	siCAV1	0
1541	CAV 17	siCAV1	0
1542	CAV 17	siCAV1	0
1543	CAV 17	siCAV1	0
1544	CAV 17	siCAV1	0
1545	CAV 17	siCAV1	0
1546	CAV 17	siCAV1	1
1547	CAV 17	siCAV1	1
1548	CAV 17	siCAV1	1
1549	CAV 17	siCAV1	1
1550	CAV 17	siCAV1	1
1551	CAV 17	siCAV1	1
1552	CAV 17	siCAV1	1
1553	CAV 17	siCAV1	1
1554	CAV 17	siCAV1	1
1555	CAV 17	siCAV1	1
1556	CAV 17	siCAV1	1
1557	CAV 17	siCAV1	1
1558	CAV 17	siCAV1	1
1559	CAV 17	siCAV1	1
1560	CAV 17	siCAV1	1
1561	CAV 17	siCAV1	1
1562	CAV 17	siCAV1	1
1563	CAV 17	siCAV1	1
1564	CAV 17	siCAV1	1
1565	CAV 17	siCAV1	1
1566	CAV 17	siCAV1	1
1567	CAV 17	siCAV1	1
1568	CAV 17	siCAV1	1
1569	CAV 17	siCAV1	1
1570	CAV 17	siCAV1	1
1571	CAV 17	siCAV1	1
1572	CAV 17	siCAV1	1
1573	CAV 17	siCAV1	1
1574	CAV 17	siCAV1	1
1575	CAV 17	siCAV1	1
1576	CAV 17	siCAV1	1
1577	CAV 17	siCAV1	1
1578	CAV 17	siCAV1	1
1579	CAV 17	siCAV1	1
1580	CAV 17	siCAV1	1
1581	CAV 17	siCAV1	1
1582	CAV 17	siCAV1	1
1583	CAV 17	siCAV1	1
1584	CAV 17	siCAV1	1
1585	CAV 17	siCAV1	1
1586	CAV 17	siCAV1	1
1587	CAV 17	siCAV1	1
1588	CAV 17	siCAV1	1
1589	CAV 17	siCAV1	1
1590	CAV 17	siCAV1	1
1591	CAV 17	siCAV1	1
1592	CAV 17	siCAV1	1
1593	CAV 17	siCAV1	1
1594	CAV 17	siCAV1	1
1595	CAV 17	siCAV1	1
1596	CAV 17	siCAV1	1
1597	CAV 17	siCAV1	1
1598	CAV 17	siCAV1	1
1599	CAV 17	siCAV1	1
1600	CAV 17	siCAV1	1
1	CAV 1	siCTRL	0
2	CAV 1	siCTRL	0
3	CAV 1	siCTRL	0
4	CAV 1	siCTRL	0
5	CAV 1	siCTRL	0
6	CAV 1	siCTRL	0
7	CAV 1	siCTRL	0
8	CAV 1	siCTRL	0
9	CAV 1	siCTRL	0
10	CAV 1	siCTRL	0
11	CAV 1	siCTRL	0
12	CAV 1	siCTRL	0
13	CAV 1	siCTRL	0
14	CAV 1	siCTRL	0
15	CAV 1	siCTRL	0
16	CAV 1	siCTRL	0
17	CAV 1	siCTRL	0
18	CAV 1	siCTRL	0
19	CAV 1	siCTRL	0
20	CAV 1	siCTRL	0
21	CAV 1	siCTRL	0
22	CAV 1	siCTRL	0
23	CAV 1	siCTRL	0
24	CAV 1	siCTRL	0
25	CAV 1	siCTRL	0
26	CAV 1	siCTRL	0
27	CAV 1	siCTRL	0
28	CAV 1	siCTRL	0
29	CAV 1	siCTRL	0
30	CAV 1	siCTRL	0
31	CAV 1	siCTRL	0
32	CAV 1	siCTRL	0
33	CAV 1	siCTRL	0
34	CAV 1	siCTRL	0
35	CAV 1	siCTRL	0
36	CAV 1	siCTRL	0
37	CAV 1	siCTRL	0
38	CAV 1	siCTRL	0
39	CAV 1	siCTRL	0
40	CAV 1	siCTRL	0
41	CAV 1	siCTRL	0
42	CAV 1	siCTRL	0
43	CAV 1	siCTRL	0
44	CAV 1	siCTRL	0
45	CAV 1	siCTRL	0
46	CAV 1	siCTRL	0
47	CAV 1	siCTRL	0
48	CAV 1	siCTRL	0
49	CAV 1	siCTRL	0
50	CAV 1	siCTRL	0
51	CAV 1	siCTRL	0
52	CAV 1	siCTRL	0
53	CAV 1	siCTRL	0
54	CAV 1	siCTRL	0
55	CAV 1	siCTRL	0
56	CAV 1	siCTRL	0
57	CAV 1	siCTRL	0
58	CAV 1	siCTRL	0
59	CAV 1	siCTRL	0
60	CAV 1	siCTRL	0
61	CAV 1	siCTRL	1
62	CAV 1	siCTRL	1
63	CAV 1	siCTRL	1
64	CAV 1	siCTRL	1
65	CAV 1	siCTRL	1
66	CAV 1	siCTRL	1
67	CAV 1	siCTRL	1
68	CAV 1	siCTRL	1
69	CAV 1	siCTRL	1
70	CAV 1	siCTRL	1
71	CAV 1	siCTRL	1
72	CAV 1	siCTRL	1
73	CAV 1	siCTRL	1
74	CAV 1	siCTRL	1
75	CAV 1	siCTRL	1
76	CAV 1	siCTRL	1
77	CAV 1	siCTRL	1
78	CAV 1	siCTRL	1
79	CAV 1	siCTRL	1
80	CAV 1	siCTRL	1
81	CAV 1	siCTRL	1
82	CAV 1	siCTRL	1
83	CAV 1	siCTRL	1
84	CAV 1	siCTRL	1
85	CAV 1	siCTRL	1
86	CAV 1	siCTRL	1
87	CAV 1	siCTRL	1
88	CAV 1	siCTRL	1
89	CAV 1	siCTRL	1
90	CAV 1	siCTRL	1
91	CAV 1	siCTRL	1
92	CAV 1	siCTRL	1
93	CAV 1	siCTRL	1
94	CAV 1	siCTRL	1
95	CAV 1	siCTRL	1
96	CAV 1	siCTRL	1
97	CAV 1	siCTRL	1
98	CAV 1	siCTRL	1
99	CAV 1	siCTRL	1
100	CAV 1	siCTRL	1
101	CAV 2	siCTRL	0
102	CAV 2	siCTRL	0
103	CAV 2	siCTRL	0
104	CAV 2	siCTRL	0
105	CAV 2	siCTRL	0
106	CAV 2	siCTRL	0
107	CAV 2	siCTRL	0
108	CAV 2	siCTRL	0
109	CAV 2	siCTRL	0
110	CAV 2	siCTRL	0
111	CAV 2	siCTRL	0
112	CAV 2	siCTRL	0
113	CAV 2	siCTRL	0
114	CAV 2	siCTRL	0
115	CAV 2	siCTRL	0
116	CAV 2	siCTRL	0
117	CAV 2	siCTRL	0
118	CAV 2	siCTRL	0
119	CAV 2	siCTRL	0
120	CAV 2	siCTRL	0
121	CAV 2	siCTRL	0
122	CAV 2	siCTRL	0
123	CAV 2	siCTRL	0
124	CAV 2	siCTRL	0
125	CAV 2	siCTRL	0
126	CAV 2	siCTRL	0
127	CAV 2	siCTRL	0
128	CAV 2	siCTRL	0
129	CAV 2	siCTRL	0
130	CAV 2	siCTRL	0
131	CAV 2	siCTRL	0
132	CAV 2	siCTRL	0
133	CAV 2	siCTRL	0
134	CAV 2	siCTRL	0
135	CAV 2	siCTRL	0
136	CAV 2	siCTRL	0
137	CAV 2	siCTRL	0
138	CAV 2	siCTRL	0
139	CAV 2	siCTRL	0
140	CAV 2	siCTRL	0
141	CAV 2	siCTRL	0
142	CAV 2	siCTRL	0
143	CAV 2	siCTRL	0
144	CAV 2	siCTRL	0
145	CAV 2	siCTRL	0
146	CAV 2	siCTRL	0
147	CAV 2	siCTRL	0
148	CAV 2	siCTRL	0
149	CAV 2	siCTRL	0
150	CAV 2	siCTRL	0
151	CAV 2	siCTRL	0
152	CAV 2	siCTRL	0
153	CAV 2	siCTRL	0
154	CAV 2	siCTRL	0
155	CAV 2	siCTRL	0
156	CAV 2	siCTRL	0
157	CAV 2	siCTRL	0
158	CAV 2	siCTRL	0
159	CAV 2	siCTRL	0
160	CAV 2	siCTRL	0
161	CAV 2	siCTRL	1
162	CAV 2	siCTRL	1
163	CAV 2	siCTRL	1
164	CAV 2	siCTRL	1
165	CAV 2	siCTRL	1
166	CAV 2	siCTRL	1
167	CAV 2	siCTRL	1
168	CAV 2	siCTRL	1
169	CAV 2	siCTRL	1
170	CAV 2	siCTRL	1
171	CAV 2	siCTRL	1
172	CAV 2	siCTRL	1
173	CAV 2	siCTRL	1
174	CAV 2	siCTRL	1
175	CAV 2	siCTRL	1
176	CAV 2	siCTRL	1
177	CAV 2	siCTRL	1
178	CAV 2	siCTRL	1
179	CAV 2	siCTRL	1
180	CAV 2	siCTRL	1
181	CAV 2	siCTRL	1
182	CAV 2	siCTRL	1
183	CAV 2	siCTRL	1
184	CAV 2	siCTRL	1
185	CAV 2	siCTRL	1
186	CAV 2	siCTRL	1
187	CAV 2	siCTRL	1
188	CAV 2	siCTRL	1
189	CAV 2	siCTRL	1
190	CAV 2	siCTRL	1
191	CAV 2	siCTRL	1
192	CAV 2	siCTRL	1
193	CAV 2	siCTRL	1
194	CAV 2	siCTRL	1
195	CAV 2	siCTRL	1
196	CAV 2	siCTRL	1
197	CAV 2	siCTRL	1
198	CAV 2	siCTRL	1
199	CAV 2	siCTRL	1
200	CAV 2	siCTRL	1
201	CAV 5	siCTRL	0
202	CAV 5	siCTRL	0
203	CAV 5	siCTRL	0
204	CAV 5	siCTRL	0
205	CAV 5	siCTRL	0
206	CAV 5	siCTRL	0
207	CAV 5	siCTRL	0
208	CAV 5	siCTRL	0
209	CAV 5	siCTRL	0
210	CAV 5	siCTRL	0
211	CAV 5	siCTRL	0
212	CAV 5	siCTRL	0
213	CAV 5	siCTRL	0
214	CAV 5	siCTRL	0
215	CAV 5	siCTRL	0
216	CAV 5	siCTRL	0
217	CAV 5	siCTRL	0
218	CAV 5	siCTRL	0
219	CAV 5	siCTRL	0
220	CAV 5	siCTRL	0
221	CAV 5	siCTRL	0
222	CAV 5	siCTRL	0
223	CAV 5	siCTRL	0
224	CAV 5	siCTRL	0
225	CAV 5	siCTRL	0
226	CAV 5	siCTRL	0
227	CAV 5	siCTRL	0
228	CAV 5	siCTRL	0
229	CAV 5	siCTRL	0
230	CAV 5	siCTRL	0
231	CAV 5	siCTRL	0
232	CAV 5	siCTRL	0
233	CAV 5	siCTRL	0
234	CAV 5	siCTRL	0
235	CAV 5	siCTRL	0
236	CAV 5	siCTRL	0
237	CAV 5	siCTRL	0
238	CAV 5	siCTRL	0
239	CAV 5	siCTRL	0
240	CAV 5	siCTRL	0
241	CAV 5	siCTRL	0
242	CAV 5	siCTRL	0
243	CAV 5	siCTRL	0
244	CAV 5	siCTRL	0
245	CAV 5	siCTRL	0
246	CAV 5	siCTRL	0
247	CAV 5	siCTRL	0
248	CAV 5	siCTRL	0
249	CAV 5	siCTRL	0
250	CAV 5	siCTRL	0
251	CAV 5	siCTRL	0
252	CAV 5	siCTRL	0
253	CAV 5	siCTRL	0
254	CAV 5	siCTRL	0
255	CAV 5	siCTRL	0
256	CAV 5	siCTRL	0
257	CAV 5	siCTRL	0
258	CAV 5	siCTRL	0
259	CAV 5	siCTRL	0
260	CAV 5	siCTRL	0
261	CAV 5	siCTRL	0
262	CAV 5	siCTRL	0
263	CAV 5	siCTRL	0
264	CAV 5	siCTRL	0
265	CAV 5	siCTRL	0
266	CAV 5	siCTRL	0
267	CAV 5	siCTRL	0
268	CAV 5	siCTRL	0
269	CAV 5	siCTRL	0
270	CAV 5	siCTRL	0
271	CAV 5	siCTRL	0
272	CAV 5	siCTRL	0
273	CAV 5	siCTRL	0
274	CAV 5	siCTRL	0
275	CAV 5	siCTRL	0
276	CAV 5	siCTRL	0
277	CAV 5	siCTRL	0
278	CAV 5	siCTRL	0
279	CAV 5	siCTRL	0
280	CAV 5	siCTRL	0
281	CAV 5	siCTRL	0
282	CAV 5	siCTRL	0
283	CAV 5	siCTRL	0
284	CAV 5	siCTRL	0
285	CAV 5	siCTRL	0
286	CAV 5	siCTRL	0
287	CAV 5	siCTRL	0
288	CAV 5	siCTRL	0
289	CAV 5	siCTRL	0
290	CAV 5	siCTRL	0
291	CAV 5	siCTRL	0
292	CAV 5	siCTRL	0
293	CAV 5	siCTRL	0
294	CAV 5	siCTRL	0
295	CAV 5	siCTRL	0
296	CAV 5	siCTRL	0
297	CAV 5	siCTRL	0
298	CAV 5	siCTRL	0
299	CAV 5	siCTRL	0
300	CAV 5	siCTRL	0
301	CAV 5	siCTRL	0
302	CAV 5	siCTRL	0
303	CAV 5	siCTRL	0
304	CAV 5	siCTRL	0
305	CAV 5	siCTRL	0
306	CAV 5	siCTRL	0
307	CAV 5	siCTRL	0
308	CAV 5	siCTRL	0
309	CAV 5	siCTRL	0
310	CAV 5	siCTRL	0
311	CAV 5	siCTRL	0
312	CAV 5	siCTRL	0
313	CAV 5	siCTRL	0
314	CAV 5	siCTRL	0
315	CAV 5	siCTRL	0
316	CAV 5	siCTRL	0
317	CAV 5	siCTRL	0
318	CAV 5	siCTRL	0
319	CAV 5	siCTRL	0
320	CAV 5	siCTRL	0
321	CAV 5	siCTRL	0
322	CAV 5	siCTRL	0
323	CAV 5	siCTRL	0
324	CAV 5	siCTRL	0
325	CAV 5	siCTRL	0
326	CAV 5	siCTRL	0
327	CAV 5	siCTRL	0
328	CAV 5	siCTRL	0
329	CAV 5	siCTRL	1
330	CAV 5	siCTRL	1
331	CAV 5	siCTRL	1
332	CAV 5	siCTRL	1
333	CAV 5	siCTRL	1
334	CAV 5	siCTRL	1
335	CAV 5	siCTRL	1
336	CAV 5	siCTRL	1
337	CAV 5	siCTRL	1
338	CAV 5	siCTRL	1
339	CAV 5	siCTRL	1
340	CAV 5	siCTRL	1
341	CAV 5	siCTRL	1
342	CAV 5	siCTRL	1
343	CAV 5	siCTRL	1
344	CAV 5	siCTRL	1
345	CAV 5	siCTRL	1
346	CAV 5	siCTRL	1
347	CAV 5	siCTRL	1
348	CAV 5	siCTRL	1
349	CAV 5	siCTRL	1
350	CAV 5	siCTRL	1
351	CAV 5	siCTRL	1
352	CAV 5	siCTRL	1
353	CAV 5	siCTRL	1
354	CAV 5	siCTRL	1
355	CAV 5	siCTRL	1
356	CAV 5	siCTRL	1
357	CAV 5	siCTRL	1
358	CAV 5	siCTRL	1
359	CAV 5	siCTRL	1
360	CAV 5	siCTRL	1
361	CAV 5	siCTRL	1
362	CAV 5	siCTRL	1
363	CAV 5	siCTRL	1
364	CAV 5	siCTRL	1
365	CAV 5	siCTRL	1
366	CAV 5	siCTRL	1
367	CAV 5	siCTRL	1
368	CAV 5	siCTRL	1
369	CAV 5	siCTRL	1
370	CAV 5	siCTRL	1
371	CAV 5	siCTRL	1
372	CAV 5	siCTRL	1
373	CAV 5	siCTRL	1
374	CAV 5	siCTRL	1
375	CAV 5	siCTRL	1
376	CAV 5	siCTRL	1
377	CAV 5	siCTRL	1
378	CAV 5	siCTRL	1
379	CAV 5	siCTRL	1
380	CAV 5	siCTRL	1
381	CAV 5	siCTRL	1
382	CAV 5	siCTRL	1
383	CAV 5	siCTRL	1
384	CAV 5	siCTRL	1
385	CAV 5	siCTRL	1
386	CAV 5	siCTRL	1
387	CAV 5	siCTRL	1
388	CAV 5	siCTRL	1
389	CAV 5	siCTRL	1
390	CAV 5	siCTRL	1
391	CAV 5	siCTRL	1
392	CAV 5	siCTRL	1
393	CAV 5	siCTRL	1
394	CAV 5	siCTRL	1
395	CAV 5	siCTRL	1
396	CAV 5	siCTRL	1
397	CAV 5	siCTRL	1
398	CAV 5	siCTRL	1
399	CAV 5	siCTRL	1
400	CAV 5	siCTRL	1
401	CAV 6	siCTRL	0
402	CAV 6	siCTRL	0
403	CAV 6	siCTRL	0
404	CAV 6	siCTRL	0
405	CAV 6	siCTRL	0
406	CAV 6	siCTRL	0
407	CAV 6	siCTRL	0
408	CAV 6	siCTRL	0
409	CAV 6	siCTRL	0
410	CAV 6	siCTRL	0
411	CAV 6	siCTRL	0
412	CAV 6	siCTRL	0
413	CAV 6	siCTRL	0
414	CAV 6	siCTRL	0
415	CAV 6	siCTRL	0
416	CAV 6	siCTRL	0
417	CAV 6	siCTRL	0
418	CAV 6	siCTRL	0
419	CAV 6	siCTRL	0
420	CAV 6	siCTRL	0
421	CAV 6	siCTRL	0
422	CAV 6	siCTRL	0
423	CAV 6	siCTRL	0
424	CAV 6	siCTRL	0
425	CAV 6	siCTRL	0
426	CAV 6	siCTRL	0
427	CAV 6	siCTRL	0
428	CAV 6	siCTRL	0
429	CAV 6	siCTRL	0
430	CAV 6	siCTRL	0
431	CAV 6	siCTRL	0
432	CAV 6	siCTRL	0
433	CAV 6	siCTRL	0
434	CAV 6	siCTRL	0
435	CAV 6	siCTRL	0
436	CAV 6	siCTRL	0
437	CAV 6	siCTRL	0
438	CAV 6	siCTRL	0
439	CAV 6	siCTRL	0
440	CAV 6	siCTRL	0
441	CAV 6	siCTRL	0
442	CAV 6	siCTRL	0
443	CAV 6	siCTRL	0
444	CAV 6	siCTRL	0
445	CAV 6	siCTRL	0
446	CAV 6	siCTRL	0
447	CAV 6	siCTRL	0
448	CAV 6	siCTRL	0
449	CAV 6	siCTRL	0
450	CAV 6	siCTRL	0
451	CAV 6	siCTRL	0
452	CAV 6	siCTRL	0
453	CAV 6	siCTRL	0
454	CAV 6	siCTRL	0
455	CAV 6	siCTRL	0
456	CAV 6	siCTRL	0
457	CAV 6	siCTRL	0
458	CAV 6	siCTRL	0
459	CAV 6	siCTRL	0
460	CAV 6	siCTRL	0
461	CAV 6	siCTRL	0
462	CAV 6	siCTRL	0
463	CAV 6	siCTRL	0
464	CAV 6	siCTRL	0
465	CAV 6	siCTRL	0
466	CAV 6	siCTRL	0
467	CAV 6	siCTRL	0
468	CAV 6	siCTRL	0
469	CAV 6	siCTRL	0
470	CAV 6	siCTRL	0
471	CAV 6	siCTRL	0
472	CAV 6	siCTRL	0
473	CAV 6	siCTRL	0
474	CAV 6	siCTRL	0
475	CAV 6	siCTRL	0
476	CAV 6	siCTRL	0
477	CAV 6	siCTRL	0
478	CAV 6	siCTRL	0
479	CAV 6	siCTRL	0
480	CAV 6	siCTRL	0
481	CAV 6	siCTRL	0
482	CAV 6	siCTRL	0
483	CAV 6	siCTRL	0
484	CAV 6	siCTRL	0
485	CAV 6	siCTRL	0
486	CAV 6	siCTRL	0
487	CAV 6	siCTRL	0
488	CAV 6	siCTRL	0
489	CAV 6	siCTRL	0
490	CAV 6	siCTRL	0
491	CAV 6	siCTRL	0
492	CAV 6	siCTRL	0
493	CAV 6	siCTRL	0
494	CAV 6	siCTRL	0
495	CAV 6	siCTRL	0
496	CAV 6	siCTRL	0
497	CAV 6	siCTRL	0
498	CAV 6	siCTRL	0
499	CAV 6	siCTRL	0
500	CAV 6	siCTRL	0
501	CAV 6	siCTRL	0
502	CAV 6	siCTRL	0
503	CAV 6	siCTRL	0
504	CAV 6	siCTRL	0
505	CAV 6	siCTRL	0
506	CAV 6	siCTRL	0
507	CAV 6	siCTRL	0
508	CAV 6	siCTRL	0
509	CAV 6	siCTRL	0
510	CAV 6	siCTRL	0
511	CAV 6	siCTRL	0
512	CAV 6	siCTRL	0
513	CAV 6	siCTRL	0
514	CAV 6	siCTRL	0
515	CAV 6	siCTRL	0
516	CAV 6	siCTRL	0
517	CAV 6	siCTRL	0
518	CAV 6	siCTRL	0
519	CAV 6	siCTRL	0
520	CAV 6	siCTRL	0
521	CAV 6	siCTRL	0
522	CAV 6	siCTRL	0
523	CAV 6	siCTRL	0
524	CAV 6	siCTRL	0
525	CAV 6	siCTRL	0
526	CAV 6	siCTRL	0
527	CAV 6	siCTRL	0
528	CAV 6	siCTRL	0
529	CAV 6	siCTRL	0
530	CAV 6	siCTRL	0
531	CAV 6	siCTRL	0
532	CAV 6	siCTRL	0
533	CAV 6	siCTRL	0
534	CAV 6	siCTRL	0
535	CAV 6	siCTRL	0
536	CAV 6	siCTRL	0
537	CAV 6	siCTRL	0
538	CAV 6	siCTRL	0
539	CAV 6	siCTRL	0
540	CAV 6	siCTRL	0
541	CAV 6	siCTRL	0
542	CAV 6	siCTRL	0
543	CAV 6	siCTRL	0
544	CAV 6	siCTRL	0
545	CAV 6	siCTRL	0
546	CAV 6	siCTRL	0
547	CAV 6	siCTRL	0
548	CAV 6	siCTRL	1
549	CAV 6	siCTRL	1
550	CAV 6	siCTRL	1
551	CAV 6	siCTRL	1
552	CAV 6	siCTRL	1
553	CAV 6	siCTRL	1
554	CAV 6	siCTRL	1
555	CAV 6	siCTRL	1
556	CAV 6	siCTRL	1
557	CAV 6	siCTRL	1
558	CAV 6	siCTRL	1
559	CAV 6	siCTRL	1
560	CAV 6	siCTRL	1
561	CAV 6	siCTRL	1
562	CAV 6	siCTRL	1
563	CAV 6	siCTRL	1
564	CAV 6	siCTRL	1
565	CAV 6	siCTRL	1
566	CAV 6	siCTRL	1
567	CAV 6	siCTRL	1
568	CAV 6	siCTRL	1
569	CAV 6	siCTRL	1
570	CAV 6	siCTRL	1
571	CAV 6	siCTRL	1
572	CAV 6	siCTRL	1
573	CAV 6	siCTRL	1
574	CAV 6	siCTRL	1
575	CAV 6	siCTRL	1
576	CAV 6	siCTRL	1
577	CAV 6	siCTRL	1
578	CAV 6	siCTRL	1
579	CAV 6	siCTRL	1
580	CAV 6	siCTRL	1
581	CAV 6	siCTRL	1
582	CAV 6	siCTRL	1
583	CAV 6	siCTRL	1
584	CAV 6	siCTRL	1
585	CAV 6	siCTRL	1
586	CAV 6	siCTRL	1
587	CAV 6	siCTRL	1
588	CAV 6	siCTRL	1
589	CAV 6	siCTRL	1
590	CAV 6	siCTRL	1
591	CAV 6	siCTRL	1
592	CAV 6	siCTRL	1
593	CAV 6	siCTRL	1
594	CAV 6	siCTRL	1
595	CAV 6	siCTRL	1
596	CAV 6	siCTRL	1
597	CAV 6	siCTRL	1
598	CAV 6	siCTRL	1
599	CAV 6	siCTRL	1
[truncated: 2,201 more rows]
