# Supplementary material for: Caveolin-1 protects endothelial cells from extensive expansion of transcellular tunnel by stiffening the plasma membrane
Source: eLife. 2024 Mar 22;12:RP92078. doi: 10.7554/eLife.92078 (PMC10959525; doi:10.7554/eLife.92078)
Supplement: Figure 2—source data 1. [file elife-92078-fig2-data1.xlsx]

## Sheet: Figure 2B
siCRTL-	siCRTL-	siCRTL-	siCRTL-	siCRTL-	siCRTL-	siCRTL-	siCRTL-	siCRTL+	siCRTL+	siCRTL+	siCRTL+	siCRTL+	siCRTL+	siCRTL+	siCRTL+	siCAV1-	siCAV1-	siCAV1-	siCAV1-	siCAV1-	siCAV1-	siCAV1-	siCAV1-	siCAV1 +	siCAV1 +	siCAV1 +	siCAV1 +	siCAV1 +	siCAV1 +	siCAV1 +	siCAV1 +	siPTRF-	siPTRF-	siPTRF-	siPTRF-	siPTRF-	siPTRF-	siPTRF-	siPTRF-	siPTRF+	siPTRF+	siPTRF+	siPTRF+	siPTRF+	siPTRF+	siPTRF+	siPTRF+
0.2224	0.0476	0.0056	0.4292	0.698	0.01	0.0124	0.004	0.0088	0.9264	0.0876	0.0028	15.8964	0.002	0.1632	0.002	0.142	0.0268	2.3344	0.0436	0.0116	0.0072	0.0332	0.0056	0.008	0.124	0.16	2.8132	0.00804	83.342	0.2916	0.0096	0.1392	0.0036	0.0028	0.0012	0.0088	0.1572	0.0064	0.0004	2.7536	0.0176	2.2532	72.4828	57.1676	24.9184	18.2788	0.466
0.072	0.0956	0.0248	0.0572	0.0072	0.0152	0.0068	0.0004	0.0152	0.0068	0.0028	0.0952	13.2156	0.0104	1.1272	0.0196	0.0548	0.0076	0.1544	0.0748	0.0592	0.0352	0.0096	0.0008	0.1624	0.2904	0.3216	0.008	0.1624	0.046	0.5192	7.8116	0.0196	0.0568	0.9152	0.0012	0.002	0.0952	0.0144	0.0184	0.0228	0.046	2.1244	10.9008	0.0052	0.4172	0.0112	0.036
0.0368	0.0128	0.004	0.0184	0.3356	0.0108	0.0708	0.0004	1.4624	0.0028	0.1972	0.0548	0.638	0.0008	0.0036	0.0108	0.3704	0.0288	0.4048	0.0268	0.1276	0.0176	0.01	0.0128	1.4484	0.0196	0.038	11.0032	0.004	0.0136	0.0044	0.0012	0.0024	0.07	0.112	0.006	0.0096	0.0032	0.0044	0.012	5.7524	0.002	0.0008	0.3192	0.0096	0.0204	0.0728	0.1932
0.0012	0.014	0.0092	0.0248	0.3432	0.0012	0.0256	0.0736	0.0168	0.0728	0.7484	0.0004	1.9136	0.0004	0.08	0.0128	0.0072	0.0268	0.0484	0.0028	0.9984	0.0064	0.0188	0.0012	0.0004	1.3696	0.1352	0.0012	0.0004	0.0904	0.0212	0.0312	0.0092	0.0016	0.0004	0.0168	0.0208	0.0144	0.012	0.0128	0.0036	0.0028	0.0608	0.0016	3.2932	0.0072	5.1836	0.2148
0.0028	0.0112	0.0292	0.0124	0.8368	0.0004	0.0152	0.0212	0.0032	0.0096	0.3652	0.6556	0.05	0.0004	0.058	0.0096	0.0148	0.0088	0.3748	0.0296	0.0224	0.5048	0.012	0.0104	0.02	0.0104	0.04	1.9692	0.0288	5.7316	0.0748	0.1612	0.0092	0.0052	0.0364	0.0112	0.004	0.0464	0.0016	0.0152	0.5644	0.0052	0.1796	45.242	0.1944	0.0064	0.006	0.1132
0.0012	0.0124	0.0124	0.0028	1.712	0.0008	0.0176	0.0404	0.0064	0.0784	1.9548	40.9656	0.0264	0.0004	0.0844	0.0372	0.0624	0.0024	0.0004	0.0008	0.262	0.0052	0.0152	0.0016	0.0428	0.2436	0.3196	0.1128	0.0428	0.0008	0.0144	1.2192	0.0044	0.0668	0.0128	0.0064	0.028	0.004	0.0436	0.0364	0.9084	2.9416	0.0184	0.0004	0.1572	0.0068	0.2692	0.0132
0.0052	0.0136	0.0124	0.0048	0.0084	0.0128	0.0228	0.194	0.012	2.3984	0.0104	0.0108	0.0104	0.0004	0.0208	0.0016	0.0204	0.0032	0.0152	0.0396	0.0008	0.0012	0.0004	0.014	0.0052	0.0024	0.0312	42.7764	0.0052	0.006	0.0636	0.0328	0.3512	0.0108	0.0408	0.0004	0.0128	0.0016	0.0028	0.0056	0.0004	0.254	0.0048	0.0272	0.8076	0.0208	0.0304	0.002
0.0124	0.0204	0.038	0.01	0.0092	0.0032	0.018	0.0096	0.0536	0.02	0.102	0.1952	0.0004	0.0416	0.038	0.0132	0.0268	0.5284	0.386	0.002	0.2756	0.0144	0.0004	0.0744	4.3932	0.384	0.4812	0.1468	4.3932	0.9188	0.1796	9.02	0.0304	0.0684	0.0332	0.0152	0.0444	0.056	0.016	0.0304	0.114	0.1012	0.0468	0.0152	0.022	0.07	0.0056	0.0004
0.0208	0.0028	0.036	0.0052	0.2348	0.0084	0.0116	0.0016	0.0004	0.0348	0.01	0.0064	0.0864	1.7468	0.236	0.0108	0.0068	0.0356	0.0412	0.0404	0.698	0.006	0.0004	0.0012	0.0004	0.002	0.002	4.7088	0.0004	0.0444	0.008	0.1356	0.0036	0.012	0.0104	0.0092	0.0076	0.0216	0.0136	0.0124	0.0516	0.046	0.0052	0.0004	0.1088	0.1212	0.0144	1.0104
0.0016	0.0008	0.0128	0.0036	0.0928	0.018	0.0124	0.0168	0.002	0.0204	0.0008	0.0192	0.0008	0.0424	0.0364	0.3424	0.016	0.3288	0.008	0.0096	0.0544	0.016	0.0188	0.0004	0.0188	1.5628	0.0012	13.1268	0.0188	0.0088	0.0064	0.0004	0.0008	0.104	0.2384	0.0344	0.056	0.0068	0.0284	0.0192	0.004	0.1204	0.0524	0.282	0.0192	0.0028	0.0452	0.0132
0.096	0.0032	0.0124	0.0304	0.0736	0.9952	0.0012	0.0208	3.6032	0.0124	0.2036	0.0668	0.6016	0.0124	0.0068	0.004	0.0192	0.01	0.022	0.0012	0.1048	0.0308	0.0124	0.0256	0.0012	0.0004	0.1212	0.1904	0.0012	0.0168	0.0076	0.004	0.0064	0.0248	0.0004	0.0116	0.0084	0.05	0.0104	0.0148	0.6016	0.0136	0.008	0.0176	2.8188	0.0536	0.0176	0.2476
0.028	0.0116	0.0156	0.1284	0.0004	0.0892	0.0176	0.0136	0.1196	0.0132	0.0028	0.0096	0.5052	0.0144	0.0168	0.0144	0.0056	0.24	0.0024	0.0064	0.094	0.0012	0.2156	0.0048	0.0076	0.0008	0.288	0.0004	0.0076	0.0008	0.0032	23.3808	1.3864	0.0188	0.0072	0.0276	0.032	0.0508	0.0132	0.0132	0.0276	0.002	0.0316	0.0132	0.0004	0.0344	0.0468	0.0036
0.0068	0.0048	0.002	0.0512	0.0672	0.0104	0.0336	0.0412	0.0008	0.0008	2.9456	0.0104	0.0084	0.558	0.0056	0.0164	0.0396	0.0032	0.1136	0.0108	0.014	0.1172	0.0068	0.0044	0.0244	0.0008	0.0308	0.0096	0.0244	0.0004	0.0164	0.0068	0.0008	0.002	0.004	0.0316	0.01	0.05	0.0336	0.0136	0.0636	0.1056	1.6108	0.6104	35.126	0.4	0.0004	0.0224
0.0068	0.01	0.0064	0.0216	0.2888	0.0004	0.036	0.0236	0.0216	0.002	0.0204	0.0212	0.0436	0.0004	0.0168	0.004	0.0052	0.022	0.0108	0.1136	2.17	0.0524	0.0172	0.004	0.0096	0.078	0.4244	0.0388	0.0096	0.01	0.0404	0.0124	0.0064	0.3476	0.0604	0.0096	0.0164	0.1836	0.024	0.0156	1.844	0.0016	0.0188	0.006	0.0396	0.5708	0.0236	0.5408
0.0128	0.2788	0.0428	0.0212	0.0228	0.0032	0.0032	0.0148	0.0388	0.3492	0.0004	0.0096	0.0388	0.0004	0.0564	0.0244	0.0064	0.0188	0.016	0.0032	0.0184	0.0088	0.2308	0.002	1.0656	0.0008	0.0432	2.678	0.004	1.2348	0.7092	0.0044	0.3344	0.0428	0.0388	0.012	0.0048	0.0108	0.004	0.0136	1.7712	1.186	0.28	0.0004	1.0932	0.0168	0.0556	0.0048
0.1456	0.05	0.0144	0.0092	0.0016	0.0416	0.0708	0.0156	0.23	0.0592	0.1176	0.0048	0.0148	1.6608	0.0888	0.0052	0.004	0.0292	0.034	0.0368	0.0264	0.0056	0.0148	0.0044	0.1916	0.0008	5.5288	0.6396	0.1916	0.0008	0.0124	0.0024	1.2032	0.006	0.018	0.002	0.0888	0.0024	0.0048	0.01	0.0624	0.2472	0.7176	0.0264	0.0256	1.5816	0.0124	0.2092
0.0164	0.0008	0.0132	0.002	0.0056	0.06	0.002	0.0004	0.1136	0.69	0.0596	0.0348	0.4536	0.0004	0.0268	0.0236	0.0344	0.026	0.0032	0.0152	0.1664	0.0196	0.0056	0.0448	0.0004	0.0028	0.8684	0.0004	0.316	0.0092	12.9216	0.0292	0.0072	0.0324	0.0844	0.1604	0.0512	0.3436	0.0024	0.0092	0.0004	0.0036	0.0044	0.0004	0.0088	0.064	0.0176	0.0952
0.0024	0.0032	0.058	0.0624	0.0652	0.01	0.022	0.0136	0.0092	0.002	0.0116	0.016	0.1428	0.0004	0.0264	0.0236	0.0544	0.0024	0.038	0.0248	0.334	0.0068	0.0004	0.0248	0.0004	0.0004	2.3104	0.1112	0.0004	0.026	0.5108	0.0104	0.028	0.0036	0.0112	0.0044	0.024	0.0044	0.0104	0.014	0.0244	0.0128	1.1256	0.0004	0.0036	0.008	0.016	6.5496
0.0268	0.044	0.0572	0.0168	0.0312	0.0056	0.0204	0.0148	0.484	0.0888	0.0036	0.8896	0.1436	0.0004	0.0352	0.0108	0.0448	0.0076	0.0004	0.2232	0.014	0.0132	0.0084	0.0148	0.5336	0.1132	0.0052	0.0172	0.5336	0.0016	0.0368	0.0344	0.244	0.0128	1.8632	0.0092	0.014	0.0508	0.0936	0.0128	0.2588	0.0472	0.0024	0.0056	0.3492	0.0248	0.092	0.0004
0.002	0.06	0.2484	0.0012	0.014	0.0504	0.1704	0.0024	0.0696	0.23	0.0088	0.0028	0.0028	0.0004	0.0128	0.0224	0.7608	0.04	0.0456	0.0392	0.0116	0.0208	0.0876	0.002	0.118	0.0524	0.0304	0.0008	0.1182	0.6072	0.0068	0.0012	0.0784	0.0104	0.1488	0.018	0.0216	0.0112	0.0144	0.0152	0.0056	0.114	0.0056	0.0004	0.0216	0.0008	0.2416	0.114
0.048	0.0072	0.0156	0.0128	0.0012	0.044	0.0128	0.0128	0.0048	0.072	0.0444	0.0172	0.018	0.0004	0.0608	0.0356	0.0168	0.0196	0.0116	0.0232	0.004	0.0544	0.0404	0.0004	0.0196	0.188	0.5392	0.0852	0.0196	0.0224	0.0024	0.0312	0.2948	0.018	1.1596	0.0084	0.0132	0.0084	0.0052	0.0112	0.1468	0.6168	0.0244	0.05	0.0004	0.0048	0.0096	0.0296
0.0048	0.1096	0.018	0.006	0.0256	0.0004	0.0124	0.01	0.0288	0.404	0.0148	0.0124	0.046	0.0016	0.0332	0.0284	0.066	0.012	0.0036	0.0308	0.0628	0.0116	0.056	0.0404	0.0348	0.0676	3.902	0.0092	0.006	0.0136	0.0272	0.0104	0.0156	0.0096	0.0024	0.0032	0.0532	0.0696	0.0024	0.02	0.0232	0.0012	0.2024	0.0084	0.0068	0.858	0.5172	0.016
0.01	0.0004	0.0048	0.0616	0.2204	0.0196	0.0156	0.01	0.076	0.018	0.0056	0.01	0.0116	0.2656	0.0196	0.0064	0.002	0.0496	0.0404	0.0044	0.2808	0.5612	0.0212	0.0096	0.066	0.0088	0.0152	0.0488	0.0666	0.084	0.0056	0.5212	0.0004	0.8808	0.062	0.032	0.01	0.0052	0.0124	0.0112	1.244	0.5372	0.0228	0.2032	0.0036	0.2656	0.0052	0.462
0.1708	0.0056	0.1168	0.0084	0.004	0.0448	0.0116	0.0076	0.054	0.2952	0.2848	0.028	0.0512	0.0004	0.0124	0.0164	0.4848	0.0076	1.5156	0.0276	0.0016	0.0144	0.0124	0.0044	0.0072	0.0168	0.0048	0.0004	0.0072	0.006	0.0024	3.4516	0.068	0.002	0.0248	0.0128	0.014	0.0008	0.0556	0.0132	0.3652	0.1452	0.0056	1.6492	0.336	0.3336	0.0036	0.0172
0.0088	0.0428	0.0108	0.0196	0.0284	0.0216	0.0116	0.012	0.186	0.0112	0.0048	0.0232	0.01	0.0004	0.0108	0.0112	0.2212	0.0064	0.0008	0.0112	0.0556	0.0144	0.178	0.0176	19.5652	0.0236	1.2272	0.0004	0.1052	0.0148	0.0028	0.006	0.5308	0.0016	0.0044	0.0048	0.0356	0.0376	0.0372	0.0164	3.8872	0.172	0.018	0.0188	0.0032	0.052	0.0516	0.0208
0.0196	0.0004	0.0668	0.0112	0.0008	0.006	0.0164	0.0128	0.012	0.194	1.284	0.0364	2.0724	0.0032	0.0032	0.358	0.0024	0.0168	0.0088	0.0088	0.0276	0.0032	0.006	0.0396	2.9072	0.0268	0.9052	0.0892	0.044	0.0836	0.0192	0.0224	0.0292	0.002	0.0204	0.0084	0.0108	0.0144	0.0368	0.0124	0.2372	0.0004	0.7728	0.0072	0.006	0.0496	0.0192	0.0984
0.0712	0.0064	0.0068	0.0224	0.012	0.0068	0.2572	0.012	0.242	0.08	0.356	0.0636	0.098	0.0004	0.074	0.0084	0.1676	0.0008	0.0432	0.072	0.4352	0.0144	0.0104	0.0004	0.0004	0.1988	0.01	0.0084	0.0004	0.0088	0.0032	0.0044	0.068	0.0776	0.0032	0.1136	0.01	0.1124	0.0192	0.0144	0.0012	0.004	0.8548	0.002	0.112	0.0008	0.0168	0.0364
0.176	0.1352	0.0228	0.0108	0.0856	0.0388	0.0116	0.0228	0.0064	0.0028	0.0136	0.0056	0.056	0.0008	0.0068	0.1184	0.0044	0.0076	0.0272	0.0076	0.0084	0.0568	0.0368	0.0184	0.1576	0.002	0.2732	0.0048	0.1576	0.0228	0.02	0.0024	0.0012	0.6844	0.0452	0.0144	0.0032	0.0284	0.0136	0.0116	0.0084	0.0484	0.012	3.7064	0.0008	0.018	3.22	0.0744
0.0188	0.7464	0.012	0.0236	0.0832	0.0152	0.0128	0.0004	0.004	0.0052	0.09	0.0096	0.004	0.0004	0.2836	0.0152	0.01	0.1196	0.0112	0.006	0.0412	0.0124	0.0132	0.0116	0.0664	0.0012	0.0052	0.026	0.0664	0.0064	0.0228	0.0068	0.0096	1.7388	0.01	0.0136	0.0356	0.0428	0.0144	0.012	0.0016	0.0188	0.0384	0.0024	0.0008	0.0964	0.0304	0.0216
0.0216	0.0704	0.074	0.0632	0.0192	0.0184	0.0148	0.022	0.0056	0.1292	0.0008	0.0136	0.0008	0.0004	0.0168	0.01	0.0092	0.2028	0.0728	0.0024	1.3056	0.0404	0.012	0.0404	0.0384	0.0104	0.1184	0.252	0.002	1.0032	0.0272	0.012	0.0192	0.158	0.0068	0.016	0.0924	0.0224	0.0144	0.0168	0.03	0.0132	0.4988	0.1236	0.0156	0.9684	0.0688	0.0832
0.0024	0.0276	0.018	0.0016	0.2344	0.006	0.1392	0.018	0.6572	0.0004	0.0012	0.0016	0.008	0.0044	0.014	0.0336	0.5696	0.026	0.0068	0.0196	0.1184	0.0004	0.0204	0.0296	0.8312	0.3396	1.4192	0.0592	0.8312	0.0108	0.088	0.0052	0.0156	0.0176	0.0088	0.0024	0.0164	0.0032	0.0124	0.0204	0.0956	0.0492	0.028	0.0692	0.0024	0.1308	0.3616	0.0592
0.0048	0.0092	0.1552	0.0044	0.0028	0.4368	0.1172	0.01	0.0004	0.104	0.0108	0.0004	0.0052	0.008	0.0052	0.0088	0.0268	0.0772	0.0392	0.108	0.0124	0.0004	0.01	0.0012	0.0076	0.0092	0.0008	0.0316	0.0076	0.0364	0.0152	0.0236	0.004	0.0116	6.1032	0.0268	0.0004	0.008	0.0092	0.0152	0.026	0.0064	0.0036	0.1048	0.6628	1.0164	0.0216	0.024
0.0468	0.04	0.0132	0.014	0.0216	0.0056	0.392	0.0144	0.0012	1.5712	0.0172	0.0216	0.0052	0.0028	0.014	0.0024	0.7156	0.0124	0.0208	0.0076	0.0272	0.0768	0.0152	0.004	0.0084	0.0144	0.0052	0.0556	0.0084	0.002	0.0056	0.2424	0.1304	0.046	0.0764	0.0128	0.0068	0.0844	0.0116	0.0144	0.2892	0.0536	0.0184	0.0092	1.8152	0.0024	4.362	0.0144
0.3	0.0604	0.0444	0.014	0.4956	0.0116	0.0064	0.01	0.0112	0.1808	0.0184	0.024	0.0056	0.0252	0.0124	0.0104	0.1056	0.078	0.0088	0.0044	0.0224	0.0004	0.004	0.0072	0.0076	3.4876	0.1424	0.008	0.128	4.9	0.1116	0.0132	0.0004	0.1356	0.0096	0.0152	0.0292	0.0852	0.0128	0.01	0.0004	0.0092	0.0512	0.0032	0.426	0.4492	0.0224	0.0016
0.126	0.1152	0.0044	0.0144	0.5132	0.0088	0.0124	0.01	0.0136	0.0004	0.0436	0.0124	0.0256	0.0712	0.0052	0.0132	0.0976	0.0388	0.0408	0.0184	0.0016	0.0128	0.0188	0.052	0.0244	0.1256	1.2224	1.3484	0.0244	0.0248	0.0256	0.1028	0.0116	0.5272	0.0068	0.0004	0.0908	0.0484	0.024	0.0128	0.0268	0.6228	0.0048	0.0032	0.2444	0.168	3.936	0.008
0.5156	0.0516	0.0124	0.0348	0.2152	0.12	0.0128	0.0484	0.2164	0.5832	0.0404	0.2708	0.0508	8.2524	0.018	0.0168	0.064	0.0048	0.0048	0.0096	0.0044	0.0576	0.0284	0.0128	0.002	0.0288	0.0224	0.75	0.002	0.0052	0.0052	0.0424	0.1888	0.006	0.006	0.0064	0.0092	0.0116	0.0132	0.01	0.1016	0.0684	0.0204	0.0964	0.1356	0.0008	0.002	0.054
0.0116	0.032	0.0064	0.0264	0.2688	0.0504	0.0056	0.0468	0.34	0.0972	0.0008	0.0044	0.004	0.0008	0.076	0.0016	0.0092	0.0056	0.9216	0.0172	0.0316	0.0116	0.0152	0.0896	0.0216	0.0608	0.1368	0.0464	0.02	0.0556	0.0012	0.0132	0.0108	0.006	0.0016	0.0076	0.0364	0.0016	0.0496	0.018	0.006	0.1248	0.8604	0.0192	0.0128	0.082	0.0064	0.0112
0.0028	0.0096	0.0132	0.0168	0.0128	0.0048	0.0088	0.0892	0.0076	0.4528	0.0064	0.0592	0.0012	0.4448	0.3	0.0112	0.1108	0.104	0.1236	0.0412	0.0032	0.0132	0.2464	0.0772	0.004	0.0612	0.0664	0.0004	0.0042	2.914	2.1228	0.0068	0.0176	0.0004	0.0148	0.0168	0.0168	0.0152	0.0336	0.0348	0.1208	0.0032	0.1856	0.0328	0.0784	0.026	29.5656	0.0584
0.1016	0.0912	0.0068	0.0192	0.0168	0.0096	0.018	0.0552	0.1044	0.1176	0.5248	0.0928	0.0696	0.0052	2.6752	0.0004	0.0492	0.0184	0.0244	0.134	0.0296	0.016	0.0344	0.0148	0.0072	0.8628	0.054	0.0004	0.0072	0.5228	0.0608	0.0792	0.0056	0.0084	0.0128	0.0556	0.0136	0.0096	0.0128	0.0024	0.0088	0.0052	4.8424	0.1092	0.052	1.3216	0.0356	0.0084
0.0092	0.0312	0.0024	0.048	0.0016	0.0104	0.0524	0.0096	1.6064	0.0832	0.0216	0.0136	0.0136	0.0032	0.0708	0.018	1.2212	0.0128	0.0152	0.0416	0.0076	0.0184	0.002	0.0224	0.0088	0.0448	0.2204	0.0132	0.0088	0.0104	0.0112	0.0104	0.0032	0.0172	0.0156	0.0308	0.0016	0.0328	0.012	0.0284	0.0016	0.0148	0.0412	0.0028	0.1004	0.034	0.0148	0.0216
0.0016	0.3372	0.024	0.0128	0.0288	0.0324	0.0364	0.0176	0.0412	0.0612	0.4296	0.002	0.0108	0.0652	0.0008	0.0252	0.0032	0.0916	0.0212	0.0328	0.1944	0.0008	0.004	0.0116	0.004	0.0048	0.0204	0.0012	0.004	0.0016	0.1928	0.0116	0.0108	0.0208	0.0264	0.0004	0.008	0.044	0.048	0.0148	0.0784	0.0336	0.0036	0.0032	0.0276	0.0552	0.0124	0.002
0.0004	0.0008	0.0324	0.0136	0.6452	0.0376	0.0116	0.014	0.01	0.0316	0.1444	0.002	0.0048	0.2764	7.8524	0.0312	0.3252	0.0132	0.1784	0.0096	0.0064	0.0332	0.0088	0.0028	0.0008	0.0288	0.0196	0.018	0.0008	0.0516	0.0092	0.0052	0.0072	0.0092	0.006	0.01	0.0672	0.032	0.008	0.024	0.0076	0.0148	0.048	0.1356	0.01	0.0028	0.0032	0.0004
0.0208	0.0092	0.0068	0.0292	3.1792	0.0996	0.0196	0.0324	0.0008	0.02	0.0012	0.006	0.0004	0.0012	0.0004	0.0188	0.0008	0.026	0.1356	0.016	0.0316	0.0144	0.012	0.0188	0.0304	0.0052	0.0024	0.0364	0.0304	0.0084	0.004	0.3828	0.0148	0.052	0.0396	0.0288	0.1812	0.1052	0.0252	0.058	0.0124	0.0628	0.1284	0.0952	0.0152	0.0592	0.21	0.0012
0.0348	0.0012	0.0252	0.02	0.0012	0.026	0.0272	0.0976	0.0192	0.1712	0.0004	0.0184	0.0016	0.0284	0.8036	0.004	0.0428	0.0116	0.006	0.2288	0.0228	0.0308	0.0004	0.2596	0.0044	0.0312	0.0372	0.0276	0.0044	0.0648	0.14	24.776	0.0136	0.0172	0.0132	0.052	0.0144	0.0024	0.0064	0.0012	0.3068	0.0016	0.062	0.0156	0.0376	0.014	0.024	0.0236
0.0024	0.186	0.0044	0.0652	0.0244	0.0348	0.0136	0.014	0.01	0.0144	0.2308	0.0108	0.0544	0.4724	0.3988	0.0148	0.02	0.9412	0.0036	0.02	0.0004	0.0004	0.01	0.0352	7.6296	0.0004	1.3236	0.042	7.6296	1.4296	0.0232	0.01	0.008	0.0068	0.0112	0.0064	0.0004	0.0336	0.0168	0.0232	0.004	0.0072	0.048	2.1672	0.0144	0.014	0.0052	0.0036
0.7008	0.0468	0.024	0.0072	0.0712	0.0332	0.0088	0.0264	0.0316	5.7816	0.0104	1.0232	0.0152	0.0136	0.0628	0.0044	0.0072	0.1908	0.0008	0.0128	0.0848	0.0064	0.0852	0.0272	0.6132	18.4728	0.0416	0.0024	0.6132	0.4704	1.394	0.05	0.0072	0.0144	0.01	0.0144	0.022	0.0116	0.0096	0.0128	0.0108	0.002	0.1092	0.0804	0.1256	0.0796	0.0012	0.6764
0.1288	0.0264	0.0128	0.0204	0.0704	0.0056	0.0176	0.0152	0.0072	0.0556	0.2072	0.0348	0.0192	0.038	0.06	0.0132	0.0028	0.0028	0.0212	0.0048	0.0064	0.002	0.0016	0.0008	0.0004	0.036	0.0476	0.0136	0.0004	0.0516	0.0012	0.1012	0.0096	0.0012	0.0032	0.0088	0.0564	0.0652	0.0144	0.01	0.012	0.0424	0.016	0.1044	0.0064	0.0052	0.0428	0.0124
0.0104	0.0812	0.0136	0.0204	0.0716	0.0208	0.0124	0.02	0.0112	0.0024	0.0016	0.0028	0.0016	1.9412	0.0104	0.4316	0.0604	0.0156	0.0588	0.0636	0.0044	0.0072	0.0112	0.0024	0.0088	0.06	0.0924	0.0048	0.0088	0.0008	0.0112	0.1304	0.0176	0.0148	0.0012	0.2776	0.0128	0.0364	0.0132	0.0124	0.0092	0.246	0.002	0.1196	0.2536	0.162	0.026	0.0136
0.0204	0.0076	0.0108	0.0156	0.0308	0.0188	0.0404	0.0244	0.0348	0.0016	0.0148	0.0016	0.0204	0.7508	0.0308	0.006	0.0364	0.0504	0.028	0.0872	0.118	0.01	0.0156	0.038	0.0008	0.034	0.1076	0.0012	0.0008	0.018	0.0036	1.0476	0.0116	0.0008	0.0036	0.0328	0.0132	0.0256	0.0128	0.016	0.0024	0.1628	0.0656	0.0164	0.0032	0.0044	0.0696	0.0028
0.0564	0.0052	0.0384	0.0064	0.0112	0.1056	0.0192	0.0232	0.0108	0.0248	0.0628	0.9332	0.0084	0.152	0.1128	0.0212	0.05	0.02	0.0828	0.0088	0.114	0.0092	0.014	0.0124	1.5108	0.0004	0.0012	0.0048	1.5108	0.0256	0.01	0.0208	0.0144	0.01	0.03	0.016	0.0108	0.0772	0.3184	0.0156	4.028	0.0196	0.0072	0.0076	0.2128	0.6296	0.0688	0.0044
0.0064	0.0132	0.0056	0.01	0.0308	0.0084	0.014	0.202	0.0008	0.0392	0.214	0.008	0.0108	0.008	0.0048	0.0364	0.0244	0.0068	0.0036	0.0028	0.2216	0.0116	0.01	0.032	0.0716	0.0072	0.0012	0.0012	0.0716	0.618	0.1216	0.014	0.0164	0.0092	0.0096	0.0264	0.0004	0.0208	0.0152	0.1324	0.0104	1.2716	0.1152	0.0148	0.0044	0.0224	0.0088	0.2416
0.0004	0.0108	0.0084	0.0136	0.0188	0.0096	0.0156	0.0176	0.0788	0.226	0.0108	0.016	0.0028	1.804	0.45	0.0188	0.0112	0.0504	0.0028	0.0008	0.0792	0.2784	0.0352	0.0148	0.0012	0.0032	0.0492	1.9976	0.0012	0.0064	0.068	0.0176	0.0012	0.0076	0.0284	0.0328	0.0144	0.1164	0.0152	0.048	0.0292	1.3848	0.0096	0.0588	0.0096	0.0572	0.04	0.0088
0.0068	0.1524	0.016	0.0148	0.0236	0.0088	0.0176	0.0472	0.03	0.13	0.0268	0.1076	0.0656	0.0316	0.0316	0.0004	0.0644	0.0052	0.0112	0.0104	0.1712	0.0024	0.01	0.0372	0.0148	1.0116	0.2356	0.0684	0.002	0.0876	0.0084	0.0152	0.0244	0.0184	0.012	0.0148	0.006	0.0084	0.0376	0.0408	0.0024	0.0444	0.0512	0.0028	0.0008	0.0112	3.0288	0.0956
0.084	0.0436	0.0012	0.0016	0.0132	0.0032	0.0272	0.0152	0.0028	2.4168	0.5872	0.0252	0.0092	0.084	0.0436	0.0528	0.0072	0.0368	0.0384	0.0236	0.0008	0.0132	0.0124	0.0052	0.0252	0.0012	0.0004	0.0076	0.0252	0.0936	0.0016	0.286	0.0024	0.006	0.0104	0.0232	0.0304	0.0368	0.1544	0.01	1.3888	0.0688	0.1332	0.004	0.0548	0.0328	0.0052	0.0016
0.0344	0.026	0.0196	0.0152	0.0408	0.0108	0.0344	0.0188	0.0348	0.0016	0.0184	0.0372	0.0404	2.474	0.0052	0.014	0.0108	0.0012	0.1192	0.0028	0.026	0.0372	0.012	1.126	0.0036	0.0552	0.1044	0.0392	0.0036	0.0064	0.0744	0.0052	0.0304	0.2072	0.0096	0.0084	0.0136	0.0544	0.0132	0.0264	2.1396	0.0032	0.1756	0.0788	0.1244	0.2888	0.0324	0.0216
0.1172	0.004	0.016	0.0076	0.004	0.0336	0.0164	0.014	0.1028	0.0552	0.0124	0.0212	0.0088	0.006	0.1988	0.0132	0.0148	0.0264	0.0132	0.0128	0.3032	0.0144	0.0264	0.6868	0.0032	0.0224	0.0276	0.0448	0.0032	1.3944	0.0004	0.1044	0.0176	0.0168	0.0188	0.0492	0.0632	0.0208	0.0152	0.0128	0.04	0.0584	0.0388	0.0204	0.0132	0.7808	0.0148	0.0016
0.0032	0.0124	0.01	0.0012	0.0224	0.8992	0.1096	0.0156	0.028	0.8976	0.0008	0.008	1.3756	0.0056	0.0788	0.014	0.02	0.0004	0.0208	0.1088	0.1112	0.0176	0.0156	0.022	0.0452	4.5268	0.04	4.2872	0.0452	0.0584	0.016	0.0448	0.028	0.0128	0.0044	0.0024	0.0128	0.0004	0.0132	0.022	0.0052	0.2616	0.0004	0.0048	0.0244	0.4192	0.0136	0.016
1.2372	0.006	0.0076	0.0428	0.1124	0.0132	0.0136	0.014	1.0488	0.0004	0.0248	0.0044	0.1504	0.0004	0.0076	0.01	0.0016	0.0096	0.0008	0.0144	0.0236	0.014	0.0268	3.9392	0.9492	0.0004	0.1184	0.002	0.074	0.0044	0.0872	0.0004	0.0348	0.0648	0.0084	0.0128	0.0596	0.1336	0.0248	0.0172	0.0344	0.0084	0.0208	0.0244	0.192	0.116	0.002	0.0008
0.0628	0.01	0.004	0.0224	0.0176	0.0104	0.0276	0.0124	0.0016	0.0452	0.0028	0.0752	0.0008	0.0048	0.0304	0.0152	0.0056	0.0128	0.0308	0.2556	0.3952	0.0164	0.0128	0.2116	0.1736	0.0936	0.0164	0.0112	0.1736	0.0788	0.0824	0.0256	0.0552	0.0152	0.0036	0.016	0.0352	0.0036	0.0268	0.0132	9.6848	0.0444	0.0476	0.0264	0.0208	0.0064	0.7696	0.0864
0.0412	0.0012	0.1792	0.0116	0.0136	0.4212	0.0184	0.014	0.0764	0.098	0.0136	0.0004	0.01	0.0128	1.1832	0.0132	1.1864	0.002	0.0044	0.3504	0.0004	0.0192	0.0248	0.034	0.0496	0.0004	0.06	0.0096	0.0496	0.0092	0.2756	0.0004	0.0272	0.006	0.0092	0.2252	0.0032	0.0504	0.0128	0.012	0.0004	0.014	0.0112	0.0016	0.0032	0.404	0.0064	0.0372
0.0016	0.016	0.0128	0.0312	0.0124	0.0036	0.0128	0.0128	0.0216	0.05	0.0884	0.5912	0.0012	0.0004	0.0132	0.012	0.094	0.0104	0.0224	0.0312	0.0784	0.0428	0.0104	0.064	0.0004	0.0432	0.072	0.0048	0.0004	0.0108	5.1324	0.0104	0.0164	0.0068	0.0136	0.0096	0.0052	0.0064	0.0132	0.0152	0.0184	0.0156	0.0576	0.064	0.0072	0.3752	0.1768	0.0004
0.0028	0.0208	0.0112	0.0148	0.0068	0.0028	0.0176	0.0156	0.588	0.0004	0.0128	0.0516	0.0828	0.0388	0.0196	0.0072	0.0004	0.0124	0.0416	0.0296	0.0052	0.008	0.0128	0.0076	0.004	0.0024	0.3348	0.0008	0.004	0.0216	0.0104	0.0072	0.006	0.0036	0.866	0.004	0.0092	0.0068	0.006	0.0584	2.1136	0.0128	0.032	0.0128	0.008	0.0232	0.0144	0.0116
0.0116	0.008	0.0028	0.044	0.0012	0.0188	0.0128	0.0104	0.0316	0.21	0.0048	0.0012	0.0048	0.012	0.006	0.01	0.0088	0.0676	0.0184	0.0116	0.0184	0.0036	0.0104	0.0152	0.0716	0.2928	0.1412	0.0028	0.0716	0.4372	0.1612	0.0164	0.096	0.0008	0.0004	0.0136	0.0112	0.0256	0.03	0.0164	0.0348	0.3956	0.0772	0.0004	0.0628	0.01	0.0192	0.012
0.0084	0.072	0.21	0.0468	0.0172	0.196	0.0176	0.132	0.0116	0.4308	0.3984	0.0664	0.0004	0.21	0.0168	0.0032	0.024	0.2872	0.0044	0.4508	0.0204	0.0172	0.0256	0.0312	0.0044	0.0056	0.26	0.0524	0.0044	0.0108	0.0068	1.8244	0.002	0.01	0.0064	0.01	0.0736	0.39	0.0132	0.0116	0.016	0.0124	0.0232	0.1184	0.0004	0.0308	0.0124	0.0256
0.0304	0.016	0.0224	0.0068	0.0256	0.0168	0.0036	0.0128	0.0112	0.3212	0.9044	0.0716	0.0212	0.0176	0.01	0.0384	0.024	0.0092	0.0108	0.2568	0.7316	0.012	0.0164	0.0016	0.0024	0.1992	0.1972	0.0232	0.0024	0.0316	0.0012	0.0124	0.094	0.0128	0.01	0.0176	0.0288	0.0076	0.01	0.0148	0.078	0.3216	0.044	0.016	0.0004	0.004	0.2068	0.028
0.002	0.3136	0.006	0.0064	0.0076	0.0496	0.0792	0.0652	0.2868	0.4784	1.0464	0.0208	0.0296	0.1388	0.0368	0.0648	0.1196	0.0008	0.0308	3.594	0.0028	0.0156	0.0176	0.006	0.0084	0.1208	0.0396	3.3744	0.0084	0.0088	0.0168	0.0252	0.002	0.0008	0.0156	0.1392	0.0164	0.036	0.0136	0.0144	0.11	0.0108	0.0032	0.0024	0.0004	0.0184	0.0368	0.0296
0.0016	0.0944	0.0108	0.0148	0.018	0.0004	0.0316	0.0156	0.0508	0.0224	0.0024	0.004	0.0632	0.022	0.0004	0.0128	0.7016	0.0096	0.0812	0.0144	0.0104	0.0104	0.0144	0.0152	0.0096	0.0012	0.006	1.1424	0.0096	0.0372	0.0472	0.0028	0.016	0.0536	0.0216	0.014	0.0064	0.0052	0.0096	0.0408	0.028	0.0792	0.0108	0.0624	0.0424	1.1088	0.0072	0.0136
0.2984	0.0044	0.0176	0.0152	0.004	0.0152	0.0128	0.082	0.028	0.0012	0.008	0.0052	0.0416	0.696	0.0004	0.0048	0.0748	0.0208	0.0336	0.0136	0.0608	0.0212	0.1132	0.012	0.0096	0.0852	0.0448	0.0264	0.0096	0.0048	0.0052	0.2168	0.0044	0.0016	0.0528	0.012	0.0056	0.026	0.012	0.0132	0.0356	2.7948	0.1124	0.0304	0.0012	0.0536	0.0168	0.0096
0.0004	0.0248	0.0156	0.0492	0.0112	0.002	0.02	0.0276	0.0488	0.0164	0.0764	0.0004	1.0072	0.1448	0.0004	0.0272	0.002	0.0016	0.0164	0.0072	0.0216	0.0456	0.0132	0.0256	0.0056	0.1472	0.0004	3.968	0.0056	7.6028	0.0408	0.0192	0.076	0.0124	0.1624	0.01	0.0092	0.058	0.0076	0.0124	0.0164	0.0468	0.124	0.0148	0.0004	0.1512	0.0176	0.0036
0.0008	0.0228	0.3476	0.1544	0.0144	0.0172	0.0556	0.0572	0.0116	0.018	0.0416	0.0124	0.0004	0.0944	0.0048	0.064	0.0044	0.2244	0.0084	0.076	0.0004	0.0184	0.012	0.052	0.2984	0.014	0.0004	0.0008	0.2984	0.008	0.0072	0.018	0.0096	0.0052	0.006	0.024	0.0372	0.0512	0.0124	0.0028	0.0008	0.0156	0.3908	0.016	0.0008	0.0004	0.018	0.002
0.0252	0.0316	0.012	0.0056	0.018	0.0144	0.0468	0.0024	0.0172	0.0092	0.0104	0.0432	0.0188	0.02	0.25	0.0184	0.0148	0.0088	0.0076	0.102	0.0276	0.026	0.0096	0.0132	0.0504	0.0036	0.316	0.0672	0.0504	0.012	0.008	0.006	0.0336	0.0148	0.1504	0.012	0.008	0.0192	0.1652	0.0136	0.018	0.0024	0.0944	0.016	2.184	0.0088	0.1468	0.2044
0.0148	0.3804	0.0272	0.01	0.008	0.0076	0.012	0.0296	0.05	0.0844	0.0628	0.0144	0.008	0.01	0.0076	0.1344	0.0044	0.0004	0.0108	0.0024	0.0004	0.0272	0.0188	0.0132	0.038	0.0852	0.0128	0.0412	0.0386	0.1556	0.0004	0.0056	0.0112	0.0288	0.0164	0.0076	0.0116	0.002	0.0144	0.0116	0.0004	0.052	0.0004	0.4304	0.0224	0.0268	0.086	0.212
0.0092	0.0212	0.0032	0.0384	0.1824	0.0028	0.0132	0.0032	0.0888	0.1528	0.0072	0.0092	0.0148	0.0096	0.0636	0.01	0.9692	0.0028	0.012	0.014	0.0024	0.0184	0.0128	0.002	0.0036	0.0128	0.012	0.0084	0.0036	0.0252	0.0024	0.1108	0.0208	0.0172	0.048	0.0248	0.0128	0.0016	0.0104	0.0148	0.0004	0.0108	0.114	0.0088	0.0004	0.1864	0.106	0.0084
0.0644	0.0164	0.0632	0.0188	0.016	0.0136	0.0188	0.0156	0.0024	7.9064	0.016	0.7132	0.0112	0.332	0.0036	0.0148	0.0168	0.0004	0.0112	2.4784	0.0148	0.0344	0.0152	0.0012	2.6928	0.0156	0.1724	0.014	2.6928	0.0096	0.0004	0.02	0.006	0.0032	0.054	0.012	0.0368	0.0056	0.014	0.0128	1.7624	0.1352	0.0056	0.0328	0.0096	0.0392	0.024	0.074
0.0684	0.0072	0.0112	0.0012	0.0476	0.0464	0.2892	0.0132	0.416	0.0408	0.0252	0.0264	0.142	3.8652	0.2484	0.0056	0.002	0.018	0.0332	0.0008	0.006	0.0632	0.0128	0.0124	0.2288	0.1252	0.108	0.0012	0.2288	0.5144	0.0036	0.2424	0.0276	0.0444	0.0364	0.1284	0.0148	0.0112	0.0112	0.06	0.2408	0.1232	0.0568	0.0004	0.0008	0.1016	0.5048	0.028
0.0036	0.0492	0.0044	0.0084	0.0248	0.006	0.01	0.032	0.2256	0.3072	0.0004	0.0532	0.01	0.0236	0.0008	0.0012	0.0004	0.0012	0.0196	0.0004	0.0896	0.0004	0.0152	0.032	0.0124	0.1812	0.086	0.0116	0.0124	0.0056	0.0004	0.1084	0.0176	0.0076	0.0076	0.0172	0.0148	0.0384	0.0016	0.014	0.0164	0.0128	0.0308	0.0204	0.0004	0.0108	0.0132	0.04
0.004	0.0924	0.01	0.0084	0.0108	0.0088	0.0308	0.056	0.0584	0.0004	0.2152	0.004	0.0084	0.0168	0.0228	0.0584	0.2964	0.0024	0.0016	0.0172	0.0092	0.0176	0.018	0.0272	0.0148	0.0104	0.1252	0.5292	0.0148	0.0456	0.0212	0.016	0.0236	0.014	0.0272	0.0212	0.0356	0.0028	0.0112	0.0168	1.7364	0.0252	0.1428	0.0032	0.0004	0.0084	1.5296	0.0008
0.0076	0.0004	0.0064	0.0572	0.0048	0.0148	0.0152	0.0204	0.0096	0.0008	3.414	0.0012	0.0524	0.118	0.0092	0.0116	0.0016	0.1124	0.0104	0.0576	0.0052	0.0108	0.0324	0.0152	0.0076	0.0308	0.0028	0.4556	0.0076	0.024	0.0004	0.0176	0.036	0.0128	0.0272	0.0088	0.0228	0.0224	0.0276	0.0124	1.6692	0.0096	0.3752	0.0628	0.0004	0.0016	0.0588	1.5524
0.0188	0.3136	0.0228	0.0068	0.0456	0.0024	0.0556	0.0048	0.1792	0.0968	0.012	0.0028	0.0032	0.0132	0.0132	0.0148	0.008	0.0364	0.006	0.0028	0.168	0.3012	0.0472	0.016	0.0048	0.0168	0.0156	0.0036	0.0048	0.0072	0.0004	0.028	0.0104	0.024	0.01	0.0136	0.0148	0.0468	0.0604	0.0032	7.7272	0.002	1.3632	0.0036	0.0008	0.0092	0.1324	0.0156
0.1228	0.0012	0.0596	0.0132	0.0204	0.0068	0.012	0.0148	0.0124	0.0156	0.0124	0.1288	0.0888	0.008	0.0004	0.0188	0.0108	0.004	0.0004	0.0508	1.2512	0.0212	0.012	0.014	0.0576	0.366	0.002	0.0196	0.0576	0.296	0.0012	0.9672	0.0204	0.0128	0.0108	0.012	0.0028	0.0196	0.0172	0.0196	4.762	0.0268	0.0024	46.1504	15.542	1.6252	0.0808	1.6416
0.0024	0.0288	0.0204	0.0168	0.0256	0.0024	0.0128	0.014	0.0068	0.008	0.0416	0.002	0.2024	5.1424	0.0232	0.0004	0.0624	0.0704	0.0284	0.7084	0.002	0.014	0.0272	0.0024	0.0008	0.224	0.138	0.868	0.0008	0.002	0.0244	0.1572	0.0016	0.0344	0.0012	0.01	0.014	0.068	0.0116	0.0608	0.0024	0.0028	0.0008	0.0008	0.5748	0.064	0.0188	0.0144
0.0424	0.11	0.0188	0.0116	0.0116	0.0004	0.0324	0.01	0.484	0.0204	0.01	0.0468	0.1076	0.022	0.0004	0.0812	0.0116	0.0004	0.0072	0.1696	0.0048	0.0004	0.0144	0.0108	0.302	0.11	0.2688	0.0328	0.3028	1.1028	0.0196	1.7412	0.0556	0.004	0.0188	0.0384	0.0116	0.0364	0.0104	0.2608	0.0352	0.0008	0.0296	0.002	0.0016	0.0028	0.0056	0.0164
0.0084	0.0848	0.0348	0.0508	0.1792	0.0144	0.63	0.0456	0.0292	0.0004	0.0204	0.0304	0.0208	0.0912	0.0012	0.0088	0.0904	0.0004	0.0172	0.0036	0.0132	0.0008	0.01	0.0004	0.0288	0.1884	0.0308	0.0176	0.0288	0.0148	0.0016	0.0088	0.0288	0.0072	0.0124	0.0112	0.0016	0.0072	0.0124	0.0176	0.0084	0.0332	0.7916	0.8336	0.6328	0.108	0.0736	0.0468
0.0272	0.01	0.0004	0.0032	0.138	0.026	0.0156	0.0512	0.086	0.0004	0.0004	0.0028	0.0128	0.004	0.052	0.0108	1.736	0.0248	0.032	0.0172	0.0044	0.5728	0.014	0.018	0.0872	4.998	0.928	0.002	0.0872	1.1568	0.0524	0.0104	0.0004	0.0588	0.0792	0.0556	0.0044	0.0128	0.0256	0.008	0.024	0.0536	0.0132	0.0148	0.0176	0.0188	0.0288	0.0056
0.0168	0.0176	0.0028	0.028	0.0052	0.0292	0.0144	0.0224	0.0472	0.0024	0.06	0.0088	0.0128	0.016	0.0136	0.0152	0.0188	0.0408	0.0088	0.0312	0.02	0.0532	0.0044	0.0236	0.0128	0.1	0.0096	0.0164	0.0128	0.0088	0.0388	0.0016	0.0004	0.0928	0.0044	0.0384	0.0236	0.0152	0.0048	0.0232	0.1236	0.0232	0.004	0.0312	0.1112	0.1792	0.0148	0.0312
0.0008	0.0668	0.0096	0.0188	0.012	0.0136	0.0124	0.0152	0.2724	0.0116	0.0196	0.3356	0.1516	0.1136	0.018	0.0728	0.0024	0.0064	0.0064	0.0116	0.024	0.0212	0.0128	0.0168	0.1528	0.3932	0.0444	0.0036	0.1528	0.0072	0.0076	0.002	0.0112	0.008	0.0044	0.0036	0.0108	0.002	0.0004	0.0324	0.036	0.01	0.012	0.0016	0.2312	2.8708	0.1796	0.0028
0.0008	0.0048	0.0104	0.0112	0.1288	0.0124	0.0172	0.0016	0.0024	0.2576	0.0044	0.0064	0.0264	0.0136	0.0124	0.0212	0.0004	0.0308	0.006	0.2108	0.0588	0.0736	0.0248	0.034	0.0464	0.1	0.294	0.1628	0.0464	0.2284	0.0572	0.0128	0.01	0.0128	0.0152	0.012	0.006	0.002	0.0004	0.0092	0.0084	0.5712	0.0528	0.0324	0.0032	0.0152	0.0756	0.0248
0.19	0.4232	0.0136	0.0204	0.0032	0.0112	0.01	0.004	0.1632	0.018	0.0012	0.4368	0.004	0.0124	0.11	0.0276	0.0024	0.0072	0.0088	0.0136	0.0068	0.0168	0.0124	0.028	0.6336	0.06	1.052	0.0216	0.042	0.0876	0.0116	0.0292	0.002	0.0004	0.0288	0.0228	0.0268	0.0004	0.01	0.01	0.0964	0.0064	0.0592	0.5572	0.0016	0.2536	0.2256	0.0024
0.058	0.0016	0.0076	0.0056	0.006	0.0812	0.0144	0.0144	0.054	0.064	0.0108	0.0048	0.0752	0.1704	0.0028	0.0128	0.0008	0.0392	0.1616	0.1828	0.0176	0.0188	0.0104	0.016	0.0664	0.0004	0.0064	0.024	0.0664	0.0004	0.0044	0.0108	0.0124	0.0028	0.028	0.0104	0.0084	0.0292	0.0416	0.0132	0.0144	0.086	0.1736	0.1428	0.0004	0.0584	0.0004	0.008
0.0564	0.0028	0.0228	0.0176	0.0356	0.1332	0.166	0.01	0.0236	0.0168	0.0516	0.0392	0.0064	0.0392	0.0356	0.0052	0.45	0.0196	0.0056	0.012	0.0868	0.0048	0.01	0.0004	0.1724	1.6984	0.002	0.5016	0.1724	0.0144	0.1788	0.1212	0.0128	0.0116	0.0024	0.0164	0.0172	0.0168	0.0112	0.0136	0.0196	0.0892	0.0068	0.0012	0.0292	0.0188	0.058	0.0176
0.0108	0.0896	0.0016	0.0048	0.1092	0.024	0.0004	0.0104	0.024	0.0024	0.0536	0.1728	0.0232	0.6624	0.0984	0.0128	0.0156	0.0216	0.0032	0.04	0.0012	0.044	0.01	0.012	0.076	0.0208	0.4124	0.0172	0.0764	0.038	0.006	0.0124	0.0144	0.0748	0.0428	0.0316	0.0004	0.0736	0.014	0.0212	0.0592	0.0136	0.0008	0.0044	0.0228	0.0952	0.0096	0.0036
0.0148	0.028	0.0884	0.1116	0.0236	0.0072	0.0036	0.048	0.2628	0.0012	0.0016	0.0044	0.158	0.0792	0.0096	0.0708	0.1376	0.0548	0.0508	0.0012	0.0132	0.0356	0.0136	0.0228	0.0004	0.0208	0.004	0.4972	0.0004	0.116	0.0156	0.0068	0.0944	0.0132	0.0036	0.0084	0.0096	0.0008	0.018	0.0264	0.0008	0.0488	0.3296	0.894	11.7136	1.9772	0.0008	0.0048
0.006	0.0036	0.1216	0.0392	0.084	0.0456	0.0164	0.014	0.0196	4.2888	0.0176	0.0016	0.1492	0.442	0.188	0.01	0.0008	0.0004	0.0108	0.104	0.0092	0.044	0.012	0.0024	0.1008	0.128	0.0724	0.1104	0.1008	0.0196	0.0516	0.0168	0.0116	0.0148	0.0184	0.0008	0.0188	0.0052	0.0172	0.018	0.0044	0.8384	0.0296	0.7172	0.0052	0.1932	0.0164	0.1764
0.0028	0.006	0.0652	0.0036	0.0204	0.1136	0.022	0.0456	0.0012	0.0716	0.0004	0.0164	0.0036	0.004	0.088	0.0164	0.1032	0.0004	0.0692	0.0128	0.0408	0.0096	0.0132	0.0416	0.0164	0.0056	0.0664	0.0112	0.018	0.0348	0.0104	0.0456	0.0084	0.0008	0.0216	0.012	0.014	0.0368	0.0112	0.0376	0.0004	0.0356	0.0024	0.0808	5.4792	0.0136	0.1676	0.012
0.0492	0.4888	0.0128	0.0224	0.0188	0.0144	0.0128	0.1472	0.0088	0.0332	0.0028	0.054	0.0468	0.0064	0.1852	0.0004	0.0036	0.0304	0.0052	0.0316	0.3532	0.044	0.0144	0.002	0.756	0.3816	0.2516	0.0116	0.756	0.0104	1.2644	0.08	0.0344	0.0096	0.0272	0.0056	0.1068	0.1296	0.0128	0.0232	0.0004	0.0008	0.0476	0.0064	0.0228	0.2808	0.01	0.0308
0.0616	0.0324	0.0132	0.0084	0.0104	0.012	0.0148	0.0168	0.1732	0.3892	0.0064	0.16	0.428	0.2616	0.0068	0.0004	0.056	0.0004	0.008	0.0104	0.006	0.0364	0.0156	0.016	0.1192	0.0288	0.0076	0.1392	0.1192	0.238	0.0084	0.0096	1.438	0.0004	0.01	0.016	0.0108	0.0152	0.01	0.0132	0.3844	0.0028	2.9188	0.0096	0.0008	0.0108	0.066	0.018
0.0492	0.142	0.016	0.0296	0.0128	0.004	0.0296	0.0144	0.012	0.1164	0.0032	0.0288	0.2168	1.5244	0.0064	0.036	0.0292	0.0004	0.048	0.0648	0.014	0.014	0.0252	0.0072	0.0036	0.0128	0.0472	0.0944	0.0036	0.2128	0.0016	0.0168	0.0132	0.0168	0.01	0.0196	0.0012	0.024	0.0124	0.008	0.0172	0.32	0.0452	6.6672	0.042	0.006	0.0236	0.0044
0.004	0.014	0.0096	0.0192	0.0012	0.0136	0.0008	0.016	0.2416	0.0776	0.0572	0.9656	0.112	0.0132	0.0008	0.0176	0.4708	0.0116	0.0136	0.04	0.0004	0.0168	0.0192	0.004	0.004	0.0112	0.0244	0.148	0.004	0.0008	1.762	0.054	0.0364	0.0032	0.036	0.0164	0.0052	0.0028	0.1544	0.0132	0.0052	0.0104	0.0068	0.0004	0.0164	0.0472	0.0428	0.0216
0.006	0.0324	0.0064	0.0108	0.0236	0.002	0.1048	0.0164	0.0076	0.0452	0.0512	0.1028	0.0316	0.0056	0.0216	0.0124	0.0004	0.066	0.0332	0.0024	0.0024	0.01	0.0128	0.0272	0.0052	0.1108	0.0016	0.0032	0.0052	0.0324	0.0032	0.0312	0.038	0.0132	0.0108	0.0132	0.0172	0.1432	0.0112	0.0076	0.1656	0.0876	0.0324	0.1192	0.07	0.0016	0.0012	0.0316
0.1012	0.0344	0.0256	0.0076	0.0616	0.0012	0.0264	0.0016	0.0164	0.0624	0.122	1.0272	0.0188	0.0276	0.0112	0.0132	0.0212	0.0004	0.0364	0.0268	0.0244	0.0248	0.014	0.0224	0.1272	0.1472	0.3124	0.0032	0.1272	0.016	0.072	0.03	0.0128	0.0068	0.0136	0.0112	0.0228	0.004	0.0232	0.0004	1.1908	0.3572	0.496	0.0048	0.0204	0.0028	0.0044	0.0228
0.0232	0.0064	0.012	0.0012	0.0112	0.014	0.0136	0.03	0.0284	0.2016	0.0152	0.03	0.0528	0.0088	0.0132	0.0424	0.004	0.012	0.0016	0.0128	0.1584	0.0004	0.014	0.0104	0.8516	0.1516	0.4252	0.0016	0.8516	0.1736	0.0068	0.0144	0.0128	0.0036	0.0488	0.13	0.0136	0.0812	0.0144	0.0352	0.0168	0.022	0.0096	0.0016	0.0204	0.0028	0.0792	0.018
0.044	0.002	0.002	0.0152	0.018	0.0556	0.006	0.0112	0.0004	0.0004	0.046	0.0064	0.0168	0.006	0.0132	0.0212	0.0344	0.0024	0.0112	0.0684	0.002	0.01	0.0064	0.0076	0.0804	0.1132	0.0224	0.0108	0.02	0.0016	0.0572	0.01	0.0032	0.0132	0.006	0.034	0.0056	0.0184	0.014	0.028	0.0024	0.2444	0.0336	0.0016	0.0216	0.002	0.0012	0.24
0.024	0.0108	0.2016	0.0112	0.0136	0.0036	0.004	0.014	0.0472	0.5412	0.0116	0.0188	0.0072	0.0636	0.4712	0.0052	0.306	0.0004	0.2356	0.0052	0.1084	0.0016	0.0016	0.01	0.412	0.0064	0.0188	0.0232	0.4128	0.0084	0.0004	0.0872	0.0704	0.0008	0.0204	0.0076	0.0164	0.0004	0.01	0.0228	1.042	0.022	0.0856	0.104	0.0084	0.0092	0.002	0.008
0.0092	0.0276	0.0752	0.0188	0.1716	0.0644	0.0132	0.0048	0.0072	0.04	0.0124	0.0212	0.632	0.076	0.0392	0.0364	0.0448	0.0092	0.0064	0.0128	0.026	0.0004	0.0436	0.068	0.0524	0.0736	0.0068	0.6548	0.0524	0.3872	0.0556	0.496	0.0012	0.0064	0.0116	0.0128	0.0092	0.1524	0.0128	0.0444	0.046	0.0004	0.1384	0.114	0.0144	0.0132	0.0008	0.0004
0.0164	0.0004	0.1652	0.012	0.0704	0.0632	0.0848	0.0156	0.036	0.1464	0.0036	0.0124	0.014	0.4	0.0112	0.0128	0.0492	0.0112	0.0016	0.1056	0.0052	0.0176	0.018	0.0084	0.0096	0.0584	0.0288	1.4612	0.0096	0.8264	0.0004	0.7552	0.0112	0.0232	0.0084	0.028	0.036	0.014	0.0132	0.0116	0.0008	0.0436	0.0216	0.0864	0.0032	0.0384	0.0188	0.0192
0.012	0.0388	0.0132	0.0092	0.0284	0.0128	0.0328	0.0132	0.0368	1.194	0.0172	0.5704	0.0156	0.0064	0.004	0.0172	0.0104	0.026	0.1908	0.0244	0.004	0.04	0.0144	0.0204	0.7752	0.0344	0.0224	10.8392	0.7752	0.0272	0.0128	12.6636	0.0332	0.0036	0.0484	0.0124	0.0068	0.0824	0.012	0.01	1.3532	0.0028	0.0068	0.022	0.0076	0.0144	0.0016	0.0284
0.0048	0.014	0.01	0.014	0.0124	0.1224	0.1848	0.0676	0.3272	0.5308	0.3764	0.0068	0.04	0.0592	0.018	0.0148	0.7384	0.012	0.0312	0.0368	0.0056	0.0172	0.0128	0.0384	0.0608	0.7944	1.2496	0.1864	0.098	0.0052	0.0248	0.0088	0.2028	0.0044	0.008	0.2928	0.0176	0.0636	0.0192	0.0204	2.4088	0.0828	0.2676	0.0008	0.002	0.0084	0.0376	0.0104
0.0568	0.1268	0.0164	0.016	0.1492	0.01	0.2384	0.0236	0.0068	0.0124	0.0968	0.038	0.006	0.0108	0.014	0.104	0.0096	0.02	0.0148	0.0056	0.7688	0.196	0.032	0.7156	0.1164	0.0844	0.0104	0.1088	0.1164	0.098	0.6644	0.0032	0.01	0.0288	0.0548	0.0096	0.0092	0.0004	0.0064	0.074	0.0188	0.0136	2.636	0.0004	0.0084	0.0324	0.3172	0.0136
0.0568	0.0408	0.0208	0.028	0.032	0.0216	0.01	0.0124	0.0448	0.1312	0.0116	0.0072	0.0052	0.012	0.0056	0.0352	0.0052	0.0032	0.2224	0.0016	0.0544	0.0048	0.012	0.2292	0.0316	0.0052	0.0092	0.0284	0.0316	0.0216	0.05	0.0924	0.0128	0.0152	0.012	0.0124	0.0104	0.18	0.042	0.0316	0.2888	0.1332	0.0316	0.0024	0.0068	0.1876	0.012	0.5804
0.068	0.0096	0.0112	0.0132	0.1056	0.0152	0.066	0.0148	0.0536	0.096	0.0048	0.226	0.042	0.0344	0.5488	0.0128	0.0004	0.016	0.02	0.012	0.0048	0.0028	0.01	0.018	0.0096	0.318	0.0196	0.0092	0.0096	0.0692	0.0252	0.0048	0.0432	0.0092	0.1236	0.0004	0.0148	0.4668	0.0192	0.0152	0.0056	0.0008	0.0032	0.0636	0.0096	0.5744	0.012	0.0104
0.0204	0.0004	0.012	0.0144	0.0092	0.0296	0.0108	0.0488	0.0476	0.0408	0.0004	0.0004	0.1004	0.0508	0.006	0.0164	0.0116	0.0044	0.0144	0.002	0.0564	0.0228	0.0144	0.1004	0.0004	0.0316	0.0068	1.2716	0.004	0.832	0.0216	0.0036	0.0116	0.0132	0.0016	0.008	0.0172	0.0012	0.0052	0.0276	0.082	0.014	0.008	0.0908	0.036	0.0028	0.1168	0.0132
0.0844	0.1992	0.0612	0.014	0.15	0.002	0.0132	0.016	0.0024	0.0212	0.0608	0.1568	0.0036	0.0084	0.0104	0.008	0.0076	0.0156	0.0108	0.0084	0.0072	0.0128	0.0296	0.0172	0.0312	0.018	0.8044	4.4752	0.0312	0.0408	0.3156	0.0184	0.0856	0.008	0.0004	0.0004	0.0144	0.0208	0.0092	0.0332	0.0252	0.0024	0.0048	0.0408	0.0148	0.0232	0.376	0.0132
0.17	0.0072	0.0052	0.0104	0.0116	0.0076	0.0768	0.0204	0.6588	0.05	0.012	0.0128	0.0008	0.0148	0.016	0.0436	0.0012	0.0204	0.1092	0.0052	0.0032	0.0228	0.0348	0.0156	0.04	0.0172	0.3656	0.4252	0.0456	0.0032	0.0712	0.0044	0.0176	0.0012	0.002	0.0012	0.01	0.0364	0.0324	0.0648	0.0008	0.0128	0.006	0.0004	0.0088	0.0004	0.0284	0.0324
0.0124	0.4564	0.0444	0.0616	0.0016	0.0452	0.01	0.0156	0.106	0.0048	0.0096	0.1988	0.0428	0.0544	0.0188	0.0004	0.0316	0.0168	0.0124	0.012	0.0104	0.0756	0.01	0.0116	0.0656	0.1124	0.0064	0.0276	5.122	1.248	1.2208	0.0168	0.0304	0.0324	0.0164	0.0164	0.01	0.0056	0.0104	0.0084	0.0256	0.1172	0.1392	0.0384	0.322	0.0752	0.0236	0.2736
0.0452	0.0472	0.0008	0.02	0.0024	0.0412	0.0232	0.0124	0.0076	0.0016	0.0216	0.0156	0.0052	0.0024	0.0336	0.0308	0.0176	0.0144	0.014	0.0772	0.0332	0.008	0.0024	0.1152	0.1624	0.1472	0.1148	0.0836	0.006	0.01	0.0252	0.0188	0.014	0.0016	0.0132	0.0216	0.0148	0.0156	0.0352	0.0204	0.0004	0.1552	0.0008	0.0308	0.0308	0.0084	0.004	0.0396
0.1652	0.0176	0.0768	0.0224	0.0024	0.0044	0.0148	0.5	0.0128	0.0196	0.0128	0.0868	0.0212	0.0008	0.0724	0.0124	0.0044	0.002	0.2752	0.0212	0.0408	0.0492	0.01	0.0188	0.0776	0.1396	0.04	0.0204	0.03	0.0152	0.0352	0.0352	0.0332	0.0328	0.026	0.032	0.0648	0.0224	0.016	0.0128	0.006	0.0316	0.0172	0.0112	0.0048	0.0064	0.3152	0.0136
0.008	0.0076	0.0112	0.0176	0.0116	0.214	0.0328	0.0144	0.0176	0.0916	0.0088	0.192	0.0136	0.0716	0.1088	0.01	0.0096	0.014	0.0124	0.0128	0.0196	0.0332	0.1696	0.0104	0.0076	3.0344	0.0236	2.5024	0.0076	0.0652	0.0824	0.048	0.0016	0.0056	0.0372	0.002	0.0516	0.1504	0.0112	0.0092	0.0104	0.25	0.002	0.0092	0.2572	0.0684	0.2836	0.0328
0.0352	0.0096	0.0056	0.0004	0.028	0.0272	0.0296	0.0124	0.1068	0.0164	0.024	0.0104	0.0452	0.3212	0.0128	0.0416	0.0048	0.026	0.0168	0.0132	0.088	0.0096	0.0176	0.0116	0.0296	0.0016	0.0012	0.012	0.0296	0.306	0.1092	0.0416	0.0244	0.0044	0.0132	0.0096	0.0456	0.0272	0.0092	0.0172	0.0012	0.0172	1.016	0.0268	0.0288	0.0584	0.084	0.034
0.0224	0.0004	0.016	0.0284	0.0276	0.0144	0.0084	0.01	0.0476	0.052	0.0092	0.2684	0.0344	0.0108	1.0556	0.0004	0.0144	0.032	0.012	0.0004	0.0344	0.0008	0.014	0.0172	0.0224	0.1188	0.0232	0.0004	0.0224	2.112	0.2608	0.0088	0.0184	0.0624	0.0028	0.0104	0.042	0.0144	0.048	0.0184	0.0088	0.0124	0.01	0.1752	0.0064	0.024	0.0348	0.0276
0.0084	0.05	0.0184	0.0008	0.002	0.0296	0.0224	0.0124	0.3656	0.0064	0.01	0.0076	0.0064	0.1192	0.0168	0.028	0.0008	0.0356	0.0376	0.0244	0.1348	0.0092	0.0164	0.01	0.0208	0.0368	0.01	0.014	0.0208	0.1888	0.0012	0.0304	0.02	0.01	0.0188	0.006	0.0296	0.0064	0.046	0.0144	0.456	0.0092	0.0184	0.0568	0.004	0.0156	1.3336	0.1596
0.016	0.1056	0.012	0.0248	0.0848	0.0428	0.0096	0.0296	0.0044	0.0036	0.004	0.0004	0.0092	0.1224	0.1768	0.0152	0.0184	0.0268	0.008	0.0148	0.0168	0.006	0.0076	0.0404	0.0092	0.048	0.412	0.3304	0.0092	0.0332	0.0244	0.53	0.0404	1.0152	0.0032	0.0076	0.0028	0.0132	0.0096	0.0148	0.0008	0.0288	0.0032	0.0164	0.0064	0.0416	0.0012	0.0036
0.0304	0.0844	0.0572	0.0012	0.0024	0.006	0.2488	0.0788	0.0732	0.0472	0.0036	0.0076	0.0236	0.6528	0.0748	0.0248	0.0044	0.0304	0.0176	0.0528	0.036	0.0128	0.018	0.0164	0.4652	0.2004	0.0124	0.3932	0.4652	0.0552	0.012	0.0024	0.014	0.0148	0.0004	0.0112	0.0144	0.0232	0.0192	0.014	18.3452	0.0132	0.1052	0.0416	0.0072	0.0128	0.1672	0.0244
0.0004	0.0052	0.0104	0.008	0.0028	0.004	0.0112	0.0128	0.0008	0.0692	0.0424	0.0036	0.0076	0.0052	0.0324	0.014	0.0008	0.0268	0.0492	0.0372	0.0116	0.008	0.012	0.0176	0.0064	0.0012	0.0236	0.0212	0.0064	0.0004	0.0544	0.0064	0.0008	0.0184	0.0436	0.3252	0.1032	0.0164	0.008	0.0176	0.0436	0.1596	0.0112	0.47	0.0036	0.0036	0.0008	0.0148
0.036	0.0152	0.0232	0.0036	0.3556	0.3512	0.0104	0.0176	0.1156	0.0184	0.0296	0.0148	0.0908	0.0968	0.0256	0.0104	0.0288	0.0116	0.0268	0.0112	0.0192	0.0272	0.0324	0.0128	0.0204	0.2568	0.0688	0.024	0.002	0.1476	0.018	0.5792	0.0068	0.0216	0.0156	0.0104	0.01	0.0144	0.0124	0.0112	0.196	0.188	0.008	0.0008	0.0024	0.1704	0.8644	0.0008
0.0136	0.0112	0.0128	0.062	0.0692	0.0076	0.014	0.0136	0.026	0.0052	0.0068	0.0684	0.0088	0.0264	0.004	0.0032	0.0132	0.1148	0.0256	0.0052	0.0148	0.0228	0.0284	0.0044	0.0084	0.0012	0.0328	0.0028	0.0084	0.0076	3.0116	0.0088	0.0156	0.0128	0.0456	0.0136	0.0032	0.0256	0.0316	0.0132	0.0436	0.0056	0.0136	0.0096	0.0552	1.4432	0.0152	0.5144
0.0108	0.0088	0.1664	0.1232	0.002	0.004	0.0208	0.0156	0.0116	0.08	0.0204	0.0076	0.04	0.2352	0.3652	0.0136	0.0108	0.0216	0.0152	0.0604	0.0484	0.0244	0.0168	0.2368	0.0648	0.132	0.018	0.0004	0.0648	0.0084	0.0576	0.0372	0.0204	0.0128	0.0104	0.014	0.01	0.0728	0.0164	0.0364	0.4912	0.4496	0.0892	0.0052	0.0012	0.1124	0.0012	0.008
0.0008	0.016	0.6584	0.5904	0.1072	0.0008	0.012	0.0224	0.6776	0.0052	0.0056	0.0696	0.5524	0.0156	0.0144	0.0052	0.076	0.02	0.0172	0.0152	0.0012	0.0196	0.0188	0.0196	0.1224	0.014	0.0152	0.002	0.1224	0.0156	0.0004	0.02	0.5944	0.1556	0.0036	0.0132	0.012	0.006	0.016	0.0148	0.0056	0.0796	0.0516	0.164	0.0852	0.0088	0.0304	0.028
0.042	0.1756	0.0232	0.0148	0.0124	0.0236	0.1212	0.01	0.1036	0.1576	0.3132	0.0044	0.0132	0.0884	0.0052	0.0176	0.0216	0.0064	0.028	0.0352	0.0008	0.0144	0.0164	0.0376	6.7572	0.0092	0.2676	0.0004	6.7572	0.0008	0.012	0.002	0.0532	0.0152	0.0316	0.0104	0.0188	0.0076	0.01	0.082	1.958	0.0056	0.0076	0.0188	0.0044	0.2088	0.3208	0.0144
0.0828	0.0616	0.0112	0.0096	0.0184	0.0072	0.2116	0.0112	0.164	0.2576	0.0136	0.2748	0.0024	0.0036	0.0192	0.0192	0.0004	0.0056	0.0048	0.0948	0.01	0.0008	0.0304	0.0188	0.152	0.0112	0.0028	0.0208	0.1528	3.0036	0.858	0.0108	0.752	0.0408	0.0456	0.0004	0.012	0.026	0.01	0.0124	0.0244	0.0212	1.0604	0.0204	0.0208	0.0616	0.0036	0.1516
0.0012	0.0072	0.2748	0.0168	0.012	0.036	0.0196	0.0188	0.324	0.0436	0.0912	0.0364	0.0092	0.0208	0.1444	0.002	0.0528	0.0404	0.0432	0.6616	0.0008	0.0268	0.0148	0.1176	1.0872	0.0048	0.2544	0.03	0.12	0.1012	0.0304	0.054	0.0488	0.0124	0.0236	0.022	0.0168	0.0008	0.03	0.0152	0.02	0.028	0.002	0.5488	0.0108	0.0136	0.0068	0.0364
0.028	0.0368	0.0124	0.0248	0.0296	0.0048	0.0152	0.0104	0.0732	0.0616	0.018	0.028	0.0208	0.0888	0.0256	0.1276	0.0164	0.0404	0.0044	0.3712	0.0136	0.152	0.016	0.0144	0.2488	0.0072	0.0072	0.0024	0.012	0.6176	0.0008	0.0024	0.0912	0.0124	0.168	0.0584	0.0024	0.0048	0.004	0.0136	0.0588	0.024	0.1652	0.0292	0.058	1.2476	0.0548	0.0128
0.0276	0.0316	0.1368	0.0592	0.0144	0.0224	0.196	0.008	0.1244	0.0408	0.0076	0.0092	0.054	0.1168	0.0076	0.048	0.1896	0.012	0.014	0.032	0.0284	0.0004	0.056	0.0044	0.0344	0.0296	0.002	0.0036	0.0344	0.048	0.0208	0.0104	0.0072	0.0068	0.0888	0.0068	0.0064	0.0076	0.0456	0.0128	0.14	0.032	0.1476	0.0588	0.348	0.1548	0.0108	0.0252
0.0288	0.0152	0.1944	0.0676	0.0084	0.0132	0.41	0.0124	0.0904	0.2328	0.0296	0.0096	0.002	0.0236	0.0684	0.0204	0.0408	0.0424	0.0372	0.0172	0.0116	0.0008	0.0132	0.012	2.2984	0.4444	0.002	0.0564	2.2984	0.032	0.028	5.5564	0.0216	0.0096	0.0212	0.0108	0.0052	0.0132	0.0108	0.0232	0.0932	0.0028	0.0012	0.0108	0.0116	0.0048	0.0096	0.0488
0.0104	0.0248	0.1124	0.0044	0.0268	0.0004	0.014	0.05	0.0412	2.1708	0.0092	0.0868	0.0184	0.0048	0.0708	0.0288	0.58	0.0016	0.0028	0.0104	0.028	0.0016	0.004	0.0104	0.0224	0.02	0.0424	1.2012	0.0224	0.0792	0.01	0.01	0.0032	0.0104	0.138	0.0272	0.0124	0.0128	0.0156	0.012	0.586	0.0284	0.3016	0.0156	0.0276	0.116	0.0024	0.026
0.072	0.0052	0.0092	0.0136	0.0052	0.0324	0.0164	0.012	0.1384	0.0128	0.0324	0.0188	0.0004	0.002	0.282	0.0048	0.02	0.0556	0.0068	0.0032	0.0128	0.0504	0.0004	0.0172	0.0016	0.0004	0.236	0.0104	0.0016	0.002	0.0012	0.0132	0.0316	0.0104	0.0116	0.04	0.0096	0.0048	0.0124	0.05	0.1244	0.034	0.0436	0.0008	0.1348	0.0892	0.0036	0.5188
0.2788	0.1564	0.0132	0.054	0.0044	0.0004	0.0204	0.0856	0.0212	0.0124	0.0172	0.0116	0.0372	0.0012	0.1576	0.0016	0.0096	0.022	0.6548	0.0128	0.1396	0.0328	0.006	0.0128	1.1816	0.002	0.0296	0.006	1.1816	0.0376	0.1572	0.0084	0.0096	0.0276	0.0128	0.0116	0.018	0.0196	0.0488	0.01	0.0028	0.0264	0.3168	0.0004	0.004	0.0692	0.0412	0.0132
0.0084	0.0296	0.0096	0.0976	0.014	0.0272	0.0736	0.0056	0.016	0.7364	0.0036	0.0048	0.0104	0.004	0.0196	0.0152	0.0016	0.0284	1.0844	0.0112	0.0144	0.004	0.0104	0.0072	0.0204	0.0256	0.0452	0.0092	0.0204	0.2556	0.118	1.3904	0.0256	0.0136	0.016	0.0004	0.0196	0.0336	0.0272	0.098	0.0352	0.0192	0.0284	0.0376	0.2236	3.4068	0.0628	0.0304
0.0048	0.0068	0.09	0.0504	0.3984	0.0112	0.0244	0.0132	0.036	0.0076	0.0168	0.0952	0.0168	0.4036	0.0752	0.0048	0.0328	0.0096	0.2616	0.0016	0.0296	0.0508	0.0528	0.024	0.108	0.1488	0.014	0.03	0.1088	0.0132	0.0164	0.0012	0.0108	0.0188	0.0104	0.0136	0.0164	0.0032	0.0068	0.014	0.4376	0.1064	0.8652	0.082	0.0244	0.1632	0.0376	0.0092
0.0004	0.0076	0.0128	0.0144	0.0424	0.0008	0.0116	0.0116	0.0164	0.0348	0.012	0.0916	0.0328	0.0056	0.0144	0.0124	0.016	0.0412	0.0196	0.0172	0.328	0.012	0.0464	0.0124	0.0408	0.0016	0.0692	0.0192	0.0408	0.0148	0.1424	0.0016	0.0112	0.342	0.0476	0.112	0.0456	0.0376	0.0288	0.0096	0.0672	0.01	0.128	0.0424	0.0588	0.028	0.014	0.0272
0.4136	0.0004	0.004	0.014	0.026	0.028	0.012	0.0132	0.0444	0.0924	0.0756	0.0068	1.2288	0.0032	1.2784	0.0384	0.3836	0.0196	0.446	0.1196	0.0032	0.0996	0.01	0.0656	0.002	0.0068	0.0692	0.0092	0.002	0.084	0.0012	0.0468	0.0028	1.0148	0.1012	0.01	0.0168	0.0016	0.0336	0.0296	0.006	1.554	0.8068	0.074	0.0068	0.0024	0.0088	0.0348
0.0036	0.0172	0.012	0.0128	0.0188	0.0168	0.0092	0.0168	0.0024	0.0248	0.0116	0.0164	0.0208	0.0004	0.0072	0.0056	0.016	0.0056	0.004	0.0036	0.0184	0.3468	0.02	0.0096	0.0708	0.0024	3.5776	0.0392	0.0708	0.0048	0.0064	0.5184	0.0096	0.0124	0.1096	0.0188	0.0088	0.01	0.0144	0.014	0.0364	0.0324	0.2812	0.0024	0.0292	0.0484	0.0116	0.026
0.04	0.0004	0.1276	0.0104	0.0284	0.0152	0.02	0.0624	0.0196	0.0004	0.0376	0.0004	0.0156	0.0344	0.0452	0.1668	0.0012	0.0068	0.0492	0.0176	0.0296	0.0184	0.0292	0.0184	0.0964	0.602	0.0592	0.008	0.0964	0.2308	1.3244	0.0044	0.0052	0.0268	0.0272	0.0244	0.0004	0.0012	0.0236	0.0184	0.0004	0.4688	0.0236	0.0112	0.078	0.0684	0.0148	0.0132
0.106	0.004	0.1572	0.026	0.008	0.0112	0.01	0.0176	0.0036	0.1188	0.0348	0.0028	1.7864	0.9852	0.0136	0.0124	0.07	0.05	0.1108	0.0028	0.0112	0.0116	0.0088	0.0132	0.1144	0.4536	0.0132	0.7132	0.1144	0.0396	0.0416	0.02	0.0116	0.072	0.0244	0.0076	0.0108	0.0268	0.0068	0.0144	0.006	0.0048	0.0016	0.7512	0.0056	0.0276	0.0032	0.0156
0.012	0.2476	0.0492	0.024	0.0004	0.0368	0.0256	0.014	0.0568	0.5388	0.004	0.008	0.008	0.002	0.01	0.0068	0.1212	0.0148	0.0024	0.0308	0.0052	0.0256	0.0044	0.0108	0.0276	0.0172	1.4488	0.0004	0.0276	0.1632	0.1228	0.0192	0.0284	0.0108	0.01	0.0172	0.0216	0.0036	0.0112	0.012	0.2112	0.008	0.0012	0.0324	0.0076	0.0164	0.018	0.0132
0.0096	0.0004	0.0348	0.0136	0.0112	0.0172	0.012	0.0128	0.4772	0.004	0.0144	0.002	0.0112	0.8144	0.0224	0.0092	0.0504	0.0364	0.012	0.0044	0.0024	0.0024	0.0072	0.026	0.1452	0.0136	0.002	0.004	0.1452	0.802	0.0092	0.0116	0.0156	0.0884	0.0172	0.0304	0.0144	0.0184	0.0124	0.0644	0.1408	0.0236	0.0348	0.018	0.0416	0.0572	0.0036	0.0128
0.0004	0.0024	0.0156	0.0308	0.0868	0.0168	0.0108	0.0276	0.012	0.2864	0.0192	0.026	0.0052	0.098	0.1104	0.0764	2.4124	0.004	0.0012	0.0004	0.1136	0.0088	0.0248	0.0376	0.5856	0.0084	0.0148	0.0024	0.5856	0.022	0.0904	0.1716	0.0136	0.324	0.0192	0.04	0.0204	0.0248	0.026	0.012	0.2268	0.0104	0.0104	0.0084	0.0032	0.0096	0.0012	0.046
0.0632	0.028	0.0156	1.1688	0.0084	0.036	0.012	0.0112	0.0816	0.03	0.0004	0.0012	0.0136	0.0136	0.1172	0.01	0.0012	0.0024	0.0148	0.0092	0.0016	0.0376	0.0208	0.01	0.0008	0.1456	0.0124	0.4404	0.0008	1.66	0.0704	0.0584	0.0016	0.01	0.0152	0.0248	0.0232	0.3604	0.0228	0.0072	0.4212	0.0676	0.0148	0.0248	0.0024	0.0056	0.0024	0.0288
0.0332	0.0024	0.0412	0.0272	0.0156	0.0004	0.02	0.004	0.0356	0.0172	0.0296	0.0128	0.002	0.0196	0.1964	0.0832	0.0036	0.0028	0.0016	0.0228	0.0196	0.0248	0.0168	0.0116	0.7444	1.4532	0.0396	0.0032	0.7444	0.006	0.0316	0.0016	0.0004	0.014	0.0148	0.0512	0.0276	0.056	0.01	0.0124	0.0004	0.0068	0.1724	0.0004	0.256	0.0192	0.3644	0.1672
0.0032	0.0132	0.0236	0.0268	0.0108	0.0208	0.028	0.1108	0.3216	0.0144	0.0836	0.0132	0.8052	0.0088	0.004	0.0356	0.118	0.0384	0.0004	0.0112	3.8356	0.0336	0.0168	0.118	0.028	0.004	0.03	0.0004	0.0284	0.4032	0.1216	0.0304	0.0116	0.0144	0.0204	0.006	0.0096	0.0464	0.002	0.018	0.0004	0.354	1.334	0.0112	0.046	0.0084	0.0112	0.544
0.002	0.0096	0.0376	0.0188	0.0004	0.2028	0.0008	0.0336	0.0076	0.0812	1.2344	0.0004	0.01	0.0168	0.1572	0.032	0.028	0.104	0.0004	0.0164	0.0048	0.04	0.0444	0.0868	0.0036	0.0428	0.0056	0.2524	0.0036	0.0108	0.0384	0.0384	0.0076	0.0252	0.0148	0.0088	0.0132	0.0092	0.0052	0.0368	0.0044	0.0684	0.0236	0.0448	0.0532	0.2276	0.0008	0.0144
0.014	0.0008	0.0324	0.0184	0.0148	0.0224	0.0056	0.0072	0.0208	0.0248	0.1636	0.0088	0.0016	0.8516	0.2112	0.0704	0.0012	0.0096	0.0096	0.012	0.0436	0.0028	0.014	0.0068	0.0032	1.392	0.0224	0.1984	1.78	0.0556	0.0296	0.0096	0.026	0.0028	0.0092	0.0644	0.0076	0.0116	0.1224	0.0096	0.002	0.014	0.0192	0.0292	0.0128	1.428	0.0004	0.066
0.0012	0.0476	0.0028	0.1292	0.022	0.0004	0.002	0.0136	0.0368	0.0264	0.0004	0.0564	0.008	0.6768	0.044	0.0132	0.636	0.0204	0.0192	0.0824	0.002	0.0136	0.0952	0.3128	0.004	0.0104	0.2724	0.1572	0.0046	0.0004	0.0212	0.01	0.02	0.0132	0.0776	0.0052	0.0044	0.002	0.0136	0.0216	0.0344	0.0124	0.026	0.0108	0.0264	0.0032	0.0312	0.1524
0.1348	0.0356	0.0096	0.0176	0.0256	0.0224	0.032	0.0056	0.008	0.022	0.0168	0.0004	0.2792	0.028	0.0204	0.0012	0.0612	0.008	0.0196	0.0124	2.6208	0.0332	0.01	0.0056	0.1408	0.0476	1.4652	0.0004	0.1408	0.07	0.0044	0.0132	0.0044	0.0152	1.1164	0.0012	0.0324	0.0368	0.0104	0.0464	0.092	0.0244	0.4328	0.0112	0.0156	0.0084	0.0264	0.0076
0.0208	0.0044	0.0368	0.1556	0.0712	0.0004	0.1004	0.0124	0.0128	0.854	0.0044	0.006	0.0028	0.0184	0.018	0.0128	0.0004	0.0172	0.0188	0.0136	0.0064	0.0004	0.0044	0.0068	0.298	0.0012	0.0008	11.8548	0.2988	0.0016	0.0052	0.0024	0.0044	0.06	0.0072	0.0164	0.1688	0.0316	0.028	0.0148	0.8548	0.0108	0.0468	0.776	0.17	0.0368	0.5164	1.578
0.0124	0.0096	0.0364	0.0016	0.0012	0.0044	0.0152	0.008	0.0068	0.0172	0.0232	0.0064	0.526	0.0664	0.0128	0.0064	0.1008	0.0104	0.0648	0.0392	0.0068	0.0104	0.0204	0.0116	0.222	0.0072	0.052	0.0396	0.2228	0.0012	0.1076	0.026	0.008	0.0276	0.01	0.0016	0.014	0.0436	0.0124	0.018	0.022	0.0168	0.0208	0.008	0.0136	0.4448	0.0036	0.0124
0.0328	0.0184	0.0124	0.0036	0.0004	0.0256	0.0128	0.0132	0.0296	0.1512	0.0352	0.0004	0.0228	0.044	0.0096	0.0152	0.0232	0.04	0.06	0.2532	0.0768	0.0464	0.0328	0.014	0.0152	0.0228	0.006	0.2076	0.0152	0.0396	0.5576	0.0544	0.01	0.01	0.0028	0.0184	0.016	0.012	0.01	0.0152	0.016	0.0624	0.0288	0.126	0.0824	0.526	0.0092	0.012
0.022	0.0168	0.0308	0.0248	0.0536	0.2704	0.0116	0.014	0.1716	0.6032	0.0068	0.0196	0.0132	0.1376	0.0056	0.0032	0.022	0.0076	0.0172	0.0232	0.0256	0.0004	0.014	0.0136	0.0956	0.0336	0.012	0.3148	0.0956	0.0108	0.0108	0.0224	0.0008	0.054	0.0544	0.028	0.0124	0.0004	0.0128	0.0224	0.1256	0.0704	0.0052	0.0052	0.0144	0.662	0.0016	0.0172
0.0444	0.0092	0.0024	0.0388	0.0016	0.0084	0.0196	0.0124	5.4968	0.0004	0.0016	0.0004	0.002	0.012	0.0108	0.0156	0.0052	0.0088	0.0068	0.0092	0.092	0.012	0.0104	0.0024	0.0384	0.038	0.0008	0.016	1.154	0.0088	0.0056	0.002	0.0124	0.0056	0.0092	0.0264	0.0004	0.1028	0.0272	0.0768	0.0144	0.0084	0.0088	0.0212	0.2516	0.0376	0.0164	0.0184
0.0124	0.0448	0.014	0.0092	0.0148	0.0004	0.038	0.1176	0.0428	0.006	0.0192	0.042	0.0104	1.194	0.014	0.0304	0.1636	0.0144	0.0232	0.0336	0.1012	0.012	0.0188	0.0176	0.0132	0.0124	0.0072	0.0004	0.0132	0.0576	0.0216	0.0288	0.0084	0.0104	0.022	0.0084	0.002	0.0368	0.0616	0.0236	0.55	0.0428	0.0024	0.0168	0.02	0.0476	0.0004	0.2764
0.0116	0.0024	0.0152	0.0116	0.0072	0.0008	0.018	0.0276	0.0032	0.0008	0.0532	0.0016	0.0132	0.0224	0.0104	0.004	0.0108	0.0076	0.0032	0.0276	0.0108	0.01	0.0152	0.0172	5.0596	0.0076	0.3252	0.0012	5.0596	0.0504	0.0004	0.0896	0.004	0.0032	0.0736	0.024	0.0392	0.0008	0.0108	0.0464	0.1236	0.2864	0.0128	0.008	0.0524	0.192	0.0256	0.0172
0.0108	0.024	0.0052	0.012	0.0212	0.482	0.0132	0.01	0.3168	0.0176	0.0096	0.0328	0.0004	0.0448	0.1272	0.0852	0.024	0.0408	0.0104	0.6224	0.0048	0.0004	0.014	0.0088	0.0332	0.02	0.0168	2.1148	0.0332	0.4108	0.036	1.8536	0.0128	0.0236	0.0188	0.0228	0.0096	0.014	0.0384	0.0112	0.0956	0.0992	0.0268	0.0076	0.0012	0.0068	0.9732	0.066
0.0188	0.0004	0.01	0.014	0.0508	0.0416	0.01	0.0144	1.0228	0.0352	0.002	0.0328	0.032	0.048	0.0152	0.0116	0.0212	0.0108	0.0248	0.002	0.0464	0.0148	0.006	0.022	1.3464	0.0004	0.0148	0.0564	0.004	0.0144	0.0248	0.0184	0.0108	0.0032	0.01	0.0064	0.0156	0.0168	0.0576	0.0296	0.0008	0.034	0.0056	0.1432	0.0012	2.1556	0.0244	0.006
0.0432	0.0004	0.0144	0.0428	0.0148	0.0004	0.0136	0.0144	0.0052	0.8032	0.0076	0.0536	0.0592	0.1092	0.0632	0.1336	0.0476	0.0136	0.0064	0.0148	0.0336	1.3596	0.0392	0.0172	0.1712	0.0836	0.0024	0.0168	0.1712	0.054	0.3072	0.0128	0.0116	0.0008	0.0036	0.014	0.1724	0.0348	0.0144	0.0108	0.9172	0.1028	0.1072	7.372	0.0256	0.1076	0.0024	0.096
0.0016	0.0072	0.0056	0.0448	0.0008	0.01	0.0216	0.0128	0.0084	0.3284	0.0044	0.1756	0.0088	0.0072	0.3	0.1508	0.3596	0.324	0.0184	0.0212	0.2508	0.0136	0.0356	0.0096	0.01	0.026	0.008	0.0176	0.0152	0.02	0.0112	0.0712	0.0236	0.0088	0.0164	0.0044	0.0156	0.1728	0.0188	0.0104	1.6508	0.0296	0.2776	0.0124	0.0012	0.642	0.0204	0.0016
0.0072	0.0004	0.0084	0.03	0.3452	0.0208	0.0216	0.0136	0.0376	0.0056	0.07	0.0492	0.0204	0.1688	0.0064	0.0376	0.054	0.0032	0.016	0.026	0.016	0.004	0.0036	0.0124	0.0288	0.0232	0.0172	0.1484	0.0288	0.0264	0.1688	0.0376	0.0024	0.0076	0.0076	0.0104	0.0212	0.0628	0.0668	0.0632	0.0708	0.2684	0.0884	0.1	0.016	0.0312	0.0324	0.0308
0.056	0.0512	0.01	0.0012	0.0456	0.0396	0.268	0.0212	0.026	0.074	0.0256	0.0272	0.0272	0.0048	0.0032	0.1388	0.002	0.02	0.0024	0.01	0.0048	0.0224	0.012	0.0124	0.9304	0.0108	0.0096	0.0012	0.48	3.3076	0.0204	0.0132	0.022	0.0128	0.0372	0.018	0.012	0.016	0.0336	0.0216	0.9156	0.1164	0.1092	0.0008	0.0104	0.354	0.1088	0.02
0.0096	0.0084	0.116	0.0004	0.01	0.0204	0.012	0.0408	4.9768	0.4976	0.04	0.0912	0.0044	0.0608	0.0136	0.0228	0.0004	0.1076	0.0044	0.01	0.0548	0.01	0.0388	0.0224	0.01	0.012	0.0008	0.0416	0.0192	1.0912	0.1416	0.0632	0.0304	0.0212	0.0124	0.01	0.0056	0.122	0.0088	0.012	0.5116	0.0384	0.1848	0.0492	0.0288	0.0096	0.2304	0.02
0.0076	0.0016	0.1248	0.0004	2.5244	0.0128	0.0128	0.0148	0.06	0.6396	0.0116	0.004	0.0008	0.008	0.0096	0.0216	0.0004	0.1276	0.0032	0.0196	0.1212	0.0512	0.008	0.0112	0.0428	0.0352	0.3048	1.304	0.0428	0.0008	0.0308	0.0008	0.0108	0.0032	0.0004	0.0208	0.1984	0.0008	0.006	0.0108	0.1292	0.0076	0.424	0.0084	0.01	0.0044	0.0136	0.0216
0.0048	0.0076	0.0248	0.0004	0.0244	0.1752	0.2184	0.0104	0.0116	0.0032	0.014	0.0084	0.0152	0.0064	0.014	0.012	0.7672	0.0892	0.0344	0.0108	0.018	0.0132	0.012	0.0156	0.786	0.3784	0.0292	0.1932	0.01	0.008	0.0124	0.0472	0.012	0.0004	0.014	0.0092	0.0256	0.0968	0.0388	0.01	0.2716	0.0356	0.048	0.1888	0.0272	0.0252	0.0104	0.0276
0.0012	0.0264	0.0124	0.0048	0.0248	0.036	0.0132	0.0124	0.01	0.268	0.0248	0.0472	0.3952	0.14	0.0064	0.0148	0.0052	0.03	0.0084	0.0608	0.0428	0.0208	0.0404	0.0124	0.2068	0.0072	0.0016	0.0072	0.2068	0.1456	0.0088	0.1252	0.0528	0.0376	0.0008	0.0008	0.0096	0.0128	0.0472	0.1108	0.0512	0.144	0.0024	0.0024	0.004	0.1744	0.0224	0.0348
0.0976	0.0016	0.0068	0.0036	0.0108	0.0176	0.0148	0.0044	0.0208	0.0192	0.0768	0.0032	0.478	0.014	0.2148	0.0164	0.1044	0.012	0.0004	0.01	0.0276	0.0108	0.0432	0.0348	0.008	0.0048	0.0616	0.0028	0.0088	0.0132	0.0704	0.0004	0.0056	0.0068	0.012	0.0156	0.0144	0.0032	0.0052	0.0164	0.0488	0.0124	0.5352	0.3108	0.0004	0.0092	0.0492	0.0112
0.0376	0.0748	0.1024	0.012	0.2108	0.0172	0.0112	0.016	0.012	0.0028	0.0552	0.012	0.0092	0.0016	0.0036	0.0104	0.0264	0.0016	0.0236	0.0176	0.0076	0.0112	0.0604	0.0068	0.006	0.0632	0.0416	0.5496	0.0064	5.2212	0.0408	0.0628	0.2748	0.0152	0.0104	0.01	0.0064	0.198	0.0172	0.0768	0.0132	0.0404	1.1672	0.1884	4.7288	0.0092	0.0004	0.0028
0.0012	0.0352	0.0168	0.0212	0.0484	0.0192	0.0228	0.008	0.0476	0.054	0.3804	0.0084	0.0092	0.0044	0.2292	0.012	0.1144	0.008	0.02	0.0008	0.0904	0.0248	0.0036	0.03	0.0272	0.0008	0.0436	1.2508	0.0272	0.0192	0.0336	0.0176	0.0204	0.012	0.0124	0.0144	0.012	0.1488	0.0124	0.0104	0.0668	0.0368	0.0844	0.0068	0.0004	0.034	1.1736	0.1716
0.0228	0.0132	0.034	0.0268	0.0088	0.0248	0.0268	0.0144	0.0372	0.174	0.0048	0.0004	0.0276	0.0172	0.0012	0.0112	0.0108	0.0176	0.0988	0.0476	0.01	0.01	0.01	0.0212	0.0028	0.0032	0.3848	0.114	0.0028	0.124	0.0628	0.0028	0.0132	0.0172	0.0184	0.0164	0.0052	0.0116	0.0096	0.0096	0.0008	0.012	0.0084	0.0164	0.0016	0.0512	0.0076	0.0092
0.0272	0.024	0.0108	0.1052	0.0176	0.0132	0.0152	0.0136	0.0212	0.0656	0.0956	0.0076	0.018	0.0044	0.0104	0.0004	0.0056	0.0044	0.0192	1.0504	0.016	0.01	0.0144	0.004	2.994	0.072	0.0016	0.0004	2.994	1.4008	0.0028	0.024	0.0088	0.0124	0.0124	0.0312	0.0152	0.0136	0.0128	0.0112	0.8392	0.0032	0.0124	0.0032	0.9076	0.0012	0.004	0.0252
0.0592	0.0176	0.0284	0.0004	0.0096	0.1068	0.104	0.0156	10.9768	0.1308	0.9072	0.0016	0.0152	0.0268	0.0092	0.012	0.0172	0.0228	0.0148	0.0036	0.0012	0.0036	0.0148	0.0216	0.2604	0.0048	0.1012	0.0644	0.2604	0.0188	0.0412	0.1116	0.0148	0.0424	0.0096	0.0112	0.0128	0.0008	0.0588	0.0228	0.1404	0.0684	0.0012	2.2928	1.254	0.6664	0.0048	0.008
0.0084	0.0216	0.0016	0.0228	0.0648	0.0124	0.0176	0.0272	0.0396	0.0576	0.0068	0.0004	0.0608	0.0088	0.0136	0.0172	0.0088	0.0164	0.0068	0.0092	0.0272	0.0456	0.0308	0.218	0.0184	0.0504	0.0152	0.0032	0.0184	0.0064	0.0252	0.0328	0.0048	0.0256	0.0108	0.0136	0.1148	0.0152	0.0428	0.018	0.0024	0.0256	0.0416	0.008	0.0132	0.082	0.0328	0.0548
0.0208	0.0156	0.0124	0.01	0.03	0.01	0.0176	0.0116	1.7944	0.4876	0.006	0.0024	0.0008	0.0864	0.002	0.0124	0.0088	0.3688	0.0284	0.0004	0.0128	0.0168	0.014	0.012	0.0136	0.0004	0.0164	0.3508	0.0136	0.0256	0.1112	0.0012	0.056	0.5156	0.018	0.0124	0.0172	0.016	0.0156	0.0556	0.006	0.0088	0.216	0.0004	4.2484	0.0164	0.0052	0.0244
0.0572	0.0004	0.0008	0.1404	0.0068	0.1072	0.0236	0.02	0.7304	0.0384	0.0108	0.0004	0.072	0.014	0.0204	0.01	0.0124	0.1444	0.0152	0.0668	0.048	0.0052	0.0148	0.0144	0.0084	0.0008	0.0092	0.0252	0.0084	0.0532	0.0152	0.0984	0.0132	0.012	0.012	0.0416	0.0096	0.0448	0.0284	0.0124	0.0168	0.0112	0.0176	0.6632	0.3144	0.002	0.0168	0.0124
0.0104	0.0716	0.0168	0.0072	0.2852	0.0072	0.0132	0.0136	0.0016	0.0012	0.0048	0.0008	0.0016	0.0044	1.324	0.002	0.0264	0.0732	0.2256	0.0208	0.028	0.018	0.0068	0.284	0.0604	0.1544	0.3208	0.1948	0.0604	0.0216	0.022	0.0112	0.0144	0.1828	0.0076	0.0708	0.0192	0.0004	0.0124	0.0184	0.336	0.0788	0.0556	0.0004	0.0032	0.0824	0.0128	0.0128
0.008	0.1244	0.0232	0.0184	0.0156	0.0196	0.146	0.0192	0.028	0.086	0.0288	0.004	0.0136	0.0332	0.044	0.146	0.0788	0.0004	2.5164	0.0616	0.0212	0.01	0.0344	0.0204	0.0688	0.0084	1.8684	0.0268	0.0688	0.0016	0.0196	0.0016	0.0156	0.0212	0.0132	0.0112	0.0012	0.0184	0.0156	0.0128	0.048	0.176	0.0868	0.038	0.0344	0.4396	2.2452	0.0124
0.1068	0.0016	0.0136	0.0368	0.0208	0.0216	0.0216	0.0128	0.0432	0.1632	0.0164	0.0004	0.0008	0.004	0.0204	0.214	0.0148	0.0376	0.002	0.0476	0.0424	0.084	0.0152	0.0156	0.7044	0.0084	0.0376	0.0224	0.7044	0.402	0.01	0.0312	0.0204	0.0128	0.0068	0.016	0.024	0.0144	0.01	0.0836	0.1888	0.0216	2.6764	0.046	2.912	0.0188	0.12	0.0352
0.0176	0.1568	0.01	0.0008	0.0012	0.096	0.0352	0.0104	0.0592	0.058	0.1976	0.01	0.0116	0.224	0.0036	0.0124	0.2424	0.0168	0.0108	0.0076	0.0216	0.136	0.0208	0.0224	0.016	0.07	0.0528	0.142	0.0168	0.1372	0.0584	0.0144	0.0084	0.0052	0.01	0.0244	0.0108	0.0024	0.0196	0.0184	0.0476	0.0368	0.0168	0.006	0.0528	0.0056	0.0048	0.0432
0.0128	0.0576	0.0216	0.0204	0.004	0.0616	0.0208	0.0148	0.0064	0.1204	0.0164	0.01	0.0628	0.0096	0.1376	0.0388	1.1872	0.004	0.0056	0.016	0.0256	0.0548	0.0128	0.0116	0.3052	0.0068	0.0156	0.004	0.3052	0.0116	0.002	0.0516	0.1456	0.0068	0.01	0.0088	0.0188	0.0552	0.0096	0.006	0.0004	0.0512	0.0316	0.0184	0.38	0.0204	0.0092	0.0168
0.098	0.1332	0.032	0.0212	0.002	0.0016	0.0168	0.01	0.0396	0.0144	0.002	0.0096	0.0824	0.0244	0.0028	0.0392	0.0004	0.0072	0.0416	0.0556	0.0128	0.1372	0.012	0.0504	0.0996	0.2436	0.346	1.0944	0.0996	0.0128	0.0184	0.7384	0.0148	0.0044	0.0176	0.0164	0.0128	0.0144	0.0112	0.0084	0.0056	0.002	0.0872	0.0356	3.1044	0.1676	0.01	0.0028
0.0104	0.0236	0.0124	0.0132	0.0696	0.0424	0.0096	0.01	0.196	0.012	0.0468	0.0104	0.0004	0.0836	0.5148	0.012	0.0384	0.0024	0.104	0.0312	0.0012	0.0116	0.0116	0.0188	0.1212	0.0012	0.516	0.0036	0.1212	0.0596	0.1776	0.2388	0.0048	0.0088	0.0572	0.0008	0.062	0.0288	0.0264	0.048	0.1296	0.0152	0.0472	0.0292	0.286	0.0268	0.0224	0.0336
0.03	0.0988	0.0076	0.0088	0.024	0.0128	0.0204	0.012	0.012	2.534	0.004	0.0064	0.0064	0.156	0.0128	0.0528	0.0072	0.0144	0.0232	0.012	0.0272	0.0136	0.0184	0.0236	0.0324	0.0008	0.0076	0.0008	0.0324	0.014	0.036	0.0124	0.01	0.0052	0.0148	0.0108	0.0324	0.0088	0.0132	0.1024	0.0016	0.0088	0.024	0.0616	0.1456	0.1952	0.0184	0.0176
0.0348	0.0792	0.008	0.006	0.0128	0.0044	0.0216	0.0132	0.1884	0.3296	0.0408	0.0044	0.0124	0.0124	0.0004	0.0104	0.0004	0.0216	0.0104	0.0112	0.0344	0.0092	0.0456	0.0136	0.3944	0.0092	0.0776	0.1684	0.3944	0.0952	0.0132	0.3996	0.018	0.0128	0.0236	0.0116	0.0464	0.0164	0.0112	0.0204	0.0096	0.0712	0.0412	0.0216	0.0108	0.222	0.0144	0.0348
0.0024	0.0004	0.0156	0.0172	0.0108	0.0124	0.052	0.0212	0.0316	0.0036	0.006	0.0512	0.0284	0.0144	0.0128	0.0776	0.008	0.0208	0.0156	0.0016	0.096	0.0236	0.0188	0.0064	0.6972	0.1256	0.0832	0.1688	0.008	0.0168	0.1008	0.1904	0.0032	0.024	0.014	0.1428	0.0268	0.0152	0.0484	0.0136	0.01	0.0044	0.0056	0.0124	0.1832	0.204	0.0192	0.0452
0.0312	0.0128	0.042	0.0012	0.0052	0.0324	0.0192	0.0176	0.236	0.006	0.0112	0.0352	0.0496	0.3972	2.9744	0.0052	0.1636	0.5172	0.0216	0.0288	0.002	0.0108	0.0136	0.0392	0.7336	0.0036	0.0008	0.0156	0.7336	0.0588	0.0284	0.0144	0.1032	0.0104	0.01	0.0152	0.0092	0.048	0.0004	0.0344	0.0156	0.0148	0.0004	0.1364	0.058	0.0072	0.0708	0.2536
0.0228	0.0196	0.004	0.0288	0.42	0.0072	0.012	0.0096	0.0108	0.028	1.294	0.0172	0.0284	0.8748	0.0028	0.006	0.0032	0.0012	0.0484	0.0068	0.0108	0.0348	0.0216	0.062	0.4344	0.1	0.0004	0.1336	0.4344	0.762	0.0248	0.0072	0.1076	0.0308	0.0032	0.0056	0.0176	0.0376	0.002	0.0132	0.016	0.0112	0.0632	0.0028	0.5892	3.1976	0.0288	0.0328
0.0408	0.0212	0.0168	0.0272	0.0484	0.084	0.0156	0.0336	0.5452	0.2056	0.0712	0.0724	0.0024	0.0028	0.01	0.0128	0.0152	0.0008	0.046	0.0108	0.0096	0.012	0.01	0.0372	0.0004	0.0668	0.4088	0.3404	0.0004	0.0176	0.004	0.0624	0.0176	0.02	0.0008	0.018	0.0576	0.0268	0.1712	0.014	0.0156	0.0268	0.0012	0.0204	0.012	2.346	0.0156	0.012
0.0004	0.1428	0.0216	0.01	0.022	0.642	0.0128	0.0116	0.0208	0.0664	0.004	0.0796	0.0404	0.0444	0.014	0.012	0.0224	0.052	0.0036	0.0132	0.0188	0.024	0.0184	0.0264	0.0036	0.0084	0.6828	0.0088	0.0036	0.6124	0.0064	0.0128	0.0124	0.01	0.1504	0.0228	0.0128	0.0508	0.0052	0.01	0.066	0.0068	0.0016	0.2976	0.0376	0.1224	0.25	1.9256
0.0172	0.0208	0.0888	0.0216	0.0412	0.176	0.0132	0.0176	0.0692	0.0176	0.0132	0.0004	0.0144	0.0116	0.0192	0.0468	0.074	0.0088	0.0116	0.008	0.0104	0.016	0.0156	0.0188	0.4768	0.0768	0.4904	0.0116	0.4768	0.008	0.026	0.0044	0.1228	0.0512	0.0108	0.0148	0.062	0.0092	0.0136	0.0188	0.18	0.0628	0.0196	0.0052	0.0252	0.1224	0.0344	0.024
0.0024	0.024	0.0176	0.0216	0.0056	0.166	0.0032	0.008	0.1148	0.0776	0.014	0.0356	0.0068	0.1564	0.0392	0.0164	0.0068	0.0024	0.0584	0.012	0.0956	0.0028	0.014	0.0604	2.396	0.0628	0.4608	0.018	2.396	0.0464	0.1644	0.0004	0.0832	0.014	0.0044	0.0116	0.026	0.07	0.0064	0.048	0.4164	0.0208	0.0904	0.0056	0.0128	0.0452	0.1592	0.0188
0.0412	0.008	0.0016	0.006	0.0288	0.0704	0.0256	0.0116	0.0312	0.0036	0.0252	0.0024	0.0244	0.0016	0.0372	0.01	0.0408	0.016	0.0528	0.0108	0.0196	0.0108	0.0124	0.0176	0.0048	0.5796	0.0068	2.1772	0.0048	0.1828	0.0524	0.2564	0.0224	0.076	0.0132	0.0376	0.0288	0.0144	0.0796	0.0316	0.0128	0.0784	0.0036	0.7944	0.3956	0.0052	1.6128	0.0072
0.012	0.1404	0.004	0.0196	0.0292	0.0264	0.0144	0.0144	0.0108	0.0168	0.0032	0.0952	0.036	0.0288	0.4768	0.0832	0.022	0.0124	0.0064	0.0096	0.0132	0.014	0.0116	0.0064	0.1248	0.1532	0.0496	0.1116	0.1248	0.3152	0.0036	0.0308	0.0152	0.036	0.0628	0.0396	0.0396	0.028	0.0116	0.0144	0.03	0.03	0.0168	0.0016	0.0004	0.0184	0.4472	0.0172
0.012	0.1112	0.0148	0.0204	0.0084	0.0336	0.0128	0.0128	0.1364	0.0016	0.0104	0.0096	0.0076	0.3228	0.0128	0.0104	0.22	0.0096	0.0336	0.0208	0.0084	0.0244	0.0268	0.008	0.03	0.0012	0.034	0.0148	0.0356	0.0684	0.032	0.0024	0.004	0.0156	0.1376	0.0072	0.0124	0.0032	0.008	0.0128	0.022	0.1412	0.0004	0.0008	0.0052	0.002	0.0028	0.0228
0.006	0.034	0.0276	0.0036	0.0488	0.0592	0.0188	0.0136	0.0712	0.0052	0.052	0.0228	0.0132	0.138	0.0316	0.0068	0.0216	0.0072	0.0808	0.0272	0.0132	0.01	0.0432	0.0332	0.3196	0.0232	0.002	0.208	0.1	0.0204	0.004	0.0144	0.0272	0.0136	0.0096	0.0272	0.0152	0.0684	0.0148	0.0152	0.582	0.266	0.0012	0.014	0.0212	0.3536	0.1936	0.0216
0.022	0.0268	0.014	0.0052	0.01	0.0128	0.0128	0.01	0.1572	0.0004	0.0136	0.0064	0.0244	0.0008	0.1028	0.016	0.0272	0.0312	0.0108	0.0044	0.0152	0.022	0.0116	0.0348	0.0104	0.1492	0.0008	0.434	0.0104	0.2004	0.0004	0.0216	0.0168	0.0372	0.0116	0.0032	0.0004	0.0328	0.0128	0.1256	0.1872	0.0048	0.2468	0.1344	0.022	0.0496	0.0104	0.0328
0.1768	0.0112	0.0084	0.024	0.0144	0.0088	0.3288	0.0672	0.0016	0.0188	0.0132	0.0128	0.016	0.1216	0.0164	0.026	0.0048	0.0104	0.0124	0.0016	0.0256	0.0208	0.0172	0.0552	0.0012	0.0264	0.0048	0.0004	0.0012	0.0308	0.0044	0.0072	0.0124	0.0052	0.0004	0.03	0.0204	0.0252	0.016	0.018	1.2776	0.2172	0.014	0.0072	0.0276	0.0408	0.0016	0.0076
0.0004	0.0092	0.0088	0.0024	0.0108	0.0432	0.01	0.0192	0.0372	0.0468	0.0048	0.0056	0.008	0.0608	0.0356	0.0416	0.0844	0.394	0.0252	0.0224	0.0108	0.0456	0.0076	0.0692	0.0252	0.0036	0.0008	0.004	0.056	0.0288	0.01	0.0072	0.012	0.0008	0.0184	0.01	0.0012	0.0008	0.0248	0.1096	0.0188	0.0056	0.09	0.0024	0.0376	0.1328	0.0564	0.0124
0.0268	0.0212	0.002	0.0012	0.0204	0.0876	0.0144	0.0128	0.2856	0.348	0.0904	0.0024	0.0104	0.0492	0.0032	0.0136	0.01	0.0212	0.0132	0.0092	0.02	0.0056	0.0116	0.0036	0.0432	0.0468	0.0004	0.0068	0.004	0.01	0.0032	0.0024	0.0228	0.0352	0.0148	0.0368	0.0108	0.0292	0.054	0.0132	0.0792	0.0036	0.0672	0.0024	1.1164	0.1084	0.0912	0.0028
0.0076	0.0004	0.0192	0.0728	0.0052	0.0128	0.014	0.0124	0.0068	0.0276	0.0056	0.0196	0.0004	0.0004	0.0028	0.002	0.3608	0.03	0.0144	0.0232	0.1136	0.0108	0.0124	0.0068	0.3064	0.0104	0.0284	0.0052	0.554	0.7684	0.002	0.006	0.008	0.0076	0.0012	0.088	0.012	0.074	0.01	0.0188	0.0592	0.0332	0.0256	0.1004	0.0088	0.058	0.0128	0.0172
0.0084	0.0932	0.0328	0.0056	0.012	0.0116	0.0156	0.0164	0.0196	0.0456	0.022	0.006	0.0084	0.088	0.0128	0.0184	0.0224	0.0148	0.0048	0.0092	0.016	0.0064	0.0132	0.0136	0.0228	0.0084	0.03	0.0288	0.0228	0.204	0.106	0.238	0.1844	0.0084	0.0116	0.012	0.0052	0.2344	0.2048	0.0348	0.0008	0.012	0.0544	0.0064	0.1784	0.0272	0.0036	0.0024
0.0084	0.0104	0.0072	0.0488	0.0632	0.004	0.0128	0.0308	0.028	0.0356	0.3692	0.0096	0.0008	0.0188	0.026	0.0396	0.1868	0.0408	0.0088	0.0508	0.0192	0.0124	0.01	0.0104	1.87	0.0308	0.0624	0.102	1.876	0.044	0.0848	0.0132	0.0152	0.0004	0.0048	0.0124	0.008	0.0216	0.0056	0.0272	0.0376	0.02	0.0732	0.0288	0.0084	0.0348	0.076	0.0152
0.0152	0.0104	0.0124	0.0104	0.0248	0.0008	0.0204	0.01	0.0056	0.042	0.0164	0.0168	0.0724	0.0124	0.0208	0.026	0.018	0.0004	0.0172	0.054	0.0188	0.0104	0.0132	0.0064	0.02	0.1092	0.0608	0.0168	0.026	0.0468	0.004	0.01	0.0704	0.016	0.0212	0.1052	0.0096	0.0404	0.0116	0.0892	0.002	0.0096	0.0052	0.0336	0.3452	0.3316	1.0572	0.1912
0.0004	0.1728	0.0068	0.0112	0.0116	0.0004	0.0072	0.0124	0.0372	0.0028	0.0128	0.0044	0.0928	0.0388	0.0132	0.0776	0.138	0.0068	0.0108	0.1928	0.8012	0.0128	0.282	0.0376	0.03	0.012	0.0344	0.0032	0.0352	0.0224	0.1088	0.0272	0.12	0.0524	0.0208	0.018	0.0088	0.0304	0.0144	0.0268	0.0012	0.0268	0.0072	0.0024	0.1996	0.0004	0.0228	0.012
0.0088	0.004	0.0184	0.0056	0.0024	0.1444	0.01	0.0292	0.026	0.0988	0.0392	0.6432	0.0036	1.0192	0.0344	0.014	0.0656	0.0096	0.0288	0.0664	0.0144	0.0284	0.0412	0.0216	0.0732	0.926	0.014	0.0024	0.008	0.3572	0.0064	0.0008	0.0064	0.0228	0.01	0.0024	0.0144	0.0164	0.0008	0.0112	1.926	0.0108	0.6776	0.0632	0.0148	0.0372	1.0008	0.7248
0.006	0.036	0.0068	0.0672	0.0332	0.054	0.0092	0.0448	0.0404	0.026	0.0068	0.0204	0.0692	0.0116	0.034	0.01	0.004	0.0832	0.0664	0.042	0.0052	0.0184	0.014	0.014	0.09	0.0608	0.0532	0.0032	0.0916	0.0196	0.0004	0.0612	0.024	0.0116	0.0248	0.0172	0.0044	0.0032	0.0104	0.0024	5.3264	0.01	0.002	0.026	0.0236	0.0804	0.006	0.0144
0.0032	0.0108	0.0128	0.018	0.04	0.002	0.0212	0.014	0.1016	0.23	0.1028	0.0012	1.062	0.0184	0.0168	0.0148	0.0008	0.0068	0.0032	0.0136	0.014	0.0048	0.0124	0.0352	0.8216	0.0208	0.0596	1.7356	0.8216	0.2416	0.0116	0.0404	0.036	0.0376	0.0656	0.0032	0.03	0.074	0.1192	0.0032	0.8392	0.0004	0.0032	0.0024	2.1044	0.0032	0.012	0.002
0.0396	0.002	0.0312	0.0124	0.0104	0.0156	0.0272	0.012	10.9488	0.0836	0.1104	0.0236	0.008	0.0004	0.0096	0.0128	0.0172	0.3012	0.0112	0.0048	0.0044	0.0204	0.01	0.0116	0.1176	0.04	0.0752	0.008	0.1176	0.1168	0.0056	0.0096	0.0096	0.0168	0.0168	0.0124	0.0032	0.0032	0.0172	0.0092	0.0004	0.0536	0.0004	0.1412	0.118	0.2408	0.0028	0.024
0.186	0.0044	0.01	0.048	0.0124	0.0152	0.0132	0.0128	0.0164	0.3116	0.0304	0.014	0.0124	0.0164	0.0324	0.6556	0.1888	0.0108	0.0132	0.0072	0.012	0.0104	0.022	0.0164	0.1972	0.0304	0.1168	0.0136	0.1972	0.004	0.0296	0.0068	0.0148	0.0072	0.0316	0.0148	0.0168	0.0104	0.0216	0.2048	0.0184	0.0156	0.1876	0.0504	0.0028	0.0236	0.0424	0.0328
0.5456	0.0604	0.012	0.0152	0.046	0.0132	0.01	0.0168	0.0032	0.0228	0.002	0.0116	0.0012	0.0012	0.0208	0.0064	0.0956	0.0116	0.0156	0.012	0.0112	0.038	0.0092	0.012	0.218	0.0056	0.0648	0.0424	0.2184	0.0352	0.0036	0.0024	0.1308	0.01	0.024	0.0036	0.0056	0.17	0.0024	0.0584	0.016	0.0108	0.1588	0.0276	0.0056	0.7864	0.0276	0.0116
0.052	0.1136	0.0028	0.018	0.006	0.026	0.074	0.0128	0.0176	0.0232	0.0752	0.0192	0.0348	0.018	0.014	0.0252	0.0364	0.0312	0.0092	0.0864	0.0036	0.0196	0.0132	0.0128	0.26	0.0112	0.006	0.0072	0.266	1.068	0.0236	0.1416	0.0112	0.0004	0.0144	0.0308	0.0016	0.006	0.0136	0.0132	0.004	0.0256	0.0028	0.0032	0.0088	0.0412	0.0008	0.0032
0.0052	0.0056	0.0444	0.0004	0.0612	0.0456	0.0136	0.0168	0.0036	0.0016	0.0492	0.044	0.8456	0.0036	0.0684	0.01	0.024	0.0744	0.018	0.0964	0.2492	0.0096	0.01	0.0244	0.0032	0.01	0.006	3.2312	0.0032	0.3236	0.4416	0.0016	0.3056	0.014	0.0612	0.0012	0.03	0.0196	0.0156	0.0036	0.0148	0.0408	0.246	0.0292	0.0224	0.0004	1.7944	0.0176
0.4232	0.0056	0.0036	0.0144	0.0092	0.0108	0.0252	0.0168	1.8928	0.0956	0.3392	0.0448	0.0028	0.332	0.0088	0.0124	0.1244	0.0536	0.1068	0.0032	0.2708	0.0152	0.0056	0.0608	0.0092	0.0024	0.0076	0.0196	0.0092	0.0528	0.0272	0.0108	0.012	0.0128	0.032	0.0196	0.0088	0.0084	0.0192	0.0156	0.0852	0.06	0.0132	0.1576	0.0024	0.2868	0.018	0.0208
0.0692	0.0064	0.014	0.0212	0.004	0.0148	0.0396	0.0184	0.0256	1.0152	0.05	0.0292	0.0016	0.0192	0.0264	0.012	0.2584	0.0036	0.0172	0.0076	0.012	0.0228	0.0252	0.0472	0.0256	0.004	0.0304	0.062	0.014	0.0088	0.0132	0.0156	0.0012	0.0188	0.0092	0.0304	0.02	0.0096	0.0064	0.0132	0.0132	0.2736	0.1164	0.0004	0.0696	0.0016	0.2236	0.0192
0.0012	0.0084	0.0128	0.0104	0.024	0.0084	0.0244	0.022	0.0132	0.0116	0.1096	0.756	0.5288	0.5472	0.01	0.0232	0.0144	0.0124	0.3188	0.012	0.006	0.078	0.0004	0.014	0.1216	0.0072	0.0136	0.0044	0.1216	0.0976	0.0112	0.0008	0.0068	0.0056	0.0168	0.0284	0.0172	0.0256	0.0264	0.118	0.0024	0.0208	0.0004	0.0052	0.0044	0.4564	0.0044	0.0364
0.058	0.0156	0.2876	0.0156	0.008	0.0036	0.0888	0.0144	0.0028	0.1512	0.0628	0.0372	0.3544	0.0064	0.01	0.0688	0.062	0.0384	0.0124	0.0328	0.036	0.0192	0.0128	0.0068	0.072	0.3704	0.0564	0.0028	0.0726	0.002	0.1244	0.0204	0.054	0.0088	0.0596	0.0244	0.0384	0.1748	0.0328	0.006	0.0876	0.6728	0.316	0.0004	3.9692	0.0004	0.0084	0.012
0.0132	0.0012	0.0136	0.0156	0.0128	0.052	0.0056	0.0124	0.0036	0.0612	0.0128	0.0176	0.0136	0.2788	0.0072	0.0272	0.0304	0.0156	0.0504	0.0004	0.018	0.0028	0.0136	0.0252	0.0684	0.0004	0.1036	1.0816	0.0684	0.0004	1.468	0.0852	0.0196	0.0108	0.0168	0.014	0.026	0.04	0.0156	0.032	0.02	0.0108	0.0136	0.0172	0.0832	0.052	0.2504	0.0732
0.0116	0.0128	0.0168	0.0188	0.0112	0.2612	0.0132	0.0124	0.0056	0.0208	0.0076	0.0352	0.0156	0.18	0.0144	0.0144	0.0076	0.3492	0.3048	0.0004	0.0284	0.0416	0.0116	0.0156	0.0052	0.0164	0.09	0.0464	0.0052	0.102	0.0568	0.0644	0.0036	0.0056	0.4408	0.0012	0.0168	0.016	0.068	0.02	0.0096	0.052	0.0048	0.2788	0.44	0.1564	0.0148	0.0872
0.0044	0.102	0.0048	0.244	0.0012	0.1408	0.0436	0.0164	0.0252	0.0156	0.0184	0.0156	0.014	0.006	0.0004	0.016	0.0216	0.0072	0.0096	0.0048	0.0024	0.1028	0.0148	0.0268	0.0156	0.0924	0.0224	0.8076	0.0156	0.036	0.0228	0.0072	0.0112	0.0136	0.0216	0.006	0.0096	0.0112	0.0156	0.0192	0.008	0.22	0.024	0.004	0.008	0.0004	0.0196	0.038
0.0044	0.0224	0.006	0.1364	0.4992	0.02	0.0104	0.038	0.9444	0.5764	0.0432	0.0144	0.0004	0.0004	0.0188	0.0116	0.0216	0.012	0.0308	0.1416	0.0056	0.004	0.012	0.0124	0.0036	0.002	0.0112	0.006	0.022	0.438	0.0028	0.0172	0.0072	0.0412	0.0196	0.0128	0.004	0.0036	0.0112	0.0152	0.0328	0.0488	0.0376	1.4784	0.0048	0.0996	0.0028	0.0124
0.0128	0.012	0.0184	0.0132	0.0016	0.0008	0.0156	0.0128	0.2444	0.8764	0.004	0.0676	0.0204	0.0332	0.0656	0.0308	0.0508	0.016	0.0068	0.0596	0.0208	0.004	0.0176	0.0708	0.002	0.0336	3.3132	0.0292	0.0024	0.0316	0.0004	0.7268	0.0016	0.036	0.0116	0.0008	0.0016	0.01	0.0056	0.0184	0.3816	0.0032	0.0348	0.0556	0.03	0.0084	1.7164	0.0268
0.002	0.0764	0.0156	0.0252	0.0008	0.1384	0.0044	0.0192	0.0212	0.064	0.0408	0.076	0.0228	0.0028	0.004	0.03	0.0016	0.0248	0.0036	0.9772	0.0012	0.0148	0.0104	0.038	0.0152	0.0076	0.0088	2.7952	0.0152	0.026	0.0184	0.3248	0.0328	0.0272	0.0088	0.012	0.042	0.0116	0.0156	0.0136	0.0576	0.0012	0.3524	0.0656	0.0448	6.6228	0.0004	0.0124
0.0152	0.0136	0.026	0.006	0.0016	0.06	0.016	0.0128	3.3864	0.0052	0.0356	0.0024	0.192	0.0408	0.0152	0.0364	0.018	0.0024	0.166	0.0672	0.0336	0.0096	0.0252	0.0092	0.1992	0.0168	0.134	0.0004	0.1992	0.0036	0.012	0.0276	0.0048	0.01	0.0028	0.0032	0.0376	0.0112	0.0224	0.0124	0.134	0.0092	0.0272	0.0104	0.0984	0.002	0.0108	0.1652
0.0028	0.0028	0.0236	0.0008	0.0088	0.0084	0.0168	0.014	0.3148	0.7904	0.0084	0.0116	0.2732	0.0032	0.0112	0.0312	0.0056	0.0052	0.0044	0.0128	0.004	0.0004	0.0248	0.022	0.432	0.0516	0.3104	0.0264	0.4328	0.0112	0.0156	0.0136	0.0004	0.0264	0.014	0.0096	0.0116	0.0036	0.0132	0.0164	0.0008	0.0296	0.0016	0.0916	0.1008	0.0436	0.0796	0.038
0.012	0.0052	0.0888	0.0172	0.0088	0.0044	0.012	0.0108	0.0004	0.0132	0.0368	0.0148	0.0412	0.0032	0.0568	0.0184	0.0052	0.0032	0.0176	0.0188	0.0288	0.0128	0.0188	0.0624	0.0008	0.054	0.0288	0.0508	0.0008	0.0116	0.0016	0.0136	0.0732	0.0792	0.0032	0.012	0.0064	0.0132	0.0632	0.0168	0.5436	0.0252	0.0668	0.0128	0.064	0.1016	0.0012	0.0124
0.0236	0.0272	0.0148	0.0016	0.006	0.0428	0.0152	0.0128	0.0092	0.2752	0.0148	0.026	0.0876	0.0068	0.0068	0.1036	0.0492	0.0004	0.0184	0.0508	0.0364	0.098	0.016	0.038	0.0044	0.0248	0.0044	0.09	0.0044	0.04	0.0028	0.0128	0.0044	0.1188	0.0076	0.0004	0.0196	0.1052	0.0112	0.0428	0.0136	0.0684	7.2224	0.0028	0.0232	0.158	0.0148	0.0192
0.0252	0.0116	0.0124	0.0008	0.194	0.0376	0.0148	0.0132	0.2536	0.1884	0.0448	0.0128	0.0096	0.0124	0.0164	0.0148	0.186	0.0036	5.6584	0.0072	0.0976	0.0096	0.002	0.0052	0.02	0.0248	0.0336	0.014	0.0216	0.0496	0.0252	0.0132	0.0168	0.0096	0.0236	0.036	0.0596	0.006	0.0144	0.0108	0.0236	0.0192	0.0248	0.1548	0.7424	0.0024	0.0004	0.022
0.0104	0.0124	0.0092	0.0012	0.2196	0.1348	0.388	0.0112	0.004	0.0184	0.0288	0.0264	0.0248	0.0936	0.012	0.012	0.024	0.0136	0.0324	0.0948	0.0268	0.0704	0.0196	0.0004	0.0972	0.1128	0.0104	0.0004	0.0972	0.052	0.0024	0.2648	0.0412	0.0012	0.01	0.0172	0.0252	0.084	0.0168	0.032	0.0576	0.0376	0.0256	0.0124	0.038	0.0364	0.0256	0.012
0.0004	0.0076	0.0096	0.0048	0.0104	0.0164	0.0736	0.0116	0.7004	0.018	0.0192	0.1124	0.508	0.018	0.0544	0.0184	0.014	0.0048	0.0072	0.012	0.032	0.0144	0.0216	0.0036	0.0872	0.0792	0.2564	0.0408	0.0872	0.044	0.0496	0.1152	0.014	0.0428	0.1728	0.0204	0.0116	0.018	0.012	0.0188	0.0764	0.0668	0.0112	0.0028	0.1756	0.2044	0.0012	0.0144
0.0012	0.0236	0.0108	0.0112	0.01	0.1168	0.0152	0.016	0.0376	0.2608	0.0084	0.336	0.034	0.0032	0.0048	0.0248	0.0056	0.05	0.0212	0.0364	0.0476	0.0512	0.0272	0.0112	0.002	0.012	0.0424	0.44	0.0024	0.22	0.0124	0.0056	0.0016	0.0036	0.0096	0.0092	0.0112	0.1872	0.1292	0.008	9.7412	0.0128	0.0244	0.0004	0.0144	0.544	0.0012	0.0004
0.0376	0.1012	0.0124	0.0272	0.0296	0.0016	0.008	0.0132	0.0004	0.0996	0.2572	0.0068	0.008	0.0008	0.0464	0.0032	0.0304	0.0336	0.0308	0.1032	0.0136	0.0108	0.0144	0.016	0.0096	0.2016	0.0292	0.5852	0.0096	0.0016	0.0136	0.002	0.0192	0.0184	0.028	0.0032	0.0156	0.0132	0.0064	0.0464	0.0292	0.0056	0.0076	0.1184	0.062	0.0028	0.018	0.048
0.0312	0.0024	0.0068	0.0088	0.0428	0.0012	0.026	0.0208	0.1344	0.0016	0.0312	0.0432	0.0612	0.0956	0.0144	0.0104	0.0072	0.03	0.0128	0.0132	0.0272	0.0564	0.056	0.0008	1.2152	0.002	0.0948	0.0004	1.2152	0.0336	0.6232	0.0016	0.018	0.0404	0.0124	0.0484	0.0096	0.0008	0.0152	0.0152	0.4848	0.0496	0.0124	0.0012	0.0704	0.0004	0.01	0.0256
0.0264	0.0004	0.1444	0.0704	0.0728	0.0056	0.0184	0.0104	0.0356	0.8112	0.0676	0.0136	0.0068	0.0224	0.026	0.0064	0.0164	0.0132	0.1732	0.0012	0.0956	0.0288	0.012	0.016	0.0392	0.2736	0.0076	0.2832	0.0392	0.0896	0.0408	0.0856	0.036	0.024	0.0104	0.0008	0.0084	0.0096	0.0052	0.0124	0.194	0.0112	0.0544	0.0784	0.0688	0.0336	0.0036	0.008
0.0152	0.0016	0.1636	0.0168	0.0224	0.0008	0.004	0.012	0.0304	0.0012	0.0076	0.012	0.0308	0.0236	0.0364	0.0288	0.0084	0.0136	0.0088	0.1144	0.0896	0.0516	0.0104	0.0304	0.0008	0.0296	0.0792	0.0028	0.0008	0.042	0.0404	3.6696	0.008	0.012	0.8248	0.0268	0.0008	0.01	0.0116	0.0128	0.0156	0.0512	0.056	0.0464	0.0016	0.0004	0.01	0.0192
0.1248	0.0084	0.0008	0.0188	0.0508	0.0308	0.0016	0.0148	0.1672	0.1236	0.0064	0.006	0.0232	0.0116	0.2152	0.0024	0.0136	0.0012	0.0244	0.0244	0.002	0.0128	0.0196	0.0988	0.3512	0.0068	0.032	0.3156	0.3512	0.0036	0.0024	0.04	0.0028	0.1944	0.0172	0.0388	0.0532	0.0036	0.01	0.0128	0.042	0.036	0.0144	3.7116	0.274	0.1488	0.1144	0.0948
0.0212	0.0448	0.0104	0.0156	0.0128	0.0048	0.0136	0.0168	0.052	0.0024	0.0136	0.0276	0.3152	0.0004	0.0024	0.0116	0.0176	0.0496	0.0032	0.0144	0.016	0.0132	0.0112	0.002	0.2044	0.05	0.02	0.0088	0.2044	0.004	0.826	0.2448	0.012	0.0132	0.0156	0.0028	0.0024	0.0164	0.0308	0.0232	0.0052	0.0308	0.0368	0.1836	0.0556	0.0388	0.0044	0.0232
0.012	0.038	0.012	0.0248	0.0012	0.0432	0.0116	0.0148	0.008	0.018	0.0532	0.0016	0.0172	0.0252	0.0032	0.0844	0.086	0.0088	0.0008	0.0004	0.01	0.0208	0.0556	0.014	0.0104	0.0244	0.0148	0.0068	0.0104	0.0004	0.1604	0.0036	0.0224	0.0068	0.0064	0.014	0.0232	0.0064	0.018	0.0124	0.09	0.572	0.0612	0.014	0.1068	0.006	0.0032	0.0192
0.1412	0.0004	0.0388	0.0196	0.0108	0.0952	0.012	0.0124	0.2388	0.0328	0.1608	0.0076	0.0216	0.0124	0.1444	0.0004	0.0188	0.0024	0.0988	0.0068	0.01	0.0036	0.0104	0.0012	0.2668	0.0084	0.0392	0.2276	0.2668	0.004	0.004	0.0016	0.0112	0.0112	0.008	0.0144	0.0376	0.0252	0.0436	0.0572	0.1716	0.0392	0.0868	0.084	0.1872	0.0348	0.9168	0.0448
0.0476	0.004	0.0168	0.012	0.008	0.0096	0.0024	0.0028	0.37	0.0628	0.0984	0.0132	0.0224	0.0304	0.0076	0.0004	0.1292	0.0496	0.0016	0.0128	0.04	0.0572	0.0092	0.016	0.0248	0.0588	0.0888	0.0112	0.0248	0.0152	0.0192	0.048	0.0276	0.0104	0.0472	0.014	0.0064	0.03	0.0128	0.0188	0.0272	0.0008	0.002	0.0148	0.0044	0.2044	0.0128	0.0248
0.0048	0.0444	0.0052	0.0364	0.0024	0.0312	0.0136	0.0128	0.0508	0.3452	0.0052	0.0256	0.0184	0.002	0.0676	0.0004	0.0364	0.0164	0.0168	0.0004	0.0252	0.022	0.0084	0.0156	0.0356	0.0124	0.1156	0.01	0.0356	0.0056	0.0244	0.01	0.0168	0.0224	0.0128	0.0116	0.002	0.014	0.014	0.0152	0.0296	0.0004	0.076	0.5896	0.134	0.0896	0.118	0.0104
0.0456	0.0108	0.0124	0.0356	0.0156	0.0148	0.0116	0.0128	0.0096	0.0012	0.0368	0.0096	0.0132	0.0396	0.0168	0.0004	0.092	0.1804	0.0604	0.0236	0.0124	0.0104	0.012	0.0008	0.0716	0.034	0.0096	0.0644	0.006	0.0012	0.0516	0.864	0.0296	0.0208	0.04	0.0132	0.0108	0.0092	0.0124	0.0116	0.0852	0.1104	0.0056	0.0356	0.0128	0.0008	0.0696	0.0124
0.004	0.0016	0.0132	0.016	0.0076	0.1796	0.0216	0.0128	0.0208	0.0208	0.3224	0.0276	0.0076	0.0132	0.0532	0.0148	0.05	0.0104	0.0236	0.0316	0.004	0.03	0.012	0.0024	0.0052	0.0588	0.0104	0.0004	0.062	0.6424	0.0416	0.018	0.0128	0.012	0.5956	0.0168	0.0052	0.01	0.014	0.0296	0.5204	0.0256	0.3796	0.0216	0.0324	0.08	0.0196	0.0236
0.0344	0.0288	0.0348	0.0104	0.0544	0.0152	0.0412	0.0412	0.052	0.0736	0.0392	0.0112	0.006	0.1084	0.0104	0.0132	0.0212	0.0128	0.0008	0.0052	0.6724	0.0124	0.0104	0.0292	0.0184	0.0092	0.0008	0.0688	0.464	0.0072	0.0032	0.0108	0.0148	0.0036	0.0108	0.0544	0.0232	0.0224	0.014	0.0196	0.0096	1.6324	0.0192	1.876	0.0052	0.0244	0.0364	0.0128
0.0136	0.0948	0.0036	0.028	0.0132	0.032	0.0152	0.028	0.0248	0.6492	0.0072	0.2752	0.0224	0.3404	0.0132	0.0136	0.1692	0.022	0.008	0.002	0.0348	0.0064	0.0136	0.014	0.0952	0.0168	0.0124	0.4972	0.0952	0.0188	0.0136	0.0088	0.0104	0.108	0.0148	0.0068	0.0164	0.0132	0.0168	0.0104	0.0332	2.0284	0.008	0.0356	0.394	0.294	0.0156	0.0008
0.0116	0.012	0.0312	0.0084	0.0192	0.0124	0.026	0.0096	0.4692	0.0256	0.012	0.0028	1.4776	0.356	0.012	0.1612	0.0296	0.02	0.0088	0.1232	0.1016	0.0136	0.0132	0.0008	0.0088	0.2724	0.0252	0.0036	0.0088	0.2572	0.0388	0.6468	0.0372	0.182	0.012	0.0216	0.0116	0.0592	0.01	0.0236	0.0016	0.0276	1.8424	0.1768	0.0216	0.1424	0.0676	0.0004
0.006	0.0008	0.0072	0.0064	0.0084	0.0032	0.0096	0.022	0.0128	0.0064	0.2268	0.0232	0.0316	0.0024	0.1576	0.0124	0.0656	0.0772	0.0072	0.0116	0.1076	0.0056	0.0152	0.0128	0.002	0.0012	0.0392	0.0172	0.002	0.0232	0.0376	0.0216	0.0056	0.0196	0.0152	0.0048	0.0132	0.0588	0.016	0.0104	0.0304	0.0572	0.0672	0.0304	0.4128	0.9788	0.0004	0.1428
0.0008	0.048	0.012	0.0896	0.0028	0.0044	0.0136	0.0132	0.0016	0.0004	0.0008	0.0504	0.0008	0.0064	0.004	0.1552	0.1036	0.0812	0.2524	0.0124	0.0252	0.0208	0.0132	0.028	0.3048	0.0964	0.0048	0.0252	0.3048	0.0664	0.0192	9.7088	0.0228	0.012	0.0048	0.0144	0.0124	0.1212	0.0128	0.028	0.0096	0.0076	0.0992	0.0012	0.002	0.0644	0.0336	0.0152
0.02	0.0004	0.0704	0.0056	0.3944	0.0116	0.012	0.2032	0.0148	0.0064	0.0088	0.0008	0.0288	0.088	0.0256	0.0148	0.0108	0.0524	0.0456	0.016	0.0208	0.012	0.0132	0.2436	0.052	0.0312	0.0016	0.0044	0.052	0.0156	0.1228	0.0024	0.2824	0.0388	0.0092	0.0016	0.0128	0.02	0.012	0.0432	0.746	0.2428	0.042	0.0068	0.0268	0.0324	0.1156	0.0068
0.0012	0.0048	0.034	0.0068	0.2484	0.0128	0.0388	0.0116	0.324	0.0412	0.0096	0.0004	0.0028	0.0044	0.0028	0.024	0.0176	0.0092	0.0088	0.0064	0.02	0.0904	0.028	0.0104	1.162	0.0392	0.0584	0.0352	1.1622	0.0484	0.022	1.6536	0.034	0.0236	0.0156	0.004	1.6096	0.0124	0.0132	0.0024	0.1028	0.0136	0.0188	0.6656	0.0016	0.1032	0.0028	0.0012
0.0252	0.026	0.0208	0.0284	0.0128	0.088	0.0628	0.0124	0.0604	0.1524	0.014	0.018	0.0008	0.01	0.01	0.0012	0.0004	0.008	0.0192	0.014	0.0208	0.0396	0.006	0.0224	0.0084	0.0112	0.0008	0.0224	0.0084	0.0124	0.0072	0.0044	0.0084	0.0088	0.1208	0.0112	0.0068	0.0212	0.01	0.022	0.0248	0.0008	0.044	0.0244	1.2068	0.4464	0.0276	0.012
0.0804	0.0004	0.0532	0.0008	0.032	0.0052	0.0288	0.016	0.0004	0.0004	0.0036	6.432	0.0044	0.1096	0.0128	0.0176	0.064	0.022	0.008	0.0244	0.0108	0.0116	0.0004	0.02	0.0004	1.0184	0.6948	0.0344	0.0004	0.0548	0.0116	0.2476	0.08	0.0072	0.01	0.0032	0.012	0.0024	0.012	0.0136	2.8964	0.0036	0.1596	0.0024	0.0004	0.0192	0.008	0.0136
0.0176	0.0064	0.1128	0.0244	0.0728	0.06	0.0248	0.0124	0.0676	0.0356	0.0396	0.1372	0.0264	0.152	0.0036	0.0008	0.044	0.0196	0.0416	0.0112	0.0032	0.0196	0.008	0.0132	0.01	0.0252	0.002	0.0724	0.01	0.0152	0.008	0.0352	0.042	0.0212	0.0028	0.0368	0.1412	0.016	0.0504	0.012	0.2296	0.008	0.172	0.0672	0.0172	0.032	0.0236	0.0304
0.0784	0.0016	0.052	0.0112	0.0012	0.1276	0.0516	0.1792	0.0108	0.1572	0.01	0.0028	0.0004	0.0212	0.012	0.014	0.006	0.0144	0.0128	0.112	0.0244	0.0112	0.0004	0.0472	1.028	0.0068	0.258	1.082	1.0288	0.0156	0.6256	19.7808	0.1192	0.946	0.0412	0.0032	0.0536	0.0128	0.024	0.0356	0.0144	0.0544	0.1936	0.0008	0.2944	0.0096	0.0132	0.0392
0.0232	0.0004	0.0584	0.0684	0.012	0.0144	0.0112	0.0008	0.0028	0.4404	0.2716	0.0016	0.0028	0.1508	0.0464	0.0104	0.012	0.0144	0.0364	0.0348	0.0684	0.0128	0.0004	0.0136	0.072	0.0032	0.3992	0.0824	0.0728	0.02	0.0364	0.0716	0.0056	0.0236	0.0004	0.0076	0.0176	0.0152	0.0184	0.0344	0.048	0.314	0.2424	0.0144	0.002	0.0108	0.0044	0.0076
0.0112	0.0292	0.0172	0.0932	0.0104	0.0364	0.0024	0.02	0.0272	0.0052	0.008	0.1076	0.0312	8.5272	0.1072	0.0136	0.0036	0.0112	0.0024	0.016	0.042	0.0116	0.0188	0.0184	0.0352	0.0072	0.0352	0.1752	0.0352	0.196	0.0024	0.0076	0.2044	0.03	0.246	0.01	0.0072	0.0004	0.0088	0.0164	0.0048	0.0104	0.0352	0.1168	0.4176	0.0072	0.0352	0.008
0.0016	0.182	0.012	0.1916	0.0548	0.0564	0.0128	0.016	2.074	0.27	0.0128	0.482	0.0144	0.0572	0.0184	0.0276	2.2596	0.064	0.0704	0.004	0.0032	0.0024	0.1396	0.044	0.0364	0.006	0.0132	0.166	0.0364	0.322	0.072	0.0236	0.1744	0.0144	0.0016	0.0176	0.0004	0.0456	0.022	0.0892	0.0036	0.1104	0.0896	0.024	0.0004	0.0296	0.0028	0.0096
0.014	0.0292	0.0752	0.1092	0.1864	0.5556	0.0132	0.012	0.042	0.0648	0.0048	0.4764	0.004	0.0332	0.012	0.004	0.088	0.0372	0.016	0.0284	0.1016	0.0176	0.1168	0.0432	0.094	0.2384	0.0324	1.5148	0.0946	0.1192	0.046	0.0084	0.0012	0.0372	0.0036	0.0264	0.014	0.006	0.0084	0.0276	0.0128	0.0116	0.0648	0.0008	0.0004	0.0076	0.018	0.192
0.0168	0.0064	0.0152	0.0132	0.03	0.0028	0.0384	0.0004	0.4812	5.4696	0.4152	0.0324	0.0036	0.032	0.0188	0.0244	0.0252	0.0136	0.0156	0.0276	0.0104	0.0104	0.5352	0.0152	0.0128	0.0064	0.176	0.0036	0.0128	0.026	0.0084	0.006	0.0532	0.0048	0.1044	0.014	0.042	0.0036	0.0216	0.0256	0.0004	0.0192	0.026	0.0088	0.0376	0.1148	0.0024	0.0816
0.034	0.0704	0.1904	0.0308	0.0656	0.016	0.0312	0.01	0.4616	0.0404	0.4916	0.0444	0.0396	0.0488	0.0184	0.0152	0.1356	0.0144	0.016	0.0068	0.0176	0.0624	0.012	0.0308	0.0044	0.002	0.0072	0.012	0.0044	0.0344	0.05	1.1144	0.0752	0.0508	0.0016	0.0072	0.0132	0.4428	0.0104	0.0296	1.8572	0.016	0.0604	0.1028	0.124	0.0584	0.1848	0.014
0.0904	0.0004	0.0044	0.0108	0.0292	0.1152	0.0028	0.01	0.0068	0.2336	0.0392	0.0204	0.014	0.2328	0.0128	0.0248	0.0012	0.008	0.0172	0.0072	1.472	0.0148	0.0132	0.0264	0.0116	0.196	0.0312	0.2704	0.0116	0.0048	0.0336	0.0168	0.1328	1.0388	0.0164	0.032	0.0156	0.0028	0.0112	0.0192	0.0788	0.0092	0.0216	0.006	0.0052	6.1792	0.002	0.0136
0.0064	0.0056	0.0088	0.004	0.0032	0.0056	0.0428	0.1132	0.008	0.096	0.0244	0.0128	0.1256	0.0404	0.0104	0.028	0.1412	0.0148	0.016	0.01	0.2552	0.194	0.0104	0.0228	0.0584	0.01	0.0036	0.012	0.004	0.0244	0.0092	0.0472	0.0152	0.0044	0.016	0.0128	0.0412	0.0008	0.0128	0.014	0.0024	0.0016	0.0012	0.0072	0.0032	0.0872	0.0784	0.0124
0.0096	0.0004	0.0096	0.0168	0.0168	0.0064	0.0624	0.0176	3.1172	0.0724	0.4344	0.0068	0.002	0.0144	4.3528	0.01	0.0052	0.016	0.0016	0.0184	0.006	0.0652	0.0184	0.012	0.0016	0.0172	0.0196	0.1364	0.0016	0.094	0.2356	0.0128	0.0068	0.0112	0.0964	0.0412	0.01	0.0376	0.0128	0.0136	0.4916	0.206	0.0172	0.0228	0.0028	0.0528	0.0636	0.0032
0.0088	0.0016	0.0076	0.0104	0.096	0.0704	0.0144	0.014	0.0116	0.0008	0.024	0.01	0.0236	0.0368	0.0004	0.0088	2.86	0.0532	0.0116	0.0036	0.0972	0.116	0.0144	0.0572	0.06	0.0044	0.0828	0.6284	0.0612	0.37	0.406	0.0088	0.056	0.01	0.0324	0.004	0.0148	0.004	0.024	0.014	0.0372	0.012	0.0004	0.0168	0.0752	0.0372	0.0032	0.0608
0.024	0.002	0.0012	0.018	0.0152	0.008	0.02	0.012	0.01	0.0004	0.0296	0.126	0.0032	0.0044	0.0164	0.024	0.0032	0.0056	0.0108	0.086	0.0112	0.01	0.0292	0.1288	0.0056	0.0116	0.002	0.0104	0.0056	0.0712	0.0724	0.2352	0.0092	0.0196	0.01	0.0184	0.0104	0.5672	0.0112	0.128	1.7168	0.012	0.106	0.0084	0.0212	0.0076	0.0664	0.06
0.042	0.0072	0.0352	0.008	0.0104	0.0316	0.0356	0.0128	0.0052	0.0108	0.0508	0.0284	0.0252	0.0248	0.0024	0.002	0.016	0.0132	0.0212	0.0216	0.0508	0.1016	1.0964	0.0808	0.0684	0.926	0.0052	0.3204	0.0684	0.006	0.0096	0.0116	0.006	0.0124	0.0168	0.0032	0.0072	0.0136	0.0124	0.008	0.014	0.026	0.0552	0.0124	0.5088	0.0124	0.0048	0.012
0.0012	0.0124	0.004	0.014	0.0084	0.0352	0.0616	0.0096	0.1128	0.03	0.096	0.0016	0.0156	0.0144	0.012	0.0128	0.012	0.0184	0.0124	0.0092	0.0004	0.0076	0.014	0.1732	0.0384	0.006	0.0008	0.4068	0.0384	0.144	0.0068	0.0068	0.0216	0.0096	0.0348	0.0328	0.06	0.0112	0.0368	0.0128	0.0012	0.0908	1.3624	0.1648	0.5128	0.0144	0.004	0.0292
0.0956	0.0352	0.0228	0.1	0.008	0.0016	0.0136	0.0128	0.018	0.0572	0.008	0.0048	0.0228	0.0124	0.0112	0.0104	0.0448	0.0116	0.0016	0.0124	0.0116	0.01	0.016	0.0116	0.0108	0.022	0.112	0.0176	0.456	0.8748	0.0048	0.0064	0.2024	0.0768	0.0136	0.0188	0.0232	0.0128	0.0128	0.0116	0.0432	0.0504	0.0692	0.0276	0.0396	0.046	0.0068	0.012
0.0036	0.0004	0.0112	0.0128	0.0096	0.0024	0.026	0.0112	0.0016	0.1228	0.0016	0.0112	0.0176	0.0292	0.0108	0.01	0.008	0.0104	0.1424	0.0348	0.008	0.0088	0.0436	0.8	0.044	0.006	0.1204	0.0308	0.0448	0.0016	0.1212	0.0044	0.0148	0.012	0.018	0.0104	0.002	0.0172	0.026	0.0116	0.016	0.0196	0.0088	0.2084	0.0056	1.588	0.0276	0.0452
0.0012	0.0004	0.0108	0.0004	0.0028	0.0116	0.014	0.016	0.0012	0.0052	0.0652	0.126	0.2776	0.0096	0.0124	0.012	0.0036	0.018	0.0048	0.0344	0.004	0.0224	0.0104	0.0488	0.0008	0.0068	0.0064	0.2428	0.0008	71.896	0.0004	0.0304	0.0232	0.03	0.0312	0.048	0.0116	0.0032	0.0164	0.01	0.3512	0.0932	1.1636	0.0036	0.168	1.1724	1.11	0.0136
0.0876	0.0464	0.0196	0.0812	0.016	0.0144	0.0128	0.012	0.0196	0.0636	0.0176	0.0436	0.5752	0.0244	0.01	0.0308	0.0016	0.0168	0.0036	0.0396	0.0244	0.0228	0.0312	0.0344	0.2308	0.5608	0.0216	0.0652	0.2308	0.0236	0.0028	0.658	0.0656	0.0096	0.018	0.06	0.008	0.008	0.0172	0.0576	0.0136	0.0252	0.1164	0.0448	0.3672	0.096	0.014	0.788
0.026	0.1184	0.0112	0.0052	0.016	0.0292	0.0184	0.0128	0.1232	0.488	0.0136	0.1096	0.0012	0.1044	0.0112	0.0136	0.01	0.0048	0.008	0.0116	0.0148	0.012	0.0224	0.0004	0.002	0.0132	0.0072	0.0072	0.002	0.0104	0.024	0.0016	0.0868	0.0024	0.0108	0.0096	0.0204	0.0116	0.0016	0.0004	0.0504	0.0748	0.084	0.0068	0.0196	0.0144	0.0008	0.0116
0.012	0.0012	0.0352	0.0012	0.022	0.0136	0.0356	0.0128	0.0028	0.0004	0.0376	0.0188	0.0128	0.09	0.0048	0.0132	0.118	0.0144	0.0528	0.018	0.0196	0.0168	0.0124	0.012	0.0004	0.0192	1.1204	0.0568	0.0004	0.1684	0.0736	0.0068	0.0344	0.0152	0.0252	0.0264	0.0136	0.0068	0.0216	0.0008	0.0156	0.014	0.0368	0.0032	0.0184	0.022	0.0748	0.0136
0.0128	0.0124	0.0184	0.016	0.0004	0.0004	0.02	0.0156	0.1964	0.0444	0.0004	0.0012	0.0156	0.0608	0.0128	0.0128	0.0268	0.0044	0.018	0.0156	0.024	0.1048	0.002	0.144	0.0084	0.0084	0.1872	0.0084	0.0084	0.0828	0.1244	0.0024	0.0112	0.0212	0.2428	0.0136	0.0156	0.012	0.0152	0.0076	0.0128	0.0588	0.0008	0.1152	0.0004	0.0904	0.0228	0.0756
0.024	0.0028	0.0012	0.0196	0.0008	0.0128	0.082	0.0032	0.026	0.002	0.0136	0.0892	0.0016	0.002	0.0028	0.0192	0.0012	0.0496	0.1092	0.0112	0.0028	0.0728	0.0128	0.0896	0.0832	0.0176	0.0112	0.0288	0.0832	0.1424	0.024	0.0484	0.0156	0.0016	0.0004	0.01	0.0012	0.1176	0.0128	0.0476	0.0216	0.0536	0.0712	0.0068	0.0028	0.0108	0.0324	0.0304
0.0144	0.0452	0.0256	0.0404	0.014	0.03	0.012	0.0128	0.0164	0.0008	0.0288	0.078	0.0112	0.0048	0.006	0.0212	0.0112	0.0768	0.004	0.014	0.0212	0.0936	0.014	0.0004	0.008	0.124	0.0072	0.4088	0.0082	0.0196	0.1608	0.0168	0.002	0.0636	0.0112	0.0032	0.0036	0.0188	0.0508	0.01	0.0004	0.0028	0.0492	0.022	0.1616	0.0664	0.1892	0.0128
0.0304	0.0004	0.0072	0.0148	0.1176	0.0128	0.0012	0.0116	0.2424	0.018	0.004	0.0256	0.0048	0.0032	0.0732	0.0196	0.0148	0.0736	0.02	0.0132	0.032	0.0156	0.0132	0.01	0.0024	0.0156	0.0012	0.2708	0.0024	0.0536	0.0128	0.1608	0.0668	0.0004	0.0168	0.0012	0.0168	0.0036	0.0092	0.0056	0.146	0.0988	0.014	0.0156	0.0168	0.338	0.0064	0.0132
0.0288	0.0212	0.0188	0.014	0.0084	0.0196	0.014	0.0116	0.6	0.0104	0.026	0.0296	0.004	0.0288	0.0128	0.014	0.0016	0.0092	0.0128	0.02	0.0036	0.0104	0.01	0.0188	0.0008	1.3068	0.2364	0.0004	0.01	0.0696	0.0108	0.01	0.0308	0.0032	0.0272	0.0292	0.0044	0.0316	0.0108	0.0416	0.1304	0.0004	0.0032	0.0024	0.518	0.048	0.0232	0.0064
0.0028	0.014	0.0116	0.2732	0.008	0.0152	0.0268	0.0112	0.0304	0.1	0.0092	0.0004	0.0528	0.014	0.1072	0.002	0.37	0.0008	0.092	0.0492	0.1756	0.0068	0.0176	0.0716	0.0056	0.0108	0.312	0.6696	0.0056	0.0024	0.0408	0.0016	0.0188	0.0148	0.0136	0.0024	0.03	0.0252	0.0028	0.0216	0.094	0.0608	0.0016	0.506	0.014	0.0004	0.0072	0.0004
0.0008	0.0224	0.0056	0.0484	0.0936	0.0356	0.0196	0.0228	0.0008	0.056	0.0144	0.0816	0.0204	0.13	0.044	0.0104	3.9256	0.0132	0.0116	0.1528	0.0236	0.0056	0.018	0.154	0.0048	0.0688	0.0052	0.0244	0.0048	0.3928	0.0072	0.0208	0.0172	0.0012	0.0036	0.0052	0.0076	0.008	0.0072	0.1012	0.598	0.1608	0.0008	0.0184	0.0756	0.0088	0.0168	0.0128
0.008	0.0004	0.0064	0.0104	0.0116	0.0064	0.0136	0.0152	0.0768	0.0364	0.0144	0.0424	0.0148	0.004	0.0104	0.0304	0.0168	0.0452	0.0112	0.0032	0.022	0.0032	0.01	0.038	0.0164	0.0192	0.0648	0.0028	0.0164	0.026	0.0084	0.0004	0.0028	0.0148	0.0032	0.0532	0.0184	0.0136	0.01	0.036	0.0052	0.0288	0.0124	0.04	0.1028	0.0276	0.0052	0.0664
0.0196	0.0788	0.044	0.0272	0.0124	0.0248	0.0124	0.0344	0.2788	0.0016	0.006	0.2768	0.0032	0.0156	0.0132	0.0116	0.0132	0.0224	0.0176	0.0368	0.016	0.008	0.0128	0.0076	0.1432	0.024	0.0212	0.0024	0.008	0.2436	0.0176	0.0136	0.0176	0.0032	0.0188	0.0108	0.0552	0.0244	0.0712	0.1484	0.0552	0.034	0.0528	0.1756	0.0604	0.7872	0.0392	0.0632
0.0028	0.0152	0.0112	0.0008	0.0008	0.1632	0.0112	0.0276	0.0244	0.02	0.0124	0.056	0.002	0.0416	0.0276	0.0376	0.048	0.006	0.0212	0.0252	0.022	0.0164	0.1576	0.0124	23.5428	1.6716	0.4376	0.0868	1.316	0.0056	0.012	0.0088	0.018	0.012	0.0168	0.0004	0.01	0.0504	0.0236	0.0144	0.0336	0.0164	0.0244	0.6284	0.0504	0.0004	0.0096	0.0136
0.0036	0.2248	0.0132	0.012	0.1156	0.008	0.0136	0.008	0.0004	0.0028	0.0928	0.0152	9.2808	0.0176	0.0116	0.006	0.1888	0.002	0.3316	0.01	0.026	0.0076	0.0128	0.0056	1.1408	0.01	0.0884	0.0028	1.1408	0.0012	0.0128	0.0636	0.0064	0.0116	0.0244	0.0512	0.012	0.0008	0.0156	0.0188	0.2348	0.0004	0.0196	0.3884	0.0512	0.0124	0.0104	0.0136
0.0084	0.0088	0.0292	0.032	0.002	0.0956	0.0132	0.0032	0.3652	0.0012	0.7252	0.3008	0.1064	0.0268	0.0696	0.0124	0.0568	0.0076	0.0088	0.0284	0.0012	0.0124	0.0112	0.0036	0.0048	0.0156	0.0608	0.0312	0.0048	0.024	0.01	10.1832	0.0176	0.02	0.03	0.0564	0.0584	0.002	0.0516	0.0028	0.0304	0.0028	0.0604	0.0148	0.2588	0.0012	0.0064	0.0044
0.0292	0.0128	0.0956	0.2252	0.0184	0.0076	0.0032	0.0148	0.0028	0.0392	0.0136	0.402	0.01	0.0164	0.01	0.0004	0.3756	0.0044	0.0284	0.034	0.004	0.0168	0.008	0.116	0.0072	0.004	0.0384	0.284	0.0072	0.07	0.3564	0.0088	0.0096	0.0028	0.0036	0.0116	0.0056	0.0048	0.0172	0.05	4.3252	0.1368	0.3908	0.0068	0.0192	0.006	0.0296	0.0132
0.1208	0.026	0.03	0.0224	0.0096	0.0516	0.0396	0.0108	0.0268	0.042	0.0132	0.0308	0.0052	0.0096	0.3724	0.0668	0.0364	0.0004	0.024	0.0348	0.0268	0.0148	0.0124	0.0204	0.0576	0.044	0.0284	0.0756	0.0576	0.2332	0.0256	0.114	0.0036	0.0804	0.0016	0.0516	0.0484	0.008	0.0188	0.0016	0.004	0.0036	0.0856	0.0004	0.0084	0.154	0.0064	0.0576
0.0132	0.016	0.0312	0.0048	0.0132	0.1468	0.054	0.0104	0.0024	0.0628	0.0124	0.0028	0.008	0.0876	0.7584	0.0136	0.0488	0.0008	0.0152	0.0144	0.0392	0.008	0.0156	0.0136	2.814	0.036	0.0052	1.2836	2.8144	0.0972	0.0208	0.0004	0.0452	0.0048	0.032	0.0096	0.0012	0.0376	0.0116	0.0296	0.0004	0.022	0.0364	0.1148	0.082	0.0228	0.5836	0.0444
0.004	0.002	0.0248	0.2924	0.1836	0.162	0.0132	0.0012	0.008	0.0092	0.0168	0.016	0.0004	0.0212	0.0604	0.0124	0.4308	0.0468	0.1468	0.044	0.0728	0.0112	0.0468	0.0096	0.072	0.0696	0.0316	0.0016	0.0724	0.022	0.0148	0.0116	0.0204	0.0124	0.0144	0.0096	0.0028	0.0136	0.0136	0.004	0.0328	0.2016	0.0132	0.342	0.0152	8.1516	0.002	0.0444
0.004	0.026	0.0024	0.0036	0.0112	0.0252	0.0556	0.0124	0.0968	0.2448	0.0772	0.0792	0.0144	1.4088	0.0212	0.026	0.018	0.0124	0.0076	0.04	0.0064	0.0876	0.014	0.0424	0.6664	0.1992	0.0196	0.016	0.6664	0.0012	0.0256	0.016	0.0008	0.0056	0.0164	0.04	0.0144	0.06	0.0152	0.012	0.0168	0.0004	0.1968	0.0012	0.0004	0.008	0.0004	0.1436
0.0384	0.0008	0.0108	0.0032	0.026	0.0272	0.0356	0.0144	0.0008	0.0044	0.0144	0.0068	0.0116	0.0328	0.0132	0.0064	0.5404	0.03	0.0112	0.2728	0.072	0.01	0.012	0.0008	0.0076	0.0104	0.0032	0.0008	0.0076	0.0168	0.1212	0.0368	0.0244	0.0128	0.004	0.068	0.0692	0.008	0.0108	0.0012	0.0136	0.0012	0.2612	5.56	0.052	0.0124	4.4556	0.0348
0.0148	0.0108	0.456	0.0108	0.0496	0.0148	0.0136	0.0128	0.0036	0.056	0.0172	0.0008	0.0088	0.0008	0.0124	0.0052	0.0428	0.0148	0.0112	0.0128	0.1508	0.0028	0.0128	0.0108	0.0104	0.0168	0.0556	0.0428	0.0104	0.0004	0.7852	0.0544	0.012	0.0004	0.0872	0.0148	0.3056	0.0048	0.0128	0.012	0.0012	0.0068	0.0044	0.0144	0.0096	0.746	0.01	0.1136
0.0044	0.0328	0.0644	0.0324	0.0008	0.094	0.014	0.01	0.0024	0.0068	0.118	5.5124	0.0056	0.0052	0.0388	0.0184	0.0008	0.0024	0.0056	0.0004	0.0152	0.0052	0.0112	0.0032	0.0448	0.0096	0.466	0.0108	0.02	0.0656	0.3448	0.0376	0.0272	0.322	0.0244	0.0748	0.004	0.0068	0.0184	0.0128	1.8072	0.0044	0.0076	0.124	0.2644	0.0272	0.0032	0.0124
0.0088	0.012	0.0868	0.0176	0.0396	0.0016	0.012	0.012	0.0716	1.1724	0.0124	1.6812	0.0044	0.0024	0.0144	0.132	0.01	0.0036	0.0088	0.0128	0.1152	0.026	0.0056	0.0104	0.0116	0.0864	0.0576	0.2848	0.17	0.0056	0.0224	0.018	0.0516	0.0092	0.0088	0.0076	0.0308	0.004	0.0064	0.0184	0.0024	0.0044	0.0008	0.0124	0.0144	0.0016	0.0036	0.4912
0.324	0.094	0.01	0.032	0.034	0.2128	0.0088	0.0104	0.0108	0.432	0.0148	0.0028	2.016	0.0156	0.016	0.0112	0.0116	0.0316	0.0044	0.01	0.01	0.0196	0.006	0.0316	0.022	0.0224	0.0088	49.298	0.0226	0.0396	0.2868	0.01	0.0496	0.0132	0.0416	0.0104	0.012	0.022	0.01	0.0132	4.2172	0.0196	0.0192	0.1932	0.0476	0.004	0.076	0.0004
0.008	0.0288	0.002	0.0044	0.004	0.0064	0.0248	0.0024	0.048	0.0268	0.0144	0.048	0.0684	0.0112	0.0136	0.0328	0.002	0.0604	0.0308	0.0532	0.0164	0.0676	0.0128	0.0072	0.472	0.0028	0.0252	0.014	0.4724	0.1576	3.6932	0.0008	0.0768	0.0168	0.0128	0.0056	0.0188	0.0756	0.0144	0.012	0.0008	0.0364	0.056	0.0024	0.0216	0.0184	0.294	0.0516
0.0824	0.2024	0.0008	0.026	0.0124	0.0096	0.0484	0.0108	0.0196	0.8796	0.006	0.0116	0.0112	0.0412	0.0296	0.014	0.0008	0.0124	0.3516	0.0004	0.0264	0.0168	0.012	0.0028	0.008	0.0168	0.188	0.1704	0.008	0.02	0.022	0.164	0.0228	0.0416	0.3652	0.0236	0.018	0.004	0.0216	0.0112	1.248	0.0112	0.004	0.0832	0.2648	0.2092	0.0208	0.0132
0.0352	0.0004	0.004	0.0056	0.0124	0.0008	0.2164	0.0128	0.0004	0.072	0.1492	0.0052	0.0288	0.8124	0.012	0.094	0.0156	0.0068	0.0116	0.0168	0.1224	0.05	0.0312	0.0108	0.0164	0.074	0.0016	0.0072	0.018	0.0256	0.0036	0.006	0.1912	0.0048	0.0228	0.0836	0.0248	0.2012	0.0192	0.04	0.002	0.0124	5.0244	0.0224	0.0484	0.0324	0.0656	0.0264
0.026	0.0336	0.018	0.0208	0.1168	0.0124	0.0132	0.0112	0.0116	0.0456	0.0404	0.0004	0.0468	0.0008	0.064	0.0204	0.0064	0.0268	0.0172	0.032	0.0192	0.0088	0.0156	0.0172	0.0856	0.0068	0.0108	0.098	0.0856	0.0616	0.0056	1.0044	0.006	0.008	0.0008	0.0496	0.0136	0.004	0.0116	0.0804	0.7656	0.0124	0.0372	1.7592	0.0016	0.0788	0.0068	0.0488
0.0044	0.06	0.002	0.0248	0.0284	0.0296	0.0844	0.0048	0.0928	0.004	0.0004	0.0628	0.0156	0.1728	0.01	0.0116	0.0112	0.0296	0.0212	0.0148	0.0076	0.09	0.0152	0.0152	0.01	0.2964	0.1468	0.0548	0.0108	0.018	2.7428	0.0012	0.0452	0.1232	0.04	0.0128	0.0204	0.0076	0.01	0.0096	0.2284	0.226	0.0004	0.026	0.0076	0.054	2.0236	0.0116
0.002	0.012	0.0028	0.0448	0.0024	0.2236	0.0144	0.032	0.0892	0.244	0.0068	0.0216	0.0136	0.046	0.0044	0.0072	0.014	0.0072	0.0232	0.0168	0.0276	0.0224	0.0128	0.0564	0.0152	0.0112	0.0008	0.0124	0.0152	0.1988	0.07	0.0556	0.0228	0.0408	0.0004	0.0124	0.0028	0.044	0.0096	0.0152	0.3716	0.2004	0.0108	0.0216	23.8656	0.0688	0.0808	0.0028
0.01	0.0148	0.0336	0.0232	0.0132	0.0172	0.0172	0.0152	0.0828	0.0264	0.0108	0.1296	0.0472	0.022	0.052	0.0616	0.0128	0.148	0.7332	0.0008	0.0092	0.0092	0.0128	0.0368	0.0108	0.062	0.0412	0.0248	0.0108	0.0952	0.016	0.012	0.0124	0.0116	0.01	0.0064	0.012	0.0092	0.0096	0.0104	0.0128	0.1176	0.0028	0.0344	0.0136	0.9192	0.8604	0.0028
0.0076	0.0004	0.0196	0.132	0.0096	0.01	0.01	0.014	0.0096	0.0104	0.8476	0.0612	0.0088	0.0076	0.04	0.012	0.018	0.0888	0.0064	0.0124	0.014	0.0096	0.0116	0.0064	0.9748	0.0064	0.0236	0.4324	0.006	1.3804	0.02	0.0052	0.0124	0.01	0.0048	0.0164	0.018	0.02	0.0184	0.0144	0.0304	0.1308	0.018	2.7756	0.0036	0.0664	0.18	0.0132
0.0268	0.0152	0.0128	1.1716	0.0364	0.01	0.0104	0.0128	0.2704	0.0772	0.0148	0.0204	0.002	0.0116	0.0252	0.0184	0.0996	0.0048	0.0228	0.0472	0.0248	0.0232	0.0116	0.05	0.0264	0.0016	0.0772	0.0264	0.0264	0.0512	0.012	0.008	0.0152	0.0052	0.0084	0.0104	0.0452	0.0032	0.0348	0.0136	0.0028	0.0452	0.0056	0.0568	0.0256	0.404	0.0056	0.0276
0.0816	0.0004	0.0656	0.0244	0.0064	0.0264	0.014	0.0104	0.0136	0.004	0.0028	0.0852	0.0448	0.2916	0.0224	0.0132	0.0368	0.0524	0.0088	0.01	0.0412	0.0076	0.0168	1.7952	0.024	0.0236	0.0076	0.0096	0.0248	0.0028	0.0364	0.0212	0.016	0.0048	0.0304	0.0196	0.0176	0.0156	0.01	0.0644	0.6884	2.1024	0.0004	0.0024	0.022	0.0136	0.026	0.0956
0.0144	0.0016	0.072	0.0116	0.0192	0.0204	0.0216	0.0188	0.2572	0.09	0.04	0.0828	0.0108	0.0292	0.0412	0.0136	0.0096	0.0012	0.0144	0.0312	0.012	0.0052	0.0304	0.214	0.7816	0.0344	0.0008	0.0008	0.7816	0.0096	0.2016	0.1932	0.06	0.0076	0.0204	0.0124	0.0008	0.0128	0.0196	0.0116	0.0072	0.0272	0.0044	0.0032	0.0008	0.6992	0.14	0.0128
0.01	0.0228	0.0048	0.02	0.0124	0.0088	0.096	0.012	0.0064	0.0048	0.0192	0.0844	0.0076	0.0052	0.0288	0.0116	1.2664	0.0096	0.0112	0.0136	0.006	0.0132	0.0172	0.0104	0.1448	0.0712	0.1348	0.0048	0.324	0.0076	0.0136	0.012	0.0016	0.0032	0.1036	0.0132	0.004	0.0124	0.0124	0.0204	0.0116	0.3708	0.01	0.0236	0.0292	0.0228	0.0204	0.0212
0.0216	0.012	0.0112	0.0268	0.0264	0.0116	0.0172	0.0196	0.0496	0.0112	0.0072	0.0628	0.026	0.0068	0.01	0.0904	0.0824	0.0004	0.0004	0.0604	0.0096	0.002	0.0156	0.0052	0.0884	0.01	0.0388	0.0032	0.0884	0.0008	0.0124	0.0004	0.004	0.016	0.0176	0.0068	0.0352	0.0144	0.0128	0.0148	0.0004	0.0144	0.0004	0.0784	0.0148	0.0124	0.0308	0.022
0.0088	0.0292	0.0116	0.018	0.0124	0.0404	0.0428	0.0124	0.6112	0.0152	0.0108	3.1592	0.0004	0.0188	0.0028	0.022	0.1108	0.0028	0.022	0.0204	0.0064	0.0268	0.0612	0.0032	0.0612	0.0252	0.1864	1.7816	0.0612	0.0092	0.0096	0.006	0.004	0.1656	0.0328	0.018	0.0092	0.018	0.0168	0.0104	0.124	0.0056	0.006	0.0192	0.0132	0.2004	0.526	0.0104
0.0324	0.1552	0.0004	0.01	0.0108	0.0032	0.0188	0.01	1.2924	0.008	0.0752	1.7884	0.0272	0.016	0.1888	0.0076	0.0144	0.0044	0.0004	0.0024	0.0128	0.018	0.0124	0.016	0.048	0.0068	0.0412	0.9464	0.0482	0.0024	0.276	0.0056	0.03	0.0136	0.0096	0.0032	0.0128	0.0016	0.0104	0.0124	0.0004	0.1184	0.0328	0.0068	0.0024	0.2564	0.0112	0.0316
0.0036	0.0224	0.1636	0.0172	0.0052	0.0028	0.0276	0.012	0.0648	0.1024	0.022	0.01	0.0008	0.59	0.006	0.0036	0.0248	0.0692	0.0096	0.0052	0.0008	0.0108	0.0084	0.0312	2.5172	0.014	0.0008	0.002	2.5172	0.002	0.0436	0.0028	0.0076	0.0036	0.0216	0.012	0.0172	0.0032	0.0156	0.076	0.1468	0.272	0.2176	0.0072	0.0296	0.01	0.0108	0.0064
0.0244	0.0096	0.0116	0.0004	0.086	0.0136	0.006	0.01	0.064	0.864	0.016	0.0748	0.02	0.0468	0.0104	0.0216	0.0144	0.0112	0.0076	0.1364	0.0076	0.0016	0.0124	0.0072	0.0016	0.0104	0.0028	0.0168	0.0016	0.188	0.0124	0.0704	0.0048	0.0092	0.3852	0.0772	0.0072	0.0156	0.0196	0.01	0.0208	0.0036	0.0024	0.0368	0.2868	0.0116	1.0404	0.014
0.4272	0.0124	0.0204	0.0136	0.0296	0.0164	0.0416	0.012	0.0064	0.0256	0.062	0.0028	0.024	1.0832	0.0368	0.06	0.1032	0.032	0.0216	0.0068	0.0276	0.0828	0.0124	0.016	1.3696	0.0004	0.15	0.0088	1.3696	0.0548	0.536	0.0228	0.02	0.056	0.0112	0.0092	0.0108	0.0112	0.1776	0.0144	0.0012	0.0096	0.0376	0.0068	0.0092	0.412	0.004	0.0136
0.0168	0.0152	0.0772	0.0116	0.0076	0.0772	0.0104	0.0104	0.0976	0.0084	0.0008	0.022	0.0348	0.012	0.0028	0.1972	0.0112	0.1644	0.022	0.0004	0.0132	0.0172	0.0344	0.012	0.0384	0.018	0.1612	0.056	0.0384	0.0264	1.3444	0.0028	0.0156	0.0316	0.0452	0.0064	0.032	0.0072	0.0128	0.0148	0.0004	0.0056	0.3752	0.0144	0.186	0.1616	0.0384	0.0132
0.0168	0.0548	0.0484	0.0032	0.006	0.052	0.012	0.1408	0.0036	0.002	0.15	0.0252	6.308	0.0044	0.004	0.0052	0.0492	0.0316	0.0124	0.0136	0.1152	0.058	0.0124	0.0688	0.2512	0.3436	0.0008	0.0664	0.2512	0.0552	0.0028	0.0216	0.0036	0.0076	0.0132	0.0388	0.0176	0.0224	0.0284	0.0132	0.0004	0.0188	1.1044	0.0176	0.0232	0.0172	0.004	0.012
0.0184	0.0168	0.1756	0.0356	0.0076	0.0268	0.006	0.0172	0.134	0.8608	0.0264	0.0088	0.0512	0.0088	0.0048	0.0104	0.0096	0.0196	0.0032	0.02	0.014	0.0136	0.0132	0.0124	0.0152	0.0212	0.012	1.8664	0.024	0.1336	0.0068	0.0124	0.0332	0.09	0.0116	0.0516	0.0152	0.3584	0.004	0.0924	0.0028	0.0248	0.0244	0.0076	0.004	0.024	0.5052	0.0172
0.014	0.0348	0.0092	0.0776	0.0132	0.0256	0.012	0.0184	1.7928	0.0704	0.0276	0.0012	0.0016	1.846	0.0024	0.0472	0.0756	0.0332	0.0004	0.0164	0.0168	0.0196	0.0076	0.0496	0.014	0.1588	0.0208	0.1024	0.0146	0.0952	0.008	0.9632	0.0076	0.0216	0.0172	0.008	0.0416	0.0224	0.012	0.0188	0.0024	0.0112	0.0024	0.0084	0.132	0.078	0.128	0.0544
0.0176	0.0116	0.014	0.0132	0.0188	0.0012	0.022	0.0184	0.0012	0.0052	0.008	0.0252	0.0204	0.0176	0.0192	0.216	0.0552	0.0164	0.01	0.308	0.002	0.02	0.0208	0.0096	0.0004	0.7604	0.0004	0.0028	0.0004	0.19	0.0004	0.3348	0.0972	0.012	0.0088	0.0044	0.0196	0.056	0.0056	0.0224	0.004	0.0004	0.07	0.0212	0.3092	0.002	0.0064	0.0012
0.0028	0.006	0.0164	0.0152	0.0624	0.004	0.0336	0.0172	1.7248	0.0008	0.3692	0.0232	0.3692	0.4112	0.0284	0.0124	0.1252	0.0484	0.02	0.0024	0.0316	0.018	0.012	0.2504	0.012	0.0284	0.0344	0.012	0.0124	0.2176	0.0004	0.0284	0.0096	0.0036	0.04	0.1944	0.0196	0.0356	0.0188	0.2156	0.8244	0.3704	0.0168	0.0296	0.0004	0.0208	0.0148	0.014
0.0132	0.0024	0.0116	0.0064	0.0476	0.0192	0.0968	0.0992	0.0784	0.7456	0.0104	0.0148	0.0608	8.4324	0.0076	0.0516	0.0632	0.0168	0.004	0.1512	0.0024	0.024	0.0104	0.0016	0.0192	0.0092	0.0004	0.1696	0.0192	0.0316	0.022	0.0168	0.0016	0.012	0.0784	0.0188	0.002	0.0108	0.1016	0.0124	0.0476	0.0096	0.3216	0.0044	0.1652	0.5964	0.008	0.0704
0.008	0.0168	0.0128	0.0612	0.0588	0.0052	0.0144	0.0128	0.004	0.0168	0.0132	0.0088	0.0028	0.0036	0.172	0.01	0.0392	0.0252	0.0012	0.012	0.0248	0.0904	0.014	0.2132	0.0768	0.0156	0.0348	0.0464	0.0768	0.0476	0.0324	0.1436	0.03	0.16	0.014	0.0752	0.018	0.004	0.02	0.0076	0.002	0.0032	0.1036	0.03	0.1028	0.4516	0.0016	0.2892
0.0124	0.01	0.106	0.0072	0.0132	0.014	0.0136	0.0044	0.0008	0.0208	0.0288	0.026	0.044	0.7764	0.0132	0.016	0.002	0.002	0.2576	0.0252	0.0316	0.0076	0.0144	0.0636	0.0028	0.0068	0.02	0.0148	0.0028	0.0036	0.0004	0.0112	0.0632	0.0156	0.1412	0.044	0.0064	0.0692	0.022	0.0156	0.016	0.0012	0.0428	0.5668	0.4376	0.0084	0.038	0.0172
0.0092	0.0192	0.0168	0.0176	1.1084	0.0012	0.012	0.012	0.0004	0.0032	0.0068	0.0268	0.122	0.0516	0.0388	0.0004	0.004	0.0252	0.118	0.012	0.0016	0.0016	0.0636	0.016	0.094	2.394	0.09	0.0572	0.094	0.0184	0.0228	0.0132	0.0008	0.0132	0.0004	0.0136	0.0396	0.0068	0.01	0.0152	0.3532	0.0244	0.0332	0.0104	0.0744	0.0272	0.0736	0.0144
0.004	0.0064	0.0164	0.0688	0.0004	0.0016	0.0116	0.0416	0.96	0.0016	0.0004	0.0048	0.0464	0.0044	0.0004	0.0024	0.0128	0.0204	0.0048	0.0208	0.0016	0.0128	0.0124	0.0296	0.2432	0.456	0.028	0.7084	0.2432	0.484	0.0136	0.0352	0.0044	0.0128	0.004	0.0096	0.0644	0.03	0.0076	0.0108	0.026	0.0576	0.0152	0.232	0.006	0.0108	0.0208	0.0004
0.0644	0.0156	0.0872	0.778	0.1336	0.0172	0.2292	0.012	0.192	0.3248	0.0064	0.0112	0.0036	0.1636	0.0128	0.012	0.0128	0.0024	0.0112	0.0036	0.0008	0.0312	0.012	0.0248	0.0028	0.036	0.2112	0.0164	0.0028	0.0128	0.006	0.2956	0.058	0.006	0.0344	0.0624	0.0212	0.012	0.022	0.0144	0.012	0.0712	0.2736	0.0124	0.0316	0.012	6.2392	0.0368
0.3192	0.0132	0.016	0.0008	0.0304	0.0196	0.014	0.0188	0.23	0.1244	0.232	0.004	0.0148	0.0116	0.0108	0.0124	0.024	0.022	0.0112	0.0004	0.0096	0.0224	0.0336	0.0096	0.018	0.0732	0.0012	0.6468	0.0188	0.0336	0.0008	0.0232	0.134	0.0116	0.0192	0.01	0.0092	0.0004	0.0164	0.1032	0.0048	0.014	0.03	0.2304	0.0116	0.2284	0.0952	0.0132
0.0224	0.0016	0.108	0.1016	0.0668	0.0136	0.0128	0.0104	0.4824	0.0268	0.03	0.0108	0.0048	0.0016	0.0172	0.0128	0.002	0.0132	0.0004	0.0224	0.0256	0.0084	0.0776	0.0096	0.076	0.0192	0.0084	0.0236	0.0764	0.0176	0.0428	0.0072	0.0256	0.0192	0.0004	0.0196	0.0396	0.022	0.008	0.0032	0.0696	0.0004	0.0764	0.144	2.1312	0.83	0.008	0.018
0.0016	0.0148	0.032	0.0032	0.0172	0.0276	0.014	0.028	0.0032	3.0548	0.0124	0.004	0.0016	0.0128	0.0144	0.042	0.004	0.0172	0.0176	0.012	0.004	0.0064	0.012	0.0088	0.082	0.6652	0.0672	0.2628	0.0828	0.0208	0.0052	0.0324	0.0188	0.0092	0.0084	0.0688	0.0568	0.0604	0.0128	0.0228	0.1284	0.1524	0.0804	0.0164	0.3048	0.0236	0.0004	0.0148
0.0396	0.0156	0.022	0.1568	0.014	0.0288	0.0124	0.0108	0.1432	0.1148	0.006	0.0016	0.006	0.0024	0.01	0.0132	0.0056	0.0044	0.0112	0.0044	0.0288	0.004	0.0104	0.0628	0.2456	0.0916	0.03	0.1052	0.05	1.2728	0.0292	0.3764	0.0176	0.01	0.0388	0.018	0.0064	0.0068	0.0104	0.0148	0.002	0.0528	0.0296	0.0104	0.44	0.0228	0.0048	0.0164
0.0068	0.0056	0.0028	0.0072	0.0088	0.0092	0.014	0.0136	0.028	0.006	0.0184	0.0144	0.0048	0.0144	0.0376	0.012	0.0188	0.0292	0.0188	0.0232	0.044	0.0124	0.0128	0.012	1.7924	0.026	0.3156	0.0132	1.7924	0.0056	0.1428	0.0024	0.0248	0.0048	0.0128	0.0368	0.0368	0.0164	0.0224	0.0076	0.0004	0.0104	0.2176	0.018	0.0124	0.3128	0.0188	0.0284
0.032	0.0648	0.01	0.0116	0.0112	0.0044	0.012	0.0392	0.0068	0.5032	0.0036	0.4008	0.03	0.0096	0.0284	0.022	0.0368	0.1284	0.0168	0.0096	0.0156	0.01	0.0356	0.0012	0.488	0.3388	0.002	5.596	0.4886	0.0172	0.0164	0.0172	0.0752	0.0024	0.0232	0.0744	0.0132	0.0044	0.0144	0.0116	0.008	0.3152	0.0256	0.4524	0.0136	0.0164	0.0108	0.0184
0.01	0.1148	0.0036	0.0108	0.0508	0.1048	0.0056	0.012	2.3832	0.0504	0.0152	0.052	0.0012	0.05	0.0296	0.02	0.0672	0.0108	0.012	0.0508	0.0184	0.0056	0.01	0.002	0.0256	0.1156	0.0124	0.0864	0.0256	0.6364	0.0152	0.0252	0.016	1.0944	0.0388	0.0144	0.0056	0.0196	0.0124	0.0208	0.0172	0.02	0.0012	0.0072	0.0076	0.0252	0.0252	0.0188
0.0132	0.0116	0.0056	0.0164	0.0948	0.0048	0.0276	0.0188	0.162	0.1348	0.1856	0.0252	0.0024	0.0416	0.012	0.0212	0.0348	0.0848	0.0872	0.1336	0.0512	0.042	0.0128	0.002	0.1044	0.2628	0.3012	0.0008	0.1044	0.0116	0.0004	0.0008	0.0552	0.0388	0.008	0.0016	0.0836	0.0108	0.0124	0.0452	0.1052	0.0088	0.0132	0.1408	0.0568	0.5028	0.0032	0.0052
0.0092	0.002	0.0004	0.0376	0.1632	0.0056	0.0096	0.0208	0.0136	1.9628	0.0596	0.0164	0.0064	0.0112	0.0064	0.0012	0.0004	0.0132	0.0128	0.0144	0.0116	0.0404	0.0096	0.0076	0.0336	0.0252	0.0692	0.0016	0.008	0.0268	0.0036	0.0044	0.0252	0.0112	0.024	0.012	0.0076	0.0048	0.0132	0.0128	0.0424	0.012	0.0148	0.0192	0.0184	0.2796	0.0104	0.2292
0.0828	0.0396	0.01	0.016	0.0388	0.0068	0.0044	0.014	0.312	0.4856	0.0272	0.0108	0.0088	0.0004	0.002	0.02	0.1244	0.0348	0.0832	0.0324	0.1284	0.0028	0.0156	0.0176	0.01	0.0184	0.0032	5.3716	0.0172	0.0092	0.012	0.118	0.0504	0.0208	0.0676	0.0084	0.0128	0.0056	0.0128	0.0172	0.0912	0.4628	0.066	0.0024	0.0484	0.044	0.0164	0.084
0.1104	0.1192	0.0036	0.0004	0.014	0.0096	0.028	0.0484	0.0112	0.2708	0.0092	0.0072	0.004	1.1044	0.0124	0.0024	0.424	0.01	0.0004	0.0172	0.0112	0.0228	0.0164	0.0176	0.002	0.0128	0.0156	0.0564	0.0026	0.2536	0.1024	0.0072	0.0148	0.042	0.0572	0.0004	0.0132	0.0276	0.0132	0.0144	0.9712	0.0004	0.036	0.0036	0.008	0.0016	0.0016	0.0348
0.0032	0.0104	0.0252	0.0072	0.0328	0.0252	0.0132	0.0004	0.1628	0.0004	0.0144	0.5052	0.04	0.0256	0.008	0.0096	0.0024	0.0276	0.0432	0.0272	0.0016	0.0136	0.0132	0.1376	0.0416	0.0756	0.0164	0.1464	0.0416	0.0152	0.004	0.0108	0.0928	0.0384	0.396	0.0164	0.0052	0.012	0.0128	0.0128	0.1988	0.0032	0.0116	0.038	0.024	0.322	0.0024	0.0304
0.002	0.0196	0.0112	0.028	0.012	0.0116	0.0356	0.0172	1.0072	0.0016	0.01	1.4256	0.0356	0.01	0.0004	0.0116	0.0076	0.0016	0.014	0.0004	0.0316	0.0576	0.01	0.0104	0.0032	0.4508	0.0184	0.002	0.0032	0.49	0.0952	0.012	0.0072	0.0132	0.216	0.0108	0.0196	0.0276	0.014	0.0132	0.004	0.0204	0.016	0.0004	0.008	0.0784	0.0148	0.0008
0.0308	0.0008	0.0172	0.002	0.014	0.1744	0.0132	0.0252	0.002	0.3264	0.0196	3.8536	0.01	0.0032	0.4604	0.0132	0.0244	0.0108	0.0032	0.0072	0.0356	0.004	0.0116	0.0824	0.036	0.0092	0.0092	0.0024	0.0368	0.0316	0.018	0.3024	0.0308	0.01	0.01	0.0116	0.0172	0.0292	0.0136	0.0132	0.0068	0.0852	0.0656	0.018	0.0212	0.0608	0.0004	0.0628
0.1668	0.0168	0.0432	0.0004	0.0152	0.0428	0.0348	0.0004	0.0688	0.018	0.0004	0.0084	0.0784	0.02	0.022	0.0064	0.0108	0.1196	0.0116	0.0808	0.3404	0.0296	0.0112	0.01	0.0552	0.0004	0.0148	0.106	0.004	0.1488	0.0344	1.2596	0.1512	0.0108	0.036	0.05	0.0104	0.016	0.0156	0.0132	0.0092	0.0096	0.0184	0.0096	0.022	0.0072	0.002	0.014
0.0948	0.0276	0.1076	0.0476	0.002	0.0136	0.0224	0.012	0.1008	0.0008	0.0024	0.1116	0.0776	0.002	0.012	0.0124	0.2192	0.0912	0.0108	0.0668	0.0128	0.002	0.014	0.002	0.0064	0.014	0.0128	0.0416	0.0064	0.0024	0.0036	0.022	0.032	0.0144	0.0204	0.1084	0.0072	0.0248	0.0132	0.0268	0.1308	0.4112	0.062	12.79	0.0012	0.0292	0.0612	0.0128
0.0076	0.0128	0.0548	0.0116	0.0428	0.034	0.0156	0.0128	0.0684	0.0176	0.1124	0.0052	0.0056	0.0048	0.0184	0.0064	0.0316	0.01	0.3604	0.0512	0.018	0.0096	0.028	0.0104	0.1228	0.0028	0.0024	0.0344	0.058	0.1332	0.2048	0.0032	0.01	0.012	0.024	0.008	0.0064	0.02	0.0132	0.0128	0.0052	0.094	0.0224	0.0008	0.0016	0.0008	0.0212	0.0128
0.0224	0.0376	0.0052	0.0124	0.1428	0.0144	0.0068	0.0424	0.0412	0.002	0.0084	0.056	0.0016	0.556	0.0064	0.0168	0.0976	0.0008	0.0096	0.0304	0.5704	0.0168	0.014	0.004	0.0608	0.0004	0.124	0.0096	0.0608	0.0012	0.0252	0.0008	0.0024	0.0308	0.0004	0.0216	0.0092	0.0104	0.0112	0.014	0.1368	0.0072	0.0036	0.0364	0.0256	1.0672	0.016	0.0096
0.0512	0.0076	0.04	0.024	0.0288	0.0408	0.01	0.016	0.026	1.348	0.0772	0.4148	0.0088	0.008	0.0232	0.0136	0.1916	0.1452	0.2392	0.0388	0.0144	0.0124	0.01	0.0128	1.1712	0.37	0.1036	0.068	0.008	0.0156	0.0208	0.2156	0.0044	0.0112	0.0152	0.0172	0.016	0.008	0.0124	0.0116	0.0264	0.0576	0.052	0.0052	0.0328	0.0208	0.0824	0.046
0.0012	0.0108	0.042	0.016	0.0008	0.0084	0.0128	0.016	0.0092	0.016	0.0004	0.0828	0.0852	0.0148	0.0144	0.012	0.006	0.0056	0.006	0.0384	0.0364	0.0452	0.018	0.0208	0.0276	0.3044	0.0684	0.028	0.0276	0.0004	0.3824	0.9228	0.0152	0.0092	0.0116	0.014	0.0004	0.0072	0.0128	0.4072	0.0076	0.1108	0.0012	0.1148	0.0132	0.4596	0.0328	0.0444
0.0324	0.008	0.0116	0.0288	0.0268	0.0196	0.034	0.0128	0.028	0.4792	0.0276	0.0056	0.124	0.068	0.0088	0.0264	0.002	0.0084	0.0144	0.0004	0.5312	0.01	0.0508	0.018	0.0008	0.0048	0.0176	0.0148	0.0008	0.0204	0.0012	0.0632	0.0012	0.0444	0.0132	0.0124	0.0136	0.0728	0.0132	0.0132	0.2732	0.3364	0.0056	0.5288	0.2956	1.232	0.0132	0.0096
0.0192	0.0464	0.0376	0.0036	0.0016	0.01	0.0024	0.0652	0.0032	0.0144	0.0076	0.0164	0.0084	1.7356	0.0232	0.024	0.008	0.0128	0.0092	0.0056	0.0412	0.0104	0.004	0.0372	0.0048	0.1388	0.0916	0.4444	0.0048	1.2764	0.0032	0.0176	0.0092	0.012	0.4172	0.0232	0.0124	0.0928	0.0112	0.0512	0.0072	0.0016	0.0232	0.0356	0.162	0.004	0.0044	0.0128
0.0124	0.0996	0.0024	0.008	0.0116	0.0028	0.0436	0.0152	0.0664	6.8176	0.1808	0.0768	0.0548	0.1104	0.0516	0.0208	0.0016	0.022	0.034	0.0968	0.0404	0.0168	0.01	0.0136	0.0032	0.0056	0.0344	0.0176	0.0032	0.0048	0.0028	0.0364	0.0152	0.0052	0.0132	0.0224	0.012	0.0216	0.0112	0.0224	1.9768	0.0236	0.0348	0.046	0.0004	0.0112	0.0112	0.0128
0.0788	0.0008	0.0252	0.0372	0.01	0.002	0.0568	0.0128	0.0324	0.002	0.2448	0.0292	0.0124	0.0072	0.012	0.0124	0.0064	0.014	0.0308	0.0144	0.012	0.0124	0.192	0.002	0.0008	0.0028	0.0976	0.1308	1.756	0.0552	1.4024	0.0056	0.0276	0.0408	0.0012	0.0128	0.018	0.0256	0.0112	0.0804	0.0012	0.0044	0.066	0.0144	0.1156	0.0156	0.024	0.0056
0.0056	0.0164	0.0124	0.0016	0.028	0.02	0.012	0.09	0.01	0.0048	0.006	0.8676	0.0096	0.0136	0.2824	0.0112	3.4296	0.0232	0.0484	0.014	0.0104	0.0008	0.006	0.0028	0.1032	0.0396	0.0048	1.426	0.1032	0.012	0.032	0.1544	0.0164	0.0096	0.1684	0.0384	0.0068	0.0056	0.0128	0.002	0.0084	0.0232	1.892	0.0188	0.0204	0.04	0.0068	0.0204
0.006	0.0172	0.0584	0.0264	0.0428	0.024	0.0048	0.0128	0.02	0.0124	0.024	0.2376	0.1224	19.902	0.126	0.0132	0.0032	0.0396	0.0964	0.0036	0.0104	0.2388	0.0124	0.0148	0.172	13.828	0.304	0.0244	0.1726	0.0076	0.0004	0.012	0.0436	0.0756	0.1384	0.0164	0.0656	0.0252	0.0124	0.0132	0.024	0.0032	0.1408	0.002	0.0024	0.136	0.0088	0.0128
0.1052	0.0012	0.0084	0.0052	0.1004	0.0092	0.012	0.0176	0.0268	0.1568	0.0084	0.0064	0.0008	0.0016	0.0276	0.044	0.0396	0.0116	0.004	0.0024	0.0484	0.0136	0.0128	0.0172	0.0056	0.626	0.0144	0.008	0.0056	0.0352	0.02	0.036	0.0072	0.0076	0.0116	0.0056	0.0168	0.018	0.0148	0.0184	0.0376	0.0036	0.0376	0.1084	0.0144	0.03	0.0004	0.0128
0.0564	0.11	0.0124	0.0232	0.0108	0.0232	0.0036	0.0136	0.2484	0.0232	0.0008	0.174	0.0408	0.0092	2.4016	0.0472	1.0828	0.0108	0.0148	0.0004	0.04	0.012	0.0172	0.0156	0.0052	0.0644	0.0068	0.0104	0.0052	0.0144	0.0016	0.0004	0.0156	0.0016	0.0008	0.0032	0.0136	0.0152	0.0144	0.012	0.012	0.5008	0.03	0.0752	0.0032	0.0004	0.0192	0.05
0.044	0.002	0.0348	0.0176	0.0104	0.1704	0.214	0.0112	0.2208	0.0044	1.2848	0.0116	0.0064	0.0004	0.016	0.0112	0.008	0.0056	0.0428	0.0076	0.0288	0.0128	0.0068	0.0312	0.012	0.0388	0.0036	0.004	0.0124	0.0088	0.094	0.0128	0.1	0.0172	0.0344	0.0184	0.0052	0.0136	0.0128	0.0428	0.172	0.0036	0.0072	0.1584	0.0008	0.0004	0.0052	0.0128
0.0212	0.0436	0.0012	0.0144	0.022	0.0192	0.0112	0.022	10.6336	0.4288	0.0208	0.0064	0.0396	0.0024	0.112	0.028	0.0196	0.0136	0.1464	0.0092	0.02	0.0236	0.1624	0.0112	0.1328	0.0172	0.0304	0.0408	0.008	0.0176	0.0172	0.026	0.0008	0.0104	0.0104	0.0008	0.0012	0.0196	0.01	0.0328	0.0088	0.006	0.0004	0.3016	0.2536	0.6812	0.0068	0.0228
0.0016	0.0188	0.0192	0.0496	0.014	0.0364	0.0452	0.0204	0.0048	0.0056	0.0004	0.0796	0.0112	0.0048	0.0044	0.0148	1.1968	0.0572	0.0476	0.0092	0.102	0.0132	0.0136	0.0572	0.0016	0.0108	0.6272	0.0624	0.0016	0.0032	1.7236	0.0432	0.0336	0.272	0.01	0.004	0.012	0.0132	0.01	0.0216	0.0084	0.0588	0.0032	0.01	0.1752	0.0148	0.0004	0.0136
0.034	0.0104	0.0236	0.0096	0.0072	0.01	0.0104	0.014	0.0144	0.0064	0.038	0.0152	0.4156	0.3892	0.0212	0.0312	0.2656	0.1176	0.0188	0.1688	0.0168	0.0196	0.0172	0.0036	0.964	0.0404	0.2108	0.0036	0.964	0.178	0.0188	0.0208	0.0048	0.0028	0.012	0.1964	0.0212	0.0144	0.0164	0.0168	0.0164	0.0708	0.1172	0.2896	0.0476	0.0148	0.0176	0.0808
0.2668	0.0276	0.1084	0.0044	0.0128	0.0084	0.0148	0.0228	0.0064	0.004	0.1608	0.5492	0.0108	0.5084	0.0244	0.0124	0.0396	0.0036	0.0292	0.01	0.0156	0.01	0.0016	0.0648	0.0012	0.0056	0.0004	0.024	0.0012	0.0076	0.0188	0.0192	0.0192	0.008	0.0276	0.0572	0.0112	0.0092	0.0128	0.0232	0.0068	0.0924	0.0808	0.0076	0.024	1.2788	0.2112	0.0648
0.0048	0.1488	0.0056	0.0232	0.0192	0.0108	0.0112	0.324	0.032	0.094	0.1196	0.0364	0.0204	0.2368	0.0088	0.0156	0.0192	0.0108	0.0136	0.0772	0.036	0.0052	0.0136	0.016	0.01	0.3204	0.0108	0.024	0.0196	0.0404	0.0016	1.3624	0.028	0.024	0.0084	0.0136	0.0196	0.034	0.0108	0.008	0.4728	0.0072	0.0484	0.7636	0.0596	0.0544	0.0088	0.0184
0.0156	0.034	0.0032	0.01	0.0448	0.0148	0.0144	0.016	0.1328	0.074	0.0356	0.1268	0.0156	0.0152	0.0228	0.0128	0.6456	0.0396	0.0144	0.0108	0.1612	0.012	0.012	0.0088	0.164	0.04	0.0024	0.0068	0.1646	0.0636	0.1408	0.0292	0.0004	0.0232	0.038	0.0064	0.0304	0.0128	0.0232	0.012	0.0452	0.0172	0.5896	0.1368	0.048	0.0304	0.1112	0.0084
0.0372	0.0028	0.0116	0.0032	0.0052	0.0396	0.0164	0.0124	0.048	0.0176	0.0228	0.002	0.0104	0.0056	0.0092	0.018	0.0028	0.0604	0.0096	0.0028	0.012	0.0356	0.0136	0.0244	0.0088	0.0776	0.0008	0.0344	0.086	0.0232	0.1928	0.0164	0.0132	0.0096	0.0108	0.0456	0.0516	0.0084	0.0224	0.0072	0.0032	0.0328	0.0048	0.0144	0.192	0.0096	0.0192	0.0164
0.0008	0.0652	0.018	0.0084	0.008	0.0064	0.0344	0.0128	2.1788	0.0056	0.0624	0.0168	0.0064	0.0808	0.0212	0.0104	0.0956	0.088	0.008	0.0228	0.2532	0.0048	0.0184	0.0896	0.0544	0.0304	0.008	0.0784	0.0544	0.044	1.0352	0.0092	0.0108	0.0104	0.0168	0.008	0.022	0.0068	0.0088	0.0112	0.0464	0.0004	0.2216	0.0352	0.0136	0.0136	0.0708	0.6836
0.0096	0.0216	0.07	0.0004	0.0772	0.0076	0.0124	0.0236	6.9428	0.0884	0.2876	0.126	0.0084	0.7064	0.0024	0.014	0.0444	0.016	0.0072	0.0036	0.1452	0.004	0.014	0.066	0.0384	4.41	0.0108	10.0948	0.0384	0.0056	0.0096	0.0152	0.0144	0.014	0.0036	0.014	0.0136	0.0304	0.0368	0.004	0.0336	0.0296	0.1624	0.026	0.0028	0.0052	0.052	0.0288
0.016	0.0252	0.036	0.0336	0.0612	0.01	0.0172	0.0212	3.4832	0.1832	0.244	0.2408	0.0152	0.0564	0.0104	0.0224	0.02	0.0588	0.0004	0.0312	0.0492	0.0108	0.0156	0.002	0.304	0.1216	0.2148	0.0524	0.3046	0.0156	0.0192	0.5584	0.0664	0.0144	0.0052	0.0144	0.004	0.0716	0.0144	0.0132	0.522	0.014	0.0112	0.0004	0.004	0.0144	0.1284	0.0132
0.0752	0.0688	0.0808	0.0224	0.0064	0.0136	0.0168	0.0132	0.012	0.0788	0.0256	0.1136	0.0112	0.0924	0.0212	0.0144	0.0312	0.0128	0.016	0.01	0.0308	0.01	0.01	0.0116	0.0208	0.018	0.0168	0.0436	0.0208	0.8504	0.002	1.356	0.0128	0.0132	0.026	0.0088	0.0104	0.1364	0.0136	0.0136	0.3308	0.0432	0.5064	0.0104	0.0024	0.0068	0.014	0.0048
0.014	0.0476	0.0148	0.0096	0.002	0.1192	0.0128	0.0708	0.0128	0.0212	0.01	0.0712	0.0192	0.1056	0.0132	0.006	0.0056	0.0308	0.0624	0.0028	0.0292	0.0024	0.012	0.046	0.0552	0.3348	0.1564	23.9296	0.0552	0.0024	0.0096	0.0036	0.0624	0.0132	0.5492	0.0112	0.0448	0.0016	0.012	0.0712	0.0308	0.0016	0.0084	0.0084	0.0132	0.0348	0.0028	0.0144
0.0184	0.0276	0.0072	0.0268	0.0064	0.0128	0.0112	0.0332	0.0008	0.0144	0.0232	0.37	0.0152	0.0112	0.0112	0.0412	0.0668	0.002	0.082	0.0276	0.006	0.024	0.01	0.0696	0.0212	0.0248	0.0528	0.0156	0.0212	0.0224	0.0024	0.4864	0.014	0.0096	0.0512	0.0028	0.0048	0.0072	0.0052	0.012	0.018	0.0632	0.1208	0.0132	0.006	0.0292	0.0376	0.0892
0.0088	0.0004	0.0096	0.0156	0.0072	0.0004	0.0124	0.0112	0.0128	0.0724	0.0196	0.0336	0.0256	0.0208	0.0284	0.0152	0.0088	0.022	0.0288	0.01	0.0132	0.0088	0.0128	0.012	0.204	0.034	0.0064	0.0132	0.2042	0.0344	0.016	2.6672	0.0084	0.0368	0.0096	0.0204	0.0112	0.2132	0.0128	0.0112	0.0056	0.2328	0.0512	0.0112	0.0412	0.01	0.3628	0.0696
0.0616	0.0096	0.0184	0.0804	0.0144	0.0044	0.012	0.022	0.022	0.0012	0.0636	0.01	0.0928	0.04	0.0004	0.012	0.0096	0.0992	0.014	0.0128	0.0036	0.156	0.0112	0.0052	1.2228	0.0016	0.0164	0.008	1.2228	0.0128	0.0128	0.0052	0.01	0.0252	0.0884	0.0212	0.0136	0.0144	0.01	0.0156	0.0384	0.0068	0.0492	2.164	0.0056	0.2364	0.016	0.0308
0.0812	0.0624	0.01	0.0112	0.006	0.0336	0.0184	0.0144	0.0356	0.0076	0.2124	1.57	0.0348	0.0104	0.0892	0.0208	0.0344	0.0136	0.0472	0.0828	0.0256	0.05	0.0512	0.0152	0.0044	0.0184	0.0816	0.0484	0.0044	0.0116	0.1864	0.0016	0.03	0.012	0.0124	0.0012	0.0108	0.0152	0.0124	0.0156	0.1928	0.0012	0.0188	0.034	0.0128	0.0296	0.1568	0.0088
0.0056	0.0232	0.0156	0.0088	0.0112	0.0188	0.0136	0.1488	0.3216	0.1264	0.0008	0.002	0.0216	0.0056	0.026	0.0336	0.0344	0.0084	0.0356	0.0064	0.0012	0.1056	0.0112	0.0116	0.0044	0.0004	0.0004	4.8512	0.0044	0.1872	0.012	0.0152	0.0272	0.0168	0.0044	0.0228	0.0144	0.0028	0.0124	0.0128	0.0324	0.0284	0.1776	0.0004	0.0164	0.3016	0.0184	0.0968
0.014	0.018	0.0104	0.0312	0.062	0.0076	0.0148	0.0128	0.028	0.014	0.0092	0.0344	0.0676	0.0252	0.0184	0.018	0.6376	0.01	0.0036	0.0248	0.0684	0.0284	0.018	0.0036	0.01	0.0188	0.0124	0.018	0.0184	0.1024	0.0156	0.022	0.0524	0.0468	0.008	0.0008	0.0208	0.0152	0.0164	0.0168	0.0188	0.0244	0.0244	0.0136	0.0008	0.01	0.0324	0.026
0.0052	0.0192	0.0064	0.0048	0.0188	0.0312	0.0156	0.0204	0.0028	0.1516	0.01	0.0148	0.764	0.0036	0.0232	0.004	0.0072	0.0164	0.0104	0.0052	0.0012	0.0152	0.0332	0.0116	0.0572	0.2688	0.0428	0.0428	0.042	0.0552	0.2232	0.0048	0.01	0.0312	0.0092	0.0036	0.0336	0.2832	0.0136	0.0128	1.0668	0.0004	0.0024	0.0564	0.0228	0.0084	0.0156	0.0004
0.0216	0.026	0.012	0.06	0.01	0.026	0.018	0.0128	0.0252	0.048	0.0088	0.0012	0.0072	0.0112	0.0136	0.0004	0.018	0.0336	0.0104	0.0108	0.0036	0.0276	0.0092	0.012	0.0496	0.1664	0.5948	0.0784	0.01	0.0128	0.0056	23.268	0.0008	0.0164	0.014	0.052	0.0116	0.1016	0.01	0.0112	0.0672	0.0024	0.0036	0.036	0.2508	0.0044	0.0176	0.0036
0.0548	0.0144	0.2048	0.0228	0.0172	0.0024	0.012	0.0152	0.0004	0.1812	0.0304	0.0108	0.0016	0.0496	0.018	0.0228	0.0028	0.0272	0.0356	0.0732	0.0672	0.0292	0.0476	0.0016	0.0248	7.074	0.0036	0.016	0.0248	0.0016	0.2832	0.0212	0.0004	0.0032	0.014	0.0232	0.0144	0.246	0.0112	0.0128	0.0244	0.0048	0.1876	0.0856	0.002	0.0024	0.0156	0.1904
0.0148	0.0076	0.018	0.004	0.0096	0.0128	0.016	0.0248	0.0088	0.04	0.052	0.0024	0.0164	0.0104	0.0112	0.0068	0.854	0.0116	0.0284	0.0108	0.0456	0.0032	0.0108	0.0024	0.0584	0.018	0.2428	0.0008	0.0584	0.1552	0.1928	0.0116	0.0136	0.0132	0.014	0.018	0.0812	0.016	0.0128	0.0168	0.4492	0.0224	0.0732	0.002	0.0228	0.1104	0.0472	0.0432
0.014	0.0004	0.0216	0.0036	0.0004	0.0004	0.0132	0.0016	0.7592	0.0016	0.0172	0.0624	0.0272	0.1256	0.0072	0.0584	0.0064	0.0132	0.0608	0.0072	0.0072	0.0696	0.0768	0.082	0.0108	0.012	0.1676	0.1	0.0108	0.122	0.1212	0.0328	0.0004	0.0384	0.0148	0.0156	0.0144	0.0092	0.012	0.0164	0.0872	0.0024	0.0396	0.0276	0.2052	0.058	0.0004	4.3044
0.0248	0.3356	0.0296	0.054	0.03	0.0008	0.01	0.0176	0.0004	0.158	0.0064	0.0032	0.0092	0.2724	0.7768	0.0076	0.0164	0.0656	0.01	0.2768	0.0032	0.004	0.0144	0.0144	0.0008	1.284	0.0008	0.0324	0.0008	0.1364	0.0008	0.0108	0.1512	0.0116	0.0084	0.0252	0.0072	0.004	0.0148	0.0368	8.6812	0.0008	0.0668	0.0056	1.292	0.1136	8.0596	1.3876
0.0004	0.0056	0.0104	0.1656	0.0484	0.0328	0.0308	0.0132	2.2248	0.0052	0.0872	1.284	0.0096	0.0028	0.304	0.0052	0.004	0.004	0.2252	0.0008	0.0064	0.0112	0.012	0.176	0.1572	0.0012	0.0236	0.0092	0.1572	0.0136	0.1448	0.002	0.3588	0.012	0.156	0.0076	0.0196	0.0132	0.0124	0.0104	0.046	0.0024	0.004	0.0044	0.1808	0.1016	0.0636	0.0308
0.0164	0.0004	0.0624	0.0064	0.0056	0.012	0.0464	0.014	0.0324	2.178	0.01	0.064	0.0056	0.5784	0.036	0.0004	0.5176	0.0172	0.3292	0.0084	0.0132	0.0712	0.0768	0.0112	0.7032	0.0124	0.0072	0.0572	0.7032	0.1216	0.0652	0.0224	0.0056	0.002	0.014	0.0052	0.0124	0.0048	0.0108	0.0056	0.0004	0.006	0.218	0.1044	0.0004	0.0696	0.1004	0.0012
0.0124	0.0432	0.0024	0.1116	0.0144	0.1096	0.0164	0.0104	0.0304	0.058	0.0364	0.4636	0.1228	0.0468	0.016	0.0096	0.1992	0.0116	0.0056	0.016	0.0004	0.0128	0.0124	0.1056	0.2692	0.0028	0.2132	0.0348	0.2692	0.03	0.046	0.0456	0.012	0.0132	0.012	0.0652	0.0068	0.064	0.0136	0.0156	0.0392	0.006	0.0016	0.0348	0.004	0.116	0.0208	0.0116
0.0332	0.0188	0.01	0.0008	0.0116	0.0184	0.0192	0.0544	0.0744	0.0032	0.0052	0.06	0.2612	0.0004	0.014	0.0456	0.0436	0.1108	0.0332	0.1064	0.0416	0.0156	0.0128	0.06	0.7136	0.0192	0.0004	0.0004	0.7136	0.0016	0.1436	0.0004	0.0192	0.0656	0.0336	0.1524	0.0164	1.1264	0.0112	0.0184	0.2044	0.0288	0.0336	0.0012	0.246	0.2772	0.03	0.016
0.0004	0.0024	0.008	0.0224	0.0284	0.006	0.0076	0.0152	0.0424	0.0156	0.1032	0.0408	0.038	0.0612	0.0232	0.012	0.01	0.0228	0.014	0.0028	0.0208	0.0004	0.0144	0.3348	0.0072	0.2884	1.24	1.1776	0.0072	0.0008	0.0508	0.0432	0.0344	0.0672	0.012	0.0132	0.058	0.0092	0.0136	0.0604	0.8716	0.008	0.01	0.82	0.0192	0.1292	1.4172	0.0068
0.1188	0.0056	0.0036	0.0008	0.0832	0.004	0.0204	0.0332	0.1412	0.0028	0.0172	0.0216	0.0188	0.0052	0.0208	0.0248	0.0044	0.014	0.0176	0.0536	0.0656	0.128	0.0136	0.7344	0.1	0.0056	0.7716	0.0016	0.14	0.026	0.008	0.0116	0.1092	0.1496	0.0068	0.0188	0.0128	0.0152	0.01	0.0176	0.0004	0.0024	0.0556	0.0112	0.118	0.0276	0.034	0.0156
0.0024	0.3616	0.012	0.0112	0.0032	0.0132	0.0124	0.0116	0.0412	0.0272	0.0068	0.0196	0.0176	0.0356	0.0204	0.0116	0.0044	0.0168	0.01	0.0348	0.004	0.126	0.0056	0.0016	0.212	0.0012	0.0076	0.012	0.212	0.0128	0.0116	0.0004	0.0496	0.0004	0.0024	0.0448	0.02	0.0104	0.0112	0.0152	0.1164	0.0116	0.1924	0.0116	0.0056	0.0276	0.2868	0.014
0.0156	0.1224	0.0016	0.0056	0.006	0.002	0.0148	0.0132	0.008	2.78	0.0104	0.8372	0.0144	0.0252	0.0232	0.016	0.018	0.0288	0.006	0.0048	0.0548	0.0704	0.0124	0.0168	0.0132	0.0068	0.0356	0.0904	0.0132	0.0216	1.5748	0.0004	0.0328	0.0192	0.0088	0.0052	0.0212	0.0136	0.0104	0.0116	0.0024	0.0608	0.1256	0.0384	0.1612	0.014	0.4864	0.0216
0.0076	0.0032	0.0112	0.0048	0.1616	0.0272	0.0248	0.0336	0.0172	0.0076	0.0068	0.0044	0.0196	0.0004	0.2004	0.0284	0.0156	0.0108	1.5972	0.0116	0.142	0.0132	0.0132	0.0108	0.68	0.0112	0.5072	0.124	0.684	0.0008	0.4196	0.0344	0.0048	0.0044	0.0028	0.0284	0.0268	0.0008	0.0128	0.0156	0.0384	0.0964	0.0556	0.07	0.0156	0.024	0.0088	0.1512
0.014	0.0224	0.0004	0.0204	0.014	0.0056	0.0632	0.014	0.01	0.004	0.0288	0.0228	0.0044	0.0016	0.0128	0.0056	0.0316	0.02	0.0452	0.0108	0.0024	0.0088	0.0128	0.0176	0.0008	0.0052	0.0868	1.1164	0.114	0.012	0.0132	0.086	0.0048	0.0052	0.0492	0.0096	0.0088	0.0116	0.0284	0.078	0.0304	0.0264	0.0712	0.0148	0.25	0.0468	0.014	0.0128
0.004	0.002	0.0184	0.0136	0.126	0.0492	0.0032	0.012	0.01	0.0028	0.0152	0.0012	0.0076	0.0016	6.74	0.0152	0.0212	0.03	0.014	0.1408	0.0324	0.01	0.0128	0.0124	0.062	0.4512	0.0248	0.0176	0.0622	0.0012	0.0008	0.002	0.038	0.0224	0.0156	0.0272	0.0068	0.022	0.0132	0.0128	0.2024	0.002	0.2388	0.2844	0.0272	0.2636	0.02	0.0944
0.028	0.022	0.0464	0.012	0.092	0.0092	0.03	0.0132	0.0304	0.2664	0.0164	0.036	0.0472	0.1056	0.0008	0.0456	0.054	0.0208	0.0112	0.0704	0.0168	0.0096	0.0124	0.0136	0.0408	0.4384	0.0076	0.0008	0.0408	0.0736	0.7716	0.006	0.104	0.0128	0.0092	0.014	0.0236	0.0132	0.0196	0.0132	0.0136	0.0756	0.1212	0.024	0.0528	0.0152	0.0164	0.0304
0.012	0.0128	0.0008	0.0472	0.016	0.0128	0.0584	0.0556	0.8308	0.0144	0.1564	0.0124	0.0288	0.0068	0.0116	0.016	0.0128	0.0612	0.0072	0.0348	0.01	0.0192	0.01	0.0108	0.3284	0.0132	0.0232	0.0084	0.3284	0.0936	0.0004	0.0184	0.002	0.0136	0.0008	0.0096	0.194	0.0592	0.006	0.0008	0.0052	0.0072	0.3444	0.0136	0.01	0.0068	0.0036	0.0148
0.106	0.0052	0.0176	0.0096	0.0736	0.0008	0.0188	0.012	0.0048	0.086	0.0068	0.0796	0.0256	0.052	0.0232	0.0424	0.0208	0.0224	0.028	0.0864	0.0344	0.0008	0.0132	0.0048	0.3168	0.0032	0.1688	0.0736	0.388	0.0524	0.0276	0.204	0.032	0.0268	0.004	0.0128	0.002	0.0076	0.0356	0.0004	0.0164	0.0004	0.0272	0.0156	0.03	0.0228	0.0252	0.0148
0.0204	0.018	0.0036	0.0312	0.0144	0.004	0.024	0.0132	0.032	0.0088	0.0036	0.3316	0.0036	0.328	0.0148	0.002	0.04	0.0596	0.0124	0.028	0.0008	0.0424	0.0216	0.0104	1.1604	0.2104	0.1492	0.0068	1.1604	0.002	0.2532	0.0232	0.0044	0.0188	0.0312	0.002	0.0036	0.0008	0.0552	0.0256	0.0064	0.0396	0.0036	0.0052	0.02	0.02	0.1388	0.2424
0.0736	0.0992	0.0152	0.0096	0.0296	0.0696	0.0128	0.0164	0.0032	0.0304	0.002	0.0004	0.0064	0.008	0.0112	0.026	0.0448	0.002	0.0468	0.0344	0.0164	0.026	0.0148	0.002	0.0048	0.0048	0.012	0.0236	0.0048	0.2264	0.2212	0.0252	0.0136	0.0032	0.0748	0.0164	0.0168	0.0064	0.0172	0.0116	0.002	0.02	0.032	0.0152	0.0692	0.058	0.1216	0.0116
0.0084	0.0328	0.0148	0.0104	0.014	0.0124	0.0288	0.0116	0.036	0.022	0.0392	0.008	0.0192	0.1804	1.102	0.0248	0.0444	0.0212	0.01	0.0144	0.0104	0.0192	0.0136	0.0092	0.0132	0.0024	0.0368	0.0112	0.0132	1.5368	0.02	0.0224	0.0068	0.008	0.01	0.1716	0.0096	0.1116	0.0124	0.0136	0.0268	0.0552	0.0156	0.0184	0.0008	0.0008	0.0212	0.0348
0.1108	0.0016	0.0032	0.0056	0.0316	0.0272	0.0124	0.012	0.0016	0.0064	0.0436	0.0152	0.0028	0.0148	0.0012	0.004	0.0196	0.0016	0.0164	0.0216	0.0168	0.0368	0.0128	0.0056	0.0024	0.0232	0.018	0.0364	0.0024	0.0008	0.0212	1.3276	0.0132	0.1732	0.004	0.0044	0.0168	0.1812	0.0164	0.012	0.002	0.1812	0.0508	0.3788	0.0076	0.01	0.004	0.0436
0.016	0.0204	0.0244	0.1904	0.0516	0.0344	0.0096	0.012	0.0168	0.006	0.0012	0.134	0.01	0.0072	0.01	0.0152	0.0144	0.0028	0.0232	0.2024	0.0176	0.372	0.0128	0.016	0.0244	0.056	0.0092	0.1116	0.0244	0.006	0.036	0.022	0.0124	0.0136	0.0244	0.0444	0.0076	0.0024	0.01	0.0148	0.0136	0.0112	0.0252	0.1168	0.006	0.048	0.0108	0.0104
0.0252	0.016	0.0052	0.0124	0.0044	0.0048	0.0144	0.0332	0.1104	0.0084	0.0256	0.0012	0.0088	0.004	0.1232	0.0212	0.0056	0.0024	0.0148	0.0108	0.0172	0.0472	0.0104	0.0052	0.0224	0.47	0.0004	0.0064	0.0224	0.0212	0.0136	0.0032	0.0008	0.006	0.0824	0.028	0.002	0.0204	0.0312	0.0084	0.0148	0.0116	0.0284	0.022	0.0012	0.002	0.0004	0.0132
0.0096	0.0564	0.0136	0.2672	0.2148	0.0164	0.0112	0.002	0.0064	1.9844	0.0152	0.0364	0.0044	0.0516	0.0032	0.0112	0.0104	0.0312	0.0056	0.0248	0.0864	0.6	0.0132	0.036	0.0064	0.0156	0.0056	0.1068	0.104	0.0124	0.0608	0.0144	0.3848	0.0048	0.01	0.0124	0.0092	0.0176	0.012	0.0208	1.71	0.0012	0.0052	0.0404	0.1312	0.0556	0.0068	0.1156
0.0168	0.0348	0.032	0.0088	0.0248	0.0144	0.0348	0.1132	0.116	0.0312	0.0084	0.026	0.0064	0.3688	0.0184	0.0124	0.2064	0.0288	0.016	0.1012	0.0048	0.0008	0.0184	0.0184	0.0576	0.826	0.0004	0.1412	0.01	0.0264	0.0224	0.0588	0.0012	0.0036	0.0588	0.0008	0.0236	0.0476	0.0144	0.01	0.0852	0.0148	0.0804	0.0512	0.0008	0.0356	0.028	0.0164
0.0076	0.0132	0.0132	0.0752	0.088	0.0056	0.0012	0.014	0.0068	0.0096	0.036	0.0024	0.002	0.1284	0.0268	0.044	0.0288	0.0316	0.0108	0.0136	0.0364	0.0088	0.0104	0.026	0.0148	0.374	0.0124	0.0132	0.032	0.1316	0.1552	0.006	0.058	0.0016	0.02	0.008	0.0112	0.0188	0.0096	0.0112	0.2464	0.0284	0.0372	0.032	0.0144	0.0332	0.0072	0.018
0.0144	0.0052	0.008	0.0016	0.014	0.0124	0.0256	0.0172	0.0012	0.4888	0.006	0.0592	0.0248	0.0024	0.0196	0.032	0.0076	0.006	0.0148	0.0132	0.0072	0.034	0.012	0.0268	13.1544	0.0004	0.0128	0.0396	0.2592	0.0208	0.0476	0.0044	0.2048	0.0528	0.0324	0.0292	0.0136	0.0124	0.014	0.0204	0.0868	0.0148	0.0928	0.0228	0.008	0.0432	0.0024	0.0056
0.01	0.0048	0.0216	0.0056	0.0044	0.012	0.0296	0.0064	0.0344	2.1704	0.0108	0.0116	0.0728	0.0076	0.0112	0.0396	0.0084	0.0076	0.0404	0.0244	0.9172	0.004	0.0112	0.0008	0.0004	0.122	0.084	0.0016	0.022	0.018	0.0176	0.0104	0.0524	0.0092	0.0472	0.0752	0.0128	0.0132	0.0128	0.0148	0.0316	0.0752	0.3248	0.0152	0.002	0.0168	0.02	0.0152
0.0012	0.0036	0.0248	0.0064	0.0172	0.0044	0.006	0.0088	0.104	0.006	0.012	0.018	0.1388	0.0036	0.0312	0.0136	0.0232	0.006	0.0056	0.0824	0.0032	0.0128	0.0124	0.0128	0.0124	0.0404	0.0676	0.012	0.0124	0.1676	0.0292	31.9024	0.0088	0.0068	0.0128	1.1	0.0212	0.0388	0.0136	0.0144	0.002	0.024	0.0132	0.0136	0.0292	0.136	0.0816	0.0236
0.9692	0.0012	0.0072	0.0196	0.056	0.0164	0.0128	0.0228	0.1436	0.0484	0.0516	0.0304	0.0192	0.018	0.0096	0.0144	0.006	0.0076	0.0216	0.0068	0.0188	0.0112	0.0144	0.0168	0.0832	0.0816	0.0224	0.0092	0.0832	0.008	0.0676	0.0452	0.0032	0.0236	0.012	0.01	0.0352	0.0188	0.0132	0.014	0.1048	0.0168	0.0112	0.9248	0.0164	0.2984	0.05	0.164
0.0224	0.0128	0.0328	0.0092	0.0232	0.01	0.0092	0.0152	0.1712	0.024	0.0148	0.0204	0.0044	0.0256	0.0036	0.0488	0.0208	0.0296	0.0156	0.0144	0.018	0.0124	0.0136	0.1188	0.0992	0.0096	0.0408	0.0072	0.0992	0.0924	0.0272	0.0128	0.0012	0.0008	0.014	0.0112	0.0472	0.0132	0.0112	0.0164	0.0044	0.0048	0.0308	0.0704	0.0004	0.0476	0.122	0.0188
0.018	0.0084	0.0176	0.0204	0.0096	0.0104	0.0816	0.0124	0.0468	1.0756	0.0088	0.0064	0.1392	0.1428	0.0192	0.0156	0.0008	0.0116	0.0084	0.0232	0.0284	0.0216	0.0144	0.0096	0.0108	0.0376	0.0476	0.0932	0.0108	0.496	0.0268	0.0004	0.0064	0.0004	0.0172	0.07	0.0212	0.0116	0.0124	0.1004	0.1656	0.0088	0.0056	0.3444	0.0004	0.0348	0.0776	0.0152
0.0116	0.0032	0.0252	0.008	0.012	0.0792	0.01	0.0428	0.1144	0.0176	0.02	0.6756	0.0136	0.004	0.0184	0.0112	0.1352	0.0016	0.002	0.0208	0.0524	0.0232	0.0136	0.0888	0.0024	0.2452	0.1724	5.0612	0.0024	0.5084	0.02	0.0004	0.0244	0.0032	0.0048	0.0512	0.012	0.0328	0.0112	0.0144	0.0184	0.1548	0.0592	0.004	0.0632	0.0104	0.0036	0.1696
0.002	0.0524	0.0772	0.0136	0.0068	0.02	0.0128	0.0128	0.0396	1.6684	0.0004	0.144	0.0132	0.01	0.0088	0.0604	0.024	0.0196	0.0148	0.0004	0.0016	0.046	0.012	0.0464	9.3076	0.0012	0.01	0.0364	9.3076	0.0176	0.0264	0.0052	0.0112	0.0164	0.0032	0.0156	0.0188	0.0756	0.0272	0.0356	0.3884	0.016	0.0388	0.0552	0.0848	0.0008	0.0024	0.0076
0.1044	0.0244	0.0092	0.0044	0.0016	0.0068	0.0144	0.012	0.0048	0.3412	0.0168	0.014	0.0768	0.0008	0.0944	0.0012	0.0016	0.0148	0.006	0.0112	0.0116	0.2728	0.0112	0.0048	0.2052	0.0444	0.0012	0.8076	0.2052	0.0184	0.0208	0.0164	0.0396	0.0008	0.0704	0.0044	0.0016	0.0056	0.01	0.0212	0.0004	0.036	0.0732	0.0076	0.0016	0.0644	0.0296	0.0252
0.0412	0.0068	0.0276	0.0044	0.0464	0.0136	0.0744	0.0196	0.0168	0.2304	0.2472	0.132	0.2076	0.0028	0.0052	0.0236	0.0032	0.0052	0.0204	0.012	0.6648	0.0072	0.01	0.0188	0.7448	0.096	0.38	0.38	0.7448	0.0244	0.9452	0.0024	0.5596	0.0236	0.0164	0.1192	0.0128	0.0272	0.016	0.0124	0.0084	0.0684	0.0348	0.0012	0.0004	0.0228	0.0056	0.0124
0.1068	0.0632	0.022	0.0252	0.012	0.1396	0.012	0.0108	0.0028	0.6504	0.0024	0.0508	0.0016	0.1172	3.402	0.006	0.0232	0.0012	1.8276	0.0108	0.0096	0.0052	0.0136	0.0152	0.034	0.0712	0.0248	0.0032	0.0346	0.0096	0.0136	0.0068	0.0236	0.0096	0.0156	0.016	0.0148	0.0008	0.024	0.016	0.0052	0.01	0.032	0.6236	0.0008	0.0036	0.1304	0.0096
0.0032	0.0108	0.026	0.1112	0.0116	0.022	0.0132	0.0252	0.6176	0.004	0.0076	0.2648	0.0096	0.4648	0.04	0.0168	0.016	0.072	0.0188	0.0104	0.0152	0.0024	0.03	0.0024	0.0048	0.0632	1.4536	0.0004	0.0048	0.082	0.0132	0.0168	0.0064	0.0008	0.0392	0.018	0.0132	0.014	0.002	0.0104	0.0348	0.0224	0.012	0.0424	0.0996	0.0192	0.0616	0.0088
0.0884	0.0008	0.0096	0.0596	0.0184	0.0136	0.314	0.0128	0.0064	0.026	0.0208	0.0324	0.0056	0.0308	0.0156	0.0144	0.0068	0.02	0.1616	0.1868	0.0244	0.2592	0.014	0.2388	0.0056	0.0024	0.0068	0.0536	0.006	0.0172	0.006	0.0304	0.0136	0.0384	0.0208	0.008	0.002	0.0128		0.022	0.0268	0.256	0.0072	0.002	0.1344	0.0836	0.1244	0.0128
0.018	0.0064	0.02	0.0192	0.0164	0.136	0.0164	0.01	0.06	0.1864	0.0276	0.01	0.5884	2.5072	0.1408	0.0136	0.0008	0.0772	0.0128	0.028	0.1372	0.046	0.0112	0.0468	0.0144	0.3576	0.038	0.0004	0.0144	0.0056	0.0112	0.0192	0.3572	0.014	0.0416	0.012	0.0092	0.0112		0.012	0.0056	0.0784	0.1284	0.5112	0.6668	0.7692	0.02	0.046
0.0164	0.0448	0.0128	0.0256	0.0268	0.0172	0.0116	0.0168	0.024	0.0248	0.014	0.014	0.0188	0.0836	0.012	0.0384	0.0076	0.0268	0.0104	0.012	0.0384	0.0076	0.014	0.1092	0.7512	0.0108	0.0104	0.0276	0.004	0.0296	0.0276	0.0404	0.44	0.0164	0.0088	0.0208	0.0112	0.1964		0.0172	0.302	0.0388	0.1676	0.1244	0.1036	0.4808	0.0704	0.026
0.0056	0.0904	0.0056	0.0056	0.1752	0.0004	0.0204	0.0248	0.222	0.0156	0.0024	0.2788	0.0192	1.0572	0.0152	0.0288	0.0032	0.0336	0.0484	0.0084	0.0548	0.006	0.012	0.0128	0.0668	0.7416	0.0036	0.022	0.0668	0.0284	0.09	0.0164	0.0212	0.0032	0.0112	0.0124	0.0028	0.01		0.0164	0.6356	0.0084	0.024	0.0004	0.0004	0.028	0.0184	0.0132
0.0464	0.3312	0.0016	0.0296	0.0092	0.1244	0.0132	0.0124	0.1572	0.0244	0.0024	0.0044	0.004	0.0284	0.0152	0.0092	0.0604	0.0708	0.0524	0.0112	0.1064	0.0112	0.0244	0.0048	0.064	0.01	0.0004	0.0076	0.0648	0.0736	0.0016	0.0048	0.076	0.0088	0.0044	0.002	0.2332	0.0108		0.0136	0.0112	0.0804	0.01	0.2836	0.1624	1.6756	0.0944	0.0196
0.014	0.0124	0.0152	0.0128	0.0216	0.02	0.0148	0.0128	0.0904	0.2744	0.022	0.0124	0.0004	0.0152	0.0128	0.0184	2.5708	0.0396	0.1164	0.0648	0.0728	0.0004	0.0584	0.0516	0.0868	0.0052	0.0276	0.0056	0.0868	0.1184	0.008	0.0544	0.0016	0.0108	0.062	0.0128	0.0108	1.6744		0.0156	0.0584	0.0168	0.0224	5.8856	0.0004	0.1312	0.0064	0.014
0.0124	0.0316	0.0088	0.0156	0.0124	0.0012	0.0172	0.02	0.0392	0.0156	0.0092	0.0172	0.484	0.0024	0.0232	0.016	0.0076	0.0056	0.0172	0.0108	0.0124	0.0092	0.0652	0.0196	0.0736	0.052	0.0004	0.0024	0.0736	0.6488	0.0096	0.0192	0.0092	0.012	0.0524	0.006	0.1636	0.0552		0.006	0.2	0.5344	0.0432	0.0436	0.2044	0.0004	0.1424	0.0548
0.0224	0.0092	0.0164	0.0116	0.0432	0.0144	0.0168	0.1492	0.752	0.0004	0.4352	1.4824	0.0124	0.0044	0.0248	0.0324	0.0056	0.0084	0.012	0.158	0.0004	0.2336	0.0104	0.0096	0.0468	0.0024	0.1508	0.0004	0.0468	0.0708	0.0052	0.0616	0.0112	0.028	0.0092	0.0216	0.0056	0.0312		0.0212	0.0008	0.0104	0.0144	0.0044	2.2216	0.0052	0.0024	0.0008
0.1072	0.0024	0.0216	0.0144	0.0208	0.0084	0.01	0.0112	0.3452	0.0124	0.0004	0.1148	0.008	0.0024	0.0136	0.0164	0.0088	0.0112	0.008	0.032	0.068	0.0128	0.0136	0.1524	1.3924	0.0232	0.01	0.0104	1.3924	0.0124	0.0116	0.01	0.018	0.0396	0.0136	0.004	0.004	0.0008		0.0116	0.0024	0.0096	0.5712	0.1256	0.0124	0.0672	0.0084	0.2568
0.0176	0.0144	0.0124	0.0092	0.0068	0.1104	0.008	0.0252	0.0028	0.0496	0.0732	0.0132	0.0036	0.0184	0.0216	0.0288	0.002	0.0116	0.0316	0.0548	0.0584	0.02	0.016	0.0004	0.01	0.1656	0.0004	0.1312	0.0104	0.0048	0.0048	0.0604	0.0012	0.0184	0.01	0.0184	0.0208	0.0012		0.0296	0.0204	0.2304	0.008	0.0184	0.03	1.5328	0.0588	0.0132
0.0364	0.0148	0.02	0.0104	0.0084	0.016	0.0116	0.0116	0.0328	0.2516	0.0012	0.2768	0.0016	0.0112	0.0144	0.0344	0.0032	0.0008	0.0096	0.0064	0.0024	0.0004	0.0128	0.0076	0.5848	0.2004	0.0048	0.0024	0.02	0.0084	0.0024	0.0852	0.012	0.022	0.2576	0.0056	0.0208	0.0972		0.012	0.0148	0.0024	0.0184	0.1472	0.0704	0.022	0.0136	0.0148
0.0152	0.0012	0.4316	0.0152	0.016	0.0148	0.0148	0.014	0.0652	0.0004	0.0584	0.094	0.0596	0.0216	2.1584	0.0036	0.0108	0.0252	0.0284	0.0024	0.1032	0.0576	0.0128	0.0124	0.1244	0.3004	0.1512	0.01	0.1244	0.0024	0.0432	0.0564	0.0192	0.0036	0.016	0.0052	0.0068	0.0004		0.0164	0.0744	0.0252	0.0724	0.0096	0.0228	0.0228	0.1896	0.0096
0.0104	0.012	0.0116	0.0424	0.0132	0.0424	0.0172	0.0136	0.0828	0.3348	0.0244	0.1124	0.0348	0.1244	0.0016	0.0064	0.0012	0.0004	0.0112	0.022	0.012	0.0668	0.0124	0.0188	0.0152	0.016	0.02	0.0084	0.0152	0.044	0.0356	0.0688	0.0156	0.2428	0.0624	0.0156	0.0004	0.0364		0.016	0.0024	0.246	0.0208	0.0472	0.3328	0.024	0.006	0.024
0.0172	0.0368	0.0124	0.0132	0.0304	0.004	0.012	0.1644	0.0436	0.0172	0.0348	0.002	0.0004	0.0412	0.0288	0.012	0.0784	0.0008	0.0132	0.0008	0.0072	0.014	0.0128	0.0072	0.0104	0.0084	0.0144	0.0256	0.006	0.0192	0.0236	0.008	0.0016	0.02	0.1584	0.0076	0.1464	0.0048		0.0104	0.018	0.3312	0.044	0.0156	0.0152	0.2984	1.3372	0.0144
0.0016	0.0016	0.0124	0.032	0.0136	0.026	0.01	0.0112	0.0016	0.0024	0.0172	0.0052	0.0612	0.4856	0.0004	0.012	0.324	0.0312	0.0016	0.0092	0.218	0.0156	0.0104	0.0236	0.0092	0.0064	0.0592	0.0036	0.032	0.0428	0.0204	0.002	0.0112	0.0176	0.012	0.012	0.014	0.0284		0.0232	0.0268	0.0156	0.3984	0.0016	0.0032	0.1292	0.0196	0.0272
0.0456	0.2276	0.0148	0.0064	0.0124	0.014	0.0128	0.0172	0.0024	0.0016	0.0192	0.0024	0.02	0.0004	0.0168	0.0204	0.0232	0.0052	0.004	0.0112	0.0168	0.0092	0.0224	0.0028	0.0012	0.0016	0.0016	0.002	0.0012	0.0072	0.062	0.0516	0.0388	0.0128	0.014	0.0096	0.0004	0.1772		0.022	0.1156	0.0004	0.1304	0.0488	0.0488	0.0084	0.0112	0.0004
0.0256	0.0248	0.012	0.0748	0.0088	0.0268	0.01	0.0576	0.0356	0.2084	0.0288	0.0224	0.0224	0.0132	0.0696	0.0132	0.022	0.0128	0.0104	0.0192	0.002	0.026	0.0124	0.1304	0.0004	0.0244	0.0444	0.0288	0.0004	0.0212	0.006	0.0084	0.0024	0.0048	0.016	0.0068	0.022	0.0888		0.0208	0.0084	0.1232	0.0468	0.0144	0.0908	0.0184	0.0004	0.008
0.0472	0.0008	0.0712	0.2424	0.048	0.0104	0.0132	0.0236	0.0248	0.118	0.2476	0.0148	0.0604	0.6356	0.02	0.0116	0.0108	0.0156	0.004	0.0344	1.0636	0.0004	0.0676	0.0192	0.0232	2.8264	0.0164	0.142	0.0232	0.0808	0.0032	0.0112	0.1892	0.0076	0.0416	0.0276	0.008	0.0092		0.0084	0.01	0.0552	0.0144	0.002	0.002	0.0028	1.2048	0.006
0.0152	0.116	0.1324	0.0088	0.006	0.0128	0.0228	0.0124	0.0084	0.026	0.0356	0.046	0.0088	0.0184	0.0292	0.0208	0.9992	0.0004	0.014	0.0088	0.1048	0.0412	0.012	0.0032	0.0044	0.0004	0.0128	0.0028	0.0044	0.0216	0.0004	0.0236	0.0176	0.0148	0.0136	0.0028	0.0084	0.0296		0.0948	0.076	0.008	0.0012	0.01	0.068	0.042	0.0148	0.0048
0.026	0.002	0.0736	0.006	0.018	0.1036	0.0208	0.0112	0.074	0.0836	0.0104	0.0036	0.0204	0.0128	0.0192	0.01	0.0016	0.0172	0.0232	0.0512	0.036	0.0364	0.0184	0.0184	0.048	0.024	0.0088	0.0228	0.0488	0.1004	0.1076	0.012	0.0288	0.01	0.0076	0.0336	0.1044	0.0456		0.0212	0.006	0.1012	0.0816	0.0168	0.0636	0.0224	0.0048	0.0016
0.0556	0.0004	0.0756	0.0052	0.0548	0.0624	0.02	0.0088	2.9356	0.1776	0.0096	0.0064	0.0072	0.5096	0.0208	0.014	0.4404	0.0132	0.0188	0.012	0.0124	0.0152	0.0136	0.006	0.0008	0.1212	0.0136	0.1216	0.0008	0.0268	0.016	0.0208	0.0128	0.008	0.0156	0.0196	0.0008	0.0128		0.02	0.0068	0.094	0.0156	0.7912	0.0056	0.0368	0.0028	0.016
0.0236	0.0292	0.0192	0.0156	0.0628	0.0416	0.01	0.0184	0.0304	0.0148	0.0864	0.026	0.0276	0.002	0.0224	0.4424	0.1668	0.0124	0.0204	0.0132	0.01	0.0148	0.0108	0.0144	0.0004	0.0568	0.1312	0.0032	0.0004	0.0052	0.0052	0.048	0.0044	0.0116	0.0644	0.014	0.02	0.0132		0.038	0.1076	0.0384	0.0244	0.1988	0.0168	0.0008	0.0112	0.0176
0.062	0.0124	0.006	0.0176	0.022	0.048	0.008	0.1544	0.0464	0.076	0.016	0.0004	0.06	0.0276	0.012	0.014	0.006	0.002	0.0092	0.2052	0.008	0.0516	0.0112	0.0076	0.0088	0.1112	0.04	0.4988	0.0088	0.0148	0.0088	0.0048	0.0772	0.2892	0.004	0.0136	0.0076	0.0176		0.0128	0.0028	0.0212	0.0032	0.0312	0.0148	0.0024	0.1012	0.0056
0.0296	0.006	0.01	0.0192	0.0204	0.0284	0.0184	0.0504	0.012	0.0016	0.122	0.0028	0.1148	0.0108	0.0144	0.0084	0.0288	0.0572	0.0632	0.0032	0.0044	0.0044	0.0316	4.1288	0.04	0.01	0.1012	0.1412	0.0496	0.0052	0.0376	0.338	0.134	0.0328	0.014	0.0772	0.0036	0.2612		0.012	0.7236	0.4796	0.9748	0.108	0.0364	0.0116	0.0036	0.0336
0.004	0.0676	0.0056	0.0184	0.0156	0.0412	0.0648	0.0088	0.2692	0.0456	0.0168	0.0004	0.1976	0.01	0.0128	0.012	0.0052	0.0056	0.002	0.0396	0.0344	0.0436	0.048	0.0084	0.0004	0.2504	1.0948	1.592	0.0004	0.0096	0.0336	0.5844	0.0004	0.0096	0.0208	0.0244	0.014	0.1232		0.0232	0.0544	0.0368	0.038	0.3188	0.2808	0.012	0.0128	0.0088
0.024	0.0024	0.008	0.0172	0.0416	0.0796	0.0116	0.0396	0.1564	23.2456	0.0064	0.0252	0.0056	0.0116	0.0132	0.0208	0.2108	0.0244	0.0136	0.0016	0.0316	0.0132	0.014	0.0012	0.0096	0.0036	0.3608	0.1532	0.0096	0.0084	0.1664	0.0188	0.0004	0.0024	0.0168	0.0032	0.0492	0.1576		0.0056	0.386	0.0136	0.0096	0.272	0.5152	0.0816	0.03	0.102
0.022	0.0096	0.222	0.0328	0.0172	0.0028	0.03	0.0352	0.046	0.0504	0.3164	0.0076	0.5696	0.7348	0.0144	0.0068	0.0128	0.0244	0.184	0.6572	0.0116	0.0008	0.0152	0.0112	0.0056	0.0008	0.0816	0.034	0.0056	0.0016	0.1172	0.0256	0.0016	0.0068	0.0128	0.0476	0.0144	0.0088		0.0208	0.004	0.0028	0.0304	0.5284	0.1348	0.2504	0.0104	0.0088
0.034	0.0148	0.0124	0.0116	0.0108	0.0692	0.044	0.0216	0.0316	3.182	0.0016	0.0068	0.0896	0.0384	0.042	0.0572	0.0224	0.0292	0.0808	0.0012	0.0024	0.088	0.0104	0.0084	0.0788	0.0044	0.0388	2.56	0.0788	0.0172	0.006	0.0036	0.1772	0.028	0.0112	0.0168	0.0004	0.0052		0.01	1.092	0.066	3.7048	0.0028	1.4324	0.0032	0.0192	0.0136
0.0124	0.0952	0.0276	0.0272	0.0064	0.1088	0.0152	0.01	0.0056	0.0088	0.0324	0.0112	0.0068	0.0548	0.012	0.0124	0.0256	0.01	0.0016	0.0128	0.0348	0.0232	0.06	0.0124	0.0016	0.0016	0.0164	0.036	0.0016	0.0032	0.0604	0.0148	0.0732	0.0256	0.02	0.0064	0.0092	0.0092		0.012	0.012	0.0004	0.0184	0.006	0.2348	0.0604	0.0228	0.0112
0.078	0.0028	0.0136	0.0176	0.008	0.1028	0.0108	0.012	0.0212	0.0984	0.33	0.0132	0.0032	0.0528	0.4296	0.018	0.0036	0.024	0.002	0.0044	0.0108	0.0368	0.0356	0.0608	0.0152	1.9472	0.0092	0.5436	0.006	0.0036	0.01	0.0128	0.0152	0.0012	0.0172	0.0304	0.0272	0.1072		0.01	0.0148	0.0084	0.3852	0.0052	0.0068	0.6064	0.0092	0.002
0.0232	0.0048	0.0076	0.048	0.016	0.2716	0.01	0.0144	0.11	0.2692	0.1336	0.0008	0.4136	0.094	0.0188	0.0076	0.0052	0.0428	0.0128	0.0516	0.0832	0.016	0.01	0.1012	0.082	0.0228	0.0876	0.238	0.082	0.0136	0.01	0.02	0.0248	0.0116	0.0144	0.0124	0.0008	0.008		0.0228	0.3744	0.0988	0.1284	0.0024	0.036	0.05	0.8396	0.0296
0.0784	0.0272	0.0084	0.0008	0.0004	0.0448	0.0152	0.0224	0.0412	0.0092	0.076	0.28	0.0092	0.034	0.1276	0.008	0.06	0.0912	0.0088	0.0172	0.4028	0.0356	0.0128	0.0036	0.0024	0.0096	0.0304	0.0036	0.0024	0.0116	0.012	0.2816	0.0016	0.0012	0.0056	0.0284	0.0092	0.0424		0.022	0.0084	0.0164	0.032	1.4072	0.0112	0.0084	0.1412	0.0624
0.0172	0.0108	0.0096	0.01	0.0248	0.0224	0.0144	0.0016	0.3268	0.8504	0.0104	0.0168	0.022	1.5104	0.01	0.0228	0.0236	0.0348	0.0024	0.0052	0.0364	0.0004	0.038	0.2488	0.0268	0.0048	0.1648	0.0728	0.0268	0.0128	0.0272	0.0072	0.0044	0.0036	0.01	0.0132	0.0156	0.014		0.0128	0.0604	0.1068	0.018	0.0476	0.0152	0.5504	0.0512	0.0772
0.0028	0.0092	0.0192	0.0044	0.018	0.0104	0.0164	0.0136	0.16	0.0908	0.0108	0.0144	0.3676	0.2848	0.0248	0.0016	0.0824	0.0348	0.0148	0.0072	0.0028	0.0144	0.0168	0.0212	0.0232	0.0232	0.0288	0.042	0.0232	0.5548	0.042	0.0164	0.0124	0.008	0.0128	0.0328	0.0048	0.0508		0.0244	0.0308	0.0004	0.0008	0.166	0.0036	0.0184	0.102	0.0168
0.0324	0.0132	0.0136	0.0076	0.0104	0.01	0.0172	0.014	1.404	0.0096	0.0284	0.0004	0.0284	0.01	0.012	0.0164	0.006	0.0124	0.01	0.0048	0.1316	0.008	0.0136	0.0132	0.0104	0.0168	0.1016	0.0028	0.0104	0.0436	0.0204	0.078	0.0588	0.0036	0.016	0.0112	0.0172	0.068		0.0156	0.044	0.2788	0.0168	0.0116	0.0004	0.1484	0.0392	0.0032
0.05	0.0304	0.1088	0.004	0.0004	0.0572	0.006	0.3572	1.6404	0.0436	0.0048	0.012	0.042	0.5616	0.0164	0.0072	0.0108	0.0032	0.0116	0.0132	0.0104	0.0252	0.0116	0.0164	0.0284	0.0084	0.0108	0.0076	0.0284	0.0248	0.0264	0.0132	0.0212	0.1012	0.0112	0.0332	0.0928	0.0196		0.0096	0.0048	0.0024	0.0208	0.0004	0.018	0.0916	0.0132	0.038
0.034	0.1688	0.084	0.0124	0.0008	0.012	0.034	0.0032	0.0164	0.0152	0.0064	0.014	0.1232	0.0004	0.0032	0.0164	0.0252	0.0088	0.058	0.0088	0.0032	0.0048	0.012	0.012	0.0232	0.0508	0.2896	1.8792	0.0232	0.018	0.0448	0.288	0.0252	0.072	0.002	0.006	0.0028	0.0696		0.0024	0.0308	0.0404	0.006	0.01	0.0544	1.3948	0.0828	0.0128
0.0124	0.0388	0.0116	0.0088	0.0116	0.0736	0.0112	0.0136	0.0148	0.0368	0.0084	0.0148	0.008	0.002	0.0072	0.048	0.09	0.014	0.0212	0.01	0.0092	0.0436	0.012	0.0148	0.024	0.0136	0.0996	0.0404	0.0246	0.0096	0.0028	0.0116	0.3556	0.0488	0.0064	0.0384	0.0052	0.0112		0.0136	0.0028	0.0108	0.0124	0.0784	0.0048	0.0464	0.0016	0.0084
0.0816	0.0352	0.0492	0.0136	0.1328	0.0028	0.0124	0.0116	0.2448	0.1048	0.0108	0.0012	0.0044	0.3472	0.0464	0.0152	0.0916	0.0112	0.01	0.0152	0.056	0.0136	0.0064	0.0096	0.0032	0.0388	0.0228	0.0032	0.0032	0.1508	0.1064	0.1108	0.0264	0.01	0.018	0.01	0.0136	0.0248		0.01	0.0052	0.2776	0.0016	0.0248	0.0628	0.0008	0.0012	0.0256
0.0156	0.0116	0.0112	0.1364	0.0008	0.0512	0.0252	0.0128	0.1804	0.0072	0.0316	0.046	0.0136	0.1048	0.0188	0.0268	0.0124	0.0164	0.0192	0.0172	0.0172	0.0052	0.0108	0.0052	0.1012	0.0012	0.0432	0.0484	0.1012	0.026	0.0004	0.0068	0.0164	0.0116	0.1412	0.0192	0.012	0.0164		0.012	0.038	0.0408	0.1588	0.0012	0.0096	0.3048	0.0016	0.0164
0.0052	0.0012	0.008	0.0164	0.002	0.0196	0.0124	0.0164	0.0024	0.0024	0.0156	0.0096	0.0232	1.1788	0.0056	0.014	0.01	0.012	0.0012	0.0876	0.0172	0.0232	0.012	0.006	0.0088	0.1716	0.1052	0.0368	0.0088	0.0028	0.0268	0.0024	0.0148	0.0036	0.0128	0.002	0.0132	2.01		0.0432	0.0112	0.0004	0.0236	0.0524	0.0152	0.0136	0.0032	0.0136
0.0148	0.0224	0.0164	0.0124	0.044	0.0136	0.0248	0.0152	0.0832	0.0164	0.0008	0.0232	5.7416	0.0016	0.0632	0.0252	0.0196	0.0632	0.0132	0.0188	0.328	0.0004	0.014	0.0168	0.0072	0.0012	0.7808	0.0292	0.0072	0.0252	0.0192	0.2416	0.0184	0.01	0.0168	0.0788	0.0068	0.002		0.0252	0.0092	0.0592	0.3684	0.0092	0.0192	0.0528	0.0124	0.0232
0.0224	0.0164	0.016	0.0584	0.0004	0.01	0.0092	0.0104	0.0104	0.0252	0.0364	13.8892	0.006	0.0004	0.004	0.0128	0.004	0.002	0.0124	0.0116	0.0052	0.0112	0.018	0.0464	0.0612	0.1312	0.0792	0.0028	0.0612	0.0224	0.0224	0.012	0.0364	0.0032	0.0032	0.01	0.0456	0.0128		0.0156	0.0164	0.014	0.2656	0.0096	0.0332	0.0048	0.016	0.01
0.0336	0.0232	0.0144	0.0356	0.0192	0.0476	0.0124	0.014	0.0112	2.6244	0.1108	0.028	0.0432	0.0004	0.5752	0.006	0.0068	0.0292	0.004	0.0264	0.0444	0.012	0.01	0.018	0.106	0.0412	0.002	0.002	0.1068	0.1228	0.086	0.0236	0.4272	0.0136	0.0904	0.0392	0.0212	0.0052		0.0168	0.0008	0.0676	0.0232	0.0492	0.4404	0.0448	0.002	0.0208
0.0104	0.0104	0.0064	0.0092	0.152	0.0092	0.1824	0.0064	0.0396	0.0132	0.0824	0.076	0.0508	0.1932	0.0068	0.0104	0.0112	0.1204	0.014	0.0128	0.0616	0.0128	0.0128	0.0356	0.0688	0.0284	0.022	0.1988	0.0688	0.228	0.0348	0.0108	0.018	0.0156	0.0148	0.0128	0.0408	0.0076		0.012	0.5624	0.0008	0.014	0.0088	0.194	0.4128	0.0412	0.0104
0.0128	0.0384	0.0452	0.0168	0.03	0.1572	0.0232	0.0124	0.0096	0.106	0.008	0.152	0.0008	0.0044	0.0776	0.0248	0.01	0.0324	0.0268	0.5432	0.0356	0.0104	0.0384	0.0332	0.1232	0.0084	0.6588	0.594	0.1232	0.0124	0.0316	0.0652	0.002	0.0028	0.0092	0.0188	0.006	0.0104		0.0128	0.0052	0.0004	0.0932	0.2216	0.0072	0.042	0.0244	0.0136
0.0884	0.0284	0.0044	0.0184	0.35	0.0008	0.012	0.052	0.1264	0.0412	0.1288	0.0308	0.0684	0.0004	0.0104	0.012	0.028	0.004	0.0316	0.1284	0.0152	0.0064	0.0116	0.0008	0.0044	0.0396	0.026	0.0004	0.0044	0.0772	0.012	0.1372	0.0096	0.014	0.0176	0.436	0.0164	0.0088		0.012	0.1304	0.0744	0.014	0.0208	0.018	0.0232	0.0036	0.0216
0.0092	0.0156	0.0112	0.052	0.0032	0.0108	0.0128	0.0176	0.4728	0.03	0.2616	0.0272	0.0136	0.0652	0.0236	0.018	0.0592	0.0064	0.018	0.012	0.0184	0.0068	0.036	0.1248	0.0032	0.0044	1.2056	0.0556	0.0032	0.0064	0.012	0.0004	0.0152	0.0124	0.0308	0.0108	0.0072	0.0168		0.0128	0.128	0.0024	0.0208	0.0344	0.0204	0.0884	0.0832	0.1948
0.0144	0.0008	0.0664	0.072	0.0476	0.0032	0.0164	0.0136	1.4628	0.04	0.0164	0.0224	0.12	0.0004	0.0116	0.004	0.0044	0.0148	0.008	0.0192	0.1104	0.0524	0.0288	0.0052	0.03	0.0524	0.0152	0.1468	0.0336	0.0312	0.0148	0.0048	0.008	0.0496	0.0148	0.016	0.0272	0.0992		0.0124	0.0832	0.0128	0.9836	0.012	0.016	0.0188	0.0072	0.006
0.0748	0.0116	0.0452	0.0328	0.0184	0.01	0.0176	0.0524	0.0368	0.0004	0.0068	5.9352	0.0024	0.3448	0.0312	0.0112	0.0028	0.0084	0.0128	0.0208	0.0116	0.0324	0.0696	0.0108	0.1104	0.0864	0.0168	0.0656	0.128	0.0076	0.0084	0.036	0.0104	0.4104	0.0064	0.004	0.0156	0.0008		0.018	0.0276	0.2568	0.028	0.0256	0.0216	0.006	0.0936	0.0212
0.108	0.008	0.0444	0.01	0.0388	0.0072	0.0012	0.01	0.0044	0.0128	0.0224	0.0076	0.0232	0.006	0.0176	0.0128	0.0004	0.006	0.0092	0.0008	0.0164	0.0436	0.0112	0.016	0.0284	0.0044	0.0136	0.0144	0.0284	0.0664	0.034	0.024	0.024	0.058	0.1	0.022	0.0208	0.0056		0.0132	0.0432	0.0208	0.584	0.0252	0.0152	0.0288	0.0104	0.0172
0.0072	0.0076	0.0236	0.0304	0.0012	0.008	0.0184	0.0092	0.0052	0.0012	0.0072	0.002	0.6408	0.0004	0.014	0.0096	0.0332	0.0152	0.0648	0.01	0.0044	0.0004	0.0268	0.0116	0.022	0.0252	0.0156	0.0116	0.0222	0.0136	0.0124	5.5236	0.0116	0.0244	0.0044	0.0004	0.0476	0.0072		0.01	0.1068	0.0056	0.0708	0.0032	0.1456	0.0144	3.9112	0.0332
0.036	0.0204	0.0044	0.038	0.0012	0.0516	0.0056	0.0124	0.0608	0.008	0.5624	185.556	0.1464	5.6564	0.0232	0.0148	0.13	0.0108	0.0168	0.0088	0.002	0.13	0.0076	0.004	0.1172	0.024	0.022	0.006	0.1172	0.0056	0.4632	0.3396	0.0116	0.0016	0.0156	0.0084	0.0172	0.0148		0.0372	0.3732	0.012	0.0204	0.0248	14.8152	0.0164	0.6144	0.0232
0.0144	0.0056	0.0048	0.0156	0.0088	0.0132	0.0148	0.0132	0.008	0.2056	0.0424	0.0368	0.0112	0.0004	0.0064	0.0948	0.0288	0.0128	0.0524	0.0556	0.0608	0.0712	0.0148	0.0124	0.0584	0.006	0.152	0.0024	0.0584	0.014	0.0244	2.112	0.008	0.0264	0.002	0.016	0.0388	0.1512		0.0224	0.0456	3.1588	0.046	0.0644	0.1336	0.0004	0.0924	0.024
0.0184	0.0124	0.012	0.0132	0.014	0.0136	0.03	0.0044	0.0708	0.0008	0.0136	0.0116	0.034	0.0036	0.01	0.2072	0.014	0.0564	0.0088	0.0128	0.002	0.0016	0.022	0.0248	0.0064	0.0224	0.0268	0.1204	0.0064	0.0804	0.05	0.0344	0.0052	0.0028	0.0388	0.0092	0.0156	0.0164		0.014	0.152	0.0416	0.004	0.0508	2.9796	0.012	0.0196	0.0372
0.0928	0.0016	0.0076	0.0076	0.0088	0.0036	0.024	0.0184	1.1752	0.0184	0.0136	0.002	0.0016	0.0172	0.0168	0.0556	0.0008	0.038	0.0156	0.1916	0.0108	0.0276	0.0144	0.026	0.0748	0.0088	0.0016	0.0444	0.0748	0.0012	0.0032	0.0176	0.0104	0.02	0.0804	0.0032	0.0164	0.0368		0.014	0.0388	0.0088	0.1056	0.0332	0.0284	0.134	0.0092	0.0096
0.0824	0.0336	0.0196	0.0024	0.0088	0.006	0.0128	0.0208	0.0188	0.0404	0.3604	0.0168	0.0388	0.3244	0.0128	0.0312	0.0308	0.0892	0.1216	0.0428	0.1196	0.0296	0.0132	0.0444	0.026	1.412	0.0264	0.176	0.0262	0.0112	0.0156	0.3388	0.0184	0.012	0.0196	0.0192	0.0296	0.0312		0.0276	0.4668	0.0136	0.0204	0.0004	0.0136	0.0292	0.0556	0.0216
0.0068	0.032	0.0116	0.002	0.0044	0.0012	0.028	0.02	0.024	0.0856	0.0016	0.0424	0.0048	0.0068	0.02	0.0612	0.0056	0.0128	0.0436	0.0332	0.046	0.0176	0.038	0.0068	0.0016	0.1044	0.0412	0.0072	0.0016	0.0036	0.0004	0.1364	0.0996	0.01	0.0196	0.0276	0.0124	0.0024		0.0352	1.1512	0.0156	0.0172	0.032	1.0152	0.2036	0.0088	0.0084
0.0092	0.2208	0.0116	0.0064	0.0088	0.4456	0.016	0.04	0.0036	0.0652	0.002	0.0344	0.0168	0.0288	0.02	0.0124	0.0052	0.0212	0.004	0.028	0.0412	0.0108	0.0136	0.0032	0.0064	0.002	0.0872	0.346	0.0064	1.012	0.0172	0.0052	0.014	0.0108	0.0208	0.0096	0.0148	0.022		0.0136	1.6632	0.0724	0.1052	0.1336	0.0068	0.0616	0.0148	0.0024
0.0012	0.096	0.0736	0.0144	0.1904	0.058	0.0128	0.03	0.012	0.0252	0.0064	0.0128	0.0292	0.0016	0.0856	0.04	0.042	0.0348	0.0136	0.0016	0.0276	0.0316	0.178	0.0552	0.0028	0.0128	0.028	0.3624	0.0028	0.0084	0.1036	0.0124	0.006	0.018	0.0068	0.0124	0.004	0.0512		0.0312	0.0276	0.8568	0.096	0.0128	0.0028	0.0132	0.0008	0.0112
0.3704	0.0112	0.0044	0.0192	0.0076	0.0232	0.0032	0.0124	0.0092	0.2136	0.0272	0.0092	0.01	0.0152	0.5624	0.0172	0.018	0.0204	0.0044	0.0216	0.0004	0.0124	0.012	0.0028	2.1888	0.0436	0.1236	0.0112	2.1888	0.006	0.008	0.0344	0.0152	0.012	0.0108	0.008	0.012	0.082		0.012	0.108	0.0808	0.0016	0.006	0.004	0.0308	0.0104	0.0112
0.0096	0.3472	0.0084	0.0068	0.0728	0.0152	0.004	0.0132	0.1096	0.3864	0.0432	0.0152	0.0192	0.048	0.0128	0.0456	0.0164	0.0172	0.018	0.0008	0.0444	0.0072	0.0136	0.0112	0.0004	0.2692	0.0136	0.0264	0.232	0.0252	0.0248	0.0808	0.0224	0.0108	0.0104	0.0156	0.0128	0.1464		0.0076	0.022	0.0688	0.0016	0.006	0.0524	0.2376	0.0384	0.0712
0.0472	0.0036	0.074	0.012	0.0464	0.012	0.0112	0.0112	0.0064	0.0892	0.0184	0.1044	0.012	0.0064	0.1464	0.0788	0.1832	0.0228	0.0172	0.0024	0.148	0.0004	0.0104	0.0288	0.0008	0.018	0.2876	0.0088	0.0008	0.0092	0.0092	0.0024	0.0092	0.0068	0.0372	0.0116	0.0188	0.0168		0.0232	0.008	0.1852	0.0364	0.0276	0.0624	0.0992	0.0292	0.0124
0.0032	0.01	0.008	0.002	0.0168	0.0072	0.0284	0.0152	2.452	0.0304	0.124	0.0188	0.0272	0.0804	0.008	0.022	0.3188	0.3704	0.0108	0.1252	0.016	0.0148	0.0104	0.008	0.0096	0.0756	0.0444	0.4408	0.0096	0.012	0.012	0.0408	0.012	0.0216	0.0124	0.018	0.0092	0.0124		0.0168	0.0304	0.2556	0.0132	0.1812	0.0364	0.1404	0.0256	0.0724
0.096	0.0164	0.0124	0.0148	0.0184	0.0328	0.0172	0.0156	0.0176	0.0056	0.006	0.0044	0.0168	0.0156	0.0128	0.0636	0.0216	0.0104	0.0604	0.0064	0.0128	0.0104	0.0164	0.202	0.0664	0.0044	0.0352	0.0904	0.0664	0.0148	0.0964	0.0032	0.0792	0.0136	0.0148	0.0736	0.0112	0.0028		0.0284	1.444	0.0068	0.0072	0.3532	0.024	0.0988	0.0004	0.1024
0.0092	0.028	0.0108	0.014	0.0052	0.0088	0.0212	0.0408	0.1656	0.0128	0.0116	0.0128	0.0252	0.066	0.0056	0.0096	0.0048	0.0032	0.0064	0.0004	0.0072	0.0504	0.0216	0.0504	0.0224	0.024	0.0116	0.0044	0.05	0.022	0.004	0.0196	0.0216	0.0152	0.0444	0.0124	0.0128	0.0872		0.0124	0.696	0.0192	1.6888	0.0024	0.0144	0.01	0.0012	0.0236
0.0944	0.0084	0.0028	0.1508	0.048	0.0132	0.0104	0.0116	0.1784	0.4044	0.0464	0.0276	0.022	0.0628	0.0108	0.302	0.0436	0.032	0.0016	0.0144	0.0212	0.0688	0.0128	0.0216	0.0848	0.0024	0.0348	9.1136	0.0848	0.0052	0.0052	0.006	0.0124	0.0216	0.0496	0.028	0.088	0.0004		0.0176	0.0016	0.0196	0.022	0.3136	0.0072	0.0284	0.0004	0.012
0.0004	0.0312	0.1684	0.004	0.0076	0.0204	0.01	0.0236	0.0008	0.0168	0.0416	0.0004	0.0156	0.1476	0.0192	0.0216	0.1528	0.0036	0.0204	0.0076	0.0492	0.1316	0.0296	0.0064	0.0004	0.0264	0.006	0.022	0.012	0.0156	0.02	0.0388	0.036	0.0068	0.0076	0.0312	0.0628	0.0528		0.01	0.3604	0.1668	0.02	0.0516	0.8008	0.0784	0.0024	0.0172
0.2312	0.1324	0.0204	0.012	0.028	0.0084	0.0168	0.012	0.0144	0.3756	0.014	0.0044	0.0188	0.0776	0.0012	0.0252	0.0052	0.004	0.1232	0.0312	0.0084	0.0064	0.0184	0.0828	0.0336	0.0516	0.0212	0.0148	0.0336	0.0048	0.0132	0.0044	0.0208	0.0096	0.008	0.2024	0.046	0.0152		0.0212	0.3584	0.002	0.0028	0.1856	0.0108	0.2248	0.004	0.0304
0.0708	0.0416	0.0096	0.0184	0.0004	0.018	0.0492	0.0156	0.02	0.5012	0.0004	0.008	0.008	0.1656	0.0388	0.0128	0.0128	0.026	0.0132	0.0164	0.0088	0.0144	0.0036	0.1016	0.0096	0.1816	0.02	0.8544	0.0096	0.0232	0.0144	0.0024	0.0008	0.0092	0.0188	0.01	0.0156	0.0116		0.0136	0.0428	0.2792	0.116	0.0396	1.546	0.0116	0.0004	0.0124
0.0312	0.0152	0.11	0.0168	0.0272	0.016	0.014	0.0028	0.0056	0.0192	0.0108	0.0008	0.016	0.0208	0.026	0.0612	0.572	0.0156	0.0184	0.0056	0.0292	0.0092	0.01	0.0032	0.0244	0.0156	0.0176	0.026	0.0244	0.0084	0.0276	0.1092	0.008	0.0148	0.126	0.0156	0.012	0.0028		0.0204	0.0204	0.0144	0.0012	0.0144	0.3552	0.0616	0.0208	0.01
0.1008	0.33	0.0176	0.0324	0.0196	0.2188	0.0176	0.0164	0.936	0.0452	0.0012	0.0104	0.0028	0.0968	0.012	0.0644	0.0012	0.0256	0.5508	0.006	0.0044	0.0336	0.0456	0.0192	0.1292	0.0004	0.012	0.0256	0.1292	0.0568	0.0128	0.0044	0.0228	0.0128	0.0204	0.0296	0.0068	0.0016		0.016	0.0112	0.0116	0.0892	0.434	0.0004	0.0008	0.3	0.1284
0.0052	0.0612	0.0116	0.0348	0.0244	0.0712	0.0152	0.3324	1.0288	0.0056	0.0228	0.1464	0.0088	0.076	0.0208	0.0452	0.0132	0.006	0.0184	0.0008	0.0052	0.0088	0.0192	0.0092	0.0416	1.3556	0.0176	0.0064	0.0416	0.0816	0.0036	0.0368	0.3388	0.03	0.016	0.0012	0.0112	0.0436		0.012	0.0072	0.0176	0.0004	0.0004	0.0316	0.0028	0.0112	0.1276
0.218	0.0112	0.0052	0.0036	0.0144	0.0356	0.0128	0.026	0.0024	0.0056	0.0564	0.026	0.0068	0.4192	0.008	0.0324	0.0524	0.0232	0.0144	0.0128	0.0712	0.0024	0.0836	0.0188	0.0004	0.0008	0.248	0.1616	0.01	1.4236	0.0032	0.0224	0.0504	0.0068	0.0376	0.0772	0.0104	0.0136		0.0452	0.0616	0.0692	0.0188	0.0016	0.036	0.0172	1.0744	0.0744
0.0568	0.0116	0.0076	0.0144	0.0596	0.0096	0.012	0.1	0.0532	0.0568	0.024	0.0128	0.0104	0.1684	0.0428	0.0072	0.0016	0.01	0.0492	0.0244	0.0036	0.0004	0.036	0.002	0.004	0.0056	0.034	0.0096	0.0044	0.0092	0.0096	0.0088	0.016	0.0108	0.0292	0.0084	0.0088	0.208		0.0256	0.0684	0.0608	0.0428	0.0024	0.0108	0.0064	1.064	0.012
0.0124	0.0112	0.0188	0.0216	0.002	0.0156	0.0256	0.0132	0.1972	0.0436	0.1256	0.0052	0.5908	0.4944	0.3408	0.0172	0.2144	0.0248	0.0156	0.1024	0.01	0.018	0.0004	0.0004	0.0264	0.0296	0.0048	0.0256	0.0264	0.0264	0.0116	0.0044	0.028	0.0092	0.076	0.0184	0.0092	0.0004		0.0104	0.02	0.0392	1.1964	0.002	0.0004	0.0204	0.072	0.026
0.0556	0.0012	0.0056	0.0628	0.1612	0.0104	0.014	0.01	0.008	0.1336	0.0368	0.0056	0.002	0.0412	0.1732	0.0048	0.002	0.0088	0.0128	0.0104	0.0136	0.0456	0.1468	0.0008	0.036	0.5504	0.002	0.064	0.0362	0.0016	0.0156	0.0056	0.0348	0.0104	0.0836	0.0132	0.012	0.012		0.0652	0.0108	0.0768	0.1064	0.0176	0.01	0.0044	0.1148	0.0196
0.0248	0.0532	0.0952	0.0028	0.084	0.0144	0.0076	0.0212	0.0188	0.3976	2.0336	0.1652	0.0696	0.2912	0.0144	0.01	0.1024	0.0108	0.0092	0.008	0.0272	0.0564	0.0068	0.0012	0.0184	0.1452	0.0244	0.0464	0.0184	5.4888	0.0232	0.2016	0.2032	0.01	0.042	0.0384	0.0032	0.012		0.0112	0.2676	0.0012	0.006	0.0856	0.02	0.0104	0.0048	0.0108
0.0132	0.0104	0.0128	0.008	0.0124	0.0156	0.014	0.0128	0.3456	0.1344	0.004	0.02	0.0004	0.5856	0.0016	0.0136	0.0128	0.014	0.012	0.0224	0.0008	0.0436	0.1112	0.0148	0.0024	0.252	0.0272	0.0772	0.244	0.042	0.0064	0.0192	0.0128	0.0192	0.0216	0.0388	0.0196	0.016		0.0128	0.0016	0.0736	0.01	0.0872	0.0024	0.164	0.0272	0.022
0.0144	0.0176	0.0096	0.0276	0.6304	0.0132	0.0188	0.0044	0.0024	2.7356	0.0112	0.5808	0.1024	0.0276	0.0176	0.014	0.0868	0.0056	0.0344	0.0064	0.06	0.0096	0.0128	0.004	0.012	0.0272	0.0472	0.1044	0.0128	0.0112	0.0124	0.0004	0.0008	0.0492	0.0152	0.0008	0.0008	0.244		0.02	0.0384	0.0516	0.0256	0.0556	0.0048	1.1924	0.0324	0.002
0.036	0.004	0.0196	0.0088	1.2792	0.0004	0.0144	0.0116	0.0004	0.0356	0.0184	0.0188	0.0744	0.0024	1.0764	0.0004	0.0916	0.0096	0.0028	0.03	0.0068	0.0168	0.018	0.0144	0.1224	0.004	0.0128	0.0116	0.1224	0.0112	0.3016	2.5492	0.034	0.0364	0.018	0.0088	0.0016	0.042		0.098	0.0112	0.0124	0.006	0.0504	0.0012	0.0264	0.0124	0.0492
0.0812	0.0804	0.056	0.004	0.0736	0.0088	0.0116	0.0268	0.0212	0.004	0.1376	0.004	0.0132	0.0196	0.0272	0.024	0.0484	0.0236	0.0096	0.0112	0.0048	0.0232	0.01	0.0048	0.4492	0.0248	0.04	0.0364	0.4492	0.1856	0.0316	0.0068	0.0032	0.052	0.0044	0.0272	0.0156	0.0008		0.0348	0.048	0.0936	0.0004	0.0044	0.0168	0.0104	0.0012	0.016
0.0012	0.028	0.0188	0.0116	0.0096	0.0144	0.0036	0.012	0.1	1.2108	0.0128	0.0212	0.1244	0.0008	0.0384	0.0072	0.1244	0.0008	0.0176	0.268	0.3028	0.0056	0.1248	0.1236	0.1996	0.004	0.2724	1.4068	0.1996	0.0336	0.0076	0.0172	0.0016	0.012	0.0112	0.0224	0.0272	0.0008		0.0128	0.514	0.0052	0.6128	0.038	0.0384	0.0232	0.008	0.018
0.0156	0.0168	0.0128	0.018	0.0144	0.0116	0.0156	0.0036	0.0052	0.0152	0.0484	0.0016	0.0188	0.038	0.002	0.144	0.0108	0.0444	0.0136	0.0132	0.11	0.0008	0.0128	0.0008	0.0136	0.0004	0.0952	0.028	0.0136	0.0764	0.0136	0.0048	0.0148	0.0224	0.0028	0.0596	0.0412	0.0064		0.0724	0.0412	0.0084	0.0096	0.164	0.2896	0.0164	0.0108	0.0436
0.0208	0.0172	0.0908	0.0048	0.0492	0.0252	0.0116	0.02	0.1776	0.0048	0.0336	0.0836	0.0316	0.0444	0.0472	0.1496	0.0056	0.0104	0.0012	0.0976	0.2344	0.0088	0.1468	0.002	0.1172	0.0812	0.3028	0.0104	0.008	0.0124	0.0908	0.0104	0.0008	0.0008	0.0124	0.0072	0.0252	0.0004		0.0128	0.2468	0.0324	0.0124	0.0004	0.0372	0.518	0.048	0.01
0.0064	0.0088	0.01	0.0608	0.0124	0.0112	0.024	0.0164	0.1636	0.0196	0.1796	1.3512	0.0028	0.1072	0.0304	0.0228	0.012	0.0092	0.0024	0.0136	0.076	0.0104	0.02	0.0096	0.0112	0.0024	0.0032	0.0088	0.0112	0.0036	0.012	0.2036	0.0108	0.002	0.0136	0.018	0.034	0.002		0.0212	0.0108	0.1456	0.0004	0.41	0.2396	0.0244	0.0192	0.0004
0.0012	0.0032	0.0016	0.0188	0.038	0.01	0.018	0.2956	0.5652	0.3256	0.0168	0.0148	0.0176	0.3528	0.356	0.012	0.0084	0.0164	0.0172	0.0484	0.076	0.032	0.012	0.05	0.0032	0.0064	0.0028	0.01	0.0032	0.0672	0.0116	0.2328	0.0008	0.0124	0.03	0.01	0.004	0.022		0.1116	0.0884	0.0104	0.018	0.0012	0.0008	1.882	0.028	0.01
0.0032	0.0108	0.0696	0.0032	0.0664	0.0004	0.0468	0.0132	0.0716	0.016	0.0232	0.0132	0.044	1.7	0.046	0.0136	0.0076	0.0148	0.0276	0.004	0.0188	0.048	0.0292	0.006	0.0036	0.0004	0.0008	0.0332	0.0036	0.0072	0.0028	0.0172	0.0132	0.0152	0.0116	0.032	0.0456	0.0156		0.0104	0.1592	0.0224	0.0076	0.0256	0.0144	0.0084	0.0036	0.0396
0.0136	0.0284	0.0132	0.0164	0.02	0.0296	0.012	0.0508	0.0384	2.6472	0.0436	0.0532	0.2448	0.1292	0.002	0.0148	0.4528	0.0124	0.0452	0.0228	0.0692	0.0084	0.0136	0.0264	0.0232	0.062	0.0008	0.0412	0.0232	0.0036	0.2692	0.006	0.2276	0.0724	0.0128	0.0144	0.0132	0.0152		0.0212	0.0136	1.5464	0.0348	0.5628	0.2024	0.1828	0.016	0.1368
0.0292	0.1204	0.012	0.0156	0.0784	0.0096	0.0192	0.0004	1.3532	0.1448	0.0288	0.002	0.1812	0.0052	0.0908	0.0568	0.0164	0.002	0.0232	0.7752	0.0888	0.4196	0.0172	0.0836	0.0156	0.0056	0.0028	0.1016	0.0156	0.0172	0.0056	0.2736	0.018	0.0192	0.0688	0.0068	0.0024	0.656		0.0128	0.0004	0.0064	0.1	0.0256	0.0124	0.0104	0.0092	0.0252
0.0012	0.0148	0.0188	0.0676	0.0048	0.0268	0.024	0.0204	0.0088	0.0008	0.0044	0.0424	0.0132	0.0052	0.0056	0.0148	0.0164	0.0228	0.0324	0.0112	0.056	0.0004	0.0144	0.0636	0.0088	0.0392	0.0572	0.0052	0.0088	0.002	0.0004	0.0132	0.0008	0.0636	0.0016	0.014	0.014	0.0052		0.042	0.0772	0.0016	0.0736	0.0076	0.0116	0.0004	0.0392	0.0168
0.0096	0.0188	0.0088	0.0084	0.0268	0.024	0.0128	0.0192	0.0028	0.1564	0.0168	0.0036	0.2104	0.0044	0.0336	0.0096	0.01	0.008	0.01	0.0304	0.01	0.116	0.0004	0.0128	0.0416	0.0024	0.006	0.2804	0.0416	0.0104	0.008	1.5424	0.0116	0.0088	0.018	0.0096	0.008	0.054		0.0004	0.0648	0.0276	1.786	0.0008	0.0144	0.0176	0.0192	0.01
0.0088	0.0024	2.0228	0.0112	0.0076	0.0176	0.0168	0.0328	0.0004	0.0568	0.2728	0.0044	0.0004	0.0052	0.0252	0.0116	0.0044	0.066	0.008	0.01	0.008	0.1388	0.0164	0.0296	0.0272	0.1088	0.004	0.1748	0.024	0.014	0.0248	0.0132	0.0124	0.0068	0.0096	0.0116	0.0108	0.0192		0.0196	0.0004	0.0196	0.0036	0.0032	0.0056	0.01	0.0244	0.2408
0.0372	0.0128	0.0112	0.014	0.0044	0.0248	0.01	0.0776	3.7572	0.0412	0.022	0.02	0.158	0.0296	0.0096	0.018	0.0112	0.0096	0.0056	0.0112	0.0144	0.0004	0.0748	0.0868	0.0004	0.0552	0.0176	0.002	0.0004	0.0612	0.14	0.0012	0.002	0.026	0.0084	0.0188	0.0028	0.0096		0.0316	0.004	0.044	0.0196	0.0032	0.0316	0.0376	0.0156	0.002
0.012	0.2948	0.2616	0.0108	0.014	0.01	0.0464	0.0148	0.0216	0.4504	0.3968	0.0408	0.026	0.0088	0.3028	0.0028	0.0416	0.0144	0.0016	0.0252	0.0112	0.0044	0.0328	0.0188	0.2016	0.028	0.0008	0.0452	0.002	0.0144	0.0192	0.0152	0.0164	0.0124	0.014	0.0228	0.0204	0.0008		0.0124	0.0004	0.0076	0.0144	0.0104	0.2896	0.022	0.0076	0.0348
0.0908	0.026	0.0124	0.224	0.0392	1.172	0.0012	0.0056	0.01	0.0508	0.004	0.0004	0.0016	0.0124	0.01	0.03	0.02	0.0192	0.0104	0.0768	0.0136	0.0076	0.0024	0.0848	0.0108	0.0428	0.104	0.026	0.0108	0.006	0.0008	0.0216	0.004	0.0016	0.0112	0.01	0.006	0.0364		0.0624	0.2064	0.0244	0.0348	0.0408	0.0312	0.0096	0.0104	0.0048
0.0592	0.012	0.024	0.004	0.0316	0.0108	0.0552	0.0148	6.1752	0.0836	0.012	0.048	0.0324	0.0132	0.0212	0.0128	0.012	0.0124	0.0724	0.052	0.148	0.0068	0.0768	0.018	0.0136	0.0148	0.0184	0.0088	0.0136	1.698	0.012	0.0004	0.0108	0.0056	0.0052	0.066	0.0204	0.0004		0.032	0.006	0.0412	0.0696	0.0196	0.2924	0.002	0.0176	0.106
0.0052	0.0104	0.0164	0.0096	0.0372	0.0132	0.0112	0.028	0.016	0.0552	0.1904	2.2524	0.0108	0.8328	0.01	0.0172	0.0448	0.0192	0.0116	0.0232	0.0236	0.0128	0.1352	0.1576	0.0444	0.0152	0.0128	0.1024	0.0444	0.0204	0.0032	4.6808	0.0152	0.0704	0.0212	0.0048	0.012	0.0384		0.0236	0.0484	0.258	0.152	0.1748	0.0016	0.0192	0.01	0.0168
0.0152	0.008	0.0056	0.0104	0.0316	0.0136	0.0144	0.0072	0.002	0.0748	0.1468	0.0044	0.0368	0.0176	0.036	0.0124	2.8504	0.0992	0.0096	0.0012	0.0056	0.0024	0.0208	0.0188	0.0524	0.0152	0.066	0.282	0.0524	0.062	0.0112	0.02	0.2424	0.0408	0.0132	0.006	0.16	0.0472		0.012	0.4096	0.0024	0.0324	0.0016	0.0024	1.2864	0.0124	0.0352
0.1336	0.0128	0.0332	0.0112	0.0508	0.0076	0.0032	0.0112	0.0028	0.3816	0.004	0.0004	0.028	0.0008	0.012	0.0128	0.0176	0.0372	1.2272	0.028	0.1148	0.0128	0.0292	0.0044	0.0364	0.0096	0.0136	0.0744	0.0364	0.0004	0.0164	0.0072	0.0268	0.006	0.0164	0.0496	0.024	0.0128		0.2836	0.0196	0.0032	0.0132	0.022	2.0136	0.0004	0.16	0.0192
0.01	0.016	0.0128	0.0124	0.012	0.01	0.0132	0.0188	1.1768	0.2964	0.0856	0.0212	0.0016	0.0024	0.0128	0.0048	0.2064	0.0896	0.048	0.0228	0.0052	0.0072	0.0084	0.0036	0.0348	0.1332	0.02	0.1628	0.396	0.0004	0.0016	0.0032	0.0532	0.058	0.0556	0.0072	0.0124	0.0416		0.016	0.0096	0.0408	0.036	2.8192	0.0048	0.0164	0.0024	0.1032
0.0172	0.0084	0.0652	0.01	0.0124	0.0164	0.0168	0.0148	0.0364	0.0144	0.0436	0.0224	0.016	0.0328	0.0116	0.014	0.0776	0.0092	0.0248	0.0032	0.012	0.0368	0.1004	0.006	0.0152	0.1492	0.012	0.0632	0.0152	0.0172	0.686	0.068	0.0032	0.0184	0.032	0.112	0.0156	0.0032		0.012	0.1336	0.0136	0.024	0.0636	0.0116	0.0088	0.024	0.0284
0.0132	0.034	0.0268	0.042	0.018	0.0024	0.0032	0.0252	0.056	0.1856	0.0264	0.008	0.0264	0.0128	0.0048	0.0052	0.0144	0.0068	0.01	0.0136	0.0136	0.0084	0.034	0.012	0.0248	0.1748	0.0076	0.0292	0.0248	0.0068	0.0624	0.002	0.0468	0.022	0.016	0.0388	0.0312	0.0316		0.0168	0.1088	0.0096	0.0192	0.0476	0.018	0.034	0.018	0.0244
0.0604	0.028	0.0032	0.0052	0.0024	0.0124	0.01	0.0196	0.0004	0.0508	0.0068	0.0052	0.0044	0.0236	0.0024	0.0064	0.0024	0.0192	0.0328	0.0216	0.0104	0.0056	0.0132	0.0732	0.0808	0.0552	0.008	0.038	0.0808	0.0284	0.0632	0.0568	0.0192	0.02	0.0132	0.01	0.0012	0.0168		0.0084	1.0484	0.0096	0.0532	0.024	0.5824	0.2776	0.1056	0.054
0.0108	0.012	0.028	0.0156	0.0756	0.0448	0.0104	0.0476	0.0044	0.0276	0.0108	0.0136	0.0764	15.4992	0.0264	0.01	0.0348	0.0136	0.0104	0.026	0.0124	0.0028	0.0124	0.0132	0.0684	0.1428	0.018	0.0012	0.0684	0.0392	0.0088	0.0236	0.0044	0.0052	0.1216	0.0624	0.0168	0.0032		0.0588	0.2884	0.0132	0.1528	0.0092	0.1848	0.0528	0.0108	0.0148
0.2104	0.0464	0.002	0.0036	0.0308	0.0228	0.0128	0.038	0.4932	0.0232	0.032	0.0832	0.0024	0.036	0.4572	0.0072	0.0184	0.0012	0.0216	0.004	0.002	0.0028	0.0856	0.014	0.0464	0.0232	1.0328	0.0352	0.0464	0.024	0.0064	0.0128	0.0128	0.0456	0.0096	0.0084	0.0108	0.0064		0.002	0.0628	0.0188	0.0156	0.0016	0.0484	0.0116	0.0052	0.0004
0.032	0.0088	0.018	0.0492	0.0084	0.0168	0.0124	0.1992	0.038	0.0768	0.0508	0.0016	0.062	0.1844	0.0296	0.022	0.0012	0.0128	0.0088	0.0136	0.0768	0.0068	0.074	0.0348	0.1024	0.014	0.006	0.0088	0.1024	0.0024	0.0032	0.0084	0.0024	0.0028	0.0008	0.0244	0.0204	0.0004		0.0228	0.0756	0.0008	0.1348	0.002	0.0004	0.052	0.026	0.0156
0.0452	0.004	0.048	0.0348	0.1824	0.0128	0.012	0.0132	0.054	0.034	0.14	0.0312	0.0376	0.0176	0.008	0.052	0.0128	0.0492	0.0276	0.022	0.0536	0.0104	0.0288	0.0164	0.0956	0.0904	0.0128	0.0008	0.042	0.004	0.0724	0.0224	0.0064	0.0128	0.0224	0.002	0.0008	0.0024		0.012	0.4436	0.5984	0.0604	0.0664	0.008	0.0176	0.0224	0.3464
0.0004	0.0156	0.016	0.1652	0.01	0.004	0.0136	0.038	0.1632	0.0072	0.0036	0.01	0.06	0.006	0.0152	0.04	0.0692	0.0052	0.0188	0.264	0.0564	0.0272	0.012	0.206	0.0004	0.0232	0.106	0.058	0.0004	0.0036	0.0012	0.0004	0.0072	0.0208	0.0224	0.01	0.0036	0.012		0.0632	0.1472	0.0436	0.0004	0.0188	0.0008	0.0196	0.0124	0.038
0.0252	0.016	0.0396	0.0112	0.1072	0.0144	0.01	0.004	0.0504	0.004	0.002	0.2624	0.0024	0.018	0.0024	0.0104	0.0064	0.0204	0.0008	0.0048	0.0036	0.0132	0.0128	0.008	0.0284	0.0012	0.1452	0.004	0.03	0.1164	0.2608	0.0096	0.0152	0.0324	0.0024	0.0088	0.0032	0.0168		0.014	0.0244	0.0308	0.264	0.0704	0.0104	0.0288	0.0076	0.0096
0.058	0.0268	0.0172	0.0028	0.0124	0.006	0.0216	0.0004	0.1648	0.09	0.0012	0.7348	4.324	0.0036	0.0004	0.0124	0.0104	0.5696	0.0428	0.0204	0.0072	0.0156	0.0156	0.0172	0.0208	0.0332	0.0264	0.1076	0.0208	0.004	0.0208	0.0052	0.01	0.006	0.0944	0.01	0.0288	0.0056		0.0096	0.0112	0.0004	0.0276	0.0244	0.0128	0.0136	0.0256	0.01
0.004	0.0016	0.0112	0.0528	0.0228	0.0572	0.0188	0.0128	0.5684	1.2084	0.0164	0.002	0.0028	0.2148	0.0128	0.0104	0.0112	0.012	0.0308	0.0504	0.0168	0.1124	0.0152	0.0032	0.0016	0.034	0.036	0.018	0.0016	0.0092	0.0168	0.0384	0.0324	0.0092	0.01	0.0056	0.0104	0.0292		0.144	0.03	0.0008	0.0084	0.0096	0.0224	2.0616	0.022	0.0152
0.0124	0.0312	0.0128	0.0112	0.01	0.0008	0.0288		0.1168	0.0756	0.0636	0.0216	0.0044	0.0132	0.01	0.022	0.0028	0.0144	0.1084	0.004	0.0084	0.0076	0.0156	0.0836	0.0024	0.0068	0.132	0.0356	0.0024	0.0008	0.0232	0.0252	0.006	0.012	0.0044	0.014	0.0272	0.016		0.0264	2.502	0.2436	0.0004	0.012	0.0096	0.0072	0.0444	0.0048
0.0024	0.0128	0.0508	0.002	0.0032	0.0208	0.0392		0.0016	0.0184	0.0132	0.1496	0.0784	0.0748	0.0128	0.0248	0.014	0.008	0.0112	0.0124	0.01	0.034	0.014	0.0424	0.0456	0.018	0.2768	0.0988	0.0456	0.496	0.0024	0.0012	0.0144	0.086	0.0404	0.2212	0.0016	0.0224		0.0104	0.1348	0.2844	0.0452	0.0008	0.0004	0.0096	0.0128	0.0548
0.0104	0.0092	0.1444	0.0016	0.0524	0.008	0.01		0.076	0.002	0.006	0.0036	0.0084	0.0272	0.0164	0.0028	0.022	0.0372	0.0644	0.0808	0.0172	0.0168	0.0272	0.0604	0.036	0.2628	0.0372	0.3308	0.0368	0.0028	0.0892	0.0028	0.0152	0.0608	0.0088	0.0052	0.0116	0.0064		0.0916	0.0212	0.03	0.0988	0.6296	0.0004	0.02	0.0068	0.0136
0.0112	0.0308	0.0056	0.0184	0.0044	0.0316	0.0136		0.0072	0.2868	0.0028	0.0964	0.016	0.1676	0.0012	0.1164	0.0096	0.0112	0.0244	0.0488	0.0804	0.076	0.01	0.008	0.0296	0.006	0.0652	0.0104	0.0296	0.8364	0.022	0.0316	0.0868	0.0028	0.01	0.0176	0.01	0.0528		0.0316	0.07	0.022	0.012	0.0396	0.0076	0.038	0.0104	0.0128
0.012	0.018	0.0236	0.0168	0.0316	0.0112	0.0168		0.0028	0.0112	0.2044	0.0284	0.0324	0.0684	0.0008	0.0384	0.0932	0.0308	0.1952	0.032	0.0004	0.0252	0.0176	0.032	0.0084	0.0056	0.0168	0.1104	0.0084	0.0148	0.0856	0.1924	0.0144	0.1964	0.01	0.0132	0.02	0.014		0.014	0.0184	0.7472	0.0304	0.4768	0.0004	1.2036	0.0024	0.0092
0.1044	0.0096	0.0012	0.0016	0.032	0.008	0.0132		0.0108	0.0096	0.0136	0.0248	0.0908	0.0768	0.0632	0.01	0.068	0.0148	0.0928	0.0084	0.0204	0.0048	0.0848	0.0344	0.1336	0.0008	0.1032	0.0044	0.008	0.2832	0.0536	0.322	0.0092	0.0056	0.1152	0.0304	0.01	0.0076		0.038	0.0268	0.0044	0.1356	0.0012	0.0004	0.0104	0.0004	0.0228
0.0144	0.016	0.0004	0.016	0.0344	0.0124	0.0272		0.016	0.3732	0.002	0.0248	0.0132	0.0136	0.0768	0.0028	0.3652	0.0184	0.0136	0.012	0.0824	0.0452	0.0288	0.016	0.006	0.02	0.0012	0.4364	0.006	0.0504	0.4092	0.008	0.1804	0.0108	0.0108	0.0064	0.0112	0.0348		0.0212	0.0024	0.0028	0.0148	0.0108	0.0056	0.056	0.0356	0.0612
0.0388	0.0084	0.012	0.0048	0.1996	0.0084	0.0356		0.0468	0.0008	0.026	0.0196	0.292	0.0536	0.01	0.128	0.0512	0.0396	0.0172	0.012	0.0068	0.0324	0.0188	0.0288	0.0008	0.4496	0.0176	0.0192	0.042	0.0068	0.0004	0.006	0.01	0.0004	0.0168	0.0104	0.0212	0.01		0.022	0.018	0.0028	0.0004	0.0192	1.3552	0.0252	0.0284	0.016
0.01	0.0064	0.0832	0.0268	0.0048	0.0756	0.014		0.006	0.0264	0.1776	0.0056	0.1408	0.0004	0.0324	0.0248	0.0008	0.0412	0.0272	0.2268	0.046	0.0144	0.0128	0.01	0.0608	0.024	0.586	0.0008	0.0608	0.4792	0.0028	1.1332	0.0172	0.2952	0.0092	0.008	0.01	0.0172		0.0476	0.0036	0.0272	0.1964	0.0576	0.0304	0.1256	0.0132	0.0128
0.0004	0.1552	0.0124	0.0052	0.0356	0.042	0.0072		0.4168	0.0276	0.2044	0.0256	0.0208	0.0012	0.0056	0.016	0.0172	0.0228	0.0068	0.008	0.0012	0.0352	0.0432	0.0068	0.008	0.0152	0.0004	0.0272	0.0082	0.0112	0.004	0.0076	0.0128	0.0136	0.0188	0.012	0.0068	0.082		0.0136	0.0068	0.0228	0.0292	1.9312	0.0012	0.1748	0.0096	0.0108
0.014	0.0204	0.0328	0.0536	0.0016	0.0028	0.0204		0.7752	0.22	0.0144	0.1948	0.0036	0.0608	0.024	0.0216	0.0056	0.0012	0.026	0.034	0.0188	0.0508	0.0168	0.0104	0.0068	0.0284	0.2092	0.3876	0.0068	0.51	0.0116	0.0096	0.0292	0.0076	0.028	0.0152	0.028	0.0076		0.0732	0.0372	0.268	0.2696	0.0052	0.434	0.0164	0.0108	0.0176
0.014	0.1752	0.002	0.058	0.0104	0.0084	0.0324		0.0796	0.0716	0.0116	1.1404	0.0284	0.8412	0.0156	0.0104	0.0368	0.0072	0.0616	0.006	0.0236	0.0388	0.0052	0.0124	0.0252	0.0024	0.1744	0.768	0.0252	0.0372	0.0116	0.0748	0.0112	0.0128	0.0216	0.0436	0.0344	0.0704		0.0344	0.0664	0.0256	0.0004	0.0184	0.0004	0.0348	0.0184	0.04
0.002	0.0104	0.1752	0.0252	0.0636	0.0112	0.014		0.4288	0.0208	0.138	2.4176	0.0068	0.02	0.046	0.02	0.1832	0.0012	0.038	0.04	0.0308	0.0536	0.0016	0.01	0.014	0.1008	0.0876	0.0508	0.0142	0.214	0.016	0.438	0.0148	0.0344	0.0104	0.0112	0.022	0.1484		0.0112	0.0236	0.0408	0.0396	0.196	0.1076	0.022	0.0104	0.0188
0.024	0.0448	0.0168	0.0068	0.0252	0.0068	0.0196		0.0152	0.0312	0.1264	0.1024	0.0028	0.2848	0.0184	0.0656	0.0136	0.0768	0.0132	0.0196	1.2292	0.008	0.0504	0.0136	0.8724	0.0796	0.1644	0.0192	0.8724	0.0444	0.0036	0.086	0.0104	0.0184	0.0048	0.0024	0.0156	0.058		0.0104	0.0136	0.0996	0.0004	0.016	0.0076	0.0024	0.0112	0.0152
0.0004	0.0128	0.008	0.014	0.2552	0.0116	0.0096		2.8124	0.008	0.0176	0.0064	0.0112	0.0792	0.0176	0.076	0.0248	0.0172	0.018	0.0248	1.2792	0.0324	0.0144	0.0164	0.0304	0.0356	0.0244	0.0488	0.036	0.5236	0.0044	0.0132	0.0092	0.0568	0.0068	0.2408	0.0356	0.0076		0.0192	0.0004	0.0552	0.2116	0.0364	0.0064	0.0244	0.1	0.0224
0.008	0.002	0.0032	0.0164	0.0128	0.0116	0.016		7.5212	0.0124	0.0044	0.0044	0.1636	0.018	0.0132	0.0128	0.0616	0.0436	0.0156	0.0092	0.0144	0.0136	0.04	0.024	0.3788	0.22	0.0088	0.008	0.016	0.0176	0.04	0.0096	0.0236	0.012	0.0256	0.0136	0.0152	0.19		0.016	1.1952	0.0184	0.0368	0.0024	0.1812	0.0036	0.188	0.0768
0.0012	0.0128	0.0364	0.0016	0.0096	0.0128	0.0032		2.354	0.0216	0.0608	0.0268	0.0088	0.0712	0.0172	0.0364	0.0164	0.0128	0.0432	0.2128	0.0128	0.0048	0.0152	0.0144	0.1176	0.02	0.0016	0.06	0.032	0.0028	0.0004	0.0228	0.0228	0.01	0.012	0.0108	0.0204	0.0224		0.0864	0.0104	0.032	0.0028	0.0056	0.1	0.0144	0.0008	0.014
0.0528	0.0132	0.0248	0.0144	0.0304	0.01	0.01		0.014	0.7688	0.0092	0.0172	0.1412	0.03	0.7084	0.0112	0.0524	0.01	0.0216	0.0004	0.4276	0.0036	0.014	0.1996	0.0308	0.038	0.0132	0.3784	0.0308	0.1048	0.0356	0.0564	0.0008	0.0024	0.0148	0.018	0.0156	0.01		0.0144	0.0012	0.0332	0.1196	0.032	0.0384	1.646	0.0056	0.0136
0.002	0.0612	0.0068	0.0308	0.0232	0.1036	0.0156		0.02	0.262	0.012	0.0232	0.0312	0.0848	0.0124	0.0044	0.022	0.0004	0.0176	0.0156	0.0104	0.1884	0.014	0.0592	0.0584	0.0044	0.0056	0.0024	0.0584	0.4524	0.146	0.0132	0.0228	0.002	0.022	0.0096	0.0096	0.01		0.0096	0.0596	0.138	0.0628	0.0156	0.0208	0.02	0.02	0.016
0.0004	0.0068	0.0752	0.0196	0.0304	0.012	0.01		0.0424	0.0176	0.0012	0.0288	0.0156	0.0052	0.15	0.0128	0.0872	0.1896	0.0624	0.0112	0.0488	0.0072	0.0388	0.016	0.0004	0.0168	0.0616	0.0196	0.0004	0.0188	0.0104	0.0108	0.0308	0.0128	0.0092	0.0104	0.0492	0.0108		0.0248	0.7836	0.0192	0.0088	0.1012	0.0284	0.0568	0.0128	0.0124
0.0152	0.0036	0.0152	0.0048	0.056	0.0132	0.0276		0.1464	0.0356	0.0432	0.0128	0.004	0.0512	0.0068	0.0112	0.0088	0.0112	0.02	0.1084	0.0004	0.0232	0.018	0.164	0.0084	0.0024	0.0244	1.844	0.012	0.1032	0.0636	0.2724	0.016	0.0004	0.062	0.0148	0.0108	0.0332		0.2332	0.0948	0.6244	0.0004	0.0332	0.5736	0.076	0.0008	0.0152
0.0388	0.0028	0.0116	0.0092	0.008	0.0244	0.0108		0.2932	0.0056	0.0576	0.0048	0.0056	0.0124	0.0076	0.0824	0.012	0.0016	0.0172	0.0056	0.0244	0.0108	0.0108	0.0016	0.0168	0.0844	0.0104	0.4864	0.0168	0.0028	0.1444	0.0168	0.0068	0.0136	0.0232	0.0024	0.012	0.0016		0.0192	0.2752	0.0216	0.0108	0.0076	0.0004	0.018	0.004	0.0132
0.0208	0.006	0.0208	0.0444	0.0004	0.1884	0.01		0.6776	0.0476	0.008	0.0136	0.0484	0.0904	0.0232	0.0332	0.004	0.0504	0.0088	0.01	0.0272	0.0108	0.0116	0.0096	0.0592	0.0028	0.0292	0.0076	0.0592	0.0184	0.014	0.0016	0.0124	0.0004	0.0088	0.0104	0.01	0.004		0.022	0.0108	0.0904	7.3808	0.0124	0.0272	0.0328	0.0376	0.028
0.0088	0.0132	0.01	0.044	0.0132	0.0144	0.0124		0.2956	0.0032	0.0232	0.0024	0.0208	1.6988	0.0192	0.028	0.0216	0.0208	0.0596	0.4164	0.036	0.028	0.012	0.0024	0.0084	0.0144	0.0196	0.0152	0.0084	0.1212	0.0216	0.0144	0.0044	0.0152	0.0012	0.1096	0.0036	0.0016		0.0328	0.002	0.2412	0.2836	0.004	0.0076	0.116	0.06	0.12
0.0184	0.0096	0.104	0.0968	0.0404	0.0128	0.0252		1.2508	0.0004	0.032	0.0904	0.0256	0.002	0.0492	0.0056	0.0132	0.0072	0.0252	0.0284	0.0352	0.0144	0.0136	0.034	0.0596	0.012	0.0696	0.0764	0.0596	0.0104	0.0312	0.0288	0.0064	0.0344	0.0652	0.0112	0.1112	0.076		0.0128	0.002	0.0356	8.3068	0.0192	0.0168	0.2264	0.0192	0.0068
0.0444	0.0224	0.8588	0.0944	0.0196	0.0276	0.0128		1.044	0.0044	0.1832	0.0172	0.0124	0.0916	0.02	0.006	0.0208	0.0236	0.0236	0.0004	0.0484	0.008	0.0204	0.0168	0.014	0.0496	0.0116	0.0356	0.0146	0.0432	0.0004	0.0356	0.0096	0.004	0.0232	0.0428	0.01	0.0452		0.018	0.0252	0.0084	0.0112	0.0028	0.0016	0.01	1.2288	0.0964
0.018	0.0148	0.006	0.0264	0.0056	0.016	0.016		0.1148	0.0144	0.0236	0.012	0.01	0.0872	0.0104	0.0248	0.0008	0.0248	0.012	0.1756	0.2168	0.0244	0.0612	0.0072	0.0304	0.06	0.0092	0.066	0.0304	0.01	0.0252	0.9424	0.006	0.0116	0.0184	0.0008	0.0224	0.3656		0.0136	0.0012	0.0084	0.0628	0.6924	0.0004	0.0012	0.3544	0.0224
0.012	0.0224	0.0144	0.0128	0.0024	0.0152	0.0104		0.2716	0.008	0.0152	0.0524	0.0224	0.0064	0.0112	0.0116	0.1088	0.0196	0.008	0.07	0.0672	0.0412	0.0288	0.04	0.0368	7.5768	1.0988	0.0576	0.144	0.0504	0.02	0.03	0.0344	0.05	0.0172	0.01	0.0068	0.006		0.0104	0.0052	0.072	0.0024	0.0012	0.0276	0.0136	0.0188	0.0016
1.122	0.0012	0.1152	0.0044	0.0072	0.0184	0.0188		11.1508	0.0064	0.0128	0.008	0.002	0.0056	0.0064	0.0288	0.0568	0.0096	0.0344	0.0112	0.0264	0.004	0.0204	0.0032	0.032	0.1224	0.0404	0.0172	0.0328	0.0188	0.1588	0.0092	0.0008	0.0056	0.0212	0.0216	0.0044	0.0412		0.0112	0.0568	0.0092	0.0028	0.014	0.0088	0.2468	0.0328	0.0048
0.0044	0.0208	0.0104	0.0248	0.1592	0.016	0.0112		0.0916	0.0012	0.0952	0.02	0.0096	0.0004	0.014	0.0168	0.0212	0.0236	0.0004	0.0128	0.0028	0.0108	0.0104	0.0312	0.0024	0.4272	0.016	0.0188	0.0024	0.0148	0.0012	0.004	0.0648	0.0124	0.022	0.0868	0.0924	0.0044		0.0128	0.0824	0.0004	0.0008	0.1176	0.0184	0.0044	0.0092	0.0016
0.0016	0.0756	0.0104	0.0136	0.072	0.0116	0.0184		0.0052	0.002	0.03	0.0164	0.1384	0.1792	0.1484	0.0268	0.012	0.0148	0.024	0.0264	0.0144	0.5332	0.0108	0.9632	0.0584	0.4104	0.0016	0.062	0.0584	0.1912	0.0168	0.0068	0.014	0.038	0.0424	0.2288	0.01	0.0068		0.0124	0.016	0.062	0.02	0.01	0.0604	0.016	0.0088	0.0116
0.0912	0.0016	0.0152	0.0168	0.0492	0.0128	0.0132		0.0692	0.0228	0.0832	0.008	0.4288	0.0988	0.7976	0.004	0.0504	0.022	0.0084	0.01	0.0008	0.044	0.0128	0.0096	0.0108	0.0352	0.0028	0.0036	0.0108	0.0008	0.0116	0.028	0.03	0.006	0.0408	0.0268	0.0168	0.0472		0.0176	0.144	0.0024	0.0076	0.018	0.0028	0.032	0.0168	0.002
0.0308	0.0108	0.0216	0.0032	0.002	0.0164	0.036		0.0044	0.0016	0.24	0.0096	0.0024	0.2452	0.0456	0.0124	0.5748	0.056	0.0124	0.0188	0.0076	0.056	0.0124	0.006	0.0096	0.0172	0.0292	0.0136	0.0096	0.024	0.002	0.0396	0.046	0.0132	0.0116	0.0164	0.0232	0.5176		0.0148	0.032	0.0708	0.0284	0.0248	0.0008	0.042	0.028	0.058
0.0024	0.0156	0.0164	0.0112	0.0212	0.0184	0.014		0.0152	0.026	0.014	0.0104	0.2496	0.1456	0.0084	0.2176	0.0052	0.0056	0.0444	0.006	0.0224	0.2156	0.2428	0.0176	7.3964	0.0096	0.0048	0.0808	7.3964	0.0056	0.0344	0.048	0.0108	0.058	0.0064	0.0204	0.0152	0.0072		0.0104	0.0332	0.0072	0.0368	0.4652	0.0548	0.212	0.0124	0.0176
1.848	0.0012	0.0292	0.012	0.0136	0.0732	0.0172		0.0044	0.0088	0.002	0.0196	0.7556	0.0012	0.0132	0.012	0.0048	0.002	0.0056	0.0616	0.0184	0.0048	0.01	0.0104	0.0016	0.0152	0.0224	0.0444	0.036	0.0132	1.9404	0.052	0.0132	0.0024	0.0304	0.024	0.008	0.0452		0.0248	0.254	0.0068	0.0064	0.0812	0.0316	0.0368	0.0088	0.022
0.0112	0.2428	0.2088	0.058	0.0288	0.0248	0.0128		3.6116	0.0424	0.1364	0.0728	0.0232	0.0148	0.016	0.0172	0.0216	0.7312	0.022	0.0104	0.0068	0.0036	0.0148	0.0156	0.0116	0.0076	0.0168	0.0144	0.0116	0.004	0.0072	0.166	0.0296	0.0088	0.008	0.0176	0.0112	0.038		0.0148	0.0076	0.6456	0.0604	0.0492	0.0156	0.0004	0.0164	0.018
0.0216	0.01	0.0248	0.0284	0.0144	0.02	0.0148		0.182	0.0012	0.1188	0.1868	0.1724	0.002	0.5584	0.0104	0.0152	0.01	0.0012	0.018	0.3224	0.0168	0.036	0.0688	0.0008	0.012	0.0068	0.0048	0.0008	0.0092	0.0176	0.0004	0.0696	0.0628	0.006	0.0124	0.0032	0.0284		0.0124	0.0716	0.2576	0.066	0.0152	0.0148	0.0176	0.0008	5.4052
0.0168	0.0176	0.0076	0.0128	0.002	0.038	0.0128		0.0264	0.0576	0.0176	0.0488	0.0128	0.0788	0.0148	0.0184	0.0016	0.0448	0.0148	0.0084	0.0124	0.0004	0.004	0.0088	0.0072	0.0012	0.2316	0.0024	0.0072	0.0252	0.4504	7.9344	0.0204	0.004	0.0136	0.0044	0.0168	0.0068		0.0112	0.0232	0.0552	0.238	0.0592	0.0456	0.0164	0.026	0.018
0.0112	0.0376	0.0172	0.0104	0.0516	0.012	0.0136		0.1644	0.0032	0.0188	0.0148	0.1864	0.0236	0.0124	0.0656	0.0048	0.0072	0.0024	0.004	0.02	0.006	0.0132	0.012	0.4268	0.0048	0.0752	0.0084	0.4268	0.0184	0.0096	0.0228	0.0844	0.0228	0.0024	0.0132	0.008	0.0012		0.0124	0.0356	0.0064	0.1112	4.946	0.0516	0.0128	0.0116	0.0376
0.0104	0.1108	0.0144	0.0772	0.008	0.0128	0.0136		0.0696	0.0004	0.1908	0.3092	0.0584	1.8688	0.0136	0.0216	0.0916	0.0072	0.0044	0.01	0.0392	0.014	0.0016	0.0128	0.0276	0.0008	0.0104	0.5268	0.0276	0.0124	0.0528	0.2964	0.0088	0.0228	0.0868	0.06	0.014	0.0032		0.0548	0.2268	0.032	0.0656	0.0296	0.3	0.0416	0.0184	0.0084
0.0548	0.0044	0.1428	0.0396	0.0016	0.0004	0.0136		0.0492	0.0004	0.0188	0.0136	0.0272	0.016	0.1796	0.0128	0.0104	0.1148	0.0216	0.0032	0.1168	0.0008	0.0452	0.0016	0.0204	0.0216	0.076	0.002	0.196	0.0436	0.0008	0.0424	0.0232	0.0076	0.1912	0.042	0.008	0.6912		0.036	1.5844	0.008	0.1964	0.016	0.0012	0.166	0.06	0.062
0.034	0.0284	0.0208	0.0112	0.052	0.0356	0.0128		0.0164	0.3136	0.0044	0.0352	0.0008	0.0088	0.0132	0.0044	0.0056	0.0024	0.012	0.0192	0.002	0.0704	1.4468	0.0004	0.0016	12.6684	0.0156	0.0244	0.0016	0.0728	0.0256	0.006	0.0128	1.2964	0.014	0.002	0.01	0.0092		0.0112	0.0468	0.0028	0.0012	0.378	0.0348	0.006	0.0236	0.0132
0.0044	0.01	0.0032	0.0176	0.0184	0.022	0.008		3.3208	0.0936	0.4336	0.2896	0.0196	0.0144	0.0724	0.0076	0.0176	0.0116	0.0144	0.0152	0.3052	0.0292	0.0908	0.0524	0.196	0.0344	0.0048	0.0492	0.1966	0.0464	0.01	0.0008	0.0052	0.0124	0.1596	0.0072	0.02	0.0092		0.0052	0.2216	0.0192	0.0896	0.0076	0.0004	0.0124	0.3456	0.0352
0.032	0.0004	0.0104	0.036	0.008	0.006	0.012		0.0136	0.0192	0.0288	0.036	0.0188	0.0544	0.2136	0.0296	0.0168	0.08	0.0336	0.0148	0.1516	0.0404	0.0412	0.0052	0.044	0.0776	0.0008	0.01	0.0444	0.0156	2.2888	0.0196	0.0272	0.014	0.0192	0.3056	0.0764	0.012		0.0128	0.0056	0.0048	0.024	0.0748	0.0208	0.0424	0.01	0.0056
0.0172	0.0896	0.0052	0.0096	0.0564	0.0016	0.0332		0.0172	0.284	0.0056	0.012	0.268	0.0084	0.008	0.052	0.046	0.01	0.0008	0.2172	0.0068	0.0196	0.0172	0.144	0.0472	0.0284	0.02	0.0696	0.0472	0.0076	0.1452	0.1072	0.0428	0.0104	0.0132	0.0284	0.0356	0.0372		0.02	0.0196	0.058	0.0276	0.0152	0.002	0.0124	0.0052	0.0224
0.0232	0.008	0.0156	0.1272	0.034	0.0132	0.0132		0.0756	0.1824	0.018	0.3252	0.0104	0.0184	0.0216	0.0156	0.0004	0.0184	0.01	0.01	0.262	0.0012	0.008	0.0572	0.0004	0.0556	0.1172	0.112	0.0004	0.0108	0.0156	0.0132	0.1428	0.012	0.0032	0.0008	0.0056	0.0524		0.0564	0.1524	0.0304	0.1124	1.1088	0.0168	0.0096	0.0084	0.0136
0.0504	0.0072	0.018	0.0112	0.006	0.0004	0.0124		1.0824	0.1168	0.0456	0.0092	0.006	0.0028	0.042	0.0428	0.0236	0.0348	0.0212	0.0268	0.0108	0.0004	0.07	0.0068	0.0236	0.02	0.0136	0.0016	0.0236	2.1148	0.1552	0.1244	0.0072	0.0284	0.006	0.0076	0.0288	0.0176		0.0256	0.1144	0.0172	0.0132	0.0924	0.024	0.0124	0.0204	0.1712
0.0272	0.0072	0.0308	0.01	0.0464	0.0196	0.0016		0.0312	0.0096	0.1	0.018	0.3844	0.0508	0.028	0.0056	0.0512	0.0496	0.0036	0.0056	0.038	0.018	0.0136	0.0012	0.0148	0.0096	0.066	0.0184	0.024	0.1692	0.0076	0.014	0.0168	0.0156	0.1172	0.0084	0.0136	0.0016		0.062	0.0348	0.0156	0.01	0.004	0.0068	0.0092	0.014	0.0068
0.0072	0.0328	0.002	0.0112	0.012	0.014	0.0004		3.4812	0.248	0.0112	0.0216	0.0028	0.0184	0.0196	0.0732	0.1172	0.0264	0.0004	0.0252	0.0072	0.1636	0.0156	0.0008	0.0212	0.01	0.0132	0.068	0.0212	0.0156	0.0316	0.0108	0.0192	0.0096	0.0488	0.0216	0.008	0.0148		0.0136	0.6096	0.0004	0.09	0.5284	23.4328	0.0108	0.0224	0.0392
0.0148	0.0088	0.0112	0.026	0.0152	0.0096	0.0156		0.0284	0.4388	0.1396	0.062	0.196	1.384	0.0088	0.0104	0.0044	0.064	0.0124	0.0628	0.0144	0.0096	1.8712	0.0488	3.1448	0.0016	0.0152	0.0772	3.1448	0.2016	0.1512	0.0096	0.0544	0.0004	0.0152	0.008	0.0128	0.0308		0.0148	0.0028	0.0348	0.0084	0.0112	0.0952	0.0212	0.0052	0.0108
0.1692	0.0008	0.0228	0.0124	0.0284	0.0124	0.04		0.0952	0.0524	0.0244	0.0092	0.0324	0.0872	0.014	0.0128	0.0688	0.002	0.0388	0.432	0.0172	0.01	0.012	0.0112	0.134	0.0016	0.0056	0.0432	0.1348	0.01	0.002	0.0008	0.0008	0.0136	0.0144	0.0108	0.0196	0.0008		0.0488	0.0844	0.0044	0.0012	0.0004	0.0268	0.0556	0.0244	0.0072
0.0056	0.0192	0.0356	0.0104	0.002	0.0152	0.0388		0.032	0.0508	0.0248	0.0128	0.0108	1.0636	0.0148	0.0164	0.0188	0.012	0.0136	0.0132	0.028	0.004	0.0172	0.0128	0.7872	0.0872	0.032	0.02	0.7872	0.0236	0.0144	0.0044	0.0172	0.0268	0.0136	0.0288	0.0092	0.0004		0.0124	2.54	0.2504	0.0592	0.3336	0.02	0.0328	0.1584	0.0012
0.0084	0.0356	0.0044	0.0404	0.1264	0.0556	0.0136		0.0036	0.0788	0.0116	0.0076	0.0192	1.6156	0.012	0.0136	0.0076	0.0292	0.0376	0.0436	0.0108	0.464	0.0136	0.066	0.0032	0.046	0.03	0.0324	0.0032	0.0032	0.01	0.0228	0.0292	0.0056	0.0008	0.012	0.0124	0.016		0.0184	0.01	0.0464	0.002	0.0156	0.0116	0.0568	0.016	0.0128
0.0128	0.0132	0.0048	0.0008	0.0312	0.0188	0.0828		0.0396	0.0004	0.0036	0.0004	0.0492	0.0904	0.0216	0.0444	0.1796	0.316	0.0064	0.0448	0.134	0.0092	0.0232	0.0768	0.0608	0.0212	0.0204	0.0092	0.0608	0.254	0.0028	0.022	0.002	0.0128	0.0068	0.0872	0.0172	0.0252		0.01	0.0464	0.1208	0.0048	0.156	0.0016	0.0676	0.0324	0.0128
0.0228	0.0132	0.0116	0.0116	0.0144	0.0124	0.0116		0.0288	0.016	0.0264	0.012	0.2148	0.0056	0.0908	0.0032	0.1248	0.008	0.1784	0.0604	0.0444	0.0152	0.0196	0.0024	0.0308	0.0304	0.01	0.102	0.0308	0.024	0.01	0.0168	0.0068	0.0136	0.0156	0.0108	0.0112	0.0268		0.01	0.1604	0.0048	0.0132	0.05	0.0032	0.282	0.0156	0.0132
0.014	0.0004	0.0076	0.012	0.0168	0.0184	0.0124		0.0076	0.0844	0.0008	0.01	0.0024	0.1344	0.0044	0.1636	0.2156	0.0084	0.0004	0.0004	0.0132	0.0132	0.0976	0.016	0.0512	0.03	0.0684	0.05	0.012	0.0024	0.0184	0.0056	0.0268	0.0376	0.3452	0.0724	0.0124	0.0012		0.0548	0.026	0.0236	0.0008	0.078	0.0064	0.0056	0.9176	0.1104
0.0008	0.0096	0.0128	0.0032	0.1564	0.0216	0.0148		0.004	0.0992	0.058	0.0012	0.0288	0.4208	0.02	0.0132	0.038	0.0072	0.0248	1.2176	0.0132	0.0464	0.0032	0.0704	0.0024	0.008	0.0196	1.188	0.0024	0.1368	0.0332	0.0088	0.0052	0.0164	1.7528	0.022	0.0128	0.148		0.0132	0.1184	0.0008	0.1532	0.02	0.0192	0.0252	0.1176	0.0132
0.0212	0.01	0.0988	0.2172	0.286	0.0176	0.0328		0.0752	0.0028	0.036	0.126	0.0124	0.014	0.0212	0.01	0.0028	0.0012	0.018	0.01	0.0104	0.0032	0.0008	0.9816	0.0424	0.0252	0.1292	0.0252	0.0424	0.0176	0.02	0.0116	0.0284	0.0088	0.01	0.0212	0.01	0.02		0.0132	0.0088	0.008	0.01	0.0144	0.0032	0.0076	0.0416	0.036
0.0148	0.0016	0.0188	0.126	0.0224	0.0208	0.0208		0.062	0.014	0.0128	0.4488	0.012	0.0224	0.0236	0.0104	0.0904	0.09	0.002	0.0036	0.0284	0.01	0.0692	0.1264	0.0068	0.0648	0.1224	0.0208	0.0068	0.0764	0.0008	0.006	0.048	0.0212	0.0204	0.0076	0.0248	0.0004		0.0164	0.0236	0.002	0.0132	0.0232	0.0148	0.0448	0.072	0.02
0.03	0.0532	0.0036	0.0268	0.0008	0.008	0.0128		0.0412	0.0272	0.0124	0.0004	0.026	0.032	0.1824	0.0296	0.006	0.0608	0.0284	0.0008	0.0708	0.0124	0.0108	0.3972	0.0296	0.0788	0.0312	0.0076	0.0296	0.0732	0.01	0.0188	0.0068	0.0216	0.002	0.014	0.0084	0.22		0.0136	0.4468	0.0064	0.0056	0.062	0.01	0.2132	0.256	0.0144
0.058	0.0028	0.0108	0.0024	0.012	0.0148	0.0204		0.002	0.0264	0.0452	0.002	0.0036	0.016	0.0744	0.0784	0.1284	0.0212	0.014	0.0232	0.1536	0.0252	0.016	0.0128	0.2488	0.0836	0.0064	1.806	0.2488	0.016	0.0004	0.0388	0.0128	0.0124	0.0156	0.0148	0.02	0.0288		0.0112	0.0264	0.022	0.0256	0.0116	0.098	0.0368	0.0068	0.0064
0.0032	0.148	0.0324	0.0128	0.0044	0.01	0.0112		0.0004	0.0232	0.0048	0.0028	0.0052	0.0492	0.0156	0.018	0.0104	0.0052	0.032	0.0232	0.0064	0.0376	0.0144	0.0064	0.02	0.036	0.008	0.0448	0.0228	0.134	0.0248	0.4684	0.1112	0.05	0.0248	0.2776	0.0124	0.0072		0.0136	0.0988	0.034	0.06	0.0032	0.0128	0.088	0.0128	0.012
0.0304	0.0164	0.0044	0.0052	0.0704	0.01	0.0128		0.0004	0.0132	0.012	0.012	0.0096	0.0016	0.0232	0.0188	0.0148	0.0004	0.022	0.0096	0.0396	0.0072	0.1036	0.1348	0.0292	0.0076	0.0072	0.3932	0.0292	0.0844	0.014	0.4916	0.0076	0.012	0.0072	0.0436	0.0108	0.0152		0.0104	0.0116	0.106	0.002	0.0396	0.014	0.0584	0.0116	0.0168
0.0056	0.0208	0.0084	0.0648	0.0052	0.0068	0.012		0.732	0.0636	0.0044	0.0108	0.0152	0.0964	0.0292	0.02	0.0256	0.0176	0.0008	0.0872	0.0028	0.0104	0.0052	0.0168	0.0136	0.0156	0.026	0.1032	0.0136	0.0136	0.0456	0.0676	0.0104	0.0124	0.0128	0.0412	0.0016	0.0756		0.014	0.2076	0.0036	0.002	0.0104	0.0904	0.0228	0.0552	0.0252
0.0136	0.0344	0.2264	0.01	0.01	0.0092	0.0052		0.0512	0.0748	0.0036	0.006	0.0472	0.2796	0.042	0.0212	0.0072	0.0012	1.1576	0.022	0.002	0.0308	0.0148	0.012	0.1044	0.0044	0.0228	0.0668	0.1044	0.0068	0.0144	0.0204	0.0132	0.0048	0.1192	0.0084	0.0168	0.0084		0.0252	0.0116	0.1044	0.004	0.0072	0.0716	0.082	0.0044	0.014
0.012	0.022	0.024	0.0128	0.9052	0.016	0.0348		0.4936	0.5388	0.0088	0.0264	0.104	0.0004	0.0036	0.006	0.0324	0.0016	0.0044	0.0628	0.0068	0.0116	0.0516	0.0172	0.0524	0.0356	0.004	0.0008	0.0524	1.5212	0.0252	0.0308	0.0112	0.0132	0.0048	0.0048	0.002	0.0032		0.0236	0.534	0.0164	0.1624	0.0216	0.0056	0.262	0.0128	0.1992
0.0176	0.0116	0.012	0.018	0.0156	0.0012	0.0192		0.0376	0.1024	0.0144	0.018	0.3724	0.0004	0.0116	0.0128	0.0104	0.0152	0.0132	0.0312	0.066	0.0736	0.0172	0.058	0.0524	0.05	0.002	0.0176	0.0524	0.0124	0.0736	0.052	0.0012	0.0084	0.0048	0.02	0.0128	0.01		0.0148	0.0008	0.0216	0.0052	0.0084	0.0004	0.0636	0.0024	0.0124
0.0068	0.0012	0.0008	0.0124	0.0372	0.012	0.0104		1.6996	0.3232	0.2196	0.0148	0.01	1.0728	0.0116	0.0024	0.0072	0.0116	0.0856	0.0568	0.018	0.0632	0.0204	0.0112	0.0936	0.0168	0.0236	0.0136	0.0936	2.7632	0.0356	0.066	0.0552	0.0204	0.006	0.0264	0.0004	0.182		0.0068	0.8648	0.0024	0.0376	0.018	0.0212	0.0656	0.022	0.0132
0.0156	0.062	0.0028	0.0096	0.0096	0.01	0.0492		0.2244	0.0012	0.0248	0.0088	0.0228	1.1948	0.0216	0.012	0.2344	0.0076	0.0032	0.0716	0.2252	0.0032	0.0012	0.016	0.0016	1.9868	0.0084	0.0064	0.0016	0.0068	0.0284	0.026	0.0332	0.0132	0.0084	0.0512	0.0108	0.0044		0.0096	0.0468	0.0352	0.024	0.0332	0.0032	0.0032	0.01	0.0012
0.0036	0.0292	0.0264	0.0116	0.0196	0.0032	0.0172		0.44	0.0384	0.016	0.002	0.0032	0.258	0.0036	0.0108	0.0052	0.0056	0.0116	0.0224	0.0084	0.0116	0.0312	0.0128	0.008	0.6956	0.0032	0.008	0.0084	0.014	0.0136	0.028	0.1064	0.012	0.0004	0.0084	0.0956	0.0428		0.0128	0.012	0.014	0.0324	0.0736	0.05	0.0128	0.0252	0.0248
0.1476	0.0348	0.0032	0.024	0.0032	0.0144	0.0144		0.1368	0.0308	0.048	0.0012	0.0052	0.4772	0.0128	0.0804	0.0012	0.0284	0.0008	0.0456	0.0512	0.1668	0.0676	0.0072	0.0016	0.1324	0.0504	0.0124	0.0016	0.092	0.024	0.0216	0.02	0.0748	0.026	0.0148	0.0108	0.108		0.0284	0.0164	0.014	0.0012	0.1088	0.0068	0.1096	0.0196	0.0128
0.0224	0.0044	0.0232	0.0176	0.0204	0.0408	0.0132		0.0036	0.0448	0.0084	0.0024	0.002	0.04	0.038	0.0084	0.4512	0.0052	0.016	0.0012	0.1024	0.004	0.0396	0.0236	0.014	0.0232	0.0128	0.0068	0.014	0.064	0.0332	0.0036	0.0056	0.0096	0.0124	0.1672	0.0568	0.022		0.0308	0.0028	0.004	0.0132	0.8296	0.0108	0.3232	0.026	0.0112
0.0808	0.0224	0.0112	0.0124	0.7988	0.012	0.016		0.0372	0.074	0.0836	0.0104	0.0976	0.43	0.0168	0.002	0.0136	0.002	0.0272	0.0308	0.0288	0.0052	0.0188	0.0932	0.0332	0.0008	0.0056	0.0004	0.0332	0.0412	0.008	0.0024	0.0964	0.0112	0.0196	0.0612	0.008	0.0128		0.0076	0.0024	0.1224	0.3312	0.0192	0.0136	0.0084	0.586	0.0236
0.0076	0.0352	0.0076	0.004	0.0088	0.0112	0.016		0.0148	0.0028	0.0264	0.0212	0.3832	0.0428	0.05	0.5964	0.0192	0.0156	0.1928	0.006	0.0016	0.0308	0.0028	0.0032	0.0452	0.0812	0.01	0.0004	0.0452	0.0248	0.0008	0.018	0.0148	0.0136	0.0052	0.0296	0.02	0.0336		0.0136	0.008	0.0116	0.0064	0.0148	0.0032	0.012	0.012	0.0208
0.0268	0.0004	0.0192	0.0376	0.104	0.0352	0.0144		0.0216	0.008	0.0124	0.0108	0.142	0.1472	0.0784	0.0128	0.0284	0.0328	0.0428	0.0128	0.062	0.002	0.012	0.0076	0.0212	0.0092	0.004	0.014	0.0212	0.0064	0.0112	0.014	0.0156	0.0208	0.02	0.1052	0.0084	0.038		0.0508	0.0224	0.1324	0.1644	0.0036	0.004	0.1096	0.0024	0.0284
0.008	0.0124	0.0768	0.0008	0.0056	0.0216	0.0044		0.1828	0.0108	0.002	0.0444	0.0064	0.0024	0.016	0.0068	0.0336	0.0692	0.028	0.1284	0.2336	0.0136	0.0008	0.01	0.0136	0.0012	0.0156	0.0164	0.0136	0.0004	0.006	3.0076	0.0288	0.0016	0.0056	0.0116	0.0244	0.0012		0.0216	0.5408	0.0508	0.0052	0.0012	0.0064	0.1252	0.014	0.0012
0.0164	0.0092	0.4292	0.0152	0.0044	0.0004	0.012		0.0128	0.014	0.32	0.0756	0.0152	0.0916	0.0152	0.01	0.0148	0.1068	0.0124	0.0124	0.002	0.0072	0.0068	0.0188	0.8888	0.0108	0.0132	0.0396	0.556	0.0968	0.0264	0.0128	0.02	0.1068	0.0076	0.0128	0.0604	0.0004		0.0404	0.0044	0.0208	0.0184	0.0212	0.0016	0.02	0.1976	0.0332
0.0088	0.0088	0.0072	0.012	0.034	0.0516	0.0128		0.1788	3.4636	0.0668	0.092	0.0248	0.0008	0.0112	1.0288	0.6048	0.0016	0.0116	0.0248	0.0056	0.02	0.2252	0.1716	0.0028	0.0008	0.0052	0.0164	0.0028	0.038	0.0016	0.016	0.1552	0.0052	0.026	0.0076	0.014	0.0004		0.01	0.0128	0.008	0.0628	1.2168	0.014	0.01	0.108	0.0128
0.1096	0.0336	0.0056	0.0076	0.024	0.03	0.0128		0.4488	0.0672	0.0048	0.0108	0.0056	0.4336	0.0824	0.01	0.0148	0.0104	0.026	0.3776	0.0168	0.0112	0.012	0.0068	0.0152	0.0184	0.0008	0.0356	0.0152	0.0344	0.0164	0.0456	0.1844	0.0216	0.0088	0.0116	0.0152	0.106		0.0164	0.5616	0.0024	0.0752	0.218	0.0404	0.2872	0.0088	0.0184
0.0016	0.0348	0.032	0.0156	0.066	0.0136	0.0644		0.0048	0.088	0.0036	0.0716	0.0032	0.0228	0.006	0.0072	0.118	0.0268	0.0064	0.0296	0.0984	0.0064	0.012	0.0128	0.0096	0.0004	0.0096	0.01	0.0096	0.0028	0.068	0.0304	0.0032	0.798	0.0628	0.0156	0.0048	0.016		0.014	0.1608	0.0204	0.6652	0.0032	0.0036	0.16	0.0168	0.0936
0.014	0.0072	0.0344	0.0016	0.0168	0.0204	0.0308		0.0012	0.0336	0.0156	0.004	0.0048	0.0484	0.0076	0.0264	0.0012	0.0132	0.0064	0.0176	0.0228	0.0188	0.0072	0.0104	0.0148	0.0252	0.008	0.0092	0.0148	0.0188	0.0096	0.02	0.0696	0.6696	0.0812	0.012	0.0064	0.034		0.01	0.0012	0.0076	0.0132	0.072	0.0204	6.0796	0.0128	0.0132
0.0124	0.0724	0.0364	0.0152	0.0492	0.0328	0.0132		0.0372	0.03	0.0152	0.0008	0.0144	0.0048	0.0016	0.1276	0.0704	0.0248	0.0012	0.0016	0.0156	0.0656	0.012	0.0168	0.0004	0.3144	0.0148	0.0412	0.0004	0.0016	0.0056	0.0192	0.0004	0.0132	0.0104	0.0184	0.0136	0.02		0.0292	0.058	0.0036	0.058	0.032	0.0108	0.0148	0.0184	0.0164
0.0128	0.0084	0.0084	0.0124	0.0204	0.0096	0.0176		0.0208	0.0468	0.0068	0.034	0.0136	0.0228	0.0008	0.0128	0.0176	0.0532	0.0048	0.0068	0.018	0.0264	0.0116	0.0148	0.0256	0.0908	0.0084	0.0348	0.0256	0.1092	0.2296	0.0112	0.0168	0.0112	0.0144	0.052	0.0096	0.3136		0.0136	0.0784	0.192	0.0124	0.232	0.018	0.0828	0.0044	0.0112
0.2104	0.0024	0.0148	0.0128	0.0196	0.0096	0.0156		0.0124	0.0184	0.0468	0.0276	0.28	0.0232	0.0024	0.022	0.0012	0.006	0.0032	0.04	0.0352	0.0392	0.0144	0.0148	0.1364	0.0004	0.01	0.1588	0.1364	3.66	0.0004	0.7764	0.0012	0.0148	0.0064	0.0068	0.0744	0.272		0.01	0.0204	0.0288	0.0324	0.0616	0.0144	0.0756	0.0016	0.0348
0.0076	0.0124	0.0192	0.012	0.012	0.0096	0.0372		0.0124	0.0004	0.0196	0.0132	0.0012	0.0164	0.0124	0.0128	0.0096	0.0032	0.06	0.0492	0.016	0.0324	0.0472	0.0492	0.042	0.1052	0.0256	0.0092	0.0426	0.0324	0.0088	0.008	0.0136	0.3196	0.0056	0.0112	0.012	0.0124		0.0124	0.0288	0.0124	0.3564	0.0004	0.102	0.0996	0.0612	0.0164
0.1576	0.002	0.0108	0.0048	0.006	0.0528	0.0384		0.0272	0.0008	0.1808	0.022	0.016	0.0624	0.1672	0.048	0.0116	0.0596	0.0136	0.164	0.0032	0.1124	0.0264	0.2452	0.2528	0.1308	0.0164	0.5272	0.2528	0.1276	0.0004	0.6452	0.0044	0.01	0.016	0.0012	0.0128	0.108		0.0132	0.01	0.016	0.0112	0.0052	0.0208	0.1828	0.0096	0.0132
0.0116	0.008	0.0764	0.002	0.0736	0.01	0.066		0.0364	0.21	0.06	0.0004	0.026	0.0096	0.0272	0.0456	0.002	0.02	0.0272	0.0116	0.0008	0.046	0.0176	0.0084	0.0208	0.9912	0.0004	0.05	0.042	0.008	0.0424	0.018	0.0136	0.0336	0.0228	0.0092	0.02	0.0152		0.0136	0.0784	0.0064	0.0008	0.2768	0.2032	0.0128	0.0136	0.01
0.0404	0.026	0.018	0.0096	0.0512	0.0148	0.0264		0.006	0.0404	0.0012	0.0512	0.0032	0.058	0.0264	0.0104	0.0104	0.1436	0.0852	0.0156	0.0044	0.016	0.0124	0.0028	0.8576	0.0312	0.0092	0.0028	0.8576	0.7448	0.0348	0.0096	0.004	0.0024	0.0136	0.002	0.0024	0.0128		0.0152	0.0012	0.0256	0.0388	0.1272	0.0036	0.0192	0.0016	0.024
0.0076	0.0072	0.0352	0.0008	0.0168	0.0192	0.0136		0.228	0.0012	0.0544	0.002	0.006	0.7684	0.0704	0.0128	0.0016	0.0476	0.0124	0.0048	0.0192	0.0168	1.378	0.0156	0.0184	0.116	0.0096	3.8572	0.0184	0.0032	0.1816	0.0128	0.0556	0.014	0.006	0.0088	0.0208	0.0072		0.0104	0.002	0.0028	0.1496	0.0132	0.002	0.008	0.0128	0.0148
0.0432	0.012	0.0152	0.0208	0.0288	0.056	0.012		1.9424	0.3108	0.0344	0.0972	0.0688	1.2484	0.0096	0.0364	0.0048	0.016	0.0084	0.0172	0.14	0.0508	0.0628	0.0116	3.2016	0.0252	0.0004	0.0072	0.006	0.0364	0.014	0.006	0.0352	0.0564	0.0416	0.0096	0.0124	1.0616		0.0136	0.0068	0.0116	0.0132	0.0116	0.026	0.0084	0.4388	0.0144
0.0072	0.0116	0.012	0.0124	0.0284	0.05	0.0104		0.0932	0.0024	0.0124	0.0436	0.0224	0.6128	0.0036	0.008	0.5748	0.0004	0.0124	0.006	0.0452	0.0204	0.2996	0.0012	0.0328	0.0248	0.0004	0.1776	0.0328	0.0448	0.0324	11.082	0.01	1.3276	0.0132	0.0544	0.0096	0.0368		0.0128	0.0068	0.36	0.0676	0.1536	0.054	0.0148	0.0524	0.0316
0.0296	0.0016	0.0756	0.0044	0.0132	0.012	0.014		0.0012	0.0044	0.0036	0.0204	0.016	0.0032	0.012	0.0348	0.1496	0.006	0.0012	0.0056	0.0044	0.0144	0.0188	0.0188	0.0068	0.0008	0.006	1.0936	0.126	0.0124	0.0092	0.0088	0.0116	0.0192	0.0324	0.0132	0.0816	0.0116		0.012	0.0724	0.1684	0.0124	7.5336	0.0084	0.3428	0.0684	0.0528
0.0088	0.0044	0.104	0.0392	0.0072	0.0292	0.0112		0.0068	0.0208	0.014	0.0724	0.0176	0.016	0.0124	0.0092	0.0608	0.0168	0.0128	0.0292	0.0076	0.0132	0.0076	0.0472	0.0064	0.178	0.738	0.0028	0.004	0.0232	0.026	0.0184	0.0008	0.0136	0.0032	0.0108	0.0244	0.0012		0.0148	0.0016	0.0332	0.0112	0.0308	4.7596	0.3524	0.3964	0.0756
0.0236	0.0004	0.0464	0.0144	0.02	0.0044	0.0132		0.186	15.8836	0.2852	0.004	1.072	0.064	0.0048	0.0096	0.0532	0.0108	0.0404	0.0176	0.0152	0.0204	0.0128	0.4128	0.008	0.0268	0.0008	0.0204	0.0084	3.8744	0.9624	0.0232	0.0056	0.0024	0.0424	0.0104	0.0104	0.0052		0.016	0.0392	0.0032	0.0132	0.5248	0.0092	0.0052	0.006	0.014
0.0356	0.0148	0.0088	0.0152	0.0124	0.0636	0.0272		0.006	0.0244	0.0184	0.3572	0.008	0.0228	0.9064	0.0128	0.01	0.0256	0.6732	0.0112	0.0332	0.0108	0.0068	0.0024	0.4996	0.622	0.0044	0.0076	0.052	0.0236	0.0616	0.016	0.0108	0.0272	0.0076	0.0024	0.004	0.0404		0.012	0.0984	0.012	0.0808	1.146	0.0068	0.0052	0.0304	0.0184
0.0492	0.0404	0.0444	0.0108	0.0204	0.0044	0.0164		1.7316	0.1028	0.08	0.0036	0.0008	0.0148	0.0012	0.0152	0.0148	0.016	0.0476	0.046	0.4612	0.0584	0.0008	0.0448	0.0212	0.0408	0.01	0.0836	0.0212	0.1464	0.3052	0.022	0.012	0.01	0.0128	0.0764	0.0116	0.0332		0.0132	0.0044	0.0044	0.0224	0.002	0.0008	0.0208	0.0056	0.0132
0.0072	0.0256	0.0216	0.0176	0.026	0.0112	0.0208		0.0128	0.0716	0.0424	0.012	0.0156	0.0232	0.1448	0.0112	0.0032	0.028	0.0208	0.0056	0.012	0.0008	0.0276	0.0184	0.0668	0.0708	0.4492	0.0244	0.038	0.0144	0.032	0.0028	0.0184	0.0248	0.0004	0.1696	0.024	0.0336		0.02	0.01	0.0728	0.1096	0.0004	0.0628	0.0208	0.0232	0.0432
0.0664	0.0684	0.0004	0.0304	0.0204	0.256	0.0136		0.0284	0.006	0.1064	0.0072	0.006	0.0024	0.02	0.0144	0.0072	0.0132	0.0008	0.5312	0.0128	0.014	0.0132	0.0072	0.0412	0.0044	0.1352	0.0184	0.0412	0.0888	0.052	2.5084	0.0044	0.1652	0.0116	0.01	0.0224	0.0064		0.01	0.022	0.4504	0.022	0.0364	0.02	0.0204	1.35	0.0536
0.0044	0.0176	0.01	0.0224	0.0796	0.0124	0.0164		0.0032	0.0116	0.0516	0.012	0.048	0.02	0.0128	0.0116	0.0168	0.0056	0.012	0.1036	0.058	0.0992	0.008	0.048	0.0952	0.02	0.012	0.0632	0.064	0.226	0.0384	0.018	0.0436	0.0136	0.0004	0.0088	0.0696	0.0032		0.0228	0.0068	0.0248	0.0596	0.0056	0.002	0.0056	0.4664	0.01
0.0208	0.0524	0.0108	0.0236	0.0712	0.0252	0.0072		0.0196	0.0212	0.0012	0.0136	0.362	0.1208	0.0128	0.0088	0.0032	0.0576	0.0116	0.004	0.0064	0.1264	0.0184	0.024	0.2744	0.2024	0.0368	0.1916	0.2744	0.0336	1.6416	0.0152	0.0476	0.0172	0.0004	0.0048	0.0096	0.1128		0.0136	0.0684	0.0504	0.0072	0.2972	0.0256	0.0024	0.0004	0.2196
0.0368	0.0292	0.012	0.0128	0.1036	0.018	0.0448		0.07	0.0388	0.0104	0.0076	0.0176	0.036	0.2268	0.0228	0.0108	0.0172	0.0652	0.0588	0.0196	0.034	0.0236	0.0072	0.0012	0.018	0.7164	0.0424	0.0012	6.7028	0.0396	0.0052	0.0352	0.0112	0.0004	0.0204	0.0232	0.092		0.0124	0.0088	0.002	0.0336	0.0192	0.0736	0.014	0.0168	0.0156
0.0004	0.0028	0.0044	0.0316	0.0068	0.0112	0.012		0.02	0.3132	0.0112	0.0192	0.0004	0.3824	0.0156	0.018	0.0036	0.0944	0.0044	0.0124	0.012	0.0032	0.012	0.2028	0.0172	0.0724	0.0104	0.0372	0.0172	0.0312	0.0024	0.0168	0.0144	0.0052	0.014	0.0036	0.0052	0.0652		0.0432	0.0064	0.0064	0.7636	0.0084	0.086	0.01	0.1516	0.1212
0.0332	0.0972	0.0028	0.0292	0.0096	0.0264	0.0172		0.0688	0.1452	0.0076	0.0472	0.0088	0.0108	0.0152	0.006	0.0216	0.0136	0.0016	0.0452	0.0108	0.0108	0.1508	0.0004	0.006	0.4312	0.0088	0.0048	0.006	0.0292	0.01	0.0096	0.016	0.0104	0.0004	0.0332	0.01	0.0364		0.012	0.1304	0.0024	0.5368	0.016	0.0068	0.0156	0.0116	0.0204
0.0236	0.018	0.0244	0.0476	0.1476	0.0212	0.0128		0.122	0.0536	0.2356	0.1928	0.2076	0.0496	0.0008	0.0048	0.0016	0.0088	0.0812	0.0148	0.0852	0.1312	0.0148	0.008	0.0004	0.042	0.03	0.0472	0.0004	0.004	0.0136	0.0108	0.0124	0.036	0.1728	0.0148	0.04	0.0668		0.0128	0.164	0.0624	0.0652	0.0008	0.0112	0.0116	0.0264	0.0132
0.0308	0.022	0.0124	0.01	0.028	0.0044	0.0128		0.072	0.0004	0.024	0.5568	0.1896	0.0364	0.0136	0.0192	0.0056	0.002	0.024	0.01	0.3764	0.0716	0.08	0.024	0.0024	0.044	0.0024	0.0064	0.0024	0.0076	0.092	0.2904	0.014	0.0032	0.01	0.0008	0.0112	0.0016		0.02	0.0144	0.0168	0.0156	0.0128	0.0204	0.1268	0.0108	0.0196
0.008	0.02	0.1088	0.008	0.0132	0.01	0.0628		0.002	0.0152	0.0004	0.008	0.0176	0.072	0.0064	0.0348	0.0268	0.028	0.0076	0.0084	0.2956	0.0124	0.012	0.014	0.0568	0.096	0.0616	0.024	0.0568	0.0092	0.4056	0.0372	0.034	0.0192	0.0096	0.008	0.072	0.0144		0.0556	0.0092	0.0536	0.0036	0.0404	0.0036	0.104	0.3184	0.0076
0.0036	0.0236	0.1012	0.0096	0.0052	0.0048	0.0488		0.4128	0.0004	0.006	0.0072	0.4432	0.0324	0.0216	0.0096	0.0072	0.018	0.0072	0.2636	0.0164	0.012	0.0104	0.026	0.0824	0.3188	0.0112	0.0384	0.0824	4.0704	0.0064	0.0132	0.0216	0.0036	0.0004	0.0124	0.01	0.0004		0.0096	0.1444	0.0716	0.0036	0.1844	0.0348	0.0256	0.0024	0.0148
0.0132	0.0128	0.0248	0.0048	0.0108	0.0208	0.008		0.006	0.0056	0.0044	0.0024	0.0004	0.0132	0.0196	0.0632	0.008	0.0072	0.0216	0.01	0.0448	0.012	0.0092	0.0032	0.0648	0.0176	0.0008	0.0112	0.0648	0.2972	0.2588	0.2564	0.0108	0.05	0.0096	0.0032	0.052	0.0008		0.0128	0.5532	0.0168	0.2732	0.0524	0.1024	0.0036	0.044	0.312
0.0052	0.104	0.0768	0.0156	0.0096	0.0096	0.0288		0.0144	0.228	0.2008	4.6456	0.0728	0.15	0.022	0.0096	0.0124	0.0544	0.0056	0.0784	0.2392	0.018	0.1804	0.0136	0.638	0.0104	0.0128	1.5412	0.6388	7.0368	0.058	0.0016	0.0012	0.0268	0.0168	0.0036	0.0012	0.006		0.0136	0.0104	0.0196	0.0564	0.0068	0.0292	0.1336	0.1288	0.0004
0.0036	0.0208	0.0304	0.0124	0.0004	0.01	0.0116		0.2772	0.4004	0.002	0.6908	0.0012	0.1796	0.014	0.0112	0.0012	0.1336	0.0124	0.006	0.0052	0.0268	0.0112	0.0328	0.002	0.0256	0.0092	0.0112	0.0024	0.0448	0.0016	0.2052	0.0024	0.0116	0.0136	0.0152	0.3124	0.0836		0.0112	0.3388	0.03	0.0004	0.0188	0.0156	0.7388	0.0112	0.2004
0.0064	0.0492	0.0068	0.01	0.012	0.0192	0.0044		0.0072	0.0408	0.0184	0.2504	0.0204	0.072	0.0144	0.0264	0.024	0.0284	0.0016	0.012	0.0512	0.0116	0.0112	0.0668	0.0192	0.002	0.0116	0.0268	0.0192	0.0484	0.0636	0.0468	0.0112	0.0344	0.0292	0.0044	0.014	0.0056		0.01	0.0472	0.0868	0.046	0.0204	0.1852	0.0748	0.012	0.0176
0.0088	0.1124	0.0088	0.0168	0.0008	0.0172	0.0004		0.0048	0.0288	0.16	0.0264	0.0376	0.0256	0.0288	0.8736	0.0008	0.0136	0.0088	0.0008	0.0108	0.0008	0.0764	0.032	0.0136	0.0252	0.0048	0.1324	0.0136	0.1164	0.0664	0.0036	0.016	0.0016	0.0368	0.0252	0.0048	0.0452		0.0072	0.0244	0.0108	0.0092	0.0296	0.0296	0.0128	0.088	0.0176
0.002	0.0092	0.0124	0.3268	0.012	0.0164	0.006		0.0004	0.0296	0.1196	0.0116	0.05	0.054	0.0032	0.0396	0.0552	0.0092	0.0172	0.0828	0.0676	0.0108	0.0008	0.016	0.0676	0.0028	0.038	0.0044	0.0676	0.0436	0.1892	0.0104	0.1644	0.014	0.0172	0.012	0.1816	0.0028		0.0108	0.0048	0.0308	0.0332	0.608	0.0024	0.1136	0.0492	0.0584
0.072	0.0364	0.1116	0.02	0.038	0.0044	0.0204		0.1	0.014	0.0092	1.3316	0.03	0.0804	0.094	0.0124	0.1112	0.0216	0.01	0.0124	0.014	1.1208	0.0136	0.1236	0.144	0.0844	0.0444	0.2316	0.15	0.0392	0.0008	0.036	0.0144	0.018	0.0124	0.0948	0.0012	0.3216		0.0104	0.004	0.0048	0.0536	0.02	0.0308	0.028	0.0128	0.0272
0.0064	0.0136	0.0268	0.0108	0.0388	0.01	0.0128		0.6764	0.0124	0.0548	0.0004	0.0132	0.4076	0.232	0.0032	0.0444	0.0224	0.0392	0.0156	0.0096	0.1488	0.0124	0.0196	0.0024	0.0708	0.0068	0.0176	0.0024	0.4404	0.7652	0.4368	0.0184	0.3192	0.0076	0.0128	0.0972	0.0072		0.0112	0.3604	0.126	0.0016	0.0284	0.0028	0.3164	0.0056	0.01
0.026	0.0092	0.124	0.022	0.0192	0.0152	0.0128		0.086	0.0312	0.0036	19.9848	0.01	0.008	0.0112	0.0332	0.0152	0.0044	0.0488	0.0052	0.0112	0.0708	0.0096	0.0004	0.0168	0.0556	0.006	1.1296	0.0168	0.0768	0.01	0.0116	0.0096	0.0412	0.0064	0.0024	0.0312	0.0124		0.0164	0.006	0.0148	0.002	0.0156	0.0204	0.0108	0.018	0.012
0.014	0.0044	0.0112	0.014	0.01	0.0096	0.0156		0.0128	0.0492	0.1132	0.2712	0.0004	0.07	0.0236	0.012	0.028	0.0128	0.0284	0.0008	0.1	0.0132	0.0036	0.0072	0.1332	1.1432	0.1768	0.0312	0.1332	0.756	0.0032	0.0056	0.0132	0.002	0.0068	0.016	0.0156	0.0324		0.01	0.0148	0.002	0.01	0.026	0.0256	0.004	0.048	0.0712
0.15	0.106	0.0096	0.016	0.158	0.0656	0.0136		0.1596	0.01	0.0004	0.0048	0.0068	0.0024	0.0148	0.0128	0.0128	0.0108	0.014	0.0164	0.0096	0.4816	0.0388	0.0164	0.0024	0.0928	0.004	0.0012	0.01	0.0032	0.0316	0.0424	0.0076	0.0032	0.006	0.014	0.0516	0.3708		0.01	0.012	0.268	0.0492	0.0032	0.0036	0.0132	0.0184	0.028
0.0572	0.0016	0.0364	0.012	0.0348	0.0524	0.0228		0.022	0.1684	0.4576	0.0264	0.01	0.0008	0.016	0.07	0.0272	0.0104	0.0152	0.0416	0.0192	0.0336	0.0504	0.4288	0.042	0.0064	0.0088	0.4788	0.042	0.2016	0.0136	0.1632	0.1268	0.0112	0.0128	0.012	0.0092	0.0212		0.0132	0.0428	0.0328	0.0024	0.0028	0.0092	0.6688	0.0264	0.0512
0.0692	0.0052	0.0028	0.0288	0.0324	0.0156	0.01		0.0696	0.02	0.0108	0.18	0.0412	0.0176	0.012	0.0172	0.0004	0.0088	0.0004	0.0064	0.0036	0.0856	0.1108	0.0268	0.004	0.3004	0.0128	0.0124	0.0048	1.0088	0.0304	0.0036	0.0244	0.008	0.0148	0.0168	0.0652	0.0292		0.0096	0.0216	0.0004	0.0072	0.0788	0.0188	1.348	0.1088	0.0572
0.0372	0.0464	0.0228	0.0128	0.0132	0.0412	0.012		0.0196	0.0028	0.0312	0.0112	0.0232	0.2848	0.0272	0.0096	0.0012	0.0068	0.0004	0.0156	0.05	0.0368	0.0008	0.0088	0.0596	0.0128	0.836	0.0004	0.0596	2.3508	0.0092	0.1324	0.004	0.0188	0.0148	0.0088	0.0272	0.0448		0.014	0.1768	0.0376	0.0288	0.0388	0.0244	0.0984	0.0084	0.0064
0.002	0.0008	0.01	0.0184	0.0076	0.0376	0.0148		0.1928	0.0072	0.0092	0.0008	0.0308	0.1552	0.002	0.01	0.024	0.01	0.01	0.0032	0.0116	0.0028	0.0408	0.0004	1.8444	0.0064	0.0156	0.0096	1.8444	0.3716	0.0312	0.0712	0.0264	0.0172	0.0136	0.0068	0.0116	0.0208		0.0536	0.0324	0.0124	0.01	0.3064	0.158	0.0468	0.0016	0.0136
0.0112	0.018	0.0664	0.0208	0.0024	0.0032	0.0196		0.0004	0.0284	3.7636	0.0136	1.9908	0.05	1.9064	0.012	0.0068	0.0096	0.024	0.0156	0.0916	0.0264	0.0048	0.2244	0.0104	0.0004	0.0012	0.3352	0.0104	0.0032	0.0288	0.0716	0.0084	0.01	0.0212	0.2684	0.02	0.004		0.01	0.0016	0.0328	0.142	0.002	0.4528	0.0008	0.0228	0.0112
0.0044	0.0036	0.0016	0.002	0.0216	0.0036	0.0128		0.0048	0.0048	0.0252	0.0464	0.0356	0.0172	0.0132	0.012	0.0424	0.0152	0.0124	0.0176	0.0136	0.01	0.0096	0.01	0.0532	0.0572	0.026	0.0152	0.0532	0.1288	0.0228	0.0028	0.0052	0.0124	0.0272	0.0172	0.0156	0.038		0.0116	0.008	0.01	0.0156	0.0092	1.4828	0.0136	0.0044	0.0388
0.0188	0.0004	0.0004	0.0008	0.0148	0.016	0.014		2.4436	0.032	0.1444	0.0128	0.0244	0.1292	0.0172	0.0044	0.0696	0.0412	0.0128	0.0116	0.0164	0.0068	0.0124	0.0276	0.0128	0.0312	0.0328	0.004	0.0128	0.026	0.0432	0.0428	0.0268	0.0004	0.002	0.0012	0.014	0.0172		0.0164	0.0256	0.378	0.0116	0.0136	0.0556	0.0244	0.012	0.0068
0.0344	0.0252	0.0276	0.182	0.0136	0.048	0.0136		0.0004	0.004	0.0264	0.0436	0.0192	0.0616	0.0104	0.0428	0.0008	0.0116	0.0136	0.0168	0.0164	0.2832	0.0696	0.0144	0.0824	0.0328	0.0168	0.0112	0.0824	0.2864	0.0404	0.0744	0.0072	0.0216	0.0764	0.0152	0.012	0.0136		0.0164	0.0052	0.0092	0.0232	0.0076	0.0004	0.6948	0.4052	0.0032
0.0064	0.006	0.0236	0.0112	0.0072	0.0156	0.0168		2.9844	0.0212	0.0264	0.1228	0.0052	0.004	0.0172	0.0144	0.0092	0.0404	0.018	0.0088	0.0316	0.018	0.3024	0.004	0.0224	0.0468	0.0148	0.3928	0.0224	0.0112	0.0168	0.0056	0.076	0.0052	0.0112	0.088	0.0164	0.3624		0.0332	0.1556	0.1308	0.1004	0.0004	0.0332	0.346	0.1228	0.3316
0.01	0.0548	0.0136	0.0548	0.0096	0.0216	0.0168		0.1268	0.0396	0.0096	0.5244	0.0056	0.0148	0.2348	0.0164	0.0092	0.0088	0.0072	0.014	0.0448	0.0272	0.4396	0.0204	0.0232	0.0076	0.0132	0.0356	0.004	0.0036	0.01	0.0336	0.0328	0.0192	0.076	0.012	0.0232	0.0008		0.062	0.0544	0.016	0.2164	0.0416	0.0004	0.0004	0.0284	0.0492
0.114	0.0252	0.11	0.008	0.0176	0.0124	0.01		0.0068	0.0108	0.0104	0.0364	0.0012	0.0084	0.026	0.0148	0.0056	0.0632	0.008	0.3128	0.0096	0.0156	0.0284	0.01	0.0208	0.0104	0.0008	0.0492	0.0208	0.0004	0.0012	0.002	0.05	0.0224	0.0076	0.0176	0.0144	0.04		0.0112	0.02	0.0192	0.0436	0.0032	0.0212	0.0308	0.0088	0.0012
0.0412	0.0208	0.0092	0.0112	0.0068	0.0044	0.0204		0.1676	0.012	0.1628	0.0212	0.018	0.0228	0.0324	0.014	0.1152	0.0516	0.0112	0.1392	0.0044	0.0924	0.0384	0.0112	0.0296	0.7588	0.0016	0.0016	0.0296	0.0508	0.0104	0.0144	0.0036	0.0112	0.0556	0.0536	0.0152	0.008		0.0528	0.05	0.0084	0.0884	0.0056	0.0028	0.0004	0.0004	0.0104
0.0252	0.0676	0.0048	0.002	0.0176	0.0212	0.0112		0.0164	0.0324	0.008	0.0148	0.0204	0.0064	0.0628	0.0136	0.0096	0.0192	0.0052	0.1052	0.016	0.0408	0.1436	0.0096	0.0024	0.0124	0.0904	0.0032	0.0024	0.0332	0.0096	0.012	0.0008	0.0708	0.0108	0.01	0.01	0.0976		0.0192	0.0624	0.0204	0.0084	0.2912	0.0152	0.1588	0.0476	0.0368
0.01	0.0096	0.3228	0.0004	0.0192	0.0124	0.0128		0.1216	0.0004	0.1072	0.0016	0.0068	0.0436	0.1264	0.3352	0.0224	0.0212	0.2528	0.0044	0.0124	0.1796	0.0016	0.034	0.014	0.0648	0.0396	0.0232	0.25	0.0564	0.01	0.0016	0.0464	0.0412	0.0112	0.0136	0.0284	0.004		0.0128	0.0624	0.1028	0.0052	0.1348	0.1512	0.0092	0.0128	0.104
0.0136	0.0128	0.0144	0.0372	0.0308	0.0436	0.0132		0.1128	0.0064	0.016	0.0108	0.0008	0.002	0.0188	0.0136	0.0304	0.0096	0.0188	0.004	0.0704	0.0032	0.0084	0.1604	0.0424	0.0108	0.3648	0.0144	0.0424	0.0336	0.0164	0.0084	0.0128	0.0284	0.102	0.002	0.0076	0.0004		0.028	0.03	0.0028	0.03	0.0468	2.0988	0.0008	0.0112	0.1584
0.0092	0.01	0.0988	0.0856	0.0112	0.0132	0.0196		0.1028	0.0596	0.0276	0.0016	0.024	0.0452	0.0112	0.1144	0.0704	0.0072	0.0016	0.0044	0.0624	0.014	0.0032	0.0064	0.0012	0.3948	0.0108	0.27	0.0012	0.1492	0.0232	0.0124	0.0448	0.0056	0.038	0.0448	0.0088	0.0244		0.0004	0.3032	0.0572	0.0424	0.0128	0.0152	0.0372	0.012	0.0116
0.0164	0.0016	0.012	0.0004	0.0088	0.028	0.012		0.0312	0.0392	0.1324	0.0876	0.0112	0.022	0.0116	0.0708	0.012	0.0968	0.0396	0.0896	0.0168	0.0016	0.0136	0.0004	0.5464	0.0112	0.0344	0.0596	0.5464	0.4412	0.0264	0.0128	0.012	0.0456	0.0184	0.0028	0.0192	0.0088		0.0004	0.1224	0.0204	0.4944	0.006	0.0496	0.0144	0.0104	0.0356
0.0096	0.0432	0.0096	0.022	0.0152	0.0016	0.014		0.002	0.0072	0.004	0.03	0.0276	0.0048	0.0112	0.0292	0.108	0.0188	0.0088	0.0172	0.0092	0.0104	0.028	0.0172	0.1356	0.4664	0.1712	0.1232	0.1356	0.0048	0.0004	0.0168	0.0096	0.0192	0.0132	0.0252	0.0112	0.0056		0.2724	0.0048	0.0008	0.0336	0.0424	0.02	0.0296	0.0148	0.0192
0.0016	0.0364	0.0152	0.002	0.0056	0.024	0.0748		0.0004	0.018	0.0068	0.0032	0.0068	0.0096	0.0096	0.0192	0.0068	0.0044	0.0116	0.012	0.0168	0.0924	0.048	0.01	0.0248	0.0088	0.0024	0.1344	0.0248	0.1652	0.0112	0.0444	0.0108	0.0096	0.016	0.0036	0.0028	0.0196		0.0132	2.0164	0.01	0.022	0.0176	0.0148	0.0084	0.014	0.0256
0.008	0.0324	0.0228	0.0056	0.0284	0.0252	0.0036		0.0016	0.026	0.1328	0.03	0.3528	0.012	0.0112	0.0004	0.0564	0.0044	0.0104	0.014	0.0136	0.0364	0.0508	0.0196	0.0156	0.01	0.0704	0.1988	0.0156	0.036	0.0056	0.004	0.0112	0.012	0.0308	0.0168	0.0208	0.036		0.0336	0.1724	0.2692	0.0044	0.1028	0.088	0.0032	0.0272	0.0184
0.0588	0.0344	0.0056	0.0084	0.0336	0.014	0.0128		0.0508	0.1108	0.0052	0.1164	0.0164	0.0184	0.0196	0.0244	0.0108	0.0012	0.0496	0.0116	0.002	0.0116	0.1336	0.0132	0.0008	0.0008	0.0624	0.0108	0.004	0.0012	0.0544	0.0004	0.0212	0.0472	0.0084	0.0732	0.018	0.0512		0.0132	0.0188	0.416	0.0356	0.7648	0.0068	0.0008	0.0212	0.0012
0.0028	0.0104	0.0384	0.0184	0.0008	0.01	0.0104		0.278	0.0132	0.0048	0.0872	0.0264	0.0036	0.0096	0.0228	0.0064	0.0188	0.018	0.0084	0.0144	0.0108	0.0104	0.1124	0.002	0.0164	0.0004	0.0204	0.002	0.064	0.5288	0.0272	0.0064	0.0164	0.0144	0.0244	0.014	0.0016		0.0224	0.2104	0.4092	0.0376	0.4144	0.032	0.016	0.0184	0.0124
0.0128	0.0024	0.0116	0.028	0.0312	0.0052	0.0364		0.1768	0.004	0.002	0.014	0.012	0.0284	0.12	0.0128	0.008	0.0128	0.012	0.0196	0.0096	0.0192	0.01	0.0748	0.0484	0.0056	0.0236	0.242	0.0484	0.1388	0.626	0.0104	0.0896	0.082	0.0056	0.0388	0.134	0.0004		0.0116	0.0144	0.0264	0.008	0.0792	0.0516	0.1864	0.0912	0.0368
0.018	0.0952	0.0128	0.0724	0.012	0.01	0.0104		0.0236	0.0356	0.0028	0.06	0.0976	0.0016	0.0216	0.0244	0.0016	0.0324	0.0104	0.0488	0.0336	0.0128	0.048	0.016	0.0864	0.006	0.0096	0.016	0.0864	0.0112	0.0484	0.0276	0.0176	0.0068	0.0016	0.026	0.0124	0.0116		0.0656	0.0032	0.0112	0.2892	0.044	0.0636	0.0256	0.328	0.0248
0.0336	0.0224	0.0396	0.0256	0.0044	0.0156	0.012		0.0004	0.0136	0.0112	0.0188	0.0016	0.024	0.156	0.0052	0.028	0.0204	0.032	0.012	0.0412	0.002	0.012	0.0216	0.002	0.0152	0.0008	0.0016	0.0022	0.0016	0.0408	0.0036	0.0016	0.0164	0.0156	0.0532	0.0228	0.0212		0.0748	0.0052	0.0064	0.0228	0.0124	0.2208	0.1232	0.0172	0.028
0.0004	0.0044	0.1772	0.014	0.0216	0.0236	0.0128		0.0008	0.0044	0.0284	0.0076	0.0436	0.1076	0.0408	0.0016	0.0628	0.0092	0.0108	0.0072	0.1872	0.0268		0.0004	0.412	0.0324	0.0552	0.5056	0.4128	0.1832	0.0468	0.076	0.0708	0.0464	0.04	0.0064	0.022	0.022		0.0148	0.1456	0.0192	0.0008	0.0004	0.0096	0.0016	0.0048	0.0124
0.0096	0.0092	0.0068	0.0128	0.0052	0.1212	0.0072		0.0212	0.0028	0.0036	0.0212	0.0024	7.9184	0.0444	0.0212	0.0016	0.0124	0.0084	0.0396	0.0592	0.0028		0.0164	0.008	0.018	0.0076	0.0092	0.0084	0.008	0.436	0.012	0.0036	0.0108	0.016	0.0464	0.0232	0.2428		0.1076	0.0172	0.1964	0.0124	0.0976	0.714	0.1196	0.0136	0.048
0.006	0.0132	0.008	0.0236	0.0268	0.0164	0.0268		0.4416	0.0212	0.014	0.0884	0.042	0.0048	0.1524	0.0608	0.056	0.02	0.0172	0.014	0.014	0.106		0.0104	0.0364	0.206	0.0404	0.0268	0.0364	1.9848	0.0008	0.3396	0.024	0.0116	0.014	0.0112	0.0112	0.0128		0.008	0.0016	0.5276	0.062	0.0128	0.0828	0.0104	0.0172	0.092
0.018	0.0164	0.0048	0.0092	0.016	0.0496	0.0116		0.0248	0.1536	0.0156	0.0244	0.298	0.0036	0.0448	0.0064	0.0032	0.06	0.0584	0.0116	0.4472	0.0004		0.0092	0.0008	0.044	0.0436	0.0064	0.0008	0.014	0.0068	0.0036	0.0108	0.0084	0.0684	0.0036	0.0184	0.1796		0.012	0.02	0.002	1.5972	1.2788	0.0584	0.0216	0.0108	0.0216
0.0368	0.036	0.0108	0.0396	0.0124	0.0136	0.014		0.0056	0.2468	0.0076	0.0076	0.1392	0.3416	0.258	0.0976	0.6332	0.0172	0.1564	0.0196	0.0136	0.0428		0.0452	0.0844	0.3156	0.0076	0.0764	0.0844	0.1096	0.0304	0.0108	0.0116	0.022	0.0172	0.0124	0.0416	0.0164		0.0132	0.0148	0.0328	0.0632	0.0012	0.006	0.1104	0.0012	0.0072
0.0008	0.0188	0.0496	0.0292	0.012	0.0144	0.0144		0.024	2.6752	0.0244	0.0004	0.0096	0.01	0.012	0.0152	0.044	0.0304	0.044	0.0272	0.0416	0.1056		0.0124	3.3516	0.0276	0.1076	0.1068	3.3516	0.0008	0.0168	0.4796	0.0068	0.0176	0.0168	0.0064	0.01	0.0148		0.274	0.0088	0.0132	0.1676	0.0016	0.724	0.0916	0.01	0.1476
0.0648	0.004	0.0616	0.0108	0.7512	0.0224	0.0216		0.0032	0.012	0.0008	0.0208	0.0848	0.0288	0.046	0.0188	0.002	0.0112	0.006	0.0208	0.0268	0.0324		0.008	0.0496	0.0304	0.0516	0.012	0.0496	0.0204	0.042	0.024	0.0116	0.0096	0.0008	0.0108	0.014	0.0088		0.0152	0.036	0.0444	0.0024	0.0004	0.0012	0.0172	0.0516	0.016
0.0056	0.012	0.0268	0.1928	4.2956	0.03	0.0172		0.0068	0.1884	0.0128	0.0188	0.0056	0.0044	0.0128	0.046	0.0168	0.0248	0.0268	0.0076	0.0196	0.0068		0.0136	0.4232	0.0088	0.0016	0.002	2.194	0.0388	0.0852	0.0336	0.0116	0.002	0.0384	0.0136	0.01	0.0056		0.0108	0.1228	0.0284	0.5072	0.0012	0.0056	0.0004	0.1252	0.1216
0.0368	0.0148	0.03	0.0152	0.0072	0.0004	0.0124		0.0124	0.0976	0.002	0.016	0.032	0.0272	0.0044	0.0128	0.0808	0.02	0.034	0.0012	0.0012	0.0468		0.0144	1.0368	0.0176	0.016	0.0584	1.0368	0.93	0.0084	0.0088	0.0052	0.048	0.0124	0.0176	0.002	0.004		0.0168	0.0012	0.0036	0.0092	0.0088	0.0208	0.0064	0.0028	0.0012
0.0364	0.0088	0.0016	0.0088	0.1724	0.0052	0.0128		0.3348	0.0024	0.0044	0.0096	0.012	0.012	0.014	0.0144	0.0436	0.0308	0.018	0.0444	0.0316	0.01		0.0152	0.002	0.0132	0.0128	0.0004	0.0026	0.2668	0.1844	0.0392	0.0108	0.0152	0.0148	0.0132	0.0136	0.0056		0.0304	0.0356	0.0088	0.01	0.032	0.0312	0.0272	0.0108	0.0192
0.046	0.0048	0.0064	0.0184	0.0224	0.0032	0.012		0.0196	0.024	0.0008	0.0212	0.0016	0.0004	0.0248	0.0448	0.0144	0.0176	0.0024	0.1256	0.0028	0.036		0.0424	0.002	0.0116	0.0384	0.0124	0.002	0.356	0.0112	0.0108	0.002	0.0284	0.0104	0.0636	0.0128	0.0028		0.0132	0.0188	0.0944	0.02	0.1808	0.0048	0.002	0.18	0.0344
0.0012	0.0208	0.0008	0.018	0.0004	0.016	0.1424		0.0904	0.0132	0.0864	0.0188	0.0112	0.0068	0.0224	0.0008	0.02	0.0112	0.002	0.1	0.0188	0.0264		0.0012	0.0124	0.0668	0.0324	0.436	0.0124	0.0364	0.0128	0.0068	0.008	0.0008	0.0028	0.0752	0.0008	0.0148		0.012	0.002	0.0948	0.2584	0.0012	0.212	0.012	0.0192	0.01
0.0096	0.0344	0.01	0.01	0.0132	0.0124	0.0028		0.0972	0.4716	0.6712	0.0008	0.022	0.0012	0.2228	0.0192	0.0016	0.0208	0.0012	0.006	0.0024	0.01		0.004	0.1668	0.008	0.014	0.0424	0.1668	0.1156	0.3804	0.02	0.01	0.0112	0.002	0.018	0.0104	0.0224		0.028	0.0104	0.2552	0.0076	0.1356	0.0152	0.0192	0.0336	0.1924
0.0472	0.0084	0.0824	0.3076	0.0264	0.0164	0.0152		0.0916	0.1536	0.056	0.0192	0.0136	0.0052	0.024	0.2292	0.0304	0.0236	0.016	0.0352	0.3484	0.006		0.012	0.0076	0.0364	0.0292	1.0112	0.0076	0.8556	0.0072	0.0348	0.0144	0.0088	0.012	0.0136	0.0188	0.098		0.0116	0.0012	0.0164	0.0064	0.1808	0.0032	0.0588	0.1256	0.0276
0.0044	0.0204	0.0128	0.0116	0.0324	0.0004	0.0064		0.0428	0.0376	0.0048	0.018	8.3584	0.0044	0.0004	0.0184	0.0784	0.004	0.0136	0.0112	0.004	0.154		0.0124	0.0216	0.038	0.0004	0.0176	0.0216	0.5136	0.0068	0.0048	0.0148	0.0028	0.0152	0.026	0.0192	0.0012		0.0124	0.0888	0.0384	0.0276	0.1248	0.0488	0.0696	0.0172	0.0168
0.0216	0.04	0.0112	0.01	0.112	0.0316	0.018		0.0232	0.0036	0.0124	0.0188	0.01	0.0464	0.0116	10.7212	0.0268	0.0208	0.0204	0.01	0.0076	0.0132		0.0128	0.0264	0.0176	0.0696	0.1172	0.0264	0.05	0.012	0.0052	0.0276	0.0308	0.0096	0.0988	0.0044	0.0112		0.0172	0.002	0.1152	0.23	1.266	0.0332	0.0004	0.014	0.1628
0.0412	0.016	0.0824	0.02	0.0148	0.01	0.0152		0.02	0.1908	0.0124	0.0132	0.026	0.0356	0.0116	0.0112	0.0324	0.014	0.246	0.0004	0.0176	0.0092		0.0392	0.1064	0.0112	0.0512	0.0016	0.1064	0.0004	0.0308	0.0632	0.0272	0.0116	0.026	0.1624	0.0044	0.7112		0.0804	0.0444	0.004	0.0412	0.0016	0.0432	0.0104	0.0004	0.002
0.0156	0.0324	0.0028	0.0748	0.0032	0.0256	0.0212		0.0456	0.0768	0.0088	0.2116	0.0472	0.0152	0.0552	0.0036	0.038	0.0184	0.0124	0.3072	0.0088	0.0068		0.0032	0.0288	0.014	0.0028	0.0024	0.0288	0.0608	0.0148	0.0188	0.0456	0.012	0.0144	0.0488	0.012	0.0436		0.0136	0.2752	0.002	0.0216	0.0752	0.0028	0.012	0.1	0.0092
0.01	0.0052	0.0096	0.0704	0.0328	0.0064	0.0328		0.046	0.03	0.0292	0.024	0.0364	0.016	0.4648	0.0356	0.0148	0.0284	0.0248	0.0276	0.0124	0.0168		0.0384	0.0004	0.0128	0.2148	0.002	0.01	0.0208	0.0008	0.0112	0.004	0.0064	0.0336	0.0904	0.014	0.0452		0.0208	0.06	0.0744	0.014	0.0024	0.0008	0.0232	0.0096	0.006
0.0432	0.0308	0.0104	0.0292	0.0136	0.148	0.0144		0.0036	0.008	0.0052	0.0104	0.0128	0.0212	0.0112	0.03	0.0276	0.0012	0.0256	0.0332	0.018	0.0088		0.0116	0.0192	0.0056	0.0324	0.1556	0.0192	0.0488	0.0036	0.012	0.03	0.0112	0.0184	0.0096	0.0152	0.0084		0.0104	0.404	0.0224	0.0248	0.0732	0.014	0.3236	0.1648	0.0172
0.15	0.0144	0.022	0.0176	0.0028	0.0108	0.0136		0.0112	0.0016	0.016	0.0112	0.0004	0.004	0.022	0.5616	0.0048	0.0816	0.014	0.0016	0.0184	0.528		0.02	0.0004	0.0496	0.1104	0.0152	0.0004	0.02	0.028	0.2944	0.024	0.012	0.0144	0.0124	0.0064	0.02		0.0004	0.002	0.0164	0.2264	0.002	0.0524	0.048	0.1128	0.0192
0.02	0.0068	0.0032	0.0344	0.1728	0.0372	0.0092		0.05	0.0392	0.0004	0.256	0.0084	0.0188	0.5924	1.2672	0.0024	0.176	0.0928	0.0192	0.0204	0.0024		0.0192	0.0108	0.0056	0.3544	0.0012	0.0108	0.2968	0.0128	0.0032	0.0128	0.0092	0.0076	0.0376	0.0104	0.006		0.0132	0.0208	0.0128	0.0056	0.038	0.004	0.0208	0.0172	0.0132
0.0048	0.0132	0.01	0.0112	0.0392	0.072	0.0224		0.016	0.0032	0.1396	0.0092	0.0236	0.002	0.0272	0.0168	0.0184	0.0072	0.0052	0.0124	0.0024	0.0136		0.0192	0.11	0.0012	0.0048	0.0004	0.1192	0.0004	0.0012	1.7976	0.012	0.0036	0.0252	0.0008	0.0788	0.006		0.0108	0.0044	0.0116	0.0892	0.0308	0.118	0.0096	0.002	0.01
0.0296	0.0508	0.012	0.0132	0.0136	0.0332	0.0004		0.0208	0.0212	0.01	0.0096	0.0696	0.0084	0.9472	0.0044	0.0036	0.0064	0.0192	0.0136	0.252	0.01		0.01	0.0004	0.0584	0.0196	0.0096	0.0004	0.3848	0.1596	0.1324	0.0132	0.0392	0.016	0.0152	0.0332	0.026		0.0212	0.0792	0.2504	0.0824	0.0056	0.0396	0.0004	0.0004	0.054
0.0572	0.024	0.014	0.0076	0.0116	0.0048	0.0072		0.2344	0.064	0.0096	0.0048	0.022	0.0548	0.02	0.0524	0.0024	0.0048	0.0172	0.0192	0.0004	0.17		0.072	0.1348	0.0164	0.0112	0.5152	0.02	0.2212	0.1648	0.836	0.0156	0.006	0.0128	0.0032	0.0108	0.0664		0.0412	0.0372	0.0068	1.6212	0.0412	0.0668	0.0676	0.0108	0.034
0.0172	0.0048	0.0044	0.0108	0.1244	0.022	0.0072		0.0252	0.0004	0.0064	0.0056	0.0016	0.018	0.0064	0.0176	0.0048	0.0052	0.0184	0.0048	0.1784	0.0112		0.254	0.0488	0.0208	0.0044	0.0204	0.0488	0.0404	0.0288	5.428	0.0128	0.0116	0.0152	0.0076	0.0124	0.0668		0.0192	0.0328	0.002	0.0076	0.07	0.0648	0.012	0.0012	0.286
0.034	0.0316	0.0132	0.0024	0.0216	0.0128	0.0128		0.1668	0.0208	0.0884	0.0112	0.0164	0.0632	0.0236	0.012	0.0796	0.0676	0.1036	0.0012	0.0576	0.0088		0.01	0.0004	0.0048	0.0372	0.1916	0.452	0.0296	0.7564	0.0072	0.0152	0.008	0.1312	0.0104	0.0136	0.3692		0.0128	0.0084	0.0128	0.0776	0.0076	0.01	0.0056	0.0652	0.0724
0.0124	0.0172	0.0764	0.012	0.014	0.0068	0.0132		0.02	0.0756	0.0344	0.0092	0.0016	0.0324	0.0664	0.116	0.0208	0.2124	0.0052	0.0168	0.0204	0.0524		0.0068	0.1716	0.0064	0.0288	0.0028	0.1716	0.6924	0.3212	0.018	0.0172	0.012	0.0124	0.0108	0.008	0.0556		0.0204	0.0604	0.048	3.1776	0.1948	0.2988	0.0008	0.0072	0.0184
0.0148	0.0108	0.0016	0.0132	0.0004	0.0264	0.0244		0.046	0.0004	0.018	0.05	0.0012	0.0756	0.0528	0.0724	0.046	0.0004	0.0084	0.0392	0.038	0.0132		0.02	0.2824	0.012	0.0052	0.0052	0.2824	0.0056	0.0184	0.2172	0.0392	0.0204	0.0112	0.0016	0.0048	0.026		0.1092	0.1708	0.0388	0.0124	0.0424	0.0472	0.0456	0.0444	0.0024
0.0376	0.0116	0.0348	0.0984	0.0184	0.0112	0.0044		0.4732	0.0192	0.0064	0.0384	0.0056	0.044	0.0164	0.0128	0.0128	0.0216	0.0052	0.0048	0.052	0.0016		0.0044	0.0008	0.0152	0.0332	0.0124	0.0008	0.0108	0.0116	0.0528	0.0656	0.0224	0.0004	0.0028	0.0016	0.0176		0.016	0.4996	0.0056	0.044	0.0212	0.0068	0.0224	0.0108	0.0424
0.0104	0.0004	0.0124	0.0396	0.0484	0.012	0.0332		0.2892	0.0004	0.1324	0.0052	0.0036	0.168	0.0188	0.0728	0.1224	0.0116	0.0136	0.0164	0.0792	0.0196		0.0012	0.0168	0.042	0.0032	0.0516	0.0168	0.0064	0.0024	0.0084	0.0028	0.0108	0.0096	0.0532	0.0132	0.0092		0.0292	0.0276	0.2804	0.0732	0.0812	0.0004	0.16	0.0108	0.0752
0.006	0.0284	0.166	0.0016	0.0324	0.0028	0.0136		0.022	0.0004	0.0068	0.0088	0.004	0.1332	0.1892	0.002	0.0212	0.0152	0.0032	0.0032	0.1996	0.0036		0.1248	0.05	0.1024	0.0388	0.0268	0.0572	0.01	0.0136	0.0464	0.0596	0.0232	0.0124	0.0132	0.0092	0.0364		0.02	0.1368	0.0332	0.1084	0.0332	0.0004	0.0104	0.0188	0.018
0.0624	0.0128	0.0132	0.0044	0.0772	0.0012	0.0104		0.03	0.0356	0.0628	0.0032	0.032	0.284	0.0232	0.0368	0.0172	0.0264	0.0128	0.1012	0.0188	0.0004		0.1024	0.7528	0.0008	0.0236	0.0112	0.7528	0.2624	0.0108	0.098	0.018	0.0084	0.0032	0.0152	0.0096	0.0264		0.002	0.004	0.018	0.3896	0.1396	0.018	0.0088	0.0112	0.0128
0.0092	0.0412	0.0204	0.0016	0.0444	0.0312	0.0136		0.0144	0.0052	0.1116	0.0236	0.012	0.0108	0.0076	0.018	0.0116	0.0008	0.0212	0.2492	0.068	0.0036		0.0344	0.0808	0.062	0.1224	0.8808	0.0808	0.0004	0.0008	0.0108	0.0032	0.01	0.0528	0.012	0.0496	0.0136		0.012	0.0156	0.0088	0.0176	0.054	0.002	0.026	0.0476	0.11
0.0128	0.0092	0.0908	0.0108	0.0004	0.1608	0.0224		0.432	0.0004	0.0056	0.0004	0.0104	0.0112	0.9068	0.012	0.0104	0.0112	0.0032	0.0116	0.0088	0.0092		0.046	0.0004	0.0148	0.0756	0.0068	0.0004	0.0004	0.0188	0.0092	0.0116	0.0004	0.0148	0.0108	0.01	0.0224		0.012	0.0384	0.1492	0.0144	0.0052	0.5304	0.1708	0.0132	0.0116
0.0044	0.0288	0.0228	0.0196	0.0164	0.0132	0.0112		0.0104	0.038	0.002	0.0208	0.0344	0.0004	0.0024	0.002	0.0076	0.0084	0.0092	0.0412	0.0032	0.0328		0.0432	0.0612	0.0132	0.3748	0.02	0.0612	0.0628	0.0972	0.0072	0.0292	0.0056	0.03	0.0116	0.0072	0.0284		0.0116	0.0024	0.1112	0.2872	0.0188	0.0236	0.0404	0.0236	0.0204
0.0444	0.0268	0.0128	0.0132	0.034	0.0152	0.0104		0.0348	0.1088	0.0364	0.0156	0.0228	0.0052	0.0064	0.02	0.0196	0.0132	0.018	0.0328	0.3036	0.0148		0.0396	0.0064	0.3408	0.084	0.2988	0.0064	0.0004	0.008	0.8684	0.0536	0.0308	0.0452	0.014	0.006	0.0056		0.0664	0.048	0.0296	0.0248	0.0028	0.0568	0.246	0.006	0.044
0.0068	0.0348	0.0116	0.098	0.0904	0.014	0.0256		0.1256	0.0316	0.0216	0.0004	0.0048	0.2044	0.032	0.0236	0.0152	0.0608	0.0252	0.0236	0.0268	0.0792		0.0096	0.0004	0.0352	0.07	0.004	0.052	0.004	0.0004	0.0176	0.0104	0.0488	0.0004	0.0256	0.012	0.108		0.012	1.6996	0.0088	0.1188	0.0064	0.0108	0.6016	0.0088	0.0576
0.0276	0.0024	0.0944	0.0148	0.008	0.006	0.0104		0.0148	0.0196	0.0204	0.0096	0.0004	0.008	0.0548	0.002	0.122	0.0088	0.0412	0.0244	0.0064	0.01		0.0104	0.0024	0.0172	0.0036	0.0192	0.044	0.032	0.0184	0.0064	0.0168	0.074	0.0084	0.0052	0.002	0.1752		0.028	0.1108	0.0164	0.0008	0.032	0.032	0.0056	0.0564	0.0108
0.0304	0.3176	0.0408	0.0132	0.0268	0.0168	0.0424		0.1156	0.0124	0.0756	0.0032	0.03	6.3496	0.0028	0.0316	0.0076	0.3244	0.0264	0.2216	0.0352	0.0096		0.0032	0.024	0.0056	0.1744	1.5568	0.0246	0.0008	0.0016	0.3352	0.0204	0.01	0.038	0.0004	0.0216	0.0156		0.0112	0.0548	0.0116	0.0292	0.0256	0.0692	0.0084	0.0768	0.0172
0.002	0.0104	0.014	0.0088	0.0164	0.0196	0.012		0.0312	0.4088	0.0052	0.11	0.006	0.01	0.0072	0.0132	0.0312	0.0056	0.0016	0.036	0.0392	0.0132		0.0256	0.0024	0.0248	0.0032	0.0236	0.0024	0.002	0.0004	0.0288	0.0072	0.0128	0.038	0.0112	0.0088	0.1924		0.0192	0.0532	0.0024	0.0068	0.0064	0.0004	0.9568	0.1392	0.0324
0.0096	0.0396	0.0272	0.0024	0.014	0.0348	0.0152		0.5764	0.004	0.008	0.024	0.0028	0.0604	1.4296	0.0132	0.0016	0.0304	0.018	0.0752	0.0284	0.024		0.0052	0.002	0.006	2.5008	0.0448	0.11	0.622	0.0456	0.0012	0.01	0.0128	0.0268	0.014	0.044	0.0872		0.014	0.132	0.014	0.0004	0.1032	0.0124	0.0044	0.0016	0.004
0.0016	0.0268	0.0132	0.0572	0.0332	0.0172	0.0084		0.0144	0.018	0.0312	0.0152	0.006	0.5532	0.0116	0.0252	0.0064	0.0136	0.0044	0.018	0.0128	0.028		0.0328	0.1124	0.0296	0.0216	0.3988	0.1124	0.8316	0.0572	0.0024	0.0148	0.0008	0.0784	0.0216	0.0552	0.022		0.034	0.0052	0.0152	0.712	0.0028	0.0004	0.002	0.0104	0.012
0.0136	0.0164	0.01	0.0168	0.0472	0.0116	0.014		0.0204	2.6832	0.0104	0.062	0.0092	1.0936	0.0164	0.0632	0.0804	0.0036	0.012	0.1692	0.0188	0.3532		0.0092	0.0112	0.0056	0.0076	1.12	0.0112	0.0008	0.014	0.0088	0.0496	0.014	0.0124	0.0112	0.0148	0.1892		0.01	0.028	0.0004	0.1376	0.0096	0.0216	0.028	0.084	0.0124
0.028	0.0168	0.0216	0.1456	0.012	0.0116	0.01		0.0256	0.0356	0.0248	0.0464	0.3556	0.0056	0.8764	0.0064	0.2352	0.01	0.0116	0.0124	0.024	0.01		0.0088	0.0072	0.0144	0.0048	0.012	0.0072	0.0288	0.0076	0.0852	0.3	0.082	0.0064	0.0108	0.0136	0.0092		0.0604	0.042	0.0468	0.0004	0.018	0.0464	0.0132	0.0028	0.5256
0.0128	0.0292	0.012	0.0028	0.0148	0.0068	0.0164		0.088	0.0036	0.0056	0.0048	0.0016	0.0256	0.002	0.0268	0.024	0.0204	0.0024	0.25	0.0296	0.0096		0.014	0.0608	0.0068	0.3956	0.0096	0.0608	0.0004	0.0212	0.0212	0.24	0.016	0.0136	0.0116	0.0012	0.0052		0.0188	0.0264	0.0624	0.1112	0.0076	0.0236	0.0308	0.0092	0.0304
0.1864	0.0012	0.0596	0.0024	0.1544	0.0148	0.0104		1.9276	0.0124	0.0116	0.052	0.0084	0.0144	0.154	0.012	0.0112	0.0348	0.0104	0.0032	0.2328	0.0208		0.0024	0.0904	0.006	0.0216	0.7368	0.0904	1.396	0.0184	0.0156	0.1056	0.0144	0.1448	0.0524	0.0112	0.0076		0.0948	1.0456	0.0396	0.0368	0.0028	0.0268	0.0168	0.0056	0.014
0.01	0.0084	0.108	0.0072	0.0084	0.0004	0.0272		0.0284	0.646	0.0364	0.0068	0.0012	0.004	0.0032	0.0128	0.196	0.0044	0.0104	0.0936	0.006	0.0032		0.0228	0.018	0.0272	0.0124	0.0452	0.0186	2.5052	0.0888	0.0564	0.01	0.014	0.0016	0.0052	0.0004	0.0028		0.0256	0.0004	0.026	0.0108	0.0284	0.0004	0.0136	0.0112	0.014
0.0792	0.0092	0.0616	0.0076	0.01	0.0164	0.0164		0.108	0.4176	0.0036	0.0024	0.0236	0.004	0.0464	0.01	0.0104	0.0096	0.012	0.1868	0.032	0.0024		0.032	0.376	57.314	0.0468	0.0136	0.3766	0.0004	0.2636	0.0356	0.0596	0.008	0.0124	0.0036	0.1012	0.054		0.022	0.002	0.0044	0.0064	0.0828	0.0528	0.0184	0.0184	0.0076
0.0164	0.0076	0.0148	0.012	0.026	0.0084	0.0172		1.0824	0.2104	0.0136	0.028	0.1772	0.0628	0.0156	0.0072	0.1732	0.0228	0.0008	0.012	0.0112	0.0176		0.006	0.0032	0.0004	0.05	0.0232	0.03	0.0232	0.0004	0.01	0.0616	0.0084	0.0272	0.012	0.0184	0.0124		0.01	0.0168	0.0288	0.6116	0.1544	0.0216	0.002	0.0104	0.0148
0.0124	0.0288	0.0012	0.0128	0.0044	0.0248	0.0128		0.0004	0.0108	0.0764	0.0188	0.0576	0.004	0.028	0.0036	0.0388	0.0196	0.4308	0.0004	0.3592	0.0184		0.0212	0.1768	0.0864	0.0852	0.0236	0.1768	0.0044	0.0028	0.014	0.012	0.27	0.0004	0.048	0.0072	0.002		0.0104	0.0732	0.0108	0.012	0.06	3.7376	0.004	0.0644	0.016
0.0136	0.0064	0.0172	0.0604	0.0008	0.0116	0.012		0.0416	0.0504	0.0412	0.0144	0.018	0.0104	0.0196	0.0036	0.0224	0.0708	0.0396	0.0168	1.388	0.0624		0.0052	0.0008	0.0012	0.0008	0.1124	0.0008	0.0124	0.0796	0.0592	0.0476	0.0668	0.018	0.0212	0.0096	0.0692		0.0128	0.0288	0.1044	0.0184	0.0856	0.0224	0.0048	0.06	0.0748
0.0428	0.0768	0.006	0.1448	0.0016	0.0128	0.0132		0.3008	0.0472	0.0148	0.4404	0.0436	0.0664	0.0064	0.01	1.3248	0.0908	0.0048	0.0128	0.1336	0.0304		0.0092	0.028	0.1388	0.0128	0.0848	0.028	0.0308	0.0004	0.0148	0.1612	0.0092	0.0032	0.0236	0.0096	0.082		0.0124	0.2712	0.0192	0.0004	0.022	0.308	0.0284	0.0112	0.0276
0.038	0.0604	0.0116	0.1348	0.0132	0.0248	0.012		0.0168	0.004	0.0948	0.0068	0.1108	0.1304	0.0152	0.0124	0.0128	0.0132	0.0008	0.01	0.0128	0.0456		0.4372	0.05	0.0928	0.0232	0.0132	0.054	0.0264	0.0056	0.0232	0.0852	0.0084	0.09	0.0016	0.0408	0.026		0.0756	0.2256	0.0228	0.0052	0.0036	0.004	0.04	0.0124	0.0116
0.0124	0.0112	0.0236	0.0024	0.0116	0.0072	0.0136		0.3496	0.0036	0.0048	0.012	0.0144	0.0272	0.0128	0.0196	0.2376	0.1424	0.0472	0.016	0.0008	0.0076		0.0052	0.0096	0.1504	0.0072	1.1672	0.0096	0.0004	0.0156	0.0216	0.0168	0.0056	0.1208	0.0028	0.0132	1.1976		0.0208	1.832	0.0016	0.0356	0.0868	0.4964	0.0636	0.03	0.0252
0.0008	0.0772	0.0008	0.0112	0.012	0.0384	0.004		0.0024	0.0164	0.5596	0.0172	0.2352	0.1044	0.0016	0.0996	0.0004	0.026	0.0504	0.0264	0.0124	0.0064		0.0392	0.0036	0.0004	0.026	1.568	0.012	0.0004	0.0244	0.0132	0.0808	0.0052	0.0444	0.0184	0.0648	0.0088		0.0136	0.0192	0.0128	0.0268	0.1116	0.0028	0.034	0.0212	0.2288
0.0304	0.014	0.0016	0.0104	0.0092	0.02	0.0104		0.0132	0.1	0.0024	0.0232	0.0096	0.6	0.0644	0.0024	0.1068	0.14	0.012	0.0004	0.204	0.0896		0.0252	0.0724	0.006	0.0416	0.1904	0.0724	0.0004	0.0084	0.056	0.0332	0.0112	0.0356	0.0152	0.0184	0.0092		0.0264	0.0252	0.0048	0.0128	0.004	0.0184	0.1132	0.11	0.0208
0.0148	0.0528	0.0096	0.0156	0.0108	0.0028	0.0192		0.0956	0.1156	0.1104	0.0044	0.0388	0.0324	0.0056	0.0128	0.018	0.0136	0.0004	0.0056	0.0044	0.0148		0.0104	0.1672	0.038	0.0564	0.052	0.1672	0.0004	0.0352	0.0304	0.0364	0.0128	0.0228	0.0244	0.0128	0.0244		0.2272	0.4496	0.0004	0.0004	0.0048	0.026	0.0164	0.022	0.0148
0.0204	0.0316	0.0592	0.0104	0.09	0.0152	0.0532		0.1068	0.6208	0.0148	2.0024	0.012	0.212	0.0132	0.0016	0.1404	0.1472	0.0016	0.026	0.0028	0.004		0.0028	0.0004	0.0044	0.0012	0.0188	0.0004	0.168	0.0008	0.042	0.032	0.0128	0.0172	0.0008	0.0308	0.0148		0.0148	0.0016	0.0896	0.2276	0.0492	0.0036	0.0116	0.0172	0.0128
0.012	0.0176	0.0088	0.0096	0.022	0.0128	0.01		0.0588	0.0228	0.008	0.0072	0.0424	0.0352	0.032	0.0256	0.1012	0.012	0.0124	0.0368	0.0016	0.068		0.0152	0.0016	0.0108	0.0628	0.004	0.0016	0.0004	0.0928	0.1632	0.0156	0.0072	0.068	0.0308	0.0188	0.0056		0.0584	0.246	0.0648	0.0004	0.006	0.0072	0.0112	0.2728	0.0096
0.036	0.0216	0.0696	0.0008	0.004	0.0236	0.0188		1.7104	0.1172	0.484	0.0008	0.0056	0.0176	0.0452	0.01	0.0204	0.0064	0.0204	0.0084	0.024	0.01		0.0644	0.0048	0.106	0.01	0.008	0.052	0.3624	0.0872	0.0028	0.042	0.0132	0.0328	0.0088	0.0296	0.0076		0.0016	0.0548	0.924	0.0004	0.2548	0.0076	0.0044	0.0432	0.0284
0.0368	0.0092	0.0072	0.01	0.0164	0.0088	0.0028		0.5912	0.036	0.0136	0.1384	0.0236	0.0048	0.0076	0.0024	0.002	0.0096	0.0012	0.0104	0.0016	0.1484		0.0136	0.0024	0.0192	0.0724	0.4924	0.0024	0.0312	0.0524	0.8784	0.0716	0.0052	0.0068	0.0216	0.0164	0.0024		0.0072	0.0032	0.0624	0.0372	0.0136	0.1212	0.0444	0.0296	0.0572
0.012	0.0072	0.0388	0.012	0.2348	0.0836	0.0172		0.4688	0.0004	0.0248	0.0472	0.0076	1.2696	0.018	0.0196	0.0272	0.1368	0.0036	0.0192	0.0268	0.0048		0.0084	0.0012	0.0132	0.012	0.0096	0.0012	0.0004	0.0264	0.0252	0.0748	0.0008	0.01	0.0152	0.014	0.0204		0.0224	0.0024	0.0004	0.0048	0.252	0.0084	0.0004	0.158	0.01
0.0116	0.016	0.0116	0.0136	0.0008	0.0148	0.008		0.0052	0.0832	0.0428	0.0156	0.0076	0.0504	0.0008	0.0172	0.0224	0.006	0.012	0.036	0.0024	0.02		0.0136	0.0072	0.1816	0.0604	0.2632	0.0072	0.0004	0.002	0.0156	0.0072	0.0316	0.0156	0.0252	0.0184	0.0092		0.0292	1.1236	0.0108	0.0116	0.0172	0.0272	0.0324	0.0128	0.0148
0.0276	0.0008	0.0152	0.036	0.0112	0.0108	0.0172		1.1772	0.02	0.0212	0.0012	0.0108	0.0292	0.0024	0.0544	0.012	0.0028	0.058	0.0232	0.0004	0.0104		0.004	0.7992	0.0316	0.008	0.1148	0.7992	0.0004	0.008	0.012	0.0236	0.014	0.0116	0.0188	0.022	0.0096		0.0104	0.01	0.0044	0.814	0.5688	0.0348	0.1004	0.0104	0.0104
0.026	0.0084	0.0088	0.0144	0.0348	0.0168	0.0336		0.034	0.0212	0.0252	1.2028	0.0444	0.1152	0.092	0.0112	0.0248	0.0028	0.01	0.0116	0.0032	0.0116		0.0032	0.044	0.1492	0.0076	0.0384	0.0448	0.0184	0.0568	0.1032	0.0052	0.0112	0.0176	0.0108	0.0112	0.0224		0.0236	0.0072	0.1248	0.0028	0.0036	0.014	0.006	0.0048	0.0204
0.008	0.024	0.0284	0.0088	0.0244	0.0112	0.0188		0.0424	0.0104	0.0096	0.0052	0.0032	0.1176	0.0108	0.0028	0.074	0.018	0.0244	0.0164	0.018	0.0016		0.0088	0.1036	0.012	0.0136	0.0028	0.1036	0.1404	0.0548	0.0132	0.0112	0.0116	0.0108	0.0128	0.0128	0.092		0.056	0.0012	0.0236	0.0036	0.0228	0.0084	0.0332	0.0068	0.0196
0.0304	0.168	0.0008	0.002	0.0068	0.0692	0.0496		0.0004	0.1228	0.0328	0.0556	0.0316	0.0196	0.0124	0.012	0.024	0.0032	0.012	0.0448	0.0256	0.0232		0.0468	0.0172	0.1464	0.2244	0.2424	0.0172	4.4868	0.066	0.0156	0.0092	0.1	0.0104	0.0024	0.01	0.0108		0.01	0.014	0.1544	0.0044	0.084	0.0964	0.3824	0.0212	0.0148
0.0216	0.0192	0.0216	0.0072	0.0416	0.0196	0.0012		0.0524	0.4088	0.0184	0.0236	0.0028	0.0096	0.0112	0.0244	0.3716	0.012	0.0116	0.0196	0.008	0.0128		0.0172	0.4552	0.0072	0.068	0.0144	0.4552	0.0004	0.0088	0.0092	0.0248	0.0092	0.0212	0.0172	0.0424	0.0172		0.006	0.0076	0.0044	0.0004	0.0652	0.0084	0.5836	0.1776	0.0084
0.0136	0.0016	0.058	0.0104	0.014	0.012	0.0272		0.0256	0.1384	0.0672	0.0116	0.004	0.01	0.0456	0.0344	0.0072	0.0328	0.0164	0.0352	0.4968	0.0008		0.0168	0.2628	0.1592	0.0008	0.0484	0.2628	0.004	0.0008	0.0388	0.0128	0.0128	0.0152	0.0428	0.0076	0.0184		0.0712	0.01	0.0096	0.0064	0.1876	0.0084	0.0044	0.0356	0.0124
0.0192	0.0396	0.0184	0.0344	0.01	0.0092	0.0148		0.0068	0.0124	0.0512	0.0216	0.0008	0.0088	0.0056	0.0216	0.002	0.006	0.006	0.0356	0.3044	0.0136		0.1744	0.0128	0.0052	0.0712	0.0128	0.064	0.0132	0.4092	0.0556	0.2032	0.6768	0.0148	0.012	0.0036	0.0264		0.0244	0.0124	0.0156	0.0544	0.0936	0.0452	0.0108	0.0164	0.022
0.0236	0.0232	0.0036	0.1304	0.0092	0.0104	0.018		0.0872	0.0028	0.0096	0.0404	0.0328	0.0184	0.0004	0.042	0.002	0.0168	0.02	0.218	0.0084	0.0136		0.0076	0.0204	0.0164	0.0088	0.008	0.0204	0.0004	0.0136	0.0124	0.0132	0.002	0.0028	0.0572	0.214	0.2652		0.0036	0.0004	0.0008	0.0276	0.0748	0.0356	0.0472	0.0212	0.0064
0.0244	0.014	0.0172	0.0096	0.0156	0.0236	0.0116		0.0004	0.022	0.0748	0.0208	0.0148	0.0008	0.008	0.0108	0.0004	0.01	0.018	0.0144	0.3288	0.0028		0.02	0.0004	0.1228	0.02	7.0672	0.00044	0.0004	0.0216	0.0228	0.0148	0.1916	0.0144	0.11	0.0252	0.0308		0.0316	0.0124	0.0252	0.0176	0.4892	0.0344	0.0136	0.8	0.0212
0.0012	0.0928	0.0012	0.0128	0.0228	0.0248	0.0188		0.0012	0.0144	0.002	0.0036	0.0156	0.0016	0.0124	0.0244	0.1716	0.0216	0.02	0.0036	0.0016	0.03		0.0152	0.1004	0.0068	0.0184	0.0004	0.1004	0.0004	0.0084	0.036	0.0116	0.0172	0.0128	0.0244	0.0368	0.026		0.208	0.0328	0.004	0.4196	0.0476	0.0036	0.0012	0.0152	0.0172
0.0056	0.024	0.0364	0.0084	0.0248	0.0152	0.0136		0.0004	0.1916	0.0176	0.0052	0.018	0.0064	0.016	0.0436	0.0044	0.024	0.0048	0.0076	0.0056	0.0044		0.0164	0.028	0.1364	0.0192	0.338	0.0284	0.0004	0.0032	0.0192	0.016	0.0068	0.012	0.0104	0.0008	0.0064		0.0172	0.0048	0.0328	0.2116	0.2072	0.0056	0.0216	0.6016	0.0116
0.0036	0.0392	0.0048	0.0996	0.0156	0.0152	0.0156		0.0176	0.0428	0.0484	0.1084	0.0004	0.0176	0.0152	0.0008	0.008	0.0116	0.0312	0.0264	0.0776	0.0136		0.0136	0.024	0.0076	0.0604	0.0512	0.0248	0.0004	0.0004	0.0188	0.0148	0.01	0.0112	0.0396	0.0404	0.4632		0.036	0.0076	0.2728	0.0712	0.0392	0.0212	0.1392	0.1664	0.0104
0.0064	0.0116	0.0112	0.0012	0.0376	0.0136	0.0132		0.0636	0.1384	0.01	0.4032	0.0268	0.0032	0.52	0.076	0.1608	0.014	1.1796	0.0804	0.002	0.0052		0.016	0.6884	0.0644	0.0448	0.0648	0.6884	0.0036	0.0128	2.8192	0.0384	0.002	0.0064	0.0104	0.0128	0.006		0.0256	0.004	0.1384	0.0248	0.0056	0.3616	0.0252	0.0392	0.0132
0.0056	0.022	0.0136	0.0176	0.024	0.0008	0.0004		0.0016	0.0196	0.0424	0.046	0.0164	0.1072	0.1176	0.0252	0.01	0.0104	0.0108	0.0024	0.0144	0.0048		0.0144	0.452	0.1612	0.0104	0.0348	0.4524	0.0108	0.1868	0.0076	0.0592	0.08	0.0044	0.0164	0.0048	0.0004		0.0096	0.02	0.004	2.308	0.0364	0.0156	0.0016	0.2304	0.01
0.0972	0.0016	0.008	0.0068	0.0112	0.022	0.0092		0.1184	0.0156	0.2068	0.0484	0.0052	0.8444	0.0164	0.0124	0.0004	0.0192	0.014	0.0148	0.0124	0.0216		0.0144	0.09	0.2032	0.0052	0.616	0.0952	0.0004	0.1728	0.4512	0.0232	0.108	0.0136	0.0028	0.056	0.0004		0.0168	0.382	0.0064	0.104	0.0156	0.0008	0.0384	0.0072	0.0024
0.1836	0.0108	0.0004	0.0052	0.0136	0.0124	0.012		0.0004	0.034	0.006	0.1112	0.082	0.0032	0.0328	0.0056	0.014	0.0164	0.0024	0.0196	0.0016	0.0128		0.0068	0.01	0.0528	0.0008	0.0004	0.01	0.0004	0.002	0.0076	0.0112	0.0016	0.0148	0.0048	0.0036	0.0324		0.01	0.1384	0.0032	0.1328	0.0024	0.0096	0.01	0.0012	0.0564
0.002	0.0192	0.018	0.0112	0.0024	0.0244	0.032		0.0804	0.0428	1.2756	0.0708	0.0272	0.0144	0.008	0.0156	0.0016	0.0436	0.0088	0.0644	0.0016	0.174		0.0508	0.0016	0.02	0.4716	0.0072	0.09	0.206	0.0004	0.0132	0.0124	0.0072	0.0248	0.0104	0.01	0.0072		0.0152	0.002	0.0064	0.0676	0.0776	0.0092	0.064	0.0772	0.0224
0.1632	0.004	0.0128	0.2288	0.0148	0.0124	0.0032		0.004	1.6872	0.3756	0.3432	0.0048	0.0464	0.0052	0.0156	0.0124	0.0152	0.0036	0.0808	0.0044	0.0056		0.0136	0.3472	0.0424	0.0004	0.0008	0.3472	0.0004	0.0056	0.0252	0.0328	0.0148	0.0112	0.0048	0.0108	0.2444		0.01	0.088	0.2188	0.0424	0.0084	0.0232	0.01	0.5604	0.0176
0.016	0.01	0.0036	0.0192	0.0132	0.012	0.0012		0.004	0.8484	0.0012	0.0008	0.046	0.008	0.0868	0.0128	0.0196	0.014	0.0004	0.0328	0.0256	0.0024		0.0096	0.5332	0.0108	0.012	0.0852	0.5332	0.0032	0.008	0.0032	0.0108	0.02	0.0104	0.0184	0.0596	0.0072		0.1256	0.0152	0.0148	0.0336	0.214	0.0704	0.004	0.01	0.0128
0.0052	0.0152	0.0068	0.024	0.0136	0.0144			0.0368	0.0396	0.4712	0.0012	0.0396	0.018	0.0448	0.0152	0.006	0.0104	0.0168	0.0436	0.0004	0.0144		0.0096	0.0072	0.0284	0.0728	0.7072	0.0072	0.004	0.6428	0.062	0.0088	0.0416	0.0024	0.0068	0.008	0.0016		0.0168	0.0592	0.1124	0.008	3.3804	0.0124	0.0228	0.0732	0.0208
0.006	0.0228	0.1068	0.012	0.0076	0.0044			0.0276	0.0012	0.106	0.0016	0.0296	0.0304	0.0004	0.0172	0.0116	0.0532	0.0044	0.0004	0.0768	0.028		0.0076	0.1612	0.0076	0.1236	0.0216	0.1612	1.4128	0.002	0.0448	0.0148	0.0248	0.0188	0.0096	0.0056	0.0024		0.0032	0.0212	0.0084	0.028	0.0368	0.0744	0.0148	0.0076	0.1264
0.08	0.0144	0.0192	0.0128	0.016	0.01			0.006	0.012	0.0004	0.0012	0.0336	6.9308	0.012	0.0152	0.0016	0.0044	0.04	0.0204	0.0984	0.1864		0.026	0.0676	0.0152	0.0096	0.0432	0.0676	0.0008	0.0852	0.0168	0.0196	0.0128	0.012	0.0148	0.0332	0.0372		0.0088	0.0592	0.1216	0.03	0.0096	0.0088	0.0936	0.3	0.0296
0.0348	0.0076	0.1284	0.0448	0.0164	0.0908			0.0072	0.7596	0.0204	0.0264	0.0428	0.002	0.0232	0.006	0.2412	0.026	0.0008	0.01	0.0376	0.2132		0.0124	0.0108	0.0064	0.0008	0.0184	0.016	0.0052	0.018	0.0136	0.018	0.044	0.046	0.0012	0.0252	0.0328		0.0308	0.3696	0.3272	0.03	0.122	0.0612	0.0256	0.3432	0.0832
0.0028	0.0064	0.008	0.0136	0.032	0.01			0.0148	0.0224	0.0016	0.1208	0.0384	0.052	0.0076	0.0244	0.0168	0.0792	0.0132	0.052	0.0192	0.0524		0.0176	0.09	0.0304	0.0152	0.0108	0.0976	0.0652	0.0068	0.0836	0.01	0.0028	0.0068	0.0028	0.0408	0.0196		0.0684	0.0356	0.0112	0.0184	0.0148	0.0388	0.7048	0.028	0.016
0.1524	0.014	0.0012	0.0064	0.0224	0.0116			0.012	0.0488	0.7524	0.0132	0.6152	0.0024	0.638	0.012	0.0312	0.0112	0.0116	0.0192	0.0456	0.0172		0.0204	0.6896	0.014	0.136	0.01	0.6896	0.0008	0.098	0.0012	0.0204	0.0252	0.026	0.0124	0.0876	0.0568		0.0044	0.0608	0.006	0.0356	0.052	0.0336	0.0212	0.0036	0.012
0.186	0.0024	0.0272	0.0068	0.0304	0.0024			0.004	0.0116	0.0172	0.0108	0.0016	0.0532	0.138	0.0112	0.0004	0.0096	0.0328	0.0136	0.474	0.034		0.006	0.0224	0.0188	0.3936	0.002	0.016	0.0016	0.1524	0.0128	0.0044	0.01	0.0156	0.0152	0.1508	0.0124		0.0292	0.166	0.0136	0.0084	0.54	0.012	0.0588	0.016	0.0076
0.01	0.0152	0.0144	0.054	0.0092	0.0124			2.2216	0.2192	0.0204	0.0076	0.0056	0.0032	0.5708	0.0148	0.0232	0.0872	0.0124	0.016	0.1224	0.0752		0.0308	0.0716	0.0532	0.0028	0.0256	0.0716	0.3236	0.0536	0.0224	0.0004	0.0368	0.004	0.1064	0.0028	0.0308			0.0428	0.0308	0.0072	0.01	0.0272	0.0304	0.0732	0.0232
0.0708	0.004	0.0044	0.022	0.0128	0.0056			0.0008	0.0304	0.0148	0.0216	0.01	0.0048	0.0284	0.0416	0.0068	0.0028	0.0108	0.1404	0.012	0.0112		0.0172	1.5412	0.006	0.0736	0.042	0.008	0.0112	0.0028	0.0484	0.0108	0.0128	0.006	0.0068	0.0036	0.02			0.2368	0.0048	0.084	0.1228	1.394	0.4724	0.0584	0.0068
0.0008	0.0084	0.0008	0.01	0.0064	0.0096			0.0428	0.034	0.0024	0.0212	0.0068	0.488	0.0356	0.01	0.1056	0.0156	0.0736	0.0188	0.022	0.01		0.0084	0.0284	0.012	0.028	0.018	0.0284	0.0004	0.0432	0.0136	0.0004	0.1084	0.0088	0.0212	0.0224	0.0048			0.012	0.0388	0.0024	0.0116	0.0144	0.0188	0.0228	0.0188
0.0064	0.0676	0.014	0.0076	0.0088	0.0024			0.0004	0.0116	0.0316	0.3644	0.0168	0.0752	0.0016	0.0316	0.0104	0.0104	0.0008	0.0196	0.0124	0.0112		0.0044	0.0012	0.0088	0.0024	0.152	0.0012	0.0172	0.1244	0.0056	0.0088	0.0112	0.0408	0.0212	0.01	0.1136			0.0232	0.028	0.202	0.0428	0.0508	0.0328	0.036	0.016
0.0412	0.0356	0.0096	0.006	0.0096	0.002			0.6908	0.0112	0.0512	0.0132	0.0216	0.0268	0.0768	0.0056	0.0008	0.0132	0.0128	0.0128	0.0036	0.008		0.0068	0.0056	0.0148	0.0304	0.0168	0.0056	0.016	0.0148	0.0112	0.0052	0.084	0.0068	0.014	0.0072	0.222			0.038	0.014	5.1156	0.038	0.424	0.0024	0.0448	0.0132
0.0256	0.0044	0.202	0.0092	0.0204	0.0136			0.0064	0.0016	0.054	0.0152	0.0392	0.0016	0.0032	0.03	0.008	0.014	0.0236	0.1176	0.0332	0.0124		0.0032	0.1408	0.0284	0.0024	0.0796	0.1408	0.0004	0.0048	0.0136	0.0188	0.0172	0.0684	0.0084	0.022	0.0152			0.3148	0.0368	0.0108	0.552	0.0048	0.0012	0.09	0.0108
0.0164	0.0028	0.0128	0.0148	0.0152	0.0164			0.0416	0.0028	0.0016	0.02	0.0004	0.0204	0.0128	0.0248	0.01	0.0456	0.0148	0.0016	0.0076	0.0112		0.0068	0.2192	0.0172	0.0304	0.5528	0.002	0.2292	0.0092	0.4004	0.0108	0.012	0.0388	0.0396	0.0256	0.0096			0.6024	0.0092	0.0184	0.0052	0.1624	0.0204	0.0908	0.0044
0.0224	0.0232	0.0596	0.0128	0.0028	0.0076			0.154	0.0004	0.0004	0.0088	0.0056	0.002	0.0224	0.012	0.004	0.0148	0.0172	0.0228	0.0112	0.0144		0.0112	0.1468	0.0232	0.002	0.0384	0.1468	0.0004	0.0124	0.014	0.002	0.0104	0.0068	0.01	0.0092	0.0332			0.0032	0.034	0.0488	0.004	0.1208	0.032	0.0028	0.024
0.022	0.006	0.0276	0.03	0.034	0.0188			0.0148	1.6848	0.0264	0.012	0.068	0.0016	0.3932	0.0168	0.0332	0.0788	0.0568	0.008	0.014	0.0204		0.002	0.072	0.0004	0.012	0.1952	0.0722	0.0176	0.0508	0.9208	0.0344	0.0184	0.008	0.0108	0.0436	0.0352			0.0012	0.0036	0.0056	0.0108	0.0008	0.0372	0.0492	0.0364
0.016	0.0084	0.0332	0.0188	0.0048	0.0776			1.1348	1.6928	0.018	0.0112	0.0152	0.0004	0.0096	0.0488	0.0016	0.004	0.1224	0.0084	0.034	0.012		0.0108	0.0944	0.1388	0.1516	0.0392	0.0944	0.0004	0.0136	1.0036	0.0144	0.0328	0.0024	0.012	0.024	0.0196			0.0268	0.1592	0.0208	0.0008	0.0844	0.0056	0.0012	0.0404
0.0148	0.0004	0.18	0.0096	0.002	0.01			0.0696	0.1648	0.096	0.1624	0.0028	0.0308	1.5436	0.1572	0.0212	0.0124	0.01	0.0212	0.0248	0.1104		0.0252	0.0468	0.086	0.0032	0.4484	0.0468	0.0004	0.0196	0.0116	0.0456	0.0064	0.0172	0.0136	0.0504	0.0096			0.0012	0.0136	0.002	0.3384	0.044	0.0024	0.462	0.012
0.0008	0.0156	0.0184	0.0084	0.008	0.0116			0.0228	0.0004	0.0232	0.014	0.0104	0.3588	0.0148	0.0216	0.1864	0.0184	0.0088	0.016	0.0028	0.0116		0.0156	0.4048	0.0152	0.056	0.03	0.4048	0.0004	0.0656	0.0096	0.0432	0.0444	0.01	0.0452	0.0384	0.0012			0.0004	0.0084	0.1156	0.0004	0.0032	0.006	0.016	0.0036
0.1924	0.004	0.01	0.0004	0.004	0.0344			0.0744	0.194	0.012	0.078	0.01	0.038	0.0768	0.0136	0.0052	0.0032	0.0148	0.008	0.0296	0.0024		0.0104	0.0096	0.026	0.0092	0.0656	0.0096	0.5324	0.0356	0.0168	0.01	0.0088	0.0088	0.0044	0.0432	0.022			0.2668	0.002	0.128	0.1332	0.0004	0.2076	0.2168	0.0368
0.036	0.1892	0.0124	0.0096	0.0524	0.0444			0.0216	0.006	3.3704	0.0092	0.086	0.0092	0.0276	0.0352	0.0208	0.0016	0.0184	0.0192	0.0228	0.1992		0.0096	0.0036	0.0052	0.0216	0.006	0.0036	0.0012	0.044	0.0144	0.0416	0.01	0.0632	0.0052	0.0124	0.1328			0.0052	0.006	0.0012	0.084	15.6032	0.0508	0.0296	0.014
0.0004	0.0176	0.018	0.014	0.026	0.0016			0.0024	0.0292	0.0756	0.068	0.0004	0.1052	0.0208	0.016	0.01	0.0084	0.014	0.0044	0.1164	0.0264		0.0016	0.4368	0.9832	0.0048	0.192	0.4368	0.0416	0.1808	0.35	0.0276	0.0112	0.1536	0.0152	0.0116	0.0456			0.1872	0.0208	0.0168	0.0936	0.0104	0.0376	0.036	0.042
0.0164	0.1624	0.0008	0.012	0.0088	0.062			0.0508	0.1568	0.0056	0.016	0.0156	0.3904	1.814	0.0184	0.0352	0.0096	0.0292	0.0104	0.0004	0.0228		0.0668	0.0812	0.02	0.0072	0.0644	0.046	0.0252	0.16	0.0212	0.028	0.0352	0.4484	0.016	0.0364	0.03			0.0716	0.0152	0.03	0.028	0.01	0.0032	1.616	0.0176
0.0032	0.0076	0.0256	0.0012	0.0804	0.014			0.022	0.0028	0.0292	0.0204	1.128	0.072	0.0408	0.0708	0.0532	0.014	0.0392	0.0004	0.0436	0.0136		0.012	0.0016	0.0244	0.0096	0.0104	0.004	0.0004	0.2852	0.5044	0.0008	0.0036	0.0096	0.0128	0.0008	0.0472			0.0148	0.028	0.0524	0.0004	0.0072	0.0048	0.0116	0.0092
0.3616	0.0052	0.0064	0.018	0.5224	0.0124			0.7688	0.0112	0.0232	0.008	0.068	1.4664	0.0124	0.0124	0.0132	0.0284	0.0156	0.1	0.0056	0.0012		0.014	0.094	0.0872	0.0916	0.1204	0.0946	0.0408	0.0132	0.004	0.0268	0.0104	0.0176	0.004	0.114	0.0128			0.4676	0.0156	0.0136	0.0012	0.0104	0.0052	0.0376	0.0144
0.0356	0.014	0.0016	0.0024	0.0088	0.0864			0.0052	0.0056	0.0248	0.3852	0.0284	0.004	0.0164	0.0124	0.0148	0.0096	0.0656	0.0128	0.0212	0.0512		0.008	0.0364	0.0048	0.0088	0.008	0.0364	0.0004	0.0608	0.0304	0.08	0.0004	0.01	0.0232	0.0196	0.0188			0.0404	0.0016	1.4756	0.0008	0.0524	0.0068	0.0308	0.0152
0.0496	0.0256	0.01	0.03	0.0056	0.0072			0.0316	1.9744	0.0308	0.0028	0.2704	0.0088	0.0188	0.0224	0.1348	0.0116	0.01	0.0068	0.128	0.0088		0.0908	0.0124	0.004	0.0188	0.1236	0.0124	0.1664	0.0168	0.0236	0.0408	0.0148	0.0124	0.0496	0.0236	0.0044			0.0236	0.012	0.1656	0.0244	0.0172	0.1064	0.0084	0.0296
0.0064	0.0324	0.0008	0.0124	0.0344	0.0116			0.01	0.01	0.0388	0.0048	0.0728	0.0436	0.016	0.0156	0.0052	0.0104	0.0064	0.0892	0.0076	0.052		0.0016	0.0124	0.002	0.5368	0.0436	0.0124	0.016	0.0708	0.0856	0.0024	0.024	0.0004	0.0044	0.01	0.0248			0.012	0.006	19.8244	0.0252	0.2208	0.016	0.052	0.0092
0.0028	0.0032	0.0088	0.0344	0.02	0.0128			0.0004	0.0032	0.0312	0.0232	0.0352	0.1176	0.0528	0.0204	0.0244	0.0128	0.0328	0.006	0.0632	0.0112		0.0544	0.528	0.0172	0.0024	0.0496	0.5284	0.0916	0.0084	0.014	0.0132	0.114	0.0052	0.0132	0.0216	0.0032			0.5992	0.4292	0.002	0.088	0.114	0.6284	0.012	0.0236
0.048	0.018	0.014	0.0076	0.0592	0.0128			0.2176	0.0016	0.0176	0.018	0.0344	2.1032	0.168	0.0116	0.0012	0.0412	0.0164	0.0248	0.0124	0.0068		0.0388	1.2024	0.0076	0.0364	0.0672	1.2024	0.016	0.0228	0.0024	0.0132	0.0064	0.0188	0.0096	0.0272	0.0192			0.4424	0.0624	0.018	0.002	0.006	0.0064	0.0732	0.012
0.0492	0.016	0.0248	0.0156	0.0016	0.0588			0.0412	0.2748	0.0196	0.0092	0.0328	0.0004	0.014	0.0132	0.0024	0.0124	0.0484	0.0132	0.0424	0.0128		0.0128	0.2356	0.2504	0.0248	0.0496	0.2356	0.0068	0.5484	0.1824	0.0044	0.0004	0.0236	0.016	0.0064	0.1256			0.0628	0.1324	0.1752	0.1888	1.9664	0.004	0.0096	0.0116
0.0168	0.0168	0.0092	0.016	0.0208	0.0072			0.0004	0.1292	0.0108	0.0188	0.0128	0.0576	0.0004	0.0052	0.0448	0.0512	0.0008	0.0056	0.012	0.0032		0.0116	0.1168	0.0004	0.0092	0.0064	0.1168	0.0848	0.0556	0.0288	0.014	0.0092	0.0056	0.0208	0.012	0.0148			0.0284	0.002	0.1164	0.0016	0.0184	0.018	0.1108	0.0332
0.0104	0.0168	0.0008	0.0176	0.0532	0.01			0.05	0.008	0.136	0.0272	0.0084	0.0072	0.4832	0.004	0.0044	0.016	0.0008	0.0472	0.0096	0.008		0.9116	0.0056	0.0024	0.0112	0.008	0.0056	0.0404	0.134	0.0168	0.0148	0.0192	0.0104	0.004	0.0136	0.0012			0.0056	0.0136	0.0108	3.9292	0.6988	0.0668	0.022	0.0144
0.0228	0.016	0.0208	0.0124	0.0072	0.0152			2.24	0.0908	0.042	0.0364	0.1836	0.0032	0.0004	0.0176	0.004	0.0128	0.0176	0.0312	0.0232	0.0144		0.0144	0.7012	0.1248	0.0056	0.102	0.7012	0.0348	0.0528	0.018	0.012	0.01	0.0164	0.0264	0.0048	0.0396			0.06	0.0784	0.0172	0.0248	0.0116	0.0212	0.0156	0.0216
0.0144	0.0024	0.0016	0.0124	0.0196	0.0188			0.0576	0.0116	0.1448	0.0184	0.0236	0.1844	0.1092	0.0144	0.0604	0.0092	0.0252	0.0152	0.0136	0.0224		0.0064	0.032	0.0188	0.1228	0.0088	0.0326	0.0316	0.0076	0.02	0.0076	0.0132	0.0196	0.0608	0.0212	0.034			0.042	0.1452	0.0188	0.0056	0.0248	0.002	0.0088	0.254
0.1116	0.0032	0.0184	0.0176	0.0012	0.0224			0.0636	0.1164	0.0076	0.1824	0.0364	0.1504	0.02	0.0436	0.0896	0.0112	0.0596	0.0056	0.0068	0.0004		0.0488	0.016	0.4748	0.0064	0.0104	0.0164	2.1228	0.0052	0.022	0.0232	0.014	0.006	0.0128	0.0144	0.0604			0.1448	0.0132	0.1492	0.0196	0.046	0.0108	0.0504	0.0872
0.0232	0.0024	0.0136	0.0052	0.0304	0.0312			0.012	0.0044	0.052	0.0096	0.0404	0.6032	0.0956	0.0508	0.0024	0.0228	0.016	0.0596	0.0008	0.0044		0.0096	4.1388	0.02	0.0048	0.0044	4.1388	0.01	0.0108	0.0192	0.0088	0.0076	0.0364	0.0476	0.0168	0.0044			0.0484	0.198	0.0016	0.0024	0.0184	0.0008	0.2152	0.0104
0.0008	0.0516	0.0044	0.0096	0.2192	0.0124			0.0004	0.0716	0.0084	0.0192	0.0056	0.0036	0.0112	0.0084	0.0588	0.0124	0.0128	0.0012	0.0132	0.008		0.1124	0.002	0.0092	0.0232	0.0224	0.0028	0.0132	0.0248	0.012	0.0032	0.0008	0.0096	0.0028	0.0404	0.024			0.036	0.0156	0.0156	0.0244	0.0108	0.0116	0.5596	0.0144
0.0232	0.014	0.0792	0.0188	0.006	0.0104			0.0072	0.1156	0.0852	0.0032	0.0476	0.5604	0.0492	0.014	0.0228	0.0168	0.0016	0.1336	0.0096	0.014		0.0124	0.068	0.0104	0.02	12.0392	0.0682	3.6612	0.0488	0.01	0.014	0.004	0.0032	0.0096	0.0072	0.1676			0.0148	0.1612	1.1672	0.0028	0.0148	0.0044	0.0112	0.0124
0.0112	0.0508	0.0092	0.01	0.0284	0.0092			0.0096	0.0292	0.6716	0.0044	0.1088	0.0796	0.0136	0.0092	0.0208	0.0248	0.0216	0.006	0.0264	0.0076		0.0116	0.0028	0.01	0.0116	0.0004	0.0028	0.0008	0.074	0.0088	0.0096	0.0308	0.0096	0.0492	0.0384	0.0056			0.0004	0.1904	0.0044	0.0148	0.01	0.0448	0.016	0.0152
0.0056	0.0048	0.016	0.0116	0.0512	0.0108			0.2024	0.7916	0.0856	0.066	0.0088	0.0244	0.016	0.0376	0.1804	0.0108	1.9128	0.0848	0.0256	0.002		0.0132	0.002	0.0064	0.0008	0.2936	0.0022	0.176	0.0132	0.006	0.0132	0.0132	0.0004	0.0108	0.0132	0.006			0.0396	0.0132	0.3836	0.2328	0.0016	0.2124	0.0064	0.0144
0.3428	0.0132	0.0692	0.0004	0.0208	0.0408			0.6	0.0752	0.0524	0.01	0.2328	0.036	0.008	0.0124	0.0236	0.0016	0.0116	0.1368	0.0212	0.0184		0.1404	0.0084	0.0868	0.0008	1.196	0.004	0.1028	0.0056	0.1032	0.0008	0.012	0.0244	0.0012	0.014	0.014			0.4168	0.0368	0.0192	0.066	0.008	0.0092	0.0052	0.0192
0.0256	0.026	0.0076	0.1532	0.0024	0.0124			0.012	0.0192	0.0008	0.0032	0.056	0.508	0.0452	0.012	0.0244	0.0224	0.0136	0.0008	0.0068	0.0024		0.116	0.0004	0.13	0.0316	0.0104	0.0004	0.1176	0.0044	0.0748	0.01	0.0856	0.072	0.0228	0.0084	0.0336			0.0404	0.0008	0.0388	0.034	0.1192	0.0004	0.0036	0.0128
0.0092	0.0168	0.5784	0.004	0.0012	0.0156			0.0196	0.0536	0.0104	0.0076	0.0208	0.004	0.0184	0.0412	0.0332	0.0096	0.024	0.0088	0.0064	0.0244		0.0788	0.2772	0.0156	0.0028	0.0012	0.2772	0.0348	0.0008	0.016	0.012	0.0096	0.0196	0.012	0.0128	0.0136			0.2492	0.0024	0.2876	0.004	0.0044	0.03	0.054	0.0108
0.0136	0.1336	0.0096	0.0044	0.0136	0.0016			0.006	0.0356	0.0416	0.0012	0.0568	0.352	0.004	0.1252	0.0088	0.0028	0.0388	0.218	0.0268	0.1092		0.0256	0.0004	0.0244	0.0088	0.0132	0.0004	0.1188	0.0436	0.0044	0.0076	0.014	0.0164	0.0128	0.014	0.01			0.5212	0.0136	0.0068	0.0036	0.0124	0.0136	0.008	0.0304
0.004	0.0736	0.036	0.0276	0.0336	0.0248			0.004	0.0064	0.0052	0.092	0.0116	0.0452	0.01	0.0832	0.0096	0.0044	0.496	0.0212	0.014	0.0084		0.0244	5.3656	0.0472	0.13	0.0252	5.3656	0.0348	0.0232	0.0768	0.018	0.0008	0.0324	0.032	0.0036	0.0004			0.0112	0.0024	0.0736	0.0884	0.0436	0.0128	0.0124	0.0456
0.0188	0.0004	0.0012	0.006	0.02	0.0112			0.0412	0.06	0.0116	0.002	0.0104	0.5408	1.4768	0.6032	0.0108	0.0204	0.0024	0.0024	0.0004	0.0144		0.0152	0.7428	0.0232	0.0116	0.0004	0.7428	0.0252	0.0152	2.2252	0.008	0.0176	0.1416	0.0324	0.0304	0.0752			0.0016	0.0172	0.0432	0.0212	0.0136	0.0308	0.038	0.0076
0.1768	0.0188	0.0172	0.0324	0.0444	0.0012			0.2256	0.0032	0.0244	0.0544	0.0028	0.0212	0.0276	0.0308	0.1228	0.0076	0.0048	0.012	0.0032	0.01		0.014	0.0184	0.2792	0.0164	0.0396	0.0184	0.0448	0.0012	0.0212	0.0104	0.0292	0.022	0.0748	0.11	0.0968			0.692	0.0128	3.07	0.0132	0.0624	0.9168	0.0188	0.0172
0.1184	0.01	0.0352	0.014	0.2876	0.0132			0.0296	0.0112	0.0156	0.0896	0.0996	0.0116	0.1408	0.012	0.0404	0.0068	0.0228	0.008	0.0116	0.0088		0.0056	0.0676	0.0116	0.0036	0.0032	0.0676	0.116	0.0312	0.1164	0.0108	0.0124	0.0976	0.0384	0.008	0.036			0.0896	0.0048	0.01	0.008	0.0804	0.0444	0.0144	0.1252
0.0196	0.0316	0.2116	0.0356	0.006	0.0184			0.0036	0.0084	0.0064	1.0224	0.0036	0.0072	0.026	0.016	0.1424	0.0948	0.018	0.0176	0.0384	0.01		0.012	0.0068	0.0668	0.0116	0.0016	0.0068	0.1376	0.0136	0.0408	0.0056	0.01	0.0184	0.046	0.0068	0.0004			0.0048	0.0256	0.0032	0.1928	0.0012	0.02	0.0532	0.0236
0.0108	0.0104	0.0084	0.012	0.2216	0.0128			0.1332	0.028	0.6248	0.0168	0.0316	0.0048	0.0276	0.0104	0.0048	0.0228	0.0852	0.1408	0.0012	0.0204		0.0568	0.368	0.016	0.1464	0.2516	0.3682	1.086	0.0268	0.0136	0.0128	0.0048	0.0004	0.0096	0.014	0.0456			0.0636	0.0204	0.0284	0.0188	0.0056	0.428	0.0048	0.028
0.0356	0.234	0.0416	0.0096	0.0056	0.01			0.0088	0.0152	0.0244	0.0576	0.0448	0.0124	0.0064	0.0212	0.0072	0.0132	0.0064	0.036	0.0416	0.0036		0.0088	0.028	0.0288	0.7184	0.1548	0.0282	0.7116	0.0104	0.0308	0.034	0.2312	0.0152	0.0348	0.0048	0.0632			0.0416	0.6824	0.3796	0.0012	0.0072	0.0068	0.0016	0.0088
0.014	0.0452	0.0108	0.016	0.062	0.0124			0.002	0.0012	0.0008	0.018	0.0144	0.1692	0.0104	0.014	0.0276	0.0132	0.0208	0.0112	0.0196	0.0064		0.0184	0.1648	0.288	0.036	0.046	0.1648	0.2788	0.7104	0.0232	0.0116	0.018	0.0156	0.006	0.014	0.008			0.0628	0.0808	1.9144	0.0644	0.016	0.036	0.1036	0.232
0.0288	0.028	0.034	0.0128	0.1984	0.01			0.0148	2.6128	0.0028	0.0068	0.042	0.0072	0.0104	0.0012	0.0936	0.0192	0.0112	0.0272	0.0092	0.0328		0.0112	0.066	0.0172	0.0572	0.018	0.0662	0.0448	0.0884	0.07	0.028	0.0036	0.012	0.0004	0.1252	0.3852			0.0396	6.624	0.3544	0.0108	0.0084	0.0136	0.0012	0.0196
0.0416	0.0016	0.01	0.0092	0.0024	0.0116			0.0696	0.0548	0.11	0.0132	0.0476	4.7316	0.0132	0.01	0.0512	0.0356	0.0136	0.0092	0.0232	0.0312		0.0076	0.036	0.0024	0.0036	0.014	0.0368	0.7704	0.2108	0.0444	0.0488	0.0132	0.0448	0.0104	0.0148	0.002			0.0092	0.0464	0.2056	0.0088	0.0188	0.0184	0.0484	0.0444
0.03	0.004	0.0008	0.0028	0.002	0.0128			0.0816	0.0416	0.1668	0.5868	0.0028	0.0536	0.0372	0.018	0.0032	0.0132	0.06	0.0172	0.0108	0.0392		0.0008	0.0028	0.0288	0.0352	0.0004	0.0028	0.772	0.0236	0.0048	0.044	0.0084	0.004	0.2668	0.012	0.0028			0.0344	0.0916	1.5956	0.1428	0.0068	0.0416	0.0444	0.0128
0.0052	0.0072	0.096	0.01	0.0228	0.01			0.0032	0.1072	0.006	0.0416	0.0316	0.0416	0.0128	0.0296	0.016	0.012	0.01	0.1404	0.0032	0.0336		0.0204	0.1176	0.0016	0.0204	0.0388	0.1176	0.0044	0.0436	0.3212	0.1224	0.0352	0.0276	0.0064	0.002	0.2568			0.0524	0.0748	0.0432	0.0112	0.0008	0.0116	0.052	0.0604
0.0104	0.0052	0.012	0.0044	0.0192	0.04			0.1776	0.2184	0.4232	0.004	0.0156	0.2128	0.0404	0.0124	0.0164	0.1384	0.0168	0.0144	0.0152	0.02		0.0468	0.0872	0.0316	0.0104	0.0508	0.0872	0.0172	0.0224	0.4156	0.012	0.008	0.1604	0.0284	0.0156	0.0612			0.0176	0.052	0.0104	0.0032	0.0104	0.0004	0.0524	0.0124
0.0128	0.2544	0.0104	0.0416	0.0192	0.0124			0.0228	0.2936	0.0092	0.064	0.0236	0.5412	0.0068	0.0128	0.0072	0.0728	0.012	0.0096	0.0124	0.0676		0.0004	0.0116	0.0316	0.0112	0.0192	0.004	0.028	0.0132	0.0152	0.03	0.0132	0.0612	0.0044	0.0132	1.7608			0.7288	0.0456	0.0132	0.57	0.0484	0.0184	0.0176	0.0136
0.0128	0.0276	0.0012	0.008	0.0096	0.012			0.0064	0.0024	0.0304	0.034	0.0344	0.0164	0.0056	0.0036	0.0072	0.014	0.0132	0.0336	0.0116	0.0064		0.0036	0.0156	0.0144	0.012	0.0128	0.0156	0.0252	0.0148	0.034	0.0528	0.0068	0.0124	0.0032	0.036	0.0284			0.0092	0.0088	0.1112	0.0524	0.0288	0.0352	0.0328	0.0092
0.044	0.0352	0.0608	0.0044	0.01	0.012			0.0044	0.0052	0.0032	0.0068	0.09	0.008	0.2624	0.0808	0.0136	0.012	0.0104	0.0004	0.0348	0.0356		0.0004	0.202	0.0004	0.0524	0.03	0.2022	0.214	0.022	8.3496	0.0128	0.0004	0.0236	0.0116	0.116	0.0468			0.0052	0.014	0.1304	0.0088	0.0112	0.0032	0.0752	0.0244
0.0416	0.0764	0.0124	0.01	0.0012	0.0136			0.5788	0.0068	0.018	0.0072	0.2068	0.0508	4.1696	0.0816	0.068	0.034	0.0204	0.0076	0.0524	0.0512		0.0144	0.1468	0.0112	0.1096	0.0188	0.1468	0.0004	0.002	0.0064	0.0404	0.004	0.0212	0.014	0.014	0.0024			0.014	0.0212	0.0684	0.02	0.0132	0.154	0.0128	0.0632
0.022	0.0004	0.01	0.0048	0.0036	0.0076			0.0056	0.0016	0.0236	0.0024	0.102	0.0016	0.3976	0.2252	0.0076	0.0224	0.0232	0.0004	0.1056	0.0112		0.2772	0.0164	0.2428	0.2688	0.1608	0.01646	0.0428	0.0004	0.0164	0.0112	0.0056	0.0696	0.0296	0.016	0.036			0.002	0.012	0.196	0.0056	0.0084	0.6612	0.02	0.0848
0.0076	0.0116	0.0112	0.0144	0.0128	0.0104			0.0524	0.0004	0.0008	0.0128	0.0036	0.0552	0.008	0.0264	0.0144	0.0268	0.0024	0.0144	0.0388	0.012		0.01	0.0064	0.002	0.0124	0.0936	0.0064	2.2624	0.0016	0.0916	0.0092	0.206	0.0148	0.0152	0.0184	0.0164			0.2292	0.1552	1.9848	0.0008	0.0024	0.608	0.0068	0.0416
0.0128	0.0032	0.0596	0.01	0.0368	0.0112			0.0088	0.1116	0.0872	0.1048	0.976	0.0168	0.158	0.0004	0.0356	0.0176	0.086	0.0116	0.0164	0.0252		0.012	0.0396	0.1044	0.0004	0.1236	0.0396	0.3012	0.072	0.8892	0.0144	0.0576	0.242	0.022	0.0108	0.0132			0.0024	0.0344	0.0008	0.0024	0.02	0.7048	0.0288	0.0232
0.0072	0.0032	0.0556	0.0024	0.01	0.0096			0.0768	0.0956	0.1568	0.0508	0.354	0.1204	0.0396	0.0196	0.0108	0.0212	0.0108	0.008	0.0032	0.0036		0.0488	0.0056	0.0064	0.018	0.15	0.0056	0.002	0.0252	0.024	0.0024	0.0044	0.0024	0.0104	0.04	0.0152			0.0356	0.002	0.0152	21.1016	0.0152	0.0136	0.0028	0.2028
0.0088	0.0188	0.0112	0.0052	0.0008	0.012			0.0124	0.8064	0.0068	0.144	0.002	0.0424	0.2304	0.288	0.0064	0.0132	0.0156	0.0052	0.0244	0.0088		0.2776	24.184	0.0008	0.1228	0.0032	0.058	0.0476	0.0196	0.0236	0.0096	0.012	0.0128	0.0152	0.0028	0.0276			0.1236	0.0008	0.0088	0.0156	0.012	0.0028	0.022	0.2968
0.0012	0.0276	0.0092	0.0096	0.0044	0.0196			0.0132	0.2068	0.002	0.004	0.0096	0.0068	0.112	0.0452	0.0012	0.036	0.0108	0.0156	0.0576	0.0252		0.0112	0.0364	0.0604	0.0192	0.0008	0.0364	0.006	0.0336	0.038	0.0288	0.0108	0.0168	0.1464	0.0016	0.0164			0.0424	0.0056	0.0044	0.0008	0.0104	0.046	0.6624	0.0716
0.0572	0.026	0.0016	0.0136	0.0132	0.0396			0.0016	0.0216	0.0208	0.0244	0.0952	0.0068	0.002	0.0028	0.166	0.0836	0.0332	0.0136	0.0028	0.0448		0.0016	0.0008	0.0528	0.0004	0.022	0.0008	0.0004	0.0016	0.0156	0.0132	0.0252	0.0068	0.0156	0.0724	0.008			0.0068	0.0088	0.0584	0.0092	0.0312	0.0024	0.0128	0.0168
0.0176	0.0184	0.0956	0.0132	0.004	0.0124			0.0132	0.0152	0.0452	0.0728	0.0284	0.006	0.0128	0.0148	0.1164	0.0132	0.0136	0.0552	0.0148	0.0076		0.0128	0.0576	0.0232	0.01	0.014	0.0576	0.0012	0.7332	0.0044	0.0144	0.01	0.0044	0.0244	0.0084	0.0192			0.0032	0.006	0.3196	1.2896	0.0328	0.0044	0.0056	0.052
0.0048	0.0196	0.0364	0.004	0.0108	0.0028			0.1892	0.0988	0.0336	0.0108	0.0008	0.02	0.0236	0.0136	0.01	0.1308	0.0284	0.0184	0.03	0.0452		0.0268	0.0244	0.0416	0.0196	0.002	0.002	0.0404	0.01	0.058	0.0104	0.026	0.084	0.0464	0.004	0.1764			0.0252	0.0036	0.4056	0.0168	0.0096	0.0036	0.0096	0.0524
0.0072	0.0428	0.008	0.0076	0.0144	0.0868			0.0108	0.0028	0.046	0.2196	0.0688	0.0004	0.0156	0.018	0.2184	0.006	0.01	0.0624	0.0156	0.0016		0.0032	0.002	0.182	0.0256	0.0104	0.0026	0.0004	0.0324	0.0324	0.0872	0.0312	0.0132	0.0172	0.176	0.0088			0.0384	0.0048	0.0072	0.0156	0.0088	0.0392	0.0124	0.0008
0.0112	0.0116	0.0104	0.0064	0.008	0.016			0.0392	0.01	0.1508	0.0168	0.0212	0.2732	0.012	0.1128	0.01	0.016	0.0176	0.0304	0.002	0.0152		0.1184	0.0128	0.0856	0.0188	0.0096	0.0128	0.0256	0.0148	0.0004	0.0328	0.022	0.0104	0.0204	0.022	0.0316			0.0044	0.01	0.166	0.0564	0.0124	0.0012	0.024	0.012
0.008	0.006	0.0048	0.022	0.0056	0.0112			0.0044	0.1088	0.0256	0.1448	0.0116	0.0008	0.0084	0.0168	0.0148	0.0328	0.0112	0.0204	0.0388	0.0012		0.0128	0.0016	0.0456	0.1632	0.0016	0.0016	0.2344	0.1736	0.0064	0.014	0.0328	0.0216	0.0168	0.0232	0.0032			0.0672	0.044	0.0008	0.0092	0.1716	0.01	0.0076	0.0148
0.0156	0.0324	0.0208	0.0004	0.0112	0.0604			0.0016	0.038	0.0304	0.1016	0.0044	0.034	0.034	0.0628	0.0132	0.0044	0.0032	0.0708	0.0228	0.0224		0.0144	0.0524	0.3908	0.0144	0.0036	0.0524	0.0432	0.0116	0.0216	0.0128	0.1616	0.0008	0.01	0.0676	0.05			0.0016	0.0092	0.0004	0.302	0.016	0.04	0.008	0.0328
0.0004	0.0228	0.0056	0.0148	0.0176	0.012			0.0004	0.0772	0.0304	0.0304	0.0436	0.0184	0.0536	0.0224	0.1964	0.0004	0.022	0.0136	0.0768	0.0052		0.0128	0.3768	0.0004	0.0348	0.0188	0.08	0.002	0.0144	0.034	0.0268	0.0032	0.0092	0.0168	0.0564	0.094			0.0124	0.0052	0.0592	0.098	0.024	0.0384	0.032	0.0112
0.004	0.024	0.0556	0.0136	0.0256	0.0152			0.0184	0.4616	0.0152	0.0388	0.0808	0.006	0.0232	0.0164	0.0276	0.0456	0.0872	0.0024	0.0232	0.1128		0.0168	0.0116	0.0052	0.0036	0.0292	0.0116	0.0824	0.0048	0.0236	0.004	0.0092	0.0332	0.002	0.012	0.002			0.0652	0.0048	0.0008	0.0604	0.0056	0.544	0.204	0.0136
0.0036	0.0252	0.0108	0.0116	0.026	0.0112			0.0088	0.0496	2.2876	0.016	0.2544	0.0116	0.0264	0.008	0.0916	0.0196	0.0152	0.2016	0.0092	0.0448		0.0676	0.0112	0.1124	0.006	0.3152	0.0112	0.0252	0.03	0.0148	0.0228	0.336	0.0064	0.0112	0.0516	0.0984			0.0032	0.03	0.0156	0.0092	0.0016	0.3352	0.0076	0.076
0.0168	0.02	0.0052	0.002	0.0268	0.008			0.0024	0.2772	0.3392	0.008	0.0096	0.1032	0.0236	0.02	0.0228	0.0108	0.0056	0.0004	0.014	0.01		0.01	0.1772	0.0304	0.0148	0.0084	0.1772	0.0004	0.0252	0.0084	0.0128	0.1072	0.0132	0.01	0.0096	0.1384			0.0084	0.0044	0.0072	0.0048	0.0224	0.026	0.0112	0.0012
0.0056	0.0096	0.0032	0.2208	0.0116	0.0128			0.0036	0.0196	0.1744	0.0116	0.0084	0.6648	0.094	0.0164	0.0228	0.0128	0.0048	0.0456	0.0072	0.0072		0.0192	0.0008	0.0104	0.1024	0.0088	0.0008	0.104	0.0044	0.0376	0.0196	0.0208	0.0112	0.01	0.0156	0.0004			0.1672	0.0256	0.0268	0.008	0.1472	0.0904	0.1644	0.0156
0.0116	0.0376	0.0144	0.0104	0.0088	0.0268			0.0344	0.0212	0.0592	0.0128	0.632	0.0072	0.0212	0.2852	0.0276	0.0004	0.0128	0.0256	0.0056	0.0144		0.0292	0.0572	0.0552	0.0024	0.078	0.0572	0.1296	0.0076	0.0196	0.0304	0.0276	0.0136	0.0412	0.0124	0.0108			0.1064	0.0436	0.0104	0.0148	0.0056	0.2392	0.066	0.0424
0.0232	0.0012	0.014	0.0068	0.0008	0.014			0.1868	0.0708	0.006	0.0124	0.0352	0.0576	0.0324	0.0284	0.0128	0.0124	0.0308	0.0228	0.0076	0.0108		0.0208	0.0208	0.0644	0.0032	0.4048	0.0208	0.0028	0.0088	0.0856	0.0048	0.01	0.0164	0.0096	0.0128	0.0624			0.1948	0.0788	0.0276	0.0092	0.3276	0.0196	0.0328	0.0508
0.0028	0.0112	0.004	0.0084	0.0028	0.0088			0.1068	0.0244	0.0308	0.0108	0.0076	0.024	0.0296	0.0248	0.0088	0.0096	0.0232	0.0176	0.01	0.0112		0.0008	0.008	0.022	0.016	0.0292	0.008	0.028	0.0112	0.0508	0.01	0.0504	0.02	0.002	0.0004	0.0004			0.0192	0.1396	0.0004	0.0152	0.016	0.0196	0.0116	0.0268
0.0112	0.0144	0.01	0.01	0.002	0.0212			0.0028	0.0008	0.0088	0.0064	0.0856	0.1308	0.0164	0.018	0.0092	0.028	0.0188	0.0004	0.3216	0.0112		0.0184	0.1584	0.0596	0.0292	0.0356	0.1584	0.0036	0.0088	0.6412	0.0704	0.0968	0.012	0.03	0.0872	0.0196			0.0124	0.0228	0.0048	0.0008	0.004	0.0468	0.0016	0.098
0.0216	0.0284	0.0008	0.0092	0.0284	0.0012			0.0312	0.0268	0.0048	0.024	0.0096	0.038	1.0044	0.006	0.0216	0.0012	0.062	0.0436	0.234	0.0428		0.0356	0.0824	0.0136	0.0004	0.0868	0.0824	0.0112	0.0096	13.6136	0.0108	0.7848	0.01	0.012	0.0212	0.0028			0.022	0.018	0.05	0.0076	0.0088	0.0832	0.0964	0.012
0.0004	0.004	0.0588	0.0268	0.1324	0.0092			0.118	0.3196	0.0344	0.0308	0.0212	0.0144	0.0148	0.0016	0.0428	0.002	0.0356	0.0012	0.012	0.0108		0.012	0.0112	0.0264	0.0568	0.0004	0.0112	0.0072	0.0048	0.01	0.016	0.0112	0.018	0.014	0.018	0.0288			0.0032	0.0012	0.0032	0.0032	0.0016	0.034	0.0216	0.0372
0.0128	0.0436	0.0764	0.0204	0.07	0.01			0.008	0.0196	0.0776	0.01	0.002	0.216	1.1712	0.0124	0.0072	0.0172	0.014	0.15	0.0224	0.0108		0.0612	0.0068	1.3728	0.028	0.0124	0.0068	0.0112	0.0856	0.0128	0.0132	0.0112	0.0048	0.012	0.0172	0.0252			0.004	0.0032	0.5056	0.084	0.002	0.0184	0.0252	0.0316
0.0016	0.0252	0.1068	0.006	0.018	0.012			0.0124	0.0796	0.0284	0.0316	0.0096	0.058	0.0128	0.2456	0.024	0.0584	0.014	0.0404	0.0476	0.0164		0.0152	0.3024	0.0944	0.0092	0.0088	0.218	0.0148	0.0332	0.9956	0.0124	0.012	0.092	0.0024	0.0784	0.1044			0.0124	0.0216	0.0052	0.0296	0.006	0.0468	0.0732	0.0284
0.0356	0.0036	0.0484	0.01	0.6656	0.012			0.004	0.0504	0.0004	4.5384	0.0584	0.0444	0.0036	0.012	0.0076	0.0092	0.0096	0.1036	0.0056	0.0116		0.0032	0.0088	0.006	0.0228	0.0036	0.0088	0.2976	0.0176	0.0816	0.0136	0.0144	0.0112	0.0468	0.0232	0.012			0.132	0.0492	0.0668	0.002	0.016	0.0084	0.0288	0.0104
0.0048	0.008	0.0016	0.0124	0.1976	0.0016			0.0056	0.0412	0.2548	0.0156	0.016	0.046	0.0236	0.0124	0.0584	0.002	0.012	0.01	0.0084	0.0004		0.0328	0.0584	0.0172	0.0908	0.0004	0.048	0.0232	0.0056	0.0072	0.278	0.0004	0.0248	0.0028	0.0308	0.0128			0.0392	0.0296	0.0536	0.0044	0.0152	0.0008	0.0684	0.0588
0.0032	0.0288	0.1572	0.012	0.0308	0.0156			0.0564	0.0104	0.0244	0.0772	0.0028	0.1576	0.2164	0.0088	0.0056	0.0116	0.0272	0.0072	0.1316	0.0116		0.038	0.0184	0.2024	0.0012	0.0264	0.0184	0.0868	0.0412	0.0756	0.0116	0.0044	0.0044	0.0096	0.258	0.0696			0.002	0.0132	0.2148	0.102	0.0096	0.0332	0.0128	0.262
0.0168	0.0108	0.0344	0.0092	0.0024	0.0124			0.0656	0.0144	0.1668	0.0192	0.0124	0.0104	0.0264	0.0132	0.0132	0.0168	0.0076	0.006	0.1404	0.0136		0.012	0.0136	0.266	0.0188	0.0216	0.0136	0.0064	0.102	0.0024	0.0192	0.012	0.024	0.0072	0.0096	0.2444			0.0868	0.0304	0.0348	0.058	0.0012	0.2248	0.0152	0.118
0.0188	0.116	0.1016	0.1804	0.0036	0.0192			0.008	0.0008	0.0272	0.0792	0.0716	0.1024	0.0372	0.002	0.0092	0.0096	0.0148	0.0128	0.0028	0.012		0.1232	0.0024	0.0236	0.0132	0.0248	0.0024	0.2784	0.0076	0.024	0.0136	0.0616	0.0104	0.082	0.0132	0.026			0.1112	0.006	0.0224	0.0116	0.0372	0.0304	0.5744	0.0008
0.0124	0.0108	0.002	0.056	0.012	0.0128			0.014	0.0504	0.0296	0.0396	0.984	0.0096	0.0064	0.002	0.0196	0.0104	0.058	0.0664	0.0316	0.016		0.3636	0.0128	0.5108	0.2736	0.0544	0.026	0.0004	0.0064	0.0152	0.0108	0.0044	0.0372	0.0276	0.0212	0.0152			0.1268	0.0368	0.0268	0.01	0.0132	0.0612	0.0008	0.018
0.2832	0.01	0.008	0.022	0.01	0.0384			0.0244	0.0916	0.0088	1.0148	0.0104	0.0216	0.01	0.292	0.0044	0.0108	0.006	0.0096	0.0124	0.0104		0.0128	0.0068	0.0088	0.0224	0.0008	0.0068	0.0328	0.0176	0.0104	0.0124	0.0136	0.0128	0.0432	0.0096	0.0028			0.0088	0.0944	0.0296	0.168	0.0684	0.318	0.0124	0.0128
0.0044	0.0172	0.0108	0.0156	0.0136	0.0232			0.0224	0.0008	0.2772	0.0008	0.002	0.0108	0.012	0.0064	0.038	0.0136	0.0096	0.0192	0.0356	0.0032		0.0112	0.3996	0.0112	0.0704	0.262	0.3996	0.0088	0.0124	0.0096	0.0044	0.0132	0.0076	0.0108	0.0268	0.0124			0.0612	0.0128	0.0388	0.402	0.0104	0.014	0.0024	0.0196
0.0464	0.024	0.0068	0.0364	0.0092	0.0036			0.1024	0.012	0.0672	0.0012	0.052	0.006	0.066	0.016	0.0252	0.0092	0.0128	0.0168	0.0008	0.0172		0.0152	0.0008	0.006	0.0184	0.0684	0.0008	0.02	0.0132	0.014	0.0416	0.0212	0.0004	0.0196	0.2292	0.002			0.0044	0.448	0.0356	0.0212	0.012	0.02	0.006	0.0196
0.0268	0.1128	0.0724	0.0008	0.0236	0.01			0.0008	0.1788	0.0652	0.0148	0.0048	0.0112	0.2052	0.0672	0.0176	0.0124	0.0008	0.016	0.1124	0.0076		0.0084	0.3316	1.3636	0.0156	0.4036	0.006	0.1388	0.3112	0.0212	0.0152	0.2012	0.0172	0.0888	0.0144	0.0996			0.2332	0.0092	0.0064	0.0628	0.108	0.03	0.0008	0.0292
0.0272	0.048	0.17	0.0128	0.0072	0.4436			0.2012	0.0068	0.002	0.01	0.0068	0.1804	0.2532	0.0184	0.0032	0.0048	0.0164	0.014	0.014	0.0128		0.0468	0.002	0.0068	0.0024	0.0044	0.0022	0.002	0.05	0.0252	0.0108	0.052	0.0116	0.0128	0.0084	0.0812			0.104	0.05	0.0012	0.7796	0.0044	0.1316	1.4532	0.0208
0.0164	0.0128	0.004	0.0092	0.0332	0.0128			0.0168	0.3584	0.0008	0.0856	0.0204	0.0248	0.0164	0.0148	0.0112	0.0324	0.0112	0.2328	0.1376	0.0024		0.0092	0.1476	0.008	0.0116	0.0064	0.1476	0.0004	0.0116	0.0868	0.0456	0.0096	0.044	0.0064	0.004	0.004			0.012	0.0056	0.012	0.044	0.0092	0.018	0.0616	0.0232
0.0396	0.0672	0.0164	0.0088	0.0004	0.014			0.0164	0.3752	0.056	0.0012	0.0008	0.0976	0.0392	0.0016	0.0128	0.0152	0.006	0.1188	0.07	0.0208		0.018	0.0144	0.01	0.1696	0.0044	0.0144	0.0168	0.1292	1.5696	0.014	0.0292	0.0368	0.0148	0.0124	0.0008			0.0072	0.0348	0.0764	0.1168	0.004	0.2344	0.0152	0.0064
0.014	0.0236	0.0172	0.0068	0.0104	0.0272			0.0744	0.014	0.0116	0.1044	0.0184	0.008	0.1032	0.01	0.0008	0.0224	0.01	0.0104	0.0084	0.0148		0.016	0.0196	0.0232	0.0516	0.0488	0.0196	0.0236	0.0108	0.0008	0.0116	0.0304	0.0056	0.0124	0.0016	0.0172			0.0056	0.0372	0.0904	0.1216	0.0048	0.076	0.0048	0.0208
0.002	0.0172	0.0028	0.012	0.0232	0.0184			0.0224	0.0032	0.0152	0.042	0.3144	0.126	0.012	0.0284	0.0876	0.0212	0.0268	0.1496	0.1616	0.018		0.6888	0.0188	0.0148	0.0464	0.364	0.0188	0.0724	0.0624	0.01	0.0064	0.2244	0.0148	0.0036	0.0568	0.0004			0.0876	0.2036	0.0012	0.0048	0.1172	0.0756	0.1304	0.0128
0.0076	0.3108	0.0136	0.008	0.0112	0.0232			0.028	0.7232	0.0236	0.0028	0.0428	0.324	0.0092	0.0188	0.0704	0.0192	0.0128	0.0212	0.0156	0.0212		0.0012	0.2444	0.648	0.0028	0.014	0.046	0.0464	0.0056	0.0004	0.006	0.0128	0.0556	0.0328	0.0124	0.0568			0.2968	0.0336	0.0128	0.0012	0.1	0.0256	0.1052	0.01
0.0184	0.0124	0.0112	0.0084	0.0144	0.038			0.208	0.0872	0.0116	0.2756	0.0228	0.0488	0.0124	0.038	0.0084	0.0116	0.0592	0.0076	0.024	0.012		0.0272	0.0112	0.0032	0.2632	0.0028	0.0112	0.0036	0.008	0.002	0.01	0.024	0.0112	0.0024	0.0124	0.0008			0.004	0.0028	0.0408	0.1448	0.004	0.0032	0.0024	0.1192
0.022	0.0124	0.028	0.01	0.024	0.0124			0.0224	0.0088	0.0236	0.0052	0.0044	0.0208	1.5732	0.0164	0.056	0.0124	0.006	0.1064	0.0008	0.086		0.0204	0.0112	0.0988	0.0176	0.0004	0.0112	0.1304	0.084	0.022	0.0136	0.0016	0.016	0.0064	0.0104	0.352			0.0128	0.0004	0.0344	0.0016	0.016	0.0008	0.0124	0.016
0.0552	0.006	0.0572	0.0112	0.0108	0.088			0.0012	0.0116	0.0052	0.0728	0.0052	0.0308	0.0136	0.3244	0.0124	0.0144	0.0116	0.0168	0.018	0.0212		0.006	0.0012	0.1488	0.0704	0.316	0.0012	0.0036	0.0132	0.1588	0.014	0.0268	0.0664	0.0176	0.0004	0.0084			0.0568	0.0008	0.732	0.0024	0.2256	0.8144	0.022	0.7228
0.0004	0.0252	0.0304	0.0128	0.0116	0.0996			0.0052	0.248	0.0176	0.0308	0.0268	0.02	0.0132	0.0108	0.0668	0.0892	0.01	0.002	0.0496	0.0056		0.0284	0.0128	0.0168	0.0004	0.0064	0.008	0.0608	0.0112	0.0132	0.0156	0.024	0.012	0.0312	0.0208	0.0112			0.0488	0.0888	0.5568	0.04	0.0276	0.2612	0.0056	0.032
0.1568	0.1728	0.0672	0.0136	0.0512	0.0088			0.0072	0.2988	0.008	0.0768	0.0028	0.0072	0.0552	0.0128	0.0116	0.0128	0.0232	0.0092	0.118	0.014		0.04	0.0148	0.0032	0.01	0.0752	0.0148	0.042	0.0016	0.0188	0.036	0.048	0.014	0.0156	0.054	0.0312			0.1504	0.022	0.2572	0.0052	3.4096	0.0176	0.0964	0.0128
0.0952	0.0252	0.0176	0.008	0.0296	0.0124			0.02	1.618	0.022	0.01	0.0824	0.0008	0.334	0.0944	0.0104	0.0132	0.0068	0.0172	0.054	0.0112		0.0192	0.1272	0.0164	0.0012	0.0284	0.538	0.0336	0.0196	0.0088	0.0404	0.008	0.01	0.0096	0.016	0.0088			0.0088	1.9524	0.1092	0.2788	0.0116	0.1104	0.0028	0.0132
0.0092	0.0004	0.0092	0.0156	0.0796	0.01			0.1016	0.6528	0.0752	0.012	0.0104	0.1096	0.4	0.026	0.01	0.0024	0.0088	0.2992	0.0072	0.1136		0.0208	0.0032	0.002	0.2856	0.2892	0.0032	0.0332	35.4464	0.032	0.0068	0.0272	0.0156	0.0092	0.006	0.0004			0.0176	0.0308	0.0188	0.0364	0.0068	0.3452	0.0396	0.056
0.0224	0.0232	0.056	0.032	0.006	0.0132			0.0108	0.0204	0.0124	0.0028	0.076	0.0584	0.0172	0.0172	0.0232	0.0272	0.0232	0.0168	0.0096	0.0136		0.018	0.3404	0.008	0.12	0.0372	0.3404	0.0028	0.5316	0.01	0.012	0.0208	0.0084	0.0296	0.0192	0.0288			0.0124	0.0732	0.074	0.0204	0.0112	0.0192	0.0176	0.0864
0.0488	0.004	0.1572	0.0116	0.0012	0.002			0.0144	1.5336	0.0528	0.03	0.0276	0.0012	0.0136	0.0008	0.0128	0.016	0.0344	0.0344	0.0096	0.0192		0.0144	0.118	0.0304	0.0044	0.0464	0.1184	0.1416	0.022	0.0148	0.0052	0.0516	0.0116	0.0104	0.0808	0.014			0.0068	0.0296	0.0824	0.0332	0.0348	0.0028	0.1544	0.0136
0.0388	0.0108	0.004	0.0136	0.0544	0.1544			0.0084	0.0076	0.0644	0.0472	0.056	0.1016	0.0108	0.2088	0.0256	0.012	0.0136	0.0068	0.0032	0.1656		0.0044	0.0192	0.01	0.0572	0.0004	0.026	0.0916	0.1016	0.0144	0.0104	0.0032	0.0012	0.1508	0.0028	0.0044			0.0044	0.0088	0.0004	0.0116	0.0256	0.0216	0.0116	0.0104
0.0012	0.0136	0.0096	0.0504	0.0036	0.0024			0.518	0.0112	0.0096	0.0044	0.0212	0.0036	0.2596	0.02	0.0156	0.0128	0.0056	0.0404	0.0004	0.0092		0.0048	0.0996	0.0244	0.0152	0.0068	0.0996	0.3124	0.0404	0.0012	0.0116	0.0168	0.0072	0.06	0.0068	0.0024			0.0288	0.0004	0.7212	0.026	0.002	0.0844	0.0116	0.0556
0.0112	0.0036	0.6132	0.0068	0.0972	0.0152			0.2732	0.016	0.0088	0.028	0.0328	0.0028	0.0124	0.0896	0.0188	0.062	0.0132	0.01	0.0032	0.1356		0.0168	0.0024	0.0188	0.0088	0.2164	0.0024	0.0004	0.1152	0.014	0.04	0.0136	0.0088	0.016	0.0308	0.0112			0.0128	0.0236	3.4752	0.0096	0.0712	0.19	0.6224	0.0232
0.0192	0.0336	0.0112	0.0208	0.0096	0.0136			0.0004	0.0636	0.0016	0.002	0.0144	0.0684	0.0004	0.01	0.0284	0.0152	0.0176	0.0124	0.1976	0.0244		0.0136	0.0912	0.0928	0.234	0.4304	0.0912	0.0732	0.0236	0.0752	0.018	0.0048	0.0124	0.0196	0.012	0.0536			0.0288	0.3544	0.0004	0.034	0.038	0.0092	0.0088	0.0356
0.0004	0.0116	0.0016	0.01	0.0848	0.01			0.0052	0.0124	0.0312	0.2384	0.0072	0.0408	0.1812	0.0124	0.004	0.01	0.0168	0.0624	0.0008	0.0004		0.0128	0.0364	0.018	0.06	0.0648	0.0364	0.0168	0.0424	0.0132	0.0112	0.0132	0.0364	0.006	0.0872	0.0032			0.0052	0.0052	0.0448	0.0004	0.0116	0.0084	0.002	0.0132
0.0092	0.0048	0.0064	0.0516	0.0016	0.0096			0.1204	0.1028	0.0064	0.002	0.0048	0.0636	0.0032	0.0596	0.02	0.0112	0.0128	0.0192	0.0048	0.0284		0.01	0.0188	0.0924	0.2432	0.1288	0.006	0.0012	0.0156	0.0128	0.004	0.154	0.0116	0.0128	0.0072	0.0048			0.0156	0.1632	0.0236	0.1636	0.0168	0.0628	0.0264	0.0524
0.1688	0.002	0.0152	0.0656	0.0504	0.0112			0.1668	0.0136	0.0228	0.006	0.0168	0.002	0.0868	0.0332	0.0152	0.0172	0.0152	0.0308	0.0924	0.0132		0.0532	0.0004	0.0184	0.0068	0.002	0.006	0.0052	0.202	0.0084	0.0188	0.0044	0.0172	0.0164	0.0048	0.1144			0.1088	0.0032	0.02	0.0136	0.146	0.0052	0.0216	0.01
0.0152	0.0492	0.0996	0.0124	0.0276	0.0192			0.0796	0.0028	0.028	0.0112	0.022	0.06	0.0252	1.4036	0.0016	0.0772	0.01	0.0208	0.508	0.0112		0.0204	0.208	0.0036	0.76	0.0032	0.2088	0.1188	0.0084	0.1824	0.0124	0.0128	0.0408	0.0128	0.0432	0.0216			0.002	0.1924	0.0104	1.1288	0.014	0.004	0.0316	0.0212
0.5292	0.0228	0.076	0.0164	0.0316	0.0144			0.0772	0.03	0.0096	0.0884	0.004	1.0324	0.0188	0.0276	0.0108	0.0252	0.0244	0.0104	0.0304	0.04		0.0112	0.0684	0.0132	0.0396	0.01	0.0684	1.3308	0.0132	0.4536	0.024	0.0428	0.0144	0.0012	0.0436	0.018			0.4244	0.0092	0.0172	0.0536	0.6472	0.0112	0.0004	0.016
0.0008	0.0156	0.0196	0.0272	0.012	0.0572			0.0024	0.0004	0.0124	0.0048	0.0216	0.0352	0.0304	0.006	0.0208	0.0488	0.0136	0.0056	0.0108	0.002		0.0212	0.3736	0.006	0.0608	0.0292	0.3736	0.0404	0.044	0.0168	0.01	0.0088	0.0008	0.016	0.0232	0.0008			0.0692	0.0944	0.0176	0.02	0.0292	0.0196	0.01	0.0176
0.0004	0.0176	0.01	0.014	0.0132	0.022			0.0036	0.0256	0.0028	0.0396	0.0152	0.0096	0.0012	0.012	0.0176	0.024	0.004	0.0312	0.0028	0.0304		0.0128	0.0004	0.0004	0.0396	0.6644	0.0004	0.1568	0.0064	0.0116	0.03	0.0052	0.016	0.0232	0.0316	0.0048			0.0776	0.022	0.3512	0.03	0.056	0.0664	0.0236	0.012
0.0704	0.0056	0.0096	0.0016	0.176	0.0072			0.0088	0.01	0.036	0.0092	0.0104	0.0308	0.0032	0.012	0.0068	0.0092	0.0156	0.0148	0.0096	0.026		0.0292	0.0336	0.0336	0.0112	0.0548	0.0336	0.1812	0.02	0.0152	0.0096	0.0644	0.0108	0.0128	0.0136	0.0096			0.0008	0.052	0.0072	0.0196	0.022	0.4228	0.0076	0.0296
0.0012	0.1148	0.0108	0.01	0.0236	0.0096			0.0044	0.0128	0.002	0.0036	0.0032	0.008	0.0012	0.0536	0.0136	0.0252	0.008	0.0096	0.0444	0.0308		0.004	0.0008	0.0232	0.0164	0.0056	0.0008	0.0684	0.02	0.0212	0.018	0.0156	0.0112	0.012	0.0308	0.0112			0.0272	0.008	1.072	0.0056	0.0504	0.004	0.0012	0.0312
0.0772	0.0704	0.0576	0.0084	0.0824	0.0452			0.0136	0.0096	0.0864	0.0156	0.0024	0.0632	0.0124	0.02	0.0112	0.0148	0.0136	0.004	0.0024	0.0424		0.0268	0.074	0.0152	0.0016	0.0144	0.0746	0.0288	0.0052	0.0044	0.0172	0.012	0.018	0.0124	0.014	0.0032			0.0692	0.1156	0.0044	0.0372	0.166	0.3484	0.0032	0.0068
0.0212	0.0004	0.1596	0.0272	0.0012	0.0656			0.1768	0.208	0.0692	0.0564	0.0244	0.0168	0.0184	0.0052	0.01	0.0132	0.0092	0.0276	0.0124	0.0328		0.0328	0.0392	0.3152	0.0384	0.2112	0.0392	0.0016	0.0024	0.0816	0.014	0.016	0.5188	0.0348	0.0288	1.0512			0.0948	0.0852	0.0176	0.0352	0.0148	0.0348	0.0288	0.0112
0.0104	0.0572	0.0152	0.0184	0.0112	0.0148			0.0688	0.0636	0.0184	0.3848	0.0036	0.0108	0.0176	0.0036	0.0048	0.0112	0.0472	0.0188	0.0016	0.0128		0.0032	0.1996	0.0276	0.0096	0.0188	0.1996	0.1064	0.1872	0.1236	0.01	0.0052	0.0068	0.0036	0.0156	0.008			0.0712	0.008	0.0488	0.2308	0.0152	0.0164	0.024	0.0636
0.0016	0.0128	0.0092	0.0032	0.0316	0.0056			0.0088	0.766	0.006	0.02	0.01	0.0264	0.1804	0.0048	0.0132	0.0064	0.012	0.0292	0.0164	0.01		0.0012	0.0128	0.006	0.0052	0.0256	0.0128	0.0176	0.0384	0.0132	0.0108	0.06	0.0136	0.012	0.0128	0.0016			0.0028	0.1372	0.3752	0.0048	0.1084	0.0496	0.0056	0.0268
0.046	0.0108	0.0116	0.0112	0.0416	0.0084			0.036	0.046	0.0292	0.0004	0.0376	0.008	0.0088	0.0248	0.008	0.0084	0.002	0.0012	0.0388	0.008		0.0316	0.0356	0.0044	0.018	0.0028	0.0356	0.0048	0.02	0.0064	0.0888	0.0072	0.0208	0.1084	0.0192	0.0092			0.0024	0.0016	0.002	1.634	0.0108	0.0288	0.0212	0.0048
0.0128	0.0904	0.0184	0.0144	0.0156	0.0984			0.8076	0.0028	0.0004	0.162	0.0028	0.3848	0.0656	0.0044	0.0268	0.0208	0.0548	0.0176	0.0572	0.0124		0.012	0.01	0.0044	0.0292	0.4192	0.0136	0.958	0.0052	0.0016	0.0056	0.0088	0.0588	0.0528	0.008	0.0164			0.5	0.2404	1.09	0.02	0.0052	0.0004	0.0132	0.014
0.0336	0.01	0.004	0.0132	0.0112	0.0004			0.002	0.0212	0.142	0.0692	0.0016	0.1248	0.0108	0.008	0.0152	0.0496	0.012	0.034	0.04	0.0164		0.036	0.06	0.0084	0.0072	0.0496	0.0644	0.0192	0.0308	0.0176	0.01	0.0112	0.0136	0.014	0.0156	0.3204			0.246	0.03	0.0252	0.0056	0.0144	0.0056	0.0176	0.01
0.0056	0.034	0.0504	0.018	0.0236	0.0328			0.0272	0.1284	0.042	0.4592	0.0176	0.3688	0.034	0.0072	0.036	0.0124	0.0004	0.0116	0.0336	0.0124		0.0544	0.0068	0.2056	0.0136	0.0148	0.0068	0.0312	0.0928	0.0304	0.0108	0.026	0.014	0.0232	0.0128	0.1448			0.0412	0.0024	0.0428	0.0372	0.0196	0.0524	0.0404	0.026
0.0012	0.0008	0.004	0.0292	0.0004	0.0004			0.04	0.0156	0.012	0.0048	0.0028	0.022	0.0176	0.0152	0.0464	0.0128	0.0008	0.0176	0.0024	0.016		0.0444	0.3496	0.0128	0.0016	0.3792	0.182	0.084	0.0772	0.0216	0.0108	0.0296	0.0164	0.0076	0.0308	0.006			1.3732	0.0024	0.4664	0.0624	0.0108	0.024	0.0312	0.0996
0.0004	0.0024	0.0668	0.0252	0.0272	0.0112			0.2096	0.074	0.0068	0.022	0.0232	0.4372	0.0012	0.0172	0.0044	0.006	0.0044	0.0272	0.0052	0.0012		0.0048	0.0652	0.01	0.002	0.0192	0.0652	0.04	0.0148	0.0552	0.3912	0.022	0.0104	0.0264	0.0148	0.0032			0.228	0.0128	0.0344	0.0272	0.006	0.0104	0.006	0.0168
0.0112	0.0064	0.0944	0.006	0.0376	0.0052			0.0104	0.006	0.0392	0.0528	0.0268	0.0228	0.002	0.036	0.8824	0.012	0.06	0.3872	0.4316	0.008		0.018	0.0772	0.0216	0.4088	0.0012	0.0772	0.0104	0.0484	0.2	0.0168	0.018	0.0132	0.0064	0.0224	0.004			0.034	0.068	0.0692	0.0012	0.0056	0.0712	0.0728	0.0064
0.0244	0.0252	0.0068	0.0096	0.0792	0.0124			0.008	0.002	0.0336	0.0172	0.048	0.3304	0.002	0.6532	0.074	0.01	0.008	0.002	0.0044	0.022		0.014	0.0032	0.0884	0.7044	0.1064	0.0032	0.102	0.0036	0.022	0.0176	0.0064	0.01	0.23	0.0208	0.0348			0.008	0.0204	0.0024	0.0008	0.0124	0.0012	0.0276	0.03
0.0284	0.0076	0.0212	0.008	0.0076	0.01			0.2052	0.546	0.0008	0.0056	0.0488	0.044	0.0932	0.0196	0.0152	0.038	0.0124	0.004	0.0236	0.0932		0.004	0.0156	0.0048	0.0164	0.0432	0.0156	9.91	0.0692	0.0064	0.0284	0.0112	0.0128	0.0088	0.0304	0.0152			0.1372	0.124	0.0108	0.0156	0.0156	0.2604	0.0088	0.0744
0.0216	0.0188	0.0124	0.0016	0.0612	0.0124			0.9504	0.0032	0.0176	0.0032	0.0144	0.0088	0.1276	0.01	0.012	0.0148	0.0136	0.0212	0.0076	0.2272		0.0116	0.1308	0.002	0.0348	0.0336	0.1308	0.0044	0.0136	0.072	0.0472	0.0068	0.01	0.0016	0.0272	0.088			0.0728	0.0364	0.0268	0.1656	0.0556	0.0028	0.32	0.0208
0.0996	0.0076	0.01	0.0048	0.058	0.116			0.0004	0.092	0.0004	0.4476	0.0136	0.0412	0.0168	0.0512	0.0296	0.008	0.0192	0.0024	0.0192	0.014		0.0088	2.6412	0.046	0.0588	0.0372	2.6412	0.0348	0.0004	0.0208	0.0104	0.0396	0.01	0.004	0.0176	0.0008			0.1492	0.0732	0.6028	0.026	0.0136	0.026	0.0764	0.0232
0.022	0.014	0.0096	0.0172	0.0164	0.0212			0.0268	0.0048	0.1388	0.0032	0.0612	0.0504	0.028	0.0028	0.0032	0.0124	0.0096	0.0012	0.0136	0.0128		2.422	0.0024	0.0888	0.0204	0.0812	0.0024	0.1364	0.3272	0.0128	0.0068	0.0136	0.0096	0.0232	0.0116	0.0072			0.0036	0.0552	0.1992	0.0644	0.0176	0.0084	0.006	0.012
0.0084	0.0004	0.0128	0.0332	0.0852	0.0132			0.0004	0.0172	0.2928	0.0308	0.004	0.01	0.2016	0.0028	0.0036	0.0604	0.0036	0.0136	0.0288	0.0216		0.0048	0.0088	0.0016	0.0452	0.378	0.0088	0.0184	0.0428	0.0172	0.01	0.006	0.0084	0.0112	0.0988	0.0252			0.0692	0.0056	0.0472	0.1748	0.0568	0.0312	0.2904	0.0124
0.0104	0.0088	0.0104	0.0424	0.012	0.0096			0.0024	1.7572	0.0144	0.0144	0.0104	0.0108	0.0156	0.0276	0.0212	0.014	0.022	0.0128	0.0224	0.0124		0.0104	0.1124	0.0132	0.0344	0.004	0.06	0.0548	0.0036	0.0104	0.018	0.0384	0.0132	0.0112	0.0144	0.0148			0.0188	0.0204	0.204	0.0024	0.0156	0.0664	0.0052	0.0352
0.002	0.0856	0.008	0.0156	0.01	0.0128			0.042	0.0336	0.0112	0.0092	0.1144	0.0704	0.0352	0.0364	0.0144	0.0036	0.0044	0.0376	0.1668	0.0212		0.014	0.0032	0.0276	0.0052	0.1268	0.0032	0.0256	0.0008	0.0076	0.0248	0.054	0.0084	0.0112	0.0296	0.0456			0.0204	0.0128	0.0024	0.8388	0.0104	0.0552	0.0008	0.018
0.0112	0.0124	0.0112	0.068	0.0248	0.0084			0.0696	0.008	0.0112	0.0072	0.1148	0.016	0.006	0.01	0.0248	0.0384	0.006	0.094	0.0048	0.01		0.0124	0.0108	0.0684	0.0008	2.288	0.0108	0.032	0.1636	0.0216	0.0124	0.0068	0.012	0.002	0.0096	0.0324			0.0304	0.022	0.002	0.0372	0.2192	0.0032	0.0048	0.0124
0.0012	0.0196	0.0356	0.0076	0.1036	0.014			0.0016	0.058	1.0564	0.0036	0.0016	0.0032	0.0016	0.0104	0.004	0.0228	0.0152	0.0132	0.0292	0.0132		0.0148	0.3836	0.0016	0.0388	0.0004	0.03	0.3664	0.0236	0.018	0.0092	0.0096	0.9048	0.0164	0.0248	0.0048			0.0312	0.0468	0.6028	0.06	0.0168	0.002	0.0024	0.0144
0.008	0.0024	0.0096	0.0004	0.0072	0.0104			0.004	0.048	0.002	0.0088	0.0672	0.0156	0.0036	0.0152	0.004	0.0004	0.0096	0.002	0.0084	0.0224		0.0496	0.022	0.0184	0.0008	0.004	0.0222	0.5196	0.0004	0.0188	0.012	0.0152	0.0132	0.0124	0.0128	0.072			0.2724	0.0312	0.0192	0.0516	0.1544	0.07	0.0536	0.06
0.0036	0.026	0.072	0.0044	0.0008	0.0124			0.0204	0.0076	0.0664	0.0168	0.0596	1.1196	0.022	0.0124	0.0032	0.0016	0.01	0.0532	0.0244	0.0304		0.0268	0.0024	0.0096	0.0016	0.0732	0.014	0.4384	0.0992	0.0508	0.0196	0.0264	0.0016	0.0072	0.0012	0.0244			0.032	0.7096	0.0012	0.1716	0.0104	0.01	0.0124	0.01
0.0124	0.018	0.2644	0.0188	0.0128	0.0876			0.3872	0.0664	0.1092	0.0256	0.0156	0.0156	0.0076	0.0336	0.0532	0.006	0.0044	0.1776	0.2052	0.0132		0.0036	0.0004	0.0008	0.092	0.0348	0.0004	0.032	0.0088	0.0228	0.0212	0.1004	0.0252	0.0336	0.0324	0.0184			0.2632	0.0028	0.2596	0.0036	0.0052	0.504	0.0132	0.0192
0.0084	0.0052	0.0148	0.0032	0.0128	0.0212			0.0308	0.2992	0.0888	0.0004	0.034	0.0024	0.018	0.0336	0.0252	0.0088	0.01	0.0072	0.0124	0.0132		0.0176	0.0228	0.0976	0.0172	0.0164	0.0228	0.936	0.0168	0.116	0.0128	0.0276	0.0096	0.0028	0.0104	0.0364			0.0444	0.0172	0.0608	0.032	0.0156	0.0244	0.006	0.0328
0.0524	0.0056	0.0104	0.0124	0.008	0.01			0.0012	0.0848	0.0156	0.0072	0.094	0.0204	0.0104	0.0192	0.012	0.0672	0.0484	0.0156	0.0152	0.0348		0.0052	0.0032	0.0056	0.0328	0.0012	0.0032	0.002	0.0092	0.018	0.0408	0.0032	0.1856	0.0068	0.0124	0.0032			0.0064	0.028	0.0064	0.0188	0.0004	0.0544	0.0136	0.0136
0.0288	0.1932	0.004	0.0144	0.0044	0.01			0.018	0.0048	0.0036	0.19	0.0036	0.0056	0.0156	0.0044	0.0904	0.0536	0.01	0.024	0.2508	0.004		0.0124	0.02	0.0004	0.002	0.006	0.0252	0.0344	0.0388	0.0104	0.0112	0.0296	0.0092	0.0204	0.1796	0.048			0.0516	0.0092	2.5788	0.0352	0.0804	0.0008	0.0168	0.0028
0.0124	0.004	0.0528	0.0256	0.0248	0.0116			0.0072	0.1072	0.042	0.0112	0.0204	0.0184	0.0068	0.0316	0.0104	0.0076	0.0176	0.0128	0.014	0.0084		0.012	0.1096	0.018	0.0264	0.0032	0.1096	0.0012	0.0252	0.048	0.0004	0.0184	0.0104	0.0144	0.0044	0.0208			0.034	0.0012	0.004	0.2344	0.0108	0.0184	0.03	0.0076
0.0388	0.0076	0.0164	0.0216	0.0108	0.0112			0.0584	0.0888	0.0316	0.0308	0.0008	0.0072	0.0216	0.014	0.0124	0.0048	0.008	0.0132	0.0076	0.0656		0.114	0.0276	0.0312	0.2348	0.092	0.0276	0.0272	0.0124	0.0132	0.0128	0.124	0.0096	0.006	0.0476	0.006			0.1348	0.1388	0.006	0.0004	0.002	0.0144	0.4372	0.0416
0.1032	0.0048	0.0416	0.0012	0.0556	0.0188			0.3448	0.1452	0.0548	0.0188	0.0104	0.3712	0.0116	0.0968	0.008	0.0072	0.0128	0.0072	0.0032	0.0304		0.0384	0.228	0.0008	0.0096	0.0168	0.2282	0.0004	0.0056	0.006	0.212	0.0164	0.012	0.0184	0.0164	0.0028			0.5104	0.0012	0.0036	0.0256	0.0192	0.724	0.008	0.0172
0.0052	0.028	0.002	0.014	0.0172	0.0116			0.42	0.0032	0.0152	0.0024	0.0056	0.0836	0.006	0.032	0.006	0.008	0.01	0.02	0.0336	0.014		0.0104	0.0192	0.0276	0.0004	0.0056	0.0192	0.0584	0.062	0.0108	0.01	0.0088	0.0036	0.0448	0.0236	0.0048			0.0468	0.0224	0.0236	0.006	0.0136	0.0096	0.0196	0.0616
0.0272	0.0016	0.0184	0.0496	0.082	0.0148			0.0324	0.014	0.0032	0.0356	0.0332	0.014	0.0288	0.016	0.0096	0.0104	0.0588	0.03	0.0112	0.0064		0.004	0.038	0.0276	0.0068	0.2892	0.0386	0.468	0.0556	0.0064	0.0136	0.01	0.0348	0.014	0.0112	0.0168			0.0004	0.0124	0.2428	0.0828	0.0248	0.0072	0.0008	0.0184
0.0012	0.0004	0.0016	0.0104	0.0096	0.0044			0.03	3.4016	0.0108	0.0192	0.0868	0.0632	0.4608	0.0188	0.0524	0.0024	0.0552	0.1648	0.1276	0.0124		0.0008	0.03	0.0552	0.0692	0.0496	0.0324	0.2384	0.0276	0.0064	0.0792	0.0564	0.0068	0.0076	0.0144	0.024			0.1392	0.0056	0.0424	0.0204	0.0148	0.0824	0.1676	0.0176
0.0052	0.0196	0.0944	0.0112	0.01	0.0156			0.112	0.2164	0.0128	0.0016	0.0128	0.0252	0.0032	0.01	0.0344	0.0096	0.0152	0.0284	0.0464	0.0136		0.004	0.046	0.3808	0.0104	0.208	0.0462	0.6036	0.0092	0.2464	0.1212	0.0988	0.0132	0.0444	0.0096	0.01			0.0216	0.084	0.0092	0.0352	0.012	0.0024	0.0124	0.0204
0.006	0.0144	0.012	0.0156	0.0192	0.0196			0.0284	0.0008	0.0056	0.0112	0.2188	0.038	0.0708	0.0248	0.012	0.0308	0.0128	0.01	0.0672	0.0144		0.07	1.8264	0.0276	0.2976	0.0068	1.8264	0.1772	0.0236	0.0128	0.0172	0.0148	0.0436	0.0128	0.0332	0.0184			0.0088	0.018	0.0456	0.0124	0.0372	0.0212	0.0132	0.0428
0.0044	0.0012	0.9944	0.0776	0.0028	0.0004			0.0004	0.0132	0.002	0.002	0.002	0.0024	0.0128	0.0132	0.0136	0.0112	0.014	0.014	0.0076	0.0172		0.0008	0.0728	0.0188	0.0116	0.0532	0.0728	0.0372	0.014	0.012	0.0412	0.0184	0.0196	0.0012	0.0236	0.0264			0.0112	0.0548	0.0248	0.0108	0.0832	0.1636	0.0008	0.0244
0.0172	0.1992	0.0236	0.0012	0.0008	0.0124			0.0128	0.012	0.0164	0.004	0.0352	0.0208	0.0112	0.032	0.0044	0.0176	0.0012	0.0148	0.0156	0.0384		0.0352	0.0356	0.0024	0.0104	0.0232	0.0356	0.0056	0.01	0.002	0.0168	0.2692	0.0292	0.0148	0.004	0.0116			0.0144	0.082	0.0008	0.09	0.0236	0.0108	0.0208	0.0152
0.014	0.0148	0.0128	0.0424	0.0108	0.0192			0.0076	0.104	0.0228	0.3988	0.0544	0.0324	0.0044	0.026	0.03	0.016	0.0384	0.0452	0.9768	0.0388		0.0132	0.0004	0.008	0.0004	1.6628	0.0004	0.0076	0.1024	0.0132	0.0136	0.01	0.0092	0.0064	0.0284	0.0928			0.0004	0.0028	0.0592	0.2276	0.048	0.6476	0.018	0.0192
0.0816	0.0132	0.0124	0.008	0.0128	0.0124			0.014	0.1572	0.0024	0.0112	0.0072	3.9444	0.2232	0.012	0.0304	0.0092	0.008	0.0152	0.0124	0.3612		0.0008	0.02	0.0256	1.4496	0.0528	0.0268	0.0104	0.0024	0.4612	0.048	0.01	0.0232	0.01	0.0028	0.0148			0.0004	0.0116	0.0436	0.0152	0.0072	0.0128	0.0132	0.0336
0.0076	0.1296	0.0104	0.0124	0.0132	0.0156			0.0292	0.606	0.0064	0.0136	0.036	0.0016	0.0344	0.02	0.016	0.0132	0.0104	0.0044	0.006	0.0096		0.0088	0.0212	0.1936	0.1316	0.6204	0.0212	0.0104	0.0132	0.0048	0.008	0.0136	0.0128	0.012	0.068	0.2584			0.2704	0.1576	0.0504	0.0092	0.0112	0.0064	0.0056	0.0728
0.0224	0.03	0.038	0.0004	0.038	0.0156			0.1892	0.0324	0.0448	0.0688	0.0012	0.0076	0.014	0.114	0.004	0.0872	0.0208	0.0312	0.0072	0.0128		0.0276	15.2484	0.0196	0.0232	0.072	0.0672	0.798	0.002	0.032	0.0636	0.0252	0.022	0.0128	0.0084	0.0304			0.0068	0.0156	0.0248	0.0124	0.266	0.0036	0.0136	0.1552
0.0108	0.0436	0.002	0.0124	0.0268	0.0112			0.0012	0.1976	0.0272	0.0104	0.002	0.0084	0.1024	0.0108	0.0116	0.0128	0.0296	0.01	0.0236	0.012		0.034	0.0188	0.0084	0.0184	0.0096	0.002	0.8452	0.022	0.046	0.008	0.0976	0.0132	0.0152	0.0212	0.56			0.0032	0.092	0.0012	0.0076	0.0004	0.692	0.0364	0.034
0.0188	0.0428	0.2692	0.0192	0.0228	0.0868			0.526	0.0308	0.4564	0.0092	0.0024	0.006	0.104	0.0544	0.2208	0.0064	0.0116	0.0032	0.008	0.0096		0.0068	0.48	0.0276	0.0044	0.0508	0.4888	0.7256	0.0232	0.0064	0.0108	0.0004	0.0032	0.0244	0.0692	0.0128			0.0004	0.0092	0.0196	0.0108	0.0008	0.0144	0.0052	0.0472
0.004	0.0064	0.0388	0.0212	0.0252	0.0032			0.0812	0.0552	0.0204	0.456	0.4204	0.0044	0.2252	0.0024	0.0068	0.0364	0.1852	0.0132	0.0116	0.0044		0.0276	0.0796	0.0124	0.0296	0.0784	0.0796	0.0168	1.7648	0.0336	0.0068	0.0008	0.0032	0.0164	0.0092	0.0148			0.0148	0.1844	0.2032	0.0028	0.004	0.1412	0.0952	0.012
0.038	0.126	0.0204	0.0016	0.012	0.0124			0.0048	0.0312	0.0052	0.0152	0.0048	0.0004	0.36	0.0052	0.0108	0.072	0.0072	0.0176	0.0596	0.0156		0.0552	0.0112	0.3768	0.0292	0.0332	0.0112	0.0464	0.0276	0.0468	0.0136	0.008	0.0104	0.0372	0.008	0.0344			0.0156	0.0092	0.0288	0.018	0.0016	0.008	0.0108	0.0096
0.008	0.0076	0.0112	0.0188	0.0304	0.0256			0.0044	0.0308	0.0048	0.0008	0.0032	0.0092	0.0152	0.0148	0.0152	0.0056	0.0036	0.1724	0.0052	0.0352		0.0052	0.0016	0.0624	0.0032	0.0012	0.012	0.0104	0.0136	0.0156	0.0372	0.0052	0.0184	0.0136	0.0336	0.0068			0.0296	0.0548	0.0068	0.0188	0.002	0.2576	0.0128	0.0268
0.0196	0.0412	0.0328	0.0152	0.0588	0.078			0.0028	0.0728	0.0644	0.072	0.0064	0.0548	0.0316	0.0216	0.0172	0.0092	0.0132	0.0236	0.2776	0.0212		0.2264	0.0364	0.0012	0.1484	2.6004	0.0364	0.0192	0.1532	0.008	0.01	0.0156	0.0136	0.0152	0.0112	0.0056			0.7488	0.0008	0.0156	0.0004	0.0356	0.8168	0.0036	0.0288
0.0112	0.0296	0.0264	0.004	0.0064	0.0112			0.0088	0.0152	0.0004	0.0548	0.0112	0.0204	0.0372	0.0152	0.0092	0.0068	0.0192	0.0068	0.0368	0.0232		0.014	0.0388	0.0052	0.0296	0.0044	0.0388	0.9516	0.0728	0.0204	0.0144	0.0208	0.0236	0.0012	0.2928	0.0344			0.8884	0.0024	0.1324	0.1868	0.116	0.0004	0.0028	0.0128
0.0304	0.02	0.0228	0.0408	0.0044	0.0124			0.0116	0.0004	0.0016	0.064	0.0096	0.0836	0.0148	0.0236	0.0132	0.0088	0.0164	0.0024	0.034	0.012		0.0128	0.0116	0.0136	0.012	0.406	0.0116	0.1888	0.0672	0.3368	0.0568	0.024	0.0416	0.0096	0.0204	0.1056			0.0008	0.0464	0.0096	0.0112	0.0384	0.0124	0.0044	0.014
0.006	0.0916	0.0044	0.0124	0.0076	0.0096			0.648	0.0212	0.0052	0.0004	0.0004	1.4048	0.002	0.0156	0.024	0.0008	0.0532	0.4124	0.0276	0.0112		0.0004	0.4232	0.232	0.0636	0.0732	0.4232	0.0244	0.0244	0.004	0.0048	0.0248	0.0072	0.0112	0.0136	0.004			0.0064	0.004	0.0516	0.0064	0.022	0.1096	0.0128	0.0112
0.0088	0.0096	0.0124	0.0072	0.008	0.0544			0.1916	0.6536	0.0744	0.0108	0.1184	0.0072	0.0124	0.004	0.0316	0.0268	0.0396	0.0168	0.0148	0.0336		0.008	0.2396	0.2384	0.0248	0.3744	0.2396	0.1032	0.1828	0.0968	0.0108	0.0112	0.0064	0.0004	0.0288	0.0352			0.1388	0.01	0.002	0.026	0.0172	0.4192	0.016	0.03
0.0116	0.0056	0.0176	0.0064	0.0608	0.0024			0.0036	0.1916	0.17	0.0076	0.3224	0.0028	0.0208	0.016	0.016	0.016	0.012	0.0176	0.088	0.0136		0.0792	0.0728	0.0448	0.01	0.1592	0.0728	0.0196	0.1576	0.06	0.0176	0.0152	0.0004	0.0028	0.0104	0.0796			1.3636	0.0052	0.0944	0.0052	0.0184	0.0136	0.3852	0.0052
0.074	0.054	0.0164	0.0144	0.0028	0.0132			0.0132	0.0068	0.008	0.0008	0.0004	0.114	0.0244	0.0176	0.0068	0.0044	0.0108	0.0308	0.0104	0.0136		0.0088	0.1084	0.1436	0.7656	0.0008	0.1084	0.0468	0.2764	0.0052	0.0708	0.0128	0.0044	0.0096	0.0208	0.0228			0.3248	0.0536	0.222	0.0416	0.0004	0.0024	0.0044	0.0556
0.0096	0.0212	0.0128	0.0192	0.028	0.0104			0.0672	0.006	0.0092	0.9148	0.004	0.024	0.0144	0.0112	0.0148	0.01	0.0176	0.0204	0.0164	0.0136		0.0096	0.0052	0.1632	0.0388	0.0096	0.0052	0.0256	0.2472	0.0348	0.0332	0.2836	0.03	0.024	0.0136	0.0248			0.268	0.256	0.0096	0.0184	0.0176	0.228	0.0056	0.0268
0.0608	0.0104	0.01	0.016	0.002	0.0056			0.134	0.0592	0.0292	0.0688	0.0024	0.0232	0.0376	0.4576	0.0004	0.01	0.0104	0.0096	0.0128	0.0156		0.0004	0.0152	0.0384	0.256	0.0148	0.0152	0.092	0.3348	0.0408	0.0204	0.0156	0.0176	0.0044	0.0116	0.02			0.0208	0.0988	0.0356	0.0328	0.078	0.0092	0.0516	0.0176
0.0948	0.0128	0.004	0.0248	0.0024	0.0028			0.004	0.0072	0.0044	0.014	0.002	0.0232	0.0144	0.0144	0.0028	0.0088	0.014	0.0196	0.0092	0.024		0.0032	0.0532	0.0624	0.2504	0.0424	0.0532	0.0292	0.1472	0.0144	0.0268	0.0032	0.0108	0.0136	0.0212	0.0076			0.04	0.006	0.0044	0.0932	0.002	0.0464	1.692	0.0796
0.016	0.0052	0.0276	0.01	0.008	0.0368			0.3292	0.0076	0.04	0.0152	0.0612	0.0496	0.0092	0.0288	0.0124	0.002	0.012	0.0052	0.0052	0.0124		0.016	0.076	0.032	0.0396	0.0404	0.0762	0.6728	0.0028	0.012	0.0128	0.0004	0.0196	0.018	0.678	0.166			0.0104	0.0064	0.9044	6.9372	0.0028	0.0148	0.02	0.0028
0.0072	0.01	0.0544	0.0108	0.0332	0.0116			0.0008	0.0016	0.0056	0.1116	0.0048	0.0176	0.1096	0.01	0.0152	0.0132	0.0084	0.0092	0.0188	0.012		0.0852	0.0424	0.0032	0.0028	0.0148	0.0424	0.0008	0.0216	0.0276	0.0116	0.0128	0.0456	0.0032	0.0344	0.0192			0.0088	0.0264	0.0316	0.0984	0.246	0.0168	0.0044	0.012
0.064	0.0196	0.0052	0.012	0.024	0.15			0.0692	0.0216	1.6476	0.0024	0.064	0.0316	0.2996	0.0136	0.0832	0.0104	0.0244	0.004	0.0296	0.012		0.0332	0.0064	0.0024	0.008	0.0116	0.0064	0.786	0.028	0.1212	0.0088	0.4208	0.0252	0.0148	0.0616	0.0056			0.0588	0.01	0.0488	0.002	0.0028	0.0096	0.2268	0.0136
0.2448	0.0088	0.0332	0.014	0.0156	0.0456			1.9088	0.0404	0.0192	0.7304	0.006	0.0132	0.02	0.0164	0.0268	0.0128	0.0108	0.0028	0.0284	0.0044		0.0104	0.0968	0.0684	0.0016	0.0272	2.406	6.3336	0.0072	0.1552	0.0212	0.0032	0.0236	0.0072	0.0152	0.0024			0.0508	0.0196	0.1896	0.0352	4.714	0.0096	0.0168	0.0412
0.0732	0.004	0.014	0.0112	0.006	0.0196			0.0912	0.0684	0.228	0.0004	0.1852	0.2348	0.212	0.2128	0.0012	0.0072	0.016	0.0196	0.0776	0.002		0.0032	0.0116	0.0912	0.0308	0.1048	0.0116	0.0088	0.0112	0.112	0.012	0.0072	0.0596	0.0028	0.0016	0.0128			0.0748	0.0196	0.028	0.0132	0.3188	0.0248	0.008	0.008
0.0652	0.0096	0.0052	0.016	0.0148	0.0244			0.1712	0.0172	0.01	0.0948	0.0124	0.0104	0.0208	0.0032	0.012	0.0136	0.0012	0.0288	0.0104	0.038		0.1496	0.654	0.012	0.0772	0.012	0.6548	0.24	0.01	0.0568	0.0144	0.1548	0.0076	0.0116	0.0236	0.0064			3.5548	0.0032	0.0068	0.0076	0.0668	0.0084	0.296	0.0216
0.0304	0.0296	0.0036	0.0056	0.0044	0.01			0.02	0.028	0.3764	0.004	0.0116	0.4532	0.0472	0.0008	0.016	0.01	0.0016	0.0152	0.0312	0.0156		0.0128	0.248	0.032	0.0112	0.0212	0.2486	0.3248	0.01	0.0256	0.0116	0.0092	0.018	0.0512	0.0064	0.0632			0.1064	0.0176	0.0684	0.0084	0.1828	0.048	0.0128	0.0152
0.0196	0.0012	0.018	0.0976	0.0852	0.01			0.0008	0.0116	0.0044	0.2608	0.0112	0.0016	0.0112	0.01	0.0132	0.0088	0.0128	0.046	0.0008	0.012		0.0136	0.002	0.0684	0.0068	0.286	0.0026	0.0048	0.1684	0.0356	0.0004	0.0348	0.0164	0.036	0.018	0.0132			0.0128	0.0272	0.002	0.0104	0.036	0.1112	0.0096	0.036
0.0084	0.014	0.0704	0.036	0.1272	0.0132			0.1056	0.0144	0.0176	0.0908	0.0052	0.0192	0.0104	0.0164	0.0172	0.0188	0.006	0.0092	0.012	0.0148		0.012	0.0456	0.008	0.006	0.0232	0.0456	0.0064	0.4808	0.0128	0.01	0.01	0.0128	0.0368	0.7088	0.002			0.0184	0.0032	0.0552	0.0152	0.3528	0.0072	0.0276	0.0396
0.0288	0.0548	0.012	0.0296	0.0016	0.018			0.0524	0.0608	0.0076	0.002	0.0052	0.0016	0.0004	0.0144	0.1368	0.0016	0.0412	0.0096	0.0128	0.0148		0.0092	0.0004	0.2076	0.008	0.024	0.038	0.0052	0.1856	0.0176	0.0112	0.018	0.0172	0.0056	0.008	0.0024			0.0028	0.0024	0.1672	0.03	0.002	0.058	0.0124	0.0108
0.002	0.0032	0.0268	0.0648	0.0028	0.0344			0.0064	0.0572	0.0144	0.0088	0.106	0.0016	1.844	0.0124	0.0008	0.0144	0.0484	0.0096	0.0132	0.0152		0.0136	0.0084	0.02	0.0092	0.0772	0.0084	0.0012	0.0596	0.0328	0.0068	0.1892	0.0076	0.0112	0.0288	0.0076			0.0972	0.25	0.0928	0.0868	0.036	0.0252	0.002	0.0176
0.0092	0.01	0.016	0.0084	0.0736	0.0128			1.6572	1.4708	0.0024	0.0708	0.0492	0.0024	0.0416	0.0112	0.0456	0.0128	0.0932	0.0408	0.1404	0.04		0.0316	0.0568	0.0056	0.0168	0.0392	0.0568	6.2536	0.016	0.0124	0.0092	0.0132	0.0152	0.0056	0.0184	0.022			0.0072	0.1008	0.1164	0.0188	0.2336	0.0096	0.0152	0.0036
0.026	0.0032	0.0104	0.0104	0.0152	0.0076			0.0388	0.016	0.0412	0.0116	0.4968	0.0012	0.084	0.0156	0.0012	0.014	0.0492	0.004	0.0084	0.0164		0.0224	0.0052	0.0128	0.0124	0.2124	0.016	0.1032	0.0004	0.0284	0.01	0.0424	0.0092	0.0248	0.0088	0.0508			0.0468	0.022	0.1836	0.0028	1.2224	0.1416	0.0248	0.01
0.024	0.0076	0.0124	0.012	0.0216	0.0372			0.2348	0.0924	0.1724	0.0072	0.4148	0.0248	0.0124	0.0452	0.0132	0.0056	0.0784	0.036	0.004	0.0192		0.0004	0.0052	0.0268	0.0076	0.0092	0.014	0.04	0.0344	0.0084	0.0204	0.006	0.0112	0.0128	0.0188	0.0012			0.0284	0.0304	0.0028	0.0136	0.0028	0.0144	0.0128	0.0176
0.0028	0.0964	0.044	0.0268	0.0192	0.0124			0.0048	0.0152	0.0796	0.176	0.054	0.0252	0.0356	0.0008	0.014	0.0252	0.016	0.0008	0.0124	0.0116		0.028	0.01	0.0108	0.3088	0.0392	0.0128	0.1948	0.0252	0.0192	0.0136	0.0044	0.0108	0.0104	0.0024	0.0148			0.0024	0.0172	0.002	0.06	0.0148	0.0036	0.0172	0.0148
0.0012	0.0408	0.0324	0.3848	0.0024	0.0076			0.0068	0.0208	0.0168	0.054	0.0096	0.0312	0.0128	0.0288	0.004	0.0124	0.0012	0.0496	0.0124	0.0104		0.026	0.084	0.0252	0.0208	0.0232	0.0846	0.0236	0.0144	0.0152	0.01	0.0104	0.0088	0.0148	0.2788	0.0248			0.4124	0.0372	0.0048	0.0316	0.022	0.0828	0.0592	0.012
0.012	0.0112	0.0016	0.0408	0.0076	0.0228			0.06	0.0212	0.0032	0.014	0.0096	0.094	0.0344	0.0152	0.0096	0.0056	0.0128	0.0276	0.1772	0.0296		0.0144	0.0048	0.0332	0.2944	0.088	0.0048	0.0056	0.0164	0.054	0.0124	0.0176	0.0132	0.0424	0.0124	0.0224			0.0004	0.0504	0.0008	0.0088	0.0436	0.4976	0.6496	0.0576
0.0276	0.016	0.0136	0.0088	0.0004	0.014			0.0152	0.0404	0.0116	0.022	0.0028	0.0012	0.086	0.01	0.0356	0.0192	0.0156	0.022	0.03	0.0104		0.0108	0.1264	0.3184	0.0048	0.0032	0.1264	0.002	0.076	0.0452	0.0232	0.0164	0.016	0.0076	0.0352	0.0208			0.2468	0.008	0.002	0.0912	0.0684	0.002	0.1952	0.0148
0.0088	0.0204	0.0032	0.0016	0.0108	0.0136			0.0504	0.6516	0.1904	0.008	0.0012	0.0088	0.0028	0.0096	0.0124	0.0244	0.0072	0.016	0.0156	0.0008		0.0868	0.0164	0.0136	0.0812	0.0468	0.0164	0.0924	0.3176	0.022	0.0212	0.01	0.0036	0.0036	0.0124	0.0464			0.1536	0.0084	0.0148	0.0068	0.1892	0.2676	0.0352	0.0124
0.092	0.0076	0.01	0.0112	0.0188	0.0144			0.0316	0.2064	0.0024	0.0036	0.0256	0.0832	0.0332	0.0488	0.0268	0.0292	0.0012	0.0084	0.004	0.0036		0.1304	0.002	0.0136	0.0748	0.056	0.002	0.3344	0.0072	0.0244	0.0116	0.026	0.0108	0.0984	0.0252	0.0016			0.2024	0.1096	0.368	0.0972	0.0036	0.0036	0.0172	0.0112
0.0348	0.0084	0.0116	0.0164	0.1128	0.004			0.0552	0.1296	0.0432	0.0084	0.0304	0.0136	0.0176	0.0124	0.0324	0.0384	0.0516	0.0024	0.0264	0.1388		0.0028	0.0124	0.0016	0.1352	0.004	0.0124	0.0112	1.266	0.0532	0.0036	0.014	0.2044	0.0004	0.11	0.008			1.2844	0.0048	0.036	0.0048	0.3632	0.0028	0.0172	0.0036
0.15	0.0324	0.014	0.0096	0.05	0.0104			0.026	0.1184	0.0328	0.0396	0.0128	0.3228	1.08	0.0096	0.0152	0.012	0.0364	0.068	0.024	0.0092		0.0268	7.0036	0.01	0.1028	0.0016	0.08	0.4628	0.0024	0.0112	0.0332	0.0076	0.0476	0.0112	0.0044	0.0304			0.0088	0.2556	0.1784	0.0252	0.0004	0.0204	0.0448	0.0276
0.0292	0.0124	0.0008	0.0092	0.1408	0.0992			0.0136	1.31	0.1132	0.0112	0.0072	0.0124	0.0212	0.0112	0.0032	0.016	0.0068	0.0124	0.0184	0.008		0.0148	0.042	0.0156	0.0308	0.0364	0.0428	4.0436	0.014	11.3152	0.054	0.0352	0.0024	0.142	0.0128	0.0084			0.026	0.008	0.0624	0.0164	0.0024	0.0416	0.0224	0.016
0.0144	0.0036	0.012	0.0104	0.014	0.01			0.0684	0.018	0.036	0.0008	0.0256	0.0036	0.0328	0.0156	0.0188	0.02	0.0004	0.0008	0.0168	0.0104		0.0012	0.0252	0.0176	0.0208	0.0856	0.0252	0.1068	0.0016	0.0256	0.0224	0.0004	0.012	0.0344	0.0328	0.0036			0.0356	0.1196	0.016	0.03	0.0004	0.05	0.018	0.0132
0.056	0.0284	0.0108	0.0132	0.0296	0.0096			0.052	0.0088	0.032	0.0148	0.0064	0.0024	0.0452	0.082	0.0084	0.0032	0.0844	0.0032	0.0108	0.2608		0.026	0.0052	0.0072	0.0044	0.2068	0.0052	0.7492	0.0028	0.0268	0.142	0.0356	0.0216	0.0176	0.0088	0.008			0.3484	0.0112	0.0012	0.0216	5.2824	0.0104	0.0064	0.0772
0.0124	0.0044	0.0132	0.0016	0.1444	0.0152			0.0116	0.0624	0.1092	0.0128	0.0548	0.058	0.0124	0.02	0.0092	0.026	0.02	0.0276	0.1604	0.0128		0.0212	0.0608	0.0516	0.0072	0.0128	0.022	0.004	0.0448	0.0004	0.1152	0.0112	0.01	0.0004	0.0152	0.1684			0.0056	0.0184	0.0056	0.0156	0.02	0.0364	0.0252	0.0248
0.0316	0.018	0.156	0.0176	0.0104	0.0228			0.1532	0.0028	0.0564	0.004	0.0024	0.0232	0.0024	0.0388	0.0184	0.0144	0.008	0.0116	0.0152	0.0032		0.0296	0.0208	0.0012	0.0024	0.0016	0.0208	0.0536	0.0368	0.01	0.012	0.02	0.0144	0.0004	0.004	0.0528			0.0056	0.0888	2.27	0.0072	0.0052	0.024	0.0748	0.0184
0.0332	0.1932	0.036	0.0104	0.092	0.0008			0.0164	0.4876	0.0024	0.0092	0.0204	0.1296	0.01	0.0104	0.05	0.0052	0.0104	0.0476	0.0016	0.0072		0.0132	0.004	0.012	0.0036	0.1504	0.0042	0.384	0.0212	0.0144	0.006	0.0048	0.0536	0.0364	0.0128	0.0088			0.0088	0.01	0.0112	0.0048	0.0028	0.0016	0.866	0.04
0.0012	0.05	0.0048	0.0184	0.4172	0.0296			0.0164	0.03	0.022	0.0156	0.1888	0.0052	0.0016	0.0184	0.0704	0.0152	0.024	0.012	0.0056	0.0028		0.0192	0.0012	0.0284	0.0008	0.5468	0.03	0.0028	0.0072	0.0048	0.0056	0.0016	0.0016	0.002	0.0128	0.0304			0.004	0.0016	0.0152	0.0008	0.0044	0.0104	0.064	0.0044
0.0056	0.0116	0.0148	0.0012	0.0116	0.0208			0.0368	0.0048	0.0128	0.3372	0.0064	0.1844	0.0112	0.0144	0.0052	0.0128	0.006	0.0012	0.0072	0.016		0.156	0.0784	0.0068	0.0004	0.1968	0.006	0.0152	0.0136	0.0092	0.0112	0.004	0.0316	0.0136	0.004	0.1392			0.336	0.0216	0.01	0.052	1.4812	0.1396	0.0128	0.0116
0.0156	0.01	0.054	0.0104	0.0204	0.0476			0.0236	0.0256	0.3132	0.0096	0.01	0.0076	0.042	0.018	0.0108	0.0064	0.0344	0.0224	0.078	0.0072		0.0444	0.0028	0.6528	0.0296	0.0048	0.0028	0.1064	0.0124	0.0016	0.0164	0.01	0.0088	0.0112	0.004	0.0272			0.036	0.0132	0.012	0.026	0.008	0.0948	0.0124	0.0032
0.0628	0.0732	0.0044	0.0088	0.0244	0.014			0.024	0.004	0.02	0.0764	0.032	0.252	0.0464	0.042	0.012	0.0076	0.0028	0.0248	0.0316	0.0456		0.004	0.006	0.0428	0.0204	0.0008	0.0064	0.3204	0.2184	0.0996	0.0296	0.0184	0.0144	0.0176	0.0636	0.0136			0.0212	0.0108	0.2876	0.0032	0.0096	0.0252	0.008	0.0132
0.0508	0.002	0.0104	0.0132	0.0752	0.012			0.0228	0.0372	0.0208	0.06	0.0092	0.0068	0.0332	0.014	0.5584	0.0012	0.0004	0.0064	0.1336	0.036		0.0312	0.0388	0.0604	0.0256	0.034	0.002	0.0076	0.0064	0.0428	0.0124	0.0376	0.0376	0.0008	0.0044	0.0172			0.0012	0.0112	0.0052	0.0056	0.012	0.0324	0.0092	0.0156
0.0144	0.0104	0.0204	0.0096	0.0104	0.044			0.018	0.1256	0.128	0.0184	0.0116	0.0048	0.0016	0.014	0.016	0.0116	0.0088	0.0216	0.0068	0.0124		0.2348	0.0128	0.0248	0.0072	0.0416	0.002	0.214	0.0092	0.1728	0.0104	0.0284	0.01	0.0228	0.0316	0.038			0.0052	0.004	1.3924	0.03	0.0112	0.0088	0.0428	0.0068
0.0296	0.0004	0.0332	0.04	0.0164	0.066			0.0096	0.0228	0.0168	0.0708	0.0152	0.3788	0.0988	0.0136	0.0084	0.0224	0.1108	0.0052	0.2344	0.026		0.0132	0.0232	0.0284	0.0288	0.5196	0.0232	0.006	0.0036	0.0236	0.0068	0.014	0.0172	0.014	0.0044	0.0236			0.0076	0.004	0.14	0.0096	0.0348	0.0364	0.0016	0.0124
0.008	0.0216	0.0096	0.006	0.0028	0.0128			0.434	0.0076	0.022	0.0904	0.056	0.1872	0.0292	0.002	0.0128	0.0096	0.0344	0.0148	0.01	0.0124		0.0132	0.0072	0.0188	0.0164	1.904	0.0072	0.028	0.0312	0.0132	0.0088	0.2136	0.0132	0.0004	0.012	0.1528			0.0744	0.0144	0.0136	0.106	0.0248	0.2888	0.314	0.0036
0.0448	0.0232	0.0036	0.0088	0.1652	0.01			2.0868	0.0424	0.0172	0.0192	0.0008	0.9824	0.0696	0.052	0.004	0.0172	0.0096	0.0104	0.002	0.046		0.062	0.4448	0.0128	0.0784	0.0104	0.4448	0.034	0.0136	0.0128	0.0012	0.0576	0.0116	0.0052	0.028	0.0252			0.0212	0.0836	0.4004	0.1684	0.1456	0.0236	0.002	0.0132
0.0412	0.0004	0.002	0.0156	0.002	0.0232			0.0132	0.0408	0.0136	0.2792	0.0116	0.004	0.0284	0.0164	0.0056	0.0092	0.0116	0.0328	0.0004	0.0072		0.0096	0.0536	0.0052	0.0188	0.0132	0.0536	0.072	0.0008	0.0456	0.0056	0.0028	0.0224	0.0112	0.002	0.0012			1.8596	0.0048	0.0244	0.4252	0.0072	0.1348	0.0092	0.3032
0.0128	0.0444	0.252	0.014	0.0064	0.0164			0.03	0.0228	0.0352	0.0248	0.0348	0.002	0.0168	0.0168	0.018	0.0184	0.0084	0.0368	0.028	0.0552		0.0168	0.0076	0.3188	0.002	0.022	0.0076	0.1056	0.0476	0.0144	0.0112	0.0012	0.01	0.0192	0.018	0.0072			0.0052	0.0052	0.0044	0.0272	0.058	0.016	0.05	0.192
0.0744	0.0024	0.028	0.1272	0.0068	0.0372			0.008	0.0012	0.0004	0.012	0.1976	1.232	0.0668	0.004	0.0112	0.0408	0.008	0.0976	1.1056	0.006		0.3172	0.0116	0.0004	0.0848	0.0048	0.0116	0.3372	0.0108	0.0264	0.01	0.0088	0.016	0.1324	0.0392	0.012			0.3972	0.002	0.0088	0.0092	0.3804	0.0476	0.0112	0.1248
0.0148	0.0156	0.09	0.0016	0.0072	0.0376			0.0028	0.2916	0.0176	0.1172	0.0296	0.1464	0.0284	0.0052	0.0204	0.012	0.0136	0.104	0.012	0.0108		0.0228	0.3256	0.0228	0.002	0.742	0.3256	0.0128	0.0088	0.0056	0.0208	0.014	0.0188	0.0524	0.0984	0.082			0.0176	0.0164	0.006	0.0028	0.0564	0.1616	0.2844	0.0292
0.0504	0.0008	0.0288	0.01	0.0124	0.1008			0.0016	0.0032	0.0008	0.0072	0.0236	0.7876	0.0124	0.036	0.004	0.0192	0.0184	0.1004	0.0084	0.0116		0.0088	0.2228	0.7616	0.0104	0.0004	0.2228	0.0404	0.05	0.4436	0.0044	0.0144	0.0144	0.0196	0.0168	0.0104			0.0116	0.0032	0.06	0.0072	0.0592	0.0004	0.0088	0.2288
0.0048	0.0072	0.0388	0.0116	0.002	0.014			0.1428	0.0004	0.164	0.2884	0.0028	0.018	0.088	0.0156	0.0728	0.0204	0.0436	0.0008	0.0112	0.0132		0.002	0.0216	0.1768	0.0012	3.7544	0.0216	0.0192	0.0016	0.016	0.018	0.0884	0.0172	0.0024	0.0156	0.042			0.1084	0.0016	0.0136	0.0084	0.0148	0.008	0.074	0.018
0.0032	0.0004	0.0084	0.0128	0.0084	0.0232			0.0132	0.0068	0.0192	0.0012	0.0208	0.0032	0.0056	0.0076	0.0732	0.0116	0.01	0.0024	0.032	0.012		0.0068	0.0556	0.0724	0.0876	0.0032	0.0556	0.0292	0.0236	0.0124	0.0008	0.0092	0.0344	0.0128	0.0264	0.0064			0.012	0.0036	0.0072	0.0016	0.0168	0.0128	0.1484	0.0172
0.002	0.2716	0.0348	0.0112	0.0132	0.0204			0.008	0.4148	0.5096	0.0024	0.0004	0.0648	0.076	0.0092	0.0088	0.0116	0.0184	0.006	0.0052	0.014		0.0048	0.0104	0.2344	0.0084	0.0148	0.0104	0.0404	0.0124	0.0084	0.0068	0.0024	0.034	0.0092	0.0208	0.1052			0.006	0.0124	0.1676	0.0184	1.1648	0.1492	0.0144	0.0068
0.0204	0.008	0.0176	0.0212	0.0016	0.0072			0.002	0.0144	0.0828	0.0564	0.014	0.0132	0.01	0.0712	0.0156	0.01	0.0592	0.014	0.0184	0.0148		0.0324	0.1668	0.0756	0.0096	0.0376	0.1668	0.0004	0.0028	0.0004	0.0992	0.0088	0.0196	0.0116	0.0156	0.0104			0.01	0.706	0.0488	0.0036	0.0004	0.038	0.0208	0.0968
0.0152	0.0104	0.1576	0.008	0.0192	0.0324			0.0004	0.006	0.03	0.0132	0.0404	0.0064	0.0188	0.0092	0.0272	0.0072	0.016	0.0092	0.0004	0.0308		0.3424	0.1284	0.0056	0.0012	3.8212	0.1284	0.2804	0.788	0.004	0.0008	0.0104	0.0076	0.0356	0.02	0.0604			0.0408	0.0092	1.6996	0.0124	0.006	0.0792	0.0192	0.4144
0.0216	0.0172	0.0144	0.1684	0.0304	0.0112			0.2008	6.4236	0.0388	0.4212	0.0076	0.0008	0.0012	0.012	0.0172	0.008	0.0292	0.0096	0.008	0.0172		0.0132	0.004	0.0084	0.0088	0.0044	0.0048	0.1912	0.1172	0.0356	0.016	0.0336	0.0228	0.0176	0.0192	0.0036			0.0392	0.0044	0.016	0.1096	0.0136	0.0504	0.1072	0.5596
0.348	0.0272	0.002	0.036	0.006	0.0104			0.05	0.0556	0.0084	0.0064	0.0024	0.0096	0.0152	0.0076	0.0116	0.006	0.0072	0.058	0.0116	0.0004		0.0276	0.0268	0.0116	0.0096	0.0072	0.0268	3.32	0.0112	0.074	0.0288	0.01	0.0084	0.006	0.0116	0.0744			0.1268	0.0184	0.0556	0.028	0.0664	0.03	0.0148	0.012
0.002	0.0132	0.036	0.01	0.0208	0.0124			0.0004	0.1588	0.0392	0.0012	0.0084	0.0056	0.0304	0.0012	0.1156	0.0168	0.0132	0.0092	0.0552	0.01		0.104	0.0732	0.004	0.0416	0.4848	0.0732	1.266	0.77	0.072	0.0092	0.0076	0.01	0.0008	0.1928	0.1344			0.002	0.0212	0.0232	0.092	0.1664	0.0232	0.0028	0.0144
0.0712	0.0608	0.0108	0.0104	0.004	0.0104			0.0424	0.0204	0.1864	0.0248	0.0176	0.0144	0.022	0.0052	0.0272	0.012	0.018	0.0036	0.0276	0.0164		0.0124	0.0012	0.5304	0.0668	1.4952	0.0012	0.0016	0.0096	0.0136	0.0052	0.0396	0.0096	0.014	0.004	0.016			0.0004	0.034	0.0024	0.0208	0.01	0.0008	0.0228	0.0144
0.0216	0.008	0.0392	0.0136	0.0092	0.0128			0.034	0.0004	0.0256	0.034	0.5448	0.2704	0.0052	0.0008	0.0204	0.0104	0.0892	0.0192	0.0136	0.0096		0.0032	0.5336	0.0736	0.0068	0.0528	0.5336	0.0004	0.1024	0.0148	0.0116	0.4844	0.0128	0.096	0.0124	0.0056			0.2388	0.0872	0.0312	0.0196	0.0196	0.1548	0.0168	0.2032
0.0136	0.0068	0.0152	0.0132	0.0272	0.0136			0.0044	0.2676	0.0052	0.0112	0.0084	0.178	0.0592	0.0624	0.0188	0.0136	0.0112	0.0128	0.0016	0.0756		0.0192	0.0172	0.0304	0.1056	0.002	0.0172	0.02	0.004	0.0116	0.0856	0.036	0.0104	0.018	0.0256	0.022			0.0636	0.006	0.2068	2.8472	0.0012	0.016	0.1024	0.0704
0.0104	0.0072	0.01	0.0084	0.0296	0.0084			0.0036	0.2412	0.032	1.0904	0.0024	0.0516	0.5056	0.0644	0.012	0.008	0.0064	0.0148	0.0124	0.1632		0.016	0.002	0.016	0.0004	0.0468	0.0024	0.0008	0.0076	0.0212	0.0112	0.0296	0.0068	0.0112	0.01	0.0308			0.0004	0.0208	0.0016	0.0476	0.01	0.2196	0.1124	0.0372
0.054	0.0024	0.0048	0.0276	0.0044	0.0284			0.0216	0.0108	0.0364	0.0132	0.0168	0.1364	0.0108	0.0204	0.014	0.01	0.0112	0.01	0.0048	0.0168		0.0332	0.0376	0.0008	0.008	0.0428	0.0376	0.0004	0.0144	0.012	0.036	0.0268	0.0304	0.0112	0.0084	0.0004			0.0532	0.0152	0.108	0.0004	0.0192	0.0204	0.0596	0.008
0.0344	0.0148	0.0104	0.002	0.0096	0.0096			2.9144	0.0008	0.5424	0.01	0.0144	0.3776	0.0168	0.0176	0.0244	0.0132	0.01	0.0232	0.0076	0.0708		0.0068	0.0344	0.0016	0.0156	0.1472	0.0344	0.1484	0.0096	0.0136	0.012	0.0124	0.032	0.0024	0.0056	0.0508			0.16	0.0152	0.0044	0.0404	0.112	0.052	0.006	0.02
0.0104	0.0324	0.02	0.0456	0.008	0.0144			0.0112	0.0004	0.0616	0.0108	0.0132	0.0008	0.0244	0.0088	0.0144	0.0348	0.0116	0.0128	0.1016	0.1228		0.0292	0.0384	0.006	0.6352	0.0644	0.0384	0.0004	0.0008	2.0932	0.01	0.01	0.0108	0.0104	0.1264	0.0284			0.018	0.0192	0.2404	0.0024	0.0384	0.0096	0.0224	0.0048
0.0088	0.0148	0.1264	0.0088	0.004	0.0256			0.0044	0.0084	0.0004	0.0024	0.0096	0.0116	0.0252	0.2248	0.0272	0.0832	0.0544	0.1264	0.0452	0.0044		0.0276	0.0448	0.0848	0.004	0.0416	0.0448	0.1708	0.0248	0.042	0.0016	0.0556	0.0128	0.0176	0.0136	0.0716			0.0056	0.0424	0.0044	0.0372	0.0092	0.0424	0.0388	0.0136
0.0788	0.0328	0.2248	0.052	0.0016	0.01			0.0152	0.0072	0.0104	0.0068	0.0252	0.006	0.024	0.0056	0.01	0.01	0.0128	0.0016	0.0164	0.0208		0.0456	1.7512	0.0012	0.0536	0.0024	1.7512	0.0004	0.0092	0.0644	0.0116	0.012	0.0104	0.0296	0.0412	0.0132			0.0512	0.0428	0.0716	0.012	0.014	0.0252	0.0128	0.0004
0.2	0.2032	0.0076	0.0064	0.0116	0.0048			0.1476	0.2872	0.0008	0.01	0.0028	0.0184	0.0164	0.0076	0.006	0.0128	0.0372	0.012	0.0344	0.0064		0.0124	0.0184	0.0032	0.0004	0.3276	0.162	0.0112	0.0112	0.014	0.01	0.0884	0.0156	0.0232	0.0044	0.024			0.0072	0.0612	1.4084	0.032	0.0172	0.0392	0.0256	0.02
0.0032	0.0444	0.0232	0.0268	0.006	0.0108			0.2136	0.0104	0.0064	0.0428	0.0284	0.064	0.0072	0.0108	0.0156	0.0516	0.01	0.0528	0.0292	0.0392		0.032	0.0336	0.02	0.0464	0.042	0.05	0.1064	0.0212	34.6572	0.0116	0.0128	0.006	0.01	0.0236	0.0128			0.0104	0.1	0.0344	0.0568	0.0356	0.0252	0.0932	0.0428
0.0176	0.03	0.0396	0.0028	0.0076	0.0024			0.0036	0.002	0.014	0.154	0.484	0.3792	0.002	0.0136	0.0112	0.01	0.0172	0.0336	0.052	0.012		0.0084	0.1068	0.0712	0.01	0.008	0.1068	0.0076	0.042	2.2704	0.034	0.0352	0.0232	0.0416	0.006	0.012			0.2224	0.0796	0.0516	0.0104	0.0024	0.0248	0.0056	0.01
0.0016	0.01	0.0124	0.0072	0.204	0.0008			0.0116	0.0488	0.0148	0.1292	0.1332	0.006	0.0136	0.032	0.0012	0.012	0.0236	0.038	0.0096	0.0112		0.0004	0.5984	0.0116	0.028	0.558	0.5984	0.0116	0.0052	0.0048	0.2892	0.0856	0.0132	0.0156	0.0228	0.0156			0.1004	0.0892	0.0012	0.0448	1.4168	0.3908	0.0288	0.012
0.0024	0.0064	0.0148	0.0224	0.0156	0.0208			0.0404	0.4416	0.01	0.138	0.2388	0.0008	8.406	0.0312	0.0112	0.0176	0.0108	0.0272	0.0008	0.012		0.054	0.3816	0.0988	0.0024	0.0036	0.3816	0.0692	0.0136	0.0132	0.0284	0.028	0.0084	0.0388	0.0152	0.0048			0.0564	0.0004	0.0432	0.032	0.3584	0.0264	0.0044	0.0024
0.002	0.0136	0.0024	0.0112	0.0152	0.0276			0.03	0.0096	0.2868	0.046	0.0184	0.0208	0.1672	0.194	0.0016	0.012	0.0104	0.0332	0.0872	0.012		0.02	0.042	0.022	0.0172	1.4944	0.0428	0.1628	0.014	0.0236	0.0304	0.0004	0.0136	0.0112	0.2608	0.0192			0.4816	0.004	0.0004	0.216	0.0096	0.0148	0.0344	0.0164
0.0948	0.0096	0.0472	0.0124	0.014	0.0032			0.0596	0.014	0.0328	0.006	0.0152	0.0068	0.2836	0.0156	0.0096	0.012	0.0072	0.0004	0.0172	0.0252		0.0064	0.0172	0.0884	0.0476	0.4024	0.042	0.0596	0.0088	0.0332	0.0096	0.048	0.006	0.0124	0.01	0.0036			0.0396	0.1068	0.0628	0.0012	0.0944	0.026	0.0044	0.0124
0.0032	0.0228	0.0184	0.0196	0.0372	0.0132			0.1076	0.0096	0.0284	0.0016	0.0132	0.0284	0.0052	0.2176	0.0188	0.0244	0.02	0.0252	0.008	0.0152		0.0092	0.064	0.0184	0.0128	0.0016	0.0648	0.0004	0.0108	0.058	0.0468	0.026	0.0128	0.0796	0.0004	0.0092			0.0568	0.028	1.2512	0.0176	0.0104	0.0244	0.1876	0.0216
0.0212	0.1144	0.0128	0.0072	0.9144	0.162			0.0564	0.0012	0.1892	0.1496	0.0004	0.0284	0.0088	0.012	0.0116	0.0128	0.006	0.0104	0.0004	0.0144		0.002	0.0056	0.0308	1.5468	0.0124	0.0056	0.008	0.0136	0.0068	0.0124	0.0164	0.0192	0.0036	0.0104	0.0264			0.0156	0.0068	0.1036	1.3852	0.0212	0.02	0.1124	0.0196
0.0164	0.0388	0.01	0.1312	0.022	0.002			0.0324	0.0388	0.006	8.2076	0.0092	0.026	0.0592	0.0464	0.02	0.022	0.0108	0.0152	0.0176	0.0128		0.0152	0.1016	0.0144	0.002	0.0296	0.1016	0.0004	0.2004	0.0396	0.0124	0.0144	0.0004	0.0056	0.0156	0.0824			0.1004	0.0032	0.0184	0.0056	0.064	0.0052	0.0188	0.0128
0.0044	0.0132	0.0212	0.0184	0.096	0.0132			0.028	0.01	0.0036	0.318	0.0004	2.2676	0.1188	0.008	0.002	0.0052	0.0108	0.0392	0.0604	0.0364		0.0144	0.0112	0.0024	0.0212	0.0484	0.0112	0.0572	0.0412	0.136	0.012	0.0036	0.0312	0.0104	0.0132	0.0052			1.172	0.0016	0.3244	0.0136	0.0092	0.0128	0.0464	0.0896
0.012	0.008	0.0016	0.0144	0.0088	0.0136			0.0252	0.1816	0.0388	0.048	0.1144	4.898	0.152	0.006	0.01	0.008	0.018	0.0176	0.0232	0.0124		0.006	0.5504	0.0388	0.0036	0.0056	0.5504	0.0068	0.2288	0.0036	0.014	0.048	0.022	0.0172	0.0868	0.0088			0.0476	0.5964	0.0004	0.0028	0.0152	0.0496	0.0008	0.1316
0.0236	0.0064	0.0348	0.0064	0.0848	0.0092			0.538	0.2312	0.0328	0.0228	0.0124	0.1492	0.0116	0.0216	0.0124	0.0036	0.0984	0.0036	0.0044	0.0052		0.0248	0.2876	0.0644	0.0008	0.0148	0.2876	0.1296	0.2936	0.0004	0.03	0.0632	0.0016	0.0076	0.0132	0.1608			0.0308	0.096	0.0352	0.0256	0.0028	0.0032	0.006	0.0392
0.2952	0.002	0.0124	0.01	0.0488	0.0156			0.006	0.02	0.006	0.0328	0.0048	0.0004	0.0684	0.0208	0.0116	0.0016	0.0184	0.0248	0.1244	0.0108		0.012	1.8212	0.0872	0.0128	0.0004	1.8212	0.054	0.0092	0.006	0.0508	0.0456	0.0188	0.0608	0.0396	0.0072			0.0388	0.1864	0.2188	0.0204	0.0096	0.0056	0.012	0.064
0.0156	0.0104	0.0156	0.0132	0.052	0.0784			0.4908	0.0012	0.0024	0.1648	0.0292	0.0068	0.018	0.004	0.014	0.0024	0.0104	0.0056	0.0172	0.0164		0.0312	0.0228	0.3708	0.0088	0.014	0.0228	0.032	0.022	0.012	0.008	0.0132	0.0056	0.0068	0.0132	0.0092			0.0692	0.0264	0.0508	0.0004	0.2024	0.0828	0.016	0.038
0.0016	0.0124	0.0088	0.0284	0.0228	0.0108			0.016	0.4212	0.016	0.0124	0.5728	0.0144	0.1556	0.0064	0.0128	0.0096	0.0132	0.0928	0.0088	0.0016		0.0056	0.01	0.0184	0.0092	0.0812	0.0152	0.1472	0.024	0.5092	0.01	0.0068	0.0144	0.012	0.0532	0.0132			0.0344	0.156	0.0376	0.0192	0.0068	0.0956	0.0152	0.0964
0.0604	0.0092	0.1332	0.0384	0.0496	0.008			0.2452	0.1676	0.0332	1.218	0.0292	0.284	0.0296	0.0292	0.0244	0.0108	0.0384	0.0016	0.0032	0.006		0.03	0.012	0.0384	0.0144	0.0092	0.0126	0.0004	0.012	0.0036	0.0104	0.1128	0.0124	0.006	0.0108	0.0108			1.7336	0.0772	0.0024	0.0032	0.0572	0.0016	0.046	0.018
0.098	0.0008	0.042	0.0156	0.01	0.1216			0.5444	0.0684	0.004	0.0288	0.0624	0.3124	0.0144	0.0028	0.3036	0.008	0.0432	0.0008	0.0224	0.0156		0.0328	0.0424	0.0448	0.0632	0.1736	0.016	0.0812	0.0436	0.0256	0.0116	0.0124	0.016	0.0352	0.012	0.0152			0.0072	0.0448	0.0024	0.0004	0.0316	0.0528	0.0676	0.018
0.012	0.0016	0.0076	0.0136	0.2628	0.01			0.0276	0.034	0.0152	0.0224	0.01	0.228	0.0008	0.0184	0.002	0.0096	0.0088	0.0008	0.138	0.0008		0.014	0.0152	0.0728	0.0292	0.0064	0.0152	0.006	0.0576	0.0064	0.012	0.0004	0.0512	0.008	0.0004	0.0368			0.0244	0.0248	0.2096	0.0792	0.0036	0.0284	0.0328	0.0204
0.0156	0.0044	0.04	0.012	0.0368	0.0272			0.1032	0.0588	0.0312	0.0136	0.0036	0.0004	0.0728	0.0032	0.0136	0.0088	0.0096	0.0444	0.0132	0.0124		0.0524	0.0104	0.1332	0.0108	0.0096	0.0104	0.0004	0.0232	0.0116	0.0072	0.0052	0.0236	0.0204	0.0192	0.0112			0.0032	0.0068	0.0208	0.232	0.006	0.0056	0.0072	0.0196
0.0056	0.0884	0.014	0.0316	0.0092	0.0096			0.038	0.192	0.0128	0.0256	0.0072	0.0032	0.0044	0.0236	0.0332	0.0104	0.0156	0.0404	0.0032	0.0148		0.0804	0.114	0.0004	0.0112	0.9528	0.114	0.0004	0.094	0.0016	0.0164	0.0028	0.0108	0.0068	0.052	0.0172			0.0928	0.0096	0.0552	0.0148	0.2916	0.018	0.0016	0.01
0.026	0.01	0.0124	0.0148	0.0336	0.01			0.6504	0.0004	0.0068	0.006	0.0376	0.0148	0.0196	0.0124	0.0132	0.0232	0.0236	0.0072	0.0504	0.0176		0.0056	0.1124	0.0372	0.002	0.0728	0.004	0.0028	0.1144	0.0004	0.0116	0.0148	0.0052	0.0484	0.0096	0.016			0.064	0.0052	0.0016	0.1308	0.0344	0.0012	0.5436	0.012
0.0396	0.0168	0.0008	0.0116	0.0416	0.702			0.1952	0.0004	0.0288	0.0004	0.0284	0.6296	0.0044	0.0032	0.0132	0.012	0.0104	0.0112	0.0556	0.0124		0.0068	0.2132	0.0112	0.0724	0.016	0.2132	0.6216	0.206	0.4476	0.0004	0.0036	0.0124	0.0132	0.0188	0.0108			0.0052	0.0416	0.0892	0.0004	0.0096	0.0208	0.1132	0.2024
0.362	0.0036	0.0132	0.0048	0.0288	0.0216			0.0088	0.2836	0.0148	0.0004	0.2548	0.0148	0.0204	0.0124	0.0312	0.0124	0.0136	0.0072	0.0048	0.044		0.4372	0.018	0.0848	0.0236	0.0452	0.0182	0.0264	0.0396	0.0488	0.0008	0.2276	0.086	0.0116	0.014	0.0112			0.0176	0.1748	0.002	0.0144	0.0292	0.0072	0.024	0.01
0.0084	0.012	0.0036	0.0136	0.0744	0.0152			0.0736	0.152	0.0024	0.1	0.0104	0.0144	0.036	0.0104	0.176	0.0168	0.012	0.0364	0.0188	0.006		0.13	0.0988	0.052	0.08	0.0084	0.0988	0.0132	0.0496	0.0212	0.0128	0.2288	0.0204	0.0004	0.0104	0.0512			0.032	0.0068	0.0084	0.0032	0.2012	0.0316	0.0104	0.018
0.0148	0.018	0.0008	0.0116	0.0168	0.0548			0.0148	0.2328	0.0108	0.0016	0.0236	0.016	0.0076	0.0156	0.026	0.0196	0.0028	0.0036	0.0572	0.024		0.362	0.0016	0.0012	0.0316	0.0004	0.0016	0.0032	0.0572	0.0276	0.01	0.05	0.0072	0.0932	0.0268	0.034			0.0244	0.016	0.6564	0.1804	1.2928	0.0104	0.066	0.0092
0.0144	0.0484	0.044	0.034	0.0108	0.002			0.0488	0.0016	0.002	0.0756	0.0036	0.1772	0.0076	0.0468	0.0628	0.0392	0.0216	0.3144	0.0924	0.0112		0.0068	0.1804	0.0464	0.174	0.0068	0.1804	0.0004	0.0056	0.078	0.0096	0.0708	0.014	0.1256	0.0008	0.0184			0.0616	0.004	0.0948	0.0288	0.0644	0.5012	0.0132	0.014
0.006	0.0004	0.002	0.012	0.0144	0.0128			0.1444	0.016	0.02	0.012	0.658	1.8064	0.0832	0.0648	0.0076	0.0088	0.0416	0.2684	0.0152	0.0044		0.0084	0.2068	0.142	0.0032	0.7324	0.012	0.0004	0.0104	0.0144	0.0156	0.004	0.0116	0.0156	0.01	0.0128			0.0012	0.0056	0.16	0.0004	0.1012	0.018	0.0004	0.0432
0.0008	0.0092	0.0104	0.0148	0.0164	0.0132			0.0284	0.1236	0.0024	0.0112	0.0144	0.3212	0.0352	0.0848	0.0268	0.0032	0.2492	0.0096	0.0092	0.0012		0.1128	0.0344	0.2928	0.4128	0.0024	0.0344	2.7268	0.0284	0.0104	0.0116	0.0012	0.0124	0.0108	0.0164	0.0084			0.0072	0.0604	0.0524	0.6044	0.0564	0.0124	0.0096	0.0756
0.1432	0.0004	0.0124	0.0112	0.0124	0.0236			0.0192	0.04	0.1388	0.0156	0.3232	0.164	0.0256	0.152	0.2456	0.0316	0.0208	0.0144	0.0656	0.1464		0.0532	0.0032	0.4392	0.0112	0.5456	0.0032	0.1404	0.0272	0.0292	0.0164	0.0128	0.01	0.0088	0.0112	0.0384			0.0172	0.0004	0.0684	0.0016	0.0156	0.032	0.0324	0.0148
0.0036	0.0084	0.3144	0.0076	0.0268	0.0072			0.0404	0.04	0.3804	0.0232	0.0144	0.1156	0.0192	0.044	0.0112	0.0168	0.004	0.0084	0.0024	0.0048		0.012	0.1952	0.014	0.0636	0.3576	0.006	28.1908	0.0124	0.0132	0.0136	0.0128	0.0128	0.0084	0.0516	0.016			0.026	0.0836	0.0204	0.0476	0.112	0.0096	0.0172	0.0384
0.0004	0.0128	0.084	0.0564	0.03	0.0148			0.0004	0.0792	0.152	0.1096	0.0088	0.0204	0.018	0.0112	0.0076	0.012	0.01	0.2408	0.0132	0.0132		0.0132	0.0144	0.0004	0.0008	0.1012	0.0144	0.0048	0.096	0.158	0.0136	0.0036	0.0108	0.0096	0.02	0.0132			0.0268	0.0144	0.0464	0.0524	0.0532	0.0024	0.0128	0.0352
0.226	0.0048	0.0104	0.01	0.0008	0.048			0.5656	0.0092	0.006	0.0264	0.012	0.0072	0.0168	0.0556	0.0424	0.0144	0.0644	0.0116	0.0116	0.0004		0.0096	0.2452	0.0696	0.0016	0.2848	0.2452	0.002	0.054	0.0048	0.018	0.008	0.0116	0.0132	0.0108	0.06			0.0164	0.0372	0.0828	0.6832	0.0672	0.02	0.0192	0.0144
0.01	0.0048	0.0112	0.2216	0.0096	0.0168			0.0224	0.0124	0.0176	0.4808	0.03	0.0248	0.0092	0.0104	0.0116	0.026	0.006	0.0044	0.0228	0.0192		0.012	0.1172	0.0044	0.0972	0.832	0.1172	0.0072	0.0576	0.028	0.05	0.0188	0.0124	0.0204	0.02	0.0256			0.072	0.1092	0.034	1.1136	0.148	0.014	0.0072	0.2036
0.0352	0.0632	0.038	0.0124	0.0648	0.0108			0.0172	0.0092	0.1172	0.006	0.0068	0.0392	0.0036	0.214	0.006	0.01	0.0164	0.0084	0.0012	0.0028		0.0424	0.126	0.0096	0.0164	0.1548	0.1266	0.044	0.0112	0.0272	0.0456	0.0004	0.0168	0.0176	0.0416	0.0272			0.0248	0.0272	0.0028	0.0016	0.0128	0.008	1.5372	0.0008
0.0444	0.0004	0.0128	0.0136	0.0132	0.0144			0.0032	0.0552	0.1652	0.1052	0.0728	0.1064	0.0024	0.0156	0.0212	0.0128	0.0052	0.01	0.03	0.0008		0.0068	0.0008	0.0044	0.0028	0.158	0.008	0.052	0.108	0.0124	0.0428	0.0108	0.1828	0.0132	0.0092	0.006			0.038	0.014	0.0068	0.0172	0.0732	0.006	0.0032	0.0136
0.0072	0.0268	0.04	0.0112	0.008	0.03			0.0048	0.0948	0.0032	0.0196	0.0328	0.0056	0.0012	0.0064	0.0476	0.0024	0.0116	0.0012	0.0004	0.012		0.0012	0.1444	0.054	0.0148	0.014	0.1444	0.032	0.228	0.0512	0.066	0.01	0.0436	0.0104	0.0652	0.0412			0.118	0.0044	0.0664	0.0328	0.1404	0.068	0.0264	0.0184
0.0032	0.0848	0.006	0.0264	0.0396	0.04			0.1404	0.1312	0.0116	0.0056	0.0152	0.0008	0.04	0.026	0.0016	0.0228	0.0004	0.0704	0.0016	0.008		0.0128	0.05	0.066	0.0144	0.2304	0.0536	0.1148	0.0048	0.0128	0.0176	0.01	0.01	0.0776	0.0076	0.0168			0.5208	0.0012	0.0056	1.662	0.0084	0.0212	0.0708	0.1084
0.0072	0.0404	0.0128	0.0048	0.0152	0.018			0.1252	0.0052	0.01	0.0752	0.0076	0.0056	0.0116	0.1668	0.02	0.0192	0.0232	0.0076	0.0456	0.0128		0.002	0.014	0.7344	0.018	0.1516	0.0142	0.0296	0.0072	0.158	0.0172	0.0004	0.0124	0.014	0.0516	0.0156			0.6848	0.0144	8.1628	0.3056	0.0136	0.008	0.006	0.162
0.0936	0.002	0.0108	0.1808	0.0112	0.0464			0.0276	0.0056	0.0672	0.0468	0.0196	0.1528	0.0184	0.1096	0.0132	0.01	0.0072	0.014	0.0072	0.0068		0.0196	0.0104	0.008	0.0048	0.0104	0.0104	0.1408	0.0164	0.0128	0.012	0.0572	0.0132	0.0376	0.0192	0.0444			0.0028	0.0252	0.0064	0.0008	0.1316	0.016	0.0492	0.2112
0.0712	0.0312	0.0064	0.0284	0.044	0.0132			0.0108	0.0332	0.0812	0.0064	0.3464	0.7192	0.1244	0.0248	0.0112	0.0096	0.0128	0.0132	0.012	0.0024		0.0344	0.0248	0.0152	0.0212	0.54	0.0248	0.0252	0.0276	0.0768	0.0132	0.0196	0.018	0.0128	0.0136	0.0632			0.1948	0.0252	0.0228	0.714	0.3196	0.0104	0.3932	0.0004
0.0732	0.0116	0.0112	0.0128	0.0248	0.0044			0.0624	0.1116	0.0404	0.0204	0.0224	0.0032	0.0292	0.038	0.0044	0.0184	0.0108	0.02	0.0016	0.0572		0.0216	0.0088	0.07	0.0876	0.0368	0.0088	0.2968	0.0204	0.0128	0.0108	0.0124	0.0176	0.0132	0.0064	0.012			0.0472	0.0332	0.0668	0.0552	0.0012	0.0048	0.0524	0.0124
0.034	0.0204	0.1344	0.0144	0.0004	0.0256			0.3376	2.2228	0.0748	0.2032	0.0212	0.0132	0.0916	0.0156	0.038	0.0096	0.018	0.0112	0.0008	0.0052		0.0328	0.6532	0.0132	0.044	0.0104	0.6532	0.0116	0.0384	0.0008	0.0152	0.016	0.1176	0.0052	0.0128	0.0476			0.076	0.0024	0.02	0.0092	0.0056	0.006	0.2444	0.0096
0.0016	0.0228	0.012	0.028	0.0048	0.0132			0.0316	0.0452	0.0076	0.0096	0.0096	0.0024	0.1868	0.0096	0.01	0.0076	0.01	0.0096	0.1904	0.0136		0.0164	0.0104	0.3984	0.0192	0.0524	0.058	0.2976	0.5776	0.028	0.0192	0.006	0.0156	0.0116	0.17	0.0148			0.3636	0.0168	0.0004	0.0064	0.1412	0.0152	0.0312	0.0284
0.008	0.0096	0.0024	0.0072	0.01	0.0076			0.2412	0.1992	0.0236	0.406	0.004	0.1504	0.026	0.0144	0.0208	0.0132	0.0232	0.0128	0.0128	0.0108		0.0192	0.0008	0.0524	0.09	0.272	0.0008	0.1416	0.8736	0.0736	0.0048	0.0376	0.0196	0.0112	0.01	0.0124			0.0656	0.014	0.2368	0.0076	0.0052	0.0016	0.0004	0.0184
0.0244	0.002	0.0164	0.0096	0.012	0.0932			0.0876	0.0116	0.0032	0.0044	0.0024	0.0064	0.0048	0.002	0.0004	0.0304	0.0444	0.0024	0.0036	0.0112		0.0124	0.008	0.006	0.0204	0.1252	0.0082	0.5572	0.0128	0.0048	0.0004	0.0156	0.0116	0.012	0.0436	0.0172			0.0124	0.0096	0.1208	0.0004	0.0268	0.01	0.0236	0.0076
0.0384	0.0104	0.0712	0.0056	0.0408	0.0056			0.0468	0.422	0.0148	0.0268	0.0104	0.0476	0.0116	0.0016	0.0072	0.0188	0.0192	0.0216	0.0128	0.0012		0.0548	0.014	0.0056	0.0192	0.1396	0.0142	0.0056	0.32	15.6664	0.0128	0.0132	0.0128	0.0088	0.0376	0.0268			1.158	0.0004	0.0756	0.0004	0.0256	0.014	0.064	0.016
0.012	0.0104	0.0056	0.01	0.0688	0.0044			0.8556	0.022	0.0476	0.054	0.0008	0.01	0.0124	0.0116	0.0208	0.0016	0.026	0.0024	0.1908	0.0024		0.2056	0.05	0.0124	0.0152	0.0776	0.0516	0.0088	0.2852	0.15	0.0108	0.0352	0.0368	0.0252	0.0032	0.0132			0.0096	0.2768	0.1772	0.0032	0.0636	0.5488	0.0184	0.052
0.0012	0.0108	0.0632	0.012	0.004	0.0156			0.1148	0.0992	0.1976	0.2128	0.1392	0.0316	0.0024	0.0256	0.014	0.0088	0.0336	0.0004	0.0948	0.018		0.0072	0.0032	0.3532	0.012	0.0812	0.0032	0.0436	0.0208	0.0084	0.0072	0.004	0.0224	0.0036	0.064	0.0056			0.1536	0.0604	0.312	0.0044	0.0032	0.0192	0.012	2.0572
0.0024	0.0164	0.0008	0.016	0.0592	0.0108			0.0408	0.0656	0.0028	0.018	0.0184	0.1472	0.0148	0.0236	0.0092	0.0284	0.1188	0.0264	0.328	0.0048		0.0052	0.0528	0.0448	0.052	0.0876	0.034	0.0052	0.0068	0.0032	0.0132	0.0112	0.0072	0.0008	0.0288	0.0448			0.0012	0.04	0.3908	0.0056	0.0008	0.0624	0.0128	0.894
0.0844	0.0024	0.008	0.0188	0.0136	0.0144			0.0348	0.0056	0.1216	0.0052	0.4572	0.0096	0.036	0.0292	0.0284	0.014	0.0052	0.0084	0.0008	0.0148		0.0048	0.0416	0.0296	0.0168	0.0004	0.0416	0.016	0.0408	0.144	0.01	0.2688	0.0096	0.0152	0.0196	0.0004			0.02	0.0264	0.0288	0.0132	0.0332	0.0176	0.0128	0.02
0.1244	0.0948	0.0092	0.0104	0.1408	0.0116			0.0024	0.0384	0.008	0.0032	0.0204	0.0164	0.0144	0.026	0.0156	0.0132	0.0156	0.0256	0.0004	0.0232		0.29	0.0056	0.4896	0.0572	0.0308	0.0056	0.1696	0.036	0.0024	1.3984	0.226	0.0296	0.0132	0.0204	0.0252			0.024	0.0144	3.0948	0.6292	0.014	0.0216	0.1504	0.0592
0.4604	0.0172	0.0576	0.0096	0.0076	0.0148			0.0004	0.04	0.0008	0.0336	0.0632	0.0156	0.024	0.0744	0.006	0.0176	0.0668	0.014	0.0168	0.0268		0.1736	0.5964	0.0076	0.0872	0.0072	0.5964	0.0048	0.0272	0.0696	0.0084	0.0632	0.0532	0.0232	0.0172	0.0068			0.206	0.0144	0.0008	0.0036	0.002	0.0452	0.0092	0.1756
0.0088	0.0144	0.01	0.0312	0.0116	0.1432			0.3068	0.0676	0.0132	0.0732	0.0228	0.01	0.0508	0.0224	0.0008	0.0104	0.0064	0.01	0.012	0.058		0.002	0.0144	0.0068	0.0492	0.0008	0.0144	0.0552	0.1032	0.0172	0.0116	0.0088	0.0164	0.1212	0.0204	0.016			0.0076	0.2008	0.0584	0.0052	0.1692	0.1688	0.0128	0.0152
0.0056	0.0032	0.0276	0.0084	0.0172	0.0192			0.0004	0.0208	0.012	0.0168	0.0188	0.026	0.0208	0.004	0.0124	0.0168	0.0128	0.0372	0.2528	0.0284		0.036	0.0032	0.006	0.0024	0.0504	0.0032	0.0036	0.0112	0.0176	0.0128	0.0248	0.0328	0.0108	0.0096	0.0096			0.1188	0.0544	0.0492	0.0064	0.0196	0.17	0.0268	0.0852
0.0192	0.0552	0.0032	0.0168	0.0004	0.0452			0.1604	0.0708	0.02	0.0016	0.102	0.0924	0.01	0.022	0.012	0.0088	0.0212	0.018	0.0292	0.01		0.0024	0.084	0.0448	0.038	0.3468	0.0844	0.0792	0.0172	0.0216	0.0012	0.006	0.0116	0.0072	0.0336	0.0264			0.0264	0.0056	0.0524	0.0112	0.0236	0.026	0.0016	0.0656
0.1392	0.0156	0.028	0.0092	0.018	0.0112			0.2044	0.0136	0.0672	0.0024	0.0008	0.01	0.016	0.0008	0.022	0.0844	0.0144	0.0112	0.1	0.0128		0.0124	0.0012	0.0292	0.0488	0.3764	0.008	0.0028	0.9592	0.0336	0.016	0.0136	0.0364	0.0068	0.0276	0.0236			0.024	0.0528	0.1064	0.0028	0.0496	0.0024	0.5052	0.0152
0.002	0.0052	0.0112	0.0144	0.0052	0.0032			0.0004	3.9596	0.002	0.0164	0.0004	0.0032	0.014	0.0592	0.0152	0.0112	0.068	0.0204	0.0272	0.0144		0.0124	0.0084	0.004	0.0396	0.2156	0.0084	0.0632	0.0272	0.0364	0.2956	0.0028	0.008	0.0032	0.0148	0.0992			0.0236	0.0304	0.002	0.0556	0.1992	0.0008	0.0452	0.018
0.0248	0.0488	0.0072	0.028	0.0112	0.0104			0.0064	0.0036	0.0288	0.0856	0.0084	0.0028	0.2092	0.2548	0.0076	0.0148	0.018	0.006	0.0076	0.0216		0.0024	0.0044	0.0412	0.006	0.0724	0.024	0.144	0.0024	0.0052	0.01	0.014	0.0092	0.0144	0.0148	0.0568			0.1768	0.0152	0.0456	0.0076	0.0072	0.0084	0.0088	0.0288
0.0204	0.0128	0.0084	0.012	0.0012	0.0136			0.0016	0.1984	0.0824	0.0008	0.0084	0.1116	0.0104	0.0192	0.0124	0.0296	0.0144	0.016	0.0568	0.0028		0.0164	0.0104	0.0092	0.1404	0.0192	0.0104	0.0268	0.0148	0.0004	0.0352	0.0256	0.0132	0.0112	0.0128	0.016			0.3032	0.0216	0.0036	0.0108	0.0396	0.0624	0.0104	0.0164
0.0012	0.0192	0.026	0.0068	0.0136	0.0012			0.1032	0.3052	0.0296	0.0012	0.0048	0.0384	0.0064	2.1508	0.0112	0.0204	0.0844	0.0288	0.0092	0.0252		0.046	0.0048	0.002	0.0096	0.0432	0.0048	0.0112	0.0232	0.0124	0.0112	0.0016	0.0448	0.0248	0.0128	0.0108			0.0088	0.0528	0.0388	0.0048	0.0264	7.5444	0.036	0.0296
0.038	0.0112	0.0012	0.0124	0.004	0.02			0.0004	0.0388	0.0096	0.092	0.008	0.1016	0.0396	0.002	0.0148	0.0028	0.0144	0.0252	0.0128	0.0468		0.0328	0.0088	0.0224	0.1312	5.8848	0.0088	0.1048	0.0004	0.0604	0.0044	0.06	0.0096	0.0168	0.0012	0.0004			0.814	0.0984	0.0092	0.0032	0.0116	0.0004	0.0044	0.0388
0.0164	0.0104	0.0104	0.0092	0.0004	0.01			0.0236	0.0132	0.058	0.0016	0.0116	0.2776	0.0104	0.096	0.0248	0.02	0.136	0.0112	0.0244	0.0352		0.028	0.1128	0.0228	0.012	0.822	0.1128	0.8572	0.0152	0.0072	0.0128	0.0144	0.048	0.0232	0.002	0.008			0.0052	0.0192	0.0108	0.0092	0.0048	0.0908	0.0172	0.0016
0.0292	0.0472	0.0676	0.0156	0.3736	0.0144			0.2284	0.0376	0.0016	1.0568	0.0008	0.0284	0.0016	0.1008	0.2592	0.0052	0.0012	0.0496	0.0036	0.0128		0.006	0.014	0.1272	0.0432	0.0984	0.0144	0.1708	0.0212	0.0184	0.0008	0.1864	0.0796	0.0308	0.0124	0.0316			0.0084	0.016	0.0264	0.0036	0.0208	0.0244	0.022	0.0224
0.0136	0.0316	0.0172	0.016	0.0712	0.0464			0.0048	0.6216	0.124	0.0172	0.0224	0.2796	0.082	0.0172	0.0724	0.036	0.048	0.0096	0.0004	0.1068		0.01	0.024	0.3912	0.0116	0.028	0.0246	0.032	0.51	0.034	0.0116	0.0124	0.016	0.0276	0.0124	0.0184			0.006	0.0048	1.084	0.0012	0.0748	0.018	0.1336	0.0156
0.0168	0.012	0.002	0.0304	0.0044	0.0188			0.0672	1.6532	0.0088	0.0192	0.116	0.0032	0.0172	0.0144	0.0096	0.012	0.032	0.1148	0.0464	0.0348		0.0268	0.3036	0.0124	0.0696	0.034	0.134	0.684	0.0008	0.0156	0.0148	0.01	0.012	0.008	0.01	0.002			0.0012	0.058	0.2048	0.6192	0.0152	0.0376	0.1032	0.0032
0.012	0.0116	0.0176	0.014	0.01	0.0612			0.0088	0.0252	0.034	0.0216	0.0012	0.0024	0.0132	0.0352	0.0048	0.0028	0.0104	0.03	0.0188	0.0148		0.018	0.004	0.0328	0.0156	0.016	0.0046	0.0064	0.0092	0.012	0.01	0.0088	0.0156	0.0552	0.014	0.0072			0.04	0.08	0.2604	0.0052	0.0108	0.0076	0.0388	1.3644
0.0564	0.012	0.014	0.0156	0.0052	0.0268			0.0184	0.0052	0.038	0.3336	0.0112	0.0088	0.0504	0.004	0.23	0.01	0.0096	0.0168	0.0004	0.0148		0.0008	0.026	0.0124	0.0256	0.0084	0.0266	0.1916	0.0168	0.0032	0.0204	0.044	0.0216	0.0096	0.06	0.042			0.0044	0.182	0.0008	2.4136	13.1624	0.0112	0.01	0.0072
0.0088	0.0104	0.0104	0.0124	0.022	0.002			0.1528	0.046	0.0284	2.2408	0.0684	0.6832	0.2004	0.0792	0.0176	0.0092	0.0124	0.0144	0.0288	0.0116		0.0568	0.0628	0.0384	0.0168	0.0012	0.048	0.004	0.0152	0.1192	0.0092	0.0136	0.0096	0.0336	0.0076	0.0384			0.1076	0.0864	0.0012	0.064	0.0384	6.4456	0.02	0.0344
0.0092	0.0264	0.0028	0.018	0.01	0.012			0.002	0.0796	0.0044	1.6736	0.014	0.0416	0.014	0.0148	0.0112	0.0128	0.0024	0.014	0.0072	0.318		0.05	0.0948	0.016	0.3356	0.0736	0.002	0.1596	0.2872	0.0784	0.0176	0.0124	0.0128	0.052	0.022	0.0024			0.0448	0.006	0.0084	1.6344	0.0144	12.5996	0.002	0.0164
0.0104	0.0032	0.0172	0.006	0.1908	0.0224			0.0016	0.0132	0.004	0.01	0.0096	0.006	0.0064	0.0464	0.0128	0.0192	0.0168	0.0124	0.0144	0.0144		0.0052	0.02	0.1152	0.0048	0.0204	0.0212	0.0864	0.01	0.0188	0.0428	0.0588	0.0036	0.0096	0.0216	0.02			0.0104	0.0232	0.0496	0.0576	0.052	0.0004	0.0008	0.0304
0.0408	0.0128	0.054	0.0104	0.0068	0.0104			0.444	0.0288	0.0068	0.0016	0.0444	0.0152	0.0072	0.0132	0.0412	0.0112	0.0232	0.038	0.0064	0.006		0.014	0.3012	0.0204	0.2748	0.0488	0.3012	0.2832	0.0016	0.0044	0.0112	0.3172	0.0144	0.036	0.0332	0.0224			0.0004	0.0028	0.038	0.0048	0.1668	0.0132	0.0176	0.034
0.0016	0.0112	0.0192	0.01	0.0904	0.0456			0.026	0.0016	0.0196	0.1336	0.0152	0.3192	0.0452	0.0344	0.0076	0.0168	0.0264	0.0112	0.0416	0.0088		0.0152	0.0176	0.3768	0.088	0.0064	0.0176	0.5876	0.2924	0.0092	0.0116	0.0016	0.0056	0.0132	0.0116	0.3336			0.0004	0.0024	0.0008	0.0784	0.0132	0.0452	0.002	0.0968
0.2968	0.0188	0.1072	0.0176	0.0092	0.0116			0.0004	7.0476	1.0564	0.096	0.0092	0.0604	0.126	0.0032	0.1032	0.0192	0.0252	0.0188	0.01	0.01		0.0112	0.4684	0.47	0.1176	0.1032	0.4684	0.1056	0.028	0.0484	0.012	0.0036	0.0132	0.0128	0.0488	0.0064			0.0652	0.0056	0.0604	10.3464	0.0132	0.0036	0.0104	0.0156
0.0004	0.0076	0.0128	0.0164	0.044	0.01			0.03	3.5644	0.1272	0.0208	0.0236	0.0572	0.0184	0.0056	0.006	0.0092	0.0268	0.246	0.0528	0.0092		0.0128	0.0028	0.026	0.0852	0.0288	0.338	0.0008	0.0136	0.01	0.01	0.0112	0.016	0.0028	0.01	0.032			0.0004	0.0536	0.0424	0.0004	0.0084	0.0224	0.0248	0.0116
0.0004	0.0028	0.1164	0.01	0.0236	0.0152			0.2436	0.0084	0.0004	0.128	5.402	0.0544	0.0084	0.0244	0.0104	0.0228	0.0532	0.0012	0.01	0.0116		0.02	0.052	0.0564	0.0076	0.0064	0.052	0.048	0.0032	0.0408	0.0148	0.024	0.016	0.1964	0.0152	0.0152			0.0112	0.0204	2.6016	0.0036	0.0376	0.0152	0.0272	0.0168
0.0148	0.0324	0.0432	0.0104	0.0088	0.0276			0.0068	0.002	0.0036	0.0764	0.1844	0.0228	0.0208	0.0208	0.0116	0.0052	0.0132	0.014	0.0016	0.0104		0.0128	0.4172	0.0008	0.0044	0.0076	0.008	0.0092	0.0124	0.0004	0.0104	0.0052	0.0036	0.0004	0.0056	0.0108			0.0148	0.0012	0.0168	0.0136	0.0072	0.0052	0.0028	0.0192
0.0008	0.0048	0.006	0.01	0.0616	0.0088			0.034	0.0008	0.0008	0.0012	0.0328	0.032	0.0632	0.016	0.03	0.0132	0.0136	0.0468	0.0136	0.0104		1.1096	0.0804	0.004	0.0128	0.0024	0.0804	0.2456	0.0644	0.0096	0.012	0.0184	0.0108	0.0092	0.0192	0.0096			0.7808	0.0356	0.0044	0.008	0.0724	0.028	0.0144	0.01
0.026	0.012	0.0096	0.0276	0.0028	0.018			0.054	0.0008	0.014	0.052	0.2216	0.028	0.0184	0.0188	0.0128	0.01	0.0008	0.0092	0.028	0.012		0.0092	0.0308	0.0444	0.0164	0.0044	0.0308	3.708	0.0156	0.0148	0.0136	0.016	0.0316	0.0132	0.0112	0.004			0.0248	0.0112	0.0048	0.0176	0.0124	0.076	0.0236	0.0116
0.0108	0.0216	0.0008	0.032	0.0344	0.0476			0.0096	0.0048	0.0016	0.0748	0.0176	0.0004	0.0056	0.01	0.0784	0.0232	0.0004	0.0736	0.0744	0.0124		0.0148	0.6068	0.1504	0.0196	0.0572	0.6068	0.0408	0.2988	0.0132	0.0252	0.7768	0.002	0.0128	0.0232	0.0004			0.1492	0.0168	0.314	0.0452	0.002	0.0464	0.0132	0.2008
0.0828	0.0156	0.0096	0.0288	0.0124	0.0172			0.4244	0.0124	0.0132	0.106	0.0112	0.238	0.0824	0.0368	0.0172	0.0108	0.0244	0.0292	0.0292	0.0064		0.01	0.0016	0.0028	0.0032	0.0072	0.0016	0.0008	0.0368	0.0012	0.2084	0.0156	0.0132	0.01	0.0144	0.0676			0.0004	0.4144	0.056	0.2368	0.0472	0.022	0.0032	0.012
0.0952	0.0188	0.0408	0.0252	0.0672	0.0504			0.1744	0.0032	0.0328	0.0256	0.2888	0.0172	0.0968	0.0124	0.0092	0.0076	0.0508	0.0148	0.0464	0.01		0.0176	0.0992	0.0072	0.0084	0.0872	0.0992	0.0152	0.0184	0.0704	0.028	0.03	0.02	0.0052	0.0068	0.0148			0.4264	0.0248	0.0288	0.0024	0.0128	0.028	0.0116	1.5908
0.0516	0.0088	0.0096	0.016	0.0148	0.0116			0.1436	0.0148	0.0268	0.09	0.0124	0.0036	0.0024	3.3224	0.0452	0.0124	0.0156	0.01	0.0184	0.0112		0.0444	0.0072	0.4848	0.6216	0.0008	0.0072	0.008	0.1632	0.0128	0.0164	0.0164	0.0148	0.0304	0.0156	0.0108			0.0016	0.0096	0.3192	0.02	0.0116	0.0052	0.0188	0.0056
0.0048	0.0008	0.0088	0.0028	0.0036	0.0096			0.0028	0.0348	0.6272	0.0024	0.8248	0.4288	0.0104	0.008	0.0192	0.0144	0.012	0.008	0.0076	0.022		0.3328	0.2456	0.0072	0.0396	0.0008	0.006	0.0132	0.0096	0.0008	0.01	0.004	0.0196	0.012	0.0052	0.0136			0.0124	0.0264	0.022	0.03	0.002	0.0292	0.0236	0.1936
0.0288	0.0012	0.014	0.002	0.0072	0.02			0.0008	0.0436	0.0024	0.0244	0.0664	0.0032	0.03	0.2696	0.004	0.0188	0.0032	0.0304	0.0456	0.0068		0.0168	0.0876	0.0152	0.0436	0.0936	0.0876	0.0032	0.088	0.0116	0.0128	0.0084	0.0116	0.0232	0.0204	0.8048			2.6912	0.0136	0.4316	0.0068	0.1004	0.0228	0.0176	0.0044
0.0188	0.0056	0.0004	0.0124	0.0096	0.0524			0.0028	0.1088	0.0828	0.0232	0.0064	0.0068	3.0424	0.0064	0.0164	0.03	0.0332	0.0488	0.006	0.0048		0.0196	0.0064	0.0044	0.13	0.094	0.052	0.0432	0.0128	0.01	0.0032	0.0096	0.0088	0.03	0.0888	0.0116			0.0292	0.0104	0.0264	0.0168	0.0708	0.0008	0.0272	0.0132
0.0132	0.0292	0.0136	0.01	0.064	0.0156			0.0168	0.1288	0.0128	0.0132	0.0752	0.01	0.016	0.0052	0.026	0.02	0.0056	0.1112	0.0324	0.0116		0.0124	0.0128	0.1072	0.0236	0.0024	0.032	0.0036	0.4764	0.0184	0.0068	0.0116	0.0292	0.0056	0.0276	0.0012			0.0016	0.5196	0.162	0.0024	0.0068	0.0072	0.0572	0.1376
0.0136	0.0292	0.0068	0.0356	0.004	0.0084			0.0024	0.0104	0.0208	0.4176	0.0124	0.1492	0.0128	0.0124	0.0132	0.012	0.0124	0.0008	0.042	0.0032		0.012	0.032	0.0176	0.0324	0.0028	0.0328	0.0608	0.0196	0.0128	0.0124	0.1572	0.0128	0.0084	0.0384	0.0308			0.0312	0.002	0.0196	0.022	0.0236	0.0016	0.0004	0.0036
0.0144	0.0336	0.002	0.0192	0.012	0.0088			0.0048	0.0008	0.0088	0.106	0.0032	0.0104	0.0072	0.0356	0.0032	0.004	0.0024	0.0088	0.016	0.0088		0.0108	1.7484	0.032	0.0048	0.0312	0.2	0.0152	0.1484	0.02	0.0324	0.0188	0.0076	0.0176	0.0168	0.0004			0.0144	0.0176	0.0084	0.012	0.0016	0.0128	0.0116	0.0168
0.0084	0.0024	0.0028	0.0112	0.052	0.048			0.0668	0.0204	0.0632	0.0116	0.0068	0.0004	0.0124	0.0132	0.2332	0.0144	0.0504	0.0296	0.0004	0.0196		0.0312	0.038	0.0024	0.1564	0.0004	0.0388	0.0404	0.0156	0.0124	0.008	0.016	0.0184	0.0136	0.0288	0.0844			0.0088	0.0188	0.0188	0.1096	0.0776	0.0076	0.134	0.0396
0.0128	0.0104	0.0244	0.004	0.0064	0.0112			0.6488	0.0104	0.3588	0.0604	0.3196	0.0272	0.0088	0.0492	0.0184	0.0204	0.008	0.0104	0.0136	0.006		0.0116	0.0088	0.0112	0.1104	0.1424	0.0088	0.0076	0.0016	0.01	0.0148	0.1132	0.0136	0.0148	0.1384	0.0396			0.0112	0.0848	0.0036	0.0048	0.012	0.0244	0.02	0.022
0.0008	0.0136	0.2152	0.0096	0.1584	0.0192			0.006	0.0276	0.0792	0.0268	0.2996	0.0528	0.1168	0.0148	0.006	0.0096	0.01	0.0092	0.0044	0.0008		0.0312	0.0092	0.19	0.0748	0.1516	0.0092	0.0484	0.216	0.1892	0.018	0.0248	0.0264	0.0268	0.0212	0.142			0.0088	0.0148	0.0724	0.0068	0.0172	0.002	0.0176	0.0068
0.0056	0.0112	0.0096	0.0204	0.0976	0.0008			0.0012	0.0288	0.008	0.0044	0.002	0.0068	0.0424	0.0288	0.0348	0.024	0.0252	0.1572	0.0104	0.0324		0.116	0.0044	0.0148	0.3176	0.0084	0.06	0.678	0.0024	0.0264	0.0156	0.0668	0.012	0.012	0.0116	0.0192			0.0368	0.0076	0.0092	0.0184	0.5356	0.012	0.0132	0.0004
0.0012	0.0132	0.0116	0.0048	0.0248	0.012			0.0088	0.0304	0.0088	0.0592	0.0028	0.0228	0.9188	0.0224	0.0232	0.0136	0.016	0.0108	0.268	0.0132		0.0124	0.0084	0.014	0.0848	0.0048	0.0084	0.1696	0.0744	0.0076	0.0212	0.0052	0.0104	0.008	0.0136	0.058			0.1184	0.0232	0.022	0.0056	0.024	0.3124	0.0128	0.016
0.0248	0.0124	0.01	0.0616	0.008	0.004			0.004	0.706	0.0088	0.0048	0.022	0.0072	0.0112	0.0208	0.01	0.0024	0.0124	0.0264	0.0116	0.01		0.002	0.0244	0.0032	0.0148	0.0208	0.006	0.026	0.0124	0.014	0.012	0.0168	0.0828	0.0036	0.0056	0.0528			0.0104	0.0148	0.0472	0.0336	1.9472	0.144	0.0224	0.0104
0.042	0.0004	0.0116	0.0188	0.0004	0.0992			0.0608	0.0016	0.0064	0.0068	0.0324	0.0408	0.024	0.0284	0.016	0.0152	0.0112	0.018	0.0136	0.0196		0.0236	0.1504	0.002	0.012	0.0204	0.1504	0.0192	0.016	0.0156	0.0176	0.01	0.0404	0.006	0.0328	0.0104			0.706	0.0756	0.008	0.0172	0.9452	0.178	0.01	0.0304
0.0536	0.0028	0.008	0.0068	0.0376	0.0508			0.2104	0.0016	0.0156	0.1608	0.002	0.0396	0.0324	0.01	0.0028	0.0132	0.012	0.0188	0.0068	0.0032		0.004	0.0204	0.074	0.0312	0.3424	0.0204	0.0004	0.0008	0.1772	0.0164	0.0116	0.0224	0.0316	0.0032	0.0248			0.016	0.1288	0.0052	0.0132	0.0056	0.0856	0.0168	0.0124
0.0308	0.0004	0.0028	0.008	0.006	0.01			0.0016	0.316	0.0172	0.0068	0.006	0.0176	0.0248	0.0056	0.0544	0.0508	0.0016	0.0176	0.0104	0.0048		0.0032	0.0656	0.0584	0.0016	0.0024	0.0656	0.016	0.0196	0.0068	0.018	0.0448	0.014	0.0104	0.0144	0.0008			0.0004	0.008	0.0068	0.0196	0.0332	0.1244	0.0004	0.1616
0.0084	0.012	0.0184	0.0076	0.0344	0.002			0.0168	0.0036	0.0064	0.0028	0.0208	0.0868	0.0072	0.0008	0.0092	0.0096	0.0684	0.0236	0.0076	0.0088		0.226	0.026	0.0096	0.0196	0.212	0.0264	0.0356	0.0208	0.0344	0.0004	0.03	0.0104	0.0096	0.1108	0.0088			0.0136	0.0132	0.0004	0.0136	0.0084	0.142	0.0064	0.072
0.0124	0.0052	0.0032	0.0424	0.0024	0.0008			0.2376	0.4556	0.0132	0.0276	0.4696	0.0308	0.0616	0.0132	0.0124	0.0156	0.02	0.0024	0.0568	0.0896		0.0404	0.0448	0.0116	0.0012	0.0148	0.0448	0.0028	0.7744	0.3812	0.0064	0.0024	0.0044	0.0148	0.0192	0.0156			1.1252	0.0696	0.0196	0.032	0.0096	0.3364	0.0104	0.0028
0.0196	0.0032	0.0144	0.0416	0.1736	0.0204			0.0004	0.0144	0.0224	0.0472	0.0032	0.0004	0.298	0.0236	0.0132	0.0136	0.0372	0.244	0.0136	0.018		0.0128	0.0068	0.002	0.0024	0.0096	0.0068	0.7828	0.0444	0.0396	0.024	0.0204	0.0264	0.0032	0.0104	0.0016			0.002	0.0292	0.0148	0.012	0.006	0.0632	0.0128	0.0216
0.0088	0.0184	0.016	0.0228	0.0128	0.0312			0.052	0.02	0.0008	0.0024	0.014	0.1568	0.0548	0.0468	0.152	0.016	0.0064	0.008	0.1584	0.0044		0.0036	0.0384	0.0048	0.014	0.092	0.0384	0.0084	0.0172	0.0112	0.0104	0.0252	0.0104	0.0824	0.0032	0.016			0.0024	0.0304	0.0008	0.3152	0.0116	0.006	0.01	0.0132
0.0464	0.0328	0.002	0.0012	0.1332	0.012			2.2084	0.0084	0.022	0.1092	0.0172	0.0152	0.8056	0.04	0.2204	0.0128	0.0304	0.016	0.0308	0.0208		0.0396	0.0132	0.0092	0.04	0.0004	0.016	0.0036	0.1336	0.012	0.0972	0.0464	0.132	0.0212	0.0196	0.0168			0.0036	0.0116	0.0536	0.028	0.0268	0.0108	0.0924	0.0156
0.1592	0.002	0.0128	0.0076	0.0456	0.0008			0.0064	0.0184	0.1768	0.002	1.0816	0.0136	0.0196	0.0292	0.0328	0.0152	0.0204	0.012	0.0648	0.028		0.0028	0.048	0.0024	0.122	0.004	0.0484	0.0128	0.0036	0.0164	0.0284	0.0112	0.0116	0.0212	0.02	0.1636			0.0048	0.9424	0.0048	0.004	0.0184	0.0104	0.0228	0.014
0.0244	0.008	0.01	0.0128	0.0936	0.2428			0.0972	0.0024	0.002	0.0284	0.112	0.0404	0.0296	0.012	0.006	0.012	0.172	0.0204	0.0332	0.0156		0.08	0.3148	0.0076	0.0096	0.0292	0.3148	0.006	0.038	0.0128	0.0184	0.0364	0.0072	0.0152	0.0144	0.0088			1.1612	0.0016	0.018	0.0412	0.0184	7.014	0.0416	0.012
0.0492	0.018	0.0108	0.0068	0.0408	0.018			0.0096	0.0132	0.056	0.0092	0.0088	0.1272	0.0128	0.0116	0.0116	0.0148	0.0148	0.0252	0.1396	0.0128		0.3144	0.3588	0.0032	0.0108	0.0224	0.024	0.0056	0.0024	0.0188	0.0128	0.012	0.0028	0.0212	0.0136	0.0132			0.006	0.0336	0.0104	0.092	0.0016	0.01	0.066	0.0144
0.0004	0.0108	0.1236	0.018	0.0576	0.0136			0.0084	1.406	0.0448	0.016	0.0112	0.0176	0.0096	0.0348	0.004	0.0724	0.0112	0.01	0.0104	0.0128		0.0064	0.0044	0.0024	0.038	1.2732	0.0044	0.0124	0.0864	0.0116	0.0028	0.0136	0.038	0.2144	0.0368	0.2036			0.0352	0.0004	0.086	0.0352	0.0532	0.0044	0.0228	0.0588
0.0004	0.0072	0.0052	0.0016	0.0184	0.0392			0.038	0.0004	0.0104	0.0172	0.0548	0.0088	0.0124	0.0152	0.0108	0.0476	0.0356	0.0192	0.002	0.024		0.0032	0.036	0.0184	0.006	0.0312	0.036	0.0044	0.2272	0.0256	0.2296	0.0168	0.0104	0.0044	0.0332	0.0104			0.2412	0.0604	0.2916	0.0116	0.0976	0.0104	0.0116	0.0004
0.1008	0.0148	0.0052	0.0444	0.138	0.012			0.0124	0.0024	0.2628	0.03	0.0144	0.5872	0.2532	0.0124	0.008	0.0188	0.006	0.0008	0.1168	0.0064		0.0136	0.4808	0.0272	0.1908	0.06	0.4808	0.0404	0.0072	0.01	0.0232	0.0476	0.0096	0.0072	0.0096	0.0804			0.042	0.034	0.0008	0.0272	0.0096	0.0104	0.0008	0.974
0.0148	0.0424	0.01	0.0024	0.0188	0.0004			0.0364	0.0344	0.0172	0.0032	0.082	0.458	0.0088	0.0076	0.0728	0.0056	0.0016	0.0088	0.004	0.0056		0.022	0.0628	0.0652	0.0148	0.01	0.016	0.002	0.006	0.0332	0.0344	0.0132	0.0032	0.0092	0.0128	0.2544			0.0544	0.06	0.0088	0.0028	0.092	0.4528	0.1736	0.0284
0.0792	0.0052	0.0156	0.016	0.0412	0.0344			0.0752	0.0164	0.0196	0.1504	0.0024	0.0064	0.0048	0.0228	0.1712	0.01	0.0236	0.0208	0.0176	0.006		0.0516	0.0092	0.0068	0.0056	0.0428	0.0092	1.0584	0.034	0.01	0.0144	0.0068	0.0108	0.0124	0.0136	0.0964			0.9532	0.0384	0.0164	0.0084	0.01	0.0728	0.1072	0.0148
0.3512	0.0184	0.0224	0.1992	0.01	0.0172			0.0012	0.1908	0.0196	0.016	0.0016	0.0248	0.0124	0.0176	0.006	0.0128	0.0104	0.0136	0.0444	0.0116		0.0572	0.0048	0.0164	0.0448	0.1776	0.0048	2.026	0.0384	0.0012	0.0204	0.02	0.0096	0.0264	0.0004	0.0144			0.0184	0.032	0.0092	0.0152	0.0516	0.0076	0.0248	0.012
0.1204	0.0492	0.0008	0.0144	0.0336	0.1348			0.014	0.0008	0.4156	0.0068	0.0084	0.01	0.1736	0.0136	0.0392	0.0128	0.01	0.0704	0.034	0.0064		0.008	0.026	0.002	0.7244	0.2576	0.0266	0.4332	0.0112	0.4372	0.018	0.0096	0.0192	0.008	0.022	0.0012			0.0672	0.0076	0.0016	0.0252	0.0148	0.0084	0.0616	0.0268
0.0148	0.0016	0.01	0.0268	0.882	0.0144			0.068	0.296	0.0016	0.0048	0.0032	0.018	0.0016	0.0288	0.0236	0.012	0.0012	0.01	0.0188	0.012		0.002	0.1368	0.1924	0.0088	0.0052	0.1368	0.0604	0.028	0.002	0.012	0.0336	0.01	0.0104	0.0112	0.5744			0.0028	0.0004	0.4	0.0568	0.0216	0.0012	0.0116	0.012
0.0012	0.0152	0.0196	0.0144	0.0084	0.0144			0.0136	0.6576	0.1288	0.0308	0.018	0.2108	0.0216	0.0128	0.0164	0.018	0.0004	0.012	0.0116	0.0596		0.0164	0.0024	0.3188	0.026	0.5632	0.0024	0.0052	0.0236	0.002	0.0172	0.0156	0.0204	0.0184	0.0076	0.0492			0.0476	5.2852	0.0324	0.0112	0.0072	0.206	0.0288	0.1168
0.0128	0.0192	0.0468	0.0328	0.0332	0.0256			0.0284	0.0176	0.0572	0.1136	0.0092	0.0476	0.0368	0.0008	0.016	0.192	0.0008	0.0012	0.0388	0.166		0.0168	0.0068	0.0232	0.014	0.0232	0.0068	0.228	0.02	0.282	0.0296	0.0064	0.0244	0.004	0.0024	0.0188			0.014	0.0168	0.4736	0.0644	0.004	0.0108	0.0112	0.0128
0.0072	0.0156	0.0384	0.0084	0.0008	0.1012			0.0692	0.0004	0.2676	5.6752	0.0004	0.0128	0.0136	0.0204	0.0376	0.0104	0.01	0.0184	0.0492	0.096		0.014	0.0032	0.014	0.0016	0.4504	0.008	0.2468	0.002	0.3152	0.0132	0.0016	0.0372	0.0148	0.0484	0.0036			0.2712	0.0108	0.044	0.078	0.0132	0.0552	0.0104	0.0152
0.0492	0.0196	0.0004	0.0208	0.0172	0.0128			0.0272	0.0644	0.1516	0.0344	0.0024	0.0168	0.0188	0.01	0.0184	0.0124	0.0048	0.012	0.0012	0.01		0.0144	0.0116	0.2364	0.0156	0.0392	0.0116	0.0284	0.0192	0.0232	0.0148	0.0084	0.0012	0.0084	0.0136	0.0136			0.0712	0.0052	0.0068	0.0352	0.0128	0.002	0.6636	0.1048
0.008	0.0088	0.02	0.0256	0.0076	0.0348			0.2288	0.0004	0.0172	0.0008	0.01	0.0024	0.0136	0.0044	0.008	0.0144	0.1188	0.0212	0.026	0.0108		0.0156	0.036	0.018	0.0796	0.324	0.0366	0.2776	0.0124	0.046	0.0128	0.0036	0.0116	0.02	0.1172	0.0132			0.0008	0.0036	0.0028	0.0068	0.004	0.0768	0.0232	2.326
0.0004	0.0192	0.0384	0.03	0.0104	0.0768			0.0084	0.0108	0.0204	0.0612	0.7152	0.0384	0.1984	0.0128	0.0128	0.01	0.0456	0.0164	0.0148	0.0232		0.0252	0.0688	0.0468	0.1192	0.7876	0.0688	0.0476	0.0104	0.0156	0.01	0.012	0.0148	0.0116	0.036	0.0108			0.1864	0.0004	0.0832	0.0144	0.02	0.0024	0.0076	0.0016
0.0596	0.0104	0.0172	0.018	0.0316	0.0016			0.0996	0.0112	0.5792	0.006	0.0464	0.0136	0.0856	0.012	0.0544	0.028	0.0116	0.008	0.0368	0.0128		0.0228	0.0276	0.0048	0.0604	0.0288	0.0276	0.0256	0.0008	0.028	0.0132	0.0116	0.0328	0.0064	0.1236	0.0264			0.0136	0.228	0.0004	0.002	0.0096	0.2488	0.0132	0.0276
0.1412	0.0156	0.0256	0.0144	0.0132	0.1212			0.0464	0.0032	0.0004	0.0036	0.0084	0.002	0.0032	0.002	0.0092	0.014	0.0088	0.0104	0.0072	0.0064		0.0816	0.0608	0.0288	0.0532	0.0044	0.0608	0.0044	0.0024	0.0284	0.0156	0.014	0.008	0.014	0.0004	0.0032			0.0028	0.1428	0.3156	0.1752	0.0136	0.014	0.0204	0.0188
0.0212	0.0132	0.254	0.0256	0.012	0.0072			0.0128	0.1496	0.01	0.0408	0.0088	0.0152	0.0056	0.0116	0.0508	0.0128	0.4908	0.0152	0.0328	0.0128		0.0004	1.8076	0.1136	0.7808	0.624	1.8076	0.008	0.016	0.0072	0.0108	0.0264	0.0764	0.0132	0.01	0.0168			0.0088	0.014	0.3596	0.0212	0.012	0.014	0.046	0.0072
0.0112	0.0028	0.0192	0.066	0.014	0.0136			0.1896	0.0472	0.008	0.1148	0.2736	0.0356	0.0328	0.0184	0.0492	0.016	0.008	0.016	0.1364	0.1116		0.036	0.026	0.012	0.0188	0.0584	0.0268	0.0008	0.0236	0.0636	0.01	0.1488	0.018	0.0132	0.014	0.0452			0.072	0.0284	0.0232	0.002	0.3672	0.018	0.01	0.15
0.0004	0.0508	0.0116	0.0168	0.0028	0.0096			0.0136	0.0304	0.002	0.0052	0.0584	0.02	0.0052	0.052	0.0024	0.0548	0.0152	0.0264	0.0336	0.008		0.0172	0.1008	0.0096	0.014	0.018	0.1008	0.5348	0.0036	0.0112	0.016	0.0004	0.0004	0.0136	0.0224	0.0908			0.0168	0.0168	0.1188	0.0152	0.0408	0.0384	1.238	0.0004
0.0004	0.0076	0.01	0.024	0.004	0.1136			0.102	0.0172	0.0152	0.0212	0.1528	0.0388	0.0368	0.0032	0.0212	0.0044	0.01	0.0052	0.0072	0.0024		0.3536	0.098	0.0176	0.0136	0.0044	0.0982	0.0072	0.0084	0.0192	0.0148	0.0208	0.018	0.1692	0.0144	0.0036			0.072	0.07	0.0288	0.0076	0.0144	0.0132	0.016	0.052
0.002	0.0124	0.0084	0.0124	0.0156	0.006			0.0096	0.4204	0.0116	0.5212	0.0016	0.0088	0.0224	0.0124	0.0152	0.0364	0.0164	0.0328	0.0004	0.0112		0.0032	0.0088	0.0552	0.0192	0.0176	0.022	0.0632	0.09	0.0388	0.0292	0.0332	0.0196	0.0096	0.0008	0.0088			0.0092	0.002	0.0124	0.0108	0.0256	0.0136	0.2812	0.0028
0.0224	0.01	0.0032	0.0044	0.0576	0.2096			0.174	0.0276	0.0028	0.0012	0.0016	0.0004	0.0076	0.0336	0.0108	0.0628	0.0112	0.0112	0.0012	0.032		0.0368	0.0348	0.0016	0.0384	0.0304	0.0348	0.3024	0.014	0.006	0.0744	0.06	0.0124	0.0084	0.0132	0.0344			0.01	0.0424	0.0184	0.1992	0.0708	0.0176	0.0168	0.0416
0.0972	0.0168	0.0032	0.0172	0.0028	0.0104			0.0012	0.028	0.2648	0.012	0.0192	0.0204	0.0328	0.0216	0.0052	0.024	0.0192	0.0128	0.0124	0.0116		0.0192	0.016	0.0088	0.1388	0.014	0.016	0.0056	0.0088	0.0048	0.046	0.0028	0.0004	0.0092	0.0076	0.086			0.862	0.0012	0.1716	0.0176	0.0876	0.0048	0.0132	0.0328
0.018	0.0076	0.0096	0.0036	0.0008	0.0236			0.0052	0.002	0.0724	0.2228	0.0176	0.0008	0.0156	0.0456	0.1232	0.0084	0.0152	0.0016	0.0064	0.0096		0.004	0.0104	0.0204	0.0064	0.0008	0.0104	0.0124	0.0004	0.0052	0.0176	0.0152	0.0036	0.0652	0.012	0.024			0.092	0.0304	0.2124	0.044	1.3604	0.014	0.1364	0.0356
0.0008	0.0008	0.1268	0.012	0.2264	0.0252			0.6748	0.0076	0.0676	0.0104	0.0468	0.01	0.0144	0.0808	0.0156	0.022	0.0084	0.0092	0.0096	0.0144		0.05	0.3204	0.0092	0.014	0.0828	0.3204	16.0768	0.0172	0.7172	0.0548	0.0012	0.0032	0.0036	0.2936	0.0036			0.0296	0.008	0.0364	1.026	0.0004	0.686	0.008	0.0028
0.0132	0.0372	0.0116	0.0288	0.018	0.0152			0.1112	0.0008	0.328	0.1092	0.012	0.0192	0.0012	0.0176	0.0164	0.0056	0.0076	0.0156	0.0704	0.0124		0.042	0.0184	0.0796	0.0016	0.0284	0.0184	0.0076	0.004	3.1176	0.0228	0.0196	0.0028	0.0112	0.0124	0.0296			0.0088	0.004	0.0004	0.0208	1.9824	0.0744	0.0012	0.0008
0.0176	0.0012	0.0032	0.0092	0.0008	0.0232			0.3304	2.4372	0.0044	0.0104	0.8004	5.5392	1.1488	0.0232	0.014	0.0496	0.01	0.0116	0.0104	0.0308		0.0096	0.0576	0.0004	0.0008	0.0084	0.0576	0.0044	0.1624	0.0256	0.0516	0.0344	0.018	0.0052	0.0004	0.0108			0.0396	0.01	0.0016	0.3788	0.1032	0.0044	0.4736	0.0628
0.0088	0.0048	0.0096	0.0132	0.01	0.0048			0.0184	3.9488	0.0596	0.3004	0.0036	0.0008	0.094	0.4952	0.008	0.0164	0.004	0.0424	0.0068	0.01		0.0552	0.0364	0.0056	0.0096	0.0224	0.006	0.2984	0.0112	0.0132	0.01	0.3396	0.0216	0.0268	0.0936	0.1184			0.0084	0.0316	0.008	0.0064	0.0364	0.018	0.024	0.0892
0.1708	0.0236	0.0136	0.012	0.0028	0.012			0.014	0.0144	0.0576	0.0212	0.0252	0.0244	0.1104	0.0108	0.0104	0.012	0.0136	0.0096	0.0036	0.0128		0.002	0.0628	0.026	0.0076	0.0192	0.0628	0.0308	0.002	0.0124	0.038	0.0016	0.0004	0.0096	0.0136	0.002			0.086	0.0124	0.0104	0.034	0.0396	0.0016	0.0068	0.012
0.01	0.0992	0.0104	0.0248	0.0032	0.0088			0.0064	0.7204	0.5204	0.88	0.052	0.0144	0.6092	0.01	0.0004	0.01	0.022	0.0124	0.0144	0.026		0.1124	0.0496	0.0076	0.0164	0.0112	0.0496	0.0016	0.0528	0.0272	0.0124	0.0044	0.1036	0.0212	0.0348	0.0224			0.1068	0.0208	3.0668	0.1212	0.1524	0.0164	0.0052	0.0224
0.0608	0.0172	0.0312	0.01	0.0084	0.0308			0.0096	0.0492	0.0056	0.0072	0.002	0.27	0.074	0.1352	0.002	0.0108	0.0044	0.0104	0.0088	0.1748		0.0028	0.0192	0.044	0.0028	0.0008	0.0192	0.6416	0.0144	0.218	0.0128	0.012	0.0004	0.01	0.1544	0.0004			0.0288	0.1816	0.2228	0.0136	0.0008	0.0016	0.0124	0.3076
0.0184	0.0512	0.1644	0.01	0.0028	0.1124			0.0076	0.0456	0.0004	0.0192	0.416	0.0092	0.01	0.026	0.0112	0.0212	0.002	0.0092	0.0228	0.0092		0.0016	0.138	0.0252	0.0128	0.0068	0.1386	0.0124	0.0352	0.0332	0.0116	0.0112	0.0064	0.0188	0.0136	0.008			0.0296	0.0116	0.0072	0.0424	0.0832	0.012	0.1424	0.022
0.0088	0.004	0.0124	0.01	0.0084	0.014			0.2444	0.0072	0.3212	0.0988	0.0036	0.0068	0.0524	0.0104	0.0076	0.0192	0.0128	0.0152	0.068	0.002		0.016	1.3772	0.0108	0.0088	0.302	1.3772	0.4116	0.0264	0.242	0.0112	0.0116	0.0248	0.0724	0.0284	0.0156			0.0668	0.0388	0.1016	0.0176	0.0024	0.0048	0.0128	0.0192
0.0216	0.0188	0.0092	0.0072	0.0088	0.0368			0.336	0.0072	0.0136	2.3996	0.0488	0.1524	0.006	0.1208	0.024	0.0108	0.004	0.0084	0.0144	0.0076		0.0304	0.2	0.0176	0.1928	0.0176	0.2452	0.0164	0.0064	0.0008	0.0128	0.01	0.0072	0.0344	0.0128	0.0124			0.0004	0.0964	0.03	0.4536	0.0236	0.0288	0.0136	0.0024
0.0072	0.0016	0.0008	0.0424	0.0308	0.0404			0.0764	0.0244	0.0144	0.0132	0.0072	0.0072	0.0552	0.1008	0.0004	0.014	0.0432	0.0144	0.0168	0.0196		0.0136	0.02	0.5548	0.0076	0.0036	0.024	0.002	0.16	0.0044	0.0132	0.0076	0.014	0.002	0.0064	0.0128			0.0052	0.0076	0.0044	0.0004	0.0012	0.0388	0.9788	0.0208
0.0168	0.02	0.0316	0.0112	0.1216	0.0232			0.5548	0.04	0.0016	0.004	0.0404	0.0464	0.0096	0.0008	0.1112	0.0148	0.0252	0.0112	0.0252	0.0296		0.006	0.0112	0.0188	0.0036	0.0028	0.0112	0.0156	0.0188	0.0116	0.2072	0.1228	0.0156	0.0252	0.0512	0.1452			0.1392	0.058	0.2004	0.1668	0.0048	26.5596	0.0152	0.0004
0.0164	0.0288	0.0824	0.01	0.0148	0.0116			0.0144	1.2052	0.0172	0.0064	0.0032	0.132	0.126	0.0296	0.0092	0.0096	0.0208	0.012	0.0404	0.01		0.054	0.1876	0.0032	0.0032	0.12	0.1876	0.2028	0.3992	0.0836	0.0148	0.0584	0.004	0.014	0.004	0.0288			0.0004	0.002	0.0636	0.0196	0.0056	0.0056	0.0652	0.2024
0.2436	0.0216	0.0468	0.026	0.0716	0.0336			0.082	0.0024	0.0716	0.0392	0.088	0.0032	0.1872	0.0196	0.0112	0.0052	0.0064	0.0124	0.022	0.0096		0.0492	0.0032	0.0172	0.1416	0.048	1.886	0.0056	0.1888	0.0172	0.0104	0.0116	0.0128	0.0316	0.0068	0.0032			0.22	0.0092	0.002	0.0064	0.0168	0.0124	0.0004	0.0128
0.0088	0.0176	0.0292	0.0096	0.0276	0.014			0.2616	0.1672	0.124	0.0452	0.052	0.0324	0.0088	0.0184	0.0216	0.0128	0.0088	0.0208	0.0128	0.0728		0.0008	0.0488	0.1444	0.0228	0.0096	0.0488	0.0076	0.084	0.0128	0.0044	0.0712	0.04	0.0056	0.0144	0.0028			0.0636	0.0084	0.0232	0.0004	0.0088	0.0136	0.0016	0.016
0.004	0.0244	0.0312	0.1288	0.0472	0.0172			1.4428	0.0772	0.01	0.0036	0.0052	0.08	0.0152	0.0524	0.0072	0.0188	0.0064	0.0412	0.0808	0.0112		0.0008	0.0592	0.0128	0.0096	0.0076	0.0592	0.0024	0.01	0.02	0.0332	0.0088	0.0156	0.0124	0.0232	0.0192			0.1804	0.0312	0.0084	0.0092	0.0068	0.0116	0.0232	0.0836
0.0196	0.0156	0.0008	0.0004	0.0116	0.0496			0.0644	0.036	0.1984	0.0056	0.0048	0.0228	0.144	0.0208	0.0124	0.006	0.0108	0.0132	0.0732	0.0172		0.0176	0.0996	0.0032	0.0472	0.006	0.012	0.0508	0.0072	0.0092	0.0132	0.0064	0.0168	0.0024	0.0332	0.0016			0.016	0.0228	1.3368	0.0104	0.0328	0.0128	0.0216	0.0284
0.0176	0.0092	0.0168	0.0308	0.0224	0.1124			0.0196	0.0284	0.03	0.0076	0.0356	0.036	0.5428	0.1344	0.0092	0.0204	0.0004	0.072	0.0072	0.0144		0.1604	0.0504	0.0524	0.0048	0.0084	0.0504	0.016	0.0024	0.0056	0.024	0.014	0.0076	0.002	0.0008	0.0112			0.5908	0.0128	0.0276	0.028	0.0004	0.0016	0.0136	0.0468
0.0172	0.0584	0.7392	0.0156	0.0584	0.0084			0.0948	0.0012	0.1196	0.0044	0.2376	0.1892	0.018	0.1228	0.0112	0.0408	0.0128	0.0112	0.2656	0.0052		0.01	0.0016	0.0068	0.0148	0.0692	0.01	0.0168	0.0008	0.0192	0.0372	0.0856	0.012	0.0164	0.0088	0.2088			0.0772	0.0012	0.1456	0.022	0.004	1.4696	0.0152	0.054
0.008	0.006	0.1272	0.0124	0.0284	0.0096			0.0016	0.5076	0.0112	0.0356	0.0584	0.0068	0.0016	0.0156	0.1856	0.0132	0.018	0.0284	0.0108	0.0196		0.012	0.0044	0.022	0.0004	0.0056	0.0044	0.0048	0.1128	0.0044	0.03	0.0088	0.0644	0.0024	0.116	0.0108			0.01	0.2796	0.8276	0.0032	0.1532	0.0004	0.034	0.028
0.0116	0.0124	0.02	0.01	0.0144	0.006			0.026	0.3136	0.0076	0.0516	0.3004	0.3632	0.0592	0.0072	0.0412	0.0144	0.0052	0.004	0.0428	0.014		0.0384	0.0004	0.0468	0.082	3.964	0.0004	0.014	0.388	2.4192	0.0248	0.0232	0.0288	0.0588	0.0272	0.0116			1.5336	0.0728	0.0028	0.0072	0.2048	0.0056	0.0152	0.118
0.0032	0.0128	0.0224	0.0124	0.0552	0.0168			0.0268	0.0068	0.042	0.0488	0.0168	0.0036	0.0132	0.086	0.026	0.0144	0.0344	0.0748	0.0308	0.008		0.0392	0.6404	0.1332	0.0628	0.0468	0.6404	0.054	0.01	0.0452	0.0092	0.01	0.012	0.0268	0.0208	0.012			0.0348	0.0028	0.0248	0.0196	0.0044	0.014	0.0088	0.0084
0.0148	0.0044	0.0516	0.0248	0.1352	0.102			0.0004	0.0088	0.1328	0.012	0.0124	0.0376	0.0032	0.0604	0.0496	0.0148	0.0028	0.0092	0.0024	0.0104		0.004	0.0492	0.0804	0.0008	0.0524	0.0492	0.0152	0.0164	0.0416	0.0088	0.1212	0.0104	0.016	0.0028	0.0904			0.0104	0.024	0.1608	0.0128	0.0104	0.0208	0.1068	0.0428
0.004	0.0128	0.008	0.0128	0.012	0.0156			0.0104	0.2136	0.0128	0.1668	0.1344	0.0092	0.016	0.0104	0.0696	0.0088	0.0228	0.0068	0.0096	0.0108		0.012	0.03	0.0004	0.586	0.0036	0.0344	0.0404	0.058	0.0156	0.004	0.0004	0.0072	0.0212	0.0168	0.004			0.02	0.0912	0.0332	0.0536	0.1548	0.0016	0.0128	0.0024
0.028	0.0128	0.0108	0.072	0.0128	0.012			0.002	0.0004	0.0028	0.0076	0.0264	0.0112	0.0096	0.0148	0.0928	0.0188	0.0196	0.0516	0.006	0.0004		0.1792	0.0128	0.0088	0.002	0.1232	0.0128	0.0128	0.0176	0.044	0.024	0.106	0.0124	0.024	0.0136	0.0228			0.0084	0.05	0.0072	0.0276	0.2096	0.022	0.0016	0.032
0.0456	0.0184	0.0096	0.022	0.0384	0.0124			0.2236	0.1744	0.038	2.7428	0.0096	0.0448	0.0108	0.0124	0.024	0.0104	0.0212	0.0172	0.0644	0.0152		0.08	0.1316	0.0984	0.0216	0.0164	0.012	0.0016	0.0004	0.3376	0.0072	0.0864	0.0148	0.0076	0.0416	0.0692			0.004	0.0028	0.014	0.0004	0.0288	0.0236	0.0124	0.006
0.0112	0.0152	0.0004	0.016	0.0336	0.0136			0.0764	0.0012	0.0796	0.224	0.002	0.0216	0.0296	0.0376	0.0152	0.014	0.0832	0.0396	0.0068	0.0212		0.0068	0.0704	0.0064	0.016	0.0032	0.026	0.0876	0.0068	0.0268	0.0088	0.0044	0.0108	0.0004	0.0024	0.0096			0.008	0.0128	0.0524	0.3168	0.0004	0.0248	0.5456	0.1136
0.0088	0.048	0.078	0.0168	0.16	0.008			0.0132	0.1196	0.0068	0.3712	0.0144	0.0992	0.0132	0.0216	0.0036	0.0076	0.0288	0.0032	0.0468	0.01		0.01	0.0072	0.1072	0.012	0.0204	0.0072	0.156	0.0004	0.0104	0.1584	0.1824	0.0036	0.0132	0.012	0.0512			0.004	0.038	0.0348	0.0128	0.0008	2.3032	0.0116	0.096
0.028	0.0256	0.0576	0.0336	0.0044	0.01			0.1504	0.022	0.12	0.0672	0.0592	0.0004	0.1744	0.0312	0.2828	0.006	0.0016	0.0116	0.0124	0.0084		0.0208	0.3064	0.006	0.0768	0.1064	0.3064	0.0188	0.0032	0.01	0.0408	0.0208	0.0128	0.012	0.0544	0.0064			0.14	0.0076	0.03	0.0164	0.0108	0.0124	0.002	0.01
0.0188	0.028	0.004	0.0128	0.0096	0.0156			0.0004	0.0392	0.0032	0.0028	0.0364	0.0004	0.5192	0.0152	0.0184	0.0092	0.01	0.0788	0.0388	0.0148		0.0256	0.3496	0.004	0.0092	0.0176	0.3496	0.0076	0.1132	0.0152	0.014	0.0312	0.0144	0.0132	0.1304	0.0072			0.0304	0.0032	0.0224	0.0052	6.626	0.0388	0.03	0.0256
0.0116	0.002	0.2404	0.026	0.0396	0.0136			0.002	0.0004	0.1148	0.1268	0.0324	0.048	0.0128	0.0208	0.0028	0.0156	0.0168	0.07	0.0052	0.692		0.0148	0.0208	0.1052	0.0632	2.0836	0.0208	0.0056	0.0296	0.0076	0.01	0.018	0.014	0.0156	0.0052	0.0376			0.002	0.0212	0.0328	0.0004	0.0128	0.2228	0.0112	0.0616
0.0084	0.0036	0.0936	0.01	0.0224	0.0328			0.0424	0.0032	0.1464	0.012	0.0468	0.0936	0.016	0.1092	0.0116	0.0124	0.0284	0.0152	0.0284	0.012		0.0216	0.0032	0.8948	0.0256	0.0716	0.196	0.0008	0.038	0.0096	0.0036	0.0056	0.018	0.0112	0.0276	0.0188			0.0012	0.0052	0.0216	0.0976	3.4652	0.026	0.0116	0.018
0.0184	0.0236	0.0004	0.0212	0.324	0.0104			0.0004	0.0128	0.5528	0.0104	0.0164	0.0084	0.0128	0.0392	0.0128	0.016	0.0208	0.1912	0.0528	0.0028		0.0116	1.4256	0.6576	0.03	0.0252	1.4256	0.0012	0.0332	0.0068	0.0096	0.0112	0.0112	0.0224	0.0148	0.0056			0.0604	0.0028	0.0172	0.0148	0.0032	0.004	0.0028	0.0148
0.0032	0.0152	0.0112	0.034	0.0072	0.01			0.016	0.1296	0.0076	0.0368	0.0084	0.306	0.0128	0.008	0.0004	0.01	0.0104	0.0272	0.0024	0.0156		0.0496	0.0096	0.2256	0.1544	0.0076	0.0096	0.0064	0.0064	0.0028	0.0128	0.0424	0.0024	0.0168	0.0012	0.0148			0.0112	0.038	0.008	0.9604	0.0024	0.0024	0.0004	0.0084
0.0028	0.0012	0.0156	0.0228	0.0064	0.004			0.0024	0.0396	0.0404	0.4836	0.01	0.0536	0.014	0.0008	0.1072	0.0112	0.0096	0.002	0.1124	0.0016		0.0108	0.0644	0.002	0.0664	0.0788	0.0644	0.0144	0.0168	0.0312	0.01	0.0128	0.0084	0.0084	0.0284	0.0792			0.06	0.0316	0.19	0.3	0.2744	0.0004	0.0392	0.0024
0.0016	0.0092	0.0084	0.0088	0.0008	0.0044			0.0604	0.0132	0.258	0.1404	0.0224	0.0484	0.0316	0.0116	0.0004	0.01	0.006	0.0076	0.0256	0.0072		0.0236	0.0076	0.0032	0.0004	0.0048	0.0076	1.166	0.0024	0.3864	0.0588	0.018	1.2752	0.016	0.0056	0.0064			0.012	0.03	0.632	0.0004	2.9672	0.0344	0.0112	0.0916
0.016	0.0036	0.0028	0.102	0.0072	0.0124			1.1788	0.1588	0.0048	0.0692	0.0048	0.012	0.0208	0.0068	0.0192	0.032	0.0212	0.0368	0.0292	0.0128		0.0144	0.0004	0.1392	0.0244	0.0008	0.058	0.1152	0.0292	0.0056	0.0024	0.0112	0.008	0.014	0.01	0.0124			0.2788	0.0164	0.1032	0.034	0.1528	0.0788	0.0136	0.0656
0.0016	0.0668	0.0104	0.0168	0.01	0.036			0.0372	0.0028	0.0084	0.0428	0.0092	0.0872	0.0236	0.0028	0.0204	0.0088	0.01	0.0476	0.1172	0.082		0.0052	0.0204	0.024	1.4644	0.02	0.0204	0.0248	0.0276	0.0176	0.0088	0.0232	0.0032	0.0056	0.014	0.0004			0.012	0.024	0.0268	0.0876	0.0016	0.242	0.0124	0.0388
0.0188	0.0072	0.036	0.01	0.0128	0.0256			0.0732	0.0052	0.006	0.0184	0.0068	0.0436	0.0104	0.0168	0.072	0.0132	0.0348	0.0224	0.0232	0.0388		0.0348	0.014	0.0388	0.3856	0.0212	0.0142	0.0312	0.0568	0.01	0.0192	0.0492	0.01	0.0156	0.0112	0.1412			0.0052	0.0048	0.0012	0.0016	0.0792	0.0012	0.0136	0.014
0.3352	0.014	0.0428	0.0324	0.0052	0.0264			0.0008	0.0004	0.0136	1.0944	0.0312	0.1652	0.0284	0.0112	0.0192	0.0068	0.0416	0.0288	0.0236	0.012		0.0112	0.03	0.0372	0.0104	0.014	0.0372	0.0016	0.01	0.014	0.044	0.0116	0.0116	0.0224	0.0132	0.214			0.0588	0.0052	0.292	3.3296	0.0044	0.0156	0.0316	0.0364
0.0472	0.0344	0.002	0.0112	0.0292	0.0012			0.0932	0.0468	0.2256	0.014	0.0044	0.0056	0.0384	0.0024	0.0116	0.0092	0.0116	0.0928	0.0044	0.0152		0.0356	0.076	0.0412	0.0248	0.0288	0.0764	0.0108	0.016	0.0936	0.01	0.0144	0.0088	0.536	0.01	0.014			0.0272	0.0132	0.0496	0.0184	0.0312	0.0308	0.0132	0.0144
0.0144	0.0116	0.0236	0.0188	0.016	0.0176			0.022	0.0024	0.002	0.5692	0.0356	0.2644	0.01	0.0252	0.0092	0.002	0.004	0.0124	0.0056	0.0104		0.0032	0.0108	0.1128	0.0056	0.0228	0.036	0.0016	0.0072	0.0104	0.0016	0.0236	0.0196	0.0412	0.01	0.4424			0.0112	0.0116	0.1652	0.0188	0.8168	0.006	0.0236	0.032
0.014	0.0208	0.0172	0.0084	0.0016	0.0052			0.8156	0.2324	0.56	0.0268	0.0044	0.0128	0.0388	0.0128	0.0312	0.018	0.0108	0.0024	0.0128	0.0424		0.0128	0.0252	0.0464	0.0116	0.0092	0.012	0.0048	0.0132	0.0804	0.0204	0.0188	0.0152	0.0068	0.0052	0.0092			0.0332	0.0144	0.0072	0.0004	0.0224	0.0324	0.022	0.0124
0.028	0.01	0.012	0.0132	0.0108	0.0452			0.0416	6.548	0.102	0.046	0.0992	0.0248	0.0312	0.0236	0.0016	0.016	0.0216	0.0116	0.0112	0.016		0.0412	0.0076	0.0932	0.0328	0.0316	0.018	0.1312	0.0036	0.0124	0.0088	0.0092	0.0156	0.0084	0.0444	0.0124			0.0952	0.0248	0.014	0.0008	0.0124	0.034	0.0016	0.0104
0.0084	0.0328	0.0156	0.0224	0.0168	0.0576			1.092	0.0328	0.0204	0.554	0.0412	0.0052	0.0356	0.0116	0.0512	0.0164	0.0104	0.0088	0.022	0.0376		0.0156	3.7428	0.0284	0.0228	0.2392	3.7428	0.0036	0.0036	0.0096	0.0272	0.1244	0.0204	0.0136	0.0128	0.0004			0.0176	0.0748	0.0004	0.024	0.0536	0.0376	0.0256	0.004
0.0024	0.0264	0.0124	0.0104	0.03	0.2588			0.2068	0.0124	0.0144	0.2476	0.016	0.0292	0.0136	0.0132	0.01	0.0116	0.0192	0.0228	0.0256	0.0132		0.6536	0.0056	0.1144	0.0112	0.1416	0.0056	0.2216	0.0636	0.0072	0.01	0.0024	0.002	0.014	0.0088	0.0992			0.0688	0.0016	0.0004	0.1576	0.0232	0.0724	0.0148	0.0128
0.0536	0.0556	0.0096	0.0112	0.0952	0.2596			0.4352	0.02	0.4236	0.004	0.0312	0.0216	0.0424	0.1004	0.0244	0.0068	0.0096	0.0676	0.0436	0.002		0.0788	0.0088	0.0116	0.0084	0.0332	0.0088	0.0048	0.2556	0.0024	0.0532	0.0288	0.0932	0.0132	0.0044	0.0004			0.1192	0.0096	0.0416	0.3824	0.0232	0.1056	0.01	0.0104
0.018	0.008	0.0376	0.0184	0.0248	0.0208			0.0316	0.0184	0.0148	1.0228	0.0132	0.3588	0.0068	0.0128	0.0532	0.0256	0.0248	0.0192	0.0156	0.0216		0.0764	0.012	0.0068	0.0228	0.0204	0.0124	0.0156	3.8308	0.0112	0.012	0.0536	0.0128	0.144	0.0648	0.1004			0.0088	0.0104	0.0144	0.072	0.0036	0.0212	0.0096	0.0104
0.3332	0.0128	0.0364	0.0188	0.0188	0.0104			0.0028	0.0124	0.058	0.0048	0.0936	0.04	0.008	0.0036	0.0092	0.0156	0.0032	0.0116	0.0088	0.0128		0.012	0.3464	0.4792	0.0576	0.0132	0.3464	0.108	0.0332	0.268	0.0068	0.0052	0.1856	0.0216	0.0044	0.0396			0.0088	0.0976	0.5532	0.0072	0.0016	0.0064	0.0112	0.0028
0.0116	0.0544	0.02	0.0404	0.012	0.0124			0.014	0.2124	0.0052	0.122	0.0096	0.0172	0.0136	0.1608	0.0112	0.0112	0.0156	0.0272	0.0168	0.0024		0.0596	0.0168	0.0876	0.0056	0.0608	0.0168	0.0056	0.2804	1.5044	0.0204	0.0052	0.0076	0.002	0.0136	0.078			0.036	0.0104	0.0376	0.0416	0.0284	0.7292	0.0356	0.086
0.0144	0.0012	0.0076	0.0116	0.004	0.0072			0.022	0.4696	0.0344	0.2428	0.02	0.198	0.0128	0.0128	0.01	0.0132	0.0008	0.0248	0.1352	0.0128		0.0052	0.3428	0.356	0.0052	0.1656	0.3428	0.0352	0.01	1.7592	0.0752	0.0264	0.0124	0.012	0.0176	0.0036			0.0224	0.0064	0.0324	0.0388	0.0964	0.4284	0.0376	0.0136
0.0156	0.0552	0.0072	0.0028	0.0024	0.0136			0.0008	0.116	0.0304	0.0116	0.1052	0.0044	0.002	0.004	0.018	0.0112	0.0176	0.1136	0.018	0.0168		0.038	0.2952	0.0316	0.096	0.2256	0.2952	0.0724	0.0092	0.0588	0.0116	0.0136	0.0416	0.0372	0.0068	0.0224			0.0424	0.286	0.0084	0.002	0.0592	0.0016	0.0732	0.1812
0.0096	0.012	0.014	0.0096	0.0152	0.0168			0.0324	0.004	0.0864	0.0128	0.252	0.3008	0.6752	0.012	0.002	0.0108	0.0096	0.0268	0.0076	0.0252		0.0016	0.0412	0.0664	0.0116	0.002	0.0412	0.0476	0.0116	0.0156	0.012	0.012	0.0104	0.036	0.0064	0.004			0.0148	0.0028	0.0168	0.0008	0.0104	0.0184	0.012	0.0252
0.0284	0.0112	0.0532	0.002	0.0096	0.0024			0.0112	0.0924	0.0004	0.6852	0.0028	0.0004	0.8296	0.0264	0.022	0.0036	0.0352	0.0164	0.0764	0.0084		0.0532	0.048	0.0476	0.056	0.1448	0.048	0.0016	0.0072	0.04	0.0088	0.0108	0.0056	0.01	0.0012	0.004			0.0216	0.0088	0.0064	0.0276	0.038	0.0696	0.0216	0.012
0.0124	0.0072	0.0396	0.0092	0.0228	0.0148			0.0012	0.0252	0.004	0.0328	0.0012	0.0256	0.0112	0.026	0.0084	0.0088	0.014	0.0016	0.0156	0.0068		0.0072	0.002	0.0752	0.0096	0.0016	0.0024	0.0024	0.0116	0.01	0.0556	0.0136	0.0276	0.0092	0.0392	0.1476			0.2624	0.0216	0.0716	0.0116	0.0116	0.014	0.0068	0.0256
0.0064	0.016	0.0084	0.0096	0.0196	0.0108			0.01	0.0052	0.0208	0.0044	0.1148	0.1468	0.0292	0.0228	0.0128	0.042	0.0208	0.0184	0.0004	0.0064		0.0136	0.0012	0.0016	0.0084	0.0192	0.0012	0.0004	0.0044	0.008	0.0132	0.0084	0.0128	0.0068	0.0268	0.0096			0.0864	0.0008	0.1672	0.2904	0.09	0.0116	0.064	0.1544
0.0772	0.0132	0.0116	0.0172	0.0148	0.0272			0.0416	0.0272	0.3644	0.0636	0.012	0.3064	0.0144	0.076	0.0676	0.0144	0.0116	0.0432	0.0124	0.0092		0.0464	0.1252	0.12	0.018	0.0488	0.01	0.268	0.0512	0.0204	0.0004	0.0156	0.0072	0.0112	0.018	0.0212			0.1116	0.022	0.0096	0.0076	0.0156	0.106	0.7164	0.0208
0.0312	0.01	0.0008	0.0184	0.014	0.008			0.0772	0.0096	0.3092	0.012	0.0004	0.0108	0.0496	0.018	0.014	0.014	0.0104	0.16	0.0112	0.01		0.0468	1.6336	0.7384	0.0124	0.0476	1.6336	0.0608	0.0048	0.0028	0.0104	0.0316	0.0168	0.0096	0.0064	0.0088			0.0052	0.0028	1.348	0.0536	0.0228	0.008	0.0092	0.0196
0.006	0.0244	0.0564	0.0152	0.0164	0.1304			0.008	0.0456	0.0036	0.014	0.002	0.0792	0.0124	0.0528	0.0604	0.0188	0.012	0.0112	0.0064	0.0152		0.0092	0.0052	0.0024	0.032	0.0096	0.0052	0.1524	0.4712	0.0144	0.0128	0.002	0.036	0.01	0.002	0.02			0.0008	0.0744	0.002	0.014	0.0184	0.39	0.1648	0.004
0.0216	0.0144	0.0044	0.0096	0.0004	0.1592			0.0932	0.0008	0.0012	0.0004	0.0028	0.0104	0.0232	0.0044	0.01	0.01	0.01	0.0164	0.006	0.0096		0.0024	0.0272	0.0544	0.0072	0.0004	0.0272	0.1352	0.0276	0.0132	0.0268	0.0732	0.0376	0.0124	0.0136	0.0232			0.7392	0.0004	0.03	0.2604	0.0376	0.0016	0.006	0.0792
0.0164	0.0104	0.0172	0.006	0.042	0.0136			0.0228	0.902	0.0104	0.1128	0.0132	0.0064	0.0536	0.1652	0.0188	0.01	0.1692	0.0096	0.0336	0.0156		0.0152	0.0216	0.0384	0.0144	0.0004	0.0216	0.154	0.0024	0.0136	0.01	0.0396	0.0144	0.0316	0.01	0.458			0.0084	0.0664	0.0012	0.0352	0.0052	0.0016	0.012	0.018
0.002	0.0192	0.1332	0.0148	0.0024	0.0016			0.8032	0.078	0.0148	0.002	0.0388	0.2824	0.0016	0.1428	0.0336	0.0224	0.1048	0.0068	0.0028	0.0484		0.0084	0.2	0.0684	0.004	0.0128	0.2112	0.012	0.1364	0.0112	0.0352	0.0116	0.0408	0.0108	0.016	0.008			0.7444	0.0216	0.1024	0.0044	0.0192	0.014	0.0248	0.0784
0.0284	0.0136	0.0064	0.0136	0.0116	0.0544			2.0832	0.0048	0.0576	0.0088	0.0104	0.0008	0.0316	0.0472	0.0104	0.0136	0.0012	0.0216	0.0104	0.0496		0.0052	0.0048	0.0008	0.066	0.02	0.0048	0.4124	0.094	0.3188	0.028	0.01	0.006	0.11	0.0132	0.0124			0.0012	0.0012	0.3928	0.0556	0.0036	0.0452	0.0116	0.0176
0.0292	0.0864	0.0104	0.0128	0.014	0.014			0.3168	0.1644	0.008	26.8732	0.0276	0.0252	0.024	0.1368	0.2584	0.0132	0.0092	0.0152	0.0052	0.0852		0.0264	0.1188	0.0472	0.024	0.2208	0.1188	0.1992	0.0188	0.034	0.01	0.0004	0.0152	0.2712	0.01	0.0208			0.02	0.0132	0.276	0.0168	0.0124	0.0008	0.012	0.1616
0.0488	0.0192	0.0136	0.0128	0.004	0.0164			0.0296	0.0036	0.0024	0.0704	0.016	0.0692	0.0344	0.042	0.0056	0.0104	0.0288	0.0104	0.0384	0.008		0.376	0.0444	0.17	0.0092	0.0004	0.0444	0.0188	0.0016	0.2196	0.018	0.0024	0.0248	0.0332	0.056	0.01			0.0064	0.028	0.0256	0.0512	0.0024	0.0148	0.0124	0.0144
0.0148	0.0668	0.0204	0.0188	0.0028	0.014			0.0124	0.0004	0.0008	0.0028	0.3112	0.0228	0.0016	0.0164	0.0144	0.0104	0.024	0.052	0.0224	0.104		0.016	0.002	0.0148	0.0064	0.006	0.0026	0.0304	0.1264	0.4628	0.018	0.0364	0.0244	0.0136	0.0104	0.074			0.0732	0.0012	0.0444	0.3488	0.0668	0.006	0.0132	0.0024
0.1084	0.0236	0.0004	0.0124	0.1656	0.012			0.1008	0.0136	0.0272	0.1856	0.1372	0.0516	0.6304	0.0372	0.0208	0.0024	0.02	0.0212	0.0228	0.0136		0.004	7.8512	0.0972	0.012	0.0004	7.8512	0.0136	0.004	0.0184	0.0032	0.01	0.0264	0.0192	0.0136	0.0152			0.114	0.0612	0.0828	0.012	4.152	0.0268	0.0076	0.0548
0.0652	0.002	0.1516	0.0128	0.0052	0.01			1.7188	0.0328	0.0004	0.0084	0.174	0.1352	0.018	0.2384	0.012	0.0128	0.014	0.0216	0.0108	0.0188		0.0132	0.062	0.0768	0.0812	0.0232	0.0622	0.0748	0.0256	0.0308	0.01	0.0852	0.0388	0.0436	0.0108	0.028			0.6432	0.0212	0.0572	0.016	0.0588	1.0364	0.0012	0.016
0.02	0.0072	0.016	0.044	0.0184	0.0052			0.0644	0.02	0.008	0.0608	0.0308	0.038	0.028	0.0164	0.0048	0.0128	0.0108	0.0128	0.0092	0.1148		0.0064	0.1216	0.0004	0.0512	0.0272	0.1216	0.4356	0.058	0.1108	0.0244	0.0168	0.0312	0.0076	0.006	0.046			0.0196	0.0128	0.0084	0.0108	0.0076	0.008	0.0124	0.0152
0.0244	0.0044	0.0288	0.0128	0.2268	0.0252			0.2492	0.0016	0.0248	0.0068	0.0216	0.0436	0.0032	0.1372	0.01	0.0268	0.0136	0.0424	0.002	0.0188		0.0096	0.0232	0.0096	0.0104	0.252	0.0232	0.002	0.0356	0.1408	0.0064	0.0004	0.0248	0.01	0.002	0.044			0.0152	0.0776	0.0004	0.004	0.0016	0.1436	0.034	0.0148
0.0048	0.008	0.016	0.052	0.0132	0.0112			0.1616	0.0132	0.2652	0.0268	0.3392	0.0188	0.2852	0.012	0.3	0.0104	0.026	0.0404	0.0244	0.0244		0.024	0.2248	0.0064	0.0008	0.0056	0.2248	0.0012	0.0828	2.7372	0.0104	0.0088	0.0024	0.0172	0.0208	0.0008			0.002	0.0096	0.1668	0.0176	0.0136	0.0068	0.108	0.0164
0.006	0.0088	0.0308	0.01	0.0072	0.0248			0.1032	0.0184	0.308	0.6292	0.0048	0.2212	0.2112	0.0184	0.0072	0.0032	0.0052	0.0628	0.7012	0.02		0.04	0.0028	0.0516	0.0348	0.4216	0.272	0.0252	0.0856	0.014	0.0124	0.0048	0.0056	0.018	0.0008	0.0156			0.008	0.0076	0.2244	0.0072	0.8452	0.034	0.1296	0.0116
0.0156	0.0144	0.0144	0.0216	0.0076	0.2436			0.1852	0.2352	0.0196	0.1396	0.018	0.0272	0.3288	0.0064	0.026	0.0132	0.006	0.012	0.0136	0.0184		0.0044	0.0004	0.0068	0.072	0.0216	0.0004	0.0024	0.036	0.046	0.008	0.0684	0.0108	0.0136	0.0132	0.1232			0.4912	0.0132	0.0156	0.004	0.0232	0.0028	0.1404	0.04
0.0424	0.0344	0.0268	0.002	0.0116	0.1656			0.004	0.2712	0.0064	0.764	0.0064	0.0152	0.0132	0.0132	0.0336	0.0064	0.1208	0.0612	0.0268	0.0336		0.0104	0.0112	0.2748	0.0152	0.0692	0.0112	0.0016	0.1284	0.0172	0.008	0.0268	0.0024	0.0096	0.0004	0.012			0.002	0.002	1.2664	0.01	0.0152	0.0004	0.0164	0.0344
0.0552	0.0124	0.0612	0.0092	0.0048	0.0144			0.0032	0.4044	0.0056	0.0256	0.0064	3.0012	0.0128	0.012	0.0356	0.0056	0.0216	0.0104	0.0172	0.0004		0.0176	0.0464	0.6	1.284	0.0636	0.0464	0.0004	0.0116	0.002	0.0184	0.0176	0.02	0.0144	0.0152	0.044			0.0088	0.068	0.0012	0.1868	0.0044	0.0008	0.0136	0.07
0.0184	0.01	0.0292	0.0128	0.1272	0.0332			0.0032	0.0152	0.0048	0.0136	0.0208	0.0512	0.01	0.0636	0.0552	0.0096	0.0324	0.0128	0.03	0.0212		0.0272	0.0232	0.0444	0.0124	0.0184	0.0232	0.0008	0.0196	0.0096	0.0108	0.5196	0.0004	0.0164	0.0092	0.0044			0.0388	0.0012	0.0968	0.09	0.0036	0.0164	0.006	0.0148
0.0156	0.0116	0.012	0.0112	0.0452	0.046			2.0768	0.0008	0.0116	0.0856	0.016	0.1772	0.098	0.836	0.1044	0.0352	0.01	0.0092	0.004	0.0096		0.0116	0.0224	2.8016	0.0108	0.0368	0.008	0.192	0.162	0.0036	0.0092	0.0052	0.0116	0.0092	0.0012	0.1204			0.0012	0.1668	1.7452	0.0112	0.0044	0.0176	0.0512	0.0008
0.0192	0.0072	0.008	0.0964	0.0028	0.3572			0.0304	0.0116	0.1212	0.016	0.1408	0.0012	0.0288	0.0176	0.0648	0.0112	0.0044	0.0756	0.0228	0.0044		0.0016	0.276	0.32	0.0012	0.0124	0.2768	0.0008	0.0612	0.0036	0.0144	0.0036	0.0004	0.016	0.0296	0.0076			0.0688	0.0656	0.0568	0.0928	0.0236	0.0224	0.326	0.0124
0.0024	0.0068	0.0156	0.0064	0.024	0.0164			0.0036	0.03	0.016	0.0036	0.0156	0.8444	0.4584	0.0656	0.1012	0.0124	0.0036	0.0636	0.014	0.0004		0.0104	0.556	0.2696	0.048	0.0168	0.5564	0.1012	1.3296	0.0164	0.006	0.0008	0.0192	0.0124	0.0112	0.008			0.0148	0.0024	0.0068	0.0108	0.0468	0.0016	0.024	0.0112
0.0092	0.0016	0.0292	0.0268	0.0656	0.014			0.1472	0.0172	0.04	0.1156	0.0112	0.0972	0.012	0.0188	0.0192	0.01	0.0044	0.0004	0.0148	0.01		0.1796	0.0248	0.1564	0.0104	0.0008	0.0248	0.0336	0.008	0.01	0.0556	0.0012	0.0448	0.0044	0.036	0.0672			0.0016	0.0168	0.058	0.1068	0.058	0.0152	0.0152	0.306
0.0876	0.0136	0.012	0.01	0.0288	0.01			0.0672	0.116	0.0876	0.0292	0.0124	0.526	0.0044	0.0188	0.0008	0.0372	0.0356	0.02	0.0872	0.154		0.0092	0.094	0.0228	0.0108	0.0084	0.0948	0.0584	0.0616	0.0168	0.0112	0.0076	0.0256	0.008	0.0644	0.0092			0.0392	0.0044	0.0396	0.0072	0.004	0.2208	0.9348	0.0212
0.06	0.0864	0.0412	0.014	0.0112	0.0944			0.1504	0.3036	0.084	0.0196	0.0172	0.0072	0.0092	0.0068	0.0064	0.1204	0.0388	0.0212	0.0096	0.028		0.0196	0.1128	0.0124	0.0372	0.0052	0.1128	0.036	0.012	0.0056	0.006	0.0084	0.0004	0.0108	0.0828	0.036			0.0012	0.0024	0.05	0.0076	0.0232	0.0184	0.1252	0.0672
0.0296	0.0376	0.0184	0.0032	0.012	0.0172			0.13	0.0008	0.0204	0.0536	0.0064	0.0264	0.032	0.018	0.0132	0.01	0.024	0.014	0.0128	0.0048		0.0024	0.0704	0.0112	0.1284	8.1244	0.0704	0.0508	0.056	0.0084	0.0192	0.0136	0.004	0.0092	0.0084	0.0224			0.0032	0.0032	0.1728	0.0284	0.0072	0.0248	0.0716	0.0168
0.0192	0.0032	0.076	0.0112	0.014	0.0024			0.002	0.0144	0.0148	0.0092	0.0124	0.0888	0.0156	0.0028	0.0148	0.006	0.026	0.0128	0.0092	0.002		0.0108	5.674	0.0088	0.0032	0.4636	5.6744	0.192	0.0148	0.014	0.01	0.0672	0.0064	0.0392	0.032	0.008			0.178	0.0124	0.0228	0.0032	0.0016	0.002	0.026	0.0268
0.0504	0.0048	0.0528	0.0072	0.014	0.0128			0.008	0.2788	0.0228	0.0248	0.0636	0.076	0.0208	0.0124	0.0176	0.0128	0.0256	0.0224	0.0068	0.0204		0.0176	0.0384	0.0832	0.6936	0.0936	0.0384	0.0052	0.016	0.1016	0.0124	0.0128	0.01	0.016	0.0132	0.0156			0.3624	0.0048	0.0148	0.072	0.0608	0.0004	1.0828	0.0132
0.0192	0.01	0.0388	0.0012	0.0368	0.0016			0.0068	0.0524	0.2836	0.0032	0.0012	0.0344	0.0268	0.0068	0.0056	0.024	0.0108	0.012	0.0376	0.0184		0.118	0.0008	0.014	0.0068	0.1372	0.0008	0.3532	0.0032	1.6384	0.0204	0.0048	0.0128	0.0272	0.0036	0.0564			0.0024	0.0172	0.0484	0.0024	0.0592	0.008	0.0308	0.05
0.0408	0.0104	0.0056	0.0196	0.0164	0.0128			0.004	0.0288	0.006	0.0128	0.016	0.0072	0.0132	0.006	0.0148	0.0012	0.0156	0.01	0.0996	0.0068		0.014	0.0008	0.0088	0.0048	0.038	0.0008	0.2408	0.0012	0.1352	0.0056	0.0672	0.0004	0.0024	0.0084	0.0968			0.0188	0.0044	0.0004	0.0328	0.0556	1.0212	0.02	0.0616
0.048	0.01	0.0036	0.006	0.0044	0.0436			0.2568	0.46	0.14	0.0028	0.018	0.0392	0.0016	0.012	0.142	0.0124	0.0156	0.0196	0.016	0.0536		0.0308	0.0212	0.0064	0.0136	0.0032	0.0212	0.1148	0.0088	0.0016	0.0144	0.0228	0.0136	0.03	0.0136	0.0176			0.548	0.1064	0.0236	0.0064	0.0108	0.3388	0.086	0.0008
0.0004	0.0296	0.0164	0.024	0.0092	0.0512			0.0188	0.0384	0.2052	0.02	1.8272	0.178	0.0268	0.016	0.0132	0.0124	0.0376	0.0084	0.0096	0.0108		0.0584	0.0552	0.0028	0.0148	0.0208	0.0552	0.192	0.0436	0.0196	0.0644	0.012	0.0132	0.0304	0.0124	0.0076			0.0452	0.0012	0.0268	0.0196	0.026	0.0212	0.0116	0.0096
0.0108	0.0128	0.0008	0.0104	0.0456	0.0244			0.0096	0.0932	0.0236	0.0096	0.0036	0.1248	0.0064	0.0292	0.012	0.0132	0.0096	0.0132	0.01	0.0104		0.0244	0.1308	0.016	0.0004	0.0064	0.1308	0.4036	0.02	0.0012	0.0052	0.0368	0.004	0.0204	0.002	0.0032			0.7528	0.048	0.0164	0.044	0.0016	0.0176	0.014	0.0148
0.0004	0.0072	0.0428	0.0164	0.0076	0.0048			0.0028	0.292	0.056	0.0396	0.0172	0.8448	0.0148	0.014	0.192	0.0508	0.018	0.0124	0.0308	0.3052		0.0056	0.034	0.0032	0.0228	0.1512	0.0346	0.0004	0.0128	0.0084	0.0224	0.0184	0.0084	0.0864	0.0164	0.0444			0.028	1.0924	0.206	0.0088	0.0256	0.0004	0.122	0.0148
0.0712	0.0044	0.0252	0.0084	0.0268	0.0132			0.0196	0.55	0.0068	0.0128	0.0328	0.0492	2.1596	0.0284	0.01	0.0084	0.0248	0.012	0.02	0.0128		0.0028	0.2028	0.108	0.01	0.7648	0.2028	0.0344	0.008	0.014	0.012	0.032	0.018	0.0044	0.0148	0.0172			0.0096	0.03	0.0848	0.0072	0.008	0.008	0.0976	0.0136
0.0028	0.028	0.008	0.012	0.6544	0.0108			0.0428	0.0948	0.1972	0.024	0.018	0.9032	0.0164	0.0416	0.0284	0.0008	0.008	0.0092	0.0628	0.0044		0.0212	0.0956	0.064	0.0172	1.3716	0.0956	0.0408	0.0084	0.0124	0.0172	0.006	0.0164	0.0664	0.0068	0.0216			0.0228	0.0452	0.0432	0.1412	0.116	0.1036	0.0232	0.3416
0.004	0.0148	0.0084	0.1244	0.0084	0.0228			0.1592	0.0476	0.0352	0.0312	0.0088	1.0864	0.0228	0.0652	0.01	0.0176	0.1088	0.0344	0.4448	0.0124		0.0168	0.0608	0.2044	0.0012	0.0976	0.0608	0.0856	0.0296	0.0128	0.0208	0.0032	0.0128	0.0124	0.0112	0.072			0.2436	0.0148	0.02	0.0196	0.0112	0.3416	0.0444	0.0128
0.002	0.0156	0.0108	0.0096	0.0792	0.0756			0.0012	0.0076	0.0016	0.5836	0.0264	1.4476	0.1952	0.0396	0.0064	0.0164	0.0088	0.0144	0.1192	0.014		0.018	0.026	0.9856	0.0004	0.04	0.026	0.0184	0.2172	0.0128	0.0084	0.0012	0.01	0.0112	0.0472	0.5904			0.0356	0.0736	2.3104	0.0396	0.114	0.0532	0.0176	0.08
0.0316	0.0172	0.0004	0.0068	0.2248	0.0112			0.0884	0.0016	0.0204	0.002	0.0072	0.0012	0.0472	0.0128	0.0004	0.0068	0.0128	0.0092	0.0056	0.0044		0.1232	0.0124	0.0128	0.0976	0.03	0.0124	0.0168	0.0056	0.0216	0.012	0.012	0.0184	0.008	0.0028	0.0136			0.0012	0.0304	0.006	3.5088	0.0004	0.0144	0.0076	0.0108
0.0036	0.0364	0.0212	0.0164	0.2152	0.026			0.0056	0.0172	0.0036	0.0588	0.0096	0.0212	0.3044	0.01	0.0076	0.0124	0.0092	0.0096	0.0224	0.0012		0.0116	0.0548	0.0096	0.2196	0.0112	0.038	0.0168	0.0284	0.0152	0.0208	0.0392	0.006	0.0424	0.0132	0.1284			0.0008	0.0604	0.0092	0.14	0.0044	0.0208	0.0168	0.0152
0.0048	0.0292	0.0552	0.0112	0.0644	0.0832			0.022	0.0112	0.0252	0.022	0.0124	0.0512	0.0172	0.0092	0.0384	0.016	0.01	0.0148	0.0184	0.012		0.006	0.026	0.0208	0.1196	0.0928	0.0268	1.5776	0.0152	0.0784	0.01	0.0188	0.0916	0.0068	0.0168	0.0292			0.0732	0.0208	0.0052	0.0312	0.2888	0.0144	0.0164	0.0144
0.0012	0.0156	0.0008	0.0912	0.0152	0.012			0.0724	0.0168	0.0328	0.0244	0.0088	0.02	0.0096	0.0004	0.1116	0.0152	0.0288	0.0684	0.0576	0.0024		0.0004	0.02	0.0116	0.0064	1.7488	0.026	0.0012	0.0108	0.022	0.01	0.0176	0.0332	0.0112	0.0364	0.0056			0.0028	0.0116	0.0044	0.0044	0.004	0.0096	0.0336	0.0144
0.0088	0.0248	0.0132	0.01	0.0476	0.0332			0.0136	0.0244	0.0432	1.052	0.0856	0.1604	9.4408	0.0788	0.0172	0.0104	0.0024	0.018	0.0188	0.054		0.0328	0.002	0.3588	0.2156	0.0228	0.002	0.0192	0.0112	0.0536	0.0228	0.0716	0.014	0.0192	0.006	0.0152			0.1424	0.0044	1.46	0.0228	0.0092	0.0124	0.0932	0.0092
0.0024	0.0128	0.0444	0.0028	0.0152	0.0056			0.0028	0.218	0.0116	0.0232	0.032	0.0032	0.0136	0.0504	0.0132	0.0144	0.0092	0.0056	0.0144	0.014		0.0276	0.0004	0.0012	0.7712	0.0256	0.0004	0.0216	0.0372	0.0252	0.0172	0.0892	0.012	0.0256	0.0172	0.0212			0.002	0.0168	0.0308	0.0516	0.0308	0.046	0.0016	0.0108
0.0068	0.0028	0.0252	0.0084	0.168	0.0744			0.096	0.0116	0.0116	0.0516	0.0576	0.0056	0.1284	0.012	0.0176	0.0272	0.0068	0.0152	0.0428	0.01		0.0108	0.0092	0.0056	0.018	0.0112	0.0092	0.0464	0.0052	0.0096	0.0036	0.0192	0.0072	0.0192	0.0008	0.0968			0.014	0.014	0.3724	0.8476	0.0016	0.0016	0.1816	0.0132
0.0184	0.0084	0.0076	0.0136	0.01	0.04			0.2448	0.0008	0.0768	0.016	0.0048	0.0956	0.0108	0.0144	0.042	0.0128	0.0348	0.008	0.054	0.0068		0.0016	0.032	0.0172	0.006	0.0248	0.0324	0.1568	0.0084	0.0108	0.0124	0.0116	0.008	0.0212	0.0068	0.0092			0.01	0.0068	0.0088	0.0056	0.012	0.0088	0.0028	0.0032
0.006	0.004	0.0164	0.0124	0.0092	0.0128			0.2832	0.2456	0.014	0.0548	0.042	0.0052	0.0176	0.0096	0.044	0.0008	0.028	0.01	0.0032	0.0092		0.0404	0.0288	0.0016	0.038	0.0028	0.0288	0.0028	0.1496	0.0112	0.0128	0.056	0.0492	0.02	0.012	0.0184			0.108	0.0056	0.4176	0.0252	0.0072	0.0112	0.0316	0.0168
0.0236	0.0068	0.0952	0.0108	0.0096	0.0508			0.0048	0.0008	0.01	0.032	0.0648	0.0092	0.0004	0.018	0.0116	0.0428	0.0496	0.0148	0.0264	0.0592		0.0156	0.1524	0.0092	0.0012	0.0316	0.1524	0.0116	0.0004	0.0552	0.0004	0.016	0.0472	0.0084	0.0424	0.0088			0.028	0.0112	0.0396	0.0076	0.0016	0.0684	0.0376	0.114
0.0132	0.016	0.1444	0.0108	0.002	0.0228			0.5764	0.026	0.0192	0.01	0.01	0.3092	0.0072	0.0212	0.016	0.0644	0.0488	0.0136	0.0128	0.004		0.0372	0.0044	0.0332	0.2956	0.0016	0.0044	0.1748	0.014	0.0188	0.0056	0.0104	0.0368	0.0168	0.0064	0.068			0.018	0.4352	0.0324	0.0004	0.01	0.0224	0.0244	0.0032
0.0056	0.0056	0.0092	0.0048	0.0904	0.072			0.012	0.3432	0.1048	0.0032	0.102	1.7116	0.0212	0.004	0.0164	0.0132	0.0168	0.016	0.0076	0.018		0.012	0.0032	0.0264	0.1128	0.0204	0.022	0.1212	0.0496	0.0192	0.0324	0.0148	0.014	0.018	0.0056	1.0244			0.2864	0.3664	0.372	0.3284	0.0336	0.0056	0.782	0.0104
0.0084	0.0592	0.01	0.0144	0.0124	0.0156			0.0036	0.0016	0.1944	0.0116	0.0728	0.0008	0.0544	0.0168	0.0204	0.0432	0.0216	0.0416	0.0044	0.0136		0.0116	0.11	0.0244	0.0416	0.0872	0.1184	0.0604	0.028	0.0096	0.0216	0.014	0.0128	0.0112	0.0184	0.0024			0.0352	0.1244	0.0196	0.0196	0.0328	0.0432	0.0108	0.0044
0.0268	0.1836	0.0072	0.0324	0.0184	0.0128			0.0244	0.0616	0.01	0.1036	0.0032	0.3172	0.01	0.0984	0.1184	0.0088	0.0092	0.0184	0.0052	0.072		0.0888	0.0188	0.0016	0.0004	0.0336	0.0188	0.0312	0.0212	0.01	0.0316	0.2188	0.014	0.0496	0.0196	0.0188			0.0656	0.0104	0.0008	0.0136	0.0028	0.0084	0.732	0.0444
0.3228	0.0188	0.0268	0.0132	0.1428	0.0128			0.16	0.2092	0.0116	0.0476	0.0048	0.3996	0.0196	0.0048	0.0112	0.006	0.01	0.0092	0.0924	0.004		0.0792	0.0908	0.22	0.0084	0.0704	0.0908	0.034	0.0252	0.0192	0.01	0.0064	0.0116	0.0188	0.0152	0.012			0.02	0.1396	2.4196	0.0084	0.0004	0.0284	0.0824	0.0128
0.028	0.01	0.004	0.0196	0.0072	0.0028			0.0328	0.0664	0.0008	0.3288	0.0724	0.0168	0.0132	0.0028	0.0028	0.0004	0.01	0.0372	0.1884	0.0104		0.0072	0.1176	0.0024	0.0112	0.0908	0.1176	0.0036	0.03	0.0008	0.0036	0.0188	0.0488	0.012	0.0124	0.0152			0.396	0.0328	2.4448	0.0484	0.1132	0.018	0.3516	0.0612
0.0056	0.0272	0.0044	0.0164	0.0124	0.0016			0.0004	0.0148	0.0044	0.01	0.4832	0.0528	0.01	0.0132	0.0532	0.0204	0.0004	0.0404	0.0128	0.036		0.0292	0.05	0.3456	0.0784	0.0348	0.0572	0.002	0.1264	0.0132	0.0256	0.0136	0.0092	0.0144	0.0168	0.0044			0.0216	0.0908	0.06	0.1824	0.0068	0.1956	0.0176	0.0492
0.0268	0.01	0.0168	0.004	0.0164	0.0324			0.6696	0.004	0.0208	0.0512	0.016	0.0076	0.0276	0.0068	0.0564	0.016	0.0096	0.006	0.0236	0.0132		0.004	0.0596	0.0156	0.0248	1.3764	0.0596	0.3476	0.0024	4.812	0.0188	0.052	0.0128	0.0104	0.0188	0.0396			0.004	0.0048	0.42	0.016	0.0288	0.0004	0.0132	0.0096
0.0044	0.0268	0.0152	0.0136	0.0036	0.0676			0.0216	0.022	0.0896	0.0036	0.0084	0.2348	0.0108	0.0528	0.0236	0.012	0.026	0.0572	0.0204	0.046		0.0056	0.428	0.5312	0.0152	0.1484	0.428	0.0092	0.0004	0.2028	0.0112	0.03	0.0128	0.0272	0.0036	0.0108			0.0384	0.0336	0.0172	0.0532	2.9788	0.0088	0.012	0.0804
0.042	0.0084	0.01	0.0008	0.0212	0.0128			0.04	0.0004	0.14	0.5832	0.014	0.0388	0.0068	0.0012	0.0116	0.0344	0.0292	0.0096	0.0124	0.038		0.2256	0.0696	0.0576	0.054	0.0284	0.0696	0.0116	0.0016	0.0132	0.0152	0.0908	0.0088	0.0192	0.0244	0.0188			0.04	0.0564	0.0156	0.8392	0.0056	0.0084	0.0032	0.0112
0.0004	0.01	0.0016	0.012	0.1528	0.0184			1.4312	0.0244	0.0116	0.054	0.0144	0.0144	0.05	0.0128	0.0544	0.0084	0.0084	0.0044	0.0212	0.024		0.0064	0.0352	0.0024	0.0028	0.0732	0.0352	0.0236	0.016	0.0132	0.0152	0.052	0.152	0.02	0.0044	0.0104			0.0272	0.0448	0.0328	0.0132	0.0012	0.0144	0.054	0.0028
0.0452	0.03	0.1296	0.0116	0.0164	0.0128			0.0408	0.3112	2.2108	0.0908	0.002	0.0912	0.0184	0.0492	0.0092	0.0444	0.002	0.0024	0.0004	0.0112		0.01	0.0004	0.096	0.1436	0.1312	0.0004	1.828	0.0912	0.026	0.0056	0.0164	0.0148	0.0712	0.0276	0.0008			0.0008	0.0192	0.0032	0.002	0.0392	0.0128	0.208	0.0056
0.0172	0.0288	0.0168	0.0112	0.0304	0.072			0.0064	0.0448	0.0708	0.2968	0.0168	0.0048	0.0112	0.1084	0.154	0.0004	0.036	0.0104	0.0108	0.0268		0.0216	0.0016	0.0332	0.0128	0.0196	0.0016	0.2396	0.0024	0.0128	0.01	0.0172	0.0232	0.0552	0.0364	0.0068			0.0124	0.0012	0.0192	0.0028	0.0056	0.066	0.0308	0.0056
0.002	0.0136	0.002	0.0128	0.0656	0.03			2.136	0.554	0.0748	0.5804	0.028	0.1288	0.802	0.0072	0.0076	0.008	0.0044	0.0116	0.01	0.0032		0.0116	0.0056	0.0012	0.0416	0.0048	0.0056	0.046	0.0116	0.0112	0.0088	0.0464	0.0072	0.0096	0.014	0.01			0.0152	0.0084	0.0472	0.0056	0.024	0.9032	0.0504	0.0484
0.0072	0.02	0.0232	0.006	0.0156	0.0116			0.0748	0.02	0.032	0.0104	0.0596	0.016	0.0064	0.0628	0.0396	0.0088	0.01	0.0104	0.0116	0.0432		0.0064	0.0708	0.0124	0.0572	0.3332	0.002	0.0024	0.204	11.4476	0.002	0.0012	0.0384	0.0116	0.012	0.0328			0.0748	0.0492	0.2452	0.0064	0.0424	0.0192	0.0104	0.0264
0.004	0.0152	0.0124	0.0084	0.0312	0.0112			0.0532	0.0064	0.006	0.0248	0.0072	0.0072	0.2312	0.0248	0.0192	0.01	0.0072	0.014	0.0588	0.012		0.0616	0.3976	0.0064	0.0028	0.194	0.3976	0.0088	0.0064	0.0164	0.3884	0.0032	0.0116	0.0084	0.0124	0.0088			1.4928	0.0196	0.0112	0.3472	0.0072	0.1484	0.0948	1.6832
0.0112	0.0052	0.0024	0.1732	0.0584	0.0052			0.0128	0.0224	0.008	0.0144	0.0192	0.0248	0.0152	0.0108	0.1944	0.0092	0.0212	0.0304	0.2912	0.0004		0.1012	0.0012	0.1148	0.0848	0.042	0.012	0.0236	0.0364	0.0152	0.0004	0.0212	0.0304	0.0116	0.0092	0.0024			0.0152	0.0348	0.8596	0.04	0.0144	0.0196	0.0624	0.0148
0.0408	0.0264	0.006	0.0124	0.0388	0.042			0.0008	0.0012	0.0088	0.0092	0.0152	0.0132	0.1516	0.068	0.0416	0.0128	0.1472	0.012	0.0184	0.01		0.0048	0.0024	0.036	0.0076	0.0128	0.0024	0.4508	0.05	0.2236	0.0664	0.4332	0.0192	0.0164	0.012	0.0052			0.0756	0.0056	1.2888	0.0792	0.0028	0.0028	0.0004	0.082
0.0136	0.006	0.0016	0.012	0.0196	0.036			0.004	0.0532	0.014	0.0084	2.2288	0.0184	0.1416	0.0516	0.0088	0.0088	0.0016	0.0008	0.0188	0.0148		0.016	0.7428	0.0148	0.0136	0.0044	0.7428	0.0096	0.0784	0.002	0.0072	0.0096	0.0228	0.0212	0.0068	0.006			0.3656	0.012	0.0108	0.0004	0.0388	0.05	0.0016	0.0048
0.0752	0.0196	0.0152	0.0128	0.0052	0.0512			0.2148	3.6272	0.1784	0.1764	0.0288	0.1336	0.004	0.0452	0.0756	0.024	0.0048	0.014	0.0116	0.0004		0.018	0.05	0.0452	0.0748	0.0048	0.0528	0.3564	0.0052	0.0004	0.05	0.0216	0.0096	0.016	0.0184	0.0068			0.004	0.0148	0.0008	0.0472	0.0296	0.008	0.0692	0.024
0.1408	0.0164	0.078	0.0052	0.0144	0.0096			0.0036	0.008	0.014	0.0524	0.0112	0.002	0.2724	0.3136	0.022	0.0112	0.01	0.0052	0.0048	0.0716		0.0116	0.0872	0.0004	0.0324	0.0172	0.002	0.0464	0.1228	0.0004	0.1076	0.0132	0.012	0.0092	0.0104	0.0016			0.0028	0.0044	0.0344	0.1648	0.244	0.0272	0.0072	0.0012
0.0136	0.0108	0.068	0.0032	0.0168	0.0076			0.0292	0.028	0.0256	0.0296	0.0136	0.4164	0.0144	0.012	0.0584	0.0112	0.0136	0.0068	0.0012	0.0116		0.014	0.0496	0.0124	0.0032	0.2216	0.0496	0.1208	0.0204	0.0424	0.0132	0.0076	0.016	0.026	0.0476	0.0012			0.1072	0.03	0.874	0.0612	0.0184	0.0196	0.1224	0.0164
0.0444	0.0128	0.0224	0.3852	0.0052	0.024			0.006	0.0492	0.2268	0.0028	0.0172	0.01	0.0016	0.0088	0.0036	0.0224	0.094	0.0096	0.024	0.1188		0.038	0.03	0.0804	0.048	0.024	0.0376	0.0056	1.3836	0.0132	0.318	0.01	0.0324	0.0116	0.0132	0.0008			0.0488	0.0016	0.1896	0.0036	0.0608	0.0328	0.0688	0.0172
0.0132	0.03	0.0116	0.0032	0.1144	0.0004			0.0332	0.0248	0.0144	0.004	0.2148	2.9756	0.0264	0.0076	0.0076	0.0148	0.0164	0.0168	0.0224	0.0128		0.0256	0.6464	0.01	0.006	0.0268	0.6464	0.0064	0.0172	0.0016	0.0144	0.0036	0.0124	0.0092	0.012	0.0596			0.1044	0.004	0.0416	0.046	0.0016	0.0804	0.0012	0.0004
0.0136	0.0152	0.026	0.0132	0.5328	0.0248			0.0264	0.1684	0.0192	0.0368	0.03	0.0036	0.1296	0.0168	0.0484	0.0284	0.01	0.01	0.0296	0.0056		0.0036	0.7212	0.0012	0.0396	0.0212	0.228	0.0816	0.0176	0.004	0.0116	0.0116	0.016	0.0608	0.0228	0.0044			0.0004	0.0508	0.0188	0.0256	0.0332	0.4592	0.0084	0.26
0.0016	0.1168	0.012	0.0076	0.002	0.0176			0.0016	0.0228	0.0144	0.0472	0.0396	0.0084	0.61	0.3976	0.0168	0.0116	0.0128	0.0084	0.0092	0.0152		0.024	0.15	0.0168	0.002	0.0064	0.1532	0.0388	0.0036	0.048	0.008	0.006	0.0444	0.014	0.0108	0.0236			0.0028	0.04	0.3776	0.022	0.0532	0.116	0.0136	0.014
0.01	0.0632	0.0496	0.0152	0.018	0.022			0.0056	0.0832	0.0056	0.0176	0.0528	0.1556	0.01	0.018	0.008	0.0124	0.0096	0.0176	0.0256	0.0212		0.0072	0.0308	0.0184	0.0096	0.0176	0.0308	0.2204	0.0004	0.0456	2.2396	0.0124	0.0112	0.016	0.0036	0.004			0.1476	0.0024	0.0688	0.0052	0.0008	0.0024	0.0236	0.1988
0.0328	0.0204	0.0796	0.0096	0.0116	0.0028			0.07	0.0024	0.1096	1.1476	0.0024	0.0164	0.014	0.0108	0.0108	0.0096	0.1952	0.0192	0.0004	0.01		0.0212	1.0016	0.1888	0.1448	0.022	1.0016	0.3524	0.008	0.0128	0.0068	0.0248	0.012	0.0712	0.0092	0.0368			0.0064	0.0028	0.0764	0.0072	0.0008	0.0028	0.0108	0.03
0.0188	0.0092	0.0024	0.0136	0.0136	0.0016			0.2452	0.0048	0.1112	0.014	0.126	0.0212	0.0176	0.0124	0.0104	0.0104	0.106	0.0704	0.0108	0.0552		0.0124	0.0196	0.0308	0.4236	0.0208	0.0196	1.9064	0.0384	0.0088	0.0116	0.0128	0.0112	0.0388	0.0476	0.0048			0.0428	0.0108	0.1096	0.0036	0.0076	0.0004	0.0248	0.0348
0.0252	0.0136	0.0276	0.0396	0.0524	0.0148			0.0004	0.0772	0.3976	0.0084	0.0108	0.0216	0.0116	0.0392	0.0112	0.0144	0.0164	0.2652	0.0144	0.0068		0.0008	0.85	0.0832	0.002	0.264	0.8548	0.2536	0.0344	0.002	0.01	0.0004	0.0112	0.034	0.0136	0.0104			0.1124	0.0324	0.0008	0.0168	0.0056	0.0076	0.0016	0.0408
0.0068	0.1216	0.0164	0.0104	0.016	0.0248			0.0008	0.0236	0.0076	0.0124	0.2796	0.0048	0.028	0.0112	0.0056	0.0012	0.0176	0.0072	0.1436	0.0164		0.0044	0.0704	0.146	0.0776	0.628	0.0704	0.0044	0.0244	0.0128	0.0132	0.012	0.0248	0.036	0.0132	0.0104			0.2432	0.0128	0.0088	0.0088	0.01	0.0004	0.0012	0.0172
0.0132	0.016	0.0356	0.0204	0.4292	0.0032			0.0004	0.0028	0.0332	0.1168	0.0024	0.0276	0.0236	0.0284	0.002	0.0884	0.0188	0.0464	0.0012	0.0016		0.0152	0.2268	0.126	0.0736	0.4516	0.2268	0.0952	0.002	0.1296	0.0096	0.0196	0.0044	0.02	0.0092	0.154			0.5588	0.0028	0.0096	0.0048	0.0536	0.0176	0.0172	0.0328
0.0012	0.076	0.0064	0.0188	0.0024	0.026			0.0056	0.0596	0.1644	0.0008	0.0072	0.254	0.0152	0.02	0.0164	0.0104	0.0096	0.0496	0.1048	0.0048		0.038	0.0248	1.4516	0.156	0.0336	0.0248	3.9496	0.0456	0.01	0.0076	0.0112	0.2132	0.0168	0.0104	0.0036			0.0388	0.1192	0.0332	0.43	0.028	0.032	0.0148	0.0196
0.0384	0.0104	0.04	0.0888	0.034	0.0128			0.018	0.1328	0.008	0.0116	0.0336	0.0028	0.0304	0.0264	0.0472	0.0076	0.028	0.0376	0.0208	0.0188		0.0012	0.0612	0.0028	0.026	0.016	0.0612	0.2268	0.0104	0.0248	0.0128	0.0072	0.0076	0.0092	0.0844	0.0216			0.006	0.0688	0.0144	0.026	7.628	0.006	0.014	0.0412
0.0044	0.01	0.0096	0.0096	0.0228	0.012			0.0008	0.0028	0.016	0.0624	0.3932	0.0116	0.0192	0.0188	0.0008	0.0152	0.0052	0.0644	0.0108	0.032		0.1848	0.0804	0.0188	0.04	0.0048	0.014	0.0288	0.0532	0.0648	0.0116	0.0452	0.014	0.0252	0.0128	0.1812			0.14	0.0196	0.024	0.0268	0.0412	0.082	0.0248	0.0008
0.0124	0.0044	0.0356	0.0084	0.0064	0.0128			0.6432	0.0196	0.0332	0.0028	0.05	0.0928	0.002	0.0084	0.0704	0.0192	0.0108	0.018	0.0068	0.0316		0.012	0.0392	0.018	0.0112	0.0768	0.0392	3.1644	0.0072	0.018	0.0128	0.0184	0.016	0.0136	0.0436	0.0292			0.0076	0.006	0.0072	0.0308	0.0024	0.0076	0.0244	0.0264
0.0152	0.0108	0.0104	0.0004	0.0008	0.0604			0.35	0.0084	0.0216	0.0272	2.8868	0.0144	0.0036	0.0124	0.0128	0.0076	0.0152	0.0252	0.0052	0.016		0.0068	0.0192	0.0044	0.0108	0.0196	0.022	0.0676	0.014	0.0836	0.014	0.0888	0.01	0.0584	0.0088	0.018			0.0828	0.0472	0.0004	0.0016	0.3532	1.4536	0.0116	0.0052
0.056	0.0108	0.0068	0.0368	0.0176	0.0004			0.0012	0.0192	0.2756	0.0188	0.0008	0.0448	0.0096	0.0536	0.0012	0.0108	0.002	0.0044	0.0016	0.0116		0.0116	0.086	0.0632	0.044	0.1616	0.0866	0.8972	0.0052	0.0036	0.0204	0.0096	0.016	0.0136	0.0008	0.0132			0.6992	0.0008	0.0092	0.31	0.0288	0.026	0.0348	0.006
0.0096	0.0148	0.0024	0.012	0.0104	0.002			0.0004	0.0212	0.0148	0.2444	0.002	0.0148	0.0088	0.0796	0.0152	0.0084	0.0136	0.0212	0.014	0.024		0.0124	0.366	0.0172	0.0212	0.1428	0.3664	0.0252	0.3428	3.436	0.0116	0.0108	0.0344	0.0152	0.0032	0.2552			0.0008	0.0028	0.0452	0.0184	0.0084	0.0036	0.0568	0.0088
0.006	0.0148	0.0088	0.0072	0.02	0.0168			0.0008	0.008	0.0172	14.2024	0.0188	0.0128	0.0192	0.0076	0.0208	0.0112	0.0084	0.01	0.018	0.01		0.1756	0.006	0.0016	0.0408	0.002	0.0068	0.0336	0.5144	0.0124	0.0084	0.0032	0.0076	0.0132	0.002	0.016			0.0084	0.01	0.036	0.8252	0.1336	0.0288	0.4196	0.006
0.0376	0.0112	0.0316	0.0128	0.0132	0.004			0.1932	0.0788	0.2212	0.3184	0.0204	0.0172	0.0192	0.1288	0.0008	0.0072	0.0076	0.0048	0.0116	0.0088		0.264	0.9924	0.0688	0.0252	0.0204	0.9924	0.0236	0.0124	0.0232	0.0144	0.0152	0.0256	0.034	0.0124	0.0092			0.1392	0.0176	0.0072	1.0728	1.182	0.0312	0.1776	0.024
0.008	0.0224	0.01	0.0168	0.0012	0.07			0.0464	0.0452	0.0124	0.0112	0.0004	0.0084	0.0112	0.006	0.0136	0.0112	0.0032	0.0268	0.0124	0.0116		0.0164	0.0024	0.0848	0.072	0.0152	0.046	0.02	0.0268	0.046	0.01	0.0044	0.0356	0.0232	0.0016	0.0652			0.1184	0.0736	0.006	0.122	0.024	0.0324	0.014	0.048
0.0036	0.0256	0.0472	0.0356	0.014	0.0132			0.0576	0.0508	0.0856	0.0032	0.13	0.0192	0.0344	0.0164	0.0008	0.0144	0.022	0.0064	0.0008	0.0112		0.0196	0.0068	0.116	0.0164	0.0008	0.0068	0.136	0.0072	0.1492	0.0196	0.0276	0.006	0.0168	0.0688	0.0248			0.0692	0.1348	0.068	0.008	0.0072	0.024	0.0704	0.016
0.132	0.0052	0.0012	0.0012	0.048	0.0148			0.2232	0.0056	0.3088	0.054	0.0388	0.0468	0.0124	0.0144	0.0972	0.012	0.0268	0.0056	0.0284	0.0052		0.0388	0.0044	0.0116	0.0124	0.0348	0.0044	0.1124	0.022	0.0004	0.0112	0.0152	0.0096	0.004	0.008	0.0084			0.0092	0.006	0.1808	0.06	0.3272	1.1688	0.0296	0.0408
0.0124	0.0656	0.012	0.0716	0.0556	0.01			0.0004	0.0252	0.8832	0.5236	0.0416	0.0156	0.0128	0.0092	0.0528	0.0032	0.0128	0.012	0.012	0.0348		0.0092	0.0192	0.854	0.0336	0.0024	0.0192	0.0704	0.0468	0.0224	0.0072	0.0124	0.0412	0.0268	0.0576	0.0152			0.0096	0.2336	0.0012	0.1628	0.014	0.0164	0.0064	0.0116
0.0692	0.0236	0.024	0.0308	0.0124	0.018			0.03	0.0016	0.0144	0.0004	0.012	0.008	0.0024	0.0096	0.0016	0.01	0.056	0.0292	0.0088	0.0268		0.006	1.0568	0.0104	0.09	0.2268	1.0568	1.4308	0.0008	0.0004	0.006	0.194	0.0636	0.0024	0.022	0.0052			0.0004	0.0136	0.0004	0.0564	0.0012	0.0448	0.0076	0.0208
[truncated: 12,421 more rows]
