# Supplementary material for: Caveolin-1 protects endothelial cells from extensive expansion of transcellular tunnel by stiffening the plasma membrane
Source: eLife. 2024 Mar 22;12:RP92078. doi: 10.7554/eLife.92078 (PMC10959525; doi:10.7554/eLife.92078)
Supplement: Figure 3—source data 1. [file elife-92078-fig3-data1.xlsx]

## Sheet: Figure 3C 
CellID	Experiment	siTreatment	Toxin	Condition	Area
1	SPD 1	siCAV1	Tox-	siCAV 1/-	20362.1
2	SPD 1	siCAV1	Tox-	siCAV 1/-	8323.42
3	SPD 1	siCAV1	Tox-	siCAV 1/-	9948.03
4	SPD 1	siCAV1	Tox-	siCAV 1/-	18383.7
5	SPD 1	siCAV1	Tox-	siCAV 1/-	16117.7
6	SPD 1	siCAV1	Tox-	siCAV 1/-	8494.2
7	SPD 1	siCAV1	Tox-	siCAV 1/-	6334.47
8	SPD 1	siCAV1	Tox-	siCAV 1/-	34712.4
9	SPD 1	siCAV1	Tox-	siCAV 1/-	5272.93
10	SPD 1	siCAV1	Tox-	siCAV 1/-	5803.16
11	SPD 1	siCAV1	Tox-	siCAV 1/-	2486.33
12	SPD 1	siCAV1	Tox-	siCAV 1/-	4312.99
13	SPD 1	siCAV1	Tox-	siCAV 1/-	6398.27
14	SPD 1	siCAV1	Tox-	siCAV 1/-	6636.21
15	SPD 1	siCAV1	Tox-	siCAV 1/-	8151.43
16	SPD 1	siCAV1	Tox-	siCAV 1/-	6164.45
17	SPD 1	siCAV1	Tox-	siCAV 1/-	6472.59
18	SPD 1	siCAV1	Tox-	siCAV 1/-	16680.6
19	SPD 1	siCAV1	Tox-	siCAV 1/-	34903.6
20	SPD 1	siCAV1	Tox-	siCAV 1/-	6504.74
21	SPD 1	siCAV1	Tox-	siCAV 1/-	5742.09
22	SPD 1	siCAV1	Tox-	siCAV 1/-	2319.6
23	SPD 1	siCAV1	Tox-	siCAV 1/-	2992.2
24	SPD 1	siCAV1	Tox-	siCAV 1/-	38794.3
25	SPD 1	siCAV1	Tox-	siCAV 1/-	5582.85
26	SPD 1	siCAV1	Tox-	siCAV 1/-	3473.98
27	SPD 1	siCAV1	Tox-	siCAV 1/-	4629.88
28	SPD 1	siCAV1	Tox-	siCAV 1/-	13886.7
29	SPD 1	siCAV1	Tox-	siCAV 1/-	6293.5
30	SPD 1	siCAV1	Tox-	siCAV 1/-	4801.49
31	SPD 1	siCAV1	Tox-	siCAV 1/-	3035.07
32	SPD 1	siCAV1	Tox-	siCAV 1/-	33287.6
33	SPD 1	siCAV1	Tox-	siCAV 1/-	8784.33
34	SPD 1	siCAV1	Tox-	siCAV 1/-	9523.01
35	SPD 1	siCAV1	Tox-	siCAV 1/-	6519.52
36	SPD 1	siCAV1	Tox-	siCAV 1/-	19582
37	SPD 1	siCAV1	Tox-	siCAV 1/-	14108.4
38	SPD 1	siCAV1	Tox-	siCAV 1/-	5392.09
39	SPD 1	siCAV1	Tox-	siCAV 1/-	14179.3
40	SPD 1	siCAV1	Tox-	siCAV 1/-	5155.93
41	SPD 1	siCAV1	Tox-	siCAV 1/-	3552.43
42	SPD 1	siCAV1	Tox-	siCAV 1/-	3917.14
43	SPD 1	siCAV1	Tox-	siCAV 1/-	35642.1
44	SPD 1	siCAV1	Tox-	siCAV 1/-	12760.3
45	SPD 1	siCAV1	Tox-	siCAV 1/-	7340.07
46	SPD 1	siCAV1	Tox-	siCAV 1/-	7372.35
47	SPD 1	siCAV1	Tox-	siCAV 1/-	8087.25
48	SPD 1	siCAV1	Tox-	siCAV 1/-	9352.48
49	SPD 1	siCAV1	Tox-	siCAV 1/-	5606.32
50	SPD 1	siCAV1	Tox-	siCAV 1/-	34805.1
51	SPD 1	siCAV1	Tox-	siCAV 1/-	12720.9
52	SPD 1	siCAV1	Tox-	siCAV 1/-	3375.31
53	SPD 1	siCAV1	Tox-	siCAV 1/-	6038.12
54	SPD 1	siCAV1	Tox-	siCAV 1/-	11813
55	SPD 1	siCAV1	Tox-	siCAV 1/-	20503.5
56	SPD 1	siCAV1	Tox-	siCAV 1/-	7176.71
57	SPD 1	siCAV1	Tox-	siCAV 1/-	5971.98
58	SPD 1	siCAV1	Tox-	siCAV 1/-	3440.05
59	SPD 1	siCAV1	Tox-	siCAV 1/-	20795
60	SPD 1	siCAV1	Tox-	siCAV 1/-	6897.49
61	SPD 1	siCAV1	Tox-	siCAV 1/-	6008.51
62	SPD 1	siCAV1	Tox-	siCAV 1/-	10700.2
63	SPD 1	siCAV1	Tox-	siCAV 1/-	19818.8
64	SPD 1	siCAV1	Tox-	siCAV 1/-	3116.82
65	SPD 1	siCAV1	Tox-	siCAV 1/-	6794.75
66	SPD 1	siCAV1	Tox-	siCAV 1/-	22870
67	SPD 1	siCAV1	Tox-	siCAV 1/-	7198.21
68	SPD 1	siCAV1	Tox-	siCAV 1/-	8946.55
69	SPD 1	siCAV1	Tox-	siCAV 1/-	3910.93
70	SPD 1	siCAV1	Tox-	siCAV 1/-	20454.2
71	SPD 1	siCAV1	Tox-	siCAV 1/-	3647.43
72	SPD 1	siCAV1	Tox-	siCAV 1/-	6271.12
73	SPD 1	siCAV1	Tox-	siCAV 1/-	19528.9
74	SPD 1	siCAV1	Tox-	siCAV 1/-	5777.92
75	SPD 1	siCAV1	Tox-	siCAV 1/-	5496.16
76	SPD 1	siCAV1	Tox-	siCAV 1/-	17417.1
77	SPD 1	siCAV1	Tox-	siCAV 1/-	6267.12
78	SPD 1	siCAV1	Tox-	siCAV 1/-	4471.41
79	SPD 1	siCAV1	Tox-	siCAV 1/-	6959.44
80	SPD 1	siCAV1	Tox-	siCAV 1/-	5502.57
81	SPD 1	siCAV1	Tox-	siCAV 1/-	11157.6
82	SPD 1	siCAV1	Tox-	siCAV 1/-	5304.2
83	SPD 1	siCAV1	Tox-	siCAV 1/-	30123.6
84	SPD 1	siCAV1	Tox-	siCAV 1/-	3543.36
85	SPD 1	siCAV1	Tox-	siCAV 1/-	2546.26
86	SPD 1	siCAV1	Tox-	siCAV 1/-	3322.67
87	SPD 1	siCAV1	Tox-	siCAV 1/-	2922.57
88	SPD 1	siCAV1	Tox-	siCAV 1/-	17024.3
89	SPD 1	siCAV1	Tox-	siCAV 1/-	8680.39
90	SPD 1	siCAV1	Tox-	siCAV 1/-	9940.23
91	SPD 1	siCAV1	Tox-	siCAV 1/-	3774.2
92	SPD 1	siCAV1	Tox-	siCAV 1/-	3785.3
93	SPD 1	siCAV1	Tox-	siCAV 1/-	3341.76
94	SPD 1	siCAV1	Tox-	siCAV 1/-	3206.36
95	SPD 1	siCAV1	Tox-	siCAV 1/-	3907.5
96	SPD 1	siCAV1	Tox-	siCAV 1/-	9356.29
97	SPD 1	siCAV1	Tox-	siCAV 1/-	3360.28
98	SPD 1	siCAV1	Tox-	siCAV 1/-	3194.88
99	SPD 1	siCAV1	Tox-	siCAV 1/-	4645.29
100	SPD 1	siCAV1	Tox-	siCAV 1/-	5065.43
101	SPD 1	siCAV1	Tox-	siCAV 1/-	4265.36
102	SPD 1	siCAV1	Tox-	siCAV 1/-	4829.46
103	SPD 1	siCAV1	Tox-	siCAV 1/-	5094.67
104	SPD 1	siCAV1	Tox-	siCAV 1/-	5646.4
105	SPD 1	siCAV1	Tox-	siCAV 1/-	2431.28
106	SPD 1	siCAV1	Tox-	siCAV 1/-	2433.44
107	SPD 1	siCAV1	Tox-	siCAV 1/-	12487.2
108	SPD 1	siCAV1	Tox-	siCAV 1/-	5988.21
109	SPD 1	siCAV1	Tox-	siCAV 1/-	8492.42
110	SPD 1	siCAV1	Tox-	siCAV 1/-	2096.12
111	SPD 1	siCAV1	Tox-	siCAV 1/-	3545.77
112	SPD 1	siCAV1	Tox-	siCAV 1/-	4869.98
113	SPD 1	siCAV1	Tox-	siCAV 1/-	33684.4
114	SPD 1	siCAV1	Tox-	siCAV 1/-	4560.38
115	SPD 1	siCAV1	Tox-	siCAV 1/-	3302.88
116	SPD 1	siCAV1	Tox-	siCAV 1/-	7261.25
117	SPD 1	siCAV1	Tox-	siCAV 1/-	4262.26
118	SPD 1	siCAV1	Tox-	siCAV 1/-	20863.3
119	SPD 1	siCAV1	Tox-	siCAV 1/-	2341.67
120	SPD 1	siCAV1	Tox-	siCAV 1/-	5841.91
121	SPD 1	siCAV1	Tox-	siCAV 1/-	8926.7
122	SPD 1	siCAV1	Tox-	siCAV 1/-	2450.56
123	SPD 1	siCAV1	Tox-	siCAV 1/-	7254.14
124	SPD 1	siCAV1	Tox-	siCAV 1/-	3522.62
125	SPD 1	siCAV1	Tox-	siCAV 1/-	10167.8
126	SPD 1	siCAV1	Tox-	siCAV 1/-	11890.2
127	SPD 1	siCAV1	Tox-	siCAV 1/-	6658.34
128	SPD 1	siCAV1	Tox-	siCAV 1/-	7820.65
129	SPD 1	siCAV1	Tox-	siCAV 1/-	8511.89
130	SPD 1	siCAV1	Tox-	siCAV 1/-	21211.7
131	SPD 1	siCAV1	Tox-	siCAV 1/-	12718.5
132	SPD 1	siCAV1	Tox-	siCAV 1/-	19335
133	SPD 1	siCAV1	Tox-	siCAV 1/-	14258.1
134	SPD 1	siCAV1	Tox-	siCAV 1/-	18680.4
135	SPD 1	siCAV1	Tox-	siCAV 1/-	5830.11
136	SPD 1	siCAV1	Tox-	siCAV 1/-	8738.29
137	SPD 1	siCAV1	Tox-	siCAV 1/-	9102.62
138	SPD 1	siCAV1	Tox-	siCAV 1/-	4547.19
139	SPD 1	siCAV1	Tox-	siCAV 1/-	11440
140	SPD 1	siCAV1	Tox-	siCAV 1/-	3218.1
141	SPD 1	siCAV1	Tox-	siCAV 1/-	4154.89
142	SPD 1	siCAV1	Tox-	siCAV 1/-	30522.5
143	SPD 1	siCAV1	Tox-	siCAV 1/-	8314.35
144	SPD 1	siCAV1	Tox-	siCAV 1/-	4351.1
145	SPD 1	siCAV1	Tox-	siCAV 1/-	7965.62
146	SPD 1	siCAV1	Tox-	siCAV 1/-	8512.78
147	SPD 1	siCAV1	Tox-	siCAV 1/-	21656.7
148	SPD 1	siCAV1	Tox-	siCAV 1/-	8937.42
149	SPD 1	siCAV1	Tox-	siCAV 1/-	5919.6
150	SPD 1	siCAV1	Tox-	siCAV 1/-	13544.1
151	SPD 1	siCAV1	Tox-	siCAV 1/-	3185.69
152	SPD 1	siCAV1	Tox-	siCAV 1/-	7897.95
153	SPD 1	siCAV1	Tox-	siCAV 1/-	9389.2
154	SPD 1	siCAV1	Tox-	siCAV 1/-	3433.84
155	SPD 1	siCAV1	Tox-	siCAV 1/-	12203
156	SPD 1	siCAV1	Tox-	siCAV 1/-	4868.27
157	SPD 1	siCAV1	Tox-	siCAV 1/-	2652.8
158	SPD 1	siCAV1	Tox-	siCAV 1/-	2597.5
159	SPD 1	siCAV1	Tox-	siCAV 1/-	15168.6
160	SPD 1	siCAV1	Tox-	siCAV 1/-	6136.48
161	SPD 1	siCAV1	Tox-	siCAV 1/-	3885.81
162	SPD 1	siCAV1	Tox-	siCAV 1/-	7722.03
163	SPD 1	siCAV1	Tox-	siCAV 1/-	18752.3
164	SPD 1	siCAV1	Tox-	siCAV 1/-	13562.2
165	SPD 1	siCAV1	Tox-	siCAV 1/-	11692.8
166	SPD 1	siCAV1	Tox-	siCAV 1/-	10288.9
167	SPD 1	siCAV1	Tox-	siCAV 1/-	5264.63
168	SPD 1	siCAV1	Tox-	siCAV 1/-	2836.83
169	SPD 1	siCAV1	Tox-	siCAV 1/-	23820.7
170	SPD 1	siCAV1	Tox-	siCAV 1/-	6963.31
171	SPD 1	siCAV1	Tox-	siCAV 1/-	8761.18
172	SPD 1	siCAV1	Tox-	siCAV 1/-	4180.7
173	SPD 1	siCAV1	Tox-	siCAV 1/-	12976.8
174	SPD 1	siCAV1	Tox-	siCAV 1/-	33943.9
175	SPD 1	siCAV1	Tox-	siCAV 1/-	7243.93
176	SPD 1	siCAV1	Tox-	siCAV 1/-	23578
177	SPD 1	siCAV1	Tox-	siCAV 1/-	4621.2
178	SPD 1	siCAV1	Tox-	siCAV 1/-	6287.48
179	SPD 1	siCAV1	Tox-	siCAV 1/-	2108.68
180	SPD 1	siCAV1	Tox-	siCAV 1/-	13752
181	SPD 1	siCAV1	Tox-	siCAV 1/-	3532.64
182	SPD 1	siCAV1	Tox-	siCAV 1/-	9522.89
183	SPD 1	siCAV1	Tox-	siCAV 1/-	2346.94
184	SPD 1	siCAV1	Tox-	siCAV 1/-	12514.9
185	SPD 1	siCAV1	Tox-	siCAV 1/-	3728.22
186	SPD 1	siCAV1	Tox-	siCAV 1/-	3882.96
187	SPD 1	siCAV1	Tox-	siCAV 1/-	18644.8
188	SPD 1	siCAV1	Tox-	siCAV 1/-	5004.04
189	SPD 1	siCAV1	Tox-	siCAV 1/-	4581.12
190	SPD 1	siCAV1	Tox-	siCAV 1/-	2467.87
191	SPD 1	siCAV1	Tox-	siCAV 1/-	29617.1
192	SPD 1	siCAV1	Tox-	siCAV 1/-	12051.6
193	SPD 1	siCAV1	Tox-	siCAV 1/-	8247
194	SPD 1	siCAV1	Tox-	siCAV 1/-	3955.13
195	SPD 1	siCAV1	Tox-	siCAV 1/-	4961.56
196	SPD 1	siCAV1	Tox-	siCAV 1/-	21345.5
197	SPD 1	siCAV1	Tox-	siCAV 1/-	4969.04
198	SPD 1	siCAV1	Tox-	siCAV 1/-	11306.4
199	SPD 1	siCAV1	Tox-	siCAV 1/-	6769.32
200	SPD 1	siCAV1	Tox+	siCAV 1 /+	17032
201	SPD 1	siCAV1	Tox+	siCAV 1 /+	15497
202	SPD 1	siCAV1	Tox+	siCAV 1 /+	9802.55
203	SPD 1	siCAV1	Tox+	siCAV 1 /+	6530.81
204	SPD 1	siCAV1	Tox+	siCAV 1 /+	4203.79
205	SPD 1	siCAV1	Tox+	siCAV 1 /+	2622.23
206	SPD 1	siCAV1	Tox+	siCAV 1 /+	3810.92
207	SPD 1	siCAV1	Tox+	siCAV 1 /+	11009.1
208	SPD 1	siCAV1	Tox+	siCAV 1 /+	1804.47
209	SPD 1	siCAV1	Tox+	siCAV 1 /+	2019.58
210	SPD 1	siCAV1	Tox+	siCAV 1 /+	6764.25
211	SPD 1	siCAV1	Tox+	siCAV 1 /+	5267.42
212	SPD 1	siCAV1	Tox+	siCAV 1 /+	6074.33
213	SPD 1	siCAV1	Tox+	siCAV 1 /+	3978.02
214	SPD 1	siCAV1	Tox+	siCAV 1 /+	13373.2
215	SPD 1	siCAV1	Tox+	siCAV 1 /+	8092.26
216	SPD 1	siCAV1	Tox+	siCAV 1 /+	23096.7
217	SPD 1	siCAV1	Tox+	siCAV 1 /+	10886.7
218	SPD 1	siCAV1	Tox+	siCAV 1 /+	32248.4
219	SPD 1	siCAV1	Tox+	siCAV 1 /+	9760.95
220	SPD 1	siCAV1	Tox+	siCAV 1 /+	14823.4
221	SPD 1	siCAV1	Tox+	siCAV 1 /+	10600.5
222	SPD 1	siCAV1	Tox+	siCAV 1 /+	7601.22
223	SPD 1	siCAV1	Tox+	siCAV 1 /+	23768.2
224	SPD 1	siCAV1	Tox+	siCAV 1 /+	44508.3
225	SPD 1	siCAV1	Tox+	siCAV 1 /+	5581.46
226	SPD 1	siCAV1	Tox+	siCAV 1 /+	11283.9
227	SPD 1	siCAV1	Tox+	siCAV 1 /+	16913.7
228	SPD 1	siCAV1	Tox+	siCAV 1 /+	11061.2
229	SPD 1	siCAV1	Tox+	siCAV 1 /+	18916.7
230	SPD 1	siCAV1	Tox+	siCAV 1 /+	2789.46
231	SPD 1	siCAV1	Tox+	siCAV 1 /+	12438
232	SPD 1	siCAV1	Tox+	siCAV 1 /+	4592.02
233	SPD 1	siCAV1	Tox+	siCAV 1 /+	9207.07
234	SPD 1	siCAV1	Tox+	siCAV 1 /+	5942.36
235	SPD 1	siCAV1	Tox+	siCAV 1 /+	7615.56
236	SPD 1	siCAV1	Tox+	siCAV 1 /+	5547.02
237	SPD 1	siCAV1	Tox+	siCAV 1 /+	28605.2
238	SPD 1	siCAV1	Tox+	siCAV 1 /+	6018.27
239	SPD 1	siCAV1	Tox+	siCAV 1 /+	20865.8
240	SPD 1	siCAV1	Tox+	siCAV 1 /+	15719.2
241	SPD 1	siCAV1	Tox+	siCAV 1 /+	7309.13
242	SPD 1	siCAV1	Tox+	siCAV 1 /+	13867.9
243	SPD 1	siCAV1	Tox+	siCAV 1 /+	7851.47
244	SPD 1	siCAV1	Tox+	siCAV 1 /+	5499.71
245	SPD 1	siCAV1	Tox+	siCAV 1 /+	8465.09
246	SPD 1	siCAV1	Tox+	siCAV 1 /+	13956.1
247	SPD 1	siCAV1	Tox+	siCAV 1 /+	4725.52
248	SPD 1	siCAV1	Tox+	siCAV 1 /+	6738.75
249	SPD 1	siCAV1	Tox+	siCAV 1 /+	3249.74
250	SPD 1	siCAV1	Tox+	siCAV 1 /+	19674.5
251	SPD 1	siCAV1	Tox+	siCAV 1 /+	8411.5
252	SPD 1	siCAV1	Tox+	siCAV 1 /+	20118.3
253	SPD 1	siCAV1	Tox+	siCAV 1 /+	3488.82
254	SPD 1	siCAV1	Tox+	siCAV 1 /+	5490.01
255	SPD 1	siCAV1	Tox+	siCAV 1 /+	19759.7
256	SPD 1	siCAV1	Tox+	siCAV 1 /+	8579.37
257	SPD 1	siCAV1	Tox+	siCAV 1 /+	5426.78
258	SPD 1	siCAV1	Tox+	siCAV 1 /+	5437.06
259	SPD 1	siCAV1	Tox+	siCAV 1 /+	14654.7
260	SPD 1	siCAV1	Tox+	siCAV 1 /+	26491.9
261	SPD 1	siCAV1	Tox+	siCAV 1 /+	12608.8
262	SPD 1	siCAV1	Tox+	siCAV 1 /+	11561
263	SPD 1	siCAV1	Tox+	siCAV 1 /+	7445.09
264	SPD 1	siCAV1	Tox+	siCAV 1 /+	25631.7
265	SPD 1	siCAV1	Tox+	siCAV 1 /+	5347.45
266	SPD 1	siCAV1	Tox+	siCAV 1 /+	4311.78
267	SPD 1	siCAV1	Tox+	siCAV 1 /+	2947.49
268	SPD 1	siCAV1	Tox+	siCAV 1 /+	7086.15
269	SPD 1	siCAV1	Tox+	siCAV 1 /+	4370.19
270	SPD 1	siCAV1	Tox+	siCAV 1 /+	12512.6
271	SPD 1	siCAV1	Tox+	siCAV 1 /+	4744.92
272	SPD 1	siCAV1	Tox+	siCAV 1 /+	3697.21
273	SPD 1	siCAV1	Tox+	siCAV 1 /+	11443.8
274	SPD 1	siCAV1	Tox+	siCAV 1 /+	11034.6
275	SPD 1	siCAV1	Tox+	siCAV 1 /+	4582.83
276	SPD 1	siCAV1	Tox+	siCAV 1 /+	8257.34
277	SPD 1	siCAV1	Tox+	siCAV 1 /+	5652.48
278	SPD 1	siCAV1	Tox+	siCAV 1 /+	23186.3
279	SPD 1	siCAV1	Tox+	siCAV 1 /+	4251.28
280	SPD 1	siCAV1	Tox+	siCAV 1 /+	13108.4
281	SPD 1	siCAV1	Tox+	siCAV 1 /+	8639.49
282	SPD 1	siCAV1	Tox+	siCAV 1 /+	18024.1
283	SPD 1	siCAV1	Tox+	siCAV 1 /+	32748.5
284	SPD 1	siCAV1	Tox+	siCAV 1 /+	5646.01
285	SPD 1	siCAV1	Tox+	siCAV 1 /+	3255.19
286	SPD 1	siCAV1	Tox+	siCAV 1 /+	2662.94
287	SPD 1	siCAV1	Tox+	siCAV 1 /+	7068.97
288	SPD 1	siCAV1	Tox+	siCAV 1 /+	6300.8
289	SPD 1	siCAV1	Tox+	siCAV 1 /+	5475.68
290	SPD 1	siCAV1	Tox+	siCAV 1 /+	6379.43
291	SPD 1	siCAV1	Tox+	siCAV 1 /+	36865.9
292	SPD 1	siCAV1	Tox+	siCAV 1 /+	4572.05
293	SPD 1	siCAV1	Tox+	siCAV 1 /+	7107.02
294	SPD 1	siCAV1	Tox+	siCAV 1 /+	35003.1
295	SPD 1	siCAV1	Tox+	siCAV 1 /+	6256.72
296	SPD 1	siCAV1	Tox+	siCAV 1 /+	15169.3
297	SPD 1	siCAV1	Tox+	siCAV 1 /+	15427.5
298	SPD 1	siCAV1	Tox+	siCAV 1 /+	3056.51
299	SPD 1	siCAV1	Tox+	siCAV 1 /+	11096.8
300	SPD 1	siCAV1	Tox+	siCAV 1 /+	8681.22
301	SPD 1	siCAV1	Tox+	siCAV 1 /+	9694.75
302	SPD 1	siCAV1	Tox+	siCAV 1 /+	7361.06
303	SPD 1	siCAV1	Tox+	siCAV 1 /+	16300.6
304	SPD 1	siCAV1	Tox+	siCAV 1 /+	4572.05
305	SPD 1	siCAV1	Tox+	siCAV 1 /+	3837.3
306	SPD 1	siCAV1	Tox+	siCAV 1 /+	29565.9
307	SPD 1	siCAV1	Tox+	siCAV 1 /+	11551
308	SPD 1	siCAV1	Tox+	siCAV 1 /+	11758.9
309	SPD 1	siCAV1	Tox+	siCAV 1 /+	8073.62
310	SPD 1	siCAV1	Tox+	siCAV 1 /+	3743.95
311	SPD 1	siCAV1	Tox+	siCAV 1 /+	9854.81
312	SPD 1	siCAV1	Tox+	siCAV 1 /+	5106.27
313	SPD 1	siCAV1	Tox+	siCAV 1 /+	9512.04
314	SPD 1	siCAV1	Tox+	siCAV 1 /+	9505
315	SPD 1	siCAV1	Tox+	siCAV 1 /+	7554.3
316	SPD 1	siCAV1	Tox+	siCAV 1 /+	4455.11
317	SPD 1	siCAV1	Tox+	siCAV 1 /+	49939
318	SPD 1	siCAV1	Tox+	siCAV 1 /+	8228.74
319	SPD 1	siCAV1	Tox+	siCAV 1 /+	13002.8
320	SPD 1	siCAV1	Tox+	siCAV 1 /+	9453.06
321	SPD 1	siCAV1	Tox+	siCAV 1 /+	3832.54
322	SPD 1	siCAV1	Tox+	siCAV 1 /+	9998.01
323	SPD 1	siCAV1	Tox+	siCAV 1 /+	17625.3
324	SPD 1	siCAV1	Tox+	siCAV 1 /+	5550.38
325	SPD 1	siCAV1	Tox+	siCAV 1 /+	7090.15
326	SPD 1	siCAV1	Tox+	siCAV 1 /+	6325.97
327	SPD 1	siCAV1	Tox+	siCAV 1 /+	17881.8
328	SPD 1	siCAV1	Tox+	siCAV 1 /+	9359.46
329	SPD 1	siCAV1	Tox+	siCAV 1 /+	3332.06
330	SPD 1	siCAV1	Tox+	siCAV 1 /+	5511.7
331	SPD 1	siCAV1	Tox+	siCAV 1 /+	54572.9
332	SPD 1	siCAV1	Tox+	siCAV 1 /+	21178.2
333	SPD 1	siCAV1	Tox+	siCAV 1 /+	16766.4
334	SPD 1	siCAV1	Tox+	siCAV 1 /+	7118.56
335	SPD 1	siCAV1	Tox+	siCAV 1 /+	10089.1
336	SPD 1	siCAV1	Tox+	siCAV 1 /+	9652.76
337	SPD 1	siCAV1	Tox+	siCAV 1 /+	11419.9
338	SPD 1	siCAV1	Tox+	siCAV 1 /+	2488.48
339	SPD 1	siCAV1	Tox+	siCAV 1 /+	3852.52
340	SPD 1	siCAV1	Tox+	siCAV 1 /+	7628.43
341	SPD 1	siCAV1	Tox+	siCAV 1 /+	26424.7
342	SPD 1	siCAV1	Tox+	siCAV 1 /+	6024.8
343	SPD 1	siCAV1	Tox+	siCAV 1 /+	11231.4
344	SPD 1	siCAV1	Tox+	siCAV 1 /+	24005.3
345	SPD 1	siCAV1	Tox+	siCAV 1 /+	11108.9
346	SPD 1	siCAV1	Tox+	siCAV 1 /+	13063
347	SPD 1	siCAV1	Tox+	siCAV 1 /+	10356.1
348	SPD 1	siCAV1	Tox+	siCAV 1 /+	11373.6
349	SPD 1	siCAV1	Tox+	siCAV 1 /+	4936.82
350	SPD 1	siCAV1	Tox+	siCAV 1 /+	18546
351	SPD 1	siCAV1	Tox+	siCAV 1 /+	11477
352	SPD 1	siCAV1	Tox+	siCAV 1 /+	8177.43
353	SPD 1	siCAV1	Tox+	siCAV 1 /+	9549.77
354	SPD 1	siCAV1	Tox+	siCAV 1 /+	15311.5
355	SPD 1	siCAV1	Tox+	siCAV 1 /+	3845.04
356	SPD 1	siCAV1	Tox+	siCAV 1 /+	12901.1
357	SPD 1	siCAV1	Tox+	siCAV 1 /+	9868.89
358	SPD 1	siCAV1	Tox+	siCAV 1 /+	6871.1
359	SPD 1	siCAV1	Tox+	siCAV 1 /+	6575.2
360	SPD 1	siCAV1	Tox+	siCAV 1 /+	4024.51
361	SPD 1	siCAV1	Tox+	siCAV 1 /+	16633.5
362	SPD 1	siCavin1	Tox-	siCavin 1/-	18659
363	SPD 1	siCavin1	Tox-	siCavin 1/-	9069.71
364	SPD 1	siCavin1	Tox-	siCavin 1/-	2933.48
365	SPD 1	siCavin1	Tox-	siCavin 1/-	6879.48
366	SPD 1	siCavin1	Tox-	siCavin 1/-	29229.5
367	SPD 1	siCavin1	Tox-	siCavin 1/-	7294.67
368	SPD 1	siCavin1	Tox-	siCavin 1/-	6802.49
369	SPD 1	siCavin1	Tox-	siCavin 1/-	6874.21
370	SPD 1	siCavin1	Tox-	siCavin 1/-	30264.6
371	SPD 1	siCavin1	Tox-	siCavin 1/-	6302.76
372	SPD 1	siCavin1	Tox-	siCavin 1/-	10982.2
373	SPD 1	siCavin1	Tox-	siCavin 1/-	2552.28
374	SPD 1	siCavin1	Tox-	siCavin 1/-	6966.8
375	SPD 1	siCavin1	Tox-	siCavin 1/-	7526.84
376	SPD 1	siCavin1	Tox-	siCavin 1/-	7866.75
377	SPD 1	siCavin1	Tox-	siCavin 1/-	16415.7
378	SPD 1	siCavin1	Tox-	siCavin 1/-	6108.64
379	SPD 1	siCavin1	Tox-	siCavin 1/-	2250.42
380	SPD 1	siCavin1	Tox-	siCavin 1/-	6108.64
381	SPD 1	siCavin1	Tox-	siCavin 1/-	10820.5
382	SPD 1	siCavin1	Tox-	siCavin 1/-	11259.3
383	SPD 1	siCavin1	Tox-	siCavin 1/-	15692
384	SPD 1	siCavin1	Tox-	siCavin 1/-	22712.1
385	SPD 1	siCavin1	Tox-	siCavin 1/-	5898.92
386	SPD 1	siCavin1	Tox-	siCavin 1/-	3636.14
387	SPD 1	siCavin1	Tox-	siCavin 1/-	5085.73
388	SPD 1	siCavin1	Tox-	siCavin 1/-	5926.32
389	SPD 1	siCavin1	Tox-	siCavin 1/-	7760.27
390	SPD 1	siCavin1	Tox-	siCavin 1/-	8122.77
391	SPD 1	siCavin1	Tox-	siCavin 1/-	4127.94
392	SPD 1	siCavin1	Tox-	siCavin 1/-	9743.96
393	SPD 1	siCavin1	Tox-	siCavin 1/-	3545.52
394	SPD 1	siCavin1	Tox-	siCavin 1/-	5290.31
395	SPD 1	siCavin1	Tox-	siCavin 1/-	5253.72
396	SPD 1	siCavin1	Tox-	siCavin 1/-	7923.76
397	SPD 1	siCavin1	Tox-	siCavin 1/-	2780.29
398	SPD 1	siCavin1	Tox-	siCavin 1/-	5615.64
399	SPD 1	siCavin1	Tox-	siCavin 1/-	2520.13
400	SPD 1	siCavin1	Tox-	siCavin 1/-	2265.57
401	SPD 1	siCavin1	Tox-	siCavin 1/-	3185.18
402	SPD 1	siCavin1	Tox-	siCavin 1/-	7956.49
403	SPD 1	siCavin1	Tox-	siCavin 1/-	6315.83
404	SPD 1	siCavin1	Tox-	siCavin 1/-	2026.62
405	SPD 1	siCavin1	Tox-	siCavin 1/-	3768.81
406	SPD 1	siCavin1	Tox-	siCavin 1/-	3028.73
407	SPD 1	siCavin1	Tox-	siCavin 1/-	7072.77
408	SPD 1	siCavin1	Tox-	siCavin 1/-	19970.6
409	SPD 1	siCavin1	Tox-	siCavin 1/-	4439.76
410	SPD 1	siCavin1	Tox-	siCavin 1/-	3358.44
411	SPD 1	siCavin1	Tox-	siCavin 1/-	7712.46
412	SPD 1	siCavin1	Tox-	siCavin 1/-	7330.88
413	SPD 1	siCavin1	Tox-	siCavin 1/-	4841.32
414	SPD 1	siCavin1	Tox-	siCavin 1/-	1753.73
415	SPD 1	siCavin1	Tox-	siCavin 1/-	20871.6
416	SPD 1	siCavin1	Tox-	siCavin 1/-	7151.91
417	SPD 1	siCavin1	Tox-	siCavin 1/-	6904.78
418	SPD 1	siCavin1	Tox-	siCavin 1/-	2290.43
419	SPD 1	siCavin1	Tox-	siCavin 1/-	7948.56
420	SPD 1	siCavin1	Tox-	siCavin 1/-	47649.8
421	SPD 1	siCavin1	Tox-	siCavin 1/-	4551.25
422	SPD 1	siCavin1	Tox-	siCavin 1/-	13889.1
423	SPD 1	siCavin1	Tox-	siCavin 1/-	32289.5
424	SPD 1	siCavin1	Tox-	siCavin 1/-	4208.48
425	SPD 1	siCavin1	Tox-	siCavin 1/-	4421.69
426	SPD 1	siCavin1	Tox-	siCavin 1/-	1831.04
427	SPD 1	siCavin1	Tox-	siCavin 1/-	3868.18
428	SPD 1	siCavin1	Tox-	siCavin 1/-	9414.51
429	SPD 1	siCavin1	Tox-	siCavin 1/-	3041.1
430	SPD 1	siCavin1	Tox-	siCavin 1/-	5145.46
431	SPD 1	siCavin1	Tox-	siCavin 1/-	7151.66
432	SPD 1	siCavin1	Tox-	siCavin 1/-	7083.74
433	SPD 1	siCavin1	Tox-	siCavin 1/-	8172.55
434	SPD 1	siCavin1	Tox-	siCavin 1/-	7010.37
435	SPD 1	siCavin1	Tox-	siCavin 1/-	9640.71
436	SPD 1	siCavin1	Tox-	siCavin 1/-	7377.17
437	SPD 1	siCavin1	Tox-	siCavin 1/-	3349.75
438	SPD 1	siCavin1	Tox-	siCavin 1/-	2584.88
439	SPD 1	siCavin1	Tox-	siCavin 1/-	1799.33
440	SPD 1	siCavin1	Tox-	siCavin 1/-	4673.9
441	SPD 1	siCavin1	Tox-	siCavin 1/-	9512.3
442	SPD 1	siCavin1	Tox-	siCavin 1/-	6312.46
443	SPD 1	siCavin1	Tox-	siCavin 1/-	7380.53
444	SPD 1	siCavin1	Tox-	siCavin 1/-	5007.85
445	SPD 1	siCavin1	Tox-	siCavin 1/-	3834.95
446	SPD 1	siCavin1	Tox-	siCavin 1/-	6762.09
447	SPD 1	siCavin1	Tox-	siCavin 1/-	5481.45
448	SPD 1	siCavin1	Tox-	siCavin 1/-	4667.05
449	SPD 1	siCavin1	Tox-	siCavin 1/-	27000.9
450	SPD 1	siCavin1	Tox-	siCavin 1/-	18305.7
451	SPD 1	siCavin1	Tox-	siCavin 1/-	10320
452	SPD 1	siCavin1	Tox-	siCavin 1/-	3985.69
453	SPD 1	siCavin1	Tox-	siCavin 1/-	2757.12
454	SPD 1	siCavin1	Tox-	siCavin 1/-	8157.14
455	SPD 1	siCavin1	Tox-	siCavin 1/-	10297
456	SPD 1	siCavin1	Tox-	siCavin 1/-	9245.75
457	SPD 1	siCavin1	Tox-	siCavin 1/-	4935.68
458	SPD 1	siCavin1	Tox-	siCavin 1/-	9512.23
459	SPD 1	siCavin1	Tox-	siCavin 1/-	13118.7
460	SPD 1	siCavin1	Tox-	siCavin 1/-	26430.7
461	SPD 1	siCavin1	Tox-	siCavin 1/-	10649.7
462	SPD 1	siCavin1	Tox-	siCavin 1/-	4365.25
463	SPD 1	siCavin1	Tox-	siCavin 1/-	5605.55
464	SPD 1	siCavin1	Tox-	siCavin 1/-	4546.17
465	SPD 1	siCavin1	Tox-	siCavin 1/-	4346.79
466	SPD 1	siCavin1	Tox-	siCavin 1/-	2361.78
467	SPD 1	siCavin1	Tox-	siCavin 1/-	2809.56
468	SPD 1	siCavin1	Tox-	siCavin 1/-	4707.63
469	SPD 1	siCavin1	Tox-	siCavin 1/-	3264.64
470	SPD 1	siCavin1	Tox-	siCavin 1/-	4118.17
471	SPD 1	siCavin1	Tox-	siCavin 1/-	9825.32
472	SPD 1	siCavin1	Tox-	siCavin 1/-	5801.39
473	SPD 1	siCavin1	Tox-	siCavin 1/-	13486.5
474	SPD 1	siCavin1	Tox-	siCavin 1/-	17168.5
475	SPD 1	siCavin1	Tox-	siCavin 1/-	11055.5
476	SPD 1	siCavin1	Tox-	siCavin 1/-	6270.16
477	SPD 1	siCavin1	Tox-	siCavin 1/-	27307.8
478	SPD 1	siCavin1	Tox-	siCavin 1/-	6759.43
479	SPD 1	siCavin1	Tox-	siCavin 1/-	20030.6
480	SPD 1	siCavin1	Tox-	siCavin 1/-	7708.65
481	SPD 1	siCavin1	Tox-	siCavin 1/-	4926.87
482	SPD 1	siCavin1	Tox-	siCavin 1/-	25032.3
483	SPD 1	siCavin1	Tox-	siCavin 1/-	5990.05
484	SPD 1	siCavin1	Tox-	siCavin 1/-	5059.28
485	SPD 1	siCavin1	Tox-	siCavin 1/-	10990.9
486	SPD 1	siCavin1	Tox-	siCavin 1/-	8400.02
487	SPD 1	siCavin1	Tox-	siCavin 1/-	4136.12
488	SPD 1	siCavin1	Tox-	siCavin 1/-	4864.02
489	SPD 1	siCavin1	Tox-	siCavin 1/-	12866.6
490	SPD 1	siCavin1	Tox-	siCavin 1/-	6748.46
491	SPD 1	siCavin1	Tox-	siCavin 1/-	9195.59
492	SPD 1	siCavin1	Tox-	siCavin 1/-	8338.57
493	SPD 1	siCavin1	Tox-	siCavin 1/-	9208.84
494	SPD 1	siCavin1	Tox-	siCavin 1/-	17193.7
495	SPD 1	siCavin1	Tox-	siCavin 1/-	9401.13
496	SPD 1	siCavin1	Tox-	siCavin 1/-	4641.68
497	SPD 1	siCavin1	Tox-	siCavin 1/-	6926.97
498	SPD 1	siCavin1	Tox-	siCavin 1/-	20260.3
499	SPD 1	siCavin1	Tox-	siCavin 1/-	10923.1
500	SPD 1	siCavin1	Tox-	siCavin 1/-	26113.7
501	SPD 1	siCavin1	Tox-	siCavin 1/-	8589.64
502	SPD 1	siCavin1	Tox-	siCavin 1/-	7012.59
503	SPD 1	siCavin1	Tox-	siCavin 1/-	8920.68
504	SPD 1	siCavin1	Tox-	siCavin 1/-	22507
505	SPD 1	siCavin1	Tox-	siCavin 1/-	2618.55
506	SPD 1	siCavin1	Tox-	siCavin 1/-	8038.55
507	SPD 1	siCavin1	Tox-	siCavin 1/-	8996.14
508	SPD 1	siCavin1	Tox-	siCavin 1/-	16668.3
509	SPD 1	siCavin1	Tox-	siCavin 1/-	6331.62
510	SPD 1	siCavin1	Tox-	siCavin 1/-	9291.29
511	SPD 1	siCavin1	Tox-	siCavin 1/-	7933.47
512	SPD 1	siCavin1	Tox-	siCavin 1/-	19704.8
513	SPD 1	siCavin1	Tox-	siCavin 1/-	2748.43
514	SPD 1	siCavin1	Tox-	siCavin 1/-	5411.25
515	SPD 1	siCavin1	Tox-	siCavin 1/-	13850
516	SPD 1	siCavin1	Tox-	siCavin 1/-	11270
517	SPD 1	siCavin1	Tox-	siCavin 1/-	5906.72
518	SPD 1	siCavin1	Tox-	siCavin 1/-	3369.54
519	SPD 1	siCavin1	Tox-	siCavin 1/-	16946.5
520	SPD 1	siCavin1	Tox-	siCavin 1/-	9064.76
521	SPD 1	siCavin1	Tox-	siCavin 1/-	11953.4
522	SPD 1	siCavin1	Tox-	siCavin 1/-	33957.1
523	SPD 1	siCavin1	Tox-	siCavin 1/-	6401.82
524	SPD 1	siCavin1	Tox-	siCavin 1/-	6257.48
525	SPD 1	siCavin1	Tox-	siCavin 1/-	1703.06
526	SPD 1	siCavin1	Tox-	siCavin 1/-	6653.65
527	SPD 1	siCavin1	Tox-	siCavin 1/-	3623.77
528	SPD 1	siCavin1	Tox-	siCavin 1/-	7323.2
529	SPD 1	siCavin1	Tox-	siCavin 1/-	4729.45
530	SPD 1	siCavin1	Tox-	siCavin 1/-	4873.91
531	SPD 1	siCavin1	Tox-	siCavin 1/-	9946.13
532	SPD 1	siCavin1	Tox-	siCavin 1/-	8363.88
533	SPD 1	siCavin1	Tox-	siCavin 1/-	5199.05
534	SPD 1	siCavin1	Tox-	siCavin 1/-	2162.52
535	SPD 1	siCavin1	Tox-	siCavin 1/-	3967.3
536	SPD 1	siCavin1	Tox-	siCavin 1/-	4930.42
537	SPD 1	siCavin1	Tox-	siCavin 1/-	6045.35
538	SPD 1	siCavin1	Tox-	siCavin 1/-	10048.7
539	SPD 1	siCavin1	Tox-	siCavin 1/-	7645.24
540	SPD 1	siCavin1	Tox-	siCavin 1/-	6545.01
541	SPD 1	siCavin1	Tox-	siCavin 1/-	3147.45
542	SPD 1	siCavin1	Tox-	siCavin 1/-	4899.66
543	SPD 1	siCavin1	Tox-	siCavin 1/-	4870.81
544	SPD 1	siCavin1	Tox-	siCavin 1/-	5776.15
545	SPD 1	siCavin1	Tox-	siCavin 1/-	12828
546	SPD 1	siCavin1	Tox-	siCavin 1/-	9444.76
547	SPD 1	siCavin1	Tox-	siCavin 1/-	13968.4
548	SPD 1	siCavin1	Tox-	siCavin 1/-	7480.22
549	SPD 1	siCavin1	Tox-	siCavin 1/-	6969.4
550	SPD 1	siCavin1	Tox-	siCavin 1/-	2291.7
551	SPD 1	siCavin1	Tox-	siCavin 1/-	3234.39
552	SPD 1	siCavin1	Tox-	siCavin 1/-	9535.06
553	SPD 1	siCavin1	Tox-	siCavin 1/-	8109.07
554	SPD 1	siCavin1	Tox-	siCavin 1/-	5962.85
555	SPD 1	siCavin1	Tox-	siCavin 1/-	8457.67
556	SPD 1	siCavin1	Tox-	siCavin 1/-	5745.14
557	SPD 1	siCavin1	Tox-	siCavin 1/-	15250.8
558	SPD 1	siCavin1	Tox-	siCavin 1/-	8977.25
559	SPD 1	siCavin1	Tox-	siCavin 1/-	8362.93
560	SPD 1	siCavin1	Tox-	siCavin 1/-	11335.2
561	SPD 1	siCavin1	Tox+	siCavin 1/+	27235.4
562	SPD 1	siCavin1	Tox+	siCavin 1/+	14538.4
563	SPD 1	siCavin1	Tox+	siCavin 1/+	17403
564	SPD 1	siCavin1	Tox+	siCavin 1/+	8570.49
565	SPD 1	siCavin1	Tox+	siCavin 1/+	5958.73
566	SPD 1	siCavin1	Tox+	siCavin 1/+	6847.07
567	SPD 1	siCavin1	Tox+	siCavin 1/+	7030.41
568	SPD 1	siCavin1	Tox+	siCavin 1/+	6565.05
569	SPD 1	siCavin1	Tox+	siCavin 1/+	50366.8
570	SPD 1	siCavin1	Tox+	siCavin 1/+	6047.19
571	SPD 1	siCavin1	Tox+	siCavin 1/+	7739.28
572	SPD 1	siCavin1	Tox+	siCavin 1/+	13029.4
573	SPD 1	siCavin1	Tox+	siCavin 1/+	20892.9
574	SPD 1	siCavin1	Tox+	siCavin 1/+	2232.09
575	SPD 1	siCavin1	Tox+	siCavin 1/+	24381.4
576	SPD 1	siCavin1	Tox+	siCavin 1/+	8551.91
577	SPD 1	siCavin1	Tox+	siCavin 1/+	6380.89
578	SPD 1	siCavin1	Tox+	siCavin 1/+	4438.75
579	SPD 1	siCavin1	Tox+	siCavin 1/+	16486.2
580	SPD 1	siCavin1	Tox+	siCavin 1/+	31398.8
581	SPD 1	siCavin1	Tox+	siCavin 1/+	4997.96
582	SPD 1	siCavin1	Tox+	siCavin 1/+	7100.67
583	SPD 1	siCavin1	Tox+	siCavin 1/+	25097.2
584	SPD 1	siCavin1	Tox+	siCavin 1/+	2911.22
585	SPD 1	siCavin1	Tox+	siCavin 1/+	44287.8
586	SPD 1	siCavin1	Tox+	siCavin 1/+	5977.75
587	SPD 1	siCavin1	Tox+	siCavin 1/+	9749.54
588	SPD 1	siCavin1	Tox+	siCavin 1/+	8941.35
589	SPD 1	siCavin1	Tox+	siCavin 1/+	9667.35
590	SPD 1	siCavin1	Tox+	siCavin 1/+	31762.4
591	SPD 1	siCavin1	Tox+	siCavin 1/+	6061.21
592	SPD 1	siCavin1	Tox+	siCavin 1/+	29164
593	SPD 1	siCavin1	Tox+	siCavin 1/+	6688.78
594	SPD 1	siCavin1	Tox+	siCavin 1/+	21113
595	SPD 1	siCavin1	Tox+	siCavin 1/+	7761.1
596	SPD 1	siCavin1	Tox+	siCavin 1/+	4933.91
597	SPD 1	siCavin1	Tox+	siCavin 1/+	24928.3
598	SPD 1	siCavin1	Tox+	siCavin 1/+	6969.02
599	SPD 1	siCavin1	Tox+	siCavin 1/+	9552.18
600	SPD 1	siCavin1	Tox+	siCavin 1/+	22799.1
601	SPD 1	siCavin1	Tox+	siCavin 1/+	6835.59
602	SPD 1	siCavin1	Tox+	siCavin 1/+	6430.23
603	SPD 1	siCavin1	Tox+	siCavin 1/+	9867.75
604	SPD 1	siCavin1	Tox+	siCavin 1/+	22357.2
605	SPD 1	siCavin1	Tox+	siCavin 1/+	3419.38
606	SPD 1	siCavin1	Tox+	siCavin 1/+	8062.84
607	SPD 1	siCavin1	Tox+	siCavin 1/+	4102.06
608	SPD 1	siCavin1	Tox+	siCavin 1/+	26293.4
609	SPD 1	siCavin1	Tox+	siCavin 1/+	11574.2
610	SPD 1	siCavin1	Tox+	siCavin 1/+	8422.16
611	SPD 1	siCavin1	Tox+	siCavin 1/+	17534.4
612	SPD 1	siCavin1	Tox+	siCavin 1/+	14259.3
613	SPD 1	siCavin1	Tox+	siCavin 1/+	8272.05
614	SPD 1	siCavin1	Tox+	siCavin 1/+	5472.82
615	SPD 1	siCavin1	Tox+	siCavin 1/+	4741.88
616	SPD 1	siCavin1	Tox+	siCavin 1/+	12773.9
617	SPD 1	siCavin1	Tox+	siCavin 1/+	9041.68
618	SPD 1	siCavin1	Tox+	siCavin 1/+	18957.9
619	SPD 1	siCavin1	Tox+	siCavin 1/+	27528.9
620	SPD 1	siCavin1	Tox+	siCavin 1/+	21740.2
621	SPD 1	siCavin1	Tox+	siCavin 1/+	7501.53
622	SPD 1	siCavin1	Tox+	siCavin 1/+	15275.9
623	SPD 1	siCavin1	Tox+	siCavin 1/+	5094.92
624	SPD 1	siCavin1	Tox+	siCavin 1/+	2595.59
625	SPD 1	siCavin1	Tox+	siCavin 1/+	4915.96
626	SPD 1	siCavin1	Tox+	siCavin 1/+	4103.08
627	SPD 1	siCavin1	Tox+	siCavin 1/+	19712.5
628	SPD 1	siCavin1	Tox+	siCavin 1/+	4246.02
629	SPD 1	siCavin1	Tox+	siCavin 1/+	9873.71
630	SPD 1	siCavin1	Tox+	siCavin 1/+	8320.88
631	SPD 1	siCavin1	Tox+	siCavin 1/+	7469.38
632	SPD 1	siCavin1	Tox+	siCavin 1/+	4523.15
633	SPD 1	siCavin1	Tox+	siCavin 1/+	2156.81
634	SPD 1	siCavin1	Tox+	siCavin 1/+	18036.9
635	SPD 1	siCavin1	Tox+	siCavin 1/+	4863.7
636	SPD 1	siCavin1	Tox+	siCavin 1/+	10153.1
637	SPD 1	siCavin1	Tox+	siCavin 1/+	10183.6
638	SPD 1	siCavin1	Tox+	siCavin 1/+	15669.1
639	SPD 1	siCavin1	Tox+	siCavin 1/+	8612.34
640	SPD 1	siCavin1	Tox+	siCavin 1/+	5937.23
641	SPD 1	siCavin1	Tox+	siCavin 1/+	4148.55
642	SPD 1	siCavin1	Tox+	siCavin 1/+	5210.91
643	SPD 1	siCavin1	Tox+	siCavin 1/+	14574.7
644	SPD 1	siCavin1	Tox+	siCavin 1/+	23960.7
645	SPD 1	siCavin1	Tox+	siCavin 1/+	5690.28
646	SPD 1	siCavin1	Tox+	siCavin 1/+	5582.98
647	SPD 1	siCavin1	Tox+	siCavin 1/+	14307.8
648	SPD 1	siCavin1	Tox+	siCavin 1/+	4931.81
649	SPD 1	siCavin1	Tox+	siCavin 1/+	7966.76
650	SPD 1	siCavin1	Tox+	siCavin 1/+	5726.62
651	SPD 1	siCavin1	Tox+	siCavin 1/+	44792.3
652	SPD 1	siCavin1	Tox+	siCavin 1/+	2287.13
653	SPD 1	siCavin1	Tox+	siCavin 1/+	4526.13
654	SPD 1	siCavin1	Tox+	siCavin 1/+	7538.19
655	SPD 1	siCavin1	Tox+	siCavin 1/+	9361.87
656	SPD 1	siCavin1	Tox+	siCavin 1/+	6897.11
657	SPD 1	siCavin1	Tox+	siCavin 1/+	2598.51
658	SPD 1	siCavin1	Tox+	siCavin 1/+	22545.4
659	SPD 1	siCavin1	Tox+	siCavin 1/+	9597.97
660	SPD 1	siCavin1	Tox+	siCavin 1/+	7521.76
661	SPD 1	siCavin1	Tox+	siCavin 1/+	16029.5
662	SPD 1	siCavin1	Tox+	siCavin 1/+	10223.2
663	SPD 1	siCavin1	Tox+	siCavin 1/+	8200.39
664	SPD 1	siCavin1	Tox+	siCavin 1/+	12981.7
665	SPD 1	siCavin1	Tox+	siCavin 1/+	7595.64
666	SPD 1	siCavin1	Tox+	siCavin 1/+	9934.08
667	SPD 1	siCavin1	Tox+	siCavin 1/+	6682.31
668	SPD 1	siCavin1	Tox+	siCavin 1/+	26715.5
669	SPD 1	siCavin1	Tox+	siCavin 1/+	6038.82
670	SPD 1	siCavin1	Tox+	siCavin 1/+	6257.04
671	SPD 1	siCavin1	Tox+	siCavin 1/+	7296.25
672	SPD 1	siCavin1	Tox+	siCavin 1/+	23554.1
673	SPD 1	siCavin1	Tox+	siCavin 1/+	6223.74
674	SPD 1	siCavin1	Tox+	siCavin 1/+	1993.32
675	SPD 1	siCavin1	Tox+	siCavin 1/+	3361.61
676	SPD 1	siCavin1	Tox+	siCavin 1/+	23107.6
677	SPD 1	siCavin1	Tox+	siCavin 1/+	4815.82
678	SPD 1	siCavin1	Tox+	siCavin 1/+	23834.6
679	SPD 1	siCavin1	Tox+	siCavin 1/+	7890.09
680	SPD 1	siCavin1	Tox+	siCavin 1/+	8244.4
681	SPD 1	siCavin1	Tox+	siCavin 1/+	16759.8
682	SPD 1	siCavin1	Tox+	siCavin 1/+	9954.25
683	SPD 1	siCavin1	Tox+	siCavin 1/+	5528.82
684	SPD 1	siCavin1	Tox+	siCavin 1/+	19597.4
685	SPD 1	siCavin1	Tox+	siCavin 1/+	9912.46
686	SPD 1	siCavin1	Tox+	siCavin 1/+	8455.51
687	SPD 1	siCavin1	Tox+	siCavin 1/+	5045.2
688	SPD 1	siCavin1	Tox+	siCavin 1/+	15380
689	SPD 1	siCavin1	Tox+	siCavin 1/+	5055.1
690	SPD 1	siCavin1	Tox+	siCavin 1/+	27196.1
691	SPD 1	siCavin1	Tox+	siCavin 1/+	6023.22
692	SPD 1	siCavin1	Tox+	siCavin 1/+	4120.71
693	SPD 1	siCavin1	Tox+	siCavin 1/+	25263.1
694	SPD 1	siCavin1	Tox+	siCavin 1/+	15385.1
695	SPD 1	siCavin1	Tox+	siCavin 1/+	14754.4
696	SPD 1	siCavin1	Tox+	siCavin 1/+	15061.4
697	SPD 1	siCavin1	Tox+	siCavin 1/+	6563.09
698	SPD 1	siCavin1	Tox+	siCavin 1/+	19132
699	SPD 1	siCavin1	Tox+	siCavin 1/+	7104.92
700	SPD 1	siCavin1	Tox+	siCavin 1/+	4963.14
701	SPD 1	siCavin1	Tox+	siCavin 1/+	38570.2
702	SPD 1	siCavin1	Tox+	siCavin 1/+	8242.62
703	SPD 1	siCavin1	Tox+	siCavin 1/+	4197.89
704	SPD 1	siCavin1	Tox+	siCavin 1/+	7585.62
705	SPD 1	siCavin1	Tox+	siCavin 1/+	7318
706	SPD 1	siCavin1	Tox+	siCavin 1/+	10651.3
707	SPD 1	siCavin1	Tox+	siCavin 1/+	2910.9
708	SPD 1	siCTRL	Tox-	siCT/ -	34291.7
709	SPD 1	siCTRL	Tox-	siCT/ -	4881.9
710	SPD 1	siCTRL	Tox-	siCT/ -	6889.18
711	SPD 1	siCTRL	Tox-	siCT/ -	3743.44
712	SPD 1	siCTRL	Tox-	siCT/ -	3936.23
713	SPD 1	siCTRL	Tox-	siCT/ -	21418.7
714	SPD 1	siCTRL	Tox-	siCT/ -	3142.06
715	SPD 1	siCTRL	Tox-	siCT/ -	19115.9
716	SPD 1	siCTRL	Tox-	siCT/ -	3037.1
717	SPD 1	siCTRL	Tox-	siCT/ -	6127.1
718	SPD 1	siCTRL	Tox-	siCT/ -	5794.6
719	SPD 1	siCTRL	Tox-	siCT/ -	12534.6
720	SPD 1	siCTRL	Tox-	siCT/ -	2775.63
721	SPD 1	siCTRL	Tox-	siCT/ -	3279.23
722	SPD 1	siCTRL	Tox-	siCT/ -	4087.23
723	SPD 1	siCTRL	Tox-	siCT/ -	4268.79
724	SPD 1	siCTRL	Tox-	siCT/ -	4867.89
725	SPD 1	siCTRL	Tox-	siCT/ -	4123.06
726	SPD 1	siCTRL	Tox-	siCT/ -	2203.87
727	SPD 1	siCTRL	Tox-	siCT/ -	1693.61
728	SPD 1	siCTRL	Tox-	siCT/ -	5829.48
729	SPD 1	siCTRL	Tox-	siCT/ -	4049.87
730	SPD 1	siCTRL	Tox-	siCT/ -	25668.2
731	SPD 1	siCTRL	Tox-	siCT/ -	7899.22
732	SPD 1	siCTRL	Tox-	siCT/ -	15008.7
733	SPD 1	siCTRL	Tox-	siCT/ -	6378.42
734	SPD 1	siCTRL	Tox-	siCT/ -	3444.87
735	SPD 1	siCTRL	Tox-	siCT/ -	3574.94
736	SPD 1	siCTRL	Tox-	siCT/ -	3494.34
737	SPD 1	siCTRL	Tox-	siCT/ -	9419.33
738	SPD 1	siCTRL	Tox-	siCT/ -	8029.1
739	SPD 1	siCTRL	Tox-	siCT/ -	6602.6
740	SPD 1	siCTRL	Tox-	siCT/ -	2732.45
741	SPD 1	siCTRL	Tox-	siCT/ -	3442.4
742	SPD 1	siCTRL	Tox-	siCT/ -	8477.08
743	SPD 1	siCTRL	Tox-	siCT/ -	5861.57
744	SPD 1	siCTRL	Tox-	siCT/ -	3753.21
745	SPD 1	siCTRL	Tox-	siCT/ -	6439.11
746	SPD 1	siCTRL	Tox-	siCT/ -	9019.61
747	SPD 1	siCTRL	Tox-	siCT/ -	5829.1
748	SPD 1	siCTRL	Tox-	siCT/ -	3176.81
749	SPD 1	siCTRL	Tox-	siCT/ -	7789.13
750	SPD 1	siCTRL	Tox-	siCT/ -	3654.85
751	SPD 1	siCTRL	Tox-	siCT/ -	2882.05
752	SPD 1	siCTRL	Tox-	siCT/ -	1979.62
753	SPD 1	siCTRL	Tox-	siCT/ -	3118.53
754	SPD 1	siCTRL	Tox-	siCT/ -	10185.1
755	SPD 1	siCTRL	Tox-	siCT/ -	5583.55
756	SPD 1	siCTRL	Tox-	siCT/ -	6832.74
757	SPD 1	siCTRL	Tox-	siCT/ -	9060.89
758	SPD 1	siCTRL	Tox-	siCT/ -	15136
759	SPD 1	siCTRL	Tox-	siCT/ -	15715
760	SPD 1	siCTRL	Tox-	siCT/ -	4427.14
761	SPD 1	siCTRL	Tox-	siCT/ -	6840.16
762	SPD 1	siCTRL	Tox-	siCT/ -	2805.69
763	SPD 1	siCTRL	Tox-	siCT/ -	6940.48
764	SPD 1	siCTRL	Tox-	siCT/ -	4411.73
765	SPD 1	siCTRL	Tox-	siCT/ -	6588.45
766	SPD 1	siCTRL	Tox-	siCT/ -	2356.39
767	SPD 1	siCTRL	Tox-	siCT/ -	3490.47
768	SPD 1	siCTRL	Tox-	siCT/ -	3146.37
769	SPD 1	siCTRL	Tox-	siCT/ -	7951.67
770	SPD 1	siCTRL	Tox-	siCT/ -	4870.3
771	SPD 1	siCTRL	Tox-	siCT/ -	9782.13
772	SPD 1	siCTRL	Tox-	siCT/ -	11440.6
773	SPD 1	siCTRL	Tox-	siCT/ -	9159
774	SPD 1	siCTRL	Tox-	siCT/ -	3147.64
775	SPD 1	siCTRL	Tox-	siCT/ -	10826.8
776	SPD 1	siCTRL	Tox-	siCT/ -	3691.57
777	SPD 1	siCTRL	Tox-	siCT/ -	3485.14
778	SPD 1	siCTRL	Tox-	siCT/ -	3585.72
779	SPD 1	siCTRL	Tox-	siCT/ -	12740.8
780	SPD 1	siCTRL	Tox-	siCT/ -	6489.97
781	SPD 1	siCTRL	Tox-	siCT/ -	7433.49
782	SPD 1	siCTRL	Tox-	siCT/ -	2622.1
783	SPD 1	siCTRL	Tox-	siCT/ -	2219.85
784	SPD 1	siCTRL	Tox-	siCT/ -	8611.46
785	SPD 1	siCTRL	Tox-	siCT/ -	3858.48
786	SPD 1	siCTRL	Tox-	siCT/ -	9779.72
787	SPD 1	siCTRL	Tox-	siCT/ -	9331.62
788	SPD 1	siCTRL	Tox-	siCT/ -	9983.93
789	SPD 1	siCTRL	Tox-	siCT/ -	10604.8
790	SPD 1	siCTRL	Tox-	siCT/ -	27541.9
791	SPD 1	siCTRL	Tox-	siCT/ -	4468.36
792	SPD 1	siCTRL	Tox-	siCT/ -	4082.47
793	SPD 1	siCTRL	Tox-	siCT/ -	4650.11
794	SPD 1	siCTRL	Tox-	siCT/ -	9949.81
795	SPD 1	siCTRL	Tox-	siCT/ -	6081.12
796	SPD 1	siCTRL	Tox-	siCT/ -	1750.63
797	SPD 1	siCTRL	Tox-	siCT/ -	8372.5
798	SPD 1	siCTRL	Tox-	siCT/ -	8319.04
799	SPD 1	siCTRL	Tox-	siCT/ -	3230.59
800	SPD 1	siCTRL	Tox-	siCT/ -	3191.33
801	SPD 1	siCTRL	Tox-	siCT/ -	1840.42
802	SPD 1	siCTRL	Tox-	siCT/ -	2520.83
803	SPD 1	siCTRL	Tox-	siCT/ -	14954.7
804	SPD 1	siCTRL	Tox-	siCT/ -	3123.92
805	SPD 1	siCTRL	Tox-	siCT/ -	2844.76
806	SPD 1	siCTRL	Tox-	siCT/ -	4277.03
807	SPD 1	siCTRL	Tox-	siCT/ -	3262.49
808	SPD 1	siCTRL	Tox-	siCT/ -	11963.9
809	SPD 1	siCTRL	Tox-	siCT/ -	2022.18
810	SPD 1	siCTRL	Tox-	siCT/ -	3820.3
811	SPD 1	siCTRL	Tox-	siCT/ -	2482.58
812	SPD 1	siCTRL	Tox-	siCT/ -	8221.19
813	SPD 1	siCTRL	Tox-	siCT/ -	4371.71
814	SPD 1	siCTRL	Tox-	siCT/ -	3938.64
815	SPD 1	siCTRL	Tox-	siCT/ -	2611.45
816	SPD 1	siCTRL	Tox-	siCT/ -	4637.56
817	SPD 1	siCTRL	Tox-	siCT/ -	2789.65
818	SPD 1	siCTRL	Tox-	siCT/ -	1339.3
819	SPD 1	siCTRL	Tox-	siCT/ -	3029.49
820	SPD 1	siCTRL	Tox-	siCT/ -	3660.11
821	SPD 1	siCTRL	Tox-	siCT/ -	12194.6
822	SPD 1	siCTRL	Tox-	siCT/ -	4453.2
823	SPD 1	siCTRL	Tox-	siCT/ -	7765.79
824	SPD 1	siCTRL	Tox-	siCT/ -	8119.09
825	SPD 1	siCTRL	Tox-	siCT/ -	10778.2
826	SPD 1	siCTRL	Tox-	siCT/ -	3258.37
827	SPD 1	siCTRL	Tox-	siCT/ -	2725.47
828	SPD 1	siCTRL	Tox-	siCT/ -	8043.87
829	SPD 1	siCTRL	Tox-	siCT/ -	5021.61
830	SPD 1	siCTRL	Tox-	siCT/ -	2595.91
831	SPD 1	siCTRL	Tox-	siCT/ -	2906.46
832	SPD 1	siCTRL	Tox-	siCT/ -	6315.44
833	SPD 1	siCTRL	Tox-	siCT/ -	8249.41
834	SPD 1	siCTRL	Tox-	siCT/ -	20098.7
835	SPD 1	siCTRL	Tox-	siCT/ -	9353.94
836	SPD 1	siCTRL	Tox-	siCT/ -	5247.12
837	SPD 1	siCTRL	Tox-	siCT/ -	4310.14
838	SPD 1	siCTRL	Tox-	siCT/ -	31272.3
839	SPD 1	siCTRL	Tox-	siCT/ -	12378.4
840	SPD 1	siCTRL	Tox-	siCT/ -	9261.35
841	SPD 1	siCTRL	Tox-	siCT/ -	7227.57
842	SPD 1	siCTRL	Tox-	siCT/ -	6707.55
843	SPD 1	siCTRL	Tox-	siCT/ -	7434.63
844	SPD 1	siCTRL	Tox-	siCT/ -	3702.09
845	SPD 1	siCTRL	Tox-	siCT/ -	8750.59
846	SPD 1	siCTRL	Tox-	siCT/ -	8857.39
847	SPD 1	siCTRL	Tox-	siCT/ -	2058.96
848	SPD 1	siCTRL	Tox-	siCT/ -	2465.27
849	SPD 1	siCTRL	Tox-	siCT/ -	5315.49
850	SPD 1	siCTRL	Tox-	siCT/ -	6192.92
851	SPD 1	siCTRL	Tox-	siCT/ -	8935.45
852	SPD 1	siCTRL	Tox-	siCT/ -	7981.22
853	SPD 1	siCTRL	Tox-	siCT/ -	7627.99
854	SPD 1	siCTRL	Tox-	siCT/ -	3601.64
855	SPD 1	siCTRL	Tox-	siCT/ -	2112.93
856	SPD 1	siCTRL	Tox-	siCT/ -	3249.49
857	SPD 1	siCTRL	Tox-	siCT/ -	10169.7
858	SPD 1	siCTRL	Tox-	siCT/ -	14011.4
859	SPD 1	siCTRL	Tox-	siCT/ -	10960.9
860	SPD 1	siCTRL	Tox-	siCT/ -	3259.32
861	SPD 1	siCTRL	Tox-	siCT/ -	26278.1
862	SPD 1	siCTRL	Tox-	siCT/ -	4619.42
863	SPD 1	siCTRL	Tox-	siCT/ -	7842.84
864	SPD 1	siCTRL	Tox-	siCT/ -	8862.97
865	SPD 1	siCTRL	Tox-	siCT/ -	8676.59
866	SPD 1	siCTRL	Tox-	siCT/ -	7062.5
867	SPD 1	siCTRL	Tox-	siCT/ -	7842.97
868	SPD 1	siCTRL	Tox-	siCT/ -	6935.66
869	SPD 1	siCTRL	Tox-	siCT/ -	7160.54
870	SPD 1	siCTRL	Tox-	siCT/ -	9638.18
871	SPD 1	siCTRL	Tox-	siCT/ -	3209.72
872	SPD 1	siCTRL	Tox-	siCT/ -	2698.2
873	SPD 1	siCTRL	Tox-	siCT/ -	4253.63
874	SPD 1	siCTRL	Tox-	siCT/ -	7493.67
875	SPD 1	siCTRL	Tox-	siCT/ -	8006.9
876	SPD 1	siCTRL	Tox-	siCT/ -	15678.5
877	SPD 1	siCTRL	Tox-	siCT/ -	5915.85
878	SPD 1	siCTRL	Tox-	siCT/ -	19280.8
879	SPD 1	siCTRL	Tox-	siCT/ -	3166.47
880	SPD 1	siCTRL	Tox-	siCT/ -	2100.24
881	SPD 1	siCTRL	Tox-	siCT/ -	3175.42
882	SPD 1	siCTRL	Tox-	siCT/ -	5689.52
883	SPD 1	siCTRL	Tox-	siCT/ -	5389.56
884	SPD 1	siCTRL	Tox-	siCT/ -	2896.63
885	SPD 1	siCTRL	Tox-	siCT/ -	3460.35
886	SPD 1	siCTRL	Tox-	siCT/ -	8291.33
887	SPD 1	siCTRL	Tox-	siCT/ -	26165.5
888	SPD 1	siCTRL	Tox-	siCT/ -	5722.69
889	SPD 1	siCTRL	Tox-	siCT/ -	4507.43
890	SPD 1	siCTRL	Tox-	siCT/ -	2564.58
891	SPD 1	siCTRL	Tox-	siCT/ -	3835.08
892	SPD 1	siCTRL	Tox-	siCT/ -	22939.1
893	SPD 1	siCTRL	Tox-	siCT/ -	4319.84
894	SPD 1	siCTRL	Tox-	siCT/ -	3377.97
895	SPD 1	siCTRL	Tox-	siCT/ -	16413.7
896	SPD 1	siCTRL	Tox-	siCT/ -	3389.26
897	SPD 1	siCTRL	Tox-	siCT/ -	6641.47
898	SPD 1	siCTRL	Tox-	siCT/ -	6891.33
899	SPD 1	siCTRL	Tox-	siCT/ -	3781.11
900	SPD 1	siCTRL	Tox-	siCT/ -	23996.9
901	SPD 1	siCTRL	Tox-	siCT/ -	32703.9
902	SPD 1	siCTRL	Tox-	siCT/ -	6074.4
903	SPD 1	siCTRL	Tox-	siCT/ -	21421.6
904	SPD 1	siCTRL	Tox-	siCT/ -	7269.87
905	SPD 1	siCTRL	Tox-	siCT/ -	2892.96
906	SPD 1	siCTRL	Tox-	siCT/ -	9134.71
907	SPD 1	siCTRL	Tox-	siCT/ -	20786.8
908	SPD 1	siCTRL	Tox-	siCT/ -	39438.6
909	SPD 1	siCTRL	Tox-	siCT/ -	1801.99
910	SPD 1	siCTRL	Tox-	siCT/ -	3230.97
911	SPD 1	siCTRL	Tox-	siCT/ -	33589.6
912	SPD 1	siCTRL	Tox-	siCT/ -	5247.82
913	SPD 1	siCTRL	Tox-	siCT/ -	2665.54
914	SPD 1	siCTRL	Tox-	siCT/ -	2293.98
915	SPD 1	siCTRL	Tox-	siCT/ -	5571.94
916	SPD 1	siCTRL	Tox-	siCT/ -	15110.5
917	SPD 1	siCTRL	Tox-	siCT/ -	4832.12
918	SPD 1	siCTRL	Tox-	siCT/ -	3875.86
919	SPD 1	siCTRL	Tox-	siCT/ -	2666.24
920	SPD 1	siCTRL	Tox-	siCT/ -	5727.38
921	SPD 1	siCTRL	Tox-	siCT/ -	2306.29
922	SPD 1	siCTRL	Tox-	siCT/ -	5531.29
923	SPD 1	siCTRL	Tox-	siCT/ -	13478.3
924	SPD 1	siCTRL	Tox-	siCT/ -	2457.92
925	SPD 1	siCTRL	Tox-	siCT/ -	4114.87
926	SPD 1	siCTRL	Tox-	siCT/ -	21606.4
927	SPD 1	siCTRL	Tox-	siCT/ -	2882.94
928	SPD 1	siCTRL	Tox+	siCT/ +	9159.57
929	SPD 1	siCTRL	Tox+	siCT/ +	2961.7
930	SPD 1	siCTRL	Tox+	siCT/ +	6725.75
931	SPD 1	siCTRL	Tox+	siCT/ +	4017.09
932	SPD 1	siCTRL	Tox+	siCT/ +	16885.3
933	SPD 1	siCTRL	Tox+	siCT/ +	3667.15
934	SPD 1	siCTRL	Tox+	siCT/ +	10195.9
935	SPD 1	siCTRL	Tox+	siCT/ +	3698.29
936	SPD 1	siCTRL	Tox+	siCT/ +	10191.4
937	SPD 1	siCTRL	Tox+	siCT/ +	10441.2
938	SPD 1	siCTRL	Tox+	siCT/ +	18641.9
939	SPD 1	siCTRL	Tox+	siCT/ +	27819.9
940	SPD 1	siCTRL	Tox+	siCT/ +	2803.09
941	SPD 1	siCTRL	Tox+	siCT/ +	9582.88
942	SPD 1	siCTRL	Tox+	siCT/ +	7713.28
943	SPD 1	siCTRL	Tox+	siCT/ +	4270.25
944	SPD 1	siCTRL	Tox+	siCT/ +	2104.43
945	SPD 1	siCTRL	Tox+	siCT/ +	3480.51
946	SPD 1	siCTRL	Tox+	siCT/ +	13001.6
947	SPD 1	siCTRL	Tox+	siCT/ +	5025.61
948	SPD 1	siCTRL	Tox+	siCT/ +	8563.4
949	SPD 1	siCTRL	Tox+	siCT/ +	13747.4
950	SPD 1	siCTRL	Tox+	siCT/ +	7054.95
951	SPD 1	siCTRL	Tox+	siCT/ +	4814.94
952	SPD 1	siCTRL	Tox+	siCT/ +	24003.3
953	SPD 1	siCTRL	Tox+	siCT/ +	18026.3
954	SPD 1	siCTRL	Tox+	siCT/ +	8400.02
955	SPD 1	siCTRL	Tox+	siCT/ +	16349.3
956	SPD 1	siCTRL	Tox+	siCT/ +	2716.4
957	SPD 1	siCTRL	Tox+	siCT/ +	1886.28
958	SPD 1	siCTRL	Tox+	siCT/ +	2153.32
959	SPD 1	siCTRL	Tox+	siCT/ +	12007.3
960	SPD 1	siCTRL	Tox+	siCT/ +	10990
961	SPD 1	siCTRL	Tox+	siCT/ +	4017.72
962	SPD 1	siCTRL	Tox+	siCT/ +	1193.13
963	SPD 1	siCTRL	Tox+	siCT/ +	10323.5
964	SPD 1	siCTRL	Tox+	siCT/ +	4783.29
965	SPD 1	siCTRL	Tox+	siCT/ +	2528.75
966	SPD 1	siCTRL	Tox+	siCT/ +	6406.7
967	SPD 1	siCTRL	Tox+	siCT/ +	7011.13
968	SPD 1	siCTRL	Tox+	siCT/ +	2928.91
969	SPD 1	siCTRL	Tox+	siCT/ +	10066.5
970	SPD 1	siCTRL	Tox+	siCT/ +	9103.51
971	SPD 1	siCTRL	Tox+	siCT/ +	7074.86
972	SPD 1	siCTRL	Tox+	siCT/ +	3386.34
973	SPD 1	siCTRL	Tox+	siCT/ +	5714.06
974	SPD 1	siCTRL	Tox+	siCT/ +	24280.1
975	SPD 1	siCTRL	Tox+	siCT/ +	13077.7
976	SPD 1	siCTRL	Tox+	siCT/ +	5062.26
977	SPD 1	siCTRL	Tox+	siCT/ +	10115.3
978	SPD 1	siCTRL	Tox+	siCT/ +	13248.8
979	SPD 1	siCTRL	Tox+	siCT/ +	4028.06
980	SPD 1	siCTRL	Tox+	siCT/ +	7195.74
981	SPD 1	siCTRL	Tox+	siCT/ +	4604.26
982	SPD 1	siCTRL	Tox+	siCT/ +	3220.76
983	SPD 1	siCTRL	Tox+	siCT/ +	5815.34
984	SPD 1	siCTRL	Tox+	siCT/ +	11523.4
985	SPD 1	siCTRL	Tox+	siCT/ +	5803.04
986	SPD 1	siCTRL	Tox+	siCT/ +	6568.41
987	SPD 1	siCTRL	Tox+	siCT/ +	5993.1
988	SPD 1	siCTRL	Tox+	siCT/ +	8530.28
989	SPD 1	siCTRL	Tox+	siCT/ +	2432.87
990	SPD 1	siCTRL	Tox+	siCT/ +	6400.11
991	SPD 1	siCTRL	Tox+	siCT/ +	2365.64
992	SPD 1	siCTRL	Tox+	siCT/ +	3096.52
993	SPD 1	siCTRL	Tox+	siCT/ +	84480.2
994	SPD 1	siCTRL	Tox+	siCT/ +	33974
995	SPD 1	siCTRL	Tox+	siCT/ +	28784.6
996	SPD 1	siCTRL	Tox+	siCT/ +	7995.87
997	SPD 1	siCTRL	Tox+	siCT/ +	3216.26
998	SPD 1	siCTRL	Tox+	siCT/ +	28520.7
999	SPD 1	siCTRL	Tox+	siCT/ +	31430.2
1000	SPD 1	siCTRL	Tox+	siCT/ +	9029.88
1001	SPD 1	siCTRL	Tox+	siCT/ +	17490.9
1002	SPD 1	siCTRL	Tox+	siCT/ +	15159
1003	SPD 1	siCTRL	Tox+	siCT/ +	3782.76
1004	SPD 1	siCTRL	Tox+	siCT/ +	4024.76
1005	SPD 1	siCTRL	Tox+	siCT/ +	8699.48
1006	SPD 1	siCTRL	Tox+	siCT/ +	2865.5
1007	SPD 1	siCTRL	Tox+	siCT/ +	4367.53
1008	SPD 1	siCTRL	Tox+	siCT/ +	14631
1009	SPD 1	siCTRL	Tox+	siCT/ +	2742.88
1010	SPD 1	siCTRL	Tox+	siCT/ +	4439.63
1011	SPD 1	siCTRL	Tox+	siCT/ +	3144.28
1012	SPD 1	siCTRL	Tox+	siCT/ +	5356.39
1013	SPD 1	siCTRL	Tox+	siCT/ +	20825.4
1014	SPD 1	siCTRL	Tox+	siCT/ +	4936.12
1015	SPD 1	siCTRL	Tox+	siCT/ +	4468.42
1016	SPD 1	siCTRL	Tox+	siCT/ +	25820.2
1017	SPD 1	siCTRL	Tox+	siCT/ +	13184.8
1018	SPD 1	siCTRL	Tox+	siCT/ +	12570.8
1019	SPD 1	siCTRL	Tox+	siCT/ +	2229.74
1020	SPD 1	siCTRL	Tox+	siCT/ +	17496.4
1021	SPD 1	siCTRL	Tox+	siCT/ +	10126
1022	SPD 1	siCTRL	Tox+	siCT/ +	3709.45
1023	SPD 1	siCTRL	Tox+	siCT/ +	15073.9
1024	SPD 1	siCTRL	Tox+	siCT/ +	2430.77
1025	SPD 1	siCTRL	Tox+	siCT/ +	6632.85
1026	SPD 1	siCTRL	Tox+	siCT/ +	13754.3
1027	SPD 1	siCTRL	Tox+	siCT/ +	2926.19
1028	SPD 1	siCTRL	Tox+	siCT/ +	4348
1029	SPD 1	siCTRL	Tox+	siCT/ +	14020.7
1030	SPD 1	siCTRL	Tox+	siCT/ +	5769.36
1031	SPD 1	siCTRL	Tox+	siCT/ +	2185.79
1032	SPD 1	siCTRL	Tox+	siCT/ +	2168.04
1033	SPD 1	siCTRL	Tox+	siCT/ +	25021.7
1034	SPD 1	siCTRL	Tox+	siCT/ +	4597.67
1035	SPD 1	siCTRL	Tox+	siCT/ +	10565.8
1036	SPD 1	siCTRL	Tox+	siCT/ +	3913.97
1037	SPD 1	siCTRL	Tox+	siCT/ +	4145.06
1038	SPD 1	siCTRL	Tox+	siCT/ +	6346.58
1039	SPD 1	siCTRL	Tox+	siCT/ +	10681.1
1040	SPD 1	siCTRL	Tox+	siCT/ +	3800.9
1041	SPD 1	siCTRL	Tox+	siCT/ +	12553.3
1042	SPD 1	siCTRL	Tox+	siCT/ +	11537.8
1043	SPD 1	siCTRL	Tox+	siCT/ +	2865.12
1044	SPD 1	siCTRL	Tox+	siCT/ +	9102.62
1045	SPD 1	siCTRL	Tox+	siCT/ +	4547.19
1046	SPD 1	siCTRL	Tox+	siCT/ +	11440
1047	SPD 1	siCTRL	Tox+	siCT/ +	3218.1
1048	SPD 1	siCTRL	Tox+	siCT/ +	4154.89
1049	SPD 1	siCTRL	Tox+	siCT/ +	20564.2
1050	SPD 1	siCTRL	Tox+	siCT/ +	6596.13
1051	SPD 1	siCTRL	Tox+	siCT/ +	17187
1052	SPD 1	siCTRL	Tox+	siCT/ +	12618.2
1053	SPD 1	siCTRL	Tox+	siCT/ +	30850.7
1054	SPD 1	siCTRL	Tox+	siCT/ +	17308.1
1055	SPD 1	siCTRL	Tox+	siCT/ +	14042
1056	SPD 1	siCTRL	Tox+	siCT/ +	14885
1057	SPD 1	siCTRL	Tox+	siCT/ +	13823.4
1058	SPD 1	siCTRL	Tox+	siCT/ +	14632.8
1059	SPD 1	siCTRL	Tox+	siCT/ +	12110.7
1060	SPD 1	siCTRL	Tox+	siCT/ +	24351.2
1061	SPD 1	siCTRL	Tox+	siCT/ +	9164.26
1062	SPD 1	siCTRL	Tox+	siCT/ +	29091.1
1063	SPD 1	siCTRL	Tox+	siCT/ +	4328.34
1064	SPD 1	siCTRL	Tox+	siCT/ +	14599.2
1065	SPD 1	siCTRL	Tox+	siCT/ +	3027.4
1066	SPD 1	siCTRL	Tox+	siCT/ +	20905.8
1067	SPD 1	siCTRL	Tox+	siCT/ +	21645.2
1068	SPD 1	siCTRL	Tox+	siCT/ +	20667.2
1069	SPD 1	siCTRL	Tox+	siCT/ +	3348.67
1070	SPD 1	siCTRL	Tox+	siCT/ +	3693.6
1071	SPD 1	siCTRL	Tox+	siCT/ +	17792.6
1072	SPD 1	siCTRL	Tox+	siCT/ +	26622.8
1073	SPD 1	siCTRL	Tox+	siCT/ +	4784.24
1074	SPD 1	siCTRL	Tox+	siCT/ +	23252
1075	SPD 1	siCTRL	Tox+	siCT/ +	5091.31
1076	SPD 1	siCTRL	Tox+	siCT/ +	4051.27
1077	SPD 1	siCTRL	Tox+	siCT/ +	3925.7
1078	SPD 1	siCTRL	Tox+	siCT/ +	5755.16
1079	SPD 1	siCTRL	Tox+	siCT/ +	5274.96
1080	SPD 1	siCTRL	Tox+	siCT/ +	27565.7
1081	SPD 1	siCTRL	Tox+	siCT/ +	7986.1
1082	SPD 1	siCTRL	Tox+	siCT/ +	23202.1
1083	SPD 1	siCTRL	Tox+	siCT/ +	6574.31
1084	SPD 1	siCTRL	Tox+	siCT/ +	6894.44
1085	SPD 1	siCTRL	Tox+	siCT/ +	15759.5
1086	SPD 1	siCTRL	Tox+	siCT/ +	7767.19
1087	SPD 1	siCTRL	Tox+	siCT/ +	6964.71
1088	SPD 1	siCTRL	Tox+	siCT/ +	9809.59
1089	SPD 1	siCTRL	Tox+	siCT/ +	22141.7
1090	SPD 1	siCTRL	Tox+	siCT/ +	26529.6
1091	SPD 1	siCTRL	Tox+	siCT/ +	5449.11
1092	SPD 1	siCTRL	Tox+	siCT/ +	2238.68
1093	SPD 1	siCTRL	Tox+	siCT/ +	3252.66
2251	SPD 3	siCAV1	Tox-	siCAV 1/-	11856.8
2252	SPD 3	siCAV1	Tox-	siCAV 1/-	9395.35
2253	SPD 3	siCAV1	Tox-	siCAV 1/-	6080.61
2254	SPD 3	siCAV1	Tox-	siCAV 1/-	19485.9
2255	SPD 3	siCAV1	Tox-	siCAV 1/-	5536.56
2256	SPD 3	siCAV1	Tox-	siCAV 1/-	2626.03
2257	SPD 3	siCAV1	Tox-	siCAV 1/-	19509.4
2258	SPD 3	siCAV1	Tox-	siCAV 1/-	5136.33
2259	SPD 3	siCAV1	Tox-	siCAV 1/-	2483.22
2260	SPD 3	siCAV1	Tox-	siCAV 1/-	4862.24
2261	SPD 3	siCAV1	Tox-	siCAV 1/-	5124.79
2262	SPD 3	siCAV1	Tox-	siCAV 1/-	1555.49
2263	SPD 3	siCAV1	Tox-	siCAV 1/-	16896
2264	SPD 3	siCAV1	Tox-	siCAV 1/-	1514.33
2265	SPD 3	siCAV1	Tox-	siCAV 1/-	24181.5
2266	SPD 3	siCAV1	Tox-	siCAV 1/-	5951.94
2267	SPD 3	siCAV1	Tox-	siCAV 1/-	9214.43
2268	SPD 3	siCAV1	Tox-	siCAV 1/-	1367.46
2269	SPD 3	siCAV1	Tox-	siCAV 1/-	3804
2270	SPD 3	siCAV1	Tox-	siCAV 1/-	3052.39
2271	SPD 3	siCAV1	Tox-	siCAV 1/-	7699.08
2272	SPD 3	siCAV1	Tox-	siCAV 1/-	7684.87
2273	SPD 3	siCAV1	Tox-	siCAV 1/-	3324.32
2274	SPD 3	siCAV1	Tox-	siCAV 1/-	1859.89
2275	SPD 3	siCAV1	Tox-	siCAV 1/-	5696.88
2276	SPD 3	siCAV1	Tox-	siCAV 1/-	4943.74
2277	SPD 3	siCAV1	Tox-	siCAV 1/-	4763
2278	SPD 3	siCAV1	Tox-	siCAV 1/-	8923.47
2279	SPD 3	siCAV1	Tox-	siCAV 1/-	4022.86
2280	SPD 3	siCAV1	Tox-	siCAV 1/-	10143.5
2281	SPD 3	siCAV1	Tox-	siCAV 1/-	4821.66
2282	SPD 3	siCAV1	Tox-	siCAV 1/-	6110.04
2283	SPD 3	siCAV1	Tox-	siCAV 1/-	7385.86
2284	SPD 3	siCAV1	Tox-	siCAV 1/-	17568.3
2285	SPD 3	siCAV1	Tox-	siCAV 1/-	3019.85
2286	SPD 3	siCAV1	Tox-	siCAV 1/-	1404.24
2287	SPD 3	siCAV1	Tox-	siCAV 1/-	14742.7
2288	SPD 3	siCAV1	Tox-	siCAV 1/-	9522.82
2289	SPD 3	siCAV1	Tox-	siCAV 1/-	2220.36
2290	SPD 3	siCAV1	Tox-	siCAV 1/-	5493.37
2291	SPD 3	siCAV1	Tox-	siCAV 1/-	5212.12
2292	SPD 3	siCAV1	Tox-	siCAV 1/-	5878.12
2293	SPD 3	siCAV1	Tox-	siCAV 1/-	3413.74
2294	SPD 3	siCAV1	Tox-	siCAV 1/-	10166.1
2295	SPD 3	siCAV1	Tox-	siCAV 1/-	3677.87
2296	SPD 3	siCAV1	Tox-	siCAV 1/-	4669.58
2297	SPD 3	siCAV1	Tox-	siCAV 1/-	2400.27
2298	SPD 3	siCAV1	Tox-	siCAV 1/-	2316.37
2299	SPD 3	siCAV1	Tox-	siCAV 1/-	4924.33
2300	SPD 3	siCAV1	Tox-	siCAV 1/-	4729.77
2301	SPD 3	siCAV1	Tox-	siCAV 1/-	2567.25
2302	SPD 3	siCAV1	Tox-	siCAV 1/-	2262.02
2304	SPD 3	siCAV1	Tox-	siCAV 1/-	15262.8
2305	SPD 3	siCAV1	Tox-	siCAV 1/-	22287.9
2306	SPD 3	siCAV1	Tox-	siCAV 1/-	1576.23
2307	SPD 3	siCAV1	Tox-	siCAV 1/-	1743.9
2308	SPD 3	siCAV1	Tox-	siCAV 1/-	7589.11
2309	SPD 3	siCAV1	Tox-	siCAV 1/-	3981.45
2310	SPD 3	siCAV1	Tox-	siCAV 1/-	1948.99
2311	SPD 3	siCAV1	Tox-	siCAV 1/-	9223.24
2312	SPD 3	siCAV1	Tox-	siCAV 1/-	5141.03
2313	SPD 3	siCAV1	Tox-	siCAV 1/-	2094.92
2314	SPD 3	siCAV1	Tox-	siCAV 1/-	1799.65
2315	SPD 3	siCAV1	Tox-	siCAV 1/-	1601.98
2316	SPD 3	siCAV1	Tox-	siCAV 1/-	8370.35
2317	SPD 3	siCAV1	Tox-	siCAV 1/-	5037.78
2318	SPD 3	siCAV1	Tox-	siCAV 1/-	2214.27
2319	SPD 3	siCAV1	Tox-	siCAV 1/-	4863.51
2320	SPD 3	siCAV1	Tox-	siCAV 1/-	7407.36
2321	SPD 3	siCAV1	Tox-	siCAV 1/-	7862.44
2322	SPD 3	siCAV1	Tox-	siCAV 1/-	1420.6
2323	SPD 3	siCAV1	Tox-	siCAV 1/-	8588.18
2324	SPD 3	siCAV1	Tox-	siCAV 1/-	2790.73
2325	SPD 3	siCAV1	Tox-	siCAV 1/-	2630.28
2326	SPD 3	siCAV1	Tox-	siCAV 1/-	9556.88
2327	SPD 3	siCAV1	Tox-	siCAV 1/-	8022.63
2328	SPD 3	siCAV1	Tox-	siCAV 1/-	11356.5
2329	SPD 3	siCAV1	Tox-	siCAV 1/-	11826.2
2330	SPD 3	siCAV1	Tox-	siCAV 1/-	2633.83
2331	SPD 3	siCAV1	Tox-	siCAV 1/-	1924.13
2332	SPD 3	siCAV1	Tox-	siCAV 1/-	5130.62
2333	SPD 3	siCAV1	Tox-	siCAV 1/-	5188.08
2334	SPD 3	siCAV1	Tox-	siCAV 1/-	8144.01
2335	SPD 3	siCAV1	Tox-	siCAV 1/-	1708.83
2336	SPD 3	siCAV1	Tox-	siCAV 1/-	5046.22
2337	SPD 3	siCAV1	Tox-	siCAV 1/-	4829.33
2338	SPD 3	siCAV1	Tox-	siCAV 1/-	2910.02
2339	SPD 3	siCAV1	Tox-	siCAV 1/-	8374.34
2340	SPD 3	siCAV1	Tox-	siCAV 1/-	3712.37
2341	SPD 3	siCAV1	Tox-	siCAV 1/-	3276.19
2343	SPD 3	siCAV1	Tox-	siCAV 1/-	6196.6
2344	SPD 3	siCAV1	Tox-	siCAV 1/-	3993.88
2345	SPD 3	siCAV1	Tox-	siCAV 1/-	8115.73
2346	SPD 3	siCAV1	Tox-	siCAV 1/-	4538.44
2347	SPD 3	siCAV1	Tox-	siCAV 1/-	4806.88
2348	SPD 3	siCAV1	Tox-	siCAV 1/-	8926.01
2349	SPD 3	siCAV1	Tox-	siCAV 1/-	9124.94
2350	SPD 3	siCAV1	Tox-	siCAV 1/-	6235.16
2351	SPD 3	siCAV1	Tox-	siCAV 1/-	2816.03
2352	SPD 3	siCAV1	Tox-	siCAV 1/-	3133.56
2353	SPD 3	siCAV1	Tox-	siCAV 1/-	2070.69
2354	SPD 3	siCAV1	Tox-	siCAV 1/-	4333.35
2355	SPD 3	siCAV1	Tox-	siCAV 1/-	3839.14
2356	SPD 3	siCAV1	Tox-	siCAV 1/-	4096.55
2357	SPD 3	siCAV1	Tox-	siCAV 1/-	3413.42
2358	SPD 3	siCAV1	Tox-	siCAV 1/-	7226.94
2359	SPD 3	siCAV1	Tox-	siCAV 1/-	2927.84
2360	SPD 3	siCAV1	Tox-	siCAV 1/-	3921.64
2361	SPD 3	siCAV1	Tox-	siCAV 1/-	1554.35
2362	SPD 3	siCAV1	Tox-	siCAV 1/-	2897.9
2363	SPD 3	siCAV1	Tox-	siCAV 1/-	6736.66
2364	SPD 3	siCAV1	Tox-	siCAV 1/-	11306.7
2365	SPD 3	siCAV1	Tox-	siCAV 1/-	3008.69
2366	SPD 3	siCAV1	Tox-	siCAV 1/-	2983.96
2367	SPD 3	siCAV1	Tox-	siCAV 1/-	5869.18
2368	SPD 3	siCAV1	Tox-	siCAV 1/-	2986.81
2369	SPD 3	siCAV1	Tox-	siCAV 1/-	2163.79
2370	SPD 3	siCAV1	Tox-	siCAV 1/-	5088.58
2371	SPD 3	siCAV1	Tox-	siCAV 1/-	2169.62
2372	SPD 3	siCAV1	Tox-	siCAV 1/-	2184.84
2373	SPD 3	siCAV1	Tox-	siCAV 1/-	9519.21
2374	SPD 3	siCAV1	Tox-	siCAV 1/-	10331.1
2375	SPD 3	siCAV1	Tox-	siCAV 1/-	3127.22
2376	SPD 3	siCAV1	Tox-	siCAV 1/-	2026.24
2377	SPD 3	siCAV1	Tox-	siCAV 1/-	14497.3
2378	SPD 3	siCAV1	Tox-	siCAV 1/-	3038.75
2379	SPD 3	siCAV1	Tox-	siCAV 1/-	9606.66
2380	SPD 3	siCAV1	Tox-	siCAV 1/-	2544.04
2381	SPD 3	siCAV1	Tox-	siCAV 1/-	2572.95
2382	SPD 3	siCAV1	Tox-	siCAV 1/-	16937.7
2383	SPD 3	siCAV1	Tox-	siCAV 1/-	4505.02
2384	SPD 3	siCAV1	Tox-	siCAV 1/-	10550.9
2385	SPD 3	siCAV1	Tox-	siCAV 1/-	11674.5
2386	SPD 3	siCAV1	Tox-	siCAV 1/-	3889.11
2387	SPD 3	siCAV1	Tox-	siCAV 1/-	3655.55
2388	SPD 3	siCAV1	Tox-	siCAV 1/-	4989.08
2389	SPD 3	siCAV1	Tox-	siCAV 1/-	5144.2
2390	SPD 3	siCAV1	Tox-	siCAV 1/-	2755.53
2391	SPD 3	siCAV1	Tox-	siCAV 1/-	8082.5
2392	SPD 3	siCAV1	Tox-	siCAV 1/-	1721.01
2393	SPD 3	siCAV1	Tox-	siCAV 1/-	2982.12
2394	SPD 3	siCAV1	Tox-	siCAV 1/-	4018.29
2395	SPD 3	siCAV1	Tox-	siCAV 1/-	4390.93
2396	SPD 3	siCAV1	Tox-	siCAV 1/-	1795.27
2397	SPD 3	siCAV1	Tox-	siCAV 1/-	5967.29
2398	SPD 3	siCAV1	Tox-	siCAV 1/-	7509.02
2399	SPD 3	siCAV1	Tox+	siCAV 1 /+	5687.68
2400	SPD 3	siCAV1	Tox+	siCAV 1 /+	6463.97
2401	SPD 3	siCAV1	Tox+	siCAV 1 /+	3760.18
2402	SPD 3	siCAV1	Tox+	siCAV 1 /+	6273.72
2403	SPD 3	siCAV1	Tox+	siCAV 1 /+	4644.34
2404	SPD 3	siCAV1	Tox+	siCAV 1 /+	5532.5
2405	SPD 3	siCAV1	Tox+	siCAV 1 /+	13556.8
2406	SPD 3	siCAV1	Tox+	siCAV 1 /+	6886.96
2407	SPD 3	siCAV1	Tox+	siCAV 1 /+	8460.84
2408	SPD 3	siCAV1	Tox+	siCAV 1 /+	8060.36
2409	SPD 3	siCAV1	Tox+	siCAV 1 /+	10648.6
2410	SPD 3	siCAV1	Tox+	siCAV 1 /+	3096.21
2411	SPD 3	siCAV1	Tox+	siCAV 1 /+	39236.3
2412	SPD 3	siCAV1	Tox+	siCAV 1 /+	3408.66
2413	SPD 3	siCAV1	Tox+	siCAV 1 /+	4683.79
2414	SPD 3	siCAV1	Tox+	siCAV 1 /+	10086.3
2415	SPD 3	siCAV1	Tox+	siCAV 1 /+	6035.9
2416	SPD 3	siCAV1	Tox+	siCAV 1 /+	5037.21
2417	SPD 3	siCAV1	Tox+	siCAV 1 /+	3793.92
2418	SPD 3	siCAV1	Tox+	siCAV 1 /+	15926.9
2419	SPD 3	siCAV1	Tox+	siCAV 1 /+	3907.82
2420	SPD 3	siCAV1	Tox+	siCAV 1 /+	2468.19
2421	SPD 3	siCAV1	Tox+	siCAV 1 /+	24686.5
2422	SPD 3	siCAV1	Tox+	siCAV 1 /+	2031.94
2423	SPD 3	siCAV1	Tox+	siCAV 1 /+	2971.72
2424	SPD 3	siCAV1	Tox+	siCAV 1 /+	4706.68
2425	SPD 3	siCAV1	Tox+	siCAV 1 /+	5504.34
2426	SPD 3	siCAV1	Tox+	siCAV 1 /+	12820.6
2427	SPD 3	siCAV1	Tox+	siCAV 1 /+	7916.91
2428	SPD 3	siCAV1	Tox+	siCAV 1 /+	8057.7
2429	SPD 3	siCAV1	Tox+	siCAV 1 /+	5326.58
2430	SPD 3	siCAV1	Tox+	siCAV 1 /+	2953.46
2431	SPD 3	siCAV1	Tox+	siCAV 1 /+	10914
2432	SPD 3	siCAV1	Tox+	siCAV 1 /+	2352.01
2433	SPD 3	siCAV1	Tox+	siCAV 1 /+	13795.6
2434	SPD 3	siCAV1	Tox+	siCAV 1 /+	33130.7
2435	SPD 3	siCAV1	Tox+	siCAV 1 /+	5839.18
2436	SPD 3	siCAV1	Tox+	siCAV 1 /+	13550.2
2437	SPD 3	siCAV1	Tox+	siCAV 1 /+	2684.69
2438	SPD 3	siCAV1	Tox+	siCAV 1 /+	3774.39
2439	SPD 3	siCAV1	Tox+	siCAV 1 /+	9148.85
2440	SPD 3	siCAV1	Tox+	siCAV 1 /+	8368.25
2441	SPD 3	siCAV1	Tox+	siCAV 1 /+	4281.98
2442	SPD 3	siCAV1	Tox+	siCAV 1 /+	5837.85
2443	SPD 3	siCAV1	Tox+	siCAV 1 /+	3383.23
2444	SPD 3	siCAV1	Tox+	siCAV 1 /+	2617.92
2445	SPD 3	siCAV1	Tox+	siCAV 1 /+	13440
2446	SPD 3	siCAV1	Tox+	siCAV 1 /+	3638.99
2447	SPD 3	siCAV1	Tox+	siCAV 1 /+	4014.8
2448	SPD 3	siCAV1	Tox+	siCAV 1 /+	8237.17
2449	SPD 3	siCAV1	Tox+	siCAV 1 /+	9171.49
2450	SPD 3	siCAV1	Tox+	siCAV 1 /+	12663
2451	SPD 3	siCAV1	Tox+	siCAV 1 /+	14760.7
2452	SPD 3	siCAV1	Tox+	siCAV 1 /+	4305.44
2453	SPD 3	siCAV1	Tox+	siCAV 1 /+	2211.73
2454	SPD 3	siCAV1	Tox+	siCAV 1 /+	3809.01
2455	SPD 3	siCAV1	Tox+	siCAV 1 /+	8617.04
2456	SPD 3	siCAV1	Tox+	siCAV 1 /+	3733.8
2457	SPD 3	siCAV1	Tox+	siCAV 1 /+	2772.91
2458	SPD 3	siCAV1	Tox+	siCAV 1 /+	12658.7
2459	SPD 3	siCAV1	Tox+	siCAV 1 /+	14080.9
2460	SPD 3	siCAV1	Tox+	siCAV 1 /+	6900.85
2461	SPD 3	siCAV1	Tox+	siCAV 1 /+	8772.22
2462	SPD 3	siCAV1	Tox+	siCAV 1 /+	6338.15
2463	SPD 3	siCAV1	Tox+	siCAV 1 /+	3667.21
2464	SPD 3	siCAV1	Tox+	siCAV 1 /+	16291.4
2465	SPD 3	siCAV1	Tox+	siCAV 1 /+	13186.4
2466	SPD 3	siCAV1	Tox+	siCAV 1 /+	9310.69
2467	SPD 3	siCAV1	Tox+	siCAV 1 /+	11470.9
2468	SPD 3	siCAV1	Tox+	siCAV 1 /+	13333.1
2469	SPD 3	siCAV1	Tox+	siCAV 1 /+	8940.97
2470	SPD 3	siCAV1	Tox+	siCAV 1 /+	10899.7
2471	SPD 3	siCAV1	Tox+	siCAV 1 /+	6728.16
2472	SPD 3	siCAV1	Tox+	siCAV 1 /+	4673.32
2473	SPD 3	siCAV1	Tox+	siCAV 1 /+	5944.2
2474	SPD 3	siCAV1	Tox+	siCAV 1 /+	3138.44
2475	SPD 3	siCAV1	Tox+	siCAV 1 /+	14095.2
2476	SPD 3	siCAV1	Tox+	siCAV 1 /+	11501.9
2477	SPD 3	siCAV1	Tox+	siCAV 1 /+	18227.8
2478	SPD 3	siCAV1	Tox+	siCAV 1 /+	7943.68
2479	SPD 3	siCAV1	Tox+	siCAV 1 /+	4872.14
2480	SPD 3	siCAV1	Tox+	siCAV 1 /+	7085.71
2481	SPD 3	siCAV1	Tox+	siCAV 1 /+	3541.4
2482	SPD 3	siCAV1	Tox+	siCAV 1 /+	2759.72
2483	SPD 3	siCAV1	Tox+	siCAV 1 /+	6855.12
2484	SPD 3	siCAV1	Tox+	siCAV 1 /+	25830
2485	SPD 3	siCAV1	Tox+	siCAV 1 /+	6380.76
2486	SPD 3	siCAV1	Tox+	siCAV 1 /+	6382.67
2487	SPD 3	siCAV1	Tox+	siCAV 1 /+	15282.7
2488	SPD 3	siCAV1	Tox+	siCAV 1 /+	6403.09
2489	SPD 3	siCAV1	Tox+	siCAV 1 /+	6866.09
2490	SPD 3	siCAV1	Tox+	siCAV 1 /+	8063.34
2491	SPD 3	siCAV1	Tox+	siCAV 1 /+	10014.9
2492	SPD 3	siCAV1	Tox+	siCAV 1 /+	6397.06
2493	SPD 3	siCAV1	Tox+	siCAV 1 /+	6712.69
2494	SPD 3	siCAV1	Tox+	siCAV 1 /+	6112.57
2495	SPD 3	siCAV1	Tox+	siCAV 1 /+	7049.43
2496	SPD 3	siCAV1	Tox+	siCAV 1 /+	6677.43
2497	SPD 3	siCAV1	Tox+	siCAV 1 /+	6781.81
2498	SPD 3	siCAV1	Tox+	siCAV 1 /+	6653.01
2499	SPD 3	siCAV1	Tox+	siCAV 1 /+	3567.46
2500	SPD 3	siCAV1	Tox+	siCAV 1 /+	2736.51
2501	SPD 3	siCAV1	Tox+	siCAV 1 /+	7163.39
2502	SPD 3	siCAV1	Tox+	siCAV 1 /+	7679.67
2503	SPD 3	siCAV1	Tox+	siCAV 1 /+	26387.7
2504	SPD 3	siCAV1	Tox+	siCAV 1 /+	12740
2505	SPD 3	siCAV1	Tox+	siCAV 1 /+	28504.7
2506	SPD 3	siCAV1	Tox+	siCAV 1 /+	12568.4
2507	SPD 3	siCAV1	Tox+	siCAV 1 /+	9879.1
2508	SPD 3	siCAV1	Tox+	siCAV 1 /+	4489.67
2509	SPD 3	siCAV1	Tox+	siCAV 1 /+	11867.1
2510	SPD 3	siCAV1	Tox+	siCAV 1 /+	2149.46
2511	SPD 3	siCAV1	Tox+	siCAV 1 /+	41063
2512	SPD 3	siCAV1	Tox+	siCAV 1 /+	6330.28
2513	SPD 3	siCAV1	Tox+	siCAV 1 /+	4918.81
2514	SPD 3	siCAV1	Tox+	siCAV 1 /+	9676.16
2515	SPD 3	siCAV1	Tox+	siCAV 1 /+	11332.7
2516	SPD 3	siCAV1	Tox+	siCAV 1 /+	10277.1
2517	SPD 3	siCAV1	Tox+	siCAV 1 /+	11279.9
2518	SPD 3	siCAV1	Tox+	siCAV 1 /+	10744.8
2519	SPD 3	siCAV1	Tox+	siCAV 1 /+	13209.3
2520	SPD 3	siCAV1	Tox+	siCAV 1 /+	8286
2521	SPD 3	siCAV1	Tox+	siCAV 1 /+	3912.96
2522	SPD 3	siCAV1	Tox+	siCAV 1 /+	20424.2
2523	SPD 3	siCAV1	Tox+	siCAV 1 /+	3206.81
2524	SPD 3	siCAV1	Tox+	siCAV 1 /+	3862.16
2525	SPD 3	siCAV1	Tox+	siCAV 1 /+	18466
2526	SPD 3	siCAV1	Tox+	siCAV 1 /+	7060.21
2527	SPD 3	siCAV1	Tox+	siCAV 1 /+	5749.38
2528	SPD 3	siCAV1	Tox+	siCAV 1 /+	20108.3
2529	SPD 3	siCAV1	Tox+	siCAV 1 /+	5489.37
2530	SPD 3	siCAV1	Tox+	siCAV 1 /+	20108.3
2531	SPD 3	siCAV1	Tox+	siCAV 1 /+	5489.37
2532	SPD 3	siCAV1	Tox+	siCAV 1 /+	27583.2
2533	SPD 3	siCAV1	Tox+	siCAV 1 /+	3966.99
2534	SPD 3	siCAV1	Tox+	siCAV 1 /+	10335.2
2535	SPD 3	siCAV1	Tox+	siCAV 1 /+	5280.99
2536	SPD 3	siCAV1	Tox+	siCAV 1 /+	6312.4
2537	SPD 3	siCAV1	Tox+	siCAV 1 /+	11610.7
2538	SPD 3	siCAV1	Tox+	siCAV 1 /+	10848.3
2539	SPD 3	siCavin1	Tox-	siCavin 1/-	13001.2
2540	SPD 3	siCavin1	Tox-	siCavin 1/-	7766.87
2541	SPD 3	siCavin1	Tox-	siCavin 1/-	19940
2542	SPD 3	siCavin1	Tox-	siCavin 1/-	10868.2
2543	SPD 3	siCavin1	Tox-	siCavin 1/-	2924.35
2544	SPD 3	siCavin1	Tox-	siCavin 1/-	3054.8
2545	SPD 3	siCavin1	Tox-	siCavin 1/-	7104.73
2546	SPD 3	siCavin1	Tox-	siCavin 1/-	8574.48
2547	SPD 3	siCavin1	Tox-	siCavin 1/-	12933.5
2548	SPD 3	siCavin1	Tox-	siCavin 1/-	3892.22
2549	SPD 3	siCavin1	Tox-	siCavin 1/-	2716.02
2550	SPD 3	siCavin1	Tox-	siCavin 1/-	2694.97
2551	SPD 3	siCavin1	Tox-	siCavin 1/-	9615.73
2552	SPD 3	siCavin1	Tox-	siCavin 1/-	8127.84
2553	SPD 3	siCavin1	Tox-	siCavin 1/-	6022.39
2554	SPD 3	siCavin1	Tox-	siCavin 1/-	7167.77
2555	SPD 3	siCavin1	Tox-	siCavin 1/-	8454.06
2556	SPD 3	siCavin1	Tox-	siCavin 1/-	21646.9
2557	SPD 3	siCavin1	Tox-	siCavin 1/-	10618.4
2558	SPD 3	siCavin1	Tox-	siCavin 1/-	16766.8
2559	SPD 3	siCavin1	Tox-	siCavin 1/-	5392.6
2560	SPD 3	siCavin1	Tox-	siCavin 1/-	10923.5
2561	SPD 3	siCavin1	Tox-	siCavin 1/-	3787.52
2562	SPD 3	siCavin1	Tox-	siCavin 1/-	4461.26
2563	SPD 3	siCavin1	Tox-	siCavin 1/-	17565.9
2564	SPD 3	siCavin1	Tox-	siCavin 1/-	4982.29
2565	SPD 3	siCavin1	Tox-	siCavin 1/-	2785.65
2566	SPD 3	siCavin1	Tox-	siCavin 1/-	30894.7
2567	SPD 3	siCavin1	Tox-	siCavin 1/-	3669.43
2568	SPD 3	siCavin1	Tox-	siCavin 1/-	15099
2569	SPD 3	siCavin1	Tox-	siCavin 1/-	4036.24
2570	SPD 3	siCavin1	Tox-	siCavin 1/-	3045.85
2571	SPD 3	siCavin1	Tox-	siCavin 1/-	13754.3
2572	SPD 3	siCavin1	Tox-	siCavin 1/-	5593.44
2573	SPD 3	siCavin1	Tox-	siCavin 1/-	3332.56
2574	SPD 3	siCavin1	Tox-	siCavin 1/-	6483.31
2575	SPD 3	siCavin1	Tox-	siCavin 1/-	15301.9
2576	SPD 3	siCavin1	Tox-	siCavin 1/-	3268.07
2577	SPD 3	siCavin1	Tox-	siCavin 1/-	13011.5
2578	SPD 3	siCavin1	Tox-	siCavin 1/-	1566.65
2579	SPD 3	siCavin1	Tox-	siCavin 1/-	7724.57
2580	SPD 3	siCavin1	Tox-	siCavin 1/-	15307.8
2581	SPD 3	siCavin1	Tox-	siCavin 1/-	3418.18
2582	SPD 3	siCavin1	Tox-	siCavin 1/-	3412.02
2583	SPD 3	siCavin1	Tox-	siCavin 1/-	4605.22
2584	SPD 3	siCavin1	Tox-	siCavin 1/-	1566.02
2585	SPD 3	siCavin1	Tox-	siCavin 1/-	6399.41
2586	SPD 3	siCavin1	Tox-	siCavin 1/-	1415.28
2587	SPD 3	siCavin1	Tox-	siCavin 1/-	12274.5
2588	SPD 3	siCavin1	Tox-	siCavin 1/-	7501.03
2589	SPD 3	siCavin1	Tox-	siCavin 1/-	3923.86
2590	SPD 3	siCavin1	Tox-	siCavin 1/-	11603.6
2591	SPD 3	siCavin1	Tox-	siCavin 1/-	5822.63
2592	SPD 3	siCavin1	Tox-	siCavin 1/-	31335.5
2593	SPD 3	siCavin1	Tox-	siCavin 1/-	1638.89
2594	SPD 3	siCavin1	Tox-	siCavin 1/-	1864.08
2595	SPD 3	siCavin1	Tox-	siCavin 1/-	15850.2
2596	SPD 3	siCavin1	Tox-	siCavin 1/-	2249.46
2597	SPD 3	siCavin1	Tox-	siCavin 1/-	7393.79
2598	SPD 3	siCavin1	Tox-	siCavin 1/-	5475.23
2599	SPD 3	siCavin1	Tox-	siCavin 1/-	6304.85
2600	SPD 3	siCavin1	Tox-	siCavin 1/-	6587.06
2601	SPD 3	siCavin1	Tox-	siCavin 1/-	2154.28
2602	SPD 3	siCavin1	Tox-	siCavin 1/-	9951.71
2603	SPD 3	siCavin1	Tox-	siCavin 1/-	2492.8
2604	SPD 3	siCavin1	Tox-	siCavin 1/-	17264.9
2605	SPD 3	siCavin1	Tox-	siCavin 1/-	5335.21
2606	SPD 3	siCavin1	Tox-	siCavin 1/-	4072.2
2607	SPD 3	siCavin1	Tox-	siCavin 1/-	4234.61
2608	SPD 3	siCavin1	Tox-	siCavin 1/-	4015.25
2609	SPD 3	siCavin1	Tox-	siCavin 1/-	4371.97
2610	SPD 3	siCavin1	Tox-	siCavin 1/-	14067.5
2611	SPD 3	siCavin1	Tox-	siCavin 1/-	2582.47
2612	SPD 3	siCavin1	Tox-	siCavin 1/-	1632.99
2613	SPD 3	siCavin1	Tox-	siCavin 1/-	7033.32
2614	SPD 3	siCavin1	Tox-	siCavin 1/-	4926.3
2615	SPD 3	siCavin1	Tox-	siCavin 1/-	4913.61
2616	SPD 3	siCavin1	Tox-	siCavin 1/-	10365.9
2617	SPD 3	siCavin1	Tox-	siCavin 1/-	3592.45
2618	SPD 3	siCavin1	Tox-	siCavin 1/-	9279.17
2619	SPD 3	siCavin1	Tox-	siCavin 1/-	8125.43
2620	SPD 3	siCavin1	Tox-	siCavin 1/-	4840.68
2621	SPD 3	siCavin1	Tox-	siCavin 1/-	1916.46
2622	SPD 3	siCavin1	Tox-	siCavin 1/-	10166.5
2623	SPD 3	siCavin1	Tox-	siCavin 1/-	2776.21
2624	SPD 3	siCavin1	Tox-	siCavin 1/-	2307.17
2625	SPD 3	siCavin1	Tox-	siCavin 1/-	3456.29
2626	SPD 3	siCavin1	Tox-	siCavin 1/-	9687.52
2627	SPD 3	siCavin1	Tox-	siCavin 1/-	9350.96
2628	SPD 3	siCavin1	Tox-	siCavin 1/-	3722.07
2629	SPD 3	siCavin1	Tox-	siCavin 1/-	15111.3
2630	SPD 3	siCavin1	Tox-	siCavin 1/-	4474.96
2631	SPD 3	siCavin1	Tox-	siCavin 1/-	3257.73
2632	SPD 3	siCavin1	Tox-	siCavin 1/-	8485.89
2633	SPD 3	siCavin1	Tox-	siCavin 1/-	2316.56
2634	SPD 3	siCavin1	Tox-	siCavin 1/-	4607.82
2635	SPD 3	siCavin1	Tox-	siCavin 1/-	6991.85
2636	SPD 3	siCavin1	Tox-	siCavin 1/-	20556
2637	SPD 3	siCavin1	Tox-	siCavin 1/-	1929.34
2638	SPD 3	siCavin1	Tox-	siCavin 1/-	2282.19
2639	SPD 3	siCavin1	Tox-	siCavin 1/-	8505.8
2640	SPD 3	siCavin1	Tox-	siCavin 1/-	7695.72
2641	SPD 3	siCavin1	Tox-	siCavin 1/-	3920.76
2642	SPD 3	siCavin1	Tox-	siCavin 1/-	2380.1
2643	SPD 3	siCavin1	Tox-	siCavin 1/-	2101.51
2644	SPD 3	siCavin1	Tox-	siCavin 1/-	1363.4
2645	SPD 3	siCavin1	Tox-	siCavin 1/-	8994.43
2646	SPD 3	siCavin1	Tox-	siCavin 1/-	2405.09
2647	SPD 3	siCavin1	Tox-	siCavin 1/-	6023.54
2648	SPD 3	siCavin1	Tox-	siCavin 1/-	3158.29
2649	SPD 3	siCavin1	Tox-	siCavin 1/-	5891.44
2650	SPD 3	siCavin1	Tox-	siCavin 1/-	10170
2651	SPD 3	siCavin1	Tox-	siCavin 1/-	4658.1
2652	SPD 3	siCavin1	Tox-	siCavin 1/-	10135.1
2653	SPD 3	siCavin1	Tox-	siCavin 1/-	11066.5
2654	SPD 3	siCavin1	Tox-	siCavin 1/-	4379.96
2655	SPD 3	siCavin1	Tox-	siCavin 1/-	4841.7
2656	SPD 3	siCavin1	Tox-	siCavin 1/-	3037.1
2657	SPD 3	siCavin1	Tox-	siCavin 1/-	5606.95
2658	SPD 3	siCavin1	Tox-	siCavin 1/-	3139.52
2659	SPD 3	siCavin1	Tox-	siCavin 1/-	4022.6
2660	SPD 3	siCavin1	Tox-	siCavin 1/-	5424.63
2661	SPD 3	siCavin1	Tox-	siCavin 1/-	9343.48
2662	SPD 3	siCavin1	Tox-	siCavin 1/-	2966.01
2663	SPD 3	siCavin1	Tox-	siCavin 1/-	12852.3
2664	SPD 3	siCavin1	Tox-	siCavin 1/-	8521.09
2665	SPD 3	siCavin1	Tox-	siCavin 1/-	4116.21
2666	SPD 3	siCavin1	Tox-	siCavin 1/-	1908.41
2667	SPD 3	siCavin1	Tox-	siCavin 1/-	10490.8
2668	SPD 3	siCavin1	Tox-	siCavin 1/-	5178.95
2669	SPD 3	siCavin1	Tox-	siCavin 1/-	3256.65
2670	SPD 3	siCavin1	Tox-	siCavin 1/-	3009.96
2671	SPD 3	siCavin1	Tox-	siCavin 1/-	19071.1
2672	SPD 3	siCavin1	Tox-	siCavin 1/-	1777.13
2673	SPD 3	siCavin1	Tox-	siCavin 1/-	2262.91
2674	SPD 3	siCavin1	Tox-	siCavin 1/-	3421.73
2675	SPD 3	siCavin1	Tox-	siCavin 1/-	5060.8
2676	SPD 3	siCavin1	Tox-	siCavin 1/-	5252.64
2677	SPD 3	siCavin1	Tox-	siCavin 1/-	3502.14
2678	SPD 3	siCavin1	Tox-	siCavin 1/-	3717.76
2679	SPD 3	siCavin1	Tox-	siCavin 1/-	7636.23
2680	SPD 3	siCavin1	Tox-	siCavin 1/-	7557.91
2681	SPD 3	siCavin1	Tox-	siCavin 1/-	5257.27
2682	SPD 3	siCavin1	Tox-	siCavin 1/-	5638.66
2683	SPD 3	siCavin1	Tox-	siCavin 1/-	5697.38
2684	SPD 3	siCavin1	Tox-	siCavin 1/-	6001.66
2685	SPD 3	siCavin1	Tox-	siCavin 1/-	14413.4
2686	SPD 3	siCavin1	Tox-	siCavin 1/-	13834.3
2687	SPD 3	siCavin1	Tox-	siCavin 1/-	1547.69
2688	SPD 3	siCavin1	Tox-	siCavin 1/-	21496.6
2689	SPD 3	siCavin1	Tox-	siCavin 1/-	2033.59
2690	SPD 3	siCavin1	Tox-	siCavin 1/-	5264.12
2691	SPD 3	siCavin1	Tox-	siCavin 1/-	26780.7
2692	SPD 3	siCavin1	Tox-	siCavin 1/-	4976.2
2693	SPD 3	siCavin1	Tox+	siCavin 1/+	14417.1
2694	SPD 3	siCavin1	Tox+	siCavin 1/+	4119.57
2695	SPD 3	siCavin1	Tox+	siCavin 1/+	7823.75
2696	SPD 3	siCavin1	Tox+	siCavin 1/+	3314.74
2697	SPD 3	siCavin1	Tox+	siCavin 1/+	10786.7
2698	SPD 3	siCavin1	Tox+	siCavin 1/+	14156.5
2699	SPD 3	siCavin1	Tox+	siCavin 1/+	5884.59
2700	SPD 3	siCavin1	Tox+	siCavin 1/+	26091.5
2701	SPD 3	siCavin1	Tox+	siCavin 1/+	11192.8
2702	SPD 3	siCavin1	Tox+	siCavin 1/+	3240.86
2703	SPD 3	siCavin1	Tox+	siCavin 1/+	2311.93
2704	SPD 3	siCavin1	Tox+	siCavin 1/+	10496
2705	SPD 3	siCavin1	Tox+	siCavin 1/+	2710.7
2706	SPD 3	siCavin1	Tox+	siCavin 1/+	6230.4
2707	SPD 3	siCavin1	Tox+	siCavin 1/+	12598.7
2708	SPD 3	siCavin1	Tox+	siCavin 1/+	10898.5
2709	SPD 3	siCavin1	Tox+	siCavin 1/+	7644.28
2710	SPD 3	siCavin1	Tox+	siCavin 1/+	10760.1
2711	SPD 3	siCavin1	Tox+	siCavin 1/+	5680.51
2712	SPD 3	siCavin1	Tox+	siCavin 1/+	4511.93
2713	SPD 3	siCavin1	Tox+	siCavin 1/+	9179.61
2714	SPD 3	siCavin1	Tox+	siCavin 1/+	15546.2
2715	SPD 3	siCavin1	Tox+	siCavin 1/+	20474.8
2716	SPD 3	siCavin1	Tox+	siCavin 1/+	3626.44
2717	SPD 3	siCavin1	Tox+	siCavin 1/+	14480
2718	SPD 3	siCavin1	Tox+	siCavin 1/+	5149.59
2719	SPD 3	siCavin1	Tox+	siCavin 1/+	5835.63
2720	SPD 3	siCavin1	Tox+	siCavin 1/+	5083.38
2721	SPD 3	siCavin1	Tox+	siCavin 1/+	6334.79
2722	SPD 3	siCavin1	Tox+	siCavin 1/+	5625.72
2723	SPD 3	siCavin1	Tox+	siCavin 1/+	11301.7
2724	SPD 3	siCavin1	Tox+	siCavin 1/+	4487.26
2725	SPD 3	siCavin1	Tox+	siCavin 1/+	3044.02
2726	SPD 3	siCavin1	Tox+	siCavin 1/+	7326.76
2727	SPD 3	siCavin1	Tox+	siCavin 1/+	13692
2728	SPD 3	siCavin1	Tox+	siCavin 1/+	1701.92
2729	SPD 3	siCavin1	Tox+	siCavin 1/+	15652.5
2730	SPD 3	siCavin1	Tox+	siCavin 1/+	14164.4
2731	SPD 3	siCavin1	Tox+	siCavin 1/+	4399.24
2732	SPD 3	siCavin1	Tox+	siCavin 1/+	9323
2733	SPD 3	siCavin1	Tox+	siCavin 1/+	3308.53
2734	SPD 3	siCavin1	Tox+	siCavin 1/+	2705.31
2735	SPD 3	siCavin1	Tox+	siCavin 1/+	6227.1
2736	SPD 3	siCavin1	Tox+	siCavin 1/+	4806.12
2737	SPD 3	siCavin1	Tox+	siCavin 1/+	12081.3
2738	SPD 3	siCavin1	Tox+	siCavin 1/+	3473.35
2739	SPD 3	siCavin1	Tox+	siCavin 1/+	11573.3
2740	SPD 3	siCavin1	Tox+	siCavin 1/+	6060.95
2741	SPD 3	siCavin1	Tox+	siCavin 1/+	27645.8
2742	SPD 3	siCavin1	Tox+	siCavin 1/+	4322.57
2743	SPD 3	siCavin1	Tox+	siCavin 1/+	8083.13
2744	SPD 3	siCavin1	Tox+	siCavin 1/+	3928.68
2745	SPD 3	siCavin1	Tox+	siCavin 1/+	2465.21
2746	SPD 3	siCavin1	Tox+	siCavin 1/+	32772.1
2747	SPD 3	siCavin1	Tox+	siCavin 1/+	4816.77
2748	SPD 3	siCavin1	Tox+	siCavin 1/+	6033.68
2749	SPD 3	siCavin1	Tox+	siCavin 1/+	26477.7
2750	SPD 3	siCavin1	Tox+	siCavin 1/+	5769.61
2751	SPD 3	siCavin1	Tox+	siCavin 1/+	21617.8
2752	SPD 3	siCavin1	Tox+	siCavin 1/+	10449.6
2753	SPD 3	siCavin1	Tox+	siCavin 1/+	2798.91
2754	SPD 3	siCavin1	Tox+	siCavin 1/+	3071.54
2755	SPD 3	siCavin1	Tox+	siCavin 1/+	6074.33
2756	SPD 3	siCavin1	Tox+	siCavin 1/+	7205.57
2757	SPD 3	siCavin1	Tox+	siCavin 1/+	6878.46
2758	SPD 3	siCavin1	Tox+	siCavin 1/+	5111.16
2759	SPD 3	siCavin1	Tox+	siCavin 1/+	4954.01
2760	SPD 3	siCavin1	Tox+	siCavin 1/+	15208.1
2761	SPD 3	siCavin1	Tox+	siCavin 1/+	9513.12
2762	SPD 3	siCavin1	Tox+	siCavin 1/+	16828.1
2763	SPD 3	siCavin1	Tox+	siCavin 1/+	4268.09
2764	SPD 3	siCavin1	Tox+	siCavin 1/+	11437.4
2765	SPD 3	siCavin1	Tox+	siCavin 1/+	3899.83
2766	SPD 3	siCavin1	Tox+	siCavin 1/+	2736.57
2767	SPD 3	siCavin1	Tox+	siCavin 1/+	2093.08
2768	SPD 3	siCavin1	Tox+	siCavin 1/+	5036.26
2769	SPD 3	siCavin1	Tox+	siCavin 1/+	4575.09
2770	SPD 3	siCavin1	Tox+	siCavin 1/+	8164.68
2771	SPD 3	siCavin1	Tox+	siCavin 1/+	3007.11
2772	SPD 3	siCavin1	Tox+	siCavin 1/+	18018.1
2773	SPD 3	siCavin1	Tox+	siCavin 1/+	9460.74
2774	SPD 3	siCavin1	Tox+	siCavin 1/+	13444.8
2775	SPD 3	siCavin1	Tox+	siCavin 1/+	8508.78
2776	SPD 3	siCavin1	Tox+	siCavin 1/+	27632.9
2777	SPD 3	siCavin1	Tox+	siCavin 1/+	5559.77
2778	SPD 3	siCavin1	Tox+	siCavin 1/+	4777.01
2779	SPD 3	siCavin1	Tox+	siCavin 1/+	8481.01
2780	SPD 3	siCavin1	Tox+	siCavin 1/+	10706.4
2781	SPD 3	siCavin1	Tox+	siCavin 1/+	7665.34
2782	SPD 3	siCavin1	Tox+	siCavin 1/+	10878.8
2783	SPD 3	siCavin1	Tox+	siCavin 1/+	6932.24
2784	SPD 3	siCavin1	Tox+	siCavin 1/+	17818.7
2785	SPD 3	siCavin1	Tox+	siCavin 1/+	17217.8
2786	SPD 3	siCavin1	Tox+	siCavin 1/+	15739.7
2787	SPD 3	siCavin1	Tox+	siCavin 1/+	4821.02
2788	SPD 3	siCavin1	Tox+	siCavin 1/+	4668.25
2789	SPD 3	siCavin1	Tox+	siCavin 1/+	4662.86
2790	SPD 3	siCavin1	Tox+	siCavin 1/+	4076.13
2791	SPD 3	siCavin1	Tox+	siCavin 1/+	16433.7
2792	SPD 3	siCavin1	Tox+	siCavin 1/+	8673.48
2793	SPD 3	siCavin1	Tox+	siCavin 1/+	20073.9
2794	SPD 3	siCavin1	Tox+	siCavin 1/+	13332.8
2795	SPD 3	siCavin1	Tox+	siCavin 1/+	4677.07
2796	SPD 3	siCavin1	Tox+	siCavin 1/+	3832.1
2797	SPD 3	siCavin1	Tox+	siCavin 1/+	3287.35
2798	SPD 3	siCavin1	Tox+	siCavin 1/+	5142.55
2799	SPD 3	siCavin1	Tox+	siCavin 1/+	4173.41
2800	SPD 3	siCavin1	Tox+	siCavin 1/+	3136.6
2801	SPD 3	siCavin1	Tox+	siCavin 1/+	8195.38
2802	SPD 3	siCavin1	Tox+	siCavin 1/+	2366.02
2803	SPD 3	siCavin1	Tox+	siCavin 1/+	13799.5
2804	SPD 3	siCavin1	Tox+	siCavin 1/+	19319
2805	SPD 3	siCavin1	Tox+	siCavin 1/+	7960.16
2806	SPD 3	siCavin1	Tox+	siCavin 1/+	5243.06
2807	SPD 3	siCavin1	Tox+	siCavin 1/+	7284.33
2808	SPD 3	siCavin1	Tox+	siCavin 1/+	6257.61
2809	SPD 3	siCTRL	Tox-	siCT/ -	5920.42
2810	SPD 3	siCTRL	Tox-	siCT/ -	1959.52
2811	SPD 3	siCTRL	Tox-	siCT/ -	2317.51
2812	SPD 3	siCTRL	Tox-	siCT/ -	1912.97
2813	SPD 3	siCTRL	Tox-	siCT/ -	2739.17
2814	SPD 3	siCTRL	Tox-	siCT/ -	2665.92
2815	SPD 3	siCTRL	Tox-	siCT/ -	3475.95
2816	SPD 3	siCTRL	Tox-	siCT/ -	2029.41
2817	SPD 3	siCTRL	Tox-	siCT/ -	8534.6
2818	SPD 3	siCTRL	Tox-	siCT/ -	2623.12
2819	SPD 3	siCTRL	Tox-	siCT/ -	14328
2820	SPD 3	siCTRL	Tox-	siCT/ -	4363.47
2821	SPD 3	siCTRL	Tox-	siCT/ -	33336.8
2822	SPD 3	siCTRL	Tox-	siCT/ -	5989.8
2823	SPD 3	siCTRL	Tox-	siCT/ -	2352.33
2824	SPD 3	siCTRL	Tox-	siCT/ -	23843.5
2825	SPD 3	siCTRL	Tox-	siCT/ -	2898.6
2826	SPD 3	siCTRL	Tox-	siCT/ -	10616.6
2827	SPD 3	siCTRL	Tox-	siCT/ -	6230.4
2828	SPD 3	siCTRL	Tox-	siCT/ -	2803.09
2829	SPD 3	siCTRL	Tox-	siCT/ -	2662.06
2830	SPD 3	siCTRL	Tox-	siCT/ -	21305.2
2831	SPD 3	siCTRL	Tox-	siCT/ -	4304.36
2832	SPD 3	siCTRL	Tox-	siCT/ -	5478.59
2833	SPD 3	siCTRL	Tox-	siCT/ -	4473.5
2834	SPD 3	siCTRL	Tox-	siCT/ -	2375.54
2835	SPD 3	siCTRL	Tox-	siCT/ -	3660.62
2836	SPD 3	siCTRL	Tox-	siCT/ -	4261.56
2837	SPD 3	siCTRL	Tox-	siCT/ -	2899.36
2838	SPD 3	siCTRL	Tox-	siCT/ -	1876.76
2839	SPD 3	siCTRL	Tox-	siCT/ -	6403.91
2840	SPD 3	siCTRL	Tox-	siCT/ -	8320.44
2841	SPD 3	siCTRL	Tox-	siCT/ -	4288.32
2842	SPD 3	siCTRL	Tox-	siCT/ -	1318.82
2843	SPD 3	siCTRL	Tox-	siCT/ -	19613.3
2844	SPD 3	siCTRL	Tox-	siCT/ -	6931.6
2845	SPD 3	siCTRL	Tox-	siCT/ -	5200.76
2846	SPD 3	siCTRL	Tox-	siCT/ -	11776.9
2847	SPD 3	siCTRL	Tox-	siCT/ -	1474.25
2848	SPD 3	siCTRL	Tox-	siCT/ -	3499.98
2849	SPD 3	siCTRL	Tox-	siCT/ -	1376.4
2850	SPD 3	siCTRL	Tox-	siCT/ -	11658.3
2851	SPD 3	siCTRL	Tox-	siCT/ -	13159.8
2852	SPD 3	siCTRL	Tox-	siCT/ -	6040.21
2853	SPD 3	siCTRL	Tox-	siCT/ -	5026.62
2854	SPD 3	siCTRL	Tox-	siCT/ -	2354.8
2855	SPD 3	siCTRL	Tox-	siCT/ -	2603.9
2856	SPD 3	siCTRL	Tox-	siCT/ -	3628.09
2857	SPD 3	siCTRL	Tox-	siCT/ -	4905.75
2858	SPD 3	siCTRL	Tox-	siCT/ -	2251.37
2859	SPD 3	siCTRL	Tox-	siCT/ -	2345.54
2860	SPD 3	siCTRL	Tox-	siCT/ -	10462.6
2861	SPD 3	siCTRL	Tox-	siCT/ -	1044.03
2862	SPD 3	siCTRL	Tox-	siCT/ -	3121.7
2863	SPD 3	siCTRL	Tox-	siCT/ -	2197.02
2864	SPD 3	siCTRL	Tox-	siCT/ -	2468.13
2865	SPD 3	siCTRL	Tox-	siCT/ -	13585.5
2866	SPD 3	siCTRL	Tox-	siCT/ -	1750.94
2867	SPD 3	siCTRL	Tox-	siCT/ -	6915.75
2868	SPD 3	siCTRL	Tox-	siCT/ -	1171.44
2869	SPD 3	siCTRL	Tox-	siCT/ -	1350.27
2870	SPD 3	siCTRL	Tox-	siCT/ -	2336.09
2871	SPD 3	siCTRL	Tox-	siCT/ -	1716.25
2872	SPD 3	siCTRL	Tox-	siCT/ -	4318.19
2873	SPD 3	siCTRL	Tox-	siCT/ -	2136.58
2874	SPD 3	siCTRL	Tox-	siCT/ -	2015.14
2875	SPD 3	siCTRL	Tox-	siCT/ -	11016.2
2876	SPD 3	siCTRL	Tox-	siCT/ -	4218.05
2877	SPD 3	siCTRL	Tox-	siCT/ -	7901.76
2878	SPD 3	siCTRL	Tox-	siCT/ -	2651.84
2879	SPD 3	siCTRL	Tox-	siCT/ -	2418.79
2880	SPD 3	siCTRL	Tox-	siCT/ -	6891.97
2881	SPD 3	siCTRL	Tox-	siCT/ -	7121.16
2882	SPD 3	siCTRL	Tox-	siCT/ -	3317.72
2883	SPD 3	siCTRL	Tox-	siCT/ -	2269.5
2884	SPD 3	siCTRL	Tox-	siCT/ -	4910.12
2885	SPD 3	siCTRL	Tox-	siCT/ -	2432.8
2886	SPD 3	siCTRL	Tox-	siCT/ -	5183.45
2887	SPD 3	siCTRL	Tox-	siCT/ -	3592
2888	SPD 3	siCTRL	Tox-	siCT/ -	4792.42
2889	SPD 3	siCTRL	Tox-	siCT/ -	1963.26
2890	SPD 3	siCTRL	Tox-	siCT/ -	2955.1
2891	SPD 3	siCTRL	Tox-	siCT/ -	6756.89
2892	SPD 3	siCTRL	Tox-	siCT/ -	8889.92
2893	SPD 3	siCTRL	Tox-	siCT/ -	2581.83
2894	SPD 3	siCTRL	Tox-	siCT/ -	4627.16
2895	SPD 3	siCTRL	Tox-	siCT/ -	4503.43
2896	SPD 3	siCTRL	Tox-	siCT/ -	1980.32
2897	SPD 3	siCTRL	Tox-	siCT/ -	4696.92
2898	SPD 3	siCTRL	Tox-	siCT/ -	16580.8
2899	SPD 3	siCTRL	Tox-	siCT/ -	11160.4
2900	SPD 3	siCTRL	Tox-	siCT/ -	17126.9
2901	SPD 3	siCTRL	Tox-	siCT/ -	1487.76
2902	SPD 3	siCTRL	Tox-	siCT/ -	3763.23
2903	SPD 3	siCTRL	Tox-	siCT/ -	6701.72
2904	SPD 3	siCTRL	Tox-	siCT/ -	1958.13
2905	SPD 3	siCTRL	Tox-	siCT/ -	6752.2
2906	SPD 3	siCTRL	Tox-	siCT/ -	5601.31
2907	SPD 3	siCTRL	Tox-	siCT/ -	2020.78
2908	SPD 3	siCTRL	Tox-	siCT/ -	4900.8
2909	SPD 3	siCTRL	Tox-	siCT/ -	12430
2910	SPD 3	siCTRL	Tox-	siCT/ -	3702.47
2911	SPD 3	siCTRL	Tox-	siCT/ -	3555.47
2912	SPD 3	siCTRL	Tox-	siCT/ -	5138.36
2913	SPD 3	siCTRL	Tox-	siCT/ -	6127.73
2914	SPD 3	siCTRL	Tox-	siCT/ -	3225.26
2915	SPD 3	siCTRL	Tox-	siCT/ -	3998.44
2916	SPD 3	siCTRL	Tox-	siCT/ -	3825.82
2917	SPD 3	siCTRL	Tox-	siCT/ -	1759.31
2918	SPD 3	siCTRL	Tox-	siCT/ -	11535.5
2919	SPD 3	siCTRL	Tox-	siCT/ -	21861.5
2920	SPD 3	siCTRL	Tox-	siCT/ -	3942.13
2921	SPD 3	siCTRL	Tox-	siCT/ -	6450.21
2922	SPD 3	siCTRL	Tox-	siCT/ -	1707.12
2923	SPD 3	siCTRL	Tox-	siCT/ -	3265.09
2924	SPD 3	siCTRL	Tox-	siCT/ -	3138.82
2925	SPD 3	siCTRL	Tox-	siCT/ -	10216.1
2926	SPD 3	siCTRL	Tox-	siCT/ -	3877.12
2927	SPD 3	siCTRL	Tox-	siCT/ -	2011.02
2928	SPD 3	siCTRL	Tox-	siCT/ -	11903.6
2929	SPD 3	siCTRL	Tox-	siCT/ -	7055.14
2930	SPD 3	siCTRL	Tox-	siCT/ -	2458.3
2931	SPD 3	siCTRL	Tox-	siCT/ -	6328.89
2932	SPD 3	siCTRL	Tox-	siCT/ -	2922.32
2933	SPD 3	siCTRL	Tox-	siCT/ -	7566.66
2934	SPD 3	siCTRL	Tox-	siCT/ -	3628.59
2935	SPD 3	siCTRL	Tox-	siCT/ -	3655.99
2936	SPD 3	siCTRL	Tox-	siCT/ -	5842.04
2937	SPD 3	siCTRL	Tox-	siCT/ -	1710.93
2938	SPD 3	siCTRL	Tox-	siCT/ -	5083.38
2939	SPD 3	siCTRL	Tox-	siCT/ -	4704.21
2940	SPD 3	siCTRL	Tox-	siCT/ -	3646.98
2941	SPD 3	siCTRL	Tox-	siCT/ -	16977.4
2942	SPD 3	siCTRL	Tox-	siCT/ -	2923.14
2943	SPD 3	siCTRL	Tox-	siCT/ -	3516.28
2944	SPD 3	siCTRL	Tox-	siCT/ -	9719.54
2945	SPD 3	siCTRL	Tox-	siCT/ -	6932.68
2946	SPD 3	siCTRL	Tox-	siCT/ -	6452.68
2947	SPD 3	siCTRL	Tox-	siCT/ -	3316.14
2948	SPD 3	siCTRL	Tox-	siCT/ -	2482.97
2949	SPD 3	siCTRL	Tox-	siCT/ -	6471.45
2950	SPD 3	siCTRL	Tox-	siCT/ -	5214.27
2951	SPD 3	siCTRL	Tox-	siCT/ -	3702.85
2952	SPD 3	siCTRL	Tox-	siCT/ -	12435.9
2953	SPD 3	siCTRL	Tox-	siCT/ -	12311.1
2954	SPD 3	siCTRL	Tox-	siCT/ -	2428.17
2955	SPD 3	siCTRL	Tox-	siCT/ -	7786.53
2956	SPD 3	siCTRL	Tox-	siCT/ -	2392.03
2957	SPD 3	siCTRL	Tox-	siCT/ -	2168.29
2958	SPD 3	siCTRL	Tox-	siCT/ -	1359.47
2959	SPD 3	siCTRL	Tox-	siCT/ -	4106.63
2960	SPD 3	siCTRL	Tox-	siCT/ -	3055.43
2961	SPD 3	siCTRL	Tox-	siCT/ -	11130.8
2962	SPD 3	siCTRL	Tox-	siCT/ -	6496.31
2963	SPD 3	siCTRL	Tox-	siCT/ -	2433.88
2964	SPD 3	siCTRL	Tox-	siCT/ -	9736.85
2965	SPD 3	siCTRL	Tox-	siCT/ -	4539.01
2966	SPD 3	siCTRL	Tox-	siCT/ -	1996.94
2967	SPD 3	siCTRL	Tox-	siCT/ -	5876.66
2968	SPD 3	siCTRL	Tox-	siCT/ -	4191.04
2969	SPD 3	siCTRL	Tox-	siCT/ -	2711.9
2970	SPD 3	siCTRL	Tox-	siCT/ -	2040.82
2971	SPD 3	siCTRL	Tox-	siCT/ -	2332.22
2972	SPD 3	siCTRL	Tox-	siCT/ -	2023.07
2973	SPD 3	siCTRL	Tox-	siCT/ -	7103.21
2974	SPD 3	siCTRL	Tox-	siCT/ -	6278.47
2975	SPD 3	siCTRL	Tox-	siCT/ -	3101.79
2976	SPD 3	siCTRL	Tox-	siCT/ -	4255.91
2977	SPD 3	siCTRL	Tox-	siCT/ -	1779.92
2978	SPD 3	siCTRL	Tox-	siCT/ -	2766.82
2979	SPD 3	siCTRL	Tox-	siCT/ -	8727.83
2980	SPD 3	siCTRL	Tox-	siCT/ -	10211.5
2981	SPD 3	siCTRL	Tox-	siCT/ -	9357.87
2982	SPD 3	siCTRL	Tox-	siCT/ -	2633.07
2983	SPD 3	siCTRL	Tox-	siCT/ -	20730.6
2984	SPD 3	siCTRL	Tox-	siCT/ -	13436.9
2985	SPD 3	siCTRL	Tox-	siCT/ -	8442.13
2986	SPD 3	siCTRL	Tox-	siCT/ -	3244.86
2987	SPD 3	siCTRL	Tox-	siCT/ -	2684.38
2988	SPD 3	siCTRL	Tox-	siCT/ -	3904.96
2989	SPD 3	siCTRL	Tox-	siCT/ -	9021.26
2990	SPD 3	siCTRL	Tox-	siCT/ -	2124.15
2991	SPD 3	siCTRL	Tox-	siCT/ -	18530.9
2992	SPD 3	siCTRL	Tox-	siCT/ -	27316.2
2993	SPD 3	siCTRL	Tox-	siCT/ -	9572.16
2994	SPD 3	siCTRL	Tox-	siCT/ -	3876.11
2995	SPD 3	siCTRL	Tox-	siCT/ -	3927.35
2996	SPD 3	siCTRL	Tox-	siCT/ -	2087.05
2997	SPD 3	siCTRL	Tox-	siCT/ -	2830.93
2998	SPD 3	siCTRL	Tox-	siCT/ -	2357.91
2999	SPD 3	siCTRL	Tox-	siCT/ -	3856.58
3000	SPD 3	siCTRL	Tox-	siCT/ -	2139.82
3001	SPD 3	siCTRL	Tox+	siCT/ +	13408.6
3002	SPD 3	siCTRL	Tox+	siCT/ +	21216.1
3003	SPD 3	siCTRL	Tox+	siCT/ +	4907.52
3004	SPD 3	siCTRL	Tox+	siCT/ +	21391
3005	SPD 3	siCTRL	Tox+	siCT/ +	4743.84
3006	SPD 3	siCTRL	Tox+	siCT/ +	8667.71
3007	SPD 3	siCTRL	Tox+	siCT/ +	9108.39
3008	SPD 3	siCTRL	Tox+	siCT/ +	3644.76
3009	SPD 3	siCTRL	Tox+	siCT/ +	11215.6
3010	SPD 3	siCTRL	Tox+	siCT/ +	12929
3011	SPD 3	siCTRL	Tox+	siCT/ +	11592
3012	SPD 3	siCTRL	Tox+	siCT/ +	6836.03
3013	SPD 3	siCTRL	Tox+	siCT/ +	16226.9
3014	SPD 3	siCTRL	Tox+	siCT/ +	10364.2
3015	SPD 3	siCTRL	Tox+	siCT/ +	5205.08
3016	SPD 3	siCTRL	Tox+	siCT/ +	4397.9
3017	SPD 3	siCTRL	Tox+	siCT/ +	4645.87
3018	SPD 3	siCTRL	Tox+	siCT/ +	5601.37
3019	SPD 3	siCTRL	Tox+	siCT/ +	4581.81
3020	SPD 3	siCTRL	Tox+	siCT/ +	2931.64
3021	SPD 3	siCTRL	Tox+	siCT/ +	7328.91
3022	SPD 3	siCTRL	Tox+	siCT/ +	3191.08
3023	SPD 3	siCTRL	Tox+	siCT/ +	12355.1
3024	SPD 3	siCTRL	Tox+	siCT/ +	2871.14
3025	SPD 3	siCTRL	Tox+	siCT/ +	22795.7
3026	SPD 3	siCTRL	Tox+	siCT/ +	3030.32
3027	SPD 3	siCTRL	Tox+	siCT/ +	3852.65
3028	SPD 3	siCTRL	Tox+	siCT/ +	8601.63
3029	SPD 3	siCTRL	Tox+	siCT/ +	4383.32
3030	SPD 3	siCTRL	Tox+	siCT/ +	14138.2
3031	SPD 3	siCTRL	Tox+	siCT/ +	7920.72
3032	SPD 3	siCTRL	Tox+	siCT/ +	7208.55
3033	SPD 3	siCTRL	Tox+	siCT/ +	7910.76
3034	SPD 3	siCTRL	Tox+	siCT/ +	4432.15
3035	SPD 3	siCTRL	Tox+	siCT/ +	3012.62
3036	SPD 3	siCTRL	Tox+	siCT/ +	3727.02
3037	SPD 3	siCTRL	Tox+	siCT/ +	10296.6
3038	SPD 3	siCTRL	Tox+	siCT/ +	3693.53
3039	SPD 3	siCTRL	Tox+	siCT/ +	9075.35
3040	SPD 3	siCTRL	Tox+	siCT/ +	4681.95
3041	SPD 3	siCTRL	Tox+	siCT/ +	2767.9
3042	SPD 3	siCTRL	Tox+	siCT/ +	7712.08
3043	SPD 3	siCTRL	Tox+	siCT/ +	17199.8
3044	SPD 3	siCTRL	Tox+	siCT/ +	2445.93
3045	SPD 3	siCTRL	Tox+	siCT/ +	2762.44
3046	SPD 3	siCTRL	Tox+	siCT/ +	2032.01
3047	SPD 3	siCTRL	Tox+	siCT/ +	4309.44
3048	SPD 3	siCTRL	Tox+	siCT/ +	4343.11
3049	SPD 3	siCTRL	Tox+	siCT/ +	8072.41
3050	SPD 3	siCTRL	Tox+	siCT/ +	12461.1
3051	SPD 3	siCTRL	Tox+	siCT/ +	4011.89
3052	SPD 3	siCTRL	Tox+	siCT/ +	11163.5
3053	SPD 3	siCTRL	Tox+	siCT/ +	16649.9
3054	SPD 3	siCTRL	Tox+	siCT/ +	2984.59
3055	SPD 3	siCTRL	Tox+	siCT/ +	4221.54
3056	SPD 3	siCTRL	Tox+	siCT/ +	24072.1
3057	SPD 3	siCTRL	Tox+	siCT/ +	2635.17
3058	SPD 3	siCTRL	Tox+	siCT/ +	9069.01
3059	SPD 3	siCTRL	Tox+	siCT/ +	3027.72
3060	SPD 3	siCTRL	Tox+	siCT/ +	4601.09
3061	SPD 3	siCTRL	Tox+	siCT/ +	13141
3062	SPD 3	siCTRL	Tox+	siCT/ +	15739.2
3063	SPD 3	siCTRL	Tox+	siCT/ +	11940.8
3064	SPD 3	siCTRL	Tox+	siCT/ +	5824.91
3065	SPD 3	siCTRL	Tox+	siCT/ +	15262.3
3066	SPD 3	siCTRL	Tox+	siCT/ +	2770.56
3067	SPD 3	siCTRL	Tox+	siCT/ +	7336.39
3068	SPD 3	siCTRL	Tox+	siCT/ +	6595.37
3069	SPD 3	siCTRL	Tox+	siCT/ +	14690.4
3070	SPD 3	siCTRL	Tox+	siCT/ +	2564.52
3071	SPD 3	siCTRL	Tox+	siCT/ +	2995.95
3072	SPD 3	siCTRL	Tox+	siCT/ +	41944.9
3073	SPD 3	siCTRL	Tox+	siCT/ +	26263.1
3074	SPD 3	siCTRL	Tox+	siCT/ +	3095.7
3075	SPD 3	siCTRL	Tox+	siCT/ +	12896.7
3076	SPD 3	siCTRL	Tox+	siCT/ +	9634.37
3077	SPD 3	siCTRL	Tox+	siCT/ +	3070.9
3078	SPD 3	siCTRL	Tox+	siCT/ +	3114.28
3079	SPD 3	siCTRL	Tox+	siCT/ +	18810
3080	SPD 3	siCTRL	Tox+	siCT/ +	6541.78
3081	SPD 3	siCTRL	Tox+	siCT/ +	9148.22
3082	SPD 3	siCTRL	Tox+	siCT/ +	5405.22
3083	SPD 3	siCTRL	Tox+	siCT/ +	4966.31
3084	SPD 3	siCTRL	Tox+	siCT/ +	2829.79
3085	SPD 3	siCTRL	Tox+	siCT/ +	3221.39
3086	SPD 3	siCTRL	Tox+	siCT/ +	12239
3087	SPD 3	siCTRL	Tox+	siCT/ +	12834.8
3088	SPD 3	siCTRL	Tox+	siCT/ +	8072.98
3089	SPD 3	siCTRL	Tox+	siCT/ +	11049
3090	SPD 3	siCTRL	Tox+	siCT/ +	3755.49
3091	SPD 3	siCTRL	Tox+	siCT/ +	11982.3
3092	SPD 3	siCTRL	Tox+	siCT/ +	9762.35
3093	SPD 3	siCTRL	Tox+	siCT/ +	1411.6
3094	SPD 3	siCTRL	Tox+	siCT/ +	4699.33
3095	SPD 3	siCTRL	Tox+	siCT/ +	7114.69
3096	SPD 3	siCTRL	Tox+	siCT/ +	8208.19
3097	SPD 3	siCTRL	Tox+	siCT/ +	2727.12
3098	SPD 3	siCTRL	Tox+	siCT/ +	4557.97
3099	SPD 3	siCTRL	Tox+	siCT/ +	2472.57
3100	SPD 3	siCTRL	Tox+	siCT/ +	10540.8
3101	SPD 3	siCTRL	Tox+	siCT/ +	8550.01
3102	SPD 3	siCTRL	Tox+	siCT/ +	6411.46
3103	SPD 3	siCTRL	Tox+	siCT/ +	1657.85
3104	SPD 3	siCTRL	Tox+	siCT/ +	4782.34
3105	SPD 3	siCTRL	Tox+	siCT/ +	7837.2
3106	SPD 3	siCTRL	Tox+	siCT/ +	13479.7
3107	SPD 3	siCTRL	Tox+	siCT/ +	2054.9
3108	SPD 3	siCTRL	Tox+	siCT/ +	11746.5
3109	SPD 3	siCTRL	Tox+	siCT/ +	10334.9
3110	SPD 3	siCTRL	Tox+	siCT/ +	19245.2
3111	SPD 3	siCTRL	Tox+	siCT/ +	7839.86
3112	SPD 3	siCTRL	Tox+	siCT/ +	2005.56
3113	SPD 3	siCTRL	Tox+	siCT/ +	2317.7
3114	SPD 3	siCTRL	Tox+	siCT/ +	2984.66
3115	SPD 3	siCTRL	Tox+	siCT/ +	3632.34
3116	SPD 3	siCTRL	Tox+	siCT/ +	1559.11
3117	SPD 3	siCTRL	Tox+	siCT/ +	14525.7
3118	SPD 3	siCTRL	Tox+	siCT/ +	8013.94
3119	SPD 3	siCTRL	Tox+	siCT/ +	4934.03
3120	SPD 3	siCTRL	Tox+	siCT/ +	3817.51
3121	SPD 3	siCTRL	Tox+	siCT/ +	1903.52
3122	SPD 3	siCTRL	Tox+	siCT/ +	4177.28
3123	SPD 3	siCTRL	Tox+	siCT/ +	3589.59
3124	SPD 3	siCTRL	Tox+	siCT/ +	4051.52
3125	SPD 3	siCTRL	Tox+	siCT/ +	3102.61
3126	SPD 3	siCTRL	Tox+	siCT/ +	2291.26
3127	SPD 3	siCTRL	Tox+	siCT/ +	3666.58
3128	SPD 3	siCTRL	Tox+	siCT/ +	4474.83
3129	SPD 3	siCTRL	Tox+	siCT/ +	1345.65
3130	SPD 3	siCTRL	Tox+	siCT/ +	2683.74
3131	SPD 3	siCTRL	Tox+	siCT/ +	7446.3
3132	SPD 3	siCTRL	Tox+	siCT/ +	19028.3
3133	SPD 3	siCTRL	Tox+	siCT/ +	6671.78
3134	SPD 3	siCTRL	Tox+	siCT/ +	5494.96
3135	SPD 3	siCTRL	Tox+	siCT/ +	2124.09
3136	SPD 3	siCTRL	Tox+	siCT/ +	3694.99
3137	SPD 3	siCTRL	Tox+	siCT/ +	14955.8
3138	SPD 3	siCTRL	Tox+	siCT/ +	2010.45
3139	SPD 3	siCTRL	Tox+	siCT/ +	2534.27
3140	SPD 3	siCTRL	Tox+	siCT/ +	5404.4
3141	SPD 3	siCTRL	Tox+	siCT/ +	2495.59
3142	SPD 3	siCTRL	Tox+	siCT/ +	3599.55
3143	SPD 3	siCTRL	Tox+	siCT/ +	2086.74
3144	SPD 3	siCTRL	Tox+	siCT/ +	11097.3
3145	SPD 3	siCTRL	Tox+	siCT/ +	3011.86
3146	SPD 3	siCTRL	Tox+	siCT/ +	7861.87
3147	SPD 3	siCTRL	Tox+	siCT/ +	1508.31
3148	SPD 3	siCTRL	Tox+	siCT/ +	9585.16
3149	SPD 3	siCTRL	Tox+	siCT/ +	2584.56
3150	SPD 4	siCAV1	Tox-	siCAV 1/-	11721.6
3151	SPD 4	siCAV1	Tox-	siCAV 1/-	3270.28
3152	SPD 4	siCAV1	Tox-	siCAV 1/-	13222.7
3153	SPD 4	siCAV1	Tox-	siCAV 1/-	10247.4
3154	SPD 4	siCAV1	Tox-	siCAV 1/-	5762.18
3155	SPD 4	siCAV1	Tox-	siCAV 1/-	5150.83
3156	SPD 4	siCAV1	Tox-	siCAV 1/-	3012.05
3157	SPD 4	siCAV1	Tox-	siCAV 1/-	8914.48
3158	SPD 4	siCAV1	Tox-	siCAV 1/-	4285.4
[truncated: 2,027 more rows]

## Sheet: Figure 3D
Exp	Condition	Toxin	Repl	Cell	Volume
VOL4	siCAV1	Tox-	2	1	1362.72
VOL4	siCAV1	Tox-	2	2	2052.82
VOL4	siCAV1	Tox-	2	3	941.262
VOL4	siCAV1	Tox-	2	4	986.79
VOL4	siCAV1	Tox-	2	5	755.198
VOL4	siCAV1	Tox-	2	6	1589.26
VOL4	siCAV1	Tox-	2	7	1372.87
VOL4	siCAV1	Tox-	2	8	1233.24
VOL4	siCAV1	Tox-	2	9	1061
VOL4	siCAV1	Tox-	2	1	1551.84
VOL4	siCAV1	Tox-	2	2	1402.03
VOL4	siCAV1	Tox-	2	3	1484.85
VOL4	siCAV1	Tox-	2	4	2032.97
VOL4	siCAV1	Tox-	2	5	1949.56
VOL4	siCAV1	Tox-	2	6	1312.52
VOL4	siCAV1	Tox-	2	7	1022.65
VOL4	siCAV1	Tox-	2	8	2222.97
VOL4	siCAV1	Tox-	2	9	2251.92
VOL4	siCAV1	Tox-	2	10	1955.06
VOL4	siCAV1	Tox-	2	11	2133.25
VOL4	siCAV1	Tox-	2	12	1908
VOL4	siCAV1	Tox-	2	13	1329.67
VOL4	siCAV1	Tox-	2	14	1953.02
VOL4	siCAV1	Tox-	2	15	2380.86
VOL4	siCAV1	Tox-	2	16	2996.83
VOL4	siCAV1	Tox-	2	17	2381.18
VOL4	siCAV1	Tox-	2	18	2070.64
VOL4	siCAV1	Tox-	2	19	1105.59
VOL4	siCAV1	Tox-	2	20	1661.96
VOL4	siCAV1	Tox-	2	21	1054.33
VOL4	siCAV1	Tox-	2	22	1337.58
VOL4	siCAV1	Tox-	2	23	1942.84
VOL4	siCAV1	Tox-	2	24	1146.78
VOL4	siCAV1	Tox-	2	25	1466.55
VOL4	siCAV1	Tox-	2	26	1897.92
VOL4	siCAV1	Tox-	2	27	3002.17
VOL4	siCAV1	Tox-	2	28	2753.92
VOL4	siCAV1	Tox-	2	29	2409.12
VOL4	siCAV1	Tox-	2	30	1015.94
VOL4	siCAV1	Tox-	2	31	1104.83
VOL4	siCAV1	Tox-	1	1	2064.22
VOL4	siCAV1	Tox-	1	2	2507.45
VOL4	siCAV1	Tox-	1	3	1144.41
VOL4	siCAV1	Tox-	1	4	1087.58
VOL4	siCAV1	Tox-	1	5	2334.29
VOL4	siCAV1	Tox-	1	6	1895.11
VOL4	siCAV1	Tox-	1	7	2927.43
VOL4	siCAV1	Tox-	1	8	1814.73
VOL4	siCAV1	Tox-	1	9	1662.52
VOL4	siCAV1	Tox-	1	10	1978
VOL4	siCAV1	Tox-	1	11	2123.36
VOL4	siCAV1	Tox-	1	12	1487.73
VOL4	siCAV1	Tox-	1	13	1691.18
VOL4	siCAV1	Tox-	1	14	1942.68
VOL4	siCAV1	Tox-	1	15	2747.63
VOL4	siCAV1	Tox-	1	16	1435.26
VOL4	siCAV1	Tox-	1	17	1931.83
VOL4	siCAV1	Tox-	1	18	1860.02
VOL4	siCAV1	Tox-	1	19	1525.83
VOL4	siCAV1	Tox-	1	20	1849.05
VOL4	siCAV1	Tox+	2	1	1217.39
VOL4	siCAV1	Tox+	2	2	2359.77
VOL4	siCAV1	Tox+	2	3	2063.28
VOL4	siCAV1	Tox+	2	4	1251.27
VOL4	siCAV1	Tox+	2	5	1189.16
VOL4	siCAV1	Tox+	2	6	1556.5
VOL4	siCAV1	Tox+	2	7	1819.88
VOL4	siCAV1	Tox+	2	8	1975.8
VOL4	siCAV1	Tox+	2	9	1182.79
VOL4	siCAV1	Tox+	2	10	2100.93
VOL4	siCAV1	Tox+	2	11	1648.47
VOL4	siCAV1	Tox+	2	12	1170.43
VOL4	siCAV1	Tox+	2	13	1303.03
VOL4	siCAV1	Tox+	2	14	1781.43
VOL4	siCAV1	Tox+	2	15	2601.47
VOL4	siCAV1	Tox+	2	16	2479.78
VOL4	siCAV1	Tox+	2	17	2520.94
VOL4	siCAV1	Tox+	2	18	1770.07
VOL4	siCAV1	Tox+	2	19	1673.22
VOL4	siCAV1	Tox+	2	20	1967.35
VOL4	siCAV1	Tox+	2	21	2111.83
VOL4	siCAV1	Tox+	2	22	2710.8
VOL4	siCAV1	Tox+	2	23	1399.42
VOL4	siCAV1	Tox+	2	24	808.937
VOL4	siCAV1	Tox+	2	25	2097.61
VOL4	siCAV1	Tox+	2	26	2442.63
VOL4	siCAV1	Tox+	2	27	2516.35
VOL4	siCAV1	Tox+	2	28	1025.2
VOL4	siCAV1	Tox+	2	29	2281.22
VOL4	siCAV1	Tox+	2	30	2089.07
VOL4	siCAV1	Tox+	2	31	1954.02
VOL4	siCAV1	Tox+	2	32	1686.81
VOL4	siCAV1	Tox+	2	33	2792.33
VOL4	siCAV1	Tox+	2	34	2123.1
VOL4	siCAV1	Tox+	2	35	3040.7
VOL4	siCAV1	Tox+	2	36	1127.41
VOL4	siCAV1	Tox+	2	37	1529.66
VOL4	siCAV1	Tox+	2	38	1234.63
VOL4	siCAV1	Tox+	2	39	1234.63
VOL4	siCAV1	Tox+	2	40	1972.39
VOL4	siCAV1	Tox+	2	41	2120.24
VOL4	siCAV1	Tox+	1	1	1541.35
VOL4	siCAV1	Tox+	1	2	1216.51
VOL4	siCAV1	Tox+	1	3	1197.81
VOL4	siCAV1	Tox+	1	4	1945.27
VOL4	siCAV1	Tox+	1	5	1038.88
VOL4	siCAV1	Tox+	1	6	1667.12
VOL4	siCAV1	Tox+	1	7	1713.06
VOL4	siCAV1	Tox+	1	8	1682.13
VOL4	siCAV1	Tox+	1	9	948.417
VOL4	siCAV1	Tox+	1	10	2200.74
VOL4	siCAV1	Tox+	1	11	2205.88
VOL4	siCAV1	Tox+	1	12	1822.38
VOL4	siCAV1	Tox+	1	13	930.824
VOL4	siCAV1	Tox+	1	14	1790.47
VOL4	siCAV1	Tox+	1	15	2787.8
VOL4	siCAV1	Tox+	1	16	2999.93
VOL4	siCAV1	Tox+	1	17	2655.02
VOL4	siCAV1	Tox+	1	18	2414.41
VOL4	siCAV1	Tox+	1	19	2385.12
VOL4	siCAV1	Tox+	1	20	1543.11
VOL4	siCAV1	Tox+	1	21	1636.33
VOL4	siCAV1	Tox+	1	22	2165.02
VOL4	siCAV1	Tox+	1	23	2509.29
VOL4	siCAV1	Tox+	1	24	2589.88
VOL4	siCAV1	Tox+	1	25	1294.45
VOL4	siCAV1	Tox+	1	26	1754.16
VOL4	siCAV1	Tox+	1	27	3160.92
VOL4	siCAV1	Tox+	1	28	2847.33
VOL4	siCAV1	Tox+	1	29	1265.12
VOL4	siCAV1	Tox+	1	30	2069.26
VOL4	siCAV1	Tox+	1	31	2852.43
VOL4	siCAV1	Tox+	1	32	2803.38
VOL4	siCAV1	Tox+	1	33	2967.73
VOL4	siCAV1	Tox+	1	34	2866.92
VOL4	siCTRL	Tox-	1	1	2313.22
VOL4	siCTRL	Tox-	1	2	2775.94
VOL4	siCTRL	Tox-	1	3	2823.96
VOL4	siCTRL	Tox-	1	4	2296.77
VOL4	siCTRL	Tox-	1	5	2390.12
VOL4	siCTRL	Tox-	1	6	1683.83
VOL4	siCTRL	Tox-	1	7	1531.55
VOL4	siCTRL	Tox-	1	8	2293.02
VOL4	siCTRL	Tox-	1	9	2916.29
VOL4	siCTRL	Tox-	1	10	2306.58
VOL4	siCTRL	Tox-	1	11	1840.94
VOL4	siCTRL	Tox-	1	12	2397.29
VOL4	siCTRL	Tox-	1	13	2391.95
VOL4	siCTRL	Tox-	1	14	1786.43
VOL4	siCTRL	Tox-	1	15	1597.3
VOL4	siCTRL	Tox-	1	16	2479.16
VOL4	siCTRL	Tox-	1	17	1637.18
VOL4	siCTRL	Tox-	1	18	1514.44
VOL4	siCTRL	Tox-	1	19	2260.68
VOL4	siCTRL	Tox-	1	20	2065.98
VOL4	siCTRL	Tox-	1	21	1651.62
VOL4	siCTRL	Tox-	1	22	1492.12
VOL4	siCTRL	Tox-	1	23	2485.11
VOL4	siCTRL	Tox-	1	24	2300.93
VOL4	siCTRL	Tox-	1	25	2753.76
VOL4	siCTRL	Tox-	1	26	2158.26
VOL4	siCTRL	Tox-	1	27	2275.4
VOL4	siCTRL	Tox-	1	28	2922.22
VOL4	siCTRL	Tox-	1	29	2190.9
VOL4	siCTRL	Tox-	1	30	2779.93
VOL4	siCTRL	Tox-	1	31	2627.04
VOL4	siCTRL	Tox-	1	32	2383.42
VOL4	siCTRL	Tox-	1	33	2848.19
VOL4	siCTRL	Tox-	1	34	2091.78
VOL4	siCTRL	Tox-	1	35	2541.08
VOL4	siCTRL	Tox-	2	1	1800.82
VOL4	siCTRL	Tox-	2	2	1416.69
VOL4	siCTRL	Tox-	2	3	1846.43
VOL4	siCTRL	Tox-	2	4	1685.28
VOL4	siCTRL	Tox-	2	5	1484.76
VOL4	siCTRL	Tox-	2	6	1817.44
VOL4	siCTRL	Tox-	2	7	1721.69
VOL4	siCTRL	Tox-	2	8	1787.17
VOL4	siCTRL	Tox-	2	9	2435.03
VOL4	siCTRL	Tox-	2	10	1444.42
VOL4	siCTRL	Tox-	2	11	1938.21
VOL4	siCTRL	Tox-	2	12	1817.35
VOL4	siCTRL	Tox-	2	13	1354.33
VOL4	siCTRL	Tox-	2	14	2297.71
VOL4	siCTRL	Tox-	2	15	1532.3
VOL4	siCTRL	Tox-	2	16	2297.71
VOL4	siCTRL	Tox-	2	17	1532.3
VOL4	siCTRL	Tox+	2	1	2171.37
VOL4	siCTRL	Tox+	2	2	1103.86
VOL4	siCTRL	Tox+	2	3	2153.31
VOL4	siCTRL	Tox+	2	4	2632.92
VOL4	siCTRL	Tox+	2	5	2219.82
VOL4	siCTRL	Tox+	2	6	1600.14
VOL4	siCTRL	Tox+	2	7	1775.32
VOL4	siCTRL	Tox+	2	8	2810.38
VOL4	siCTRL	Tox+	2	9	2148.38
VOL4	siCTRL	Tox+	2	10	1768.52
VOL4	siCTRL	Tox+	2	11	1519.7
VOL4	siCTRL	Tox+	2	12	1925.57
VOL4	siCTRL	Tox+	2	13	2210.92
VOL4	siCTRL	Tox+	2	14	1759.36
VOL4	siCTRL	Tox+	2	15	2010.59
VOL4	siCTRL	Tox+	2	16	2542.66
VOL4	siCTRL	Tox+	2	17	2069.38
VOL4	siCTRL	Tox+	2	18	2360.33
VOL4	siCTRL	Tox+	2	19	1778.32
VOL4	siCTRL	Tox+	2	20	1965.8
VOL4	siCTRL	Tox+	2	21	1745.61
VOL4	siCTRL	Tox+	2	22	1660.76
VOL4	siCTRL	Tox+	2	23	2057.69
VOL4	siCTRL	Tox+	2	24	2638.61
VOL4	siCTRL	Tox+	2	25	1727.33
VOL4	siCTRL	Tox+	2	26	1837.57
VOL4	siCTRL	Tox+	2	27	1702.88
VOL4	siCTRL	Tox+	2	28	3707.17
VOL4	siCTRL	Tox+	2	29	1678.01
VOL4	siCTRL	Tox+	2	30	1694.27
VOL4	siCTRL	Tox+	2	31	2116.27
VOL4	siCTRL	Tox+	2	32	2033
VOL4	siCTRL	Tox+	2	33	2626.46
VOL4	siCTRL	Tox+	2	34	2515.23
VOL4	siCTRL	Tox+	2	35	2856.47
VOL4	siCTRL	Tox+	2	36	1677.12
VOL4	siCTRL	Tox+	2	37	2477.88
VOL4	siCTRL	Tox+	2	38	2465.67
VOL4	siCTRL	Tox+	2	39	1810.5
VOL4	siCTRL	Tox+	2	40	2716.86
VOL4	siCTRL	Tox+	2	41	3102.93
VOL4	siCTRL	Tox+	2	42	2758.47
VOL4	siCTRL	Tox+	2	43	2723.74
VOL4	siCTRL	Tox+	2	44	2512.57
VOL4	siCTRL	Tox+	2	45	4406.92
VOL4	siCTRL	Tox+	2	46	2933.55
VOL4	siCTRL	Tox+	2	47	2493.6
VOL4	siCTRL	Tox+	2	48	1915.89
VOL4	siCTRL	Tox+	2	49	2664.29
VOL4	siCTRL	Tox+	2	50	2755.29
VOL4	siCTRL	Tox+	2	51	2030.41
VOL4	siCTRL	Tox+	2	52	1949.26
VOL4	siCTRL	Tox+	2	53	2975.29
VOL4	siCTRL	Tox+	2	54	1869.84
VOL4	siCTRL	Tox+	2	55	3879.34
VOL4	siCTRL	Tox+	2	56	3452.03
VOL4	siCTRL	Tox+	2	57	3898.49
VOL4	siCTRL	Tox+	1	1	2146.41
VOL4	siCTRL	Tox+	1	2	2208.69
VOL4	siCTRL	Tox+	1	3	1636.79
VOL4	siCTRL	Tox+	1	4	2192.08
VOL4	siCTRL	Tox+	1	5	1817.41
VOL4	siCTRL	Tox+	1	6	2559.2
VOL4	siCTRL	Tox+	1	6	1989.01
VOL4	siCTRL	Tox+	1	7	2192.03
VOL4	siCTRL	Tox+	1	8	2071.09
VOL4	siCTRL	Tox+	1	8	2166.45
VOL4	siCTRL	Tox+	1	9	2400.37
VOL4	siCTRL	Tox+	1	10	1993.03
VOL4	siCTRL	Tox+	1	10	2213.81
VOL4	siCTRL	Tox+	1	11	2143.08
VOL4	siCTRL	Tox+	1	12	3276.86
VOL4	siCTRL	Tox+	1	12	2439.02
VOL4	siCTRL	Tox+	1	13	1819.21
VOL4	siCTRL	Tox+	1	14	2129.58
VOL4	siCTRL	Tox+	1	14	1692.75
VOL4	siCTRL	Tox+	1	15	1643.74
VOL4	siCTRL	Tox+	1	16	2074.69
VOL4	siCTRL	Tox+	1	16	2405.85
VOL4	siCTRL	Tox+	1	17	3254.49
VOL4	siCTRL	Tox+	1	18	3263.73
VOL4	siCTRL	Tox+	1	18	2961.61
VOL4	siCTRL	Tox+	1	19	2981.56
VOL4	siCTRL	Tox+	1	20	1851.55
VOL4	siCTRL	Tox+	1	20	2740.64
VOL4	siCTRL	Tox+	1	21	2059.36
VOL4	siCTRL	Tox+	1	22	2340.37
VOL4	siCTRL	Tox+	1	22	2790.35
VOL4	siCTRL	Tox+	1	23	2884.19
VOL4	siCTRL	Tox+	1	24	3430.25
VOL4	siCTRL	Tox+	1	24	4045.68
VOL4	siCTRL	Tox+	1	25	3979.63
VOL4	siCTRL	Tox+	1	26	2141.44
VOL4	siCTRL	Tox+	1	26	2281.9
VOL4	siCTRL	Tox+	1	27	2111.49
VOL4	siCTRL	Tox+	1	28	2257.08
VOL4	siCTRL	Tox+	1	28	1853.65
VOL4	siCTRL	Tox+	1	29	1807.3
VOL4	siCTRL	Tox+	1	30	2333.2
VOL4	siCTRL	Tox+	1	30	2065.09
VOL4	siCTRL	Tox+	1	31	2218.89
VOL4	siCTRL	Tox+	1	32	2367.06
VOL4	siCTRL	Tox+	1	32	2187.38
VOL4	siCTRL	Tox+	1	33	1993.65
VOL4	siCTRL	Tox+	1	34	2366.33
VOL4	siCTRL	Tox+	1	34	2221.83
VOL4	siCTRL	Tox+	1	35	2125.17
VOL4	siCavin1	Tox-	1	1	1608.71
VOL4	siCavin1	Tox-	1	2	1398.19
VOL4	siCavin1	Tox-	1	3	2045.19
VOL4	siCavin1	Tox-	1	4	1808.14
VOL4	siCavin1	Tox-	1	5	2634.72
VOL4	siCavin1	Tox-	1	6	1697.26
VOL4	siCavin1	Tox-	1	7	1735.81
VOL4	siCavin1	Tox-	1	8	2748.81
VOL4	siCavin1	Tox-	1	9	2589.57
VOL4	siCavin1	Tox-	1	10	3049.53
VOL4	siCavin1	Tox-	1	11	1978.92
VOL4	siCavin1	Tox-	1	12	961.724
VOL4	siCavin1	Tox-	1	13	2928.96
VOL4	siCavin1	Tox-	1	14	2581.85
VOL4	siCavin1	Tox-	1	15	2799.36
VOL4	siCavin1	Tox-	1	16	1943.11
VOL4	siCavin1	Tox-	1	17	2491.24
VOL4	siCavin1	Tox-	1	18	940.795
VOL4	siCavin1	Tox-	1	19	2225.16
VOL4	siCavin1	Tox-	1	20	1680.44
VOL4	siCavin1	Tox-	1	21	1929.7
VOL4	siCavin1	Tox-	1	22	964.658
VOL4	siCavin1	Tox-	1	23	949.626
VOL4	siCavin1	Tox-	1	24	1784.7
VOL4	siCavin1	Tox-	1	25	1876.91
VOL4	siCavin1	Tox-	1	26	2346.77
VOL4	siCavin1	Tox-	1	27	1672.17
VOL4	siCavin1	Tox-	1	28	673.051
VOL4	siCavin1	Tox-	1	29	2106.5
VOL4	siCavin1	Tox-	1	30	1838.88
VOL4	siCavin1	Tox-	1	31	1636.52
VOL4	siCavin1	Tox-	1	32	1538.85
VOL4	siCavin1	Tox-	1	33	1484.47
VOL4	siCavin1	Tox-	1	34	1278.84
VOL4	siCavin1	Tox-	1	35	1870.88
VOL4	siCavin1	Tox-	1	36	2698.32
VOL4	siCavin1	Tox-	1	37	1999.97
VOL4	siCavin1	Tox-	1	38	1547.94
VOL4	siCavin1	Tox-	1	39	885.872
VOL4	siCavin1	Tox-	1	40	1732.94
VOL4	siCavin1	Tox-	1	41	860.686
VOL4	siCavin1	Tox-	1	42	1307.99
VOL4	siCavin1	Tox-	1	43	1277.28
VOL4	siCavin1	Tox-	1	44	2255.76
VOL4	siCavin1	Tox-	1	45	1561.94
VOL4	siCavin1	Tox-	1	46	1343.38
VOL4	siCavin1	Tox-	1	47	1194.71
VOL4	siCavin1	Tox-	1	48	947.371
VOL4	siCavin1	Tox-	1	49	1827.33
VOL4	siCavin1	Tox-	1	50	2329.75
VOL4	siCavin1	Tox-	1	51	1735.08
VOL4	siCavin1	Tox-	1	52	2213.56
VOL4	siCavin1	Tox-	1	53	2150.33
VOL4	siCavin1	Tox-	1	54	2428.45
VOL4	siCavin1	Tox-	1	55	2514.12
VOL4	siCavin1	Tox-	1	56	885.27
VOL4	siCavin1	Tox-	1	57	1446.22
VOL4	siCavin1	Tox-	1	58	1052.3
VOL4	siCavin1	Tox-	1	59	818.108
VOL4	siCavin1	Tox-	1	60	1968.4
VOL4	siCavin1	Tox-	1	61	1755.17
VOL4	siCavin1	Tox-	2	1	1237.3
VOL4	siCavin1	Tox-	2	2	2575.58
VOL4	siCavin1	Tox-	2	3	1234.2
VOL4	siCavin1	Tox-	2	4	1167.29
VOL4	siCavin1	Tox-	2	5	1260.57
VOL4	siCavin1	Tox-	2	6	1457.01
VOL4	siCavin1	Tox-	2	7	1915.27
VOL4	siCavin1	Tox-	2	8	1368.15
VOL4	siCavin1	Tox-	2	9	1318.57
VOL4	siCavin1	Tox-	2	10	1296.99
VOL4	siCavin1	Tox-	2	11	1120.61
VOL4	siCavin1	Tox-	2	12	1166.05
VOL4	siCavin1	Tox-	2	13	1625.92
VOL4	siCavin1	Tox-	2	14	955.128
VOL4	siCavin1	Tox-	2	15	1433.36
VOL4	siCavin1	Tox-	2	16	1831
VOL4	siCavin1	Tox-	2	17	1148.55
VOL4	siCavin1	Tox-	2	18	1692.92
VOL4	siCavin1	Tox-	2	19	1111.99
VOL4	siCavin1	Tox-	2	20	2468.32
VOL4	siCavin1	Tox-	2	21	2022.58
VOL4	siCavin1	Tox-	2	22	2105.36
VOL4	siCavin1	Tox-	2	23	1121.87
VOL4	siCavin1	Tox-	2	24	1498.82
VOL4	siCavin1	Tox-	2	25	1147.97
VOL4	siCavin1	Tox-	2	26	946.092
VOL4	siCavin1	Tox-	2	27	1529.25
VOL4	siCavin1	Tox-	2	28	1658.31
VOL4	siCavin1	Tox-	2	29	1061.46
VOL4	siCavin1	Tox-	2	30	788.875
VOL4	siCavin1	Tox-	2	31	654.634
VOL4	siCavin1	Tox-	2	32	805.668
VOL4	siCavin1	Tox-	2	33	1896.62
VOL4	siCavin1	Tox-	2	34	811.126
VOL4	siCavin1	Tox-	2	35	1483.11
VOL4	siCavin1	Tox-	2	36	1510.62
VOL4	siCavin1	Tox-	2	37	2371.62
VOL4	siCavin1	Tox-	2	38	2084.57
VOL4	siCavin1	Tox-	2	39	1351.14
VOL4	siCavin1	Tox-	2	40	2000.51
VOL4	siCavin1	Tox-	2	41	908.571
VOL4	siCavin1	Tox-	2	42	1575.57
VOL4	siCavin1	Tox-	2	43	1761.36
VOL4	siCavin1	Tox+	2	1	1336.2
VOL4	siCavin1	Tox+	2	2	1705.64
VOL4	siCavin1	Tox+	2	3	1587.27
VOL4	siCavin1	Tox+	2	4	1922.47
VOL4	siCavin1	Tox+	2	5	2665.19
VOL4	siCavin1	Tox+	2	6	1695.77
VOL4	siCavin1	Tox+	2	7	1582.32
VOL4	siCavin1	Tox+	2	8	1434.51
VOL4	siCavin1	Tox+	2	9	1867.77
VOL4	siCavin1	Tox+	2	10	3905.86
VOL4	siCavin1	Tox+	2	11	2243.72
VOL4	siCavin1	Tox+	2	12	3958.98
VOL4	siCavin1	Tox+	2	13	1585.1
VOL4	siCavin1	Tox+	2	14	2267.54
VOL4	siCavin1	Tox+	2	15	3270.03
VOL4	siCavin1	Tox+	2	16	1514.65
VOL4	siCavin1	Tox+	2	17	1744.38
VOL4	siCavin1	Tox+	2	18	2143.71
VOL4	siCavin1	Tox+	2	19	1639.75
VOL4	siCavin1	Tox+	2	20	2241.79
VOL4	siCavin1	Tox+	2	21	3600.24
VOL4	siCavin1	Tox+	2	22	2377.85
VOL4	siCavin1	Tox+	2	23	1686.13
VOL4	siCavin1	Tox+	2	24	1705.57
VOL4	siCavin1	Tox+	2	25	1656.78
VOL4	siCavin1	Tox+	2	26	2076.48
VOL4	siCavin1	Tox+	2	27	2488.37
VOL4	siCavin1	Tox+	2	28	1748.44
VOL4	siCavin1	Tox+	2	29	3050.78
VOL4	siCavin1	Tox+	2	30	1753.67
VOL4	siCavin1	Tox+	2	31	2061.28
VOL4	siCavin1	Tox+	2	32	2266.28
VOL4	siCavin1	Tox+	2	33	1708.17
VOL4	siCavin1	Tox+	2	34	1845.99
VOL4	siCavin1	Tox+	2	35	2560.38
VOL4	siCavin1	Tox+	2	36	2044.16
VOL4	siCavin1	Tox+	2	37	1731.78
VOL4	siCavin1	Tox+	2	38	1822.01
VOL4	siCavin1	Tox+	2	39	1813.41
VOL4	siCavin1	Tox+	2	40	1813.41
VOL4	siCavin1	Tox+	2	41	1656.21
VOL4	siCavin1	Tox+	2	42	1674.1
VOL4	siCavin1	Tox+	2	43	2234.83
VOL4	siCavin1	Tox+	2	44	2045.19
VOL4	siCavin1	Tox+	2	45	2200.43
VOL3	siCAV1	Tox-	1	1	1777.75
VOL3	siCAV1	Tox-	1	2	1445.9
VOL3	siCAV1	Tox-	1	3	3584.57
VOL3	siCAV1	Tox-	1	4	2444.3
VOL3	siCAV1	Tox-	1	5	2719.2
VOL3	siCAV1	Tox-	1	6	1567.65
VOL3	siCAV1	Tox-	1	7	2379.14
VOL3	siCAV1	Tox-	1	8	2555.32
VOL3	siCAV1	Tox-	1	9	2575.28
VOL3	siCAV1	Tox-	1	10	1218.98
VOL3	siCAV1	Tox-	1	11	2752.4
VOL3	siCAV1	Tox-	1	12	2085.39
VOL3	siCAV1	Tox-	1	13	2266.38
VOL3	siCAV1	Tox-	1	14	1249.96
VOL3	siCAV1	Tox-	1	15	1557.3
VOL3	siCAV1	Tox-	1	16	1347.17
VOL3	siCAV1	Tox-	1	17	1741.28
VOL3	siCAV1	Tox-	1	18	2375.26
VOL3	siCAV1	Tox-	1	19	2826
VOL3	siCAV1	Tox-	1	20	2276.02
VOL3	siCAV1	Tox-	1	21	2585.85
VOL3	siCAV1	Tox-	1	22	2991.43
VOL3	siCAV1	Tox-	1	23	2416.62
VOL3	siCAV1	Tox-	1	24	1627.27
VOL3	siCAV1	Tox-	1	25	1680.96
VOL3	siCAV1	Tox-	1	26	2916.67
VOL3	siCAV1	Tox-	1	27	2023.7
VOL3	siCAV1	Tox-	1	28	2850.39
VOL3	siCAV1	Tox-	1	29	1922.38
VOL3	siCAV1	Tox-	1	30	1088.19
VOL3	siCAV1	Tox-	1	31	2247.59
VOL3	siCAV1	Tox-	1	32	1140.99
VOL3	siCAV1	Tox-	1	33	2452.98
VOL3	siCAV1	Tox-	1	34	1334.99
VOL3	siCAV1	Tox-	1	35	2807.11
VOL3	siCAV1	Tox-	1	36	2591.47
VOL3	siCAV1	Tox-	1	37	3482.78
VOL3	siCAV1	Tox-	1	38	2949.57
VOL3	siCAV1	Tox-	1	39	2753.5
VOL3	siCAV1	Tox-	1	40	2484.21
VOL3	siCAV1	Tox-	1	41	2236.38
VOL3	siCAV1	Tox-	1	42	2474.27
VOL3	siCAV1	Tox-	1	43	1186.36
VOL3	siCAV1	Tox-	1	44	960.385
VOL3	siCAV1	Tox-	1	45	2215.96
VOL3	siCAV1	Tox-	1	46	3090.07
VOL3	siCAV1	Tox-	1	47	1737.93
VOL3	siCAV1	Tox-	1	48	2987.31
VOL3	siCAV1	Tox-	1	49	3066.8
VOL3	siCAV1	Tox-	1	50	3177.55
VOL3	siCAV1	Tox-	1	51	2386.51
VOL3	siCAV1	Tox-	1	52	2624.25
VOL3	siCAV1	Tox-	1	53	2769.55
VOL3	siCAV1	Tox-	1	54	1270.36
VOL3	siCAV1	Tox-	1	55	1054.41
VOL3	siCAV1	Tox-	1	56	2541.74
VOL3	siCAV1	Tox-	1	57	1319.54
VOL3	siCAV1	Tox-	1	58	2199.55
VOL3	siCAV1	Tox-	1	59	1688.79
VOL3	siCAV1	Tox+	1	1	2776.65
VOL3	siCAV1	Tox+	1	2	1774.89
VOL3	siCAV1	Tox+	1	3	1747.55
VOL3	siCAV1	Tox+	1	4	820.423
VOL3	siCAV1	Tox+	1	5	2437.21
VOL3	siCAV1	Tox+	1	6	2678.4
VOL3	siCAV1	Tox+	1	7	1835.44
VOL3	siCAV1	Tox+	1	8	2099.9
VOL3	siCAV1	Tox+	1	9	1348.35
VOL3	siCAV1	Tox+	1	10	1135.02
VOL3	siCAV1	Tox+	1	11	1312.04
VOL3	siCAV1	Tox+	1	12	802.228
VOL3	siCAV1	Tox+	1	13	2826.19
VOL3	siCAV1	Tox+	1	14	1823.03
VOL3	siCAV1	Tox+	1	15	2156.64
VOL3	siCAV1	Tox+	1	16	1460.63
VOL3	siCAV1	Tox+	1	17	1976.2
VOL3	siCAV1	Tox+	1	18	1861.57
VOL3	siCAV1	Tox+	1	19	3068.36
VOL3	siCAV1	Tox+	1	20	2009.59
VOL3	siCAV1	Tox+	1	21	3082.41
VOL3	siCAV1	Tox+	1	22	1527.77
VOL3	siCAV1	Tox+	1	23	1639.81
VOL3	siCAV1	Tox+	1	24	3486.21
VOL3	siCAV1	Tox+	1	25	3324.69
VOL3	siCAV1	Tox+	1	26	2405.29
VOL3	siCAV1	Tox+	1	27	3740.86
VOL3	siCAV1	Tox+	1	28	2952.45
VOL3	siCAV1	Tox+	2	1	1356.82
VOL3	siCAV1	Tox+	2	2	1402.68
VOL3	siCAV1	Tox+	2	3	981.094
VOL3	siCAV1	Tox+	2	4	3374.09
VOL3	siCAV1	Tox+	2	5	1764.72
VOL3	siCAV1	Tox+	2	6	2534.04
VOL3	siCAV1	Tox+	2	7	2611.66
VOL3	siCAV1	Tox+	2	8	927.999
VOL3	siCAV1	Tox+	2	9	1715.17
VOL3	siCAV1	Tox+	2	10	1490.31
VOL3	siCAV1	Tox+	2	11	1974.86
VOL3	siCAV1	Tox+	2	12	1343.55
VOL3	siCAV1	Tox+	2	13	1564.6
VOL3	siCAV1	Tox+	2	14	1973.49
VOL3	siCAV1	Tox+	2	15	1482.43
VOL3	siCAV1	Tox+	2	16	2905.63
VOL3	siCAV1	Tox+	2	17	1799.44
VOL3	siCAV1	Tox+	2	18	2861.16
VOL3	siCAV1	Tox+	2	19	1425.64
VOL3	siCAV1	Tox+	2	20	1653.83
VOL3	siCAV1	Tox+	2	21	3115.76
VOL3	siCAV1	Tox+	2	22	2148.35
VOL3	siCAV1	Tox+	2	23	2214.59
VOL3	siCAV1	Tox+	2	24	3449.37
VOL3	siCAV1	Tox+	2	25	2058.43
VOL3	siCAV1	Tox+	2	26	3798.31
VOL3	siCAV1	Tox+	2	27	3027.64
VOL3	siCAV1	Tox+	2	28	3440.73
VOL3	siCAV1	Tox+	2	29	1666.19
VOL3	siCAV1	Tox+	2	30	1616.49
VOL3	siCAV1	Tox+	2	31	2254.18
VOL3	siCAV1	Tox+	2	32	2711.38
VOL3	siCAV1	Tox+	2	33	2735.36
VOL3	siCAV1	Tox+	2	34	1491.49
VOL3	siCAV1	Tox+	2	35	2236.26
VOL3	siCAV1	Tox+	2	36	1883.05
VOL3	siCAV1	Tox+	2	37	1559.94
VOL3	siCAV1	Tox+	2	38	1191.35
VOL3	siCAV1	Tox+	2	39	3022.87
VOL3	siCAV1	Tox+	2	40	1559.01
VOL3	siCAV1	Tox+	2	41	2507.21
VOL3	siCAV1	Tox+	2	42	2069.3
VOL3	siCAV1	Tox+	2	43	1580.29
VOL3	siCAV1	Tox+	2	44	2409.71
VOL3	siCAV1	Tox+	2	45	1365.78
VOL3	siCAV1	Tox+	2	46	2311.83
VOL3	siCAV1	Tox+	2	47	1865.95
VOL3	siCAV1	Tox+	2	48	3656.16
VOL3	siCAV1	Tox+	2	49	1233.22
VOL3	siCAV1	Tox+	2	50	1896.76
VOL3	siCAV1	Tox+	2	51	1756.5
VOL3	siCAV1	Tox+	2	52	2731.09
VOL3	siCAV1	Tox+	2	53	3110.4
VOL3	siCAV1	Tox+	2	54	1279.17
VOL3	siCAV1	Tox+	2	55	1772.04
VOL3	siCAV1	Tox+	2	56	2193.79
VOL3	siCAV1	Tox+	2	57	1524.91
VOL3	siCAV1	Tox+	2	58	1381.44
VOL3	siCAV1	Tox+	2	59	1061.74
VOL3	siCAV1	Tox+	2	60	2558.36
VOL3	siCAV1	Tox+	2	61	1968.54
VOL3	siCTRL	Tox+	1	1	1828.09
VOL3	siCTRL	Tox+	1	2	2034.24
VOL3	siCTRL	Tox+	1	3	2699.94
VOL3	siCTRL	Tox+	1	4	1389.52
VOL3	siCTRL	Tox+	1	5	3185.73
VOL3	siCTRL	Tox+	1	6	2231.39
VOL3	siCTRL	Tox+	1	7	3612.55
VOL3	siCTRL	Tox+	1	8	3210.59
VOL3	siCTRL	Tox+	1	9	2493.03
VOL3	siCTRL	Tox+	1	10	3274.64
VOL3	siCTRL	Tox+	1	11	2039.15
VOL3	siCTRL	Tox+	1	12	2075.26
VOL3	siCTRL	Tox+	1	13	2158.84
VOL3	siCTRL	Tox+	1	14	1393.03
VOL3	siCTRL	Tox+	2	1	1812.34
VOL3	siCTRL	Tox+	2	2	4776.57
VOL3	siCTRL	Tox+	2	3	1897.66
VOL3	siCTRL	Tox+	2	4	8436.95
VOL3	siCTRL	Tox+	2	5	1200.17
VOL3	siCTRL	Tox+	2	6	4465.32
VOL3	siCTRL	Tox+	2	7	4983.98
VOL3	siCTRL	Tox+	2	8	1641.97
VOL3	siCTRL	Tox+	2	9	2769.13
VOL3	siCTRL	Tox+	2	10	4270.32
VOL3	siCTRL	Tox+	2	11	2927.6
VOL3	siCTRL	Tox+	2	12	5406.27
VOL3	siCTRL	Tox+	2	13	2517.96
VOL3	siCTRL	Tox+	2	14	3193.18
VOL3	siCTRL	Tox+	2	15	1885.78
VOL3	siCTRL	Tox+	2	16	1960.79
VOL3	siCTRL	Tox+	2	17	1966.49
VOL3	siCTRL	Tox+	2	18	2367.9
VOL3	siCTRL	Tox+	2	19	1956.71
VOL3	siCTRL	Tox+	2	20	1772.28
VOL3	siCTRL	Tox+	2	21	3020.12
VOL3	siCTRL	Tox+	2	22	3401.53
VOL3	siCTRL	Tox+	2	23	2976.59
VOL3	siCTRL	Tox+	2	24	2756.92
VOL3	siCTRL	Tox+	2	25	1646.74
VOL3	siCTRL	Tox+	2	26	4326.84
VOL3	siCTRL	Tox+	2	27	2373.74
VOL3	siCTRL	Tox+	2	28	3351.9
VOL3	siCTRL	Tox+	2	29	1413.71
VOL3	siCTRL	Tox+	2	30	1364.74
VOL3	siCTRL	Tox+	2	31	4461.05
VOL3	siCTRL	Tox+	2	32	2544.61
VOL3	siCTRL	Tox+	2	33	3216.5
VOL3	siCTRL	Tox+	2	34	1993.93
VOL3	siCTRL	Tox+	2	35	2804.66
VOL3	siCTRL	Tox+	2	36	1974.19
VOL3	siCTRL	Tox+	2	37	2015.54
VOL3	siCTRL	Tox+	2	38	4027.42
VOL3	siCTRL	Tox+	2	39	2661.2
VOL3	siCTRL	Tox+	2	40	2309.73
VOL3	siCTRL	Tox+	2	41	3030.71
VOL3	siCTRL	Tox+	2	42	1631.98
VOL3	siCTRL	Tox+	2	43	2549.64
VOL3	siCTRL	Tox+	2	44	1876.17
VOL3	siCTRL	Tox+	2	45	3590.39
VOL3	siCTRL	Tox+	2	46	1959.48
VOL3	siCTRL	Tox+	2	47	2846.88
VOL3	siCTRL	Tox+	2	48	2494.7
VOL3	siCTRL	Tox+	2	49	2183.73
VOL3	siCTRL	Tox+	2	50	2771.76
VOL3	siCTRL	Tox+	2	51	2581.04
VOL3	siCTRL	Tox+	2	52	2066.81
VOL3	siCTRL	Tox+	2	53	2667.58
VOL3	siCTRL	Tox+	2	54	2451.6
VOL3	siCTRL	Tox+	2	55	4066.59
VOL3	siCTRL	Tox+	2	56	3500.07
VOL3	siCTRL	Tox+	2	57	4349.7
VOL3	siCTRL	Tox+	2	58	2570.89
VOL3	siCTRL	Tox+	2	59	1631.74
VOL3	siCTRL	Tox+	2	60	1928.76
VOL3	siCTRL	Tox+	2	61	2247.83
VOL3	siCTRL	Tox+	2	62	2549.08
VOL3	siCTRL	Tox+	2	63	2608.6
VOL3	siCTRL	Tox+	2	64	1595.87
VOL3	siCTRL	Tox+	2	65	3945.16
VOL3	siCTRL	Tox-	2	1	1885.62
VOL3	siCTRL	Tox-	2	2	2538.96
VOL3	siCTRL	Tox-	2	3	3138.58
VOL3	siCTRL	Tox-	2	4	4149.43
VOL3	siCTRL	Tox-	2	5	2115.55
VOL3	siCTRL	Tox-	2	6	2583.63
VOL3	siCTRL	Tox-	2	7	2503.6
VOL3	siCTRL	Tox-	2	8	2364.71
VOL3	siCTRL	Tox-	2	9	4338.85
VOL3	siCTRL	Tox-	2	10	5585.53
VOL3	siCTRL	Tox-	2	11	3825.54
VOL3	siCTRL	Tox-	2	12	2642.28
VOL3	siCTRL	Tox-	2	13	4751.67
VOL3	siCTRL	Tox-	2	14	1373.27
VOL3	siCTRL	Tox-	2	15	1213.15
VOL3	siCTRL	Tox-	2	16	5435.34
VOL3	siCTRL	Tox-	2	17	3162
VOL3	siCTRL	Tox-	2	18	2466.82
VOL3	siCTRL	Tox-	2	19	5055.38
VOL3	siCTRL	Tox-	2	20	2127.84
VOL3	siCTRL	Tox-	2	21	2547.7
VOL3	siCTRL	Tox-	2	22	3080.79
VOL3	siCTRL	Tox-	2	23	1229.18
VOL3	siCTRL	Tox-	2	24	1123.58
VOL3	siCTRL	Tox-	2	25	1416.46
VOL3	siCTRL	Tox-	2	26	1483.88
VOL3	siCTRL	Tox-	2	27	1584.72
VOL3	siCTRL	Tox-	2	28	1368.2
VOL3	siCTRL	Tox-	2	29	1202.92
VOL3	siCTRL	Tox-	2	30	2079.78
VOL3	siCTRL	Tox-	2	31	2255.38
VOL3	siCTRL	Tox-	2	32	2114.57
VOL3	siCTRL	Tox-	2	33	1447.88
VOL3	siCTRL	Tox-	2	34	2350.69
VOL3	siCTRL	Tox-	2	35	1530.17
VOL3	siCTRL	Tox-	2	36	1554.88
VOL3	siCTRL	Tox-	2	37	886.213
VOL3	siCTRL	Tox-	2	38	2599.69
VOL3	siCTRL	Tox-	2	39	1622.8
VOL3	siCTRL	Tox-	2	40	638.409
VOL3	siCTRL	Tox-	2	41	2205.01
VOL3	siCTRL	Tox-	2	42	1408.96
VOL3	siCTRL	Tox-	2	43	4191.25
VOL3	siCTRL	Tox-	2	44	2375
VOL3	siCTRL	Tox-	2	45	2071.21
VOL3	siCTRL	Tox-	2	46	858.891
VOL3	siCTRL	Tox-	2	47	2406.7
VOL3	siCTRL	Tox-	2	48	1104.15
VOL3	siCTRL	Tox-	2	49	1242.17
VOL3	siCTRL	Tox-	2	50	2498.32
VOL3	siCTRL	Tox-	2	51	2438.22
VOL3	siCTRL	Tox-	2	52	1431.95
VOL3	siCTRL	Tox-	2	53	1796.1
VOL3	siCTRL	Tox-	2	54	1945.97
VOL3	siCTRL	Tox-	2	55	1274.52
VOL3	siCTRL	Tox-	2	56	3183.36
VOL3	siCTRL	Tox-	2	57	3371.56
VOL3	siCTRL	Tox-	2	58	2085.61
VOL3	siCTRL	Tox-	2	59	1386.18
VOL3	siCTRL	Tox-	2	60	1266.15
VOL3	siCTRL	Tox-	2	61	2110.71
VOL3	siCTRL	Tox-	2	62	1418.65
VOL3	siCTRL	Tox-	2	63	1737.2
VOL3	siCTRL	Tox-	2	64	1568.42
VOL3	siCTRL	Tox-	2	65	1845.72
VOL3	siCTRL	Tox-	2	66	3236.26
VOL3	siCTRL	Tox-	2	67	2024.57
VOL3	siCTRL	Tox-	2	68	1837.2
VOL3	siCavin1	Tox+	2	1	4120.56
VOL3	siCavin1	Tox+	2	2	2811.8
VOL3	siCavin1	Tox+	2	3	1035.31
VOL3	siCavin1	Tox+	2	4	1934.79
VOL3	siCavin1	Tox+	2	5	1044.07
VOL3	siCavin1	Tox+	2	6	3472.97
VOL3	siCavin1	Tox+	2	7	1794.47
VOL3	siCavin1	Tox+	2	8	1347.06
VOL3	siCavin1	Tox+	2	9	1796.31
VOL3	siCavin1	Tox+	2	10	1140.76
VOL3	siCavin1	Tox+	2	11	3433.02
VOL3	siCavin1	Tox+	2	12	2002.55
VOL3	siCavin1	Tox+	2	13	1673.84
VOL3	siCavin1	Tox+	2	14	3087.09
VOL3	siCavin1	Tox+	2	15	1690.64
VOL3	siCavin1	Tox+	2	16	2053.08
VOL3	siCavin1	Tox+	2	17	1326.54
VOL3	siCavin1	Tox+	2	18	2282.01
VOL3	siCavin1	Tox+	2	19	2654.31
VOL3	siCavin1	Tox+	2	20	2053.82
VOL3	siCavin1	Tox+	2	21	1320.87
VOL3	siCavin1	Tox+	2	22	1521.88
VOL3	siCavin1	Tox+	2	23	1392.5
VOL3	siCavin1	Tox+	2	24	1339.14
VOL3	siCavin1	Tox+	2	25	1400.37
VOL3	siCavin1	Tox+	2	26	2105.49
VOL3	siCavin1	Tox+	2	27	1451.67
VOL3	siCavin1	Tox+	2	28	3264.77
VOL3	siCavin1	Tox+	2	29	1423.55
VOL3	siCavin1	Tox+	2	30	2135.58
VOL3	siCavin1	Tox+	2	31	2411.22
VOL3	siCavin1	Tox+	2	32	2427
VOL3	siCavin1	Tox+	2	33	1842.5
VOL3	siCavin1	Tox+	2	34	2354.03
VOL3	siCavin1	Tox+	2	35	4322.61
VOL3	siCavin1	Tox+	2	36	3244.71
VOL3	siCavin1	Tox+	2	37	1250.08
VOL3	siCavin1	Tox+	2	38	1059.11
VOL3	siCavin1	Tox+	2	39	920.23
VOL3	siCavin1	Tox+	2	40	1976.35
VOL3	siCavin1	Tox+	2	41	2054.29
VOL3	siCavin1	Tox+	2	42	866.415
VOL3	siCavin1	Tox+	2	43	1687.07
VOL3	siCavin1	Tox+	2	44	1992.15
VOL3	siCavin1	Tox+	2	45	2179.28
VOL3	siCavin1	Tox+	2	46	1796.59
VOL3	siCavin1	Tox+	2	47	2436.51
VOL3	siCavin1	Tox+	2	48	1433.93
VOL3	siCavin1	Tox+	2	49	1019.95
VOL3	siCavin1	Tox+	2	50	3273.57
VOL5	siCAV1	Tox-	1	1	1226.47
VOL5	siCAV1	Tox-	1	2	2515.96
VOL5	siCAV1	Tox-	1	3	2476.29
VOL5	siCAV1	Tox-	1	4	1258.81
VOL5	siCAV1	Tox-	1	5	2968.22
VOL5	siCAV1	Tox-	1	6	2595.7
VOL5	siCAV1	Tox-	1	7	2888.36
VOL5	siCAV1	Tox-	1	8	1906.21
VOL5	siCAV1	Tox-	1	9	2050.43
VOL5	siCAV1	Tox-	1	10	2172.7
VOL5	siCAV1	Tox-	1	11	2771
VOL5	siCAV1	Tox-	1	12	2622.03
VOL5	siCAV1	Tox-	1	13	3386.07
VOL5	siCAV1	Tox-	1	14	3081.63
VOL5	siCAV1	Tox-	1	15	3608.35
VOL5	siCAV1	Tox-	1	16	3891.74
VOL5	siCAV1	Tox-	1	17	3171.34
VOL5	siCAV1	Tox-	1	18	2725.5
VOL5	siCAV1	Tox-	1	19	3868.7
VOL5	siCAV1	Tox-	1	20	3530.76
VOL5	siCAV1	Tox-	1	21	3891.74
VOL5	siCAV1	Tox-	1	22	3171.34
VOL5	siCAV1	Tox-	1	23	2725.5
VOL5	siCAV1	Tox-	1	24	3868.7
VOL5	siCAV1	Tox-	1	25	3530.76
VOL5	siCAV1	Tox-	1	26	3918.47
VOL5	siCAV1	Tox-	1	27	3553.24
VOL5	siCAV1	Tox-	1	28	3089.13
VOL5	siCAV1	Tox-	1	29	3747.91
VOL5	siCAV1	Tox-	1	30	2109.56
VOL5	siCAV1	Tox-	1	31	4399.44
VOL5	siCAV1	Tox-	1	32	3347.56
VOL5	siCAV1	Tox-	1	33	2065.46
VOL5	siCAV1	Tox-	1	34	2226.11
VOL5	siCAV1	Tox-	1	35	4123.32
VOL5	siCAV1	Tox-	1	36	4215.77
VOL5	siCAV1	Tox-	1	37	1430.49
VOL5	siCAV1	Tox-	1	38	1070.69
VOL5	siCAV1	Tox-	1	39	1942.81
VOL5	siCAV1	Tox-	1	40	2811.59
VOL5	siCAV1	Tox-	1	41	2244.14
VOL5	siCAV1	Tox-	1	42	1024
VOL5	siCAV1	Tox-	1	43	1544.29
VOL5	siCAV1	Tox-	1	44	1676.51
VOL5	siCAV1	Tox-	1	45	1454.55
VOL5	siCAV1	Tox-	1	46	3605.25
VOL5	siCAV1	Tox-	1	47	2248.62
VOL5	siCAV1	Tox-	1	48	2395.3
VOL5	siCAV1	Tox-	1	49	2116.63
VOL5	siCAV1	Tox-	1	50	2964.67
VOL5	siCAV1	Tox-	1	51	1171.27
VOL5	siCAV1	Tox-	1	52	1409.16
VOL5	siCAV1	Tox-	1	53	1513.5
VOL5	siCAV1	Tox-	1	54	2161.12
VOL5	siCAV1	Tox-	1	55	1341.82
VOL5	siCAV1	Tox-	1	56	825.337
VOL5	siCAV1	Tox-	1	57	1591.43
VOL5	siCAV1	Tox-	1	58	988.501
VOL5	siCAV1	Tox-	1	59	1238.93
VOL5	siCAV1	Tox-	1	1	2815.58
VOL5	siCAV1	Tox-	1	2	3276.15
VOL5	siCAV1	Tox-	1	3	1507.97
VOL5	siCAV1	Tox-	1	4	2551.25
VOL5	siCAV1	Tox-	1	5	1567.94
VOL5	siCAV1	Tox-	1	6	2278.03
VOL5	siCAV1	Tox-	2	1	2615.44
VOL5	siCAV1	Tox-	2	2	2194.28
VOL5	siCAV1	Tox-	2	3	1829.05
VOL5	siCAV1	Tox-	2	4	1582.27
VOL5	siCAV1	Tox-	2	5	2704.6
VOL5	siCAV1	Tox-	2	6	1836.91
VOL5	siCAV1	Tox-	2	7	2856.68
VOL5	siCAV1	Tox-	2	8	1961.11
VOL5	siCAV1	Tox-	2	9	3215.05
VOL5	siCAV1	Tox-	2	10	2645.5
VOL5	siCAV1	Tox-	2	11	2757.86
VOL5	siCAV1	Tox-	2	12	2177.55
VOL5	siCAV1	Tox-	2	13	2226.64
VOL5	siCAV1	Tox+	1	1	3967.75
VOL5	siCAV1	Tox+	1	2	3548.52
VOL5	siCAV1	Tox+	1	3	2534.93
VOL5	siCAV1	Tox+	1	4	3541.6
VOL5	siCAV1	Tox+	1	5	2762.85
VOL5	siCAV1	Tox+	1	6	3240.35
VOL5	siCAV1	Tox+	1	7	4439.13
VOL5	siCAV1	Tox+	1	8	3552.93
VOL5	siCAV1	Tox+	1	9	2352.86
VOL5	siCAV1	Tox+	1	10	4373.32
VOL5	siCAV1	Tox+	1	11	4722.58
VOL5	siCAV1	Tox+	1	12	2679.38
VOL5	siCAV1	Tox+	1	13	2473.44
VOL5	siCAV1	Tox+	1	14	2710.6
VOL5	siCAV1	Tox+	1	15	3570.79
VOL5	siCAV1	Tox+	1	16	2066.68
VOL5	siCAV1	Tox+	1	17	2470.33
VOL5	siCAV1	Tox+	1	18	2474.53
VOL5	siCAV1	Tox+	1	19	3854.48
VOL5	siCAV1	Tox+	1	20	4053.49
VOL5	siCAV1	Tox+	1	21	2235.86
VOL5	siCAV1	Tox+	1	22	2667.58
VOL5	siCAV1	Tox+	1	23	3682.67
VOL5	siCAV1	Tox+	1	24	4520.55
VOL5	siCAV1	Tox+	1	25	5143.5
VOL5	siCAV1	Tox+	1	26	4435.07
VOL5	siCAV1	Tox+	1	27	3341.67
VOL5	siCAV1	Tox+	1	28	2400.23
VOL5	siCAV1	Tox+	1	29	3168.57
VOL5	siCAV1	Tox+	1	30	4254.05
VOL5	siCAV1	Tox+	1	31	4374.9
VOL5	siCAV1	Tox+	1	32	4258.48
VOL5	siCAV1	Tox+	1	33	2614.08
VOL5	siCAV1	Tox+	1	34	2879.4
VOL5	siCAV1	Tox+	1	35	3764.03
VOL5	siCAV1	Tox+	1	36	4355.26
VOL5	siCAV1	Tox+	1	37	3408.17
VOL5	siCAV1	Tox+	1	38	3846.88
VOL5	siCAV1	Tox+	1	39	2125.58
VOL5	siCAV1	Tox+	1	40	2107.29
VOL5	siCAV1	Tox+	1	41	2045.97
VOL5	siCAV1	Tox+	1	42	3451.24
VOL5	siCAV1	Tox+	1	43	2440.37
VOL5	siCAV1	Tox+	1	44	2375.77
VOL5	siCAV1	Tox+	1	45	2613.46
VOL5	siCAV1	Tox+	2	1	2572.32
VOL5	siCAV1	Tox+	2	2	3130.01
VOL5	siCAV1	Tox+	2	3	2583.92
VOL5	siCAV1	Tox+	2	4	3323.94
VOL5	siCAV1	Tox+	2	5	2565.93
VOL5	siCAV1	Tox+	2	6	2431.05
VOL5	siCAV1	Tox+	2	7	3432.21
VOL5	siCAV1	Tox+	2	8	3124.2
VOL5	siCAV1	Tox+	2	9	2811.16
VOL5	siCAV1	Tox+	2	10	3268.46
VOL5	siCAV1	Tox+	2	11	2041.2
VOL5	siCAV1	Tox+	2	12	2203.16
VOL5	siCAV1	Tox+	2	13	3373.65
VOL5	siCAV1	Tox+	2	14	2279.61
VOL5	siCAV1	Tox+	2	15	1972.5
VOL5	siCAV1	Tox+	2	16	2851.06
VOL5	siCAV1	Tox+	2	17	2979.96
VOL5	siCAV1	Tox+	2	18	3048.55
VOL5	siCAV1	Tox+	2	19	3324.93
VOL5	siCAV1	Tox+	2	20	3424.44
VOL5	siCAV1	Tox+	2	21	2112.13
VOL5	siCAV1	Tox+	2	22	2168.91
VOL5	siCAV1	Tox+	2	23	2226.84
VOL5	siCAV1	Tox+	2	24	2038.26
VOL5	siCAV1	Tox+	2	25	2901.02
VOL5	siCAV1	Tox+	2	26	2591.7
VOL5	siCAV1	Tox+	2	27	3333.71
VOL5	siCAV1	Tox+	2	28	4108.38
VOL5	siCAV1	Tox+	2	29	3905.16
VOL5	siCAV1	Tox+	2	30	2825.31
VOL5	siCAV1	Tox+	2	31	2888.89
VOL5	siCAV1	Tox+	2	32	2554.85
VOL5	siCAV1	Tox+	2	33	2776.84
VOL5	siCAV1	Tox+	2	34	3002.3
VOL5	siCAV1	Tox+	2	35	2648.5
VOL5	siCAV1	Tox+	2	36	1722.55
VOL5	siCAV1	Tox+	2	37	2833.74
VOL5	siCAV1	Tox+	2	38	2919.87
VOL5	siCAV1	Tox+	2	39	3094.12
VOL5	siCAV1	Tox+	2	40	2898.13
VOL5	siCAV1	Tox+	2	41	4430.56
VOL5	siCAV1	Tox+	2	42	2479.38
VOL5	siCAV1	Tox+	2	43	4376.7
VOL5	siCAV1	Tox+	2	44	4420.8
VOL5	siCAV1	Tox+	2	45	2788.56
VOL5	siCAV1	Tox+	2	46	2596.31
VOL5	siCAV1	Tox+	2	47	1633.6
VOL5	siCAV1	Tox+	2	48	1773.67
VOL5	siCAV1	Tox+	2	49	2404.27
VOL5	siCAV1	Tox+	2	50	3387.67
VOL5	siCAV1	Tox+	2	51	2446.98
VOL5	siCAV1	Tox+	2	52	2858.37
VOL5	siCAV1	Tox+	2	53	2957.51
VOL5	siCAV1	Tox+	2	54	3271.06
VOL5	siCAV1	Tox+	2	55	2422.38
VOL5	siCAV1	Tox+	2	56	5171.68
VOL5	siCAV1	Tox+	2	57	2588.69
VOL5	siCTRL	Tox-	1	1	2980.68
VOL5	siCTRL	Tox-	1	2	1508.12
VOL5	siCTRL	Tox-	1	3	3086.54
VOL5	siCTRL	Tox-	1	4	3989.94
VOL5	siCTRL	Tox-	1	5	2643.47
VOL5	siCTRL	Tox-	1	6	3602.23
VOL5	siCTRL	Tox-	1	7	2133.18
VOL5	siCTRL	Tox-	1	8	3960.13
VOL5	siCTRL	Tox-	1	9	1957.21
VOL5	siCTRL	Tox-	1	10	2753.28
VOL5	siCTRL	Tox-	1	11	4039.1
VOL5	siCTRL	Tox-	1	12	3602.23
VOL5	siCTRL	Tox-	1	13	2133.18
VOL5	siCTRL	Tox-	1	14	3960.13
VOL5	siCTRL	Tox-	1	15	1957.21
VOL5	siCTRL	Tox-	1	16	2753.28
VOL5	siCTRL	Tox-	1	17	4039.1
VOL5	siCTRL	Tox-	1	18	2934.19
VOL5	siCTRL	Tox-	1	19	2722.76
VOL5	siCTRL	Tox-	1	20	3094.68
VOL5	siCTRL	Tox-	1	21	3306.04
VOL5	siCTRL	Tox-	1	22	3530.11
VOL5	siCTRL	Tox-	1	23	1961
VOL5	siCTRL	Tox-	1	24	3549.83
VOL5	siCTRL	Tox-	1	25	2006.74
VOL5	siCTRL	Tox-	1	26	1883.13
VOL5	siCTRL	Tox-	1	27	1747.54
VOL5	siCTRL	Tox-	1	28	2574.18
VOL5	siCTRL	Tox-	1	29	3067.79
VOL5	siCTRL	Tox-	1	30	3784.07
VOL5	siCTRL	Tox-	1	31	4362.12
VOL5	siCTRL	Tox-	1	32	3269.83
VOL5	siCTRL	Tox-	1	33	3239.13
VOL5	siCTRL	Tox-	1	34	2488.95
VOL5	siCTRL	Tox-	1	35	2669.97
VOL5	siCTRL	Tox-	1	36	3335.47
VOL5	siCTRL	Tox-	1	37	4183.13
VOL5	siCTRL	Tox-	1	38	3234.54
VOL5	siCTRL	Tox-	1	39	2126.89
VOL5	siCTRL	Tox-	1	40	3074.06
VOL5	siCTRL	Tox-	1	41	2381.12
VOL5	siCTRL	Tox-	1	42	2379.32
VOL5	siCTRL	Tox-	1	43	1423.53
VOL5	siCTRL	Tox-	1	44	1865.01
VOL5	siCTRL	Tox-	1	45	1670.54
VOL5	siCTRL	Tox-	1	46	3918.97
VOL5	siCTRL	Tox-	1	47	1153.85
VOL5	siCTRL	Tox-	1	48	1989.65
VOL5	siCTRL	Tox-	1	49	2216.35
VOL5	siCTRL	Tox-	1	50	1241.66
VOL5	siCTRL	Tox-	1	51	3257.9
VOL5	siCTRL	Tox-	1	52	1753.25
VOL5	siCTRL	Tox-	1	53	3145.52
VOL5	siCTRL	Tox-	1	54	2721.35
VOL5	siCTRL	Tox-	1	55	2241.66
VOL5	siCTRL	Tox-	1	56	2772.78
VOL5	siCTRL	Tox-	1	57	2403.71
VOL5	siCTRL	Tox-	1	58	2670.49
VOL5	siCTRL	Tox-	1	59	961.359
VOL5	siCTRL	Tox-	1	60	1194.67
VOL5	siCTRL	Tox-	1	61	2190.53
VOL5	siCTRL	Tox-	1	62	2412
VOL5	siCTRL	Tox-	1	63	1390.39
VOL5	siCTRL	Tox-	1	64	2015.95
VOL5	siCTRL	Tox-	1	65	2279.43
VOL5	siCTRL	Tox-	1	66	3179
VOL5	siCTRL	Tox-	1	67	2198.22
VOL5	siCTRL	Tox-	1	68	1860.39
VOL5	siCTRL	Tox-	1	69	3702.6
VOL5	siCTRL	Tox-	1	70	2597.39
VOL5	siCTRL	Tox-	1	71	3671.5
VOL5	siCTRL	Tox-	1	72	3859.97
VOL5	siCTRL	Tox-	1	73	2465.96
VOL5	siCTRL	Tox-	1	74	2466.53
VOL5	siCTRL	Tox-	1	75	2747.43
VOL5	siCTRL	Tox-	1	76	2579.44
VOL5	siCTRL	Tox-	1	77	2898.27
VOL5	siCTRL	Tox-	1	78	2437.96
VOL5	siCTRL	Tox-	1	79	1860.69
VOL5	siCTRL	Tox-	1	80	2345.14
VOL5	siCTRL	Tox-	1	81	2149.67
VOL5	siCTRL	Tox-	1	82	1558.83
VOL5	siCTRL	Tox-	1	83	3218.08
VOL5	siCTRL	Tox-	1	84	2010.72
VOL5	siCTRL	Tox-	1	85	2041.46
VOL5	siCTRL	Tox-	1	86	1171.27
VOL5	siCTRL	Tox-	1	87	2522.56
VOL5	siCTRL	Tox-	1	88	3238.02
VOL5	siCTRL	Tox-	1	89	1378.32
VOL5	siCTRL	Tox-	1	90	2032.26
VOL5	siCTRL	Tox-	1	91	2152.55
VOL5	siCTRL	Tox-	1	92	2389.57
VOL5	siCTRL	Tox-	1	93	3190.9
VOL5	siCTRL	Tox-	1	94	3195.4
VOL5	siCTRL	Tox-	1	95	3658.15
VOL5	siCTRL	Tox-	1	96	2649.64
VOL5	siCTRL	Tox+	1	1	3018.45
VOL5	siCTRL	Tox+	1	2	2559.7
VOL5	siCTRL	Tox+	1	3	2644.03
VOL5	siCTRL	Tox+	1	4	2457.33
VOL5	siCTRL	Tox+	1	5	3648.5
VOL5	siCTRL	Tox+	1	6	2214.43
VOL5	siCTRL	Tox+	1	7	3979.33
VOL5	siCTRL	Tox+	1	8	2349.03
VOL5	siCTRL	Tox+	1	9	2102.37
VOL5	siCTRL	Tox+	1	10	2896.94
VOL5	siCTRL	Tox+	1	11	2784.44
VOL5	siCTRL	Tox+	1	12	2289.78
VOL5	siCTRL	Tox+	1	13	2621.31
VOL5	siCTRL	Tox+	1	14	3151.96
VOL5	siCTRL	Tox+	1	15	2134.33
VOL5	siCTRL	Tox+	1	16	4564.38
VOL5	siCTRL	Tox+	1	17	2407.63
VOL5	siCTRL	Tox+	1	18	2422.06
VOL5	siCTRL	Tox+	1	19	1921.8
VOL5	siCTRL	Tox+	1	20	2489.17
VOL5	siCTRL	Tox+	1	21	1779.7
VOL5	siCTRL	Tox+	1	22	4489.81
VOL5	siCTRL	Tox+	1	23	2356.8
VOL5	siCTRL	Tox+	1	24	1809.59
VOL5	siCTRL	Tox+	1	25	4694.57
VOL5	siCTRL	Tox+	1	26	2099.17
VOL5	siCTRL	Tox+	1	27	2732.11
VOL5	siCTRL	Tox+	1	28	1585.84
VOL5	siCTRL	Tox+	1	29	3037.95
VOL5	siCTRL	Tox+	1	30	3113
VOL5	siCTRL	Tox+	1	31	2375.15
VOL5	siCTRL	Tox+	1	32	2749.65
VOL5	siCTRL	Tox+	1	33	3433.88
VOL5	siCTRL	Tox+	1	34	3126.75
VOL5	siCTRL	Tox+	1	35	2650.79
VOL5	siCTRL	Tox+	1	36	2443.56
VOL5	siCTRL	Tox+	1	37	2790.13
VOL5	siCTRL	Tox+	1	38	4231.87
VOL5	siCTRL	Tox+	1	39	3264.07
VOL5	siCTRL	Tox+	1	40	2518.43
VOL5	siCTRL	Tox+	1	41	2501.37
VOL5	siCTRL	Tox+	1	42	2486.58
VOL5	siCTRL	Tox+	1	43	3453.7
VOL5	siCTRL	Tox+	1	44	2679.67
VOL5	siCTRL	Tox+	1	45	3934.45
VOL5	siCTRL	Tox+	1	46	2647.64
VOL5	siCTRL	Tox+	1	47	2892.54
VOL5	siCTRL	Tox+	1	48	2852.47
VOL5	siCTRL	Tox+	1	49	4238.91
VOL5	siCTRL	Tox+	1	50	2697.69
VOL5	siCTRL	Tox+	1	51	3409.92
VOL5	siCTRL	Tox+	1	52	4324.71
VOL5	siCTRL	Tox+	1	53	2956.96
VOL5	siCTRL	Tox+	1	54	3642.96
VOL5	siCTRL	Tox+	1	55	2325.53
VOL5	siCTRL	Tox+	1	56	2729.92
VOL5	siCTRL	Tox+	1	57	4375.61
VOL5	siCTRL	Tox+	1	58	3506.26
VOL5	siCTRL	Tox+	1	59	2424.03
VOL5	siCTRL	Tox+	1	60	4830.74
VOL5	siCTRL	Tox+	1	61	1557.39
VOL5	siCTRL	Tox+	1	62	1960.96
VOL5	siCTRL	Tox+	1	63	2418.5
VOL5	siCTRL	Tox+	1	64	3207.59
VOL5	siCTRL	Tox+	1	65	6591.18
VOL5	siCTRL	Tox+	1	66	2389.79
VOL5	siCTRL	Tox+	1	67	2112.81
VOL5	siCTRL	Tox+	1	68	1817.2
VOL5	siCTRL	Tox+	1	69	2318.86
VOL5	siCTRL	Tox+	1	70	3184.56
VOL5	siCTRL	Tox+	1	71	3190.83
VOL5	siCTRL	Tox+	1	72	3797.77
VOL5	siCTRL	Tox+	1	73	2542.71
VOL5	siCTRL	Tox+	1	74	2826.86
VOL5	siCTRL	Tox+	1	75	3041
VOL5	siCTRL	Tox+	1	76	3500.8
VOL5	siCTRL	Tox+	1	77	2757.47
VOL5	siCTRL	Tox+	1	78	2654.97
VOL5	siCTRL	Tox+	1	79	4182.8
VOL5	siCTRL	Tox+	1	80	2274.87
VOL5	siCTRL	Tox+	1	81	3635.3
VOL5	siCTRL	Tox+	1	82	3895.93
VOL5	siCTRL	Tox+	1	83	3123.63
VOL5	siCTRL	Tox+	1	84	4492.6
VOL5	siCTRL	Tox+	1	85	3565.33
VOL5	siCTRL	Tox+	1	86	3759.53
VOL5	siCTRL	Tox+	1	87	2678.79
VOL5	siCTRL	Tox+	1	88	2852.79
VOL5	siCTRL	Tox+	1	89	3189.99
VOL5	siCTRL	Tox+	2	1	2575.23
VOL5	siCTRL	Tox+	2	2	3460.81
VOL5	siCTRL	Tox+	2	3	3236.01
VOL5	siCTRL	Tox+	2	4	3069.7
VOL5	siCTRL	Tox+	2	5	2089.87
VOL5	siCTRL	Tox+	2	6	4586.61
VOL5	siCTRL	Tox+	2	7	2678.77
VOL5	siCTRL	Tox+	2	8	3015.24
VOL5	siCTRL	Tox+	2	9	3316.45
VOL5	siCTRL	Tox+	2	10	2363.68
VOL5	siCTRL	Tox+	2	11	3725.59
VOL5	siCTRL	Tox+	2	12	2116.3
VOL5	siCTRL	Tox+	2	13	3453
VOL5	siCTRL	Tox+	2	14	3434.76
VOL5	siCTRL	Tox+	2	15	2569.35
VOL5	siCTRL	Tox+	2	16	4013.74
VOL5	siCTRL	Tox+	2	17	2282.83
VOL5	siCTRL	Tox+	2	18	2452.67
VOL5	siCTRL	Tox+	2	19	3097.34
VOL5	siCTRL	Tox+	2	20	3223.83
VOL5	siCTRL	Tox+	2	21	4265.26
VOL5	siCTRL	Tox+	2	22	4280.52
VOL5	siCTRL	Tox+	2	23	3173.64
VOL5	siCTRL	Tox+	2	24	2565.68
VOL5	siCTRL	Tox+	2	25	2082.02
VOL5	siCTRL	Tox+	2	26	2388.48
VOL5	siCTRL	Tox+	2	27	4764.11
VOL5	siCTRL	Tox+	2	28	5150.39
VOL5	siCTRL	Tox+	2	29	3953.3
VOL5	siCTRL	Tox+	2	30	2255.54
VOL5	siCTRL	Tox+	2	31	4892.5
VOL5	siCTRL	Tox+	2	32	2454.89
VOL5	siCTRL	Tox+	2	33	3879.56
VOL5	siCavin1	Tox-	1	1	1608.71
VOL5	siCavin1	Tox-	1	2	1398.19
VOL5	siCavin1	Tox-	1	3	2045.19
VOL5	siCavin1	Tox-	1	4	1808.14
VOL5	siCavin1	Tox-	1	5	2634.72
VOL5	siCavin1	Tox-	1	6	1697.26
VOL5	siCavin1	Tox-	1	7	1735.81
VOL5	siCavin1	Tox-	1	8	2748.81
VOL5	siCavin1	Tox-	1	9	2589.57
VOL5	siCavin1	Tox-	1	10	3049.53
VOL5	siCavin1	Tox-	1	11	1978.92
VOL5	siCavin1	Tox-	1	12	2581.85
VOL5	siCavin1	Tox-	1	13	2799.36
VOL5	siCavin1	Tox-	1	14	1943.11
VOL5	siCavin1	Tox-	1	15	2679.96
VOL5	siCavin1	Tox-	1	16	1435.41
VOL5	siCavin1	Tox-	1	17	2070.85
VOL5	siCavin1	Tox-	1	18	1641.75
VOL5	siCavin1	Tox-	1	19	1931.86
VOL5	siCavin1	Tox-	1	20	1543.2
VOL5	siCavin1	Tox-	1	21	1306.21
VOL5	siCavin1	Tox-	1	22	3903.76
VOL5	siCavin1	Tox-	1	23	2773.56
VOL5	siCavin1	Tox-	1	24	2549.97
VOL5	siCavin1	Tox-	1	25	4317.6
VOL5	siCavin1	Tox-	1	26	2567.14
VOL5	siCavin1	Tox-	1	27	2370.93
VOL5	siCavin1	Tox-	1	28	1832.11
VOL5	siCavin1	Tox-	1	29	2122.56
VOL5	siCavin1	Tox-	1	30	2600.45
VOL5	siCavin1	Tox-	1	31	2987.92
VOL5	siCavin1	Tox-	1	32	1697.02
VOL5	siCavin1	Tox-	1	33	1065.94
VOL5	siCavin1	Tox-	1	34	2972.32
VOL5	siCavin1	Tox-	1	35	3234.58
VOL5	siCavin1	Tox-	1	36	1463.79
VOL5	siCavin1	Tox-	2	1	2054.86
VOL5	siCavin1	Tox-	2	2	1895.66
VOL5	siCavin1	Tox-	2	3	1942.23
VOL5	siCavin1	Tox-	2	4	1648.32
VOL5	siCavin1	Tox-	2	5	1909.67
VOL5	siCavin1	Tox-	2	6	3453.45
VOL5	siCavin1	Tox-	2	7	2376.15
VOL5	siCavin1	Tox-	2	8	2435.03
VOL5	siCavin1	Tox-	2	9	2955.52
VOL5	siCavin1	Tox-	2	10	4522.06
VOL5	siCavin1	Tox-	2	11	2589.18
VOL5	siCavin1	Tox-	2	12	2555.58
VOL5	siCavin1	Tox+	1	1	2798.33
VOL5	siCavin1	Tox+	1	2	2490.58
VOL5	siCavin1	Tox+	1	3	2534.26
VOL5	siCavin1	Tox+	1	4	3358.65
VOL5	siCavin1	Tox+	1	5	2801.11
VOL5	siCavin1	Tox+	1	6	2453.91
VOL5	siCavin1	Tox+	1	7	2004.15
VOL5	siCavin1	Tox+	1	8	2677.09
VOL5	siCavin1	Tox+	1	9	2814.41
VOL5	siCavin1	Tox+	1	10	3059.38
VOL5	siCavin1	Tox+	1	11	5166.12
VOL5	siCavin1	Tox+	1	12	3004.53
VOL5	siCavin1	Tox+	1	13	3841.85
VOL5	siCavin1	Tox+	1	14	3612.43
VOL5	siCavin1	Tox+	1	15	3201
VOL5	siCavin1	Tox+	1	16	2105.05
VOL5	siCavin1	Tox+	1	17	2039.21
VOL5	siCavin1	Tox+	1	18	2442.83
VOL5	siCavin1	Tox+	1	19	2945.81
VOL5	siCavin1	Tox+	1	20	2731.76
VOL5	siCavin1	Tox+	1	21	1619.4
VOL5	siCavin1	Tox+	1	22	1925.47
VOL5	siCavin1	Tox+	1	23	2790.66
VOL5	siCavin1	Tox+	1	24	2952.08
VOL5	siCavin1	Tox+	1	25	2926.21
VOL5	siCavin1	Tox+	1	26	3518.62
VOL5	siCavin1	Tox+	1	27	3395.07
VOL5	siCavin1	Tox+	1	28	3553.6
VOL5	siCavin1	Tox+	1	29	3386.18
VOL5	siCavin1	Tox+	1	30	2050.42
VOL5	siCavin1	Tox+	1	31	1769.71
VOL5	siCavin1	Tox+	1	32	2151.13
VOL5	siCavin1	Tox+	1	33	2321.32
VOL5	siCavin1	Tox+	1	34	1697.68
VOL5	siCavin1	Tox+	1	35	1527.53
VOL5	siCavin1	Tox+	1	36	1719.52
VOL5	siCavin1	Tox+	1	37	1752.52
VOL5	siCavin1	Tox+	1	38	1500.35
VOL5	siCavin1	Tox+	1	39	2260.4
VOL5	siCavin1	Tox+	1	40	2872.22
VOL5	siCavin1	Tox+	1	41	2791.46
VOL5	siCavin1	Tox+	1	42	2711.2
VOL5	siCavin1	Tox+	1	43	2720.65
VOL5	siCavin1	Tox+	1	44	3155.01
VOL5	siCavin1	Tox+	1	45	2886.82
VOL5	siCavin1	Tox+	1	46	1730.21
VOL5	siCavin1	Tox+	1	47	2994.71
VOL5	siCavin1	Tox+	1	48	3164.68
VOL5	siCavin1	Tox+	1	49	2664.32
VOL5	siCavin1	Tox+	1	50	2206.19
VOL5	siCavin1	Tox+	1	51	2135.84
VOL5	siCavin1	Tox+	1	52	2321.48
VOL5	siCavin1	Tox+	1	53	2755.43
VOL5	siCavin1	Tox+	1	54	2295.81
VOL5	siCavin1	Tox+	1	55	2111.37
VOL5	siCavin1	Tox+	1	56	2706.43
VOL5	siCavin1	Tox+	1	57	1733.37
VOL5	siCavin1	Tox+	1	58	3040.61
VOL5	siCavin1	Tox+	1	59	3055.7
VOL5	siCavin1	Tox+	1	60	2154.79
VOL5	siCavin1	Tox+	1	61	2235.68
VOL5	siCavin1	Tox+	1	62	3063.6
