# Supplementary material for: Caveolin-1 protects endothelial cells from extensive expansion of transcellular tunnel by stiffening the plasma membrane
Source: eLife. 2024 Mar 22;12:RP92078. doi: 10.7554/eLife.92078 (PMC10959525; doi:10.7554/eLife.92078)
Supplement: Figure 4—source data 1. [file elife-92078-fig4-data1.xlsx]

## Sheet: Figure 4B 
TEM	Experiment	Cell.ID	TEM.ID	Area	Condition
siCTRL_Area_CAV4.1_001	CAV4	1	001	16	siCTRL
siCTRL_Area_CAV4.1_002	CAV4	1	002	16	siCTRL
siCTRL_Area_CAV4.1_003	CAV4	1	003	16	siCTRL
siCTRL_Area_CAV4.1_004	CAV4	1	004	16	siCTRL
siCTRL_Area_CAV4.1_005	CAV4	1	005	16	siCTRL
siCTRL_Area_CAV4.1_006	CAV4	1	006	16	siCTRL
siCTRL_Area_CAV4.1_007	CAV4	1	007	16	siCTRL
siCTRL_Area_CAV4.1_008	CAV4	1	008	16	siCTRL
siCTRL_Area_CAV4.1_009	CAV4	1	009	16	siCTRL
siCTRL_Area_CAV4.1_010	CAV4	1	010	16	siCTRL
siCTRL_Area_CAV4.1_011	CAV4	1	011	16	siCTRL
siCTRL_Area_CAV4.1_012	CAV4	1	012	16	siCTRL
siCTRL_Area_CAV4.1_013	CAV4	1	013	16	siCTRL
siCTRL_Area_CAV4.1_014	CAV4	1	014	16	siCTRL
siCTRL_Area_CAV4.1_015	CAV4	1	015	6.35938	siCTRL
siCTRL_Area_CAV4.1_016	CAV4	1	016	4.17188	siCTRL
siCTRL_Area_CAV4.1_017	CAV4	1	017	21.7812	siCTRL
siCTRL_Area_CAV4.1_018	CAV4	1	018	10	siCTRL
siCTRL_Area_CAV4.1_019	CAV4	1	019	11.7812	siCTRL
siCTRL_Area_CAV4.1_020	CAV4	1	020	7.53125	siCTRL
siCTRL_Area_CAV4.1_021	CAV4	1	021	7.46875	siCTRL
siCTRL_Area_CAV4.1_022	CAV4	1	022	7	siCTRL
siCTRL_Area_CAV4.1_023	CAV4	1	023	6.1875	siCTRL
siCTRL_Area_CAV4.1_024	CAV4	1	024	6	siCTRL
siCTRL_Area_CAV4.1_025	CAV4	1	025	7.90625	siCTRL
siCTRL_Area_CAV4.1_026	CAV4	1	026	10.7656	siCTRL
siCTRL_Area_CAV4.1_027	CAV4	1	027	8.01562	siCTRL
siCTRL_Area_CAV4.1_028	CAV4	1	028	3.84375	siCTRL
siCTRL_Area_CAV4.1_029	CAV4	1	029	10.2656	siCTRL
siCTRL_Area_CAV4.1_030	CAV4	1	030	42.1094	siCTRL
siCTRL_Area_CAV4.1_031	CAV4	1	031	10.7969	siCTRL
siCTRL_Area_CAV4.1_032	CAV4	1	032	10.4062	siCTRL
siCTRL_Area_CAV4.1_033	CAV4	1	033	12.8281	siCTRL
siCTRL_Area_CAV4.1_034	CAV4	1	034	5.32812	siCTRL
siCTRL_Area_CAV4.1_035	CAV4	1	035	14.1406	siCTRL
siCTRL_Area_CAV4.1_036	CAV4	1	036	8.42188	siCTRL
siCTRL_Area_CAV4.1_037	CAV4	1	037	11.6562	siCTRL
siCTRL_Area_CAV4.1_038	CAV4	1	038	5.40625	siCTRL
siCTRL_Area_CAV4.2_039	CAV4	2	039	2.89062	siCTRL
siCTRL_Area_CAV4.2_040	CAV4	2	040	4.09375	siCTRL
siCTRL_Area_CAV4.2_041	CAV4	2	041	22.0469	siCTRL
siCTRL_Area_CAV4.2_042	CAV4	2	042	1.71875	siCTRL
siCTRL_Area_CAV4.2_043	CAV4	2	043	2.53125	siCTRL
siCTRL_Area_CAV4.2_044	CAV4	2	044	21.4219	siCTRL
siCTRL_Area_CAV4.2_045	CAV4	2	045	1.65625	siCTRL
siCTRL_Area_CAV4.2_046	CAV4	2	046	27.7031	siCTRL
siCTRL_Area_CAV4.2_047	CAV4	2	047	1.70312	siCTRL
siCTRL_Area_CAV4.2_048	CAV4	2	048	7.01562	siCTRL
siCTRL_Area_CAV4.2_049	CAV4	2	049	11.3906	siCTRL
siCTRL_Area_CAV4.2_050	CAV4	2	050	8.59375	siCTRL
siCTRL_Area_CAV4.2_051	CAV4	2	051	4.39062	siCTRL
siCTRL_Area_CAV4.2_052	CAV4	2	052	10.0312	siCTRL
siCTRL_Area_CAV4.2_053	CAV4	2	053	11.5781	siCTRL
siCTRL_Area_CAV4.2_054	CAV4	2	054	12.4844	siCTRL
siCTRL_Area_CAV4.2_055	CAV4	2	055	6.0625	siCTRL
siCTRL_Area_CAV4.2_056	CAV4	2	056	2.5	siCTRL
siCTRL_Area_CAV4.2_057	CAV4	2	057	2.71875	siCTRL
siCTRL_Area_CAV4.2_058	CAV4	2	058	14.875	siCTRL
siCTRL_Area_CAV4.2_059	CAV4	2	059	3.125	siCTRL
siCTRL_Area_CAV4.2_060	CAV4	2	060	1.70312	siCTRL
siCTRL_Area_CAV4.2_061	CAV4	2	061	1.73438	siCTRL
siCTRL_Area_CAV4.2_062	CAV4	2	062	11.3438	siCTRL
siCTRL_Area_CAV4.2_063	CAV4	2	063	2.40625	siCTRL
siCTRL_Area_CAV4.2_064	CAV4	2	064	8.14062	siCTRL
siCTRL_Area_CAV4.2_065	CAV4	2	065	5.09375	siCTRL
siCTRL_Area_CAV4.2_066	CAV4	2	066	4.1875	siCTRL
siCTRL_Area_CAV4.2_067	CAV4	2	067	3.98438	siCTRL
siCTRL_Area_CAV14.1_068	CAV14	1	068	9.29688	siCTRL
siCTRL_Area_CAV14.1_069	CAV14	1	069	20.3906	siCTRL
siCTRL_Area_CAV14.1_070	CAV14	1	070	11.5	siCTRL
siCTRL_Area_CAV14.2_071	CAV14	2	071	6.70312	siCTRL
siCTRL_Area_CAV14.2_072	CAV14	2	072	3.25	siCTRL
siCTRL_Area_CAV14.2_073	CAV14	2	073	4.0625	siCTRL
siCTRL_Area_CAV14.2_074	CAV14	2	074	3.82812	siCTRL
siCTRL_Area_CAV14.2_075	CAV14	2	075	10.6562	siCTRL
siCTRL_Area_CAV14.2_076	CAV14	2	076	9.54688	siCTRL
siCTRL_Area_CAV14.2_077	CAV14	2	077	8.5625	siCTRL
siCTRL_Area_CAV14.2_078	CAV14	2	078	2.98438	siCTRL
siCTRL_Area_CAV14.2_079	CAV14	2	079	6.64062	siCTRL
siCTRL_Area_CAV14.2_080	CAV14	2	080	5.84375	siCTRL
siCTRL_Area_CAV14.2_081	CAV14	2	081	7.64062	siCTRL
siCTRL_Area_CAV14.2_082	CAV14	2	082	3.04688	siCTRL
siCTRL_Area_CAV14.2_083	CAV14	2	083	4.32812	siCTRL
siCTRL_Area_CAV14.2_084	CAV14	2	084	15.4062	siCTRL
siCTRL_Area_CAV14.2_085	CAV14	2	085	8.95312	siCTRL
siCTRL_Area_CAV14.2_086	CAV14	2	086	8.125	siCTRL
siCTRL_Area_CAV14.2_087	CAV14	2	087	2.625	siCTRL
siCTRL_Area_CAV14.2_088	CAV14	2	088	4.51562	siCTRL
siCTRL_Area_CAV14.2_089	CAV14	2	089	3.17188	siCTRL
siCTRL_Area_CAV15b.195F1_090	CAV15b	195F1	090	26.9062	siCTRL
siCTRL_Area_CAV15b.195F2_091	CAV15b	195F2	091	16.7812	siCTRL
siCTRL_Area_CAV15b.195F2_092	CAV15b	195F2	092	7.26562	siCTRL
siCTRL_Area_CAV15b.195F2_093	CAV15b	195F2	093	7.3125	siCTRL
siCTRL_Area_CAV15b.195F2_094	CAV15b	195F2	094	61.4688	siCTRL
siCTRL_Area_CAV15b.275F_095	CAV15b	275F	095	10.6719	siCTRL
siCTRL_Area_CAV15b.275F_096	CAV15b	275F	096	17.4219	siCTRL
siCTRL_Area_CAV15b.275F_097	CAV15b	275F	097	15.7344	siCTRL
siCTRL_Area_CAV15b.275F_098	CAV15b	275F	098	10.0312	siCTRL
siCTRL_Area_CAV15b.275F_099	CAV15b	275F	099	9.14062	siCTRL
siCTRL_Area_CAV15b.275F_100	CAV15b	275F	100	8.875	siCTRL
siCTRL_Area_CAV15b.275F_101	CAV15b	275F	101	5.5	siCTRL
siCTRL_Area_CAV15b.275F_102	CAV15b	275F	102	7.95312	siCTRL
siCTRL_Area_CAV15b.275F_103	CAV15b	275F	103	11.2969	siCTRL
siCTRL_Area_CAV15b.275F_104	CAV15b	275F	104	8.82812	siCTRL
siCTRL_Area_CAV15b.275F_105	CAV15b	275F	105	52.1719	siCTRL
siCTRL_Area_CAV15b.275F_106	CAV15b	275F	106	8.57812	siCTRL
siCTRL_Area_CAV15b.275F_107	CAV15b	275F	107	9.5625	siCTRL
siCTRL_Area_CAV15b.275F_108	CAV15b	275F	108	7	siCTRL
siCTRL_Area_CAV15b.275F_109	CAV15b	275F	109	7.48438	siCTRL
siCTRL_Area_CAV15b.275F_110	CAV15b	275F	110	13.25	siCTRL
siCTRL_Area_CAV15b.275F_111	CAV15b	275F	111	10.5625	siCTRL
siCTRL_Area_CAV15b.275F_112	CAV15b	275F	112	6.42188	siCTRL
siCTRL_Area_CAV15b.275F_113	CAV15b	275F	113	9.71875	siCTRL
siCTRL_Area_CAV15b.275F_114	CAV15b	275F	114	35.6094	siCTRL
siCTRL_Area_CAV15b.275F_115	CAV15b	275F	115	15.2031	siCTRL
siCTRL_Area_CAV15b.275F_116	CAV15b	275F	116	19.1406	siCTRL
siCAV1_Area_CAV4.1_001	CAV4	1	001	23.75	siCAV1
siCAV1_Area_CAV4.1_002	CAV4	1	002	6.89062	siCAV1
siCAV1_Area_CAV4.1_003	CAV4	1	003	129.312	siCAV1
siCAV1_Area_CAV4.1_004	CAV4	1	004	3.04806	siCAV1
siCAV1_Area_CAV4.1_005	CAV4	1	005	62.7188	siCAV1
siCAV1_Area_CAV4.1_006	CAV4	1	006	442.438	siCAV1
siCAV1_Area_CAV4.1_007	CAV4	1	007	13.3438	siCAV1
siCAV1_Area_CAV4.1_008	CAV4	1	008	112.562	siCAV1
siCAV1_Area_CAV4.1_009	CAV4	1	009	41.5625	siCAV1
siCAV1_Area_CAV4.1_010	CAV4	1	010	144.594	siCAV1
siCAV1_Area_CAV4.1_011	CAV4	1	011	16.1094	siCAV1
siCAV1_Area_CAV4.1_012	CAV4	1	012	7.04688	siCAV1
siCAV1_Area_CAV4.1_013	CAV4	1	013	6.375	siCAV1
siCAV1_Area_CAV4.1_014	CAV4	1	014	392.672	siCAV1
siCAV1_Area_CAV4.1_015	CAV4	1	015	11.2188	siCAV1
siCAV1_Area_CAV4.1_016	CAV4	1	016	45.9219	siCAV1
siCAV1_Area_CAV4.1_017	CAV4	1	017	12.625	siCAV1
siCAV1_Area_CAV4.1_018	CAV4	1	018	58.8594	siCAV1
siCAV1_Area_CAV4.1_019	CAV4	1	019	51.5625	siCAV1
siCAV1_Area_CAV4.1_020	CAV4	1	020	64.25	siCAV1
siCAV1_Area_CAV4.1_021	CAV4	1	021	108.297	siCAV1
siCAV1_Area_CAV4.1_022	CAV4	1	022	21.4531	siCAV1
siCAV1_Area_CAV4.1_023	CAV4	1	023	19.7969	siCAV1
siCAV1_Area_CAV4.1_024	CAV4	1	024	217.328	siCAV1
siCAV1_Area_CAV4.1_025	CAV4	1	025	8.9375	siCAV1
siCAV1_Area_CAV4.1_026	CAV4	1	026	35.7344	siCAV1
siCAV1_Area_CAV4.1_027	CAV4	1	027	9.46875	siCAV1
siCAV1_Area_CAV4.1_028	CAV4	1	028	110.016	siCAV1
siCAV1_Area_CAV4.1_029	CAV4	1	029	11.1406	siCAV1
siCAV1_Area_CAV4.1_030	CAV4	1	030	181.844	siCAV1
siCAV1_Area_CAV4.1_031	CAV4	1	031	6.15625	siCAV1
siCAV1_Area_CAV4.1_032	CAV4	1	032	40.4844	siCAV1
siCAV1_Area_CAV4.1_033	CAV4	1	033	4.8125	siCAV1
siCAV1_Area_CAV4.1_034	CAV4	1	034	31.2344	siCAV1
siCAV1_Area_CAV4.1_035	CAV4	1	035	22.25	siCAV1
siCAV1_Area_CAV4.1_036	CAV4	1	036	78.5	siCAV1
siCAV1_Area_CAV4.1_037	CAV4	1	037	105.672	siCAV1
siCAV1_Area_CAV4.1_038	CAV4	1	038	37.625	siCAV1
siCAV1_Area_CAV4.1_039	CAV4	1	039	22.5156	siCAV1
siCAV1_Area_CAV4.1_040	CAV4	1	040	69.5781	siCAV1
siCAV1_Area_CAV4.1_041	CAV4	1	041	294.469	siCAV1
siCAV1_Area_CAV4.1_042	CAV4	1	042	7.67188	siCAV1
siCAV1_Area_CAV4.1_043	CAV4	1	043	17.0469	siCAV1
siCAV1_Area_CAV4.1_044	CAV4	1	044	109.859	siCAV1
siCAV1_Area_CAV4.1_045	CAV4	1	045	14.2344	siCAV1
siCAV1_Area_CAV4.1_046	CAV4	1	046	3.875	siCAV1
siCAV1_Area_CAV4.1_047	CAV4	1	047	13.875	siCAV1
siCAV1_Area_CAV4.1_048	CAV4	1	048	15.5156	siCAV1
siCAV1_Area_CAV4.1_049	CAV4	1	049	15.7031	siCAV1
siCAV1_Area_CAV4.1_050	CAV4	1	050	13.7188	siCAV1
siCAV1_Area_CAV4.1_051	CAV4	1	051	2.5625	siCAV1
siCAV1_Area_CAV4.1_052	CAV4	1	052	75.4531	siCAV1
siCAV1_Area_CAV4.1_053	CAV4	1	053	19.6406	siCAV1
siCAV1_Area_CAV4.1_054	CAV4	1	054	303.812	siCAV1
siCAV1_Area_CAV4.1_055	CAV4	1	055	39.5	siCAV1
siCAV1_Area_CAV4.1_056	CAV4	1	056	19.3438	siCAV1
siCAV1_Area_CAV4.1_057	CAV4	1	057	17.875	siCAV1
siCAV1_Area_CAV4.1_058	CAV4	1	058	92.125	siCAV1
siCAV1_Area_CAV4.1_059	CAV4	1	059	22.1562	siCAV1
siCAV1_Area_CAV4.1_060	CAV4	1	060	52.3594	siCAV1
siCAV1_Area_CAV4.1_061	CAV4	1	061	115.469	siCAV1
siCAV1_Area_CAV4.1_062	CAV4	1	062	72.0625	siCAV1
siCAV1_Area_CAV4.1_063	CAV4	1	063	4.64062	siCAV1
siCAV1_Area_CAV4.1_064	CAV4	1	064	13.125	siCAV1
siCAV1_Area_CAV4.1_065	CAV4	1	065	11.0625	siCAV1
siCAV1_Area_CAV4.1_066	CAV4	1	066	48.0156	siCAV1
siCAV1_Area_CAV4.3_067	CAV4	3	067	15.8438	siCAV1
siCAV1_Area_CAV4.3_068	CAV4	3	068	7.32812	siCAV1
siCAV1_Area_CAV4.3_069	CAV4	3	069	4.71875	siCAV1
siCAV1_Area_CAV14.1_070	CAV14	1	070	5.25	siCAV1
siCAV1_Area_CAV14.1_071	CAV14	1	071	8.71875	siCAV1
siCAV1_Area_CAV14.1_072	CAV14	1	072	55.9688	siCAV1
siCAV1_Area_CAV14.1_073	CAV14	1	073	27.75	siCAV1
siCAV1_Area_CAV14.1_074	CAV14	1	074	29	siCAV1
siCAV1_Area_CAV14.1_075	CAV14	1	075	36.9219	siCAV1
siCAV1_Area_CAV14.1_076	CAV14	1	076	27.0625	siCAV1
siCAV1_Area_CAV14.1_077	CAV14	1	077	124.953	siCAV1
siCAV1_Area_CAV14.1_078	CAV14	1	078	39.0625	siCAV1
siCAV1_Area_CAV14.1_079	CAV14	1	079	14.8125	siCAV1
siCAV1_Area_CAV14.1_080	CAV14	1	080	75.0938	siCAV1
siCAV1_Area_CAV14.1_081	CAV14	1	081	44.5781	siCAV1
siCAV1_Area_CAV14.1_082	CAV14	1	082	37.0156	siCAV1
siCAV1_Area_CAV14.1_083	CAV14	1	083	5.25	siCAV1
siCAV1_Area_CAV14.2_084	CAV14	2	084	20.1719	siCAV1
siCAV1_Area_CAV14.2_085	CAV14	2	085	13.0938	siCAV1
siCAV1_Area_CAV14.2_086	CAV14	2	086	5.5	siCAV1
siCAV1_Area_CAV14.2_087	CAV14	2	087	28.2812	siCAV1
siCAV1_Area_CAV14.2_088	CAV14	2	088	133.812	siCAV1
siCAV1_Area_CAV14.2_089	CAV14	2	089	215.172	siCAV1
siCAV1_Area_CAV14.2_090	CAV14	2	090	11.1875	siCAV1
siCAV1_Area_CAV14.2_091	CAV14	2	091	23.6094	siCAV1
siCAV1_Area_CAV14.2_092	CAV14	2	092	214.844	siCAV1
siCAV1_Area_CAV14.2_093	CAV14	2	093	122.953	siCAV1
siCAV1_Area_CAV14.2_094	CAV14	2	094	145.094	siCAV1
siCAV1_Area_CAV15b.144F1_095	CAV15b	144F1	095	11.7969	siCAV1
siCAV1_Area_CAV15b.144F1_096	CAV15b	144F1	096	6.125	siCAV1
siCAV1_Area_CAV15b.144F1_097	CAV15b	144F1	097	1.73438	siCAV1
siCAV1_Area_CAV15b.144F2_098	CAV15b	144F2	098	13.2344	siCAV1
siCAV1_Area_CAV15b.144F2_099	CAV15b	144F2	099	18.3281	siCAV1
siCAV1_Area_CAV15b.144F2_100	CAV15b	144F2	100	37.9375	siCAV1
siCAV1_Area_CAV15b.144F2_101	CAV15b	144F2	101	8.92188	siCAV1
siCAV1_Area_CAV15b.144F2_102	CAV15b	144F2	102	4.625	siCAV1
siCAV1_Area_CAV15b.172F_103	CAV15b	172F	103	3.75	siCAV1
siCAV1_Area_CAV15b.172F_104	CAV15b	172F	104	2.14062	siCAV1
siCAV1_Area_CAV15b.172F_105	CAV15b	172F	105	7.32812	siCAV1
siCavin1_Area_CAV4.2_001	CAV4	2	001	10.2188	siCavin1
siCavin1_Area_CAV4.22_002	CAV4	22	002	4.09375	siCavin1
siCavin1_Area_CAV4.22_003	CAV4	22	003	6.3125	siCavin1
siCavin1_Area_CAV4.22_004	CAV4	22	004	4.42188	siCavin1
siCavin1_Area_CAV4.22_005	CAV4	22	005	5.875	siCavin1
siCavin1_Area_CAV4.22_006	CAV4	22	006	10.75	siCavin1
siCavin1_Area_CAV4.22_007	CAV4	22	007	9.95312	siCavin1
siCavin1_Area_CAV4.22_008	CAV4	22	008	12.875	siCavin1
siCavin1_Area_CAV4.22_009	CAV4	22	009	25.625	siCavin1
siCavin1_Area_CAV4.22_010	CAV4	22	010	5.89062	siCavin1
siCavin1_Area_CAV4.22_011	CAV4	22	011	24.2031	siCavin1
siCavin1_Area_CAV4.22_012	CAV4	22	012	8.21875	siCavin1
siCavin1_Area_CAV4.22_013	CAV4	22	013	5.46875	siCavin1
siCavin1_Area_CAV4.22_014	CAV4	22	014	9.04688	siCavin1
siCavin1_Area_CAV14.0_015	CAV14	0	015	8.125	siCavin1
siCavin1_Area_CAV14.0_016	CAV14	0	016	34.4375	siCavin1
siCavin1_Area_CAV14.0_017	CAV14	0	017	16.4531	siCavin1
siCavin1_Area_CAV14.0_018	CAV14	0	018	8.15625	siCavin1
siCavin1_Area_CAV14.0_019	CAV14	0	019	8.46875	siCavin1
siCavin1_Area_CAV14.0_020	CAV14	0	020	12.2344	siCavin1
siCavin1_Area_CAV14.0_021	CAV14	0	021	40.1719	siCavin1
siCavin1_Area_CAV14.0_022	CAV14	0	022	10.8125	siCavin1
siCavin1_Area_CAV14.0_023	CAV14	0	023	6.21875	siCavin1
siCavin1_Area_CAV14.0_024	CAV14	0	024	13.1562	siCavin1
siCavin1_Area_CAV14.0_025	CAV14	0	025	9.53125	siCavin1
siCavin1_Area_CAV14.0_026	CAV14	0	026	13.3594	siCavin1
siCavin1_Area_CAV14.0_027	CAV14	0	027	11.3281	siCavin1
siCavin1_Area_CAV14.0_028	CAV14	0	028	94.6406	siCavin1
siCavin1_Area_CAV14.0_029	CAV14	0	029	5.34375	siCavin1
siCavin1_Area_CAV14.0_030	CAV14	0	030	7.5625	siCavin1
siCavin1_Area_CAV14.0_031	CAV14	0	031	4.8125	siCavin1
siCavin1_Area_CAV14.0_032	CAV14	0	032	26.5156	siCavin1
siCavin1_Area_CAV14.0_033	CAV14	0	033	15.6719	siCavin1
siCavin1_Area_CAV14.0_034	CAV14	0	034	21.2969	siCavin1
siCavin1_Area_CAV14.0_035	CAV14	0	035	7.21875	siCavin1
siCavin1_Area_CAV14.0_036	CAV14	0	036	27.5469	siCavin1
siCavin1_Area_CAV14.0_037	CAV14	0	037	6.46875	siCavin1
siCavin1_Area_CAV14.0_038	CAV14	0	038	22.5781	siCavin1
siCavin1_Area_CAV14.0_039	CAV14	0	039	18.0938	siCavin1
siCavin1_Area_CAV14.0_040	CAV14	0	040	11.0781	siCavin1
siCavin1_Area_CAV14.0_041	CAV14	0	041	7.78125	siCavin1
siCavin1_Area_CAV14.0_042	CAV14	0	042	4.375	siCavin1
siCavin1_Area_CAV14.0_043	CAV14	0	043	12.7656	siCavin1
siCavin1_Area_CAV14.0_044	CAV14	0	044	27.8906	siCavin1
siCavin1_Area_CAV14.0_045	CAV14	0	045	8.03125	siCavin1
siCavin1_Area_CAV14.0_046	CAV14	0	046	16.0312	siCavin1
siCavin1_Area_CAV14.0_047	CAV14	0	047	72.1094	siCavin1
siCavin1_Area_CAV14.0_048	CAV14	0	048	11.9844	siCavin1
siCavin1_Area_CAV14.0_049	CAV14	0	049	29.25	siCavin1
siCavin1_Area_CAV14.0_050	CAV14	0	050	23.2969	siCavin1
siCavin1_Area_CAV14.0_051	CAV14	0	051	12.1094	siCavin1
siCavin1_Area_CAV14.0_052	CAV14	0	052	5.71875	siCavin1
siCavin1_Area_CAV14.0_053	CAV14	0	053	15.125	siCavin1
siCavin1_Area_CAV14.0_054	CAV14	0	054	13.0156	siCavin1
siCavin1_Area_CAV14.0_055	CAV14	0	055	5.07812	siCavin1
siCavin1_Area_CAV14.0_056	CAV14	0	056	4.32812	siCavin1
siCavin1_Area_CAV14.0_057	CAV14	0	057	11.1094	siCavin1
siCavin1_Area_CAV14.0_058	CAV14	0	058	12.1875	siCavin1
siCavin1_Area_CAV14.0_059	CAV14	0	059	22.3906	siCavin1
siCavin1_Area_CAV14.0_060	CAV14	0	060	15.1406	siCavin1
siCavin1_Area_CAV14.0_061	CAV14	0	061	33.2188	siCavin1
siCavin1_Area_CAV14.0_062	CAV14	0	062	4.6875	siCavin1
siCavin1_Area_CAV14.0_063	CAV14	0	063	11.4688	siCavin1
siCavin1_Area_CAV14.0_064	CAV14	0	064	6.01562	siCavin1
siCavin1_Area_CAV14.0_065	CAV14	0	065	14.2656	siCavin1
siCavin1_Area_CAV14.0_066	CAV14	0	066	7.28125	siCavin1
siCavin1_Area_CAV14.0_067	CAV14	0	067	8.14062	siCavin1
siCavin1_Area_CAV14.0_068	CAV14	0	068	33.6719	siCavin1
siCavin1_Area_CAV14.0_069	CAV14	0	069	14.3281	siCavin1
siCavin1_Area_CAV14.0_070	CAV14	0	070	6.98438	siCavin1
siCavin1_Area_CAV14.0_071	CAV14	0	071	5.17188	siCavin1
siCavin1_Area_CAV14.0_072	CAV14	0	072	4.8125	siCavin1
siCavin1_Area_CAV14.0_073	CAV14	0	073	3.4375	siCavin1
siCavin1_Area_CAV14.0_074	CAV14	0	074	8.42188	siCavin1
siCavin1_Area_CAV14.0_075	CAV14	0	075	9.3125	siCavin1
siCavin1_Area_CAV14.0_076	CAV14	0	076	40.8281	siCavin1
siCavin1_Area_CAV14.0_077	CAV14	0	077	38.3125	siCavin1
siCavin1_Area_CAV14.0_078	CAV14	0	078	26.0938	siCavin1
siCavin1_Area_CAV14.0_079	CAV14	0	079	29.625	siCavin1
siCavin1_Area_CAV14.0_080	CAV14	0	080	21.7031	siCavin1
siCavin1_Area_CAV14.0_081	CAV14	0	081	8.79688	siCavin1
siCavin1_Area_CAV14.0_082	CAV14	0	082	21.4844	siCavin1
siCavin1_Area_CAV14.0_083	CAV14	0	083	18.9219	siCavin1
siCavin1_Area_CAV14.0_084	CAV14	0	084	7.4375	siCavin1
siCavin1_Area_CAV14.0_085	CAV14	0	085	35.75	siCavin1
siCavin1_Area_CAV14.0_086	CAV14	0	086	9.39062	siCavin1
siCavin1_Area_CAV14.0_087	CAV14	0	087	13.0156	siCavin1
siCavin1_Area_CAV14.0_088	CAV14	0	088	6.5	siCavin1
siCavin1_Area_CAV14.0_089	CAV14	0	089	46.3281	siCavin1
siCavin1_Area_CAV14.0_090	CAV14	0	090	5.54688	siCavin1
siCavin1_Area_CAV14.0_091	CAV14	0	091	6.53125	siCavin1
siCavin1_Area_CAV14.0_092	CAV14	0	092	15.7344	siCavin1
siCavin1_Area_CAV14.0_093	CAV14	0	093	7.29688	siCavin1
siCavin1_Area_CAV14.0_094	CAV14	0	094	10.9375	siCavin1
siCavin1_Area_CAV14.0_095	CAV14	0	095	13.3281	siCavin1
siCavin1_Area_CAV14.0_096	CAV14	0	096	10.0625	siCavin1
siCavin1_Area_CAV14.0_097	CAV14	0	097	12.1094	siCavin1
siCavin1_Area_CAV14.0_098	CAV14	0	098	5.20312	siCavin1
siCavin1_Area_CAV14.0_099	CAV14	0	099	9.75	siCavin1
siCavin1_Area_CAV14.0_100	CAV14	0	100	16	siCavin1
siCavin1_Area_CAV14.0_101	CAV14	0	101	81.6094	siCavin1
siCavin1_Area_CAV14.0_102	CAV14	0	102	0.2	siCavin1
siCavin1_Area_CAV14.0_103	CAV14	0	103	6.35938	siCavin1
siCavin1_Area_CAV14.0_104	CAV14	0	104	9.9375	siCavin1
siCavin1_Area_CAV14.0_105	CAV14	0	105	9.34375	siCavin1
siCavin1_Area_CAV14.0_106	CAV14	0	106	26.4531	siCavin1
siCavin1_Area_CAV14.0_107	CAV14	0	107	5.45312	siCavin1
siCavin1_Area_CAV14.0_108	CAV14	0	108	27.8438	siCavin1
siCavin1_Area_CAV14.0_109	CAV14	0	109	14.8281	siCavin1
siCavin1_Area_CAV14.0_110	CAV14	0	110	24.0781	siCavin1
siCavin1_Area_CAV14.0_111	CAV14	0	111	6.76562	siCavin1
siCavin1_Area_CAV14.0_112	CAV14	0	112	13.6875	siCavin1
siCavin1_Area_CAV14.0_113	CAV14	0	113	37.4062	siCavin1
siCavin1_Area_CAV14.0_114	CAV14	0	114	13.4531	siCavin1
siCavin1_Area_CAV14.0_115	CAV14	0	115	24.9062	siCavin1
siCavin1_Area_CAV14.0_116	CAV14	0	116	11.2188	siCavin1
siCavin1_Area_CAV14.0_117	CAV14	0	117	16.5312	siCavin1
siCavin1_Area_CAV14.0_118	CAV14	0	118	119.672	siCavin1
siCavin1_Area_CAV14.0_119	CAV14	0	119	12.0156	siCavin1
siCavin1_Area_CAV14.0_120	CAV14	0	120	5.75	siCavin1
siCavin1_Area_CAV14.0_121	CAV14	0	121	3.5625	siCavin1
siCavin1_Area_CAV14.0_122	CAV14	0	122	8.73438	siCavin1
siCavin1_Area_CAV14.0_123	CAV14	0	123	5.39062	siCavin1
siCavin1_Area_CAV14.0_124	CAV14	0	124	13.7344	siCavin1
siCavin1_Area_CAV14.0_125	CAV14	0	125	24.5938	siCavin1
siCavin1_Area_CAV14.0_126	CAV14	0	126	9.20312	siCavin1
siCavin1_Area_CAV14.0_127	CAV14	0	127	13.2812	siCavin1
siCavin1_Area_CAV14.0_128	CAV14	0	128	7.34375	siCavin1
siCavin1_Area_CAV14.0_129	CAV14	0	129	9.84375	siCavin1
siCavin1_Area_CAV14.0_130	CAV14	0	130	8.73438	siCavin1
siCavin1_Area_CAV14.0_131	CAV14	0	131	17.3281	siCavin1
siCavin1_Area_CAV14.0_132	CAV14	0	132	9.5	siCavin1
siCavin1_Area_CAV14.0_133	CAV14	0	133	6.6875	siCavin1
siCavin1_Area_CAV14.0_134	CAV14	0	134	20.2031	siCavin1
siCavin1_Area_CAV14.0_135	CAV14	0	135	5.96875	siCavin1
siCavin1_Area_CAV14.0_136	CAV14	0	136	26.625	siCavin1
siCavin1_Area_CAV14.0_137	CAV14	0	137	74.4375	siCavin1
siCavin1_Area_CAV14.0_138	CAV14	0	138	8.03125	siCavin1
siCavin1_Area_CAV14.0_139	CAV14	0	139	4.8125	siCavin1
siCavin1_Area_CAV14.0_140	CAV14	0	140	13.25	siCavin1
siCavin1_Area_CAV14.0_141	CAV14	0	141	24.2031	siCavin1
siCavin1_Area_CAV14.192F_142	CAV14	192F	142	3.51562	siCavin1
siCavin1_Area_CAV14.192F_143	CAV14	192F	143	6.89062	siCavin1
siCavin1_Area_CAV14.192F_144	CAV14	192F	144	3.625	siCavin1
siCavin1_Area_CAV14.192F_145	CAV14	192F	145	8.6875	siCavin1
siCavin1_Area_CAV14.192F_146	CAV14	192F	146	8.1875	siCavin1
siCavin1_Area_CAV14.192F_147	CAV14	192F	147	10.9375	siCavin1
siCavin1_Area_CAV14.192F_148	CAV14	192F	148	8.04688	siCavin1
siCavin1_Area_CAV14.192F_149	CAV14	192F	149	8.23438	siCavin1
siCavin1_Area_CAV14.192F_150	CAV14	192F	150	3.42188	siCavin1
siCavin1_Area_CAV14.192F_151	CAV14	192F	151	3.98438	siCavin1
siCavin1_Area_CAV14.192F_152	CAV14	192F	152	4.35938	siCavin1
siCavin1_Area_CAV14.192F_153	CAV14	192F	153	6.01562	siCavin1
siCavin1_Area_CAV14.192F_154	CAV14	192F	154	6.17188	siCavin1
siCavin1_Area_CAV14.192F_155	CAV14	192F	155	5.85938	siCavin1
siCavin1_Area_CAV14.192F_156	CAV14	192F	156	4.0625	siCavin1
siCavin1_Area_CAV14.192F_157	CAV14	192F	157	7.70312	siCavin1
siCavin1_Area_CAV14.192F_158	CAV14	192F	158	3.17188	siCavin1
siCavin1_Area_CAV14.192F_159	CAV14	192F	159	8.92188	siCavin1
siCavin1_Area_CAV14.192F_160	CAV14	192F	160	8.0625	siCavin1
siCavin1_Area_CAV14.192F_161	CAV14	192F	161	6.07812	siCavin1
siCavin1_Area_CAV14.192F_162	CAV14	192F	162	5.04688	siCavin1
siCavin1_Area_CAV14.192F_163	CAV14	192F	163	10.2969	siCavin1
siCavin1_Area_CAV14.192F_164	CAV14	192F	164	5.42188	siCavin1
siCavin1_Area_CAV14.192F_165	CAV14	192F	165	6.98438	siCavin1
siCavin1_Area_CAV14.192F_166	CAV14	192F	166	12.5469	siCavin1
siCavin1_Area_CAV14.192F_167	CAV14	192F	167	7.85938	siCavin1
siCavin1_Area_CAV14.192F_168	CAV14	192F	168	12.875	siCavin1
siCavin1_Area_CAV14.192F_169	CAV14	192F	169	9.39062	siCavin1
siCavin1_Area_CAV14.192F_170	CAV14	192F	170	12.1875	siCavin1
siCavin1_Area_CAV14.192F_171	CAV14	192F	171	6.6875	siCavin1
siCavin1_Area_CAV14.192F_172	CAV14	192F	172	11.0781	siCavin1
siCavin1_Area_CAV14.192F_173	CAV14	192F	173	3.29688	siCavin1
siCavin1_Area_CAV14.192F_174	CAV14	192F	174	6.67188	siCavin1
siCavin1_Area_CAV14.192F_175	CAV14	192F	175	13.9688	siCavin1
siCavin1_Area_CAV14.192F_176	CAV14	192F	176	13.75	siCavin1
siCavin1_Area_CAV14.192F_177	CAV14	192F	177	10.3281	siCavin1
siCavin1_Area_CAV15b.1_178	CAV15b	1	178	10.6719	siCavin1
siCavin1_Area_CAV15b.1_179	CAV15b	1	179	5.92188	siCavin1
siCavin1_Area_CAV15b.1_180	CAV15b	1	180	12.7188	siCavin1
siCavin1_Area_CAV15b.1_181	CAV15b	1	181	10.2188	siCavin1
siCavin1_Area_CAV15b.1_182	CAV15b	1	182	7.9375	siCavin1
siCavin1_Area_CAV15b.1_183	CAV15b	1	183	11.8906	siCavin1
siCavin1_Area_CAV15b.1_184	CAV15b	1	184	7.42188	siCavin1
siCavin1_Area_CAV15b.1_185	CAV15b	1	185	13.0469	siCavin1
siCavin1_Area_CAV15b.1_186	CAV15b	1	186	9.53125	siCavin1
siCavin1_Area_CAV15b.1_187	CAV15b	1	187	3.42188	siCavin1
siCavin1_Area_CAV15b.1_188	CAV15b	1	188	10.2969	siCavin1
siCavin1_Area_CAV15b.1_189	CAV15b	1	189	9.09375	siCavin1
siCavin1_Area_CAV15b.1_190	CAV15b	1	190	9.8125	siCavin1
siCavin1_Area_CAV15b.1_191	CAV15b	1	191	9.28125	siCavin1
siCavin1_Area_CAV15b.1_192	CAV15b	1	192	7.5625	siCavin1
siCavin1_Area_CAV15b.1_193	CAV15b	1	193	3.9375	siCavin1
siCavin1_Area_CAV15b.1_194	CAV15b	1	194	8.04688	siCavin1
siCavin1_Area_CAV15b.1_195	CAV15b	1	195	5.625	siCavin1
siCavin1_Area_CAV15b.1_196	CAV15b	1	196	12.1875	siCavin1
siCavin1_Area_CAV15b.1_197	CAV15b	1	197	10.875	siCavin1
siCavin1_Area_CAV15b.1_198	CAV15b	1	198	3.59375	siCavin1
siCavin1_Area_CAV15b.1_199	CAV15b	1	199	7.20312	siCavin1
siCavin1_Area_CAV15b.1_200	CAV15b	1	200	4.57812	siCavin1
siCavin1_Area_CAV15b.1_201	CAV15b	1	201	7.04688	siCavin1
siCavin1_Area_CAV15b.1_202	CAV15b	1	202	5.42188	siCavin1
siCavin1_Area_CAV15b.1_203	CAV15b	1	203	6.42188	siCavin1
siCavin1_Area_CAV15b.1_204	CAV15b	1	204	3.0625	siCavin1
siCavin1_Area_CAV15b.1_205	CAV15b	1	205	2.92188	siCavin1
siCavin1_Area_CAV15b.1_206	CAV15b	1	206	5.20312	siCavin1
siCavin1_Area_CAV15b.1_207	CAV15b	1	207	4	siCavin1
siCavin1_Area_CAV15b.1_208	CAV15b	1	208	30.1875	siCavin1
siCavin1_Area_CAV15b.1_209	CAV15b	1	209	4.54688	siCavin1
siCavin1_Area_CAV15b.1_210	CAV15b	1	210	11.2031	siCavin1
siCavin1_Area_CAV15b.1_211	CAV15b	1	211	3.15625	siCavin1
siCavin1_Area_CAV15b.1_212	CAV15b	1	212	4.98438	siCavin1
siCavin1_Area_CAV15b.1_213	CAV15b	1	213	7.8125	siCavin1
siCavin1_Area_CAV15b.1_214	CAV15b	1	214	3.65625	siCavin1
siCavin1_Area_CAV15b.1_215	CAV15b	1	215	5.625	siCavin1
siCavin1_Area_CAV15b.1_216	CAV15b	1	216	5.25	siCavin1
siCavin1_Area_CAV15b.1_217	CAV15b	1	217	8.34375	siCavin1
siCavin1_Area_CAV15b.1_218	CAV15b	1	218	6.64062	siCavin1
siCavin1_Area_CAV15b.1_219	CAV15b	1	219	20.3125	siCavin1
siCavin1_Area_CAV15b.1_220	CAV15b	1	220	7.5625	siCavin1
siCavin1_Area_CAV15b.1_221	CAV15b	1	221	5.51562	siCavin1
siCavin1_Area_CAV15b.1_222	CAV15b	1	222	7.45312	siCavin1
siCavin1_Area_CAV15b.1_223	CAV15b	1	223	11.8281	siCavin1
siCavin1_Area_CAV15b.1_224	CAV15b	1	224	4.60938	siCavin1
siCavin1_Area_CAV15b.1_225	CAV15b	1	225	8.64062	siCavin1
siCavin1_Area_CAV15b.1_226	CAV15b	1	226	9.5	siCavin1
siCavin1_Area_CAV15b.1_227	CAV15b	1	227	17.5156	siCavin1
siCavin1_Area_CAV15b.1_228	CAV15b	1	228	3.6875	siCavin1
siCavin1_Area_CAV15b.1_229	CAV15b	1	229	19.0625	siCavin1
siCavin1_Area_CAV15b.2_230	CAV15b	2	230	13.6406	siCavin1
siCavin1_Area_CAV15b.2_231	CAV15b	2	231	23.8125	siCavin1
siCavin1_Area_CAV15b.2_232	CAV15b	2	232	33.1719	siCavin1
siCavin1_Area_CAV15b.2_233	CAV15b	2	233	13.125	siCavin1
siCavin1_Area_CAV15b.2_234	CAV15b	2	234	7.10938	siCavin1
siCavin1_Area_CAV15b.2_235	CAV15b	2	235	6.0625	siCavin1
siCavin1_Area_CAV15b.2_236	CAV15b	2	236	7.90625	siCavin1
siCavin1_Area_CAV15b.2_237	CAV15b	2	237	19.6406	siCavin1

## Sheet: Figure 4C
Condition	Time	TEM	Area	Area_prop	d_Area	d_Time	inv_Time	Time_end	Time_max	Condition.siCTRL	Condition.siCAV1	Condition.siCavin1
siCAV1	0.4	siCAV1_Area_001	0	0			2.5	5.6	1.4	0	1	0
siCAV1	1.1	siCAV1_Area_001	23.2344	97.8289	23.2344	0.7	0.909091	5.6	1.4	0	1	0
siCAV1	1.4	siCAV1_Area_001	23.75	100	0.515625	0.3	0.714286	5.6	1.4	0	1	0
siCAV1	1.8	siCAV1_Area_001	23.3281	98.2237	-0.421875	0.4	0.555556	5.6	1.4	0	1	0
siCAV1	2.1	siCAV1_Area_001	22.25	93.6842	-1.07812	0.3	0.47619	5.6	1.4	0	1	0
siCAV1	2.5	siCAV1_Area_001	19.7656	83.2237	-2.48438	0.4	0.4	5.6	1.4	0	1	0
siCAV1	2.8	siCAV1_Area_001	14.5469	61.25	-5.21875	0.3	0.357143	5.6	1.4	0	1	0
siCAV1	3.2	siCAV1_Area_001	10.6719	44.9342	-3.875	0.4	0.3125	5.6	1.4	0	1	0
siCAV1	3.5	siCAV1_Area_001	6.98438	29.4079	-3.6875	0.3	0.285714	5.6	1.4	0	1	0
siCAV1	3.9	siCAV1_Area_001	4.29688	18.0921	-2.6875	0.4	0.25641	5.6	1.4	0	1	0
siCAV1	4.2	siCAV1_Area_001	1.70312	7.17105	-2.59375	0.3	0.238095	5.6	1.4	0	1	0
siCAV1	5.6	siCAV1_Area_001	0	0	-1.70312	1.4	0.178571	5.6	1.4	0	1	0
siCAV1	0.4	siCAV1_Area_002	0	0			2.5	4.6	1.1	0	1	0
siCAV1	1.1	siCAV1_Area_002	6.89062	100	6.89062	0.7	0.909091	4.6	1.1	0	1	0
siCAV1	1.4	siCAV1_Area_002	6.53125	94.7846	-0.359375	0.3	0.714286	4.6	1.1	0	1	0
siCAV1	1.8	siCAV1_Area_002	5.51562	80.0454	-1.01562	0.4	0.555556	4.6	1.1	0	1	0
siCAV1	2.1	siCAV1_Area_002	4.25	61.678	-1.26562	0.3	0.47619	4.6	1.1	0	1	0
siCAV1	4.6	siCAV1_Area_002	0	0	-4.25	2.5	0.217391	4.6	1.1	0	1	0
siCAV1	0.4	siCAV1_Area_003	0	0			2.5	13.3	2.5	0	1	0
siCAV1	1.1	siCAV1_Area_003	81.625	63.1223	81.625	0.7	0.909091	13.3	2.5	0	1	0
siCAV1	1.4	siCAV1_Area_003	116.766	90.2972	35.1406	0.3	0.714286	13.3	2.5	0	1	0
siCAV1	1.8	siCAV1_Area_003	124.359	96.1696	7.59375	0.4	0.555556	13.3	2.5	0	1	0
siCAV1	2.1	siCAV1_Area_003	126.688	97.97	2.32812	0.3	0.47619	13.3	2.5	0	1	0
siCAV1	2.5	siCAV1_Area_003	129.312	100	2.625	0.4	0.4	13.3	2.5	0	1	0
siCAV1	2.8	siCAV1_Area_003	128.031	99.0092	-1.28125	0.3	0.357143	13.3	2.5	0	1	0
siCAV1	3.2	siCAV1_Area_003	126.766	98.0304	-1.26562	0.4	0.3125	13.3	2.5	0	1	0
siCAV1	3.5	siCAV1_Area_003	124.359	96.1696	-2.40625	0.3	0.285714	13.3	2.5	0	1	0
siCAV1	3.9	siCAV1_Area_003	121.922	94.2847	-2.4375	0.4	0.25641	13.3	2.5	0	1	0
siCAV1	4.2	siCAV1_Area_003	117.531	90.8893	-4.39062	0.3	0.238095	13.3	2.5	0	1	0
siCAV1	4.6	siCAV1_Area_003	111.719	86.3944	-5.8125	0.4	0.217391	13.3	2.5	0	1	0
siCAV1	4.9	siCAV1_Area_003	104.844	81.0778	-6.875	0.3	0.204082	13.3	2.5	0	1	0
siCAV1	5.3	siCAV1_Area_003	96.7656	74.8308	-8.07812	0.4	0.188679	13.3	2.5	0	1	0
siCAV1	5.6	siCAV1_Area_003	90.2812	69.8163	-6.48438	0.3	0.178571	13.3	2.5	0	1	0
siCAV1	6	siCAV1_Area_003	83.3438	64.4514	-6.9375	0.4	0.166667	13.3	2.5	0	1	0
siCAV1	6.3	siCAV1_Area_003	72.0156	55.6912	-11.3281	0.3	0.15873	13.3	2.5	0	1	0
siCAV1	6.7	siCAV1_Area_003	63.8125	49.3475	-8.20312	0.4	0.149254	13.3	2.5	0	1	0
siCAV1	7	siCAV1_Area_003	56.7031	43.8497	-7.10938	0.3	0.142857	13.3	2.5	0	1	0
siCAV1	7.4	siCAV1_Area_003	50.9531	39.4031	-5.75	0.4	0.135135	13.3	2.5	0	1	0
siCAV1	7.7	siCAV1_Area_003	43.5312	33.6636	-7.42188	0.3	0.12987	13.3	2.5	0	1	0
siCAV1	8.1	siCAV1_Area_003	37.7344	29.1808	-5.79688	0.4	0.123457	13.3	2.5	0	1	0
siCAV1	8.4	siCAV1_Area_003	32.2188	24.9154	-5.51562	0.3	0.119048	13.3	2.5	0	1	0
siCAV1	8.8	siCAV1_Area_003	27.5469	21.3026	-4.67188	0.4	0.113636	13.3	2.5	0	1	0
siCAV1	9.1	siCAV1_Area_003	24.7344	19.1276	-2.8125	0.3	0.10989	13.3	2.5	0	1	0
siCAV1	9.5	siCAV1_Area_003	22.2031	17.1701	-2.53125	0.4	0.105263	13.3	2.5	0	1	0
siCAV1	9.8	siCAV1_Area_003	18.0625	13.9681	-4.14062	0.3	0.102041	13.3	2.5	0	1	0
siCAV1	10.2	siCAV1_Area_003	14.2656	11.0319	-3.79688	0.4	0.0980392	13.3	2.5	0	1	0
siCAV1	10.5	siCAV1_Area_003	9.34375	7.22571	-4.92188	0.3	0.0952381	13.3	2.5	0	1	0
siCAV1	10.9	siCAV1_Area_003	6.73438	5.20783	-2.60938	0.4	0.0917431	13.3	2.5	0	1	0
siCAV1	11.2	siCAV1_Area_003	4.9375	3.81827	-1.79688	0.3	0.0892857	13.3	2.5	0	1	0
siCAV1	11.6	siCAV1_Area_003	3.42188	2.64621	-1.51562	0.4	0.0862069	13.3	2.5	0	1	0
siCAV1	11.9	siCAV1_Area_003	2.48438	1.92122	-0.9375	0.3	0.0840336	13.3	2.5	0	1	0
siCAV1	12.3	siCAV1_Area_003	1.51562	1.17206	-0.96875	0.4	0.0813008	13.3	2.5	0	1	0
siCAV1	12.6	siCAV1_Area_003	0.859375	0.664572	-0.65625	0.3	0.0793651	13.3	2.5	0	1	0
siCAV1	13.3	siCAV1_Area_003	0	0	-0.859375	0.7	0.075188	13.3	2.5	0	1	0
siCAV1	0.4	siCAV1_Area_004	0	0			2.5	5.3	1.4	0	1	0
siCAV1	0.7	siCAV1_Area_004	2.5182	82.6165	2.5182	0.3	1.42857	5.3	1.4	0	1	0
siCAV1	1.1	siCAV1_Area_004	3.02266	99.1668	0.504463	0.4	0.909091	5.3	1.4	0	1	0
siCAV1	1.4	siCAV1_Area_004	3.04806	100	0.0253975	0.3	0.714286	5.3	1.4	0	1	0
siCAV1	1.8	siCAV1_Area_004	2.88545	94.665	-0.162615	0.4	0.555556	5.3	1.4	0	1	0
siCAV1	2.1	siCAV1_Area_004	2.80681	92.0851	-0.0786373	0.3	0.47619	5.3	1.4	0	1	0
siCAV1	2.5	siCAV1_Area_004	2.53002	83.0043	-0.276785	0.4	0.4	5.3	1.4	0	1	0
siCAV1	2.8	siCAV1_Area_004	2.28849	75.0803	-0.241531	0.3	0.357143	5.3	1.4	0	1	0
siCAV1	3.2	siCAV1_Area_004	1.86455	61.1716	-0.423943	0.4	0.3125	5.3	1.4	0	1	0
siCAV1	3.5	siCAV1_Area_004	1.43321	47.0204	-0.431338	0.3	0.285714	5.3	1.4	0	1	0
siCAV1	3.9	siCAV1_Area_004	1.02684	33.6883	-0.40637	0.4	0.25641	5.3	1.4	0	1	0
siCAV1	4.2	siCAV1_Area_004	0.694578	22.7875	-0.332263	0.3	0.238095	5.3	1.4	0	1	0
siCAV1	4.6	siCAV1_Area_004	0.622848	20.4343	-0.0717294	0.4	0.217391	5.3	1.4	0	1	0
siCAV1	4.9	siCAV1_Area_004	0.527751	17.3143	-0.0950974	0.3	0.204082	5.3	1.4	0	1	0
siCAV1	5.3	siCAV1_Area_004	0	0	-0.527751	0.4	0.188679	5.3	1.4	0	1	0
siCAV1	0.4	siCAV1_Area_005	0	0			2.5	13	2.5	0	1	0
siCAV1	1.4	siCAV1_Area_005	38.1719	60.862	38.1719	1	0.714286	13	2.5	0	1	0
siCAV1	1.8	siCAV1_Area_005	53.2031	84.8281	15.0312	0.4	0.555556	13	2.5	0	1	0
siCAV1	2.1	siCAV1_Area_005	61.3906	97.8824	8.1875	0.3	0.47619	13	2.5	0	1	0
siCAV1	2.5	siCAV1_Area_005	62.7188	100	1.32812	0.4	0.4	13	2.5	0	1	0
siCAV1	2.8	siCAV1_Area_005	61.7031	98.3807	-1.01562	0.3	0.357143	13	2.5	0	1	0
siCAV1	3.2	siCAV1_Area_005	56.4375	89.9851	-5.26562	0.4	0.3125	13	2.5	0	1	0
siCAV1	3.5	siCAV1_Area_005	50.7031	80.8421	-5.73438	0.3	0.285714	13	2.5	0	1	0
siCAV1	3.9	siCAV1_Area_005	47.125	75.137	-3.57812	0.4	0.25641	13	2.5	0	1	0
siCAV1	4.2	siCAV1_Area_005	42.4375	67.6632	-4.6875	0.3	0.238095	13	2.5	0	1	0
siCAV1	4.6	siCAV1_Area_005	38.0469	60.6627	-4.39062	0.4	0.217391	13	2.5	0	1	0
siCAV1	4.9	siCAV1_Area_005	34.3906	54.8331	-3.65625	0.3	0.204082	13	2.5	0	1	0
siCAV1	5.3	siCAV1_Area_005	30.4062	48.4803	-3.98438	0.4	0.188679	13	2.5	0	1	0
siCAV1	5.6	siCAV1_Area_005	26.2188	41.8037	-4.1875	0.3	0.178571	13	2.5	0	1	0
siCAV1	6	siCAV1_Area_005	21.5625	34.3797	-4.65625	0.4	0.166667	13	2.5	0	1	0
siCAV1	6.3	siCAV1_Area_005	18.0312	28.7494	-3.53125	0.3	0.15873	13	2.5	0	1	0
siCAV1	6.7	siCAV1_Area_005	16.0938	25.6602	-1.9375	0.4	0.149254	13	2.5	0	1	0
siCAV1	7	siCAV1_Area_005	12.9219	20.6029	-3.17188	0.3	0.142857	13	2.5	0	1	0
siCAV1	7.4	siCAV1_Area_005	10.0938	16.0937	-2.82812	0.4	0.135135	13	2.5	0	1	0
siCAV1	7.7	siCAV1_Area_005	8.85938	14.1256	-1.23438	0.3	0.12987	13	2.5	0	1	0
siCAV1	8.1	siCAV1_Area_005	8.03125	12.8052	-0.828125	0.4	0.123457	13	2.5	0	1	0
siCAV1	8.4	siCAV1_Area_005	6.84375	10.9118	-1.1875	0.3	0.119048	13	2.5	0	1	0
siCAV1	8.8	siCAV1_Area_005	6.65625	10.6129	-0.1875	0.4	0.113636	13	2.5	0	1	0
siCAV1	9.1	siCAV1_Area_005	5.71875	9.11809	-0.9375	0.3	0.10989	13	2.5	0	1	0
siCAV1	9.5	siCAV1_Area_005	3.65625	5.8296	-2.0625	0.4	0.105263	13	2.5	0	1	0
siCAV1	9.8	siCAV1_Area_005	2.84375	4.53413	-0.8125	0.3	0.102041	13	2.5	0	1	0
siCAV1	10.2	siCAV1_Area_005	2.17188	3.46288	-0.671875	0.4	0.0980392	13	2.5	0	1	0
siCAV1	10.5	siCAV1_Area_005	1.8125	2.88989	-0.359375	0.3	0.0952381	13	2.5	0	1	0
siCAV1	10.9	siCAV1_Area_005	1.76562	2.81515	-0.046875	0.4	0.0917431	13	2.5	0	1	0
siCAV1	11.2	siCAV1_Area_005	1.5	2.39163	-0.265625	0.3	0.0892857	13	2.5	0	1	0
siCAV1	11.6	siCAV1_Area_005	1.46875	2.3418	-0.03125	0.4	0.0862069	13	2.5	0	1	0
siCAV1	11.9	siCAV1_Area_005	1.3125	2.09268	-0.15625	0.3	0.0840336	13	2.5	0	1	0
siCAV1	12.3	siCAV1_Area_005	0.59375	0.946687	-0.71875	0.4	0.0813008	13	2.5	0	1	0
siCAV1	12.6	siCAV1_Area_005	0.5625	0.896861	-0.03125	0.3	0.0793651	13	2.5	0	1	0
siCAV1	13	siCAV1_Area_005	0	0	-0.5625	0.4	0.0769231	13	2.5	0	1	0
siCAV1	0.4	siCAV1_Area_006	0	0			2.5	20.7	7	0	1	0
siCAV1	1.1	siCAV1_Area_006	130.797	29.5628	130.797	0.7	0.909091	20.7	7	0	1	0
siCAV1	1.4	siCAV1_Area_006	221.844	50.1413	91.0469	0.3	0.714286	20.7	7	0	1	0
siCAV1	1.8	siCAV1_Area_006	288.953	65.3094	67.1094	0.4	0.555556	20.7	7	0	1	0
siCAV1	2.1	siCAV1_Area_006	328.266	74.1948	39.3125	0.3	0.47619	20.7	7	0	1	0
siCAV1	2.5	siCAV1_Area_006	339.844	76.8117	11.5781	0.4	0.4	20.7	7	0	1	0
siCAV1	2.8	siCAV1_Area_006	351.703	79.4922	11.8594	0.3	0.357143	20.7	7	0	1	0
siCAV1	3.2	siCAV1_Area_006	361.719	81.7559	10.0156	0.4	0.3125	20.7	7	0	1	0
siCAV1	3.5	siCAV1_Area_006	373.875	84.5035	12.1562	0.3	0.285714	20.7	7	0	1	0
siCAV1	3.9	siCAV1_Area_006	381.641	86.2587	7.76562	0.4	0.25641	20.7	7	0	1	0
siCAV1	4.2	siCAV1_Area_006	393.125	88.8544	11.4844	0.3	0.238095	20.7	7	0	1	0
siCAV1	4.6	siCAV1_Area_006	405.094	91.5595	11.9688	0.4	0.217391	20.7	7	0	1	0
siCAV1	4.9	siCAV1_Area_006	410.422	92.7638	5.32812	0.3	0.204082	20.7	7	0	1	0
siCAV1	5.3	siCAV1_Area_006	402.469	90.9662	-7.95312	0.4	0.188679	20.7	7	0	1	0
siCAV1	5.6	siCAV1_Area_006	413.062	93.3606	10.5938	0.3	0.178571	20.7	7	0	1	0
siCAV1	6	siCAV1_Area_006	415	93.7986	1.9375	0.4	0.166667	20.7	7	0	1	0
siCAV1	6.3	siCAV1_Area_006	420.234	94.9816	5.23438	0.3	0.15873	20.7	7	0	1	0
siCAV1	6.7	siCAV1_Area_006	429.562	97.09	9.32812	0.4	0.149254	20.7	7	0	1	0
siCAV1	7	siCAV1_Area_006	442.438	100	12.875	0.3	0.142857	20.7	7	0	1	0
siCAV1	7.4	siCAV1_Area_006	422.391	95.469	-20.0469	0.4	0.135135	20.7	7	0	1	0
siCAV1	7.7	siCAV1_Area_006	397.719	89.8926	-24.6719	0.3	0.12987	20.7	7	0	1	0
siCAV1	8.1	siCAV1_Area_006	385.703	87.1769	-12.0156	0.4	0.123457	20.7	7	0	1	0
siCAV1	8.4	siCAV1_Area_006	361.719	81.7559	-23.9844	0.3	0.119048	20.7	7	0	1	0
siCAV1	8.8	siCAV1_Area_006	354.562	80.1384	-7.15625	0.4	0.113636	20.7	7	0	1	0
siCAV1	9.1	siCAV1_Area_006	346.031	78.2102	-8.53125	0.3	0.10989	20.7	7	0	1	0
siCAV1	9.5	siCAV1_Area_006	335.578	75.8476	-10.4531	0.4	0.105263	20.7	7	0	1	0
siCAV1	9.8	siCAV1_Area_006	321.312	72.6233	-14.2656	0.3	0.102041	20.7	7	0	1	0
siCAV1	10.2	siCAV1_Area_006	293.281	66.2876	-28.0312	0.4	0.0980392	20.7	7	0	1	0
siCAV1	10.5	siCAV1_Area_006	275.859	62.3499	-17.4219	0.3	0.0952381	20.7	7	0	1	0
siCAV1	10.9	siCAV1_Area_006	253.344	57.2609	-22.5156	0.4	0.0917431	20.7	7	0	1	0
siCAV1	11.2	siCAV1_Area_006	230.875	52.1825	-22.4688	0.3	0.0892857	20.7	7	0	1	0
siCAV1	11.6	siCAV1_Area_006	222.656	50.3249	-8.21875	0.4	0.0862069	20.7	7	0	1	0
siCAV1	11.9	siCAV1_Area_006	212.188	47.9588	-10.4688	0.3	0.0840336	20.7	7	0	1	0
siCAV1	12.3	siCAV1_Area_006	195.266	44.1341	-16.9219	0.4	0.0813008	20.7	7	0	1	0
siCAV1	12.6	siCAV1_Area_006	177.625	40.1469	-17.6406	0.3	0.0793651	20.7	7	0	1	0
siCAV1	13	siCAV1_Area_006	155.312	35.1038	-22.3125	0.4	0.0769231	20.7	7	0	1	0
siCAV1	13.3	siCAV1_Area_006	130.266	29.4427	-25.0469	0.3	0.075188	20.7	7	0	1	0
siCAV1	13.7	siCAV1_Area_006	113.562	25.6675	-16.7031	0.4	0.0729927	20.7	7	0	1	0
siCAV1	14	siCAV1_Area_006	105	23.7322	-8.5625	0.3	0.0714286	20.7	7	0	1	0
siCAV1	14.4	siCAV1_Area_006	113.141	25.5721	8.14062	0.4	0.0694444	20.7	7	0	1	0
siCAV1	14.7	siCAV1_Area_006	106.25	24.0147	-6.89062	0.3	0.0680272	20.7	7	0	1	0
siCAV1	15.1	siCAV1_Area_006	111.375	25.173	5.125	0.4	0.0662252	20.7	7	0	1	0
siCAV1	15.4	siCAV1_Area_006	111.328	25.1625	-0.046875	0.3	0.0649351	20.7	7	0	1	0
siCAV1	15.8	siCAV1_Area_006	94.1562	21.2813	-17.1719	0.4	0.0632911	20.7	7	0	1	0
siCAV1	16.1	siCAV1_Area_006	81.4531	18.4101	-12.7031	0.3	0.0621118	20.7	7	0	1	0
siCAV1	16.5	siCAV1_Area_006	68.3906	15.4577	-13.0625	0.4	0.0606061	20.7	7	0	1	0
siCAV1	16.8	siCAV1_Area_006	55.625	12.5724	-12.7656	0.3	0.0595238	20.7	7	0	1	0
siCAV1	17.2	siCAV1_Area_006	34.1719	7.72355	-21.4531	0.4	0.0581395	20.7	7	0	1	0
siCAV1	17.5	siCAV1_Area_006	21.8281	4.93361	-12.3438	0.3	0.0571429	20.7	7	0	1	0
siCAV1	17.9	siCAV1_Area_006	15.6094	3.52804	-6.21875	0.4	0.0558659	20.7	7	0	1	0
siCAV1	18.2	siCAV1_Area_006	9.67188	2.18604	-5.9375	0.3	0.0549451	20.7	7	0	1	0
siCAV1	18.6	siCAV1_Area_006	2.90625	0.656872	-6.76562	0.4	0.0537634	20.7	7	0	1	0
siCAV1	18.9	siCAV1_Area_006	1.96875	0.444978	-0.9375	0.3	0.0529101	20.7	7	0	1	0
siCAV1	19.3	siCAV1_Area_006	0.890625	0.2013	-1.07812	0.4	0.0518135	20.7	7	0	1	0
siCAV1	20.7	siCAV1_Area_006	0	0	-0.890625	1.4	0.0483092	20.7	7	0	1	0
siCAV1	0.4	siCAV1_Area_007	0	0			2.5	9.1	3.9	0	1	0
siCAV1	1.1	siCAV1_Area_007	12.9531	97.0726	12.9531	0.7	0.909091	9.1	3.9	0	1	0
siCAV1	1.4	siCAV1_Area_007	11.1562	83.6066	-1.79688	0.3	0.714286	9.1	3.9	0	1	0
siCAV1	1.8	siCAV1_Area_007	10.6406	79.7424	-0.515625	0.4	0.555556	9.1	3.9	0	1	0
siCAV1	2.1	siCAV1_Area_007	12.2344	91.6862	1.59375	0.3	0.47619	9.1	3.9	0	1	0
siCAV1	2.5	siCAV1_Area_007	11.7188	87.822	-0.515625	0.4	0.4	9.1	3.9	0	1	0
siCAV1	2.8	siCAV1_Area_007	12.625	94.6136	0.90625	0.3	0.357143	9.1	3.9	0	1	0
siCAV1	3.2	siCAV1_Area_007	12.5938	94.3794	-0.03125	0.4	0.3125	9.1	3.9	0	1	0
siCAV1	3.5	siCAV1_Area_007	11.8125	88.5246	-0.78125	0.3	0.285714	9.1	3.9	0	1	0
siCAV1	3.9	siCAV1_Area_007	13.3438	100	1.53125	0.4	0.25641	9.1	3.9	0	1	0
siCAV1	4.2	siCAV1_Area_007	11.8281	88.6417	-1.51562	0.3	0.238095	9.1	3.9	0	1	0
siCAV1	4.6	siCAV1_Area_007	10.3125	77.2834	-1.51562	0.4	0.217391	9.1	3.9	0	1	0
siCAV1	4.9	siCAV1_Area_007	9.32812	69.9063	-0.984375	0.3	0.204082	9.1	3.9	0	1	0
siCAV1	5.3	siCAV1_Area_007	9	67.4473	-0.328125	0.4	0.188679	9.1	3.9	0	1	0
siCAV1	5.6	siCAV1_Area_007	8.76562	65.6909	-0.234375	0.3	0.178571	9.1	3.9	0	1	0
siCAV1	6	siCAV1_Area_007	7.67188	57.4941	-1.09375	0.4	0.166667	9.1	3.9	0	1	0
siCAV1	6.3	siCAV1_Area_007	6.23438	46.7213	-1.4375	0.3	0.15873	9.1	3.9	0	1	0
siCAV1	6.7	siCAV1_Area_007	4.8125	36.0656	-1.42188	0.4	0.149254	9.1	3.9	0	1	0
siCAV1	7	siCAV1_Area_007	3.45312	25.8782	-1.35938	0.3	0.142857	9.1	3.9	0	1	0
siCAV1	7.4	siCAV1_Area_007	2.03125	15.2225	-1.42188	0.4	0.135135	9.1	3.9	0	1	0
siCAV1	7.7	siCAV1_Area_007	1.76562	13.2319	-0.265625	0.3	0.12987	9.1	3.9	0	1	0
siCAV1	8.1	siCAV1_Area_007	0.96875	7.25995	-0.796875	0.4	0.123457	9.1	3.9	0	1	0
siCAV1	8.4	siCAV1_Area_007	0.65625	4.91803	-0.3125	0.3	0.119048	9.1	3.9	0	1	0
siCAV1	9.1	siCAV1_Area_007	0	0	-0.65625	0.7	0.10989	9.1	3.9	0	1	0
siCAV1	0.4	siCAV1_Area_008	0	0			2.5	10.2	1.8	0	1	0
siCAV1	0.7	siCAV1_Area_008	91.4688	81.2604	91.4688	0.3	1.42857	10.2	1.8	0	1	0
siCAV1	1.1	siCAV1_Area_008	109.031	96.8629	17.5625	0.4	0.909091	10.2	1.8	0	1	0
siCAV1	1.4	siCAV1_Area_008	112.328	99.7918	3.29688	0.3	0.714286	10.2	1.8	0	1	0
siCAV1	1.8	siCAV1_Area_008	112.562	100	0.234375	0.4	0.555556	10.2	1.8	0	1	0
siCAV1	2.1	siCAV1_Area_008	111.172	98.7646	-1.39062	0.3	0.47619	10.2	1.8	0	1	0
siCAV1	2.5	siCAV1_Area_008	107.344	95.3637	-3.82812	0.4	0.4	10.2	1.8	0	1	0
siCAV1	2.8	siCAV1_Area_008	107.781	95.7524	0.4375	0.3	0.357143	10.2	1.8	0	1	0
siCAV1	3.2	siCAV1_Area_008	104.219	92.5875	-3.5625	0.4	0.3125	10.2	1.8	0	1	0
siCAV1	3.5	siCAV1_Area_008	94.9531	84.3559	-9.26562	0.3	0.285714	10.2	1.8	0	1	0
siCAV1	3.9	siCAV1_Area_008	87.4219	77.6652	-7.53125	0.4	0.25641	10.2	1.8	0	1	0
siCAV1	4.2	siCAV1_Area_008	81.7031	72.5847	-5.71875	0.3	0.238095	10.2	1.8	0	1	0
siCAV1	4.6	siCAV1_Area_008	73.1562	64.9917	-8.54688	0.4	0.217391	10.2	1.8	0	1	0
siCAV1	4.9	siCAV1_Area_008	67.7656	60.2027	-5.39062	0.3	0.204082	10.2	1.8	0	1	0
siCAV1	5.3	siCAV1_Area_008	57.4844	51.0689	-10.2812	0.4	0.188679	10.2	1.8	0	1	0
siCAV1	5.6	siCAV1_Area_008	45.5625	40.4775	-11.9219	0.3	0.178571	10.2	1.8	0	1	0
siCAV1	6	siCAV1_Area_008	32.3125	28.7063	-13.25	0.4	0.166667	10.2	1.8	0	1	0
siCAV1	6.3	siCAV1_Area_008	23.3906	20.7801	-8.92188	0.3	0.15873	10.2	1.8	0	1	0
siCAV1	6.7	siCAV1_Area_008	15.9688	14.1866	-7.42188	0.4	0.149254	10.2	1.8	0	1	0
siCAV1	7	siCAV1_Area_008	9.3125	8.27318	-6.65625	0.3	0.142857	10.2	1.8	0	1	0
siCAV1	7.4	siCAV1_Area_008	4.375	3.88673	-4.9375	0.4	0.135135	10.2	1.8	0	1	0
siCAV1	7.7	siCAV1_Area_008	1.73438	1.54081	-2.64062	0.3	0.12987	10.2	1.8	0	1	0
siCAV1	8.1	siCAV1_Area_008	0.84375	0.749584	-0.890625	0.4	0.123457	10.2	1.8	0	1	0
siCAV1	8.4	siCAV1_Area_008	0.640625	0.569128	-0.203125	0.3	0.119048	10.2	1.8	0	1	0
siCAV1	10.2	siCAV1_Area_008	0	0	-0.640625	1.8	0.0980392	10.2	1.8	0	1	0
siCAV1	0.4	siCAV1_Area_009	0	0			2.5	7.4	1.1	0	1	0
siCAV1	0.7	siCAV1_Area_009	38.8594	93.4962	38.8594	0.3	1.42857	7.4	1.1	0	1	0
siCAV1	1.1	siCAV1_Area_009	41.5625	100	2.70312	0.4	0.909091	7.4	1.1	0	1	0
siCAV1	1.4	siCAV1_Area_009	36.2031	87.1053	-5.35938	0.3	0.714286	7.4	1.1	0	1	0
siCAV1	1.8	siCAV1_Area_009	32.9062	79.1729	-3.29688	0.4	0.555556	7.4	1.1	0	1	0
siCAV1	2.1	siCAV1_Area_009	34.2031	82.2932	1.29688	0.3	0.47619	7.4	1.1	0	1	0
siCAV1	2.5	siCAV1_Area_009	34.4375	82.8571	0.234375	0.4	0.4	7.4	1.1	0	1	0
siCAV1	2.8	siCAV1_Area_009	31.5625	75.9398	-2.875	0.3	0.357143	7.4	1.1	0	1	0
siCAV1	3.2	siCAV1_Area_009	29.4688	70.9023	-2.09375	0.4	0.3125	7.4	1.1	0	1	0
siCAV1	3.5	siCAV1_Area_009	28.0938	67.594	-1.375	0.3	0.285714	7.4	1.1	0	1	0
siCAV1	3.9	siCAV1_Area_009	21.4688	51.6541	-6.625	0.4	0.25641	7.4	1.1	0	1	0
siCAV1	4.2	siCAV1_Area_009	17.7344	42.6692	-3.73438	0.3	0.238095	7.4	1.1	0	1	0
siCAV1	4.6	siCAV1_Area_009	14.9688	36.015	-2.76562	0.4	0.217391	7.4	1.1	0	1	0
siCAV1	4.9	siCAV1_Area_009	12.5781	30.2632	-2.39062	0.3	0.204082	7.4	1.1	0	1	0
siCAV1	5.3	siCAV1_Area_009	10.0312	24.1353	-2.54688	0.4	0.188679	7.4	1.1	0	1	0
siCAV1	5.6	siCAV1_Area_009	6.92188	16.6541	-3.10938	0.3	0.178571	7.4	1.1	0	1	0
siCAV1	6	siCAV1_Area_009	3.5625	8.57143	-3.35938	0.4	0.166667	7.4	1.1	0	1	0
siCAV1	6.3	siCAV1_Area_009	1.73438	4.17293	-1.82812	0.3	0.15873	7.4	1.1	0	1	0
siCAV1	6.7	siCAV1_Area_009	0.8125	1.95489	-0.921875	0.4	0.149254	7.4	1.1	0	1	0
siCAV1	7.4	siCAV1_Area_009	0	0	-0.8125	0.7	0.135135	7.4	1.1	0	1	0
siCAV1	0.4	siCAV1_Area_010	0	0			2.5	9.1	1.1	0	1	0
siCAV1	0.7	siCAV1_Area_010	133.969	92.6518	133.969	0.3	1.42857	9.1	1.1	0	1	0
siCAV1	1.1	siCAV1_Area_010	144.594	100	10.625	0.4	0.909091	9.1	1.1	0	1	0
siCAV1	1.4	siCAV1_Area_010	143.469	99.222	-1.125	0.3	0.714286	9.1	1.1	0	1	0
siCAV1	1.8	siCAV1_Area_010	142.453	98.5196	-1.01562	0.4	0.555556	9.1	1.1	0	1	0
siCAV1	2.1	siCAV1_Area_010	134.703	93.1597	-7.75	0.3	0.47619	9.1	1.1	0	1	0
siCAV1	2.5	siCAV1_Area_010	127.609	88.2537	-7.09375	0.4	0.4	9.1	1.1	0	1	0
siCAV1	2.8	siCAV1_Area_010	115.672	79.9978	-11.9375	0.3	0.357143	9.1	1.1	0	1	0
siCAV1	3.2	siCAV1_Area_010	100.688	69.6348	-14.9844	0.4	0.3125	9.1	1.1	0	1	0
siCAV1	3.5	siCAV1_Area_010	84.6719	58.5585	-16.0156	0.3	0.285714	9.1	1.1	0	1	0
siCAV1	3.9	siCAV1_Area_010	66.4219	45.9369	-18.25	0.4	0.25641	9.1	1.1	0	1	0
siCAV1	4.2	siCAV1_Area_010	52.2812	36.1573	-14.1406	0.3	0.238095	9.1	1.1	0	1	0
siCAV1	4.6	siCAV1_Area_010	35.9531	24.8649	-16.3281	0.4	0.217391	9.1	1.1	0	1	0
siCAV1	4.9	siCAV1_Area_010	20.5312	14.1993	-15.4219	0.3	0.204082	9.1	1.1	0	1	0
siCAV1	5.3	siCAV1_Area_010	7.03125	4.86276	-13.5	0.4	0.188679	9.1	1.1	0	1	0
siCAV1	9.1	siCAV1_Area_010	0	0	-7.03125	3.8	0.10989	9.1	1.1	0	1	0
siCAV1	0.4	siCAV1_Area_011	0	0			2.5	8.8	1.1	0	1	0
siCAV1	1.1	siCAV1_Area_011	16.1094	100	16.1094	0.7	0.909091	8.8	1.1	0	1	0
siCAV1	1.4	siCAV1_Area_011	15.6094	96.8962	-0.5	0.3	0.714286	8.8	1.1	0	1	0
siCAV1	1.8	siCAV1_Area_011	14.8594	92.2405	-0.75	0.4	0.555556	8.8	1.1	0	1	0
siCAV1	2.1	siCAV1_Area_011	15.3438	95.2473	0.484375	0.3	0.47619	8.8	1.1	0	1	0
siCAV1	2.5	siCAV1_Area_011	13.8906	86.227	-1.45312	0.4	0.4	8.8	1.1	0	1	0
siCAV1	2.8	siCAV1_Area_011	12.0469	74.7818	-1.84375	0.3	0.357143	8.8	1.1	0	1	0
siCAV1	3.2	siCAV1_Area_011	10.3281	64.1125	-1.71875	0.4	0.3125	8.8	1.1	0	1	0
siCAV1	3.5	siCAV1_Area_011	10.2031	63.3366	-0.125	0.3	0.285714	8.8	1.1	0	1	0
siCAV1	3.9	siCAV1_Area_011	9.21875	57.226	-0.984375	0.4	0.25641	8.8	1.1	0	1	0
siCAV1	4.2	siCAV1_Area_011	8.65625	53.7342	-0.5625	0.3	0.238095	8.8	1.1	0	1	0
siCAV1	4.6	siCAV1_Area_011	8.09375	50.2425	-0.5625	0.4	0.217391	8.8	1.1	0	1	0
siCAV1	4.9	siCAV1_Area_011	8.14062	50.5335	0.046875	0.3	0.204082	8.8	1.1	0	1	0
siCAV1	5.3	siCAV1_Area_011	6.76562	41.9981	-1.375	0.4	0.188679	8.8	1.1	0	1	0
siCAV1	5.6	siCAV1_Area_011	5.59375	34.7236	-1.17188	0.3	0.178571	8.8	1.1	0	1	0
siCAV1	6	siCAV1_Area_011	4.73438	29.3889	-0.859375	0.4	0.166667	8.8	1.1	0	1	0
siCAV1	6.3	siCAV1_Area_011	4.14062	25.7032	-0.59375	0.3	0.15873	8.8	1.1	0	1	0
siCAV1	6.7	siCAV1_Area_011	4.03125	25.0242	-0.109375	0.4	0.149254	8.8	1.1	0	1	0
siCAV1	7	siCAV1_Area_011	2.5625	15.9069	-1.46875	0.3	0.142857	8.8	1.1	0	1	0
siCAV1	7.4	siCAV1_Area_011	2.46875	15.3249	-0.09375	0.4	0.135135	8.8	1.1	0	1	0
siCAV1	7.7	siCAV1_Area_011	1.92188	11.9302	-0.546875	0.3	0.12987	8.8	1.1	0	1	0
siCAV1	8.1	siCAV1_Area_011	1.28125	7.95344	-0.640625	0.4	0.123457	8.8	1.1	0	1	0
siCAV1	8.4	siCAV1_Area_011	0.65625	4.07371	-0.625	0.3	0.119048	8.8	1.1	0	1	0
siCAV1	8.8	siCAV1_Area_011	0	0	-0.65625	0.4	0.113636	8.8	1.1	0	1	0
siCAV1	0.4	siCAV1_Area_012	0	0			2.5	2.8	1.1	0	1	0
siCAV1	1.1	siCAV1_Area_012	7.04688	100	7.04688	0.7	0.909091	2.8	1.1	0	1	0
siCAV1	1.4	siCAV1_Area_012	6.90625	98.0044	-0.140625	0.3	0.714286	2.8	1.1	0	1	0
siCAV1	1.8	siCAV1_Area_012	5.67188	80.4878	-1.23438	0.4	0.555556	2.8	1.1	0	1	0
siCAV1	2.1	siCAV1_Area_012	5.09375	72.2838	-0.578125	0.3	0.47619	2.8	1.1	0	1	0
siCAV1	2.8	siCAV1_Area_012	0	0	-5.09375	0.7	0.357143	2.8	1.1	0	1	0
siCAV1	0.4	siCAV1_Area_013	0	0			2.5	4.6	1.1	0	1	0
siCAV1	1.1	siCAV1_Area_013	6.375	100	6.375	0.7	0.909091	4.6	1.1	0	1	0
siCAV1	1.4	siCAV1_Area_013	5.48438	86.0294	-0.890625	0.3	0.714286	4.6	1.1	0	1	0
siCAV1	1.8	siCAV1_Area_013	5.46875	85.7843	-0.015625	0.4	0.555556	4.6	1.1	0	1	0
siCAV1	2.1	siCAV1_Area_013	4.67188	73.2843	-0.796875	0.3	0.47619	4.6	1.1	0	1	0
siCAV1	2.5	siCAV1_Area_013	3.54688	55.6373	-1.125	0.4	0.4	4.6	1.1	0	1	0
siCAV1	2.8	siCAV1_Area_013	2.35938	37.0098	-1.1875	0.3	0.357143	4.6	1.1	0	1	0
siCAV1	3.2	siCAV1_Area_013	1.70312	26.7157	-0.65625	0.4	0.3125	4.6	1.1	0	1	0
siCAV1	3.5	siCAV1_Area_013	1.39062	21.8137	-0.3125	0.3	0.285714	4.6	1.1	0	1	0
siCAV1	3.9	siCAV1_Area_013	0.875	13.7255	-0.515625	0.4	0.25641	4.6	1.1	0	1	0
siCAV1	4.2	siCAV1_Area_013	0.84375	13.2353	-0.03125	0.3	0.238095	4.6	1.1	0	1	0
siCAV1	4.6	siCAV1_Area_013	0	0	-0.84375	0.4	0.217391	4.6	1.1	0	1	0
siCAV1	0.4	siCAV1_Area_014	0	0			2.5	22.8	3.2	0	1	0
siCAV1	1.1	siCAV1_Area_014	313.812	79.9172	313.812	0.7	0.909091	22.8	3.2	0	1	0
siCAV1	1.4	siCAV1_Area_014	355.344	90.4938	41.5312	0.3	0.714286	22.8	3.2	0	1	0
siCAV1	1.8	siCAV1_Area_014	373.125	95.0221	17.7812	0.4	0.555556	22.8	3.2	0	1	0
siCAV1	2.1	siCAV1_Area_014	387.344	98.6431	14.2188	0.3	0.47619	22.8	3.2	0	1	0
siCAV1	2.5	siCAV1_Area_014	388.562	98.9535	1.21875	0.4	0.4	22.8	3.2	0	1	0
siCAV1	2.8	siCAV1_Area_014	392.344	99.9164	3.78125	0.3	0.357143	22.8	3.2	0	1	0
siCAV1	3.2	siCAV1_Area_014	392.672	100	0.328125	0.4	0.3125	22.8	3.2	0	1	0
siCAV1	3.5	siCAV1_Area_014	382.703	97.4613	-9.96875	0.3	0.285714	22.8	3.2	0	1	0
siCAV1	3.9	siCAV1_Area_014	375.859	95.7184	-6.84375	0.4	0.25641	22.8	3.2	0	1	0
siCAV1	4.2	siCAV1_Area_014	369.406	94.075	-6.45312	0.3	0.238095	22.8	3.2	0	1	0
siCAV1	4.6	siCAV1_Area_014	357.766	91.1106	-11.6406	0.4	0.217391	22.8	3.2	0	1	0
siCAV1	4.9	siCAV1_Area_014	350.609	89.2881	-7.15625	0.3	0.204082	22.8	3.2	0	1	0
siCAV1	5.3	siCAV1_Area_014	342.312	87.1752	-8.29688	0.4	0.188679	22.8	3.2	0	1	0
siCAV1	5.6	siCAV1_Area_014	332.891	84.7758	-9.42188	0.3	0.178571	22.8	3.2	0	1	0
siCAV1	6	siCAV1_Area_014	335.438	85.4244	2.54688	0.4	0.166667	22.8	3.2	0	1	0
siCAV1	6.3	siCAV1_Area_014	319.375	81.3338	-16.0625	0.3	0.15873	22.8	3.2	0	1	0
siCAV1	6.7	siCAV1_Area_014	289.641	73.7615	-29.7344	0.4	0.149254	22.8	3.2	0	1	0
siCAV1	7	siCAV1_Area_014	258.281	65.7753	-31.3594	0.3	0.142857	22.8	3.2	0	1	0
siCAV1	7.4	siCAV1_Area_014	250.938	63.9051	-7.34375	0.4	0.135135	22.8	3.2	0	1	0
siCAV1	7.7	siCAV1_Area_014	228.281	58.1354	-22.6562	0.3	0.12987	22.8	3.2	0	1	0
siCAV1	8.1	siCAV1_Area_014	208.031	52.9784	-20.25	0.4	0.123457	22.8	3.2	0	1	0
siCAV1	8.4	siCAV1_Area_014	196.297	49.9901	-11.7344	0.3	0.119048	22.8	3.2	0	1	0
siCAV1	8.8	siCAV1_Area_014	175.906	44.7973	-20.3906	0.4	0.113636	22.8	3.2	0	1	0
siCAV1	9.1	siCAV1_Area_014	147.078	37.4557	-28.8281	0.3	0.10989	22.8	3.2	0	1	0
siCAV1	9.5	siCAV1_Area_014	115.656	29.4537	-31.4219	0.4	0.105263	22.8	3.2	0	1	0
siCAV1	9.8	siCAV1_Area_014	116.969	29.7879	1.3125	0.3	0.102041	22.8	3.2	0	1	0
siCAV1	10.2	siCAV1_Area_014	87.5	22.2832	-29.4688	0.4	0.0980392	22.8	3.2	0	1	0
siCAV1	10.5	siCAV1_Area_014	83.9062	21.368	-3.59375	0.3	0.0952381	22.8	3.2	0	1	0
siCAV1	10.9	siCAV1_Area_014	70.4688	17.946	-13.4375	0.4	0.0917431	22.8	3.2	0	1	0
siCAV1	11.2	siCAV1_Area_014	50.125	12.7651	-20.3438	0.3	0.0892857	22.8	3.2	0	1	0
siCAV1	11.6	siCAV1_Area_014	41.25	10.505	-8.875	0.4	0.0862069	22.8	3.2	0	1	0
siCAV1	11.9	siCAV1_Area_014	34.8438	8.8735	-6.40625	0.3	0.0840336	22.8	3.2	0	1	0
siCAV1	12.3	siCAV1_Area_014	24.3125	6.19156	-10.5312	0.4	0.0813008	22.8	3.2	0	1	0
siCAV1	12.6	siCAV1_Area_014	20.0312	5.10127	-4.28125	0.3	0.0793651	22.8	3.2	0	1	0
siCAV1	13	siCAV1_Area_014	19.2031	4.89037	-0.828125	0.4	0.0769231	22.8	3.2	0	1	0
siCAV1	13.3	siCAV1_Area_014	21.375	5.44348	2.17188	0.3	0.075188	22.8	3.2	0	1	0
siCAV1	13.7	siCAV1_Area_014	19.9375	5.07739	-1.4375	0.4	0.0729927	22.8	3.2	0	1	0
siCAV1	14	siCAV1_Area_014	17.7969	4.53225	-2.14062	0.3	0.0714286	22.8	3.2	0	1	0
siCAV1	14.4	siCAV1_Area_014	15.5625	3.96323	-2.23438	0.4	0.0694444	22.8	3.2	0	1	0
siCAV1	14.7	siCAV1_Area_014	15.5938	3.97119	0.03125	0.3	0.0680272	22.8	3.2	0	1	0
siCAV1	15.1	siCAV1_Area_014	14.0938	3.58919	-1.5	0.4	0.0662252	22.8	3.2	0	1	0
siCAV1	15.4	siCAV1_Area_014	13.125	3.34249	-0.96875	0.3	0.0649351	22.8	3.2	0	1	0
siCAV1	15.8	siCAV1_Area_014	12.9531	3.29871	-0.171875	0.4	0.0632911	22.8	3.2	0	1	0
siCAV1	16.1	siCAV1_Area_014	12.2656	3.12363	-0.6875	0.3	0.0621118	22.8	3.2	0	1	0
siCAV1	16.5	siCAV1_Area_014	10.4844	2.67001	-1.78125	0.4	0.0606061	22.8	3.2	0	1	0
siCAV1	16.8	siCAV1_Area_014	9.48438	2.41534	-1	0.3	0.0595238	22.8	3.2	0	1	0
siCAV1	17.2	siCAV1_Area_014	7.89062	2.00947	-1.59375	0.4	0.0581395	22.8	3.2	0	1	0
siCAV1	17.5	siCAV1_Area_014	7.04688	1.7946	-0.84375	0.3	0.0571429	22.8	3.2	0	1	0
siCAV1	17.9	siCAV1_Area_014	6.39062	1.62747	-0.65625	0.4	0.0558659	22.8	3.2	0	1	0
siCAV1	18.2	siCAV1_Area_014	5.6875	1.44841	-0.703125	0.3	0.0549451	22.8	3.2	0	1	0
siCAV1	18.6	siCAV1_Area_014	4.14062	1.05447	-1.54688	0.4	0.0537634	22.8	3.2	0	1	0
siCAV1	18.9	siCAV1_Area_014	3.45312	0.879392	-0.6875	0.3	0.0529101	22.8	3.2	0	1	0
siCAV1	19.3	siCAV1_Area_014	3.1875	0.811746	-0.265625	0.4	0.0518135	22.8	3.2	0	1	0
siCAV1	19.6	siCAV1_Area_014	2.60938	0.664518	-0.578125	0.3	0.0510204	22.8	3.2	0	1	0
siCAV1	20	siCAV1_Area_014	2.28125	0.580956	-0.328125	0.4	0.05	22.8	3.2	0	1	0
siCAV1	20.3	siCAV1_Area_014	2.23438	0.569018	-0.046875	0.3	0.0492611	22.8	3.2	0	1	0
siCAV1	20.7	siCAV1_Area_014	1.65625	0.42179	-0.578125	0.4	0.0483092	22.8	3.2	0	1	0
siCAV1	21	siCAV1_Area_014	1.29688	0.330269	-0.359375	0.3	0.047619	22.8	3.2	0	1	0
siCAV1	22.8	siCAV1_Area_014	0	0	-1.29688	1.8	0.0438596	22.8	3.2	0	1	0
siCAV1	0.4	siCAV1_Area_015	0	0			2.5	7.7	1.8	0	1	0
siCAV1	1.1	siCAV1_Area_015	10.9531	97.6323	10.9531	0.7	0.909091	7.7	1.8	0	1	0
siCAV1	1.4	siCAV1_Area_015	10.7656	95.961	-0.1875	0.3	0.714286	7.7	1.8	0	1	0
siCAV1	1.8	siCAV1_Area_015	11.2188	100	0.453125	0.4	0.555556	7.7	1.8	0	1	0
siCAV1	2.1	siCAV1_Area_015	10.7188	95.5432	-0.5	0.3	0.47619	7.7	1.8	0	1	0
siCAV1	2.5	siCAV1_Area_015	8.9375	79.6657	-1.78125	0.4	0.4	7.7	1.8	0	1	0
siCAV1	2.8	siCAV1_Area_015	8.76562	78.1337	-0.171875	0.3	0.357143	7.7	1.8	0	1	0
siCAV1	3.2	siCAV1_Area_015	7.17188	63.9276	-1.59375	0.4	0.3125	7.7	1.8	0	1	0
siCAV1	3.5	siCAV1_Area_015	7.4375	66.2953	0.265625	0.3	0.285714	7.7	1.8	0	1	0
siCAV1	3.9	siCAV1_Area_015	7.75	69.0808	0.3125	0.4	0.25641	7.7	1.8	0	1	0
siCAV1	4.2	siCAV1_Area_015	7.48438	66.7131	-0.265625	0.3	0.238095	7.7	1.8	0	1	0
siCAV1	4.6	siCAV1_Area_015	6.65625	59.3315	-0.828125	0.4	0.217391	7.7	1.8	0	1	0
siCAV1	4.9	siCAV1_Area_015	3.95312	35.2368	-2.70312	0.3	0.204082	7.7	1.8	0	1	0
siCAV1	5.3	siCAV1_Area_015	3.53125	31.4763	-0.421875	0.4	0.188679	7.7	1.8	0	1	0
siCAV1	5.6	siCAV1_Area_015	4.3125	38.4401	0.78125	0.3	0.178571	7.7	1.8	0	1	0
siCAV1	6	siCAV1_Area_015	4.64062	41.3649	0.328125	0.4	0.166667	7.7	1.8	0	1	0
siCAV1	6.3	siCAV1_Area_015	4.59375	40.9471	-0.046875	0.3	0.15873	7.7	1.8	0	1	0
siCAV1	6.7	siCAV1_Area_015	2.73438	24.3733	-1.85938	0.4	0.149254	7.7	1.8	0	1	0
siCAV1	7	siCAV1_Area_015	1.9375	17.2702	-0.796875	0.3	0.142857	7.7	1.8	0	1	0
siCAV1	7.4	siCAV1_Area_015	0.546875	4.87465	-1.39062	0.4	0.135135	7.7	1.8	0	1	0
siCAV1	7.7	siCAV1_Area_015	0	0	-0.546875	0.3	0.12987	7.7	1.8	0	1	0
siCAV1	0.4	siCAV1_Area_016	0	0			2.5	9.1	1.4	0	1	0
siCAV1	1.1	siCAV1_Area_016	43.375	94.4539	43.375	0.7	0.909091	9.1	1.4	0	1	0
siCAV1	1.4	siCAV1_Area_016	45.9219	100	2.54688	0.3	0.714286	9.1	1.4	0	1	0
siCAV1	1.8	siCAV1_Area_016	44.0156	95.8489	-1.90625	0.4	0.555556	9.1	1.4	0	1	0
siCAV1	2.1	siCAV1_Area_016	39.2969	85.5733	-4.71875	0.3	0.47619	9.1	1.4	0	1	0
siCAV1	2.5	siCAV1_Area_016	35.0156	76.2504	-4.28125	0.4	0.4	9.1	1.4	0	1	0
siCAV1	2.8	siCAV1_Area_016	30.6406	66.7234	-4.375	0.3	0.357143	9.1	1.4	0	1	0
siCAV1	3.2	siCAV1_Area_016	25.7969	56.1756	-4.84375	0.4	0.3125	9.1	1.4	0	1	0
siCAV1	3.5	siCAV1_Area_016	23.4688	51.1058	-2.32812	0.3	0.285714	9.1	1.4	0	1	0
siCAV1	3.9	siCAV1_Area_016	19.9062	43.3481	-3.5625	0.4	0.25641	9.1	1.4	0	1	0
siCAV1	4.2	siCAV1_Area_016	16.9688	36.9513	-2.9375	0.3	0.238095	9.1	1.4	0	1	0
siCAV1	4.6	siCAV1_Area_016	14.8281	32.2899	-2.14062	0.4	0.217391	9.1	1.4	0	1	0
siCAV1	4.9	siCAV1_Area_016	13.0625	28.445	-1.76562	0.3	0.204082	9.1	1.4	0	1	0
siCAV1	5.3	siCAV1_Area_016	11.8125	25.723	-1.25	0.4	0.188679	9.1	1.4	0	1	0
siCAV1	5.6	siCAV1_Area_016	10.9375	23.8176	-0.875	0.3	0.178571	9.1	1.4	0	1	0
siCAV1	6	siCAV1_Area_016	8.17188	17.7952	-2.76562	0.4	0.166667	9.1	1.4	0	1	0
siCAV1	6.3	siCAV1_Area_016	6.32812	13.7802	-1.84375	0.3	0.15873	9.1	1.4	0	1	0
siCAV1	6.7	siCAV1_Area_016	4.17188	9.08472	-2.15625	0.4	0.149254	9.1	1.4	0	1	0
siCAV1	7	siCAV1_Area_016	3.65625	7.96189	-0.515625	0.3	0.142857	9.1	1.4	0	1	0
siCAV1	7.4	siCAV1_Area_016	1.85938	4.049	-1.79688	0.4	0.135135	9.1	1.4	0	1	0
siCAV1	7.7	siCAV1_Area_016	0.921875	2.00749	-0.9375	0.3	0.12987	9.1	1.4	0	1	0
siCAV1	9.1	siCAV1_Area_016	0	0	-0.921875	1.4	0.10989	9.1	1.4	0	1	0
siCAV1	0.4	siCAV1_Area_017	0	0			2.5	10.2	1.1	0	1	0
siCAV1	1.1	siCAV1_Area_017	12.625	100	12.625	0.7	0.909091	10.2	1.1	0	1	0
siCAV1	1.4	siCAV1_Area_017	10.8125	85.6436	-1.8125	0.3	0.714286	10.2	1.1	0	1	0
siCAV1	1.8	siCAV1_Area_017	11.2188	88.8614	0.40625	0.4	0.555556	10.2	1.1	0	1	0
siCAV1	2.1	siCAV1_Area_017	9.5625	75.7426	-1.65625	0.3	0.47619	10.2	1.1	0	1	0
siCAV1	2.5	siCAV1_Area_017	8.67188	68.6881	-0.890625	0.4	0.4	10.2	1.1	0	1	0
siCAV1	2.8	siCAV1_Area_017	7.125	56.4356	-1.54688	0.3	0.357143	10.2	1.1	0	1	0
siCAV1	3.2	siCAV1_Area_017	7.85938	62.2525	0.734375	0.4	0.3125	10.2	1.1	0	1	0
siCAV1	3.5	siCAV1_Area_017	7.46875	59.1584	-0.390625	0.3	0.285714	10.2	1.1	0	1	0
siCAV1	3.9	siCAV1_Area_017	6.92188	54.8267	-0.546875	0.4	0.25641	10.2	1.1	0	1	0
siCAV1	4.2	siCAV1_Area_017	6.625	52.4752	-0.296875	0.3	0.238095	10.2	1.1	0	1	0
siCAV1	4.6	siCAV1_Area_017	5.39062	42.698	-1.23438	0.4	0.217391	10.2	1.1	0	1	0
siCAV1	4.9	siCAV1_Area_017	4.125	32.6733	-1.26562	0.3	0.204082	10.2	1.1	0	1	0
siCAV1	5.3	siCAV1_Area_017	2.92188	23.1436	-1.20312	0.4	0.188679	10.2	1.1	0	1	0
siCAV1	5.6	siCAV1_Area_017	2.07812	16.4604	-0.84375	0.3	0.178571	10.2	1.1	0	1	0
siCAV1	6	siCAV1_Area_017	1.45312	11.5099	-0.625	0.4	0.166667	10.2	1.1	0	1	0
siCAV1	6.3	siCAV1_Area_017	1.1875	9.40594	-0.265625	0.3	0.15873	10.2	1.1	0	1	0
siCAV1	6.7	siCAV1_Area_017	1.14062	9.03465	-0.046875	0.4	0.149254	10.2	1.1	0	1	0
siCAV1	7	siCAV1_Area_017	1.03125	8.16832	-0.109375	0.3	0.142857	10.2	1.1	0	1	0
siCAV1	7.4	siCAV1_Area_017	1.10938	8.78713	0.078125	0.4	0.135135	10.2	1.1	0	1	0
siCAV1	7.7	siCAV1_Area_017	1.125	8.91089	0.015625	0.3	0.12987	10.2	1.1	0	1	0
siCAV1	8.1	siCAV1_Area_017	0.78125	6.18812	-0.34375	0.4	0.123457	10.2	1.1	0	1	0
siCAV1	8.4	siCAV1_Area_017	0.96875	7.67327	0.1875	0.3	0.119048	10.2	1.1	0	1	0
siCAV1	8.8	siCAV1_Area_017	0.875	6.93069	-0.09375	0.4	0.113636	10.2	1.1	0	1	0
siCAV1	9.1	siCAV1_Area_017	0.8125	6.43564	-0.0625	0.3	0.10989	10.2	1.1	0	1	0
siCAV1	9.5	siCAV1_Area_017	0.59375	4.70297	-0.21875	0.4	0.105263	10.2	1.1	0	1	0
siCAV1	10.2	siCAV1_Area_017	0	0	-0.59375	0.7	0.0980392	10.2	1.1	0	1	0
siCAV1	0.4	siCAV1_Area_018	0	0			2.5	11.9	0.7	0	1	0
siCAV1	0.7	siCAV1_Area_018	58.8594	100	58.8594	0.3	1.42857	11.9	0.7	0	1	0
siCAV1	1.1	siCAV1_Area_018	56.4531	95.9119	-2.40625	0.4	0.909091	11.9	0.7	0	1	0
siCAV1	1.4	siCAV1_Area_018	54.1094	91.9299	-2.34375	0.3	0.714286	11.9	0.7	0	1	0
siCAV1	1.8	siCAV1_Area_018	48.375	82.1874	-5.73438	0.4	0.555556	11.9	0.7	0	1	0
siCAV1	2.1	siCAV1_Area_018	45.9219	78.0196	-2.45312	0.3	0.47619	11.9	0.7	0	1	0
siCAV1	2.5	siCAV1_Area_018	44.3281	75.3119	-1.59375	0.4	0.4	11.9	0.7	0	1	0
siCAV1	2.8	siCAV1_Area_018	42	71.3565	-2.32812	0.3	0.357143	11.9	0.7	0	1	0
siCAV1	3.2	siCAV1_Area_018	41.9219	71.2238	-0.078125	0.4	0.3125	11.9	0.7	0	1	0
siCAV1	3.5	siCAV1_Area_018	39.8594	67.7197	-2.0625	0.3	0.285714	11.9	0.7	0	1	0
siCAV1	3.9	siCAV1_Area_018	36.9062	62.7024	-2.95312	0.4	0.25641	11.9	0.7	0	1	0
siCAV1	4.2	siCAV1_Area_018	35.0312	59.5169	-1.875	0.3	0.238095	11.9	0.7	0	1	0
siCAV1	4.6	siCAV1_Area_018	33.9688	57.7117	-1.0625	0.4	0.217391	11.9	0.7	0	1	0
siCAV1	4.9	siCAV1_Area_018	30.8438	52.4024	-3.125	0.3	0.204082	11.9	0.7	0	1	0
siCAV1	5.3	siCAV1_Area_018	28.0469	47.6507	-2.79688	0.4	0.188679	11.9	0.7	0	1	0
siCAV1	5.6	siCAV1_Area_018	26.4688	44.9695	-1.57812	0.3	0.178571	11.9	0.7	0	1	0
siCAV1	6	siCAV1_Area_018	23.8281	40.4831	-2.64062	0.4	0.166667	11.9	0.7	0	1	0
siCAV1	6.3	siCAV1_Area_018	22.2812	37.8551	-1.54688	0.3	0.15873	11.9	0.7	0	1	0
siCAV1	6.7	siCAV1_Area_018	20.1562	34.2448	-2.125	0.4	0.149254	11.9	0.7	0	1	0
siCAV1	7	siCAV1_Area_018	18.6562	31.6963	-1.5	0.3	0.142857	11.9	0.7	0	1	0
siCAV1	7.4	siCAV1_Area_018	16.0312	27.2365	-2.625	0.4	0.135135	11.9	0.7	0	1	0
siCAV1	7.7	siCAV1_Area_018	13.0312	22.1396	-3	0.3	0.12987	11.9	0.7	0	1	0
siCAV1	8.1	siCAV1_Area_018	10.7031	18.1842	-2.32812	0.4	0.123457	11.9	0.7	0	1	0
siCAV1	8.4	siCAV1_Area_018	8.03125	13.6448	-2.67188	0.3	0.119048	11.9	0.7	0	1	0
siCAV1	8.8	siCAV1_Area_018	5.1875	8.81338	-2.84375	0.4	0.113636	11.9	0.7	0	1	0
siCAV1	9.1	siCAV1_Area_018	4.34375	7.37988	-0.84375	0.3	0.10989	11.9	0.7	0	1	0
siCAV1	9.5	siCAV1_Area_018	3.53125	5.99947	-0.8125	0.4	0.105263	11.9	0.7	0	1	0
siCAV1	9.8	siCAV1_Area_018	3.64062	6.18529	0.109375	0.3	0.102041	11.9	0.7	0	1	0
siCAV1	10.2	siCAV1_Area_018	2.64062	4.48633	-1	0.4	0.0980392	11.9	0.7	0	1	0
siCAV1	10.5	siCAV1_Area_018	2.21875	3.76958	-0.421875	0.3	0.0952381	11.9	0.7	0	1	0
siCAV1	11.9	siCAV1_Area_018	0	0	-2.21875	1.4	0.0840336	11.9	0.7	0	1	0
siCAV1	0.4	siCAV1_Area_019	0	0			2.5	4.9	0.7	0	1	0
siCAV1	0.7	siCAV1_Area_019	51.5625	100	51.5625	0.3	1.42857	4.9	0.7	0	1	0
siCAV1	1.1	siCAV1_Area_019	50.4219	97.7879	-1.14062	0.4	0.909091	4.9	0.7	0	1	0
siCAV1	1.4	siCAV1_Area_019	48.125	93.3333	-2.29688	0.3	0.714286	4.9	0.7	0	1	0
siCAV1	1.8	siCAV1_Area_019	45.8281	88.8788	-2.29688	0.4	0.555556	4.9	0.7	0	1	0
siCAV1	2.1	siCAV1_Area_019	43.9688	85.2727	-1.85938	0.3	0.47619	4.9	0.7	0	1	0
siCAV1	2.5	siCAV1_Area_019	43	83.3939	-0.96875	0.4	0.4	4.9	0.7	0	1	0
siCAV1	2.8	siCAV1_Area_019	40.1562	77.8788	-2.84375	0.3	0.357143	4.9	0.7	0	1	0
siCAV1	3.2	siCAV1_Area_019	35.3906	68.6364	-4.76562	0.4	0.3125	4.9	0.7	0	1	0
siCAV1	3.5	siCAV1_Area_019	32.3125	62.6667	-3.07812	0.3	0.285714	4.9	0.7	0	1	0
siCAV1	3.9	siCAV1_Area_019	25.75	49.9394	-6.5625	0.4	0.25641	4.9	0.7	0	1	0
siCAV1	4.2	siCAV1_Area_019	14.7344	28.5758	-11.0156	0.3	0.238095	4.9	0.7	0	1	0
siCAV1	4.6	siCAV1_Area_019	4.53125	8.78788	-10.2031	0.4	0.217391	4.9	0.7	0	1	0
siCAV1	4.9	siCAV1_Area_019	0	0	-4.53125	0.3	0.204082	4.9	0.7	0	1	0
siCAV1	0.4	siCAV1_Area_020	0	0			2.5	10.5	0.7	0	1	0
siCAV1	0.7	siCAV1_Area_020	64.25	100	64.25	0.3	1.42857	10.5	0.7	0	1	0
siCAV1	1.1	siCAV1_Area_020	60.5	94.1634	-3.75	0.4	0.909091	10.5	0.7	0	1	0
siCAV1	1.4	siCAV1_Area_020	59.5469	92.68	-0.953125	0.3	0.714286	10.5	0.7	0	1	0
siCAV1	1.8	siCAV1_Area_020	57.7344	89.8589	-1.8125	0.4	0.555556	10.5	0.7	0	1	0
siCAV1	2.1	siCAV1_Area_020	54.1719	84.3142	-3.5625	0.3	0.47619	10.5	0.7	0	1	0
siCAV1	2.5	siCAV1_Area_020	51.0156	79.4018	-3.15625	0.4	0.4	10.5	0.7	0	1	0
siCAV1	2.8	siCAV1_Area_020	47.2656	73.5652	-3.75	0.3	0.357143	10.5	0.7	0	1	0
siCAV1	3.2	siCAV1_Area_020	45.1094	70.2091	-2.15625	0.4	0.3125	10.5	0.7	0	1	0
siCAV1	3.5	siCAV1_Area_020	41.3125	64.2996	-3.79688	0.3	0.285714	10.5	0.7	0	1	0
siCAV1	3.9	siCAV1_Area_020	37.7969	58.8278	-3.51562	0.4	0.25641	10.5	0.7	0	1	0
siCAV1	4.2	siCAV1_Area_020	30.3438	47.2276	-7.45312	0.3	0.238095	10.5	0.7	0	1	0
siCAV1	4.6	siCAV1_Area_020	25.4844	39.6644	-4.85938	0.4	0.217391	10.5	0.7	0	1	0
siCAV1	4.9	siCAV1_Area_020	21.8125	33.9494	-3.67188	0.3	0.204082	10.5	0.7	0	1	0
siCAV1	5.3	siCAV1_Area_020	18.3438	28.5506	-3.46875	0.4	0.188679	10.5	0.7	0	1	0
siCAV1	5.6	siCAV1_Area_020	15.9375	24.8054	-2.40625	0.3	0.178571	10.5	0.7	0	1	0
siCAV1	6	siCAV1_Area_020	12.2031	18.9932	-3.73438	0.4	0.166667	10.5	0.7	0	1	0
siCAV1	6.3	siCAV1_Area_020	8.75	13.6187	-3.45312	0.3	0.15873	10.5	0.7	0	1	0
siCAV1	6.7	siCAV1_Area_020	5.90625	9.19261	-2.84375	0.4	0.149254	10.5	0.7	0	1	0
siCAV1	7	siCAV1_Area_020	3.71875	5.78794	-2.1875	0.3	0.142857	10.5	0.7	0	1	0
siCAV1	7.4	siCAV1_Area_020	3.8125	5.93385	0.09375	0.4	0.135135	10.5	0.7	0	1	0
siCAV1	7.7	siCAV1_Area_020	2.84375	4.42607	-0.96875	0.3	0.12987	10.5	0.7	0	1	0
siCAV1	8.1	siCAV1_Area_020	2.35938	3.67218	-0.484375	0.4	0.123457	10.5	0.7	0	1	0
siCAV1	8.4	siCAV1_Area_020	1.96875	3.0642	-0.390625	0.3	0.119048	10.5	0.7	0	1	0
siCAV1	8.8	siCAV1_Area_020	1.45312	2.26167	-0.515625	0.4	0.113636	10.5	0.7	0	1	0
siCAV1	9.1	siCAV1_Area_020	1.03125	1.60506	-0.421875	0.3	0.10989	10.5	0.7	0	1	0
siCAV1	9.5	siCAV1_Area_020	0.671875	1.04572	-0.359375	0.4	0.105263	10.5	0.7	0	1	0
siCAV1	10.5	siCAV1_Area_020	0	0	-0.671875	1	0.0952381	10.5	0.7	0	1	0
siCAV1	0.4	siCAV1_Area_021	0	0			2.5	6.3	1.4	0	1	0
siCAV1	0.7	siCAV1_Area_021	101.703	93.9114	101.703	0.3	1.42857	6.3	1.4	0	1	0
siCAV1	1.1	siCAV1_Area_021	107.875	99.6104	6.17188	0.4	0.909091	6.3	1.4	0	1	0
siCAV1	1.4	siCAV1_Area_021	108.297	100	0.421875	0.3	0.714286	6.3	1.4	0	1	0
siCAV1	1.8	siCAV1_Area_021	103.078	95.1811	-5.21875	0.4	0.555556	6.3	1.4	0	1	0
siCAV1	2.1	siCAV1_Area_021	98.625	91.0691	-4.45312	0.3	0.47619	6.3	1.4	0	1	0
siCAV1	2.5	siCAV1_Area_021	93.0781	85.9472	-5.54688	0.4	0.4	6.3	1.4	0	1	0
siCAV1	2.8	siCAV1_Area_021	87.6719	80.9551	-5.40625	0.3	0.357143	6.3	1.4	0	1	0
siCAV1	3.2	siCAV1_Area_021	79.6094	73.5103	-8.0625	0.4	0.3125	6.3	1.4	0	1	0
siCAV1	3.5	siCAV1_Area_021	73.3594	67.7391	-6.25	0.3	0.285714	6.3	1.4	0	1	0
siCAV1	3.9	siCAV1_Area_021	58.5938	54.1047	-14.7656	0.4	0.25641	6.3	1.4	0	1	0
siCAV1	4.2	siCAV1_Area_021	47.625	43.9763	-10.9688	0.3	0.238095	6.3	1.4	0	1	0
siCAV1	4.6	siCAV1_Area_021	30.3281	28.0046	-17.2969	0.4	0.217391	6.3	1.4	0	1	0
siCAV1	4.9	siCAV1_Area_021	29.2812	27.0379	-1.04688	0.3	0.204082	6.3	1.4	0	1	0
siCAV1	5.3	siCAV1_Area_021	21.5625	19.9105	-7.71875	0.4	0.188679	6.3	1.4	0	1	0
siCAV1	5.6	siCAV1_Area_021	9.28125	8.57019	-12.2812	0.3	0.178571	6.3	1.4	0	1	0
siCAV1	6	siCAV1_Area_021	2.53125	2.33733	-6.75	0.4	0.166667	6.3	1.4	0	1	0
siCAV1	6.3	siCAV1_Area_021	0	0	-2.53125	0.3	0.15873	6.3	1.4	0	1	0
siCAV1	0.4	siCAV1_Area_022	0	0			2.5	13.3	1.4	0	1	0
siCAV1	0.7	siCAV1_Area_022	19.1875	89.4392	19.1875	0.3	1.42857	13.3	1.4	0	1	0
siCAV1	1.1	siCAV1_Area_022	21.0156	97.9607	1.82812	0.4	0.909091	13.3	1.4	0	1	0
siCAV1	1.4	siCAV1_Area_022	21.4531	100	0.4375	0.3	0.714286	13.3	1.4	0	1	0
siCAV1	1.8	siCAV1_Area_022	20.5625	95.8485	-0.890625	0.4	0.555556	13.3	1.4	0	1	0
siCAV1	2.1	siCAV1_Area_022	21.3125	99.3445	0.75	0.3	0.47619	13.3	1.4	0	1	0
siCAV1	2.5	siCAV1_Area_022	20.3906	95.0473	-0.921875	0.4	0.4	13.3	1.4	0	1	0
siCAV1	2.8	siCAV1_Area_022	18.6562	86.9629	-1.73438	0.3	0.357143	13.3	1.4	0	1	0
siCAV1	3.2	siCAV1_Area_022	19.1875	89.4392	0.53125	0.4	0.3125	13.3	1.4	0	1	0
siCAV1	3.5	siCAV1_Area_022	18.1875	84.7779	-1	0.3	0.285714	13.3	1.4	0	1	0
siCAV1	3.9	siCAV1_Area_022	17.2344	80.335	-0.953125	0.4	0.25641	13.3	1.4	0	1	0
siCAV1	4.2	siCAV1_Area_022	16.8125	78.3685	-0.421875	0.3	0.238095	13.3	1.4	0	1	0
siCAV1	4.6	siCAV1_Area_022	16.8281	78.4414	0.015625	0.4	0.217391	13.3	1.4	0	1	0
siCAV1	4.9	siCAV1_Area_022	14.3594	66.9337	-2.46875	0.3	0.204082	13.3	1.4	0	1	0
siCAV1	5.3	siCAV1_Area_022	12.9219	60.2331	-1.4375	0.4	0.188679	13.3	1.4	0	1	0
siCAV1	5.6	siCAV1_Area_022	12.3125	57.3926	-0.609375	0.3	0.178571	13.3	1.4	0	1	0
siCAV1	6	siCAV1_Area_022	10.1562	47.3416	-2.15625	0.4	0.166667	13.3	1.4	0	1	0
siCAV1	6.3	siCAV1_Area_022	10.875	50.6919	0.71875	0.3	0.15873	13.3	1.4	0	1	0
siCAV1	6.7	siCAV1_Area_022	8.875	41.3693	-2	0.4	0.149254	13.3	1.4	0	1	0
siCAV1	7	siCAV1_Area_022	7.82812	36.4894	-1.04688	0.3	0.142857	13.3	1.4	0	1	0
siCAV1	7.4	siCAV1_Area_022	6.65625	31.0269	-1.17188	0.4	0.135135	13.3	1.4	0	1	0
siCAV1	7.7	siCAV1_Area_022	5.64062	26.2928	-1.01562	0.3	0.12987	13.3	1.4	0	1	0
siCAV1	8.1	siCAV1_Area_022	6.23438	29.0605	0.59375	0.4	0.123457	13.3	1.4	0	1	0
siCAV1	8.4	siCAV1_Area_022	5.96875	27.8223	-0.265625	0.3	0.119048	13.3	1.4	0	1	0
siCAV1	8.8	siCAV1_Area_022	4.45312	20.7575	-1.51562	0.4	0.113636	13.3	1.4	0	1	0
siCAV1	9.1	siCAV1_Area_022	4.20312	19.5921	-0.25	0.3	0.10989	13.3	1.4	0	1	0
siCAV1	9.5	siCAV1_Area_022	3.53125	16.4603	-0.671875	0.4	0.105263	13.3	1.4	0	1	0
siCAV1	9.8	siCAV1_Area_022	3.15625	14.7123	-0.375	0.3	0.102041	13.3	1.4	0	1	0
siCAV1	10.2	siCAV1_Area_022	3.6875	17.1886	0.53125	0.4	0.0980392	13.3	1.4	0	1	0
siCAV1	10.5	siCAV1_Area_022	3.70312	17.2615	0.015625	0.3	0.0952381	13.3	1.4	0	1	0
siCAV1	10.9	siCAV1_Area_022	2.9375	13.6926	-0.765625	0.4	0.0917431	13.3	1.4	0	1	0
siCAV1	11.2	siCAV1_Area_022	2.09375	9.75965	-0.84375	0.3	0.0892857	13.3	1.4	0	1	0
siCAV1	11.6	siCAV1_Area_022	1.57812	7.35615	-0.515625	0.4	0.0862069	13.3	1.4	0	1	0
siCAV1	11.9	siCAV1_Area_022	1.53125	7.13765	-0.046875	0.3	0.0840336	13.3	1.4	0	1	0
siCAV1	12.3	siCAV1_Area_022	1.21875	5.68099	-0.3125	0.4	0.0813008	13.3	1.4	0	1	0
siCAV1	13.3	siCAV1_Area_022	0	0	-1.21875	1	0.075188	13.3	1.4	0	1	0
siCAV1	0.4	siCAV1_Area_023	0	0			2.5	8.4	1.1	0	1	0
siCAV1	1.1	siCAV1_Area_023	19.7969	100	19.7969	0.7	0.909091	8.4	1.1	0	1	0
siCAV1	1.4	siCAV1_Area_023	18.9688	95.8169	-0.828125	0.3	0.714286	8.4	1.1	0	1	0
siCAV1	1.8	siCAV1_Area_023	19.4688	98.3425	0.5	0.4	0.555556	8.4	1.1	0	1	0
siCAV1	2.1	siCAV1_Area_023	19.1875	96.9219	-0.28125	0.3	0.47619	8.4	1.1	0	1	0
siCAV1	2.5	siCAV1_Area_023	18.7969	94.9487	-0.390625	0.4	0.4	8.4	1.1	0	1	0
siCAV1	2.8	siCAV1_Area_023	17.2344	87.056	-1.5625	0.3	0.357143	8.4	1.1	0	1	0
siCAV1	3.2	siCAV1_Area_023	16.7969	84.8461	-0.4375	0.4	0.3125	8.4	1.1	0	1	0
siCAV1	3.5	siCAV1_Area_023	14.1094	71.2707	-2.6875	0.3	0.285714	8.4	1.1	0	1	0
siCAV1	3.9	siCAV1_Area_023	13.1094	66.2194	-1	0.4	0.25641	8.4	1.1	0	1	0
siCAV1	4.2	siCAV1_Area_023	11.3594	57.3796	-1.75	0.3	0.238095	8.4	1.1	0	1	0
siCAV1	4.6	siCAV1_Area_023	10.2812	51.9337	-1.07812	0.4	0.217391	8.4	1.1	0	1	0
siCAV1	4.9	siCAV1_Area_023	9.39062	47.4349	-0.890625	0.3	0.204082	8.4	1.1	0	1	0
siCAV1	5.3	siCAV1_Area_023	7.32812	37.0166	-2.0625	0.4	0.188679	8.4	1.1	0	1	0
siCAV1	5.6	siCAV1_Area_023	5.26562	26.5983	-2.0625	0.3	0.178571	8.4	1.1	0	1	0
siCAV1	6	siCAV1_Area_023	4.32812	21.8627	-0.9375	0.4	0.166667	8.4	1.1	0	1	0
siCAV1	6.3	siCAV1_Area_023	3.5625	17.9953	-0.765625	0.3	0.15873	8.4	1.1	0	1	0
siCAV1	6.7	siCAV1_Area_023	3.14062	15.8642	-0.421875	0.4	0.149254	8.4	1.1	0	1	0
siCAV1	7	siCAV1_Area_023	2.14062	10.8129	-1	0.3	0.142857	8.4	1.1	0	1	0
siCAV1	7.4	siCAV1_Area_023	1.40625	7.10339	-0.734375	0.4	0.135135	8.4	1.1	0	1	0
siCAV1	7.7	siCAV1_Area_023	0.90625	4.57774	-0.5	0.3	0.12987	8.4	1.1	0	1	0
siCAV1	8.1	siCAV1_Area_023	0.671875	3.39384	-0.234375	0.4	0.123457	8.4	1.1	0	1	0
siCAV1	8.4	siCAV1_Area_023	0	0	-0.671875	0.3	0.119048	8.4	1.1	0	1	0
siCAV1	0.4	siCAV1_Area_024	0	0			2.5	28.7	1.8	0	1	0
siCAV1	0.7	siCAV1_Area_024	138.859	63.8939	138.859	0.3	1.42857	28.7	1.8	0	1	0
siCAV1	1.1	siCAV1_Area_024	207.594	95.5209	68.7344	0.4	0.909091	28.7	1.8	0	1	0
siCAV1	1.4	siCAV1_Area_024	217.062	99.8778	9.46875	0.3	0.714286	28.7	1.8	0	1	0
siCAV1	1.8	siCAV1_Area_024	217.328	100	0.265625	0.4	0.555556	28.7	1.8	0	1	0
siCAV1	2.1	siCAV1_Area_024	215.906	99.3457	-1.42188	0.3	0.47619	28.7	1.8	0	1	0
siCAV1	2.5	siCAV1_Area_024	211.641	97.383	-4.26562	0.4	0.4	28.7	1.8	0	1	0
siCAV1	2.8	siCAV1_Area_024	209.766	96.5202	-1.875	0.3	0.357143	28.7	1.8	0	1	0
siCAV1	3.2	siCAV1_Area_024	200.891	92.4366	-8.875	0.4	0.3125	28.7	1.8	0	1	0
siCAV1	3.5	siCAV1_Area_024	192.359	88.511	-8.53125	0.3	0.285714	28.7	1.8	0	1	0
siCAV1	3.9	siCAV1_Area_024	183.609	84.4849	-8.75	0.4	0.25641	28.7	1.8	0	1	0
siCAV1	4.2	siCAV1_Area_024	155.469	71.5364	-28.1406	0.3	0.238095	28.7	1.8	0	1	0
siCAV1	4.6	siCAV1_Area_024	142.875	65.7416	-12.5938	0.4	0.217391	28.7	1.8	0	1	0
siCAV1	4.9	siCAV1_Area_024	119.75	55.101	-23.125	0.3	0.204082	28.7	1.8	0	1	0
siCAV1	5.3	siCAV1_Area_024	106.828	49.1552	-12.9219	0.4	0.188679	28.7	1.8	0	1	0
siCAV1	5.6	siCAV1_Area_024	97.2812	44.7624	-9.54688	0.3	0.178571	28.7	1.8	0	1	0
siCAV1	6	siCAV1_Area_024	85.1719	39.1905	-12.1094	0.4	0.166667	28.7	1.8	0	1	0
siCAV1	6.3	siCAV1_Area_024	69.7344	32.0871	-15.4375	0.3	0.15873	28.7	1.8	0	1	0
siCAV1	6.7	siCAV1_Area_024	57.2188	26.3283	-12.5156	0.4	0.149254	28.7	1.8	0	1	0
siCAV1	7	siCAV1_Area_024	41.5312	19.1099	-15.6875	0.3	0.142857	28.7	1.8	0	1	0
siCAV1	7.4	siCAV1_Area_024	26.5312	12.2079	-15	0.4	0.135135	28.7	1.8	0	1	0
siCAV1	7.7	siCAV1_Area_024	22.2969	10.2595	-4.23438	0.3	0.12987	28.7	1.8	0	1	0
siCAV1	8.1	siCAV1_Area_024	20.8438	9.59091	-1.45312	0.4	0.123457	28.7	1.8	0	1	0
siCAV1	8.4	siCAV1_Area_024	20.8438	9.59091	0	0.3	0.119048	28.7	1.8	0	1	0
siCAV1	8.8	siCAV1_Area_024	20.7969	9.56934	-0.046875	0.4	0.113636	28.7	1.8	0	1	0
siCAV1	9.1	siCAV1_Area_024	23.5781	10.8491	2.78125	0.3	0.10989	28.7	1.8	0	1	0
siCAV1	9.5	siCAV1_Area_024	24.1875	11.1295	0.609375	0.4	0.105263	28.7	1.8	0	1	0
siCAV1	9.8	siCAV1_Area_024	22.4375	10.3243	-1.75	0.3	0.102041	28.7	1.8	0	1	0
siCAV1	10.2	siCAV1_Area_024	21.5625	9.92163	-0.875	0.4	0.0980392	28.7	1.8	0	1	0
siCAV1	10.5	siCAV1_Area_024	20.1562	9.27457	-1.40625	0.3	0.0952381	28.7	1.8	0	1	0
siCAV1	10.9	siCAV1_Area_024	20	9.20267	-0.15625	0.4	0.0917431	28.7	1.8	0	1	0
siCAV1	11.2	siCAV1_Area_024	18.6719	8.59156	-1.32812	0.3	0.0892857	28.7	1.8	0	1	0
siCAV1	11.6	siCAV1_Area_024	16.6406	7.65691	-2.03125	0.4	0.0862069	28.7	1.8	0	1	0
siCAV1	11.9	siCAV1_Area_024	14.0625	6.47063	-2.57812	0.3	0.0840336	28.7	1.8	0	1	0
siCAV1	12.3	siCAV1_Area_024	11.2188	5.16213	-2.84375	0.4	0.0813008	28.7	1.8	0	1	0
siCAV1	12.6	siCAV1_Area_024	9.65625	4.44317	-1.5625	0.3	0.0793651	28.7	1.8	0	1	0
siCAV1	13	siCAV1_Area_024	8.85938	4.0765	-0.796875	0.4	0.0769231	28.7	1.8	0	1	0
siCAV1	13.3	siCAV1_Area_024	7.57812	3.48695	-1.28125	0.3	0.075188	28.7	1.8	0	1	0
siCAV1	13.7	siCAV1_Area_024	6.90625	3.1778	-0.671875	0.4	0.0729927	28.7	1.8	0	1	0
siCAV1	14	siCAV1_Area_024	6.84375	3.14904	-0.0625	0.3	0.0714286	28.7	1.8	0	1	0
siCAV1	14.4	siCAV1_Area_024	7.20312	3.3144	0.359375	0.4	0.0694444	28.7	1.8	0	1	0
siCAV1	14.7	siCAV1_Area_024	6.34375	2.91897	-0.859375	0.3	0.0680272	28.7	1.8	0	1	0
siCAV1	15.1	siCAV1_Area_024	5.8125	2.67453	-0.53125	0.4	0.0662252	28.7	1.8	0	1	0
siCAV1	15.4	siCAV1_Area_024	5.82812	2.68172	0.015625	0.3	0.0649351	28.7	1.8	0	1	0
siCAV1	15.8	siCAV1_Area_024	5.6875	2.61701	-0.140625	0.4	0.0632911	28.7	1.8	0	1	0
siCAV1	16.1	siCAV1_Area_024	5.03125	2.31505	-0.65625	0.3	0.0621118	28.7	1.8	0	1	0
siCAV1	16.5	siCAV1_Area_024	4.10938	1.89086	-0.921875	0.4	0.0606061	28.7	1.8	0	1	0
siCAV1	16.8	siCAV1_Area_024	4.3125	1.98433	0.203125	0.3	0.0595238	28.7	1.8	0	1	0
siCAV1	17.2	siCAV1_Area_024	4.71875	2.17126	0.40625	0.4	0.0581395	28.7	1.8	0	1	0
siCAV1	17.5	siCAV1_Area_024	5.03125	2.31505	0.3125	0.3	0.0571429	28.7	1.8	0	1	0
siCAV1	17.9	siCAV1_Area_024	5.42188	2.49479	0.390625	0.4	0.0558659	28.7	1.8	0	1	0
siCAV1	18.2	siCAV1_Area_024	4.90625	2.25753	-0.515625	0.3	0.0549451	28.7	1.8	0	1	0
siCAV1	18.6	siCAV1_Area_024	4.79688	2.2072	-0.109375	0.4	0.0537634	28.7	1.8	0	1	0
siCAV1	18.9	siCAV1_Area_024	4.26562	1.96276	-0.53125	0.3	0.0529101	28.7	1.8	0	1	0
siCAV1	19.3	siCAV1_Area_024	4.15625	1.91243	-0.109375	0.4	0.0518135	28.7	1.8	0	1	0
siCAV1	19.6	siCAV1_Area_024	4.4375	2.04184	0.28125	0.3	0.0510204	28.7	1.8	0	1	0
siCAV1	20	siCAV1_Area_024	4.14062	1.90524	-0.296875	0.4	0.05	28.7	1.8	0	1	0
siCAV1	20.3	siCAV1_Area_024	4	1.84053	-0.140625	0.3	0.0492611	28.7	1.8	0	1	0
siCAV1	20.7	siCAV1_Area_024	4.01562	1.84772	0.015625	0.4	0.0483092	28.7	1.8	0	1	0
siCAV1	21	siCAV1_Area_024	3.67188	1.68955	-0.34375	0.3	0.047619	28.7	1.8	0	1	0
siCAV1	21.4	siCAV1_Area_024	3.4375	1.58171	-0.234375	0.4	0.046729	28.7	1.8	0	1	0
siCAV1	28.7	siCAV1_Area_024	0	0	-3.4375	7.3	0.0348432	28.7	1.8	0	1	0
siCAV1	0.4	siCAV1_Area_025	0	0			2.5	9.5	6	0	1	0
siCAV1	1.4	siCAV1_Area_025	6.5625	73.4266	6.5625	1	0.714286	9.5	6	0	1	0
siCAV1	1.8	siCAV1_Area_025	6.0625	67.8322	-0.5	0.4	0.555556	9.5	6	0	1	0
siCAV1	2.1	siCAV1_Area_025	6.5	72.7273	0.4375	0.3	0.47619	9.5	6	0	1	0
siCAV1	2.5	siCAV1_Area_025	6.23438	69.7552	-0.265625	0.4	0.4	9.5	6	0	1	0
siCAV1	2.8	siCAV1_Area_025	5.73438	64.1608	-0.5	0.3	0.357143	9.5	6	0	1	0
siCAV1	3.2	siCAV1_Area_025	6.6875	74.8252	0.953125	0.4	0.3125	9.5	6	0	1	0
siCAV1	3.5	siCAV1_Area_025	6.5	72.7273	-0.1875	0.3	0.285714	9.5	6	0	1	0
siCAV1	3.9	siCAV1_Area_025	7.1875	80.4196	0.6875	0.4	0.25641	9.5	6	0	1	0
siCAV1	4.2	siCAV1_Area_025	6.71875	75.1748	-0.46875	0.3	0.238095	9.5	6	0	1	0
siCAV1	4.6	siCAV1_Area_025	7.5625	84.6154	0.84375	0.4	0.217391	9.5	6	0	1	0
siCAV1	4.9	siCAV1_Area_025	8.21875	91.958	0.65625	0.3	0.204082	9.5	6	0	1	0
siCAV1	5.3	siCAV1_Area_025	8.40625	94.0559	0.1875	0.4	0.188679	9.5	6	0	1	0
siCAV1	5.6	siCAV1_Area_025	8.5625	95.8042	0.15625	0.3	0.178571	9.5	6	0	1	0
siCAV1	6	siCAV1_Area_025	8.9375	100	0.375	0.4	0.166667	9.5	6	0	1	0
siCAV1	6.3	siCAV1_Area_025	8.10938	90.7343	-0.828125	0.3	0.15873	9.5	6	0	1	0
siCAV1	6.7	siCAV1_Area_025	7.07812	79.1958	-1.03125	0.4	0.149254	9.5	6	0	1	0
siCAV1	7	siCAV1_Area_025	7.28125	81.4685	0.203125	0.3	0.142857	9.5	6	0	1	0
siCAV1	7.4	siCAV1_Area_025	6.65625	74.4755	-0.625	0.4	0.135135	9.5	6	0	1	0
siCAV1	7.7	siCAV1_Area_025	5.65625	63.2867	-1	0.3	0.12987	9.5	6	0	1	0
siCAV1	8.1	siCAV1_Area_025	3.75	41.958	-1.90625	0.4	0.123457	9.5	6	0	1	0
siCAV1	8.4	siCAV1_Area_025	3.40625	38.1119	-0.34375	0.3	0.119048	9.5	6	0	1	0
siCAV1	8.8	siCAV1_Area_025	1.85938	20.8042	-1.54688	0.4	0.113636	9.5	6	0	1	0
siCAV1	9.5	siCAV1_Area_025	0	0	-1.85938	0.7	0.105263	9.5	6	0	1	0
siCAV1	0.4	siCAV1_Area_026	0	0			2.5	7	1.4	0	1	0
siCAV1	1.1	siCAV1_Area_026	34.0625	95.3214	34.0625	0.7	0.909091	7	1.4	0	1	0
siCAV1	1.4	siCAV1_Area_026	35.7344	100	1.67188	0.3	0.714286	7	1.4	0	1	0
siCAV1	1.8	siCAV1_Area_026	35.0312	98.0324	-0.703125	0.4	0.555556	7	1.4	0	1	0
siCAV1	2.1	siCAV1_Area_026	32.1719	90.0306	-2.85938	0.3	0.47619	7	1.4	0	1	0
siCAV1	2.5	siCAV1_Area_026	28.25	79.0555	-3.92188	0.4	0.4	7	1.4	0	1	0
siCAV1	2.8	siCAV1_Area_026	23.4688	65.6756	-4.78125	0.3	0.357143	7	1.4	0	1	0
siCAV1	3.2	siCAV1_Area_026	18.1094	50.6777	-5.35938	0.4	0.3125	7	1.4	0	1	0
siCAV1	3.5	siCAV1_Area_026	14.5312	40.6646	-3.57812	0.3	0.285714	7	1.4	0	1	0
siCAV1	3.9	siCAV1_Area_026	11.1562	31.2199	-3.375	0.4	0.25641	7	1.4	0	1	0
siCAV1	4.2	siCAV1_Area_026	9.15625	25.6231	-2	0.3	0.238095	7	1.4	0	1	0
siCAV1	4.6	siCAV1_Area_026	7.4375	20.8133	-1.71875	0.4	0.217391	7	1.4	0	1	0
siCAV1	4.9	siCAV1_Area_026	6.32812	17.7088	-1.10938	0.3	0.204082	7	1.4	0	1	0
siCAV1	5.3	siCAV1_Area_026	4.8125	13.4674	-1.51562	0.4	0.188679	7	1.4	0	1	0
siCAV1	5.6	siCAV1_Area_026	3.89062	10.8876	-0.921875	0.3	0.178571	7	1.4	0	1	0
siCAV1	6	siCAV1_Area_026	2.78125	7.78312	-1.10938	0.4	0.166667	7	1.4	0	1	0
siCAV1	7	siCAV1_Area_026	0	0	-2.78125	1	0.142857	7	1.4	0	1	0
siCAV1	0.4	siCAV1_Area_027	0	0			2.5	2.1	1.1	0	1	0
siCAV1	1.1	siCAV1_Area_027	9.46875	100	9.46875	0.7	0.909091	2.1	1.1	0	1	0
siCAV1	1.4	siCAV1_Area_027	5.5625	58.7459	-3.90625	0.3	0.714286	2.1	1.1	0	1	0
siCAV1	2.1	siCAV1_Area_027	0	0	-5.5625	0.7	0.47619	2.1	1.1	0	1	0
siCAV1	0.4	siCAV1_Area_028	0	0			2.5	12.3	1.4	0	1	0
siCAV1	1.1	siCAV1_Area_028	107.656	97.8554	107.656	0.7	0.909091	12.3	1.4	0	1	0
siCAV1	1.4	siCAV1_Area_028	110.016	100	2.35938	0.3	0.714286	12.3	1.4	0	1	0
siCAV1	1.8	siCAV1_Area_028	106.875	97.1453	-3.14062	0.4	0.555556	12.3	1.4	0	1	0
siCAV1	2.1	siCAV1_Area_028	100.344	91.2086	-6.53125	0.3	0.47619	12.3	1.4	0	1	0
siCAV1	2.5	siCAV1_Area_028	93.4219	84.9169	-6.92188	0.4	0.4	12.3	1.4	0	1	0
siCAV1	2.8	siCAV1_Area_028	93.9688	85.414	0.546875	0.3	0.357143	12.3	1.4	0	1	0
siCAV1	3.2	siCAV1_Area_028	91.5625	83.2268	-2.40625	0.4	0.3125	12.3	1.4	0	1	0
siCAV1	3.5	siCAV1_Area_028	90.1875	81.977	-1.375	0.3	0.285714	12.3	1.4	0	1	0
siCAV1	3.9	siCAV1_Area_028	88.5938	80.5283	-1.59375	0.4	0.25641	12.3	1.4	0	1	0
siCAV1	4.2	siCAV1_Area_028	82.4844	74.9751	-6.10938	0.3	0.238095	12.3	1.4	0	1	0
siCAV1	4.6	siCAV1_Area_028	72.25	65.6725	-10.2344	0.4	0.217391	12.3	1.4	0	1	0
siCAV1	4.9	siCAV1_Area_028	63.3125	57.5486	-8.9375	0.3	0.204082	12.3	1.4	0	1	0
siCAV1	5.3	siCAV1_Area_028	56	50.9019	-7.3125	0.4	0.188679	12.3	1.4	0	1	0
siCAV1	5.6	siCAV1_Area_028	53.8281	48.9277	-2.17188	0.3	0.178571	12.3	1.4	0	1	0
siCAV1	6	siCAV1_Area_028	53.0469	48.2176	-0.78125	0.4	0.166667	12.3	1.4	0	1	0
siCAV1	6.3	siCAV1_Area_028	51.2031	46.5417	-1.84375	0.3	0.15873	12.3	1.4	0	1	0
siCAV1	6.7	siCAV1_Area_028	47.8281	43.4739	-3.375	0.4	0.149254	12.3	1.4	0	1	0
siCAV1	7	siCAV1_Area_028	44.2969	40.2642	-3.53125	0.3	0.142857	12.3	1.4	0	1	0
siCAV1	7.4	siCAV1_Area_028	38	34.5405	-6.29688	0.4	0.135135	12.3	1.4	0	1	0
siCAV1	7.7	siCAV1_Area_028	28.125	25.5646	-9.875	0.3	0.12987	12.3	1.4	0	1	0
siCAV1	8.1	siCAV1_Area_028	21.1562	19.2302	-6.96875	0.4	0.123457	12.3	1.4	0	1	0
siCAV1	8.4	siCAV1_Area_028	15.2656	13.8759	-5.89062	0.3	0.119048	12.3	1.4	0	1	0
siCAV1	8.8	siCAV1_Area_028	9.84375	8.94759	-5.42188	0.4	0.113636	12.3	1.4	0	1	0
siCAV1	9.1	siCAV1_Area_028	7.92188	7.20068	-1.92188	0.3	0.10989	12.3	1.4	0	1	0
siCAV1	9.5	siCAV1_Area_028	10.3281	9.38787	2.40625	0.4	0.105263	12.3	1.4	0	1	0
siCAV1	9.8	siCAV1_Area_028	8.125	7.38531	-2.20312	0.3	0.102041	12.3	1.4	0	1	0
siCAV1	10.2	siCAV1_Area_028	7.85938	7.14387	-0.265625	0.4	0.0980392	12.3	1.4	0	1	0
siCAV1	10.5	siCAV1_Area_028	6.85938	6.23491	-1	0.3	0.0952381	12.3	1.4	0	1	0
siCAV1	10.9	siCAV1_Area_028	6.67188	6.06448	-0.1875	0.4	0.0917431	12.3	1.4	0	1	0
siCAV1	11.2	siCAV1_Area_028	5.25	4.77205	-1.42188	0.3	0.0892857	12.3	1.4	0	1	0
siCAV1	11.6	siCAV1_Area_028	1.9375	1.76111	-3.3125	0.4	0.0862069	12.3	1.4	0	1	0
siCAV1	12.3	siCAV1_Area_028	0	0	-1.9375	0.7	0.0813008	12.3	1.4	0	1	0
siCAV1	0.4	siCAV1_Area_029	0	0			2.5	4.2	1.1	0	1	0
siCAV1	1.1	siCAV1_Area_029	11.1406	100	11.1406	0.7	0.909091	4.2	1.1	0	1	0
siCAV1	1.4	siCAV1_Area_029	8.84375	79.3829	-2.29688	0.3	0.714286	4.2	1.1	0	1	0
siCAV1	1.8	siCAV1_Area_029	5.5	49.3689	-3.34375	0.4	0.555556	4.2	1.1	0	1	0
siCAV1	2.1	siCAV1_Area_029	2.59375	23.2819	-2.90625	0.3	0.47619	4.2	1.1	0	1	0
siCAV1	2.5	siCAV1_Area_029	1.53125	13.7447	-1.0625	0.4	0.4	4.2	1.1	0	1	0
siCAV1	2.8	siCAV1_Area_029	0.859375	7.71388	-0.671875	0.3	0.357143	4.2	1.1	0	1	0
siCAV1	4.2	siCAV1_Area_029	0	0	-0.859375	1.4	0.238095	4.2	1.1	0	1	0
siCAV1	0.4	siCAV1_Area_030	0	0			2.5	9.1	2.1	0	1	0
siCAV1	0.7	siCAV1_Area_030	125.922	69.2473	125.922	0.3	1.42857	9.1	2.1	0	1	0
siCAV1	1.1	siCAV1_Area_030	169.016	92.9455	43.0938	0.4	0.909091	9.1	2.1	0	1	0
siCAV1	1.4	siCAV1_Area_030	177.844	97.8003	8.82812	0.3	0.714286	9.1	2.1	0	1	0
siCAV1	1.8	siCAV1_Area_030	178.203	97.9979	0.359375	0.4	0.555556	9.1	2.1	0	1	0
siCAV1	2.1	siCAV1_Area_030	181.844	100	3.64062	0.3	0.47619	9.1	2.1	0	1	0
siCAV1	2.5	siCAV1_Area_030	181.844	100	0	0.4	0.4	9.1	2.1	0	1	0
siCAV1	2.8	siCAV1_Area_030	174.984	96.2279	-6.85938	0.3	0.357143	9.1	2.1	0	1	0
siCAV1	3.2	siCAV1_Area_030	167.422	92.0691	-7.5625	0.4	0.3125	9.1	2.1	0	1	0
siCAV1	3.5	siCAV1_Area_030	157.141	86.4152	-10.2812	0.3	0.285714	9.1	2.1	0	1	0
siCAV1	3.9	siCAV1_Area_030	142.812	78.5358	-14.3281	0.4	0.25641	9.1	2.1	0	1	0
siCAV1	4.2	siCAV1_Area_030	135.516	74.5231	-7.29688	0.3	0.238095	9.1	2.1	0	1	0
siCAV1	4.6	siCAV1_Area_030	126.922	69.7972	-8.59375	0.4	0.217391	9.1	2.1	0	1	0
siCAV1	4.9	siCAV1_Area_030	106.766	58.7128	-20.1562	0.3	0.204082	9.1	2.1	0	1	0
siCAV1	5.3	siCAV1_Area_030	84.0938	46.2451	-22.6719	0.4	0.188679	9.1	2.1	0	1	0
siCAV1	5.6	siCAV1_Area_030	75.4219	41.4762	-8.67188	0.3	0.178571	9.1	2.1	0	1	0
siCAV1	6	siCAV1_Area_030	74.3125	40.8661	-1.10938	0.4	0.166667	9.1	2.1	0	1	0
siCAV1	6.3	siCAV1_Area_030	69.9688	38.4774	-4.34375	0.3	0.15873	9.1	2.1	0	1	0
siCAV1	6.7	siCAV1_Area_030	62.5625	34.4045	-7.40625	0.4	0.149254	9.1	2.1	0	1	0
siCAV1	7	siCAV1_Area_030	54.0312	29.713	-8.53125	0.3	0.142857	9.1	2.1	0	1	0
siCAV1	7.4	siCAV1_Area_030	46.9844	25.8378	-7.04688	0.4	0.135135	9.1	2.1	0	1	0
siCAV1	7.7	siCAV1_Area_030	29.9844	16.4891	-17	0.3	0.12987	9.1	2.1	0	1	0
siCAV1	8.1	siCAV1_Area_030	7.39062	4.06427	-22.5938	0.4	0.123457	9.1	2.1	0	1	0
siCAV1	9.1	siCAV1_Area_030	0	0	-7.39062	1	0.10989	9.1	2.1	0	1	0
siCAV1	0.4	siCAV1_Area_031	0	0			2.5	10.2	2.8	0	1	0
siCAV1	1.1	siCAV1_Area_031	3.57812	58.1218	3.57812	0.7	0.909091	10.2	2.8	0	1	0
siCAV1	1.4	siCAV1_Area_031	4.375	71.066	0.796875	0.3	0.714286	10.2	2.8	0	1	0
siCAV1	1.8	siCAV1_Area_031	5.96875	96.9543	1.59375	0.4	0.555556	10.2	2.8	0	1	0
siCAV1	2.1	siCAV1_Area_031	5.84375	94.9239	-0.125	0.3	0.47619	10.2	2.8	0	1	0
siCAV1	2.5	siCAV1_Area_031	6.01562	97.7157	0.171875	0.4	0.4	10.2	2.8	0	1	0
siCAV1	2.8	siCAV1_Area_031	6.15625	100	0.140625	0.3	0.357143	10.2	2.8	0	1	0
siCAV1	3.2	siCAV1_Area_031	5.34375	86.802	-0.8125	0.4	0.3125	10.2	2.8	0	1	0
siCAV1	3.5	siCAV1_Area_031	6.0625	98.4772	0.71875	0.3	0.285714	10.2	2.8	0	1	0
siCAV1	3.9	siCAV1_Area_031	5.82812	94.6701	-0.234375	0.4	0.25641	10.2	2.8	0	1	0
siCAV1	4.2	siCAV1_Area_031	5.78125	93.9086	-0.046875	0.3	0.238095	10.2	2.8	0	1	0
siCAV1	4.6	siCAV1_Area_031	5.75	93.401	-0.03125	0.4	0.217391	10.2	2.8	0	1	0
siCAV1	4.9	siCAV1_Area_031	5.375	87.3096	-0.375	0.3	0.204082	10.2	2.8	0	1	0
siCAV1	5.3	siCAV1_Area_031	5.6875	92.3858	0.3125	0.4	0.188679	10.2	2.8	0	1	0
siCAV1	5.6	siCAV1_Area_031	5.34375	86.802	-0.34375	0.3	0.178571	10.2	2.8	0	1	0
siCAV1	6	siCAV1_Area_031	5	81.2183	-0.34375	0.4	0.166667	10.2	2.8	0	1	0
siCAV1	6.3	siCAV1_Area_031	3.21875	52.2843	-1.78125	0.3	0.15873	10.2	2.8	0	1	0
siCAV1	6.7	siCAV1_Area_031	2.375	38.5787	-0.84375	0.4	0.149254	10.2	2.8	0	1	0
siCAV1	10.2	siCAV1_Area_031	0	0	-2.375	3.5	0.0980392	10.2	2.8	0	1	0
siCAV1	0.4	siCAV1_Area_032	0	0			2.5	8.8	1.1	0	1	0
siCAV1	1.1	siCAV1_Area_032	40.4844	100	40.4844	0.7	0.909091	8.8	1.1	0	1	0
siCAV1	1.4	siCAV1_Area_032	39.8594	98.4562	-0.625	0.3	0.714286	8.8	1.1	0	1	0
siCAV1	1.8	siCAV1_Area_032	39.3125	97.1054	-0.546875	0.4	0.555556	8.8	1.1	0	1	0
siCAV1	2.1	siCAV1_Area_032	36.9531	91.2775	-2.35938	0.3	0.47619	8.8	1.1	0	1	0
siCAV1	2.5	siCAV1_Area_032	33.4531	82.6322	-3.5	0.4	0.4	8.8	1.1	0	1	0
siCAV1	2.8	siCAV1_Area_032	30.1094	74.3728	-3.34375	0.3	0.357143	8.8	1.1	0	1	0
siCAV1	3.2	siCAV1_Area_032	26.2656	64.8784	-3.84375	0.4	0.3125	8.8	1.1	0	1	0
siCAV1	3.5	siCAV1_Area_032	24.2969	60.0154	-1.96875	0.3	0.285714	8.8	1.1	0	1	0
siCAV1	3.9	siCAV1_Area_032	22	54.342	-2.29688	0.4	0.25641	8.8	1.1	0	1	0
siCAV1	4.2	siCAV1_Area_032	19.4062	47.9352	-2.59375	0.3	0.238095	8.8	1.1	0	1	0
siCAV1	4.6	siCAV1_Area_032	17.0469	42.1073	-2.35938	0.4	0.217391	8.8	1.1	0	1	0
siCAV1	4.9	siCAV1_Area_032	14.6875	36.2794	-2.35938	0.3	0.204082	8.8	1.1	0	1	0
siCAV1	5.3	siCAV1_Area_032	11.3594	28.0587	-3.32812	0.4	0.188679	8.8	1.1	0	1	0
siCAV1	5.6	siCAV1_Area_032	8.71875	21.5361	-2.64062	0.3	0.178571	8.8	1.1	0	1	0
siCAV1	6	siCAV1_Area_032	6.3125	15.5924	-2.40625	0.4	0.166667	8.8	1.1	0	1	0
siCAV1	6.3	siCAV1_Area_032	5.09375	12.582	-1.21875	0.3	0.15873	8.8	1.1	0	1	0
siCAV1	6.7	siCAV1_Area_032	3.625	8.95407	-1.46875	0.4	0.149254	8.8	1.1	0	1	0
siCAV1	8.8	siCAV1_Area_032	0	0	-3.625	2.1	0.113636	8.8	1.1	0	1	0
siCAV1	0.4	siCAV1_Area_033	0	0			2.5	5.6	2.1	0	1	0
siCAV1	1.1	siCAV1_Area_033	4.71875	98.0519	4.71875	0.7	0.909091	5.6	2.1	0	1	0
siCAV1	1.4	siCAV1_Area_033	4.23438	87.987	-0.484375	0.3	0.714286	5.6	2.1	0	1	0
siCAV1	1.8	siCAV1_Area_033	4.5625	94.8052	0.328125	0.4	0.555556	5.6	2.1	0	1	0
siCAV1	2.1	siCAV1_Area_033	4.8125	100	0.25	0.3	0.47619	5.6	2.1	0	1	0
siCAV1	2.5	siCAV1_Area_033	4.59375	95.4545	-0.21875	0.4	0.4	5.6	2.1	0	1	0
siCAV1	2.8	siCAV1_Area_033	3.5625	74.026	-1.03125	0.3	0.357143	5.6	2.1	0	1	0
siCAV1	3.2	siCAV1_Area_033	3.01562	62.6623	-0.546875	0.4	0.3125	5.6	2.1	0	1	0
siCAV1	3.5	siCAV1_Area_033	2.6875	55.8442	-0.328125	0.3	0.285714	5.6	2.1	0	1	0
siCAV1	3.9	siCAV1_Area_033	1.64062	34.0909	-1.04688	0.4	0.25641	5.6	2.1	0	1	0
siCAV1	5.6	siCAV1_Area_033	0	0	-1.64062	1.7	0.178571	5.6	2.1	0	1	0
siCAV1	0.4	siCAV1_Area_034	0	0			2.5	16.5	1.1	0	1	0
siCAV1	0.7	siCAV1_Area_034	23.7812	76.1381	23.7812	0.3	1.42857	16.5	1.1	0	1	0
siCAV1	1.1	siCAV1_Area_034	31.2344	100	7.45312	0.4	0.909091	16.5	1.1	0	1	0
siCAV1	1.4	siCAV1_Area_034	30.4062	97.3487	-0.828125	0.3	0.714286	16.5	1.1	0	1	0
siCAV1	1.8	siCAV1_Area_034	27.5781	88.2941	-2.82812	0.4	0.555556	16.5	1.1	0	1	0
siCAV1	2.1	siCAV1_Area_034	27.3125	87.4437	-0.265625	0.3	0.47619	16.5	1.1	0	1	0
siCAV1	2.5	siCAV1_Area_034	27.0312	86.5433	-0.28125	0.4	0.4	16.5	1.1	0	1	0
siCAV1	2.8	siCAV1_Area_034	28.2812	90.5453	1.25	0.3	0.357143	16.5	1.1	0	1	0
siCAV1	3.2	siCAV1_Area_034	27.4531	87.8939	-0.828125	0.4	0.3125	16.5	1.1	0	1	0
siCAV1	3.5	siCAV1_Area_034	26.9688	86.3432	-0.484375	0.3	0.285714	16.5	1.1	0	1	0
siCAV1	3.9	siCAV1_Area_034	25.7031	82.2911	-1.26562	0.4	0.25641	16.5	1.1	0	1	0
siCAV1	4.2	siCAV1_Area_034	24.3281	77.8889	-1.375	0.3	0.238095	16.5	1.1	0	1	0
siCAV1	4.6	siCAV1_Area_034	23.2188	74.3372	-1.10938	0.4	0.217391	16.5	1.1	0	1	0
siCAV1	4.9	siCAV1_Area_034	22	70.4352	-1.21875	0.3	0.204082	16.5	1.1	0	1	0
siCAV1	5.3	siCAV1_Area_034	19.4688	62.3312	-2.53125	0.4	0.188679	16.5	1.1	0	1	0
siCAV1	5.6	siCAV1_Area_034	17.4844	55.978	-1.98438	0.3	0.178571	16.5	1.1	0	1	0
siCAV1	6	siCAV1_Area_034	14.2188	45.5228	-3.26562	0.4	0.166667	16.5	1.1	0	1	0
siCAV1	6.3	siCAV1_Area_034	12.5938	40.3202	-1.625	0.3	0.15873	16.5	1.1	0	1	0
siCAV1	6.7	siCAV1_Area_034	11.2031	35.8679	-1.39062	0.4	0.149254	16.5	1.1	0	1	0
siCAV1	7	siCAV1_Area_034	10.5781	33.8669	-0.625	0.3	0.142857	16.5	1.1	0	1	0
siCAV1	7.4	siCAV1_Area_034	8.5625	27.4137	-2.01562	0.4	0.135135	16.5	1.1	0	1	0
siCAV1	7.7	siCAV1_Area_034	7.70312	24.6623	-0.859375	0.3	0.12987	16.5	1.1	0	1	0
siCAV1	8.1	siCAV1_Area_034	6.65625	21.3107	-1.04688	0.4	0.123457	16.5	1.1	0	1	0
siCAV1	8.4	siCAV1_Area_034	6.8125	21.8109	0.15625	0.3	0.119048	16.5	1.1	0	1	0
siCAV1	8.8	siCAV1_Area_034	6.54688	20.9605	-0.265625	0.4	0.113636	16.5	1.1	0	1	0
siCAV1	9.1	siCAV1_Area_034	6.4375	20.6103	-0.109375	0.3	0.10989	16.5	1.1	0	1	0
siCAV1	9.5	siCAV1_Area_034	6.0625	19.4097	-0.375	0.4	0.105263	16.5	1.1	0	1	0
siCAV1	9.8	siCAV1_Area_034	5.57812	17.8589	-0.484375	0.3	0.102041	16.5	1.1	0	1	0
siCAV1	10.2	siCAV1_Area_034	5.54688	17.7589	-0.03125	0.4	0.0980392	16.5	1.1	0	1	0
siCAV1	10.5	siCAV1_Area_034	5.10938	16.3582	-0.4375	0.3	0.0952381	16.5	1.1	0	1	0
siCAV1	10.9	siCAV1_Area_034	4.35938	13.957	-0.75	0.4	0.0917431	16.5	1.1	0	1	0
siCAV1	11.2	siCAV1_Area_034	3.82812	12.2561	-0.53125	0.3	0.0892857	16.5	1.1	0	1	0
siCAV1	11.6	siCAV1_Area_034	3.20312	10.2551	-0.625	0.4	0.0862069	16.5	1.1	0	1	0
siCAV1	11.9	siCAV1_Area_034	2.96875	9.50475	-0.234375	0.3	0.0840336	16.5	1.1	0	1	0
siCAV1	12.3	siCAV1_Area_034	3.23438	10.3552	0.265625	0.4	0.0813008	16.5	1.1	0	1	0
siCAV1	12.6	siCAV1_Area_034	3.29688	10.5553	0.0625	0.3	0.0793651	16.5	1.1	0	1	0
siCAV1	13	siCAV1_Area_034	2.45312	7.85393	-0.84375	0.4	0.0769231	16.5	1.1	0	1	0
siCAV1	13.3	siCAV1_Area_034	2.29688	7.35368	-0.15625	0.3	0.075188	16.5	1.1	0	1	0
siCAV1	13.7	siCAV1_Area_034	2.07812	6.65333	-0.21875	0.4	0.0729927	16.5	1.1	0	1	0
siCAV1	14	siCAV1_Area_034	2.03125	6.50325	-0.046875	0.3	0.0714286	16.5	1.1	0	1	0
siCAV1	14.4	siCAV1_Area_034	1.78125	5.70285	-0.25	0.4	0.0694444	16.5	1.1	0	1	0
siCAV1	14.7	siCAV1_Area_034	1.4375	4.6023	-0.34375	0.3	0.0680272	16.5	1.1	0	1	0
siCAV1	15.1	siCAV1_Area_034	1.4375	4.6023	0	0.4	0.0662252	16.5	1.1	0	1	0
siCAV1	16.5	siCAV1_Area_034	0	0	-1.4375	1.4	0.0606061	16.5	1.1	0	1	0
siCAV1	0.4	siCAV1_Area_035	0	0			2.5	10.5	0.7	0	1	0
siCAV1	0.7	siCAV1_Area_035	22.25	100	22.25	0.3	1.42857	10.5	0.7	0	1	0
siCAV1	1.1	siCAV1_Area_035	19.2656	86.5871	-2.98438	0.4	0.909091	10.5	0.7	0	1	0
siCAV1	1.4	siCAV1_Area_035	17.1875	77.2472	-2.07812	0.3	0.714286	10.5	0.7	0	1	0
siCAV1	1.8	siCAV1_Area_035	16.125	72.4719	-1.0625	0.4	0.555556	10.5	0.7	0	1	0
siCAV1	2.1	siCAV1_Area_035	15.5781	70.014	-0.546875	0.3	0.47619	10.5	0.7	0	1	0
siCAV1	2.5	siCAV1_Area_035	16.5938	74.5787	1.01562	0.4	0.4	10.5	0.7	0	1	0
siCAV1	2.8	siCAV1_Area_035	16.5781	74.5084	-0.015625	0.3	0.357143	10.5	0.7	0	1	0
siCAV1	3.2	siCAV1_Area_035	15.9219	71.559	-0.65625	0.4	0.3125	10.5	0.7	0	1	0
siCAV1	3.5	siCAV1_Area_035	14.5938	65.5899	-1.32812	0.3	0.285714	10.5	0.7	0	1	0
siCAV1	3.9	siCAV1_Area_035	12.0312	54.073	-2.5625	0.4	0.25641	10.5	0.7	0	1	0
siCAV1	4.2	siCAV1_Area_035	9.5625	42.9775	-2.46875	0.3	0.238095	10.5	0.7	0	1	0
siCAV1	4.6	siCAV1_Area_035	6.79688	30.5478	-2.76562	0.4	0.217391	10.5	0.7	0	1	0
siCAV1	4.9	siCAV1_Area_035	3.4375	15.4494	-3.35938	0.3	0.204082	10.5	0.7	0	1	0
siCAV1	5.3	siCAV1_Area_035	2.98438	13.4129	-0.453125	0.4	0.188679	10.5	0.7	0	1	0
siCAV1	5.6	siCAV1_Area_035	1.34375	6.03933	-1.64062	0.3	0.178571	10.5	0.7	0	1	0
siCAV1	6	siCAV1_Area_035	1.07812	4.84551	-0.265625	0.4	0.166667	10.5	0.7	0	1	0
siCAV1	6.3	siCAV1_Area_035	1.09375	4.91573	0.015625	0.3	0.15873	10.5	0.7	0	1	0
siCAV1	10.5	siCAV1_Area_035	0	0	-1.09375	4.2	0.0952381	10.5	0.7	0	1	0
siCAV1	0.4	siCAV1_Area_036	0	0			2.5	6.7	2.1	0	1	0
siCAV1	0.7	siCAV1_Area_036	65.7656	83.7779	65.7656	0.3	1.42857	6.7	2.1	0	1	0
siCAV1	1.1	siCAV1_Area_036	75.2812	95.8997	9.51562	0.4	0.909091	6.7	2.1	0	1	0
siCAV1	1.4	siCAV1_Area_036	74.875	95.3822	-0.40625	0.3	0.714286	6.7	2.1	0	1	0
siCAV1	1.8	siCAV1_Area_036	78.4062	99.8806	3.53125	0.4	0.555556	6.7	2.1	0	1	0
siCAV1	2.1	siCAV1_Area_036	78.5	100	0.09375	0.3	0.47619	6.7	2.1	0	1	0
siCAV1	2.5	siCAV1_Area_036	76.6562	97.6513	-1.84375	0.4	0.4	6.7	2.1	0	1	0
siCAV1	2.8	siCAV1_Area_036	70.6406	89.9881	-6.01562	0.3	0.357143	6.7	2.1	0	1	0
siCAV1	3.2	siCAV1_Area_036	65.5781	83.539	-5.0625	0.4	0.3125	6.7	2.1	0	1	0
siCAV1	3.5	siCAV1_Area_036	55.1875	70.3025	-10.3906	0.3	0.285714	6.7	2.1	0	1	0
siCAV1	3.9	siCAV1_Area_036	52.625	67.0382	-2.5625	0.4	0.25641	6.7	2.1	0	1	0
siCAV1	4.2	siCAV1_Area_036	48.7656	62.1218	-3.85938	0.3	0.238095	6.7	2.1	0	1	0
siCAV1	4.6	siCAV1_Area_036	43.0469	54.8368	-5.71875	0.4	0.217391	6.7	2.1	0	1	0
siCAV1	4.9	siCAV1_Area_036	44.2656	56.3893	1.21875	0.3	0.204082	6.7	2.1	0	1	0
siCAV1	5.3	siCAV1_Area_036	36.8906	46.9944	-7.375	0.4	0.188679	6.7	2.1	0	1	0
siCAV1	5.6	siCAV1_Area_036	28.8281	36.7237	-8.0625	0.3	0.178571	6.7	2.1	0	1	0
siCAV1	6	siCAV1_Area_036	20.375	25.9554	-8.45312	0.4	0.166667	6.7	2.1	0	1	0
siCAV1	6.7	siCAV1_Area_036	0	0	-20.375	0.7	0.149254	6.7	2.1	0	1	0
siCAV1	0.4	siCAV1_Area_037	0	0			2.5	17.2	1.1	0	1	0
siCAV1	0.7	siCAV1_Area_037	99.6094	94.2629	99.6094	0.3	1.42857	17.2	1.1	0	1	0
siCAV1	1.1	siCAV1_Area_037	105.672	100	6.0625	0.4	0.909091	17.2	1.1	0	1	0
siCAV1	1.4	siCAV1_Area_037	105.672	100	0	0.3	0.714286	17.2	1.1	0	1	0
siCAV1	1.8	siCAV1_Area_037	105.172	99.5268	-0.5	0.4	0.555556	17.2	1.1	0	1	0
siCAV1	2.1	siCAV1_Area_037	103.969	98.3883	-1.20312	0.3	0.47619	17.2	1.1	0	1	0
siCAV1	2.5	siCAV1_Area_037	101.672	96.2147	-2.29688	0.4	0.4	17.2	1.1	0	1	0
siCAV1	2.8	siCAV1_Area_037	100.562	95.1649	-1.10938	0.3	0.357143	17.2	1.1	0	1	0
siCAV1	3.2	siCAV1_Area_037	99.0156	93.701	-1.54688	0.4	0.3125	17.2	1.1	0	1	0
siCAV1	3.5	siCAV1_Area_037	96.3281	91.1578	-2.6875	0.3	0.285714	17.2	1.1	0	1	0
siCAV1	3.9	siCAV1_Area_037	95.4375	90.3149	-0.890625	0.4	0.25641	17.2	1.1	0	1	0
siCAV1	4.2	siCAV1_Area_037	93.0469	88.0526	-2.39062	0.3	0.238095	17.2	1.1	0	1	0
siCAV1	4.6	siCAV1_Area_037	91.8438	86.9141	-1.20312	0.4	0.217391	17.2	1.1	0	1	0
siCAV1	4.9	siCAV1_Area_037	85.4688	80.8813	-6.375	0.3	0.204082	17.2	1.1	0	1	0
siCAV1	5.3	siCAV1_Area_037	78.5781	74.3605	-6.89062	0.4	0.188679	17.2	1.1	0	1	0
siCAV1	5.6	siCAV1_Area_037	74.4688	70.4717	-4.10938	0.3	0.178571	17.2	1.1	0	1	0
siCAV1	6	siCAV1_Area_037	70.4844	66.7012	-3.98438	0.4	0.166667	17.2	1.1	0	1	0
siCAV1	6.3	siCAV1_Area_037	65.8594	62.3244	-4.625	0.3	0.15873	17.2	1.1	0	1	0
siCAV1	6.7	siCAV1_Area_037	64.0625	60.624	-1.79688	0.4	0.149254	17.2	1.1	0	1	0
siCAV1	7	siCAV1_Area_037	62.1406	58.8053	-1.92188	0.3	0.142857	17.2	1.1	0	1	0
siCAV1	7.4	siCAV1_Area_037	60.4219	57.1788	-1.71875	0.4	0.135135	17.2	1.1	0	1	0
siCAV1	7.7	siCAV1_Area_037	57.0469	53.9849	-3.375	0.3	0.12987	17.2	1.1	0	1	0
siCAV1	8.1	siCAV1_Area_037	54.375	51.4565	-2.67188	0.4	0.123457	17.2	1.1	0	1	0
siCAV1	8.4	siCAV1_Area_037	50.8594	48.1295	-3.51562	0.3	0.119048	17.2	1.1	0	1	0
siCAV1	8.8	siCAV1_Area_037	48.8438	46.2221	-2.01562	0.4	0.113636	17.2	1.1	0	1	0
siCAV1	9.1	siCAV1_Area_037	48.1719	45.5863	-0.671875	0.3	0.10989	17.2	1.1	0	1	0
siCAV1	9.5	siCAV1_Area_037	45.375	42.9395	-2.79688	0.4	0.105263	17.2	1.1	0	1	0
siCAV1	9.8	siCAV1_Area_037	40.9219	38.7254	-4.45312	0.3	0.102041	17.2	1.1	0	1	0
siCAV1	10.2	siCAV1_Area_037	37.625	35.6055	-3.29688	0.4	0.0980392	17.2	1.1	0	1	0
siCAV1	10.5	siCAV1_Area_037	32.9375	31.1696	-4.6875	0.3	0.0952381	17.2	1.1	0	1	0
siCAV1	10.9	siCAV1_Area_037	30.6562	29.0108	-2.28125	0.4	0.0917431	17.2	1.1	0	1	0
siCAV1	11.2	siCAV1_Area_037	27.9062	26.4084	-2.75	0.3	0.0892857	17.2	1.1	0	1	0
siCAV1	11.6	siCAV1_Area_037	24.5938	23.2737	-3.3125	0.4	0.0862069	17.2	1.1	0	1	0
siCAV1	11.9	siCAV1_Area_037	20.1875	19.1039	-4.40625	0.3	0.0840336	17.2	1.1	0	1	0
siCAV1	12.3	siCAV1_Area_037	16.9219	16.0136	-3.26562	0.4	0.0813008	17.2	1.1	0	1	0
siCAV1	12.6	siCAV1_Area_037	14.2656	13.4999	-2.65625	0.3	0.0793651	17.2	1.1	0	1	0
siCAV1	13	siCAV1_Area_037	12.7344	12.0509	-1.53125	0.4	0.0769231	17.2	1.1	0	1	0
siCAV1	13.3	siCAV1_Area_037	10.8594	10.2765	-1.875	0.3	0.075188	17.2	1.1	0	1	0
siCAV1	13.7	siCAV1_Area_037	8.54688	8.08813	-2.3125	0.4	0.0729927	17.2	1.1	0	1	0
siCAV1	14	siCAV1_Area_037	7.14062	6.75736	-1.40625	0.3	0.0714286	17.2	1.1	0	1	0
siCAV1	14.4	siCAV1_Area_037	5.875	5.55966	-1.26562	0.4	0.0694444	17.2	1.1	0	1	0
siCAV1	14.7	siCAV1_Area_037	4.40625	4.16975	-1.46875	0.3	0.0680272	17.2	1.1	0	1	0
siCAV1	15.1	siCAV1_Area_037	3.57812	3.38607	-0.828125	0.4	0.0662252	17.2	1.1	0	1	0
siCAV1	15.4	siCAV1_Area_037	2.21875	2.09966	-1.35938	0.3	0.0649351	17.2	1.1	0	1	0
siCAV1	15.8	siCAV1_Area_037	1.46875	1.38992	-0.75	0.4	0.0632911	17.2	1.1	0	1	0
siCAV1	16.1	siCAV1_Area_037	0.8125	0.76889	-0.65625	0.3	0.0621118	17.2	1.1	0	1	0
siCAV1	16.5	siCAV1_Area_037	0.65625	0.621026	-0.15625	0.4	0.0606061	17.2	1.1	0	1	0
siCAV1	17.2	siCAV1_Area_037	0	0	-0.65625	0.7	0.0581395	17.2	1.1	0	1	0
siCAV1	0.4	siCAV1_Area_038	0	0			2.5	6	1.4	0	1	0
siCAV1	0.7	siCAV1_Area_038	34.3594	91.3206	34.3594	0.3	1.42857	6	1.4	0	1	0
siCAV1	1.1	siCAV1_Area_038	37.2812	99.0864	2.92188	0.4	0.909091	6	1.4	0	1	0
siCAV1	1.4	siCAV1_Area_038	37.625	100	0.34375	0.3	0.714286	6	1.4	0	1	0
siCAV1	1.8	siCAV1_Area_038	37.2656	99.0449	-0.359375	0.4	0.555556	6	1.4	0	1	0
siCAV1	2.1	siCAV1_Area_038	36.4375	96.8439	-0.828125	0.3	0.47619	6	1.4	0	1	0
siCAV1	2.5	siCAV1_Area_038	34.9375	92.8571	-1.5	0.4	0.4	6	1.4	0	1	0
siCAV1	2.8	siCAV1_Area_038	34.3438	91.2791	-0.59375	0.3	0.357143	6	1.4	0	1	0
siCAV1	3.2	siCAV1_Area_038	34.5312	91.7774	0.1875	0.4	0.3125	6	1.4	0	1	0
siCAV1	3.5	siCAV1_Area_038	32.3281	85.9219	-2.20312	0.3	0.285714	6	1.4	0	1	0
siCAV1	3.9	siCAV1_Area_038	22.6094	60.0914	-9.71875	0.4	0.25641	6	1.4	0	1	0
siCAV1	4.2	siCAV1_Area_038	15.2656	40.5731	-7.34375	0.3	0.238095	6	1.4	0	1	0
siCAV1	4.6	siCAV1_Area_038	12.8594	34.1777	-2.40625	0.4	0.217391	6	1.4	0	1	0
siCAV1	4.9	siCAV1_Area_038	11.9531	31.7691	-0.90625	0.3	0.204082	6	1.4	0	1	0
siCAV1	5.3	siCAV1_Area_038	8.09375	21.5116	-3.85938	0.4	0.188679	6	1.4	0	1	0
siCAV1	5.6	siCAV1_Area_038	5.15625	13.7043	-2.9375	0.3	0.178571	6	1.4	0	1	0
siCAV1	6	siCAV1_Area_038	0	0	-5.15625	0.4	0.166667	6	1.4	0	1	0
siCAV1	0.4	siCAV1_Area_039	0	0			2.5	21.7	1.4	0	1	0
siCAV1	1.1	siCAV1_Area_039	20.625	91.6031	20.625	0.7	0.909091	21.7	1.4	0	1	0
siCAV1	1.4	siCAV1_Area_039	22.5156	100	1.89062	0.3	0.714286	21.7	1.4	0	1	0
siCAV1	1.8	siCAV1_Area_039	22.3594	99.306	-0.15625	0.4	0.555556	21.7	1.4	0	1	0
siCAV1	2.1	siCAV1_Area_039	22.2344	98.7509	-0.125	0.3	0.47619	21.7	1.4	0	1	0
siCAV1	2.5	siCAV1_Area_039	20.8281	92.5052	-1.40625	0.4	0.4	21.7	1.4	0	1	0
siCAV1	2.8	siCAV1_Area_039	20.2344	89.8681	-0.59375	0.3	0.357143	21.7	1.4	0	1	0
siCAV1	3.2	siCAV1_Area_039	17.5469	77.932	-2.6875	0.4	0.3125	21.7	1.4	0	1	0
siCAV1	3.5	siCAV1_Area_039	16.0625	71.3393	-1.48438	0.3	0.285714	21.7	1.4	0	1	0
siCAV1	3.9	siCAV1_Area_039	14.6562	65.0937	-1.40625	0.4	0.25641	21.7	1.4	0	1	0
siCAV1	4.2	siCAV1_Area_039	12.9375	57.4601	-1.71875	0.3	0.238095	21.7	1.4	0	1	0
siCAV1	4.6	siCAV1_Area_039	11.3281	50.3123	-1.60938	0.4	0.217391	21.7	1.4	0	1	0
siCAV1	4.9	siCAV1_Area_039	10.7344	47.6752	-0.59375	0.3	0.204082	21.7	1.4	0	1	0
siCAV1	5.3	siCAV1_Area_039	10.0938	44.83	-0.640625	0.4	0.188679	21.7	1.4	0	1	0
siCAV1	5.6	siCAV1_Area_039	9.04688	40.1804	-1.04688	0.3	0.178571	21.7	1.4	0	1	0
siCAV1	6	siCAV1_Area_039	8.125	36.0861	-0.921875	0.4	0.166667	21.7	1.4	0	1	0
siCAV1	6.3	siCAV1_Area_039	7.73438	34.3511	-0.390625	0.3	0.15873	21.7	1.4	0	1	0
siCAV1	6.7	siCAV1_Area_039	6.90625	30.6731	-0.828125	0.4	0.149254	21.7	1.4	0	1	0
siCAV1	7	siCAV1_Area_039	6.3125	28.0361	-0.59375	0.3	0.142857	21.7	1.4	0	1	0
siCAV1	7.4	siCAV1_Area_039	6.34375	28.1749	0.03125	0.4	0.135135	21.7	1.4	0	1	0
siCAV1	7.7	siCAV1_Area_039	5.1875	23.0396	-1.15625	0.3	0.12987	21.7	1.4	0	1	0
siCAV1	8.1	siCAV1_Area_039	4.23438	18.8064	-0.953125	0.4	0.123457	21.7	1.4	0	1	0
siCAV1	8.4	siCAV1_Area_039	3.0625	13.6017	-1.17188	0.3	0.119048	21.7	1.4	0	1	0
siCAV1	8.8	siCAV1_Area_039	2.40625	10.687	-0.65625	0.4	0.113636	21.7	1.4	0	1	0
siCAV1	9.1	siCAV1_Area_039	2.21875	9.85427	-0.1875	0.3	0.10989	21.7	1.4	0	1	0
siCAV1	9.5	siCAV1_Area_039	1.64062	7.28661	-0.578125	0.4	0.105263	21.7	1.4	0	1	0
siCAV1	9.8	siCAV1_Area_039	1.54688	6.87023	-0.09375	0.3	0.102041	21.7	1.4	0	1	0
siCAV1	21.7	siCAV1_Area_039	0	0	-1.54688	11.9	0.0460829	21.7	1.4	0	1	0
siCAV1	0.4	siCAV1_Area_040	0	0			2.5	22.8	1.1	0	1	0
siCAV1	0.7	siCAV1_Area_040	64.7031	92.9935	64.7031	0.3	1.42857	22.8	1.1	0	1	0
siCAV1	1.1	siCAV1_Area_040	69.5781	100	4.875	0.4	0.909091	22.8	1.1	0	1	0
siCAV1	1.4	siCAV1_Area_040	67.125	96.4743	-2.45312	0.3	0.714286	22.8	1.1	0	1	0
siCAV1	1.8	siCAV1_Area_040	63.9688	91.938	-3.15625	0.4	0.555556	22.8	1.1	0	1	0
siCAV1	2.1	siCAV1_Area_040	60.9531	87.6039	-3.01562	0.3	0.47619	22.8	1.1	0	1	0
siCAV1	2.5	siCAV1_Area_040	58.7969	84.5048	-2.15625	0.4	0.4	22.8	1.1	0	1	0
siCAV1	2.8	siCAV1_Area_040	53.8906	77.4534	-4.90625	0.3	0.357143	22.8	1.1	0	1	0
siCAV1	3.2	siCAV1_Area_040	50.4375	72.4905	-3.45312	0.4	0.3125	22.8	1.1	0	1	0
siCAV1	3.5	siCAV1_Area_040	46.9688	67.5051	-3.46875	0.3	0.285714	22.8	1.1	0	1	0
siCAV1	3.9	siCAV1_Area_040	46.5	66.8313	-0.46875	0.4	0.25641	22.8	1.1	0	1	0
siCAV1	4.2	siCAV1_Area_040	48.0156	69.0097	1.51562	0.3	0.238095	22.8	1.1	0	1	0
siCAV1	4.6	siCAV1_Area_040	47.1094	67.7072	-0.90625	0.4	0.217391	22.8	1.1	0	1	0
siCAV1	4.9	siCAV1_Area_040	46.2969	66.5394	-0.8125	0.3	0.204082	22.8	1.1	0	1	0
siCAV1	5.3	siCAV1_Area_040	44.75	64.3162	-1.54688	0.4	0.188679	22.8	1.1	0	1	0
siCAV1	5.6	siCAV1_Area_040	42.5312	61.1273	-2.21875	0.3	0.178571	22.8	1.1	0	1	0
siCAV1	6	siCAV1_Area_040	40.25	57.8486	-2.28125	0.4	0.166667	22.8	1.1	0	1	0
siCAV1	6.3	siCAV1_Area_040	37.3906	53.7391	-2.85938	0.3	0.15873	22.8	1.1	0	1	0
siCAV1	6.7	siCAV1_Area_040	33.0312	47.4736	-4.35938	0.4	0.149254	22.8	1.1	0	1	0
siCAV1	7	siCAV1_Area_040	31.25	44.9135	-1.78125	0.3	0.142857	22.8	1.1	0	1	0
siCAV1	7.4	siCAV1_Area_040	30.9219	44.4419	-0.328125	0.4	0.135135	22.8	1.1	0	1	0
siCAV1	7.7	siCAV1_Area_040	29.9062	42.9823	-1.01562	0.3	0.12987	22.8	1.1	0	1	0
siCAV1	8.1	siCAV1_Area_040	28.9375	41.5899	-0.96875	0.4	0.123457	22.8	1.1	0	1	0
siCAV1	8.4	siCAV1_Area_040	27.2344	39.1422	-1.70312	0.3	0.119048	22.8	1.1	0	1	0
siCAV1	8.8	siCAV1_Area_040	25.1094	36.088	-2.125	0.4	0.113636	22.8	1.1	0	1	0
siCAV1	9.1	siCAV1_Area_040	22.5	32.3377	-2.60938	0.3	0.10989	22.8	1.1	0	1	0
siCAV1	9.5	siCAV1_Area_040	19.6875	28.2955	-2.8125	0.4	0.105263	22.8	1.1	0	1	0
siCAV1	9.8	siCAV1_Area_040	17.7344	25.4884	-1.95312	0.3	0.102041	22.8	1.1	0	1	0
siCAV1	10.2	siCAV1_Area_040	15.7188	22.5915	-2.01562	0.4	0.0980392	22.8	1.1	0	1	0
siCAV1	10.5	siCAV1_Area_040	14.7812	21.2441	-0.9375	0.3	0.0952381	22.8	1.1	0	1	0
siCAV1	10.9	siCAV1_Area_040	13.75	19.762	-1.03125	0.4	0.0917431	22.8	1.1	0	1	0
siCAV1	11.2	siCAV1_Area_040	12.375	17.7858	-1.375	0.3	0.0892857	22.8	1.1	0	1	0
siCAV1	11.6	siCAV1_Area_040	11.3281	16.2812	-1.04688	0.4	0.0862069	22.8	1.1	0	1	0
siCAV1	11.9	siCAV1_Area_040	9.3125	13.3842	-2.01562	0.3	0.0840336	22.8	1.1	0	1	0
siCAV1	12.3	siCAV1_Area_040	7.45312	10.7119	-1.85938	0.4	0.0813008	22.8	1.1	0	1	0
siCAV1	12.6	siCAV1_Area_040	7.03125	10.1055	-0.421875	0.3	0.0793651	22.8	1.1	0	1	0
siCAV1	13	siCAV1_Area_040	6.78125	9.74624	-0.25	0.4	0.0769231	22.8	1.1	0	1	0
siCAV1	13.3	siCAV1_Area_040	5.98438	8.60094	-0.796875	0.3	0.075188	22.8	1.1	0	1	0
siCAV1	13.7	siCAV1_Area_040	4.70312	6.75949	-1.28125	0.4	0.0729927	22.8	1.1	0	1	0
siCAV1	14	siCAV1_Area_040	5.40625	7.77004	0.703125	0.3	0.0714286	22.8	1.1	0	1	0
siCAV1	14.4	siCAV1_Area_040	5.67188	8.15181	0.265625	0.4	0.0694444	22.8	1.1	0	1	0
siCAV1	14.7	siCAV1_Area_040	4.82812	6.93914	-0.84375	0.3	0.0680272	22.8	1.1	0	1	0
siCAV1	15.1	siCAV1_Area_040	4.04688	5.8163	-0.78125	0.4	0.0662252	22.8	1.1	0	1	0
siCAV1	15.4	siCAV1_Area_040	3.82812	5.50191	-0.21875	0.3	0.0649351	22.8	1.1	0	1	0
siCAV1	15.8	siCAV1_Area_040	3.125	4.49135	-0.703125	0.4	0.0632911	22.8	1.1	0	1	0
siCAV1	16.1	siCAV1_Area_040	2.96875	4.26679	-0.15625	0.3	0.0621118	22.8	1.1	0	1	0
siCAV1	16.5	siCAV1_Area_040	2.8125	4.04222	-0.15625	0.4	0.0606061	22.8	1.1	0	1	0
siCAV1	16.8	siCAV1_Area_040	2.48438	3.57063	-0.328125	0.3	0.0595238	22.8	1.1	0	1	0
siCAV1	17.2	siCAV1_Area_040	2.45312	3.52571	-0.03125	0.4	0.0581395	22.8	1.1	0	1	0
siCAV1	17.5	siCAV1_Area_040	2.34375	3.36852	-0.109375	0.3	0.0571429	22.8	1.1	0	1	0
siCAV1	17.9	siCAV1_Area_040	2.54688	3.66045	0.203125	0.4	0.0558659	22.8	1.1	0	1	0
siCAV1	18.2	siCAV1_Area_040	2.48438	3.57063	-0.0625	0.3	0.0549451	22.8	1.1	0	1	0
siCAV1	18.6	siCAV1_Area_040	1.76562	2.53762	-0.71875	0.4	0.0537634	22.8	1.1	0	1	0
siCAV1	18.9	siCAV1_Area_040	1.45312	2.08848	-0.3125	0.3	0.0529101	22.8	1.1	0	1	0
siCAV1	19.3	siCAV1_Area_040	1.53125	2.20076	0.078125	0.4	0.0518135	22.8	1.1	0	1	0
siCAV1	19.6	siCAV1_Area_040	1.25	1.79654	-0.28125	0.3	0.0510204	22.8	1.1	0	1	0
siCAV1	20	siCAV1_Area_040	1.1875	1.70671	-0.0625	0.4	0.05	22.8	1.1	0	1	0
siCAV1	20.3	siCAV1_Area_040	0.96875	1.39232	-0.21875	0.3	0.0492611	22.8	1.1	0	1	0
siCAV1	22.8	siCAV1_Area_040	0	0	-0.96875	2.5	0.0438596	22.8	1.1	0	1	0
siCAV1	0.4	siCAV1_Area_041	0	0			2.5	8.4	1.8	0	1	0
siCAV1	0.7	siCAV1_Area_041	182.547	61.9919	182.547	0.3	1.42857	8.4	1.8	0	1	0
siCAV1	1.1	siCAV1_Area_041	271.828	92.3114	89.2812	0.4	0.909091	8.4	1.8	0	1	0
siCAV1	1.4	siCAV1_Area_041	288.25	97.8881	16.4219	0.3	0.714286	8.4	1.8	0	1	0
siCAV1	1.8	siCAV1_Area_041	294.469	100	6.21875	0.4	0.555556	8.4	1.8	0	1	0
siCAV1	2.1	siCAV1_Area_041	282.344	95.8824	-12.125	0.3	0.47619	8.4	1.8	0	1	0
siCAV1	2.5	siCAV1_Area_041	276.328	93.8395	-6.01562	0.4	0.4	8.4	1.8	0	1	0
siCAV1	2.8	siCAV1_Area_041	257.844	87.5623	-18.4844	0.3	0.357143	8.4	1.8	0	1	0
siCAV1	3.2	siCAV1_Area_041	241.609	82.0492	-16.2344	0.4	0.3125	8.4	1.8	0	1	0
siCAV1	3.5	siCAV1_Area_041	226.188	76.8121	-15.4219	0.3	0.285714	8.4	1.8	0	1	0
siCAV1	3.9	siCAV1_Area_041	221.656	75.2733	-4.53125	0.4	0.25641	8.4	1.8	0	1	0
siCAV1	4.2	siCAV1_Area_041	202.328	68.7095	-19.3281	0.3	0.238095	8.4	1.8	0	1	0
siCAV1	4.6	siCAV1_Area_041	194.156	65.9344	-8.17188	0.4	0.217391	8.4	1.8	0	1	0
siCAV1	4.9	siCAV1_Area_041	177.906	60.416	-16.25	0.3	0.204082	8.4	1.8	0	1	0
siCAV1	5.3	siCAV1_Area_041	166.844	56.6592	-11.0625	0.4	0.188679	8.4	1.8	0	1	0
siCAV1	5.6	siCAV1_Area_041	147.078	49.9469	-19.7656	0.3	0.178571	8.4	1.8	0	1	0
siCAV1	6	siCAV1_Area_041	117.562	39.9236	-29.5156	0.4	0.166667	8.4	1.8	0	1	0
siCAV1	6.3	siCAV1_Area_041	100.016	33.9648	-17.5469	0.3	0.15873	8.4	1.8	0	1	0
siCAV1	6.7	siCAV1_Area_041	81.6094	27.7141	-18.4062	0.4	0.149254	8.4	1.8	0	1	0
siCAV1	7	siCAV1_Area_041	46.5469	15.8071	-35.0625	0.3	0.142857	8.4	1.8	0	1	0
siCAV1	7.4	siCAV1_Area_041	25.4375	8.63844	-21.1094	0.4	0.135135	8.4	1.8	0	1	0
siCAV1	7.7	siCAV1_Area_041	15.5625	5.28494	-9.875	0.3	0.12987	8.4	1.8	0	1	0
siCAV1	8.4	siCAV1_Area_041	0	0	-15.5625	0.7	0.119048	8.4	1.8	0	1	0
siCAV1	0.4	siCAV1_Area_042	0	0			2.5	5.6	1.8	0	1	0
siCAV1	0.7	siCAV1_Area_042	6.54688	85.336	6.54688	0.3	1.42857	5.6	1.8	0	1	0
siCAV1	1.1	siCAV1_Area_042	6.73438	87.78	0.1875	0.4	0.909091	5.6	1.8	0	1	0
siCAV1	1.4	siCAV1_Area_042	6.64062	86.558	-0.09375	0.3	0.714286	5.6	1.8	0	1	0
siCAV1	1.8	siCAV1_Area_042	7.67188	100	1.03125	0.4	0.555556	5.6	1.8	0	1	0
siCAV1	2.1	siCAV1_Area_042	7.46875	97.3523	-0.203125	0.3	0.47619	5.6	1.8	0	1	0
siCAV1	2.5	siCAV1_Area_042	7.48438	97.556	0.015625	0.4	0.4	5.6	1.8	0	1	0
siCAV1	2.8	siCAV1_Area_042	6.28125	81.8737	-1.20312	0.3	0.357143	5.6	1.8	0	1	0
siCAV1	3.2	siCAV1_Area_042	4.20312	54.7862	-2.07812	0.4	0.3125	5.6	1.8	0	1	0
siCAV1	3.5	siCAV1_Area_042	3.79688	49.4908	-0.40625	0.3	0.285714	5.6	1.8	0	1	0
siCAV1	3.9	siCAV1_Area_042	2.21875	28.9206	-1.57812	0.4	0.25641	5.6	1.8	0	1	0
siCAV1	5.6	siCAV1_Area_042	0	0	-2.21875	1.7	0.178571	5.6	1.8	0	1	0
siCAV1	0.4	siCAV1_Area_043	0	0			2.5	5.6	0.7	0	1	0
siCAV1	0.7	siCAV1_Area_043	17.0469	100	17.0469	0.3	1.42857	5.6	0.7	0	1	0
siCAV1	1.1	siCAV1_Area_043	15.3594	90.1008	-1.6875	0.4	0.909091	5.6	0.7	0	1	0
siCAV1	1.4	siCAV1_Area_043	14.2031	83.3181	-1.15625	0.3	0.714286	5.6	0.7	0	1	0
siCAV1	1.8	siCAV1_Area_043	11.6719	68.4693	-2.53125	0.4	0.555556	5.6	0.7	0	1	0
siCAV1	2.1	siCAV1_Area_043	10.7656	63.1531	-0.90625	0.3	0.47619	5.6	0.7	0	1	0
siCAV1	2.5	siCAV1_Area_043	10.7188	62.8781	-0.046875	0.4	0.4	5.6	0.7	0	1	0
siCAV1	2.8	siCAV1_Area_043	11.0781	64.9863	0.359375	0.3	0.357143	5.6	0.7	0	1	0
siCAV1	3.2	siCAV1_Area_043	9.96875	58.4785	-1.10938	0.4	0.3125	5.6	0.7	0	1	0
siCAV1	3.5	siCAV1_Area_043	8.71875	51.1457	-1.25	0.3	0.285714	5.6	0.7	0	1	0
siCAV1	3.9	siCAV1_Area_043	7.46875	43.813	-1.25	0.4	0.25641	5.6	0.7	0	1	0
siCAV1	4.2	siCAV1_Area_043	5.8125	34.0972	-1.65625	0.3	0.238095	5.6	0.7	0	1	0
siCAV1	4.6	siCAV1_Area_043	4.04688	23.7397	-1.76562	0.4	0.217391	5.6	0.7	0	1	0
siCAV1	5.6	siCAV1_Area_043	0	0	-4.04688	1	0.178571	5.6	0.7	0	1	0
siCAV1	0.4	siCAV1_Area_044	0	0			2.5	15.8	2.1	0	1	0
siCAV1	0.7	siCAV1_Area_044	99.8125	90.8548	99.8125	0.3	1.42857	15.8	2.1	0	1	0
siCAV1	1.1	siCAV1_Area_044	108.594	98.848	8.78125	0.4	0.909091	15.8	2.1	0	1	0
siCAV1	1.4	siCAV1_Area_044	109.406	99.5875	0.8125	0.3	0.714286	15.8	2.1	0	1	0
siCAV1	1.8	siCAV1_Area_044	108.547	98.8053	-0.859375	0.4	0.555556	15.8	2.1	0	1	0
siCAV1	2.1	siCAV1_Area_044	109.859	100	1.3125	0.3	0.47619	15.8	2.1	0	1	0
siCAV1	2.5	siCAV1_Area_044	107.938	98.2506	-1.92188	0.4	0.4	15.8	2.1	0	1	0
siCAV1	2.8	siCAV1_Area_044	106.953	97.3546	-0.984375	0.3	0.357143	15.8	2.1	0	1	0
siCAV1	3.2	siCAV1_Area_044	102.266	93.0878	-4.6875	0.4	0.3125	15.8	2.1	0	1	0
siCAV1	3.5	siCAV1_Area_044	100.938	91.8788	-1.32812	0.3	0.285714	15.8	2.1	0	1	0
siCAV1	3.9	siCAV1_Area_044	97.4375	88.6929	-3.5	0.4	0.25641	15.8	2.1	0	1	0
siCAV1	4.2	siCAV1_Area_044	90.8281	82.6767	-6.60938	0.3	0.238095	15.8	2.1	0	1	0
siCAV1	4.6	siCAV1_Area_044	83.4531	75.9636	-7.375	0.4	0.217391	15.8	2.1	0	1	0
siCAV1	4.9	siCAV1_Area_044	72.1094	65.6379	-11.3438	0.3	0.204082	15.8	2.1	0	1	0
siCAV1	5.3	siCAV1_Area_044	68.5156	62.3667	-3.59375	0.4	0.188679	15.8	2.1	0	1	0
siCAV1	5.6	siCAV1_Area_044	67.5625	61.4991	-0.953125	0.3	0.178571	15.8	2.1	0	1	0
siCAV1	6	siCAV1_Area_044	65.3125	59.451	-2.25	0.4	0.166667	15.8	2.1	0	1	0
siCAV1	6.3	siCAV1_Area_044	59.8125	54.4446	-5.5	0.3	0.15873	15.8	2.1	0	1	0
siCAV1	6.7	siCAV1_Area_044	56.9062	51.7992	-2.90625	0.4	0.149254	15.8	2.1	0	1	0
siCAV1	7	siCAV1_Area_044	51.4844	46.8639	-5.42188	0.3	0.142857	15.8	2.1	0	1	0
siCAV1	7.4	siCAV1_Area_044	44.9531	40.9188	-6.53125	0.4	0.135135	15.8	2.1	0	1	0
siCAV1	7.7	siCAV1_Area_044	42.1094	38.3303	-2.84375	0.3	0.12987	15.8	2.1	0	1	0
siCAV1	8.1	siCAV1_Area_044	37.625	34.2483	-4.48438	0.4	0.123457	15.8	2.1	0	1	0
siCAV1	8.4	siCAV1_Area_044	33.9219	30.8775	-3.70312	0.3	0.119048	15.8	2.1	0	1	0
siCAV1	8.8	siCAV1_Area_044	33.0312	30.0668	-0.890625	0.4	0.113636	15.8	2.1	0	1	0
siCAV1	9.1	siCAV1_Area_044	28.8594	26.2694	-4.17188	0.3	0.10989	15.8	2.1	0	1	0
siCAV1	9.5	siCAV1_Area_044	25	22.7564	-3.85938	0.4	0.105263	15.8	2.1	0	1	0
siCAV1	9.8	siCAV1_Area_044	21.0156	19.1296	-3.98438	0.3	0.102041	15.8	2.1	0	1	0
siCAV1	10.2	siCAV1_Area_044	18.7812	17.0957	-2.23438	0.4	0.0980392	15.8	2.1	0	1	0
siCAV1	10.5	siCAV1_Area_044	16.4688	14.9908	-2.3125	0.3	0.0952381	15.8	2.1	0	1	0
siCAV1	10.9	siCAV1_Area_044	15.1875	13.8245	-1.28125	0.4	0.0917431	15.8	2.1	0	1	0
siCAV1	11.2	siCAV1_Area_044	11.5625	10.5248	-3.625	0.3	0.0892857	15.8	2.1	0	1	0
siCAV1	11.6	siCAV1_Area_044	9.3125	8.47675	-2.25	0.4	0.0862069	15.8	2.1	0	1	0
siCAV1	11.9	siCAV1_Area_044	7.6875	6.99758	-1.625	0.3	0.0840336	15.8	2.1	0	1	0
siCAV1	12.3	siCAV1_Area_044	6.26562	5.70331	-1.42188	0.4	0.0813008	15.8	2.1	0	1	0
siCAV1	12.6	siCAV1_Area_044	4.01562	3.65524	-2.25	0.3	0.0793651	15.8	2.1	0	1	0
siCAV1	15.8	siCAV1_Area_044	0	0	-4.01562	3.2	0.0632911	15.8	2.1	0	1	0
siCAV1	0.4	siCAV1_Area_045	0	0			2.5	12.6	0.7	0	1	0
siCAV1	0.7	siCAV1_Area_045	14.2344	100	14.2344	0.3	1.42857	12.6	0.7	0	1	0
siCAV1	1.1	siCAV1_Area_045	12.8594	90.3403	-1.375	0.4	0.909091	12.6	0.7	0	1	0
siCAV1	1.4	siCAV1_Area_045	13.1875	92.6454	0.328125	0.3	0.714286	12.6	0.7	0	1	0
siCAV1	1.8	siCAV1_Area_045	13.0781	91.8771	-0.109375	0.4	0.555556	12.6	0.7	0	1	0
siCAV1	2.1	siCAV1_Area_045	12.9531	90.9989	-0.125	0.3	0.47619	12.6	0.7	0	1	0
siCAV1	2.5	siCAV1_Area_045	12.4688	87.596	-0.484375	0.4	0.4	12.6	0.7	0	1	0
siCAV1	2.8	siCAV1_Area_045	12.2031	85.73	-0.265625	0.3	0.357143	12.6	0.7	0	1	0
siCAV1	3.2	siCAV1_Area_045	11.8594	83.315	-0.34375	0.4	0.3125	12.6	0.7	0	1	0
siCAV1	3.5	siCAV1_Area_045	11.7969	82.876	-0.0625	0.3	0.285714	12.6	0.7	0	1	0
siCAV1	3.9	siCAV1_Area_045	10.8906	76.5093	-0.90625	0.4	0.25641	12.6	0.7	0	1	0
siCAV1	4.2	siCAV1_Area_045	9.09375	63.8858	-1.79688	0.3	0.238095	12.6	0.7	0	1	0
siCAV1	4.6	siCAV1_Area_045	7.01562	49.2865	-2.07812	0.4	0.217391	12.6	0.7	0	1	0
siCAV1	4.9	siCAV1_Area_045	6.34375	44.5664	-0.671875	0.3	0.204082	12.6	0.7	0	1	0
siCAV1	5.3	siCAV1_Area_045	5.6875	39.9561	-0.65625	0.4	0.188679	12.6	0.7	0	1	0
siCAV1	5.6	siCAV1_Area_045	5.21875	36.663	-0.46875	0.3	0.178571	12.6	0.7	0	1	0
siCAV1	6	siCAV1_Area_045	4.9375	34.6872	-0.28125	0.4	0.166667	12.6	0.7	0	1	0
siCAV1	6.3	siCAV1_Area_045	4.3125	30.2964	-0.625	0.3	0.15873	12.6	0.7	0	1	0
siCAV1	6.7	siCAV1_Area_045	3.65625	25.6861	-0.65625	0.4	0.149254	12.6	0.7	0	1	0
siCAV1	7	siCAV1_Area_045	3.1875	22.393	-0.46875	0.3	0.142857	12.6	0.7	0	1	0
siCAV1	7.4	siCAV1_Area_045	2.95312	20.7464	-0.234375	0.4	0.135135	12.6	0.7	0	1	0
siCAV1	7.7	siCAV1_Area_045	2.84375	19.978	-0.109375	0.3	0.12987	12.6	0.7	0	1	0
siCAV1	8.1	siCAV1_Area_045	2.59375	18.2217	-0.25	0.4	0.123457	12.6	0.7	0	1	0
siCAV1	8.4	siCAV1_Area_045	2.45312	17.2338	-0.140625	0.3	0.119048	12.6	0.7	0	1	0
siCAV1	8.8	siCAV1_Area_045	2.32812	16.3557	-0.125	0.4	0.113636	12.6	0.7	0	1	0
siCAV1	9.1	siCAV1_Area_045	2.14062	15.0384	-0.1875	0.3	0.10989	12.6	0.7	0	1	0
siCAV1	9.5	siCAV1_Area_045	1.95312	13.7212	-0.1875	0.4	0.105263	12.6	0.7	0	1	0
siCAV1	9.8	siCAV1_Area_045	1.67188	11.7453	-0.28125	0.3	0.102041	12.6	0.7	0	1	0
siCAV1	10.2	siCAV1_Area_045	1.35938	9.54995	-0.3125	0.4	0.0980392	12.6	0.7	0	1	0
siCAV1	10.5	siCAV1_Area_045	1.1875	8.34248	-0.171875	0.3	0.0952381	12.6	0.7	0	1	0
siCAV1	10.9	siCAV1_Area_045	1.42188	9.98902	0.234375	0.4	0.0917431	12.6	0.7	0	1	0
siCAV1	12.6	siCAV1_Area_045	0	0	-1.42188	1.7	0.0793651	12.6	0.7	0	1	0
siCAV1	0.4	siCAV1_Area_046	0	0			2.5	6.3	3.2	0	1	0
siCAV1	0.7	siCAV1_Area_046	2.28125	58.871	2.28125	0.3	1.42857	6.3	3.2	0	1	0
siCAV1	1.1	siCAV1_Area_046	2.3125	59.6774	0.03125	0.4	0.909091	6.3	3.2	0	1	0
siCAV1	1.4	siCAV1_Area_046	2.6875	69.3548	0.375	0.3	0.714286	6.3	3.2	0	1	0
siCAV1	1.8	siCAV1_Area_046	2.92188	75.4032	0.234375	0.4	0.555556	6.3	3.2	0	1	0
siCAV1	2.1	siCAV1_Area_046	3.15625	81.4516	0.234375	0.3	0.47619	6.3	3.2	0	1	0
siCAV1	2.5	siCAV1_Area_046	3.28125	84.6774	0.125	0.4	0.4	6.3	3.2	0	1	0
siCAV1	2.8	siCAV1_Area_046	3.65625	94.3548	0.375	0.3	0.357143	6.3	3.2	0	1	0
siCAV1	3.2	siCAV1_Area_046	3.875	100	0.21875	0.4	0.3125	6.3	3.2	0	1	0
siCAV1	3.5	siCAV1_Area_046	3.82812	98.7903	-0.046875	0.3	0.285714	6.3	3.2	0	1	0
siCAV1	3.9	siCAV1_Area_046	3.125	80.6452	-0.703125	0.4	0.25641	6.3	3.2	0	1	0
siCAV1	4.2	siCAV1_Area_046	2.54688	65.7258	-0.578125	0.3	0.238095	6.3	3.2	0	1	0
siCAV1	4.6	siCAV1_Area_046	2.20312	56.8548	-0.34375	0.4	0.217391	6.3	3.2	0	1	0
siCAV1	4.9	siCAV1_Area_046	2.26562	58.4677	0.0625	0.3	0.204082	6.3	3.2	0	1	0
siCAV1	5.3	siCAV1_Area_046	2.07812	53.629	-0.1875	0.4	0.188679	6.3	3.2	0	1	0
siCAV1	5.6	siCAV1_Area_046	1.45312	37.5	-0.625	0.3	0.178571	6.3	3.2	0	1	0
siCAV1	6	siCAV1_Area_046	1.01562	26.2097	-0.4375	0.4	0.166667	6.3	3.2	0	1	0
siCAV1	6.3	siCAV1_Area_046	0	0	-1.01562	0.3	0.15873	6.3	3.2	0	1	0
siCAV1	0.4	siCAV1_Area_047	0	0			2.5	11.6	1.1	0	1	0
siCAV1	1.1	siCAV1_Area_047	13.875	100	13.875	0.7	0.909091	11.6	1.1	0	1	0
siCAV1	1.4	siCAV1_Area_047	12.4062	89.4144	-1.46875	0.3	0.714286	11.6	1.1	0	1	0
siCAV1	1.8	siCAV1_Area_047	11.4531	82.545	-0.953125	0.4	0.555556	11.6	1.1	0	1	0
siCAV1	2.1	siCAV1_Area_047	11.7344	84.5721	0.28125	0.3	0.47619	11.6	1.1	0	1	0
siCAV1	2.5	siCAV1_Area_047	9.9375	71.6216	-1.79688	0.4	0.4	11.6	1.1	0	1	0
siCAV1	2.8	siCAV1_Area_047	8.0625	58.1081	-1.875	0.3	0.357143	11.6	1.1	0	1	0
siCAV1	3.2	siCAV1_Area_047	5.9375	42.7928	-2.125	0.4	0.3125	11.6	1.1	0	1	0
siCAV1	3.5	siCAV1_Area_047	5.28125	38.0631	-0.65625	0.3	0.285714	11.6	1.1	0	1	0
siCAV1	3.9	siCAV1_Area_047	3.71875	26.8018	-1.5625	0.4	0.25641	11.6	1.1	0	1	0
siCAV1	11.6	siCAV1_Area_047	0	0	-3.71875	7.7	0.0862069	11.6	1.1	0	1	0
siCAV1	0.4	siCAV1_Area_048	0	0			2.5	11.6	1.4	0	1	0
siCAV1	0.7	siCAV1_Area_048	14.75	95.0655	14.75	0.3	1.42857	11.6	1.4	0	1	0
siCAV1	1.1	siCAV1_Area_048	14.6406	94.3605	-0.109375	0.4	0.909091	11.6	1.4	0	1	0
siCAV1	1.4	siCAV1_Area_048	15.5156	100	0.875	0.3	0.714286	11.6	1.4	0	1	0
siCAV1	1.8	siCAV1_Area_048	14.5312	93.6556	-0.984375	0.4	0.555556	11.6	1.4	0	1	0
siCAV1	2.1	siCAV1_Area_048	12.6875	81.7724	-1.84375	0.3	0.47619	11.6	1.4	0	1	0
siCAV1	2.5	siCAV1_Area_048	11.7344	75.6294	-0.953125	0.4	0.4	11.6	1.4	0	1	0
siCAV1	2.8	siCAV1_Area_048	11.2031	72.2054	-0.53125	0.3	0.357143	11.6	1.4	0	1	0
siCAV1	3.2	siCAV1_Area_048	10.9062	70.292	-0.296875	0.4	0.3125	11.6	1.4	0	1	0
siCAV1	3.5	siCAV1_Area_048	9.78125	63.0413	-1.125	0.3	0.285714	11.6	1.4	0	1	0
siCAV1	3.9	siCAV1_Area_048	7.26562	46.8278	-2.51562	0.4	0.25641	11.6	1.4	0	1	0
siCAV1	4.2	siCAV1_Area_048	5.76562	37.1601	-1.5	0.3	0.238095	11.6	1.4	0	1	0
siCAV1	4.6	siCAV1_Area_048	6.5	41.8933	0.734375	0.4	0.217391	11.6	1.4	0	1	0
siCAV1	4.9	siCAV1_Area_048	5.8125	37.4622	-0.6875	0.3	0.204082	11.6	1.4	0	1	0
siCAV1	5.3	siCAV1_Area_048	4.48438	28.9023	-1.32812	0.4	0.188679	11.6	1.4	0	1	0
siCAV1	5.6	siCAV1_Area_048	3.5	22.5579	-0.984375	0.3	0.178571	11.6	1.4	0	1	0
siCAV1	6	siCAV1_Area_048	3.01562	19.4361	-0.484375	0.4	0.166667	11.6	1.4	0	1	0
siCAV1	6.3	siCAV1_Area_048	2.78125	17.9255	-0.234375	0.3	0.15873	11.6	1.4	0	1	0
siCAV1	6.7	siCAV1_Area_048	2.8125	18.1269	0.03125	0.4	0.149254	11.6	1.4	0	1	0
siCAV1	7	siCAV1_Area_048	3	19.3353	0.1875	0.3	0.142857	11.6	1.4	0	1	0
siCAV1	7.4	siCAV1_Area_048	2.89062	18.6304	-0.109375	0.4	0.135135	11.6	1.4	0	1	0
siCAV1	7.7	siCAV1_Area_048	3.04688	19.6375	0.15625	0.3	0.12987	11.6	1.4	0	1	0
siCAV1	8.1	siCAV1_Area_048	2.875	18.5297	-0.171875	0.4	0.123457	11.6	1.4	0	1	0
siCAV1	8.4	siCAV1_Area_048	2.6875	17.3212	-0.1875	0.3	0.119048	11.6	1.4	0	1	0
siCAV1	8.8	siCAV1_Area_048	2.42188	15.6093	-0.265625	0.4	0.113636	11.6	1.4	0	1	0
siCAV1	9.1	siCAV1_Area_048	1.42188	9.16415	-1	0.3	0.10989	11.6	1.4	0	1	0
siCAV1	9.5	siCAV1_Area_048	1.5	9.66767	0.078125	0.4	0.105263	11.6	1.4	0	1	0
siCAV1	9.8	siCAV1_Area_048	0.90625	5.84089	-0.59375	0.3	0.102041	11.6	1.4	0	1	0
siCAV1	10.2	siCAV1_Area_048	0.71875	4.63243	-0.1875	0.4	0.0980392	11.6	1.4	0	1	0
siCAV1	10.5	siCAV1_Area_048	0.71875	4.63243	0	0.3	0.0952381	11.6	1.4	0	1	0
siCAV1	10.9	siCAV1_Area_048	0.671875	4.33031	-0.046875	0.4	0.0917431	11.6	1.4	0	1	0
siCAV1	11.2	siCAV1_Area_048	0.515625	3.32326	-0.15625	0.3	0.0892857	11.6	1.4	0	1	0
siCAV1	11.6	siCAV1_Area_048	0	0	-0.515625	0.4	0.0862069	11.6	1.4	0	1	0
siCAV1	0.4	siCAV1_Area_049	0	0			2.5	11.6	0.7	0	1	0
siCAV1	0.7	siCAV1_Area_049	15.7031	100	15.7031	0.3	1.42857	11.6	0.7	0	1	0
siCAV1	1.1	siCAV1_Area_049	15.4375	98.3085	-0.265625	0.4	0.909091	11.6	0.7	0	1	0
siCAV1	1.4	siCAV1_Area_049	14.0156	89.2537	-1.42188	0.3	0.714286	11.6	0.7	0	1	0
siCAV1	1.8	siCAV1_Area_049	13.4844	85.8706	-0.53125	0.4	0.555556	11.6	0.7	0	1	0
siCAV1	2.1	siCAV1_Area_049	14.6875	93.5323	1.20312	0.3	0.47619	11.6	0.7	0	1	0
siCAV1	2.5	siCAV1_Area_049	11.9531	76.1194	-2.73438	0.4	0.4	11.6	0.7	0	1	0
siCAV1	2.8	siCAV1_Area_049	8.54688	54.4279	-3.40625	0.3	0.357143	11.6	0.7	0	1	0
siCAV1	3.2	siCAV1_Area_049	8.51562	54.2289	-0.03125	0.4	0.3125	11.6	0.7	0	1	0
siCAV1	3.5	siCAV1_Area_049	8.64062	55.0249	0.125	0.3	0.285714	11.6	0.7	0	1	0
siCAV1	3.9	siCAV1_Area_049	8.14062	51.8408	-0.5	0.4	0.25641	11.6	0.7	0	1	0
siCAV1	4.2	siCAV1_Area_049	7.34375	46.7662	-0.796875	0.3	0.238095	11.6	0.7	0	1	0
siCAV1	4.6	siCAV1_Area_049	6.9375	44.1791	-0.40625	0.4	0.217391	11.6	0.7	0	1	0
siCAV1	4.9	siCAV1_Area_049	6.48438	41.2935	-0.453125	0.3	0.204082	11.6	0.7	0	1	0
siCAV1	5.3	siCAV1_Area_049	6.8125	43.3831	0.328125	0.4	0.188679	11.6	0.7	0	1	0
siCAV1	5.6	siCAV1_Area_049	6.45312	41.0945	-0.359375	0.3	0.178571	11.6	0.7	0	1	0
siCAV1	6	siCAV1_Area_049	6.5	41.393	0.046875	0.4	0.166667	11.6	0.7	0	1	0
siCAV1	6.3	siCAV1_Area_049	5.34375	34.0299	-1.15625	0.3	0.15873	11.6	0.7	0	1	0
siCAV1	6.7	siCAV1_Area_049	5.15625	32.8358	-0.1875	0.4	0.149254	11.6	0.7	0	1	0
siCAV1	7	siCAV1_Area_049	4.92188	31.3433	-0.234375	0.3	0.142857	11.6	0.7	0	1	0
siCAV1	7.4	siCAV1_Area_049	4.625	29.4527	-0.296875	0.4	0.135135	11.6	0.7	0	1	0
siCAV1	7.7	siCAV1_Area_049	4.15625	26.4677	-0.46875	0.3	0.12987	11.6	0.7	0	1	0
siCAV1	8.1	siCAV1_Area_049	3.64062	23.1841	-0.515625	0.4	0.123457	11.6	0.7	0	1	0
siCAV1	8.4	siCAV1_Area_049	3.25	20.6965	-0.390625	0.3	0.119048	11.6	0.7	0	1	0
siCAV1	8.8	siCAV1_Area_049	2.40625	15.3234	-0.84375	0.4	0.113636	11.6	0.7	0	1	0
siCAV1	9.1	siCAV1_Area_049	1.90625	12.1393	-0.5	0.3	0.10989	11.6	0.7	0	1	0
siCAV1	9.5	siCAV1_Area_049	1.51562	9.65174	-0.390625	0.4	0.105263	11.6	0.7	0	1	0
siCAV1	9.8	siCAV1_Area_049	1.29688	8.25871	-0.21875	0.3	0.102041	11.6	0.7	0	1	0
siCAV1	10.2	siCAV1_Area_049	1.45312	9.25373	0.15625	0.4	0.0980392	11.6	0.7	0	1	0
siCAV1	10.5	siCAV1_Area_049	0.828125	5.27363	-0.625	0.3	0.0952381	11.6	0.7	0	1	0
siCAV1	10.9	siCAV1_Area_049	0.65625	4.1791	-0.171875	0.4	0.0917431	11.6	0.7	0	1	0
siCAV1	11.6	siCAV1_Area_049	0	0	-0.65625	0.7	0.0862069	11.6	0.7	0	1	0
siCAV1	0.4	siCAV1_Area_050	0	0			2.5	7.7	1.1	0	1	0
siCAV1	1.1	siCAV1_Area_050	13.7188	100	13.7188	0.7	0.909091	7.7	1.1	0	1	0
siCAV1	1.4	siCAV1_Area_050	12.9219	94.1913	-0.796875	0.3	0.714286	7.7	1.1	0	1	0
siCAV1	1.8	siCAV1_Area_050	11.375	82.9157	-1.54688	0.4	0.555556	7.7	1.1	0	1	0
siCAV1	2.1	siCAV1_Area_050	9.8125	71.5262	-1.5625	0.3	0.47619	7.7	1.1	0	1	0
siCAV1	2.5	siCAV1_Area_050	7.9375	57.8588	-1.875	0.4	0.4	7.7	1.1	0	1	0
siCAV1	2.8	siCAV1_Area_050	7.01562	51.139	-0.921875	0.3	0.357143	7.7	1.1	0	1	0
siCAV1	3.2	siCAV1_Area_050	6.54688	47.7221	-0.46875	0.4	0.3125	7.7	1.1	0	1	0
siCAV1	3.5	siCAV1_Area_050	6.25	45.5581	-0.296875	0.3	0.285714	7.7	1.1	0	1	0
siCAV1	3.9	siCAV1_Area_050	4.75	34.6241	-1.5	0.4	0.25641	7.7	1.1	0	1	0
siCAV1	4.2	siCAV1_Area_050	4.70312	34.2825	-0.046875	0.3	0.238095	7.7	1.1	0	1	0
siCAV1	4.6	siCAV1_Area_050	3.5	25.5125	-1.20312	0.4	0.217391	7.7	1.1	0	1	0
siCAV1	4.9	siCAV1_Area_050	3.07812	22.4374	-0.421875	0.3	0.204082	7.7	1.1	0	1	0
siCAV1	5.3	siCAV1_Area_050	3.4375	25.0569	0.359375	0.4	0.188679	7.7	1.1	0	1	0
siCAV1	5.6	siCAV1_Area_050	3.21875	23.4624	-0.21875	0.3	0.178571	7.7	1.1	0	1	0
siCAV1	6	siCAV1_Area_050	3.17188	23.1207	-0.046875	0.4	0.166667	7.7	1.1	0	1	0
siCAV1	6.3	siCAV1_Area_050	2.40625	17.5399	-0.765625	0.3	0.15873	7.7	1.1	0	1	0
siCAV1	6.7	siCAV1_Area_050	2.40625	17.5399	0	0.4	0.149254	7.7	1.1	0	1	0
siCAV1	7	siCAV1_Area_050	2.10938	15.3759	-0.296875	0.3	0.142857	7.7	1.1	0	1	0
siCAV1	7.4	siCAV1_Area_050	1.25	9.11162	-0.859375	0.4	0.135135	7.7	1.1	0	1	0
siCAV1	7.7	siCAV1_Area_050	0	0	-1.25	0.3	0.12987	7.7	1.1	0	1	0
siCAV1	0.4	siCAV1_Area_051	0	0			2.5	3.9	2.5	0	1	0
siCAV1	2.5	siCAV1_Area_051	2.5625	100	2.5625	2.1	0.4	3.9	2.5	0	1	0
siCAV1	2.8	siCAV1_Area_051	1.45312	56.7073	-1.10938	0.3	0.357143	3.9	2.5	0	1	0
siCAV1	3.2	siCAV1_Area_051	1.28125	50	-0.171875	0.4	0.3125	3.9	2.5	0	1	0
siCAV1	3.9	siCAV1_Area_051	0	0	-1.28125	0.7	0.25641	3.9	2.5	0	1	0
siCAV1	0.4	siCAV1_Area_052	0	0			2.5	7.4	1.1	0	1	0
siCAV1	0.7	siCAV1_Area_052	50.9219	67.4881	50.9219	0.3	1.42857	7.4	1.1	0	1	0
siCAV1	1.1	siCAV1_Area_052	75.4531	100	24.5312	0.4	0.909091	7.4	1.1	0	1	0
siCAV1	1.4	siCAV1_Area_052	73.7656	97.7635	-1.6875	0.3	0.714286	7.4	1.1	0	1	0
siCAV1	1.8	siCAV1_Area_052	74.2969	98.4676	0.53125	0.4	0.555556	7.4	1.1	0	1	0
siCAV1	2.1	siCAV1_Area_052	73.3906	97.2665	-0.90625	0.3	0.47619	7.4	1.1	0	1	0
siCAV1	2.5	siCAV1_Area_052	74.4062	98.6125	1.01562	0.4	0.4	7.4	1.1	0	1	0
siCAV1	2.8	siCAV1_Area_052	70.7031	93.7047	-3.70312	0.3	0.357143	7.4	1.1	0	1	0
siCAV1	3.2	siCAV1_Area_052	69.1094	91.5925	-1.59375	0.4	0.3125	7.4	1.1	0	1	0
siCAV1	3.5	siCAV1_Area_052	64.8125	85.8977	-4.29688	0.3	0.285714	7.4	1.1	0	1	0
siCAV1	3.9	siCAV1_Area_052	62.375	82.6672	-2.4375	0.4	0.25641	7.4	1.1	0	1	0
siCAV1	4.2	siCAV1_Area_052	60.3438	79.9752	-2.03125	0.3	0.238095	7.4	1.1	0	1	0
siCAV1	4.6	siCAV1_Area_052	57.4531	76.1441	-2.89062	0.4	0.217391	7.4	1.1	0	1	0
siCAV1	4.9	siCAV1_Area_052	55.0156	72.9136	-2.4375	0.3	0.204082	7.4	1.1	0	1	0
siCAV1	5.3	siCAV1_Area_052	51.7656	68.6063	-3.25	0.4	0.188679	7.4	1.1	0	1	0
siCAV1	5.6	siCAV1_Area_052	44.3906	58.8321	-7.375	0.3	0.178571	7.4	1.1	0	1	0
siCAV1	6	siCAV1_Area_052	41.5781	55.1046	-2.8125	0.4	0.166667	7.4	1.1	0	1	0
siCAV1	6.3	siCAV1_Area_052	29.0312	38.4759	-12.5469	0.3	0.15873	7.4	1.1	0	1	0
siCAV1	6.7	siCAV1_Area_052	16.9219	22.427	-12.1094	0.4	0.149254	7.4	1.1	0	1	0
siCAV1	7	siCAV1_Area_052	5.85938	7.76558	-11.0625	0.3	0.142857	7.4	1.1	0	1	0
siCAV1	7.4	siCAV1_Area_052	0	0	-5.85938	0.4	0.135135	7.4	1.1	0	1	0
siCAV1	0.4	siCAV1_Area_053	0	0			2.5	8.4	1.1	0	1	0
siCAV1	1.1	siCAV1_Area_053	19.6406	100	19.6406	0.7	0.909091	8.4	1.1	0	1	0
siCAV1	1.4	siCAV1_Area_053	17.7969	90.6126	-1.84375	0.3	0.714286	8.4	1.1	0	1	0
siCAV1	1.8	siCAV1_Area_053	16.9375	86.2371	-0.859375	0.4	0.555556	8.4	1.1	0	1	0
siCAV1	2.1	siCAV1_Area_053	17.75	90.3739	0.8125	0.3	0.47619	8.4	1.1	0	1	0
siCAV1	2.5	siCAV1_Area_053	18.0469	91.8854	0.296875	0.4	0.4	8.4	1.1	0	1	0
siCAV1	2.8	siCAV1_Area_053	17.5469	89.3397	-0.5	0.3	0.357143	8.4	1.1	0	1	0
siCAV1	3.2	siCAV1_Area_053	15.625	79.5545	-1.92188	0.4	0.3125	8.4	1.1	0	1	0
siCAV1	3.5	siCAV1_Area_053	14.4375	73.5084	-1.1875	0.3	0.285714	8.4	1.1	0	1	0
siCAV1	3.9	siCAV1_Area_053	11.7969	60.0636	-2.64062	0.4	0.25641	8.4	1.1	0	1	0
siCAV1	4.2	siCAV1_Area_053	10.8438	55.2108	-0.953125	0.3	0.238095	8.4	1.1	0	1	0
siCAV1	4.6	siCAV1_Area_053	9.3125	47.4145	-1.53125	0.4	0.217391	8.4	1.1	0	1	0
siCAV1	4.9	siCAV1_Area_053	7.60938	38.743	-1.70312	0.3	0.204082	8.4	1.1	0	1	0
siCAV1	5.3	siCAV1_Area_053	6.45312	32.856	-1.15625	0.4	0.188679	8.4	1.1	0	1	0
siCAV1	5.6	siCAV1_Area_053	5.6875	28.9578	-0.765625	0.3	0.178571	8.4	1.1	0	1	0
siCAV1	6	siCAV1_Area_053	5.10938	26.0143	-0.578125	0.4	0.166667	8.4	1.1	0	1	0
siCAV1	6.3	siCAV1_Area_053	3.78125	19.2522	-1.32812	0.3	0.15873	8.4	1.1	0	1	0
siCAV1	6.7	siCAV1_Area_053	2.60938	13.2856	-1.17188	0.4	0.149254	8.4	1.1	0	1	0
siCAV1	7	siCAV1_Area_053	1.71875	8.75099	-0.890625	0.3	0.142857	8.4	1.1	0	1	0
siCAV1	8.4	siCAV1_Area_053	0	0	-1.71875	1.4	0.119048	8.4	1.1	0	1	0
siCAV1	0.4	siCAV1_Area_054	0	0			2.5	7.7	1.8	0	1	0
siCAV1	1.1	siCAV1_Area_054	281.891	92.7844	281.891	0.7	0.909091	7.7	1.8	0	1	0
siCAV1	1.4	siCAV1_Area_054	290.188	95.5153	8.29688	0.3	0.714286	7.7	1.8	0	1	0
siCAV1	1.8	siCAV1_Area_054	303.812	100	13.625	0.4	0.555556	7.7	1.8	0	1	0
siCAV1	2.1	siCAV1_Area_054	292.969	96.4308	-10.8438	0.3	0.47619	7.7	1.8	0	1	0
siCAV1	2.5	siCAV1_Area_054	283.766	93.4016	-9.20312	0.4	0.4	7.7	1.8	0	1	0
siCAV1	2.8	siCAV1_Area_054	258.172	84.9774	-25.5938	0.3	0.357143	7.7	1.8	0	1	0
siCAV1	3.2	siCAV1_Area_054	245.781	80.899	-12.3906	0.4	0.3125	7.7	1.8	0	1	0
siCAV1	3.5	siCAV1_Area_054	231.094	76.0646	-14.6875	0.3	0.285714	7.7	1.8	0	1	0
siCAV1	3.9	siCAV1_Area_054	221.312	72.8451	-9.78125	0.4	0.25641	7.7	1.8	0	1	0
siCAV1	4.2	siCAV1_Area_054	212.406	69.9136	-8.90625	0.3	0.238095	7.7	1.8	0	1	0
siCAV1	4.6	siCAV1_Area_054	170.453	56.1047	-41.9531	0.4	0.217391	7.7	1.8	0	1	0
siCAV1	4.9	siCAV1_Area_054	145.281	47.8194	-25.1719	0.3	0.204082	7.7	1.8	0	1	0
siCAV1	5.3	siCAV1_Area_054	115.906	38.1506	-29.375	0.4	0.188679	7.7	1.8	0	1	0
siCAV1	5.6	siCAV1_Area_054	76.7344	25.2571	-39.1719	0.3	0.178571	7.7	1.8	0	1	0
siCAV1	6	siCAV1_Area_054	41.2969	13.5929	-35.4375	0.4	0.166667	7.7	1.8	0	1	0
siCAV1	7.7	siCAV1_Area_054	0	0	-41.2969	1.7	0.12987	7.7	1.8	0	1	0
siCAV1	0.4	siCAV1_Area_055	0	0			2.5	9.8	1.1	0	1	0
siCAV1	0.7	siCAV1_Area_055	36.875	93.3544	36.875	0.3	1.42857	9.8	1.1	0	1	0
siCAV1	1.1	siCAV1_Area_055	39.5	100	2.625	0.4	0.909091	9.8	1.1	0	1	0
siCAV1	1.4	siCAV1_Area_055	35.0938	88.8449	-4.40625	0.3	0.714286	9.8	1.1	0	1	0
siCAV1	1.8	siCAV1_Area_055	30.1719	76.3845	-4.92188	0.4	0.555556	9.8	1.1	0	1	0
siCAV1	2.1	siCAV1_Area_055	25.2656	63.9636	-4.90625	0.3	0.47619	9.8	1.1	0	1	0
siCAV1	2.5	siCAV1_Area_055	19.5938	49.6044	-5.67188	0.4	0.4	9.8	1.1	0	1	0
siCAV1	2.8	siCAV1_Area_055	17.4375	44.1456	-2.15625	0.3	0.357143	9.8	1.1	0	1	0
siCAV1	3.2	siCAV1_Area_055	16.8438	42.6424	-0.59375	0.4	0.3125	9.8	1.1	0	1	0
siCAV1	3.5	siCAV1_Area_055	13.8906	35.1661	-2.95312	0.3	0.285714	9.8	1.1	0	1	0
siCAV1	3.9	siCAV1_Area_055	11.9844	30.3402	-1.90625	0.4	0.25641	9.8	1.1	0	1	0
siCAV1	4.2	siCAV1_Area_055	7.59375	19.2247	-4.39062	0.3	0.238095	9.8	1.1	0	1	0
siCAV1	4.6	siCAV1_Area_055	6.25	15.8228	-1.34375	0.4	0.217391	9.8	1.1	0	1	0
siCAV1	4.9	siCAV1_Area_055	5.04688	12.7769	-1.20312	0.3	0.204082	9.8	1.1	0	1	0
siCAV1	5.3	siCAV1_Area_055	5.3125	13.4494	0.265625	0.4	0.188679	9.8	1.1	0	1	0
siCAV1	5.6	siCAV1_Area_055	3.82812	9.69146	-1.48438	0.3	0.178571	9.8	1.1	0	1	0
siCAV1	6	siCAV1_Area_055	3.1875	8.06962	-0.640625	0.4	0.166667	9.8	1.1	0	1	0
siCAV1	6.3	siCAV1_Area_055	3.0625	7.75316	-0.125	0.3	0.15873	9.8	1.1	0	1	0
siCAV1	6.7	siCAV1_Area_055	2.75	6.96203	-0.3125	0.4	0.149254	9.8	1.1	0	1	0
siCAV1	7	siCAV1_Area_055	2.29688	5.81487	-0.453125	0.3	0.142857	9.8	1.1	0	1	0
siCAV1	7.4	siCAV1_Area_055	1.53125	3.87658	-0.765625	0.4	0.135135	9.8	1.1	0	1	0
siCAV1	7.7	siCAV1_Area_055	0.890625	2.25475	-0.640625	0.3	0.12987	9.8	1.1	0	1	0
siCAV1	9.8	siCAV1_Area_055	0	0	-0.890625	2.1	0.102041	9.8	1.1	0	1	0
siCAV1	0.4	siCAV1_Area_056	0	0			2.5	8.1	1.1	0	1	0
siCAV1	1.1	siCAV1_Area_056	19.3438	100	19.3438	0.7	0.909091	8.1	1.1	0	1	0
siCAV1	1.4	siCAV1_Area_056	18.6875	96.6074	-0.65625	0.3	0.714286	8.1	1.1	0	1	0
siCAV1	1.8	siCAV1_Area_056	18.6406	96.3651	-0.046875	0.4	0.555556	8.1	1.1	0	1	0
siCAV1	2.1	siCAV1_Area_056	18.5781	96.042	-0.0625	0.3	0.47619	8.1	1.1	0	1	0
siCAV1	2.5	siCAV1_Area_056	18.2031	94.1034	-0.375	0.4	0.4	8.1	1.1	0	1	0
siCAV1	2.8	siCAV1_Area_056	16.8125	86.9144	-1.39062	0.3	0.357143	8.1	1.1	0	1	0
siCAV1	3.2	siCAV1_Area_056	14.8125	76.5751	-2	0.4	0.3125	8.1	1.1	0	1	0
siCAV1	3.5	siCAV1_Area_056	13.2031	68.2553	-1.60938	0.3	0.285714	8.1	1.1	0	1	0
siCAV1	3.9	siCAV1_Area_056	11.4688	59.2892	-1.73438	0.4	0.25641	8.1	1.1	0	1	0
siCAV1	4.2	siCAV1_Area_056	9.04688	46.769	-2.42188	0.3	0.238095	8.1	1.1	0	1	0
siCAV1	4.6	siCAV1_Area_056	4.48438	23.1826	-4.5625	0.4	0.217391	8.1	1.1	0	1	0
siCAV1	4.9	siCAV1_Area_056	3.75	19.3861	-0.734375	0.3	0.204082	8.1	1.1	0	1	0
siCAV1	5.3	siCAV1_Area_056	3.40625	17.609	-0.34375	0.4	0.188679	8.1	1.1	0	1	0
siCAV1	5.6	siCAV1_Area_056	3.65625	18.9015	0.25	0.3	0.178571	8.1	1.1	0	1	0
siCAV1	6	siCAV1_Area_056	2.46875	12.7625	-1.1875	0.4	0.166667	8.1	1.1	0	1	0
siCAV1	6.3	siCAV1_Area_056	2.03125	10.5008	-0.4375	0.3	0.15873	8.1	1.1	0	1	0
siCAV1	6.7	siCAV1_Area_056	1.54688	7.99677	-0.484375	0.4	0.149254	8.1	1.1	0	1	0
siCAV1	8.1	siCAV1_Area_056	0	0	-1.54688	1.4	0.123457	8.1	1.1	0	1	0
siCAV1	0.4	siCAV1_Area_057	0	0			2.5	6.7	1.1	0	1	0
siCAV1	1.1	siCAV1_Area_057	17.875	100	17.875	0.7	0.909091	6.7	1.1	0	1	0
siCAV1	1.4	siCAV1_Area_057	16.7188	93.5315	-1.15625	0.3	0.714286	6.7	1.1	0	1	0
siCAV1	1.8	siCAV1_Area_057	15.2031	85.0524	-1.51562	0.4	0.555556	6.7	1.1	0	1	0
siCAV1	2.1	siCAV1_Area_057	14.375	80.4196	-0.828125	0.3	0.47619	6.7	1.1	0	1	0
siCAV1	2.5	siCAV1_Area_057	13.1719	73.6888	-1.20312	0.4	0.4	6.7	1.1	0	1	0
siCAV1	2.8	siCAV1_Area_057	12.3438	69.0559	-0.828125	0.3	0.357143	6.7	1.1	0	1	0
siCAV1	3.2	siCAV1_Area_057	10.375	58.042	-1.96875	0.4	0.3125	6.7	1.1	0	1	0
siCAV1	3.5	siCAV1_Area_057	7	39.1608	-3.375	0.3	0.285714	6.7	1.1	0	1	0
siCAV1	3.9	siCAV1_Area_057	4.28125	23.951	-2.71875	0.4	0.25641	6.7	1.1	0	1	0
siCAV1	4.2	siCAV1_Area_057	3.64062	20.3671	-0.640625	0.3	0.238095	6.7	1.1	0	1	0
siCAV1	4.6	siCAV1_Area_057	3.3125	18.5315	-0.328125	0.4	0.217391	6.7	1.1	0	1	0
siCAV1	4.9	siCAV1_Area_057	2.09375	11.7133	-1.21875	0.3	0.204082	6.7	1.1	0	1	0
siCAV1	5.3	siCAV1_Area_057	1.4375	8.04196	-0.65625	0.4	0.188679	6.7	1.1	0	1	0
siCAV1	5.6	siCAV1_Area_057	0.546875	3.05944	-0.890625	0.3	0.178571	6.7	1.1	0	1	0
siCAV1	6	siCAV1_Area_057	0.484375	2.70979	-0.0625	0.4	0.166667	6.7	1.1	0	1	0
siCAV1	6.7	siCAV1_Area_057	0	0	-0.484375	0.7	0.149254	6.7	1.1	0	1	0
siCAV1	0.4	siCAV1_Area_058	0	0			2.5	15.4	1.8	0	1	0
siCAV1	1.1	siCAV1_Area_058	71.6406	77.7646	71.6406	0.7	0.909091	15.4	1.8	0	1	0
siCAV1	1.4	siCAV1_Area_058	84.9375	92.1981	13.2969	0.3	0.714286	15.4	1.8	0	1	0
siCAV1	1.8	siCAV1_Area_058	92.125	100	7.1875	0.4	0.555556	15.4	1.8	0	1	0
siCAV1	2.1	siCAV1_Area_058	88.6719	96.2517	-3.45312	0.3	0.47619	15.4	1.8	0	1	0
siCAV1	2.5	siCAV1_Area_058	88.75	96.3365	0.078125	0.4	0.4	15.4	1.8	0	1	0
siCAV1	2.8	siCAV1_Area_058	87.4688	94.9457	-1.28125	0.3	0.357143	15.4	1.8	0	1	0
siCAV1	3.2	siCAV1_Area_058	89.1406	96.7605	1.67188	0.4	0.3125	15.4	1.8	0	1	0
siCAV1	3.5	siCAV1_Area_058	80.4844	87.3643	-8.65625	0.3	0.285714	15.4	1.8	0	1	0
siCAV1	3.9	siCAV1_Area_058	76.3906	82.9206	-4.09375	0.4	0.25641	15.4	1.8	0	1	0
siCAV1	4.2	siCAV1_Area_058	72.1094	78.2734	-4.28125	0.3	0.238095	15.4	1.8	0	1	0
siCAV1	4.6	siCAV1_Area_058	66.1406	71.7944	-5.96875	0.4	0.217391	15.4	1.8	0	1	0
siCAV1	4.9	siCAV1_Area_058	59.7031	64.8066	-6.4375	0.3	0.204082	15.4	1.8	0	1	0
siCAV1	5.3	siCAV1_Area_058	53.8125	58.4125	-5.89062	0.4	0.188679	15.4	1.8	0	1	0
siCAV1	5.6	siCAV1_Area_058	50.7812	55.1221	-3.03125	0.3	0.178571	15.4	1.8	0	1	0
siCAV1	6	siCAV1_Area_058	49	53.1886	-1.78125	0.4	0.166667	15.4	1.8	0	1	0
siCAV1	6.3	siCAV1_Area_058	42.9844	46.6588	-6.01562	0.3	0.15873	15.4	1.8	0	1	0
siCAV1	6.7	siCAV1_Area_058	34.1094	37.0251	-8.875	0.4	0.149254	15.4	1.8	0	1	0
siCAV1	7	siCAV1_Area_058	31.5781	34.2775	-2.53125	0.3	0.142857	15.4	1.8	0	1	0
siCAV1	7.4	siCAV1_Area_058	29.0469	31.5299	-2.53125	0.4	0.135135	15.4	1.8	0	1	0
siCAV1	7.7	siCAV1_Area_058	25.6406	27.8324	-3.40625	0.3	0.12987	15.4	1.8	0	1	0
siCAV1	8.1	siCAV1_Area_058	21.4219	23.2531	-4.21875	0.4	0.123457	15.4	1.8	0	1	0
siCAV1	8.4	siCAV1_Area_058	19.1406	20.7768	-2.28125	0.3	0.119048	15.4	1.8	0	1	0
siCAV1	8.8	siCAV1_Area_058	14.1719	15.3833	-4.96875	0.4	0.113636	15.4	1.8	0	1	0
siCAV1	9.1	siCAV1_Area_058	12.4219	13.4837	-1.75	0.3	0.10989	15.4	1.8	0	1	0
siCAV1	9.5	siCAV1_Area_058	8.8125	9.56581	-3.60938	0.4	0.105263	15.4	1.8	0	1	0
siCAV1	9.8	siCAV1_Area_058	6.21875	6.75034	-2.59375	0.3	0.102041	15.4	1.8	0	1	0
siCAV1	10.2	siCAV1_Area_058	5.10938	5.54613	-1.10938	0.4	0.0980392	15.4	1.8	0	1	0
siCAV1	10.5	siCAV1_Area_058	4.125	4.47761	-0.984375	0.3	0.0952381	15.4	1.8	0	1	0
siCAV1	10.9	siCAV1_Area_058	3.625	3.93487	-0.5	0.4	0.0917431	15.4	1.8	0	1	0
siCAV1	11.2	siCAV1_Area_058	4.34375	4.71506	0.71875	0.3	0.0892857	15.4	1.8	0	1	0
siCAV1	11.6	siCAV1_Area_058	4.03125	4.37585	-0.3125	0.4	0.0862069	15.4	1.8	0	1	0
siCAV1	11.9	siCAV1_Area_058	3.48438	3.78223	-0.546875	0.3	0.0840336	15.4	1.8	0	1	0
siCAV1	12.3	siCAV1_Area_058	2.1875	2.37449	-1.29688	0.4	0.0813008	15.4	1.8	0	1	0
siCAV1	12.6	siCAV1_Area_058	1.85938	2.01832	-0.328125	0.3	0.0793651	15.4	1.8	0	1	0
siCAV1	13	siCAV1_Area_058	1.51562	1.64518	-0.34375	0.4	0.0769231	15.4	1.8	0	1	0
siCAV1	13.3	siCAV1_Area_058	1.4375	1.56038	-0.078125	0.3	0.075188	15.4	1.8	0	1	0
siCAV1	13.7	siCAV1_Area_058	1.25	1.35685	-0.1875	0.4	0.0729927	15.4	1.8	0	1	0
siCAV1	14	siCAV1_Area_058	1.15625	1.25509	-0.09375	0.3	0.0714286	15.4	1.8	0	1	0
siCAV1	14.4	siCAV1_Area_058	0.671875	0.729308	-0.484375	0.4	0.0694444	15.4	1.8	0	1	0
siCAV1	14.7	siCAV1_Area_058	0.59375	0.644505	-0.078125	0.3	0.0680272	15.4	1.8	0	1	0
siCAV1	15.4	siCAV1_Area_058	0	0	-0.59375	0.7	0.0649351	15.4	1.8	0	1	0
siCAV1	0.4	siCAV1_Area_059	0	0			2.5	6.7	1.1	0	1	0
siCAV1	1.1	siCAV1_Area_059	22.1562	100	22.1562	0.7	0.909091	6.7	1.1	0	1	0
siCAV1	1.4	siCAV1_Area_059	20.8281	94.0056	-1.32812	0.3	0.714286	6.7	1.1	0	1	0
siCAV1	1.8	siCAV1_Area_059	19.7656	89.2102	-1.0625	0.4	0.555556	6.7	1.1	0	1	0
siCAV1	2.1	siCAV1_Area_059	19.5938	88.4344	-0.171875	0.3	0.47619	6.7	1.1	0	1	0
siCAV1	2.5	siCAV1_Area_059	21.3125	96.1918	1.71875	0.4	0.4	6.7	1.1	0	1	0
siCAV1	2.8	siCAV1_Area_059	17.1562	77.433	-4.15625	0.3	0.357143	6.7	1.1	0	1	0
siCAV1	3.2	siCAV1_Area_059	14.3906	64.9506	-2.76562	0.4	0.3125	6.7	1.1	0	1	0
siCAV1	3.5	siCAV1_Area_059	12.5312	56.5585	-1.85938	0.3	0.285714	6.7	1.1	0	1	0
siCAV1	3.9	siCAV1_Area_059	11.2031	50.5642	-1.32812	0.4	0.25641	6.7	1.1	0	1	0
siCAV1	4.2	siCAV1_Area_059	8.59375	38.787	-2.60938	0.3	0.238095	6.7	1.1	0	1	0
siCAV1	4.6	siCAV1_Area_059	6.98438	31.5233	-1.60938	0.4	0.217391	6.7	1.1	0	1	0
siCAV1	4.9	siCAV1_Area_059	5.60938	25.3173	-1.375	0.3	0.204082	6.7	1.1	0	1	0
siCAV1	5.3	siCAV1_Area_059	3.45312	15.5853	-2.15625	0.4	0.188679	6.7	1.1	0	1	0
siCAV1	5.6	siCAV1_Area_059	2.0625	9.30889	-1.39062	0.3	0.178571	6.7	1.1	0	1	0
siCAV1	6	siCAV1_Area_059	1.51562	6.84062	-0.546875	0.4	0.166667	6.7	1.1	0	1	0
siCAV1	6.3	siCAV1_Area_059	1.14062	5.1481	-0.375	0.3	0.15873	6.7	1.1	0	1	0
siCAV1	6.7	siCAV1_Area_059	0	0	-1.14062	0.4	0.149254	6.7	1.1	0	1	0
siCAV1	0.4	siCAV1_Area_060	0	0			2.5	8.4	1.1	0	1	0
siCAV1	1.1	siCAV1_Area_060	52.3594	100	52.3594	0.7	0.909091	8.4	1.1	0	1	0
siCAV1	1.4	siCAV1_Area_060	48.9219	93.4348	-3.4375	0.3	0.714286	8.4	1.1	0	1	0
siCAV1	1.8	siCAV1_Area_060	46.8906	89.5554	-2.03125	0.4	0.555556	8.4	1.1	0	1	0
siCAV1	2.1	siCAV1_Area_060	44.1406	84.3032	-2.75	0.3	0.47619	8.4	1.1	0	1	0
siCAV1	2.5	siCAV1_Area_060	40.7344	77.7977	-3.40625	0.4	0.4	8.4	1.1	0	1	0
siCAV1	2.8	siCAV1_Area_060	32.875	62.7872	-7.85938	0.3	0.357143	8.4	1.1	0	1	0
siCAV1	3.2	siCAV1_Area_060	27.7656	53.0289	-5.10938	0.4	0.3125	8.4	1.1	0	1	0
siCAV1	3.5	siCAV1_Area_060	26.75	51.0892	-1.01562	0.3	0.285714	8.4	1.1	0	1	0
siCAV1	3.9	siCAV1_Area_060	24.0938	46.0161	-2.65625	0.4	0.25641	8.4	1.1	0	1	0
siCAV1	4.2	siCAV1_Area_060	19.4062	37.0636	-4.6875	0.3	0.238095	8.4	1.1	0	1	0
siCAV1	4.6	siCAV1_Area_060	16.3594	31.2444	-3.04688	0.4	0.217391	8.4	1.1	0	1	0
siCAV1	4.9	siCAV1_Area_060	12.7344	24.3211	-3.625	0.3	0.204082	8.4	1.1	0	1	0
siCAV1	5.3	siCAV1_Area_060	11.0781	21.1579	-1.65625	0.4	0.188679	8.4	1.1	0	1	0
siCAV1	5.6	siCAV1_Area_060	7.40625	14.145	-3.67188	0.3	0.178571	8.4	1.1	0	1	0
siCAV1	6	siCAV1_Area_060	5.40625	10.3253	-2	0.4	0.166667	8.4	1.1	0	1	0
siCAV1	6.3	siCAV1_Area_060	4.82812	9.22113	-0.578125	0.3	0.15873	8.4	1.1	0	1	0
siCAV1	6.7	siCAV1_Area_060	3.40625	6.50552	-1.42188	0.4	0.149254	8.4	1.1	0	1	0
siCAV1	7	siCAV1_Area_060	3.09375	5.90868	-0.3125	0.3	0.142857	8.4	1.1	0	1	0
siCAV1	7.4	siCAV1_Area_060	2.20312	4.2077	-0.890625	0.4	0.135135	8.4	1.1	0	1	0
siCAV1	7.7	siCAV1_Area_060	0.921875	1.76067	-1.28125	0.3	0.12987	8.4	1.1	0	1	0
siCAV1	8.1	siCAV1_Area_060	0.609375	1.16383	-0.3125	0.4	0.123457	8.4	1.1	0	1	0
siCAV1	8.4	siCAV1_Area_060	0	0	-0.609375	0.3	0.119048	8.4	1.1	0	1	0
siCAV1	0.4	siCAV1_Area_061	0	0			2.5	7.4	1.1	0	1	0
siCAV1	0.7	siCAV1_Area_061	112.797	97.6861	112.797	0.3	1.42857	7.4	1.1	0	1	0
siCAV1	1.1	siCAV1_Area_061	115.469	100	2.67188	0.4	0.909091	7.4	1.1	0	1	0
siCAV1	1.4	siCAV1_Area_061	113.891	98.6333	-1.57812	0.3	0.714286	7.4	1.1	0	1	0
siCAV1	1.8	siCAV1_Area_061	114.75	99.3775	0.859375	0.4	0.555556	7.4	1.1	0	1	0
siCAV1	2.1	siCAV1_Area_061	115	99.594	0.25	0.3	0.47619	7.4	1.1	0	1	0
siCAV1	2.5	siCAV1_Area_061	112.672	97.5778	-2.32812	0.4	0.4	7.4	1.1	0	1	0
siCAV1	2.8	siCAV1_Area_061	107.5	93.0988	-5.17188	0.3	0.357143	7.4	1.1	0	1	0
siCAV1	3.2	siCAV1_Area_061	106.188	91.9621	-1.3125	0.4	0.3125	7.4	1.1	0	1	0
siCAV1	3.5	siCAV1_Area_061	106.188	91.9621	0	0.3	0.285714	7.4	1.1	0	1	0
siCAV1	3.9	siCAV1_Area_061	105.219	91.1231	-0.96875	0.4	0.25641	7.4	1.1	0	1	0
siCAV1	4.2	siCAV1_Area_061	94.1406	81.5291	-11.0781	0.3	0.238095	7.4	1.1	0	1	0
siCAV1	4.6	siCAV1_Area_061	90.625	78.4844	-3.51562	0.4	0.217391	7.4	1.1	0	1	0
siCAV1	4.9	siCAV1_Area_061	88.7656	76.8742	-1.85938	0.3	0.204082	7.4	1.1	0	1	0
siCAV1	5.3	siCAV1_Area_061	78.7656	68.2138	-10	0.4	0.188679	7.4	1.1	0	1	0
siCAV1	5.6	siCAV1_Area_061	64.5	55.8593	-14.2656	0.3	0.178571	7.4	1.1	0	1	0
siCAV1	6	siCAV1_Area_061	60.0312	51.9892	-4.46875	0.4	0.166667	7.4	1.1	0	1	0
siCAV1	6.3	siCAV1_Area_061	48.2031	41.7456	-11.8281	0.3	0.15873	7.4	1.1	0	1	0
siCAV1	6.7	siCAV1_Area_061	18.3594	15.8999	-29.8438	0.4	0.149254	7.4	1.1	0	1	0
siCAV1	7.4	siCAV1_Area_061	0	0	-18.3594	0.7	0.135135	7.4	1.1	0	1	0
siCAV1	0.4	siCAV1_Area_062	0	0			2.5	9.1	1.1	0	1	0
siCAV1	0.7	siCAV1_Area_062	68.5625	95.1431	68.5625	0.3	1.42857	9.1	1.1	0	1	0
siCAV1	1.1	siCAV1_Area_062	72.0625	100	3.5	0.4	0.909091	9.1	1.1	0	1	0
siCAV1	1.4	siCAV1_Area_062	71.1406	98.7207	-0.921875	0.3	0.714286	9.1	1.1	0	1	0
siCAV1	1.8	siCAV1_Area_062	68.1406	94.5577	-3	0.4	0.555556	9.1	1.1	0	1	0
siCAV1	2.1	siCAV1_Area_062	66.5469	92.3461	-1.59375	0.3	0.47619	9.1	1.1	0	1	0
siCAV1	2.5	siCAV1_Area_062	63.9219	88.7034	-2.625	0.4	0.4	9.1	1.1	0	1	0
siCAV1	2.8	siCAV1_Area_062	59.4219	82.4588	-4.5	0.3	0.357143	9.1	1.1	0	1	0
siCAV1	3.2	siCAV1_Area_062	56.6562	78.621	-2.76562	0.4	0.3125	9.1	1.1	0	1	0
siCAV1	3.5	siCAV1_Area_062	52.8906	73.3955	-3.76562	0.3	0.285714	9.1	1.1	0	1	0
siCAV1	3.9	siCAV1_Area_062	47.7656	66.2836	-5.125	0.4	0.25641	9.1	1.1	0	1	0
siCAV1	4.2	siCAV1_Area_062	43.5	60.3643	-4.26562	0.3	0.238095	9.1	1.1	0	1	0
siCAV1	4.6	siCAV1_Area_062	40.4531	56.1362	-3.04688	0.4	0.217391	9.1	1.1	0	1	0
siCAV1	4.9	siCAV1_Area_062	38.3906	53.2741	-2.0625	0.3	0.204082	9.1	1.1	0	1	0
siCAV1	5.3	siCAV1_Area_062	37	51.3443	-1.39062	0.4	0.188679	9.1	1.1	0	1	0
siCAV1	5.6	siCAV1_Area_062	35.2188	48.8725	-1.78125	0.3	0.178571	9.1	1.1	0	1	0
siCAV1	6	siCAV1_Area_062	30.8125	42.758	-4.40625	0.4	0.166667	9.1	1.1	0	1	0
siCAV1	6.3	siCAV1_Area_062	24.5781	34.1067	-6.23438	0.3	0.15873	9.1	1.1	0	1	0
siCAV1	6.7	siCAV1_Area_062	17.1875	23.8508	-7.39062	0.4	0.149254	9.1	1.1	0	1	0
siCAV1	7	siCAV1_Area_062	12.0469	16.7173	-5.14062	0.3	0.142857	9.1	1.1	0	1	0
siCAV1	7.4	siCAV1_Area_062	8.20312	11.3833	-3.84375	0.4	0.135135	9.1	1.1	0	1	0
siCAV1	7.7	siCAV1_Area_062	6.09375	8.4562	-2.10938	0.3	0.12987	9.1	1.1	0	1	0
siCAV1	8.1	siCAV1_Area_062	3.65625	5.07372	-2.4375	0.4	0.123457	9.1	1.1	0	1	0
siCAV1	8.4	siCAV1_Area_062	2.39062	3.31743	-1.26562	0.3	0.119048	9.1	1.1	0	1	0
siCAV1	8.8	siCAV1_Area_062	1.5625	2.16826	-0.828125	0.4	0.113636	9.1	1.1	0	1	0
siCAV1	9.1	siCAV1_Area_062	0	0	-1.5625	0.3	0.10989	9.1	1.1	0	1	0
siCAV1	0.4	siCAV1_Area_063	0	0			2.5	4.9	1.4	0	1	0
siCAV1	1.1	siCAV1_Area_063	4.40625	94.9495	4.40625	0.7	0.909091	4.9	1.4	0	1	0
siCAV1	1.4	siCAV1_Area_063	4.64062	100	0.234375	0.3	0.714286	4.9	1.4	0	1	0
siCAV1	1.8	siCAV1_Area_063	3.79688	81.8182	-0.84375	0.4	0.555556	4.9	1.4	0	1	0
siCAV1	2.1	siCAV1_Area_063	4	86.1953	0.203125	0.3	0.47619	4.9	1.4	0	1	0
siCAV1	2.5	siCAV1_Area_063	3.98438	85.8586	-0.015625	0.4	0.4	4.9	1.4	0	1	0
siCAV1	2.8	siCAV1_Area_063	3.54688	76.431	-0.4375	0.3	0.357143	4.9	1.4	0	1	0
siCAV1	3.2	siCAV1_Area_063	3.375	72.7273	-0.171875	0.4	0.3125	4.9	1.4	0	1	0
siCAV1	3.5	siCAV1_Area_063	2.42188	52.1886	-0.953125	0.3	0.285714	4.9	1.4	0	1	0
siCAV1	3.9	siCAV1_Area_063	2.01562	43.4343	-0.40625	0.4	0.25641	4.9	1.4	0	1	0
siCAV1	4.9	siCAV1_Area_063	0	0	-2.01562	1	0.204082	4.9	1.4	0	1	0
siCAV1	0.4	siCAV1_Area_064	0	0			2.5	7	1.1	0	1	0
siCAV1	1.1	siCAV1_Area_064	13.125	100	13.125	0.7	0.909091	7	1.1	0	1	0
siCAV1	1.4	siCAV1_Area_064	12.5469	95.5952	-0.578125	0.3	0.714286	7	1.1	0	1	0
siCAV1	1.8	siCAV1_Area_064	12.875	98.0952	0.328125	0.4	0.555556	7	1.1	0	1	0
siCAV1	2.1	siCAV1_Area_064	10.4062	79.2857	-2.46875	0.3	0.47619	7	1.1	0	1	0
siCAV1	2.5	siCAV1_Area_064	9.82812	74.881	-0.578125	0.4	0.4	7	1.1	0	1	0
siCAV1	2.8	siCAV1_Area_064	8.96875	68.3333	-0.859375	0.3	0.357143	7	1.1	0	1	0
siCAV1	3.2	siCAV1_Area_064	6.26562	47.7381	-2.70312	0.4	0.3125	7	1.1	0	1	0
siCAV1	3.5	siCAV1_Area_064	5.25	40	-1.01562	0.3	0.285714	7	1.1	0	1	0
siCAV1	3.9	siCAV1_Area_064	5.51562	42.0238	0.265625	0.4	0.25641	7	1.1	0	1	0
siCAV1	4.2	siCAV1_Area_064	5.125	39.0476	-0.390625	0.3	0.238095	7	1.1	0	1	0
siCAV1	4.6	siCAV1_Area_064	4.32812	32.9762	-0.796875	0.4	0.217391	7	1.1	0	1	0
siCAV1	4.9	siCAV1_Area_064	4.32812	32.9762	0	0.3	0.204082	7	1.1	0	1	0
siCAV1	5.3	siCAV1_Area_064	3.75	28.5714	-0.578125	0.4	0.188679	7	1.1	0	1	0
siCAV1	5.6	siCAV1_Area_064	2.78125	21.1905	-0.96875	0.3	0.178571	7	1.1	0	1	0
siCAV1	6	siCAV1_Area_064	3.125	23.8095	0.34375	0.4	0.166667	7	1.1	0	1	0
siCAV1	6.3	siCAV1_Area_064	2.29688	17.5	-0.828125	0.3	0.15873	7	1.1	0	1	0
siCAV1	7	siCAV1_Area_064	0	0	-2.29688	0.7	0.142857	7	1.1	0	1	0
siCAV1	0.4	siCAV1_Area_065	0	0			2.5	6.3	1.8	0	1	0
siCAV1	1.1	siCAV1_Area_065	9.78125	88.4181	9.78125	0.7	0.909091	6.3	1.8	0	1	0
siCAV1	1.4	siCAV1_Area_065	10.5	94.9153	0.71875	0.3	0.714286	6.3	1.8	0	1	0
siCAV1	1.8	siCAV1_Area_065	11.0625	100	0.5625	0.4	0.555556	6.3	1.8	0	1	0
siCAV1	2.1	siCAV1_Area_065	10.0625	90.9605	-1	0.3	0.47619	6.3	1.8	0	1	0
siCAV1	2.5	siCAV1_Area_065	8.73438	78.9548	-1.32812	0.4	0.4	6.3	1.8	0	1	0
siCAV1	2.8	siCAV1_Area_065	7.4375	67.2316	-1.29688	0.3	0.357143	6.3	1.8	0	1	0
siCAV1	3.2	siCAV1_Area_065	8.57812	77.5424	1.14062	0.4	0.3125	6.3	1.8	0	1	0
siCAV1	3.5	siCAV1_Area_065	8.8125	79.661	0.234375	0.3	0.285714	6.3	1.8	0	1	0
siCAV1	3.9	siCAV1_Area_065	5.17188	46.7514	-3.64062	0.4	0.25641	6.3	1.8	0	1	0
siCAV1	4.2	siCAV1_Area_065	3.8125	34.4633	-1.35938	0.3	0.238095	6.3	1.8	0	1	0
siCAV1	4.6	siCAV1_Area_065	2.4375	22.0339	-1.375	0.4	0.217391	6.3	1.8	0	1	0
siCAV1	4.9	siCAV1_Area_065	2.21875	20.0565	-0.21875	0.3	0.204082	6.3	1.8	0	1	0
siCAV1	5.3	siCAV1_Area_065	1.71875	15.5367	-0.5	0.4	0.188679	6.3	1.8	0	1	0
siCAV1	5.6	siCAV1_Area_065	1.32812	12.0056	-0.390625	0.3	0.178571	6.3	1.8	0	1	0
siCAV1	6	siCAV1_Area_065	0.65625	5.9322	-0.671875	0.4	0.166667	6.3	1.8	0	1	0
siCAV1	6.3	siCAV1_Area_065	0	0	-0.65625	0.3	0.15873	6.3	1.8	0	1	0
siCAV1	0.4	siCAV1_Area_066	0	0			2.5	3.5	0.7	0	1	0
siCAV1	0.7	siCAV1_Area_066	48.0156	100	48.0156	0.3	1.42857	3.5	0.7	0	1	0
siCAV1	1.1	siCAV1_Area_066	45.2656	94.2727	-2.75	0.4	0.909091	3.5	0.7	0	1	0
siCAV1	1.4	siCAV1_Area_066	40.5469	84.4452	-4.71875	0.3	0.714286	3.5	0.7	0	1	0
siCAV1	1.8	siCAV1_Area_066	33.2344	69.2158	-7.3125	0.4	0.555556	3.5	0.7	0	1	0
siCAV1	2.1	siCAV1_Area_066	22.5312	46.9248	-10.7031	0.3	0.47619	3.5	0.7	0	1	0
siCAV1	2.5	siCAV1_Area_066	14.4219	30.0358	-8.10938	0.4	0.4	3.5	0.7	0	1	0
siCAV1	2.8	siCAV1_Area_066	6.03125	12.561	-8.39062	0.3	0.357143	3.5	0.7	0	1	0
siCAV1	3.5	siCAV1_Area_066	0	0	-6.03125	0.7	0.285714	3.5	0.7	0	1	0
siCAV1	0.4	siCAV1_Area_067	0	0			2.5	5.6	1.1	0	1	0
siCAV1	1.1	siCAV1_Area_067	15.8438	100	15.8438	0.7	0.909091	5.6	1.1	0	1	0
siCAV1	1.4	siCAV1_Area_067	13.5	85.2071	-2.34375	0.3	0.714286	5.6	1.1	0	1	0
siCAV1	1.8	siCAV1_Area_067	14.1719	89.4477	0.671875	0.4	0.555556	5.6	1.1	0	1	0
siCAV1	2.1	siCAV1_Area_067	11.375	71.7949	-2.79688	0.3	0.47619	5.6	1.1	0	1	0
siCAV1	2.5	siCAV1_Area_067	10.7188	67.6529	-0.65625	0.4	0.4	5.6	1.1	0	1	0
siCAV1	2.8	siCAV1_Area_067	8.28125	52.2682	-2.4375	0.3	0.357143	5.6	1.1	0	1	0
siCAV1	3.2	siCAV1_Area_067	4.15625	26.2327	-4.125	0.4	0.3125	5.6	1.1	0	1	0
siCAV1	3.5	siCAV1_Area_067	3.39062	21.4004	-0.765625	0.3	0.285714	5.6	1.1	0	1	0
siCAV1	3.9	siCAV1_Area_067	2.75	17.357	-0.640625	0.4	0.25641	5.6	1.1	0	1	0
siCAV1	4.2	siCAV1_Area_067	3.625	22.8797	0.875	0.3	0.238095	5.6	1.1	0	1	0
siCAV1	4.6	siCAV1_Area_067	2.84375	17.9487	-0.78125	0.4	0.217391	5.6	1.1	0	1	0
siCAV1	4.9	siCAV1_Area_067	2.25	14.2012	-0.59375	0.3	0.204082	5.6	1.1	0	1	0
siCAV1	5.3	siCAV1_Area_067	2.375	14.9901	0.125	0.4	0.188679	5.6	1.1	0	1	0
siCAV1	5.6	siCAV1_Area_067	0	0	-2.375	0.3	0.178571	5.6	1.1	0	1	0
siCAV1	0.4	siCAV1_Area_068	0	0			2.5	2.5	1.1	0	1	0
siCAV1	1.1	siCAV1_Area_068	7.32812	100	7.32812	0.7	0.909091	2.5	1.1	0	1	0
siCAV1	1.4	siCAV1_Area_068	7.20312	98.2942	-0.125	0.3	0.714286	2.5	1.1	0	1	0
siCAV1	1.8	siCAV1_Area_068	4.20312	57.3561	-3	0.4	0.555556	2.5	1.1	0	1	0
siCAV1	2.5	siCAV1_Area_068	0	0	-4.20312	0.7	0.4	2.5	1.1	0	1	0
siCAV1	0.4	siCAV1_Area_069	0	0			2.5	3.5	1.8	0	1	0
siCAV1	1.8	siCAV1_Area_069	4.71875	100	4.71875	1.4	0.555556	3.5	1.8	0	1	0
siCAV1	2.1	siCAV1_Area_069	4.25	90.0662	-0.46875	0.3	0.47619	3.5	1.8	0	1	0
siCAV1	2.5	siCAV1_Area_069	3.5625	75.4967	-0.6875	0.4	0.4	3.5	1.8	0	1	0
siCAV1	2.8	siCAV1_Area_069	3.39062	71.8543	-0.171875	0.3	0.357143	3.5	1.8	0	1	0
siCAV1	3.2	siCAV1_Area_069	1.67188	35.4305	-1.71875	0.4	0.3125	3.5	1.8	0	1	0
siCAV1	3.5	siCAV1_Area_069	0	0	-1.67188	0.3	0.285714	3.5	1.8	0	1	0
siCAV1	0.4	siCAV1_Area_070	0	0			2.5	2.5	0.7	0	1	0
siCAV1	0.7	siCAV1_Area_070	5.25	100	5.25	0.3	1.42857	2.5	0.7	0	1	0
siCAV1	1.1	siCAV1_Area_070	5.14062	97.9167	-0.109375	0.4	0.909091	2.5	0.7	0	1	0
siCAV1	1.4	siCAV1_Area_070	4.96875	94.6429	-0.171875	0.3	0.714286	2.5	0.7	0	1	0
siCAV1	1.8	siCAV1_Area_070	4.35938	83.0357	-0.609375	0.4	0.555556	2.5	0.7	0	1	0
siCAV1	2.1	siCAV1_Area_070	2.64062	50.2976	-1.71875	0.3	0.47619	2.5	0.7	0	1	0
siCAV1	2.5	siCAV1_Area_070	0	0	-2.64062	0.4	0.4	2.5	0.7	0	1	0
siCAV1	0.4	siCAV1_Area_071	0	0			2.5	4.2	1.8	0	1	0
siCAV1	0.7	siCAV1_Area_071	8.21875	94.2652	8.21875	0.3	1.42857	4.2	1.8	0	1	0
siCAV1	1.1	siCAV1_Area_071	8.4375	96.7742	0.21875	0.4	0.909091	4.2	1.8	0	1	0
siCAV1	1.4	siCAV1_Area_071	8.21875	94.2652	-0.21875	0.3	0.714286	4.2	1.8	0	1	0
siCAV1	1.8	siCAV1_Area_071	8.71875	100	0.5	0.4	0.555556	4.2	1.8	0	1	0
siCAV1	2.1	siCAV1_Area_071	7.04688	80.8244	-1.67188	0.3	0.47619	4.2	1.8	0	1	0
siCAV1	2.5	siCAV1_Area_071	5.96875	68.4588	-1.07812	0.4	0.4	4.2	1.8	0	1	0
siCAV1	2.8	siCAV1_Area_071	5.0625	58.0645	-0.90625	0.3	0.357143	4.2	1.8	0	1	0
siCAV1	3.2	siCAV1_Area_071	4.09375	46.9534	-0.96875	0.4	0.3125	4.2	1.8	0	1	0
siCAV1	3.5	siCAV1_Area_071	2.82812	32.4373	-1.26562	0.3	0.285714	4.2	1.8	0	1	0
siCAV1	3.9	siCAV1_Area_071	1.09375	12.5448	-1.73438	0.4	0.25641	4.2	1.8	0	1	0
siCAV1	4.2	siCAV1_Area_071	0	0	-1.09375	0.3	0.238095	4.2	1.8	0	1	0
siCAV1	0.4	siCAV1_Area_072	0	0			2.5	10.5	1.4	0	1	0
siCAV1	0.7	siCAV1_Area_072	52.6094	93.9978	52.6094	0.3	1.42857	10.5	1.4	0	1	0
siCAV1	1.1	siCAV1_Area_072	54.2969	97.0128	1.6875	0.4	0.909091	10.5	1.4	0	1	0
siCAV1	1.4	siCAV1_Area_072	55.9688	100	1.67188	0.3	0.714286	10.5	1.4	0	1	0
siCAV1	1.8	siCAV1_Area_072	54.7969	97.9062	-1.17188	0.4	0.555556	10.5	1.4	0	1	0
siCAV1	2.1	siCAV1_Area_072	51.6094	92.2111	-3.1875	0.3	0.47619	10.5	1.4	0	1	0
siCAV1	2.5	siCAV1_Area_072	48.1719	86.0692	-3.4375	0.4	0.4	10.5	1.4	0	1	0
siCAV1	2.8	siCAV1_Area_072	43.2812	77.3311	-4.89062	0.3	0.357143	10.5	1.4	0	1	0
siCAV1	3.2	siCAV1_Area_072	38.5469	68.8721	-4.73438	0.4	0.3125	10.5	1.4	0	1	0
siCAV1	3.5	siCAV1_Area_072	33.3906	59.6594	-5.15625	0.3	0.285714	10.5	1.4	0	1	0
siCAV1	3.9	siCAV1_Area_072	30.8594	55.1368	-2.53125	0.4	0.25641	10.5	1.4	0	1	0
siCAV1	4.2	siCAV1_Area_072	27.9062	49.8604	-2.95312	0.3	0.238095	10.5	1.4	0	1	0
siCAV1	4.6	siCAV1_Area_072	26.6719	47.6549	-1.23438	0.4	0.217391	10.5	1.4	0	1	0
siCAV1	4.9	siCAV1_Area_072	23.6562	42.2669	-3.01562	0.3	0.204082	10.5	1.4	0	1	0
siCAV1	5.3	siCAV1_Area_072	19.6719	35.148	-3.98438	0.4	0.188679	10.5	1.4	0	1	0
siCAV1	5.6	siCAV1_Area_072	13.8281	24.7069	-5.84375	0.3	0.178571	10.5	1.4	0	1	0
siCAV1	6	siCAV1_Area_072	11.9062	21.273	-1.92188	0.4	0.166667	10.5	1.4	0	1	0
siCAV1	6.3	siCAV1_Area_072	10	17.8671	-1.90625	0.3	0.15873	10.5	1.4	0	1	0
siCAV1	6.7	siCAV1_Area_072	8.0625	14.4054	-1.9375	0.4	0.149254	10.5	1.4	0	1	0
siCAV1	7	siCAV1_Area_072	6.92188	12.3674	-1.14062	0.3	0.142857	10.5	1.4	0	1	0
siCAV1	7.4	siCAV1_Area_072	5.09375	9.10106	-1.82812	0.4	0.135135	10.5	1.4	0	1	0
siCAV1	7.7	siCAV1_Area_072	4.76562	8.5148	-0.328125	0.3	0.12987	10.5	1.4	0	1	0
siCAV1	8.1	siCAV1_Area_072	4.10938	7.34227	-0.65625	0.4	0.123457	10.5	1.4	0	1	0
siCAV1	8.4	siCAV1_Area_072	3.96875	7.09101	-0.140625	0.3	0.119048	10.5	1.4	0	1	0
siCAV1	8.8	siCAV1_Area_072	3.0625	5.4718	-0.90625	0.4	0.113636	10.5	1.4	0	1	0
siCAV1	9.1	siCAV1_Area_072	2.67188	4.77387	-0.390625	0.3	0.10989	10.5	1.4	0	1	0
siCAV1	9.5	siCAV1_Area_072	2.1875	3.90843	-0.484375	0.4	0.105263	10.5	1.4	0	1	0
siCAV1	9.8	siCAV1_Area_072	1.51562	2.70798	-0.671875	0.3	0.102041	10.5	1.4	0	1	0
siCAV1	10.2	siCAV1_Area_072	1.29688	2.31714	-0.21875	0.4	0.0980392	10.5	1.4	0	1	0
siCAV1	10.5	siCAV1_Area_072	0	0	-1.29688	0.3	0.0952381	10.5	1.4	0	1	0
siCAV1	0.4	siCAV1_Area_073	0	0			2.5	8.8	2.1	0	1	0
siCAV1	0.7	siCAV1_Area_073	23.7344	85.5293	23.7344	0.3	1.42857	8.8	2.1	0	1	0
siCAV1	1.1	siCAV1_Area_073	25.9062	93.3559	2.17188	0.4	0.909091	8.8	2.1	0	1	0
siCAV1	1.4	siCAV1_Area_073	27.4531	98.9302	1.54688	0.3	0.714286	8.8	2.1	0	1	0
siCAV1	1.8	siCAV1_Area_073	27.6875	99.7748	0.234375	0.4	0.555556	8.8	2.1	0	1	0
siCAV1	2.1	siCAV1_Area_073	27.75	100	0.0625	0.3	0.47619	8.8	2.1	0	1	0
siCAV1	2.5	siCAV1_Area_073	26.7188	96.2838	-1.03125	0.4	0.4	8.8	2.1	0	1	0
siCAV1	2.8	siCAV1_Area_073	26.75	96.3964	0.03125	0.3	0.357143	8.8	2.1	0	1	0
siCAV1	3.2	siCAV1_Area_073	25.5156	91.9482	-1.23438	0.4	0.3125	8.8	2.1	0	1	0
siCAV1	3.5	siCAV1_Area_073	23.3125	84.009	-2.20312	0.3	0.285714	8.8	2.1	0	1	0
siCAV1	3.9	siCAV1_Area_073	19.6094	70.6644	-3.70312	0.4	0.25641	8.8	2.1	0	1	0
siCAV1	4.2	siCAV1_Area_073	17.5781	63.3446	-2.03125	0.3	0.238095	8.8	2.1	0	1	0
siCAV1	4.6	siCAV1_Area_073	15.7812	56.8694	-1.79688	0.4	0.217391	8.8	2.1	0	1	0
siCAV1	4.9	siCAV1_Area_073	12.7031	45.777	-3.07812	0.3	0.204082	8.8	2.1	0	1	0
siCAV1	5.3	siCAV1_Area_073	11.8438	42.6802	-0.859375	0.4	0.188679	8.8	2.1	0	1	0
siCAV1	5.6	siCAV1_Area_073	9.75	35.1351	-2.09375	0.3	0.178571	8.8	2.1	0	1	0
siCAV1	6	siCAV1_Area_073	7.92188	28.5473	-1.82812	0.4	0.166667	8.8	2.1	0	1	0
siCAV1	6.3	siCAV1_Area_073	6.9375	25	-0.984375	0.3	0.15873	8.8	2.1	0	1	0
siCAV1	6.7	siCAV1_Area_073	5.51562	19.8761	-1.42188	0.4	0.149254	8.8	2.1	0	1	0
siCAV1	7	siCAV1_Area_073	3.98438	14.3581	-1.53125	0.3	0.142857	8.8	2.1	0	1	0
siCAV1	7.4	siCAV1_Area_073	3.64062	13.1194	-0.34375	0.4	0.135135	8.8	2.1	0	1	0
siCAV1	7.7	siCAV1_Area_073	3.26562	11.768	-0.375	0.3	0.12987	8.8	2.1	0	1	0
siCAV1	8.1	siCAV1_Area_073	2.42188	8.72748	-0.84375	0.4	0.123457	8.8	2.1	0	1	0
siCAV1	8.4	siCAV1_Area_073	0.8125	2.92793	-1.60938	0.3	0.119048	8.8	2.1	0	1	0
siCAV1	8.8	siCAV1_Area_073	0	0	-0.8125	0.4	0.113636	8.8	2.1	0	1	0
siCAV1	0.4	siCAV1_Area_074	0	0			2.5	7	1.4	0	1	0
siCAV1	0.7	siCAV1_Area_074	27.3125	94.181	27.3125	0.3	1.42857	7	1.4	0	1	0
siCAV1	1.1	siCAV1_Area_074	27.4375	94.6121	0.125	0.4	0.909091	7	1.4	0	1	0
siCAV1	1.4	siCAV1_Area_074	29	100	1.5625	0.3	0.714286	7	1.4	0	1	0
siCAV1	1.8	siCAV1_Area_074	28.5156	98.3297	-0.484375	0.4	0.555556	7	1.4	0	1	0
siCAV1	2.1	siCAV1_Area_074	26.2812	90.625	-2.23438	0.3	0.47619	7	1.4	0	1	0
siCAV1	2.5	siCAV1_Area_074	25.3438	87.3922	-0.9375	0.4	0.4	7	1.4	0	1	0
siCAV1	2.8	siCAV1_Area_074	23.4844	80.9806	-1.85938	0.3	0.357143	7	1.4	0	1	0
siCAV1	3.2	siCAV1_Area_074	21.1094	72.7909	-2.375	0.4	0.3125	7	1.4	0	1	0
siCAV1	3.5	siCAV1_Area_074	18.4375	63.5776	-2.67188	0.3	0.285714	7	1.4	0	1	0
siCAV1	3.9	siCAV1_Area_074	15.9375	54.9569	-2.5	0.4	0.25641	7	1.4	0	1	0
siCAV1	4.2	siCAV1_Area_074	14.6562	50.5388	-1.28125	0.3	0.238095	7	1.4	0	1	0
siCAV1	4.6	siCAV1_Area_074	12.375	42.6724	-2.28125	0.4	0.217391	7	1.4	0	1	0
siCAV1	4.9	siCAV1_Area_074	9.9375	34.2672	-2.4375	0.3	0.204082	7	1.4	0	1	0
siCAV1	5.3	siCAV1_Area_074	9.57812	33.028	-0.359375	0.4	0.188679	7	1.4	0	1	0
siCAV1	5.6	siCAV1_Area_074	6.65625	22.9526	-2.92188	0.3	0.178571	7	1.4	0	1	0
siCAV1	6	siCAV1_Area_074	4.9375	17.0259	-1.71875	0.4	0.166667	7	1.4	0	1	0
siCAV1	6.3	siCAV1_Area_074	4.39062	15.1401	-0.546875	0.3	0.15873	7	1.4	0	1	0
siCAV1	6.7	siCAV1_Area_074	0.859375	2.96336	-3.53125	0.4	0.149254	7	1.4	0	1	0
siCAV1	7	siCAV1_Area_074	0	0	-0.859375	0.3	0.142857	7	1.4	0	1	0
siCAV1	0.4	siCAV1_Area_075	0	0			2.5	9.1	1.1	0	1	0
siCAV1	0.7	siCAV1_Area_075	34.7031	93.9907	34.7031	0.3	1.42857	9.1	1.1	0	1	0
siCAV1	1.1	siCAV1_Area_075	36.9219	100	2.21875	0.4	0.909091	9.1	1.1	0	1	0
siCAV1	1.4	siCAV1_Area_075	34.6875	93.9484	-2.23438	0.3	0.714286	9.1	1.1	0	1	0
siCAV1	1.8	siCAV1_Area_075	33.9375	91.9171	-0.75	0.4	0.555556	9.1	1.1	0	1	0
siCAV1	2.1	siCAV1_Area_075	32.8438	88.9547	-1.09375	0.3	0.47619	9.1	1.1	0	1	0
siCAV1	2.5	siCAV1_Area_075	30.8281	83.4956	-2.01562	0.4	0.4	9.1	1.1	0	1	0
siCAV1	2.8	siCAV1_Area_075	28.75	77.8671	-2.07812	0.3	0.357143	9.1	1.1	0	1	0
siCAV1	3.2	siCAV1_Area_075	26.3125	71.2653	-2.4375	0.4	0.3125	9.1	1.1	0	1	0
siCAV1	3.5	siCAV1_Area_075	25.375	68.7262	-0.9375	0.3	0.285714	9.1	1.1	0	1	0
siCAV1	3.9	siCAV1_Area_075	23.4844	63.6056	-1.89062	0.4	0.25641	9.1	1.1	0	1	0
siCAV1	4.2	siCAV1_Area_075	21.0625	57.0461	-2.42188	0.3	0.238095	9.1	1.1	0	1	0
siCAV1	4.6	siCAV1_Area_075	19.5156	52.8565	-1.54688	0.4	0.217391	9.1	1.1	0	1	0
siCAV1	4.9	siCAV1_Area_075	17.9531	48.6246	-1.5625	0.3	0.204082	9.1	1.1	0	1	0
siCAV1	5.3	siCAV1_Area_075	15.6719	42.446	-2.28125	0.4	0.188679	9.1	1.1	0	1	0
siCAV1	5.6	siCAV1_Area_075	12.8906	34.9132	-2.78125	0.3	0.178571	9.1	1.1	0	1	0
siCAV1	6	siCAV1_Area_075	10.75	29.1155	-2.14062	0.4	0.166667	9.1	1.1	0	1	0
siCAV1	6.3	siCAV1_Area_075	9.60938	26.0262	-1.14062	0.3	0.15873	9.1	1.1	0	1	0
siCAV1	6.7	siCAV1_Area_075	7.1875	19.4668	-2.42188	0.4	0.149254	9.1	1.1	0	1	0
siCAV1	7	siCAV1_Area_075	5.07812	13.7537	-2.10938	0.3	0.142857	9.1	1.1	0	1	0
siCAV1	7.4	siCAV1_Area_075	3.82812	10.3682	-1.25	0.4	0.135135	9.1	1.1	0	1	0
siCAV1	7.7	siCAV1_Area_075	2.84375	7.70207	-0.984375	0.3	0.12987	9.1	1.1	0	1	0
siCAV1	8.1	siCAV1_Area_075	2.5	6.77105	-0.34375	0.4	0.123457	9.1	1.1	0	1	0
siCAV1	8.4	siCAV1_Area_075	2.5625	6.94033	0.0625	0.3	0.119048	9.1	1.1	0	1	0
siCAV1	8.8	siCAV1_Area_075	1.21875	3.30089	-1.34375	0.4	0.113636	9.1	1.1	0	1	0
siCAV1	9.1	siCAV1_Area_075	0	0	-1.21875	0.3	0.10989	9.1	1.1	0	1	0
siCAV1	0.4	siCAV1_Area_076	0	0			2.5	5.6	0.7	0	1	0
siCAV1	0.7	siCAV1_Area_076	27.0625	100	27.0625	0.3	1.42857	5.6	0.7	0	1	0
siCAV1	1.1	siCAV1_Area_076	26.25	96.9977	-0.8125	0.4	0.909091	5.6	0.7	0	1	0
siCAV1	1.4	siCAV1_Area_076	25.4062	93.8799	-0.84375	0.3	0.714286	5.6	0.7	0	1	0
siCAV1	1.8	siCAV1_Area_076	23.0312	85.1039	-2.375	0.4	0.555556	5.6	0.7	0	1	0
siCAV1	2.1	siCAV1_Area_076	18.0469	66.6859	-4.98438	0.3	0.47619	5.6	0.7	0	1	0
siCAV1	2.5	siCAV1_Area_076	15.3125	56.582	-2.73438	0.4	0.4	5.6	0.7	0	1	0
siCAV1	2.8	siCAV1_Area_076	12.9844	47.9792	-2.32812	0.3	0.357143	5.6	0.7	0	1	0
siCAV1	3.2	siCAV1_Area_076	10.7812	39.8383	-2.20312	0.4	0.3125	5.6	0.7	0	1	0
siCAV1	3.5	siCAV1_Area_076	9.71875	35.9122	-1.0625	0.3	0.285714	5.6	0.7	0	1	0
siCAV1	3.9	siCAV1_Area_076	8.4375	31.1778	-1.28125	0.4	0.25641	5.6	0.7	0	1	0
siCAV1	4.2	siCAV1_Area_076	7.59375	28.06	-0.84375	0.3	0.238095	5.6	0.7	0	1	0
siCAV1	4.6	siCAV1_Area_076	8.35938	30.8891	0.765625	0.4	0.217391	5.6	0.7	0	1	0
siCAV1	4.9	siCAV1_Area_076	3.21875	11.8938	-5.14062	0.3	0.204082	5.6	0.7	0	1	0
siCAV1	5.3	siCAV1_Area_076	2.64062	9.75751	-0.578125	0.4	0.188679	5.6	0.7	0	1	0
siCAV1	5.6	siCAV1_Area_076	0	0	-2.64062	0.3	0.178571	5.6	0.7	0	1	0
siCAV1	0.4	siCAV1_Area_077	0	0			2.5	17.5	3.9	0	1	0
siCAV1	1.8	siCAV1_Area_077	120.453	96.3986	120.453	1.4	0.555556	17.5	3.9	0	1	0
siCAV1	2.1	siCAV1_Area_077	122.984	98.4244	2.53125	0.3	0.47619	17.5	3.9	0	1	0
siCAV1	2.5	siCAV1_Area_077	124.312	99.4873	1.32812	0.4	0.4	17.5	3.9	0	1	0
siCAV1	2.8	siCAV1_Area_077	124.562	99.6874	0.25	0.3	0.357143	17.5	3.9	0	1	0
siCAV1	3.2	siCAV1_Area_077	124.688	99.7874	0.125	0.4	0.3125	17.5	3.9	0	1	0
siCAV1	3.5	siCAV1_Area_077	124.234	99.4248	-0.453125	0.3	0.285714	17.5	3.9	0	1	0
siCAV1	3.9	siCAV1_Area_077	124.953	100	0.71875	0.4	0.25641	17.5	3.9	0	1	0
siCAV1	4.2	siCAV1_Area_077	123.688	98.9871	-1.26562	0.3	0.238095	17.5	3.9	0	1	0
siCAV1	4.6	siCAV1_Area_077	121.234	97.0239	-2.45312	0.4	0.217391	17.5	3.9	0	1	0
siCAV1	4.9	siCAV1_Area_077	122.188	97.7867	0.953125	0.3	0.204082	17.5	3.9	0	1	0
siCAV1	5.3	siCAV1_Area_077	119.906	95.961	-2.28125	0.4	0.188679	17.5	3.9	0	1	0
siCAV1	5.6	siCAV1_Area_077	119.812	95.886	-0.09375	0.3	0.178571	17.5	3.9	0	1	0
siCAV1	6	siCAV1_Area_077	119.438	95.5858	-0.375	0.4	0.166667	17.5	3.9	0	1	0
siCAV1	6.3	siCAV1_Area_077	117.375	93.9352	-2.0625	0.3	0.15873	17.5	3.9	0	1	0
siCAV1	6.7	siCAV1_Area_077	113.172	90.5715	-4.20312	0.4	0.149254	17.5	3.9	0	1	0
siCAV1	7	siCAV1_Area_077	107.719	86.2073	-5.45312	0.3	0.142857	17.5	3.9	0	1	0
siCAV1	7.4	siCAV1_Area_077	102.203	81.7932	-5.51562	0.4	0.135135	17.5	3.9	0	1	0
siCAV1	7.7	siCAV1_Area_077	95.0625	76.0785	-7.14062	0.3	0.12987	17.5	3.9	0	1	0
siCAV1	8.1	siCAV1_Area_077	90.2344	72.2146	-4.82812	0.4	0.123457	17.5	3.9	0	1	0
siCAV1	8.4	siCAV1_Area_077	86.4219	69.1634	-3.8125	0.3	0.119048	17.5	3.9	0	1	0
siCAV1	8.8	siCAV1_Area_077	78.3906	62.736	-8.03125	0.4	0.113636	17.5	3.9	0	1	0
siCAV1	9.1	siCAV1_Area_077	72.9531	58.3844	-5.4375	0.3	0.10989	17.5	3.9	0	1	0
siCAV1	9.5	siCAV1_Area_077	64.125	51.3192	-8.82812	0.4	0.105263	17.5	3.9	0	1	0
siCAV1	9.8	siCAV1_Area_077	55.4219	44.3541	-8.70312	0.3	0.102041	17.5	3.9	0	1	0
siCAV1	10.2	siCAV1_Area_077	50.6406	40.5277	-4.78125	0.4	0.0980392	17.5	3.9	0	1	0
siCAV1	10.5	siCAV1_Area_077	45.6094	36.5012	-5.03125	0.3	0.0952381	17.5	3.9	0	1	0
siCAV1	10.9	siCAV1_Area_077	40.9062	32.7373	-4.70312	0.4	0.0917431	17.5	3.9	0	1	0
siCAV1	11.2	siCAV1_Area_077	36.1719	28.9484	-4.73438	0.3	0.0892857	17.5	3.9	0	1	0
siCAV1	11.6	siCAV1_Area_077	32.3594	25.8972	-3.8125	0.4	0.0862069	17.5	3.9	0	1	0
siCAV1	11.9	siCAV1_Area_077	28.0938	22.4834	-4.26562	0.3	0.0840336	17.5	3.9	0	1	0
siCAV1	12.3	siCAV1_Area_077	24.3594	19.4948	-3.73438	0.4	0.0813008	17.5	3.9	0	1	0
siCAV1	12.6	siCAV1_Area_077	20.9531	16.7688	-3.40625	0.3	0.0793651	17.5	3.9	0	1	0
siCAV1	13	siCAV1_Area_077	17.5781	14.0678	-3.375	0.4	0.0769231	17.5	3.9	0	1	0
siCAV1	13.3	siCAV1_Area_077	15.1719	12.1421	-2.40625	0.3	0.075188	17.5	3.9	0	1	0
siCAV1	13.7	siCAV1_Area_077	13.1875	10.554	-1.98438	0.4	0.0729927	17.5	3.9	0	1	0
siCAV1	14	siCAV1_Area_077	10.3594	8.29061	-2.82812	0.3	0.0714286	17.5	3.9	0	1	0
siCAV1	14.4	siCAV1_Area_077	8.6875	6.95261	-1.67188	0.4	0.0694444	17.5	3.9	0	1	0
siCAV1	14.7	siCAV1_Area_077	8.17188	6.53995	-0.515625	0.3	0.0680272	17.5	3.9	0	1	0
siCAV1	15.1	siCAV1_Area_077	7.01562	5.61461	-1.15625	0.4	0.0662252	17.5	3.9	0	1	0
siCAV1	15.4	siCAV1_Area_077	5.375	4.30161	-1.64062	0.3	0.0649351	17.5	3.9	0	1	0
siCAV1	15.8	siCAV1_Area_077	5.375	4.30161	0	0.4	0.0632911	17.5	3.9	0	1	0
siCAV1	16.1	siCAV1_Area_077	4.20312	3.36376	-1.17188	0.3	0.0621118	17.5	3.9	0	1	0
siCAV1	16.5	siCAV1_Area_077	4.09375	3.27623	-0.109375	0.4	0.0606061	17.5	3.9	0	1	0
siCAV1	16.8	siCAV1_Area_077	2.46875	1.97574	-1.625	0.3	0.0595238	17.5	3.9	0	1	0
siCAV1	17.2	siCAV1_Area_077	1.03125	0.825309	-1.4375	0.4	0.0581395	17.5	3.9	0	1	0
siCAV1	17.5	siCAV1_Area_077	0	0	-1.03125	0.3	0.0571429	17.5	3.9	0	1	0
siCAV1	0.4	siCAV1_Area_078	0	0			2.5	9.1	1.1	0	1	0
siCAV1	0.7	siCAV1_Area_078	38.0469	97.4	38.0469	0.3	1.42857	9.1	1.1	0	1	0
siCAV1	1.1	siCAV1_Area_078	39.0625	100	1.01562	0.4	0.909091	9.1	1.1	0	1	0
siCAV1	1.4	siCAV1_Area_078	36.3594	93.08	-2.70312	0.3	0.714286	9.1	1.1	0	1	0
siCAV1	1.8	siCAV1_Area_078	35.7812	91.6	-0.578125	0.4	0.555556	9.1	1.1	0	1	0
siCAV1	2.1	siCAV1_Area_078	34.6719	88.76	-1.10938	0.3	0.47619	9.1	1.1	0	1	0
siCAV1	2.5	siCAV1_Area_078	33	84.48	-1.67188	0.4	0.4	9.1	1.1	0	1	0
siCAV1	2.8	siCAV1_Area_078	30.2812	77.52	-2.71875	0.3	0.357143	9.1	1.1	0	1	0
siCAV1	3.2	siCAV1_Area_078	27.4219	70.2	-2.85938	0.4	0.3125	9.1	1.1	0	1	0
siCAV1	3.5	siCAV1_Area_078	23.4844	60.12	-3.9375	0.3	0.285714	9.1	1.1	0	1	0
siCAV1	3.9	siCAV1_Area_078	20.7031	53	-2.78125	0.4	0.25641	9.1	1.1	0	1	0
siCAV1	4.2	siCAV1_Area_078	17.0156	43.56	-3.6875	0.3	0.238095	9.1	1.1	0	1	0
siCAV1	4.6	siCAV1_Area_078	14.8906	38.12	-2.125	0.4	0.217391	9.1	1.1	0	1	0
siCAV1	4.9	siCAV1_Area_078	12.2188	31.28	-2.67188	0.3	0.204082	9.1	1.1	0	1	0
siCAV1	5.3	siCAV1_Area_078	8.82812	22.6	-3.39062	0.4	0.188679	9.1	1.1	0	1	0
siCAV1	5.6	siCAV1_Area_078	6.79688	17.4	-2.03125	0.3	0.178571	9.1	1.1	0	1	0
siCAV1	6	siCAV1_Area_078	6.34375	16.24	-0.453125	0.4	0.166667	9.1	1.1	0	1	0
siCAV1	6.3	siCAV1_Area_078	5.20312	13.32	-1.14062	0.3	0.15873	9.1	1.1	0	1	0
siCAV1	6.7	siCAV1_Area_078	3.51562	9	-1.6875	0.4	0.149254	9.1	1.1	0	1	0
siCAV1	7	siCAV1_Area_078	3.25	8.32	-0.265625	0.3	0.142857	9.1	1.1	0	1	0
siCAV1	7.4	siCAV1_Area_078	2.625	6.72	-0.625	0.4	0.135135	9.1	1.1	0	1	0
siCAV1	7.7	siCAV1_Area_078	2.53125	6.48	-0.09375	0.3	0.12987	9.1	1.1	0	1	0
siCAV1	8.1	siCAV1_Area_078	2.78125	7.12	0.25	0.4	0.123457	9.1	1.1	0	1	0
siCAV1	8.4	siCAV1_Area_078	1.89062	4.84	-0.890625	0.3	0.119048	9.1	1.1	0	1	0
siCAV1	8.8	siCAV1_Area_078	0.5	1.28	-1.39062	0.4	0.113636	9.1	1.1	0	1	0
siCAV1	9.1	siCAV1_Area_078	0	0	-0.5	0.3	0.10989	9.1	1.1	0	1	0
siCAV1	0.4	siCAV1_Area_079	0	0			2.5	7.4	1.8	0	1	0
siCAV1	1.1	siCAV1_Area_079	13.5938	91.7722	13.5938	0.7	0.909091	7.4	1.8	0	1	0
siCAV1	1.4	siCAV1_Area_079	14.2031	95.8861	0.609375	0.3	0.714286	7.4	1.8	0	1	0
siCAV1	1.8	siCAV1_Area_079	14.8125	100	0.609375	0.4	0.555556	7.4	1.8	0	1	0
siCAV1	2.1	siCAV1_Area_079	13.3906	90.4008	-1.42188	0.3	0.47619	7.4	1.8	0	1	0
siCAV1	2.5	siCAV1_Area_079	12.6719	85.5485	-0.71875	0.4	0.4	7.4	1.8	0	1	0
siCAV1	2.8	siCAV1_Area_079	12.0469	81.3291	-0.625	0.3	0.357143	7.4	1.8	0	1	0
siCAV1	3.2	siCAV1_Area_079	11.6406	78.5865	-0.40625	0.4	0.3125	7.4	1.8	0	1	0
siCAV1	3.5	siCAV1_Area_079	11.6875	78.903	0.046875	0.3	0.285714	7.4	1.8	0	1	0
siCAV1	3.9	siCAV1_Area_079	9.35938	63.1857	-2.32812	0.4	0.25641	7.4	1.8	0	1	0
siCAV1	4.2	siCAV1_Area_079	7.39062	49.8945	-1.96875	0.3	0.238095	7.4	1.8	0	1	0
siCAV1	4.6	siCAV1_Area_079	7.625	51.4768	0.234375	0.4	0.217391	7.4	1.8	0	1	0
siCAV1	4.9	siCAV1_Area_079	6.8125	45.9916	-0.8125	0.3	0.204082	7.4	1.8	0	1	0
siCAV1	5.3	siCAV1_Area_079	6.03125	40.7173	-0.78125	0.4	0.188679	7.4	1.8	0	1	0
siCAV1	5.6	siCAV1_Area_079	5.10938	34.4937	-0.921875	0.3	0.178571	7.4	1.8	0	1	0
siCAV1	6	siCAV1_Area_079	4.15625	28.0591	-0.953125	0.4	0.166667	7.4	1.8	0	1	0
siCAV1	6.3	siCAV1_Area_079	3.5625	24.0506	-0.59375	0.3	0.15873	7.4	1.8	0	1	0
siCAV1	6.7	siCAV1_Area_079	2.5625	17.2996	-1	0.4	0.149254	7.4	1.8	0	1	0
siCAV1	7	siCAV1_Area_079	2.4375	16.4557	-0.125	0.3	0.142857	7.4	1.8	0	1	0
siCAV1	7.4	siCAV1_Area_079	0	0	-2.4375	0.4	0.135135	7.4	1.8	0	1	0
siCAV1	0.4	siCAV1_Area_080	0	0			2.5	10.5	0.7	0	1	0
siCAV1	0.7	siCAV1_Area_080	75.0938	100	75.0938	0.3	1.42857	10.5	0.7	0	1	0
siCAV1	1.1	siCAV1_Area_080	75.0156	99.896	-0.078125	0.4	0.909091	10.5	0.7	0	1	0
siCAV1	1.4	siCAV1_Area_080	74.5469	99.2717	-0.46875	0.3	0.714286	10.5	0.7	0	1	0
siCAV1	1.8	siCAV1_Area_080	72.9531	97.1494	-1.59375	0.4	0.555556	10.5	0.7	0	1	0
siCAV1	2.1	siCAV1_Area_080	70.8438	94.3404	-2.10938	0.3	0.47619	10.5	0.7	0	1	0
siCAV1	2.5	siCAV1_Area_080	68.5469	91.2817	-2.29688	0.4	0.4	10.5	0.7	0	1	0
siCAV1	2.8	siCAV1_Area_080	65.4531	87.1619	-3.09375	0.3	0.357143	10.5	0.7	0	1	0
siCAV1	3.2	siCAV1_Area_080	60.1094	80.0458	-5.34375	0.4	0.3125	10.5	0.7	0	1	0
siCAV1	3.5	siCAV1_Area_080	57.2031	76.1756	-2.90625	0.3	0.285714	10.5	0.7	0	1	0
siCAV1	3.9	siCAV1_Area_080	54.5	72.5759	-2.70312	0.4	0.25641	10.5	0.7	0	1	0
siCAV1	4.2	siCAV1_Area_080	52.2812	69.6213	-2.21875	0.3	0.238095	10.5	0.7	0	1	0
siCAV1	4.6	siCAV1_Area_080	50.1719	66.8123	-2.10938	0.4	0.217391	10.5	0.7	0	1	0
siCAV1	4.9	siCAV1_Area_080	46.2812	61.6313	-3.89062	0.3	0.204082	10.5	0.7	0	1	0
siCAV1	5.3	siCAV1_Area_080	42.6875	56.8456	-3.59375	0.4	0.188679	10.5	0.7	0	1	0
siCAV1	5.6	siCAV1_Area_080	40.7812	54.3071	-1.90625	0.3	0.178571	10.5	0.7	0	1	0
siCAV1	6	siCAV1_Area_080	36.7031	48.8764	-4.07812	0.4	0.166667	10.5	0.7	0	1	0
siCAV1	6.3	siCAV1_Area_080	33.6562	44.819	-3.04688	0.3	0.15873	10.5	0.7	0	1	0
siCAV1	6.7	siCAV1_Area_080	31.5312	41.9892	-2.125	0.4	0.149254	10.5	0.7	0	1	0
siCAV1	7	siCAV1_Area_080	28.9531	38.556	-2.57812	0.3	0.142857	10.5	0.7	0	1	0
siCAV1	7.4	siCAV1_Area_080	25.5312	33.9992	-3.42188	0.4	0.135135	10.5	0.7	0	1	0
siCAV1	7.7	siCAV1_Area_080	21.5781	28.7349	-3.95312	0.3	0.12987	10.5	0.7	0	1	0
siCAV1	8.1	siCAV1_Area_080	18.3281	24.407	-3.25	0.4	0.123457	10.5	0.7	0	1	0
siCAV1	8.4	siCAV1_Area_080	14.5625	19.3924	-3.76562	0.3	0.119048	10.5	0.7	0	1	0
siCAV1	8.8	siCAV1_Area_080	11.25	14.9813	-3.3125	0.4	0.113636	10.5	0.7	0	1	0
siCAV1	9.1	siCAV1_Area_080	8.17188	10.8822	-3.07812	0.3	0.10989	10.5	0.7	0	1	0
siCAV1	9.5	siCAV1_Area_080	5.6875	7.57387	-2.48438	0.4	0.105263	10.5	0.7	0	1	0
siCAV1	9.8	siCAV1_Area_080	3.84375	5.1186	-1.84375	0.3	0.102041	10.5	0.7	0	1	0
siCAV1	10.2	siCAV1_Area_080	1.10938	1.47732	-2.73438	0.4	0.0980392	10.5	0.7	0	1	0
siCAV1	10.5	siCAV1_Area_080	0	0	-1.10938	0.3	0.0952381	10.5	0.7	0	1	0
siCAV1	0.4	siCAV1_Area_081	0	0			2.5	18.2	1.1	0	1	0
siCAV1	1.1	siCAV1_Area_081	44.5781	100	44.5781	0.7	0.909091	18.2	1.1	0	1	0
siCAV1	1.4	siCAV1_Area_081	43.8594	98.3877	-0.71875	0.3	0.714286	18.2	1.1	0	1	0
siCAV1	1.8	siCAV1_Area_081	44.2031	99.1588	0.34375	0.4	0.555556	18.2	1.1	0	1	0
siCAV1	2.1	siCAV1_Area_081	43.9688	98.633	-0.234375	0.3	0.47619	18.2	1.1	0	1	0
siCAV1	2.5	siCAV1_Area_081	44.3281	99.4392	0.359375	0.4	0.4	18.2	1.1	0	1	0
siCAV1	2.8	siCAV1_Area_081	44	98.7031	-0.328125	0.3	0.357143	18.2	1.1	0	1	0
siCAV1	3.2	siCAV1_Area_081	41.5312	93.1651	-2.46875	0.4	0.3125	18.2	1.1	0	1	0
siCAV1	3.5	siCAV1_Area_081	40.1875	90.1507	-1.34375	0.3	0.285714	18.2	1.1	0	1	0
siCAV1	3.9	siCAV1_Area_081	36.5469	81.9839	-3.64062	0.4	0.25641	18.2	1.1	0	1	0
siCAV1	4.2	siCAV1_Area_081	30.0938	67.5079	-6.45312	0.3	0.238095	18.2	1.1	0	1	0
siCAV1	4.6	siCAV1_Area_081	26.9688	60.4977	-3.125	0.4	0.217391	18.2	1.1	0	1	0
siCAV1	4.9	siCAV1_Area_081	23.7344	53.2422	-3.23438	0.3	0.204082	18.2	1.1	0	1	0
siCAV1	5.3	siCAV1_Area_081	22.8125	51.1742	-0.921875	0.4	0.188679	18.2	1.1	0	1	0
siCAV1	5.6	siCAV1_Area_081	20.7344	46.5124	-2.07812	0.3	0.178571	18.2	1.1	0	1	0
siCAV1	6	siCAV1_Area_081	21.7969	48.8959	1.0625	0.4	0.166667	18.2	1.1	0	1	0
siCAV1	6.3	siCAV1_Area_081	20.875	46.8279	-0.921875	0.3	0.15873	18.2	1.1	0	1	0
siCAV1	6.7	siCAV1_Area_081	20.2812	45.496	-0.59375	0.4	0.149254	18.2	1.1	0	1	0
siCAV1	7	siCAV1_Area_081	17.4688	39.1868	-2.8125	0.3	0.142857	18.2	1.1	0	1	0
siCAV1	7.4	siCAV1_Area_081	16.625	37.2941	-0.84375	0.4	0.135135	18.2	1.1	0	1	0
siCAV1	7.7	siCAV1_Area_081	14.9688	33.5787	-1.65625	0.3	0.12987	18.2	1.1	0	1	0
siCAV1	8.1	siCAV1_Area_081	13.3281	29.8984	-1.64062	0.4	0.123457	18.2	1.1	0	1	0
siCAV1	8.4	siCAV1_Area_081	11.5781	25.9727	-1.75	0.3	0.119048	18.2	1.1	0	1	0
siCAV1	8.8	siCAV1_Area_081	10.5156	23.5892	-1.0625	0.4	0.113636	18.2	1.1	0	1	0
siCAV1	9.1	siCAV1_Area_081	9.60938	21.5563	-0.90625	0.3	0.10989	18.2	1.1	0	1	0
siCAV1	9.5	siCAV1_Area_081	10.0312	22.5026	0.421875	0.4	0.105263	18.2	1.1	0	1	0
siCAV1	9.8	siCAV1_Area_081	8.9375	20.0491	-1.09375	0.3	0.102041	18.2	1.1	0	1	0
siCAV1	10.2	siCAV1_Area_081	9.59375	21.5212	0.65625	0.4	0.0980392	18.2	1.1	0	1	0
siCAV1	10.5	siCAV1_Area_081	8.89062	19.9439	-0.703125	0.3	0.0952381	18.2	1.1	0	1	0
siCAV1	10.9	siCAV1_Area_081	8.04688	18.0512	-0.84375	0.4	0.0917431	18.2	1.1	0	1	0
siCAV1	11.2	siCAV1_Area_081	7.67188	17.21	-0.375	0.3	0.0892857	18.2	1.1	0	1	0
siCAV1	11.6	siCAV1_Area_081	6.73438	15.1069	-0.9375	0.4	0.0862069	18.2	1.1	0	1	0
siCAV1	11.9	siCAV1_Area_081	5.25	11.7771	-1.48438	0.3	0.0840336	18.2	1.1	0	1	0
siCAV1	12.3	siCAV1_Area_081	4.95312	11.1111	-0.296875	0.4	0.0813008	18.2	1.1	0	1	0
siCAV1	12.6	siCAV1_Area_081	5.39062	12.0925	0.4375	0.3	0.0793651	18.2	1.1	0	1	0
siCAV1	13	siCAV1_Area_081	5.84375	13.109	0.453125	0.4	0.0769231	18.2	1.1	0	1	0
siCAV1	13.3	siCAV1_Area_081	3.96875	8.90291	-1.875	0.3	0.075188	18.2	1.1	0	1	0
siCAV1	13.7	siCAV1_Area_081	3.5625	7.99159	-0.40625	0.4	0.0729927	18.2	1.1	0	1	0
siCAV1	14	siCAV1_Area_081	3.20312	7.18542	-0.359375	0.3	0.0714286	18.2	1.1	0	1	0
siCAV1	14.4	siCAV1_Area_081	3.09375	6.94006	-0.109375	0.4	0.0694444	18.2	1.1	0	1	0
siCAV1	14.7	siCAV1_Area_081	2.54688	5.71328	-0.546875	0.3	0.0680272	18.2	1.1	0	1	0
siCAV1	15.1	siCAV1_Area_081	2.60938	5.85349	0.0625	0.4	0.0662252	18.2	1.1	0	1	0
siCAV1	15.4	siCAV1_Area_081	2.6875	6.02874	0.078125	0.3	0.0649351	18.2	1.1	0	1	0
siCAV1	15.8	siCAV1_Area_081	2.875	6.44935	0.1875	0.4	0.0632911	18.2	1.1	0	1	0
siCAV1	16.1	siCAV1_Area_081	2.71875	6.09884	-0.15625	0.3	0.0621118	18.2	1.1	0	1	0
siCAV1	16.5	siCAV1_Area_081	2.5625	5.74834	-0.15625	0.4	0.0606061	18.2	1.1	0	1	0
siCAV1	16.8	siCAV1_Area_081	2.76562	6.204	0.203125	0.3	0.0595238	18.2	1.1	0	1	0
siCAV1	17.2	siCAV1_Area_081	3.4375	7.71118	0.671875	0.4	0.0581395	18.2	1.1	0	1	0
siCAV1	17.5	siCAV1_Area_081	3.35938	7.53593	-0.078125	0.3	0.0571429	18.2	1.1	0	1	0
siCAV1	17.9	siCAV1_Area_081	3.82812	8.58745	0.46875	0.4	0.0558659	18.2	1.1	0	1	0
siCAV1	18.2	siCAV1_Area_081	0	0	-3.82812	0.3	0.0549451	18.2	1.1	0	1	0
siCAV1	0.4	siCAV1_Area_082	0	0			2.5	14	1.4	0	1	0
siCAV1	0.7	siCAV1_Area_082	34.2344	92.4863	34.2344	0.3	1.42857	14	1.4	0	1	0
siCAV1	1.1	siCAV1_Area_082	35.1719	95.019	0.9375	0.4	0.909091	14	1.4	0	1	0
siCAV1	1.4	siCAV1_Area_082	37.0156	100	1.84375	0.3	0.714286	14	1.4	0	1	0
siCAV1	1.8	siCAV1_Area_082	36.8438	99.5357	-0.171875	0.4	0.555556	14	1.4	0	1	0
siCAV1	2.1	siCAV1_Area_082	37	99.9578	0.15625	0.3	0.47619	14	1.4	0	1	0
siCAV1	2.5	siCAV1_Area_082	36.1875	97.7628	-0.8125	0.4	0.4	14	1.4	0	1	0
siCAV1	2.8	siCAV1_Area_082	36.0781	97.4673	-0.109375	0.3	0.357143	14	1.4	0	1	0
siCAV1	3.2	siCAV1_Area_082	35.8125	96.7497	-0.265625	0.4	0.3125	14	1.4	0	1	0
siCAV1	3.5	siCAV1_Area_082	35.5	95.9054	-0.3125	0.3	0.285714	14	1.4	0	1	0
siCAV1	3.9	siCAV1_Area_082	34.3906	92.9084	-1.10938	0.4	0.25641	14	1.4	0	1	0
siCAV1	4.2	siCAV1_Area_082	33.5	90.5023	-0.890625	0.3	0.238095	14	1.4	0	1	0
siCAV1	4.6	siCAV1_Area_082	33.875	91.5154	0.375	0.4	0.217391	14	1.4	0	1	0
siCAV1	4.9	siCAV1_Area_082	33.1875	89.6581	-0.6875	0.3	0.204082	14	1.4	0	1	0
siCAV1	5.3	siCAV1_Area_082	32.7969	88.6028	-0.390625	0.4	0.188679	14	1.4	0	1	0
siCAV1	5.6	siCAV1_Area_082	34.1562	92.2752	1.35938	0.3	0.178571	14	1.4	0	1	0
siCAV1	6	siCAV1_Area_082	34.1875	92.3596	0.03125	0.4	0.166667	14	1.4	0	1	0
siCAV1	6.3	siCAV1_Area_082	33.25	89.8269	-0.9375	0.3	0.15873	14	1.4	0	1	0
siCAV1	6.7	siCAV1_Area_082	30.8281	83.2841	-2.42188	0.4	0.149254	14	1.4	0	1	0
siCAV1	7	siCAV1_Area_082	29.7812	80.4559	-1.04688	0.3	0.142857	14	1.4	0	1	0
siCAV1	7.4	siCAV1_Area_082	26.7656	72.309	-3.01562	0.4	0.135135	14	1.4	0	1	0
siCAV1	7.7	siCAV1_Area_082	24.7031	66.737	-2.0625	0.3	0.12987	14	1.4	0	1	0
siCAV1	8.1	siCAV1_Area_082	22.2969	60.2364	-2.40625	0.4	0.123457	14	1.4	0	1	0
siCAV1	8.4	siCAV1_Area_082	20.4844	55.3398	-1.8125	0.3	0.119048	14	1.4	0	1	0
siCAV1	8.8	siCAV1_Area_082	17.9375	48.4593	-2.54688	0.4	0.113636	14	1.4	0	1	0
siCAV1	9.1	siCAV1_Area_082	15.8281	42.7607	-2.10938	0.3	0.10989	14	1.4	0	1	0
siCAV1	9.5	siCAV1_Area_082	14.2031	38.3706	-1.625	0.4	0.105263	14	1.4	0	1	0
siCAV1	9.8	siCAV1_Area_082	12.0938	32.672	-2.10938	0.3	0.102041	14	1.4	0	1	0
siCAV1	10.2	siCAV1_Area_082	10.7969	29.1684	-1.29688	0.4	0.0980392	14	1.4	0	1	0
siCAV1	10.5	siCAV1_Area_082	9.625	26.0025	-1.17188	0.3	0.0952381	14	1.4	0	1	0
siCAV1	10.9	siCAV1_Area_082	9.07812	24.5251	-0.546875	0.4	0.0917431	14	1.4	0	1	0
siCAV1	11.2	siCAV1_Area_082	7.51562	20.3039	-1.5625	0.3	0.0892857	14	1.4	0	1	0
siCAV1	11.6	siCAV1_Area_082	6.9375	18.7421	-0.578125	0.4	0.0862069	14	1.4	0	1	0
siCAV1	11.9	siCAV1_Area_082	5.29688	14.3098	-1.64062	0.3	0.0840336	14	1.4	0	1	0
siCAV1	12.3	siCAV1_Area_082	4.71875	12.748	-0.578125	0.4	0.0813008	14	1.4	0	1	0
siCAV1	12.6	siCAV1_Area_082	5.04688	13.6344	0.328125	0.3	0.0793651	14	1.4	0	1	0
siCAV1	13	siCAV1_Area_082	5.14062	13.8877	0.09375	0.4	0.0769231	14	1.4	0	1	0
siCAV1	13.3	siCAV1_Area_082	3.84375	10.3841	-1.29688	0.3	0.075188	14	1.4	0	1	0
siCAV1	13.7	siCAV1_Area_082	3.28125	8.8645	-0.5625	0.4	0.0729927	14	1.4	0	1	0
siCAV1	14	siCAV1_Area_082	0	0	-3.28125	0.3	0.0714286	14	1.4	0	1	0
siCAV1	0.4	siCAV1_Area_083	0	0			2.5	2.5	0.7	0	1	0
siCAV1	0.7	siCAV1_Area_083	5.25	100	5.25	0.3	1.42857	2.5	0.7	0	1	0
siCAV1	1.1	siCAV1_Area_083	5.14062	97.9167	-0.109375	0.4	0.909091	2.5	0.7	0	1	0
siCAV1	1.4	siCAV1_Area_083	4.96875	94.6429	-0.171875	0.3	0.714286	2.5	0.7	0	1	0
siCAV1	1.8	siCAV1_Area_083	4.35938	83.0357	-0.609375	0.4	0.555556	2.5	0.7	0	1	0
siCAV1	2.1	siCAV1_Area_083	2.64062	50.2976	-1.71875	0.3	0.47619	2.5	0.7	0	1	0
siCAV1	2.5	siCAV1_Area_083	0	0	-2.64062	0.4	0.4	2.5	0.7	0	1	0
siCAV1	0.4	siCAV1_Area_084	0	0			2.5	8.1	1.1	0	1	0
siCAV1	1.1	siCAV1_Area_084	20.1719	100	20.1719	0.7	0.909091	8.1	1.1	0	1	0
siCAV1	1.4	siCAV1_Area_084	17.5312	86.9094	-2.64062	0.3	0.714286	8.1	1.1	0	1	0
siCAV1	1.8	siCAV1_Area_084	14.5312	72.0372	-3	0.4	0.555556	8.1	1.1	0	1	0
siCAV1	2.1	siCAV1_Area_084	10.7969	53.5244	-3.73438	0.3	0.47619	8.1	1.1	0	1	0
siCAV1	2.5	siCAV1_Area_084	6.28125	31.1387	-4.51562	0.4	0.4	8.1	1.1	0	1	0
siCAV1	2.8	siCAV1_Area_084	3.84375	19.055	-2.4375	0.3	0.357143	8.1	1.1	0	1	0
siCAV1	3.2	siCAV1_Area_084	2.09375	10.3796	-1.75	0.4	0.3125	8.1	1.1	0	1	0
siCAV1	3.5	siCAV1_Area_084	1.60938	7.97831	-0.484375	0.3	0.285714	8.1	1.1	0	1	0
siCAV1	3.9	siCAV1_Area_084	0.703125	3.48567	-0.90625	0.4	0.25641	8.1	1.1	0	1	0
siCAV1	8.1	siCAV1_Area_084	0	0	-0.703125	4.2	0.123457	8.1	1.1	0	1	0
siCAV1	0.4	siCAV1_Area_085	0	0			2.5	10.2	2.1	0	1	0
siCAV1	1.1	siCAV1_Area_085	12.8438	98.0907	12.8438	0.7	0.909091	10.2	2.1	0	1	0
siCAV1	1.4	siCAV1_Area_085	12.1719	92.9594	-0.671875	0.3	0.714286	10.2	2.1	0	1	0
siCAV1	1.8	siCAV1_Area_085	13	99.284	0.828125	0.4	0.555556	10.2	2.1	0	1	0
siCAV1	2.1	siCAV1_Area_085	13.0938	100	0.09375	0.3	0.47619	10.2	2.1	0	1	0
siCAV1	2.5	siCAV1_Area_085	12.4688	95.2267	-0.625	0.4	0.4	10.2	2.1	0	1	0
siCAV1	2.8	siCAV1_Area_085	12.7344	97.2554	0.265625	0.3	0.357143	10.2	2.1	0	1	0
siCAV1	3.2	siCAV1_Area_085	11.4375	87.3508	-1.29688	0.4	0.3125	10.2	2.1	0	1	0
siCAV1	3.5	siCAV1_Area_085	10.625	81.1456	-0.8125	0.3	0.285714	10.2	2.1	0	1	0
siCAV1	3.9	siCAV1_Area_085	10.0938	77.0883	-0.53125	0.4	0.25641	10.2	2.1	0	1	0
siCAV1	4.2	siCAV1_Area_085	10	76.3723	-0.09375	0.3	0.238095	10.2	2.1	0	1	0
siCAV1	4.6	siCAV1_Area_085	9.03125	68.9737	-0.96875	0.4	0.217391	10.2	2.1	0	1	0
siCAV1	4.9	siCAV1_Area_085	7.60938	58.1146	-1.42188	0.3	0.204082	10.2	2.1	0	1	0
siCAV1	5.3	siCAV1_Area_085	7	53.4606	-0.609375	0.4	0.188679	10.2	2.1	0	1	0
siCAV1	5.6	siCAV1_Area_085	6.17188	47.136	-0.828125	0.3	0.178571	10.2	2.1	0	1	0
siCAV1	6	siCAV1_Area_085	5.53125	42.2434	-0.640625	0.4	0.166667	10.2	2.1	0	1	0
siCAV1	6.3	siCAV1_Area_085	4.625	35.3222	-0.90625	0.3	0.15873	10.2	2.1	0	1	0
siCAV1	6.7	siCAV1_Area_085	4.15625	31.7422	-0.46875	0.4	0.149254	10.2	2.1	0	1	0
siCAV1	7	siCAV1_Area_085	4.17188	31.8616	0.015625	0.3	0.142857	10.2	2.1	0	1	0
siCAV1	7.4	siCAV1_Area_085	3.23438	24.7017	-0.9375	0.4	0.135135	10.2	2.1	0	1	0
siCAV1	7.7	siCAV1_Area_085	2.8125	21.4797	-0.421875	0.3	0.12987	10.2	2.1	0	1	0
siCAV1	8.1	siCAV1_Area_085	2.65625	20.2864	-0.15625	0.4	0.123457	10.2	2.1	0	1	0
siCAV1	8.4	siCAV1_Area_085	2.14062	16.3484	-0.515625	0.3	0.119048	10.2	2.1	0	1	0
siCAV1	8.8	siCAV1_Area_085	2.26562	17.3031	0.125	0.4	0.113636	10.2	2.1	0	1	0
siCAV1	9.1	siCAV1_Area_085	2.53125	19.3317	0.265625	0.3	0.10989	10.2	2.1	0	1	0
siCAV1	10.2	siCAV1_Area_085	0	0	-2.53125	1.1	0.0980392	10.2	2.1	0	1	0
siCAV1	0.4	siCAV1_Area_086	0	0			2.5	14.4	11.6	0	1	0
siCAV1	1.1	siCAV1_Area_086	1.98438	36.0795	1.98438	0.7	0.909091	14.4	11.6	0	1	0
siCAV1	1.4	siCAV1_Area_086	1.76562	32.1023	-0.21875	0.3	0.714286	14.4	11.6	0	1	0
siCAV1	1.8	siCAV1_Area_086	2.48438	45.1705	0.71875	0.4	0.555556	14.4	11.6	0	1	0
siCAV1	2.1	siCAV1_Area_086	2.84375	51.7045	0.359375	0.3	0.47619	14.4	11.6	0	1	0
siCAV1	2.5	siCAV1_Area_086	2.90625	52.8409	0.0625	0.4	0.4	14.4	11.6	0	1	0
siCAV1	2.8	siCAV1_Area_086	3.21875	58.5227	0.3125	0.3	0.357143	14.4	11.6	0	1	0
siCAV1	3.2	siCAV1_Area_086	2.6875	48.8636	-0.53125	0.4	0.3125	14.4	11.6	0	1	0
siCAV1	3.5	siCAV1_Area_086	3.20312	58.2386	0.515625	0.3	0.285714	14.4	11.6	0	1	0
siCAV1	3.9	siCAV1_Area_086	3.90625	71.0227	0.703125	0.4	0.25641	14.4	11.6	0	1	0
siCAV1	4.2	siCAV1_Area_086	3.71875	67.6136	-0.1875	0.3	0.238095	14.4	11.6	0	1	0
siCAV1	4.6	siCAV1_Area_086	4.07812	74.1477	0.359375	0.4	0.217391	14.4	11.6	0	1	0
siCAV1	4.9	siCAV1_Area_086	4.17188	75.8523	0.09375	0.3	0.204082	14.4	11.6	0	1	0
siCAV1	5.3	siCAV1_Area_086	4	72.7273	-0.171875	0.4	0.188679	14.4	11.6	0	1	0
siCAV1	5.6	siCAV1_Area_086	3.15625	57.3864	-0.84375	0.3	0.178571	14.4	11.6	0	1	0
siCAV1	6	siCAV1_Area_086	3.76562	68.4659	0.609375	0.4	0.166667	14.4	11.6	0	1	0
siCAV1	6.3	siCAV1_Area_086	4.23438	76.9886	0.46875	0.3	0.15873	14.4	11.6	0	1	0
siCAV1	6.7	siCAV1_Area_086	4.29688	78.125	0.0625	0.4	0.149254	14.4	11.6	0	1	0
siCAV1	7	siCAV1_Area_086	4.65625	84.6591	0.359375	0.3	0.142857	14.4	11.6	0	1	0
[truncated: 6,457 more rows]

## Sheet: Figure 4D
Time (s)	siCT	siCT	siCT	siCT	siCT	siCT	siCT	siCT	siCT	siCT	siCT	siCT	siCT	siCT	siCT	siCT	siCT	siCT	siCT	siCT	siCT	siCAV1	siCAV1	siCAV1	siCAV1	siCAV1	siCAV1	siCAV1	siCAV1	siCAV1	siCAV1	siCAV1	siCAV1	siCAV1	siCAV1	siCAV1	siCAV1	siCAV1	siCAV1	siCAV1	siCAV1	siCAV1	siCAV1	siCAV1	siCAV1	siCAV1	siCAV1	siCAV1	siCAV1
0	0	0	0	0	0	0	0	0	0	0	0	0	0	0	0	0	0	0	0	0	0	0	0	0	0	0	0	0	0	0	0	0	0	0	0	0	0	0	0	0	0	0	0	0	0	0	0	0	0
1	10.93	4.2	1.33	1.54	5.4	4.51	3.07	11.66	3.88	5.64	0.52	0.28	0.88	1.27	3.07	0.42	0.89	6.05	3.39	2.53	7.95	4.31	1.44	3.12	3.47	2.09	13.52	50.97	6.81	3.38	6.52	20.14	43.49	20.91	21.19	23.12	17.11	3.92	18.06	9.2	14.62	7.72	1.3	50.44	34.08	42.19	12.5	7.08	18.28
2	21.52	3.9	3.44	1.75	11.13	5.29	3.51	31.41	4.81	81.58	1.38	0.73	0.78	12.17	3.51	1.08	1.44	7.75	3.61	3.16	12.5	6.11	4.28	4.72	6.97	2.36	16.58	66	13.27	4.28	12.98	23.57	53.77	27.16	26.11	35.12	20.16	5.66	21.34	24.11	18.22	10.41	2.8	62.48	45.72	54.38	23.47	24.75	26.44
3	30.53	3.97	4.21	2.15	11.96	12.42	5.18	43.67	5.2	101.08	3.8	0.81	2.52	12.59	5.18	1.33	1.64	12.88	3.92	3.91	14.94	5.72	6.75	4.91	8.82	2.92	17.05	71.98	16.95	4.38	18.06	25.6	57.23	30.02	28.41	37.94	30.45	9.23	22.7	30.59	20.8	11.88	6.22	80.83	59	62.56	26.16	29.44	30.12
4	39.08	4.64	4.64	3.21	13.09	16.31	4.57	51.73	6.09	103.42	5.72	1.05	3.91	14.22	4.57	1.2	1.88	13.78	3.77	4.05	18.27	6.27	7.41	4.66	8.88	8.7	17.48	75.59	20.02	6.42	24.41	31.24	60.76	35.31	35.03	54.41	36.47	12.72	24.19	35.09	22.36	17.5	5.39	83.98	71.92	67.44	27.86	33.88	30.47
5	47.06	4.46	5.32	2.97	12.85	17.86	4.86	54.67	6.22	104.45	7.55	1.73	3.22	15.64	4.86	1.33	1.42	15.08	4.14	3.81	18.58	7.09	8.17	4.98	8.65	10.44	16.5	81.87	19.53	8.33	28	32.69	67	34.45	35.17	60.48	39.69	17.48	24.41	32.95	22.91	16.56	7.19	92.8	76.52	71.94	28.66	40.7	32.27
6	51.59	4.93	5.63	3.43	13.32	18.5	4.2	61.83	6.33	113.75	7.03	2.62	3.52	16.86	4.2	2.14	1.48	15.95	4.11	4.28	19.67	7.14	7.95	5.56	9.27	12.81	17.36	86.83	18.8	9	28.78	34.41	69.13	35.66	33.45	81.27	44.53	20.55	25.42	35.52	21.59	18.02	6.36	96.8	86.39	74.53	27.92	43.64	35.41
7	59.16	4.82	5.17	3.54	12.74	18.47	4.06	63.92	7.27	111.47	9.38	4.31	3.83	17.69	4.06	2.69	2	16.86	4.86	4.25	19.64	7.11	8.12	5.44	9.74	14.67	17.41	87.96	20.05	9.84	33.98	32.5	73.89	38.12	34.62	91.12	45.77	22.64	25.05	34.69	23.06	19.2	8.09	99.28	90.41	80.58	28.28	45.28	36.8
8	64.01	5.14	5.17	3.57	13.39	17.03	4.5	69.36	7.33	112.34	9.25	5.81	4.06	17.19	4.5	2.62	1.83	16.81	4.7	4.22	21.03	7.61	8.14	6.33	9.5	15.84	16.75	89.76	21.8	9.84	36.09	35.1	74.55	37.58	37.81	91.8	46.84	24	25.66	37.52	22.97	20.52	7.94	101.92	91.47	81.47	29.38	44.62	34.86
9	64.88	5.13	4.9	3.39	13.6	18.41	4.5	72.41	6.67	116.06	10.39	8.92	4.59	17.64	4.5	3	1.77	17.95	5.17	4.59	21.77	7.62	9.17	7.64	9.02	17.28	17.97	115.56	21.97	10.16	40.19	36.16	78.03	40.25	36.39	102.67	50.77	23.58	26.86	35.8	25.91	19.5	8.88	102.94	94.5	83.44	29.8	48.92	36.53
10	66.02	4.97	4.81	4.06	12.71	17.03	4.18	72.98	7.44	117.62	10.16	10.48	4.81	18.61	4.18	3.25	1.7	17.22	5.56	4.36	21.3	8.45	9.69	7.27	10.45	21.64	17.81	135.85	24.22	10.5	38.58	37.66	81.05	43.05	31.72	101.48	51.78	24.5	26.36	37.14	26.08	20.81	7.73	104.19	96.22	87.12	30.53	49.89	37.22
12	69.05	5	4.74	3.58	13.43	17.39	4.65	75.88	7.27	121.42	11.28	11.36	4.83	18.45	4.65	2.75	2.44	18.14	5.53	4.98	21.83	8.98	10.44	6.75	11.89	25.31	18.55	152.04	28.52	10.86	36.14	40.33	87.01	43.53	36	111.73	53.55	26.88	25.84	38.22	30.11	19.98	10.06	108.16	102.42	95.8	30.55	53.38	38.75
14	71.89	5.53	4.63	3.71	13.82	16.67	4.58	85.45	6.55	122.06	10.89	14.72	4.58	18.42	4.58	3.36	1.92	18.17	6.27	4.72	23.05	8.73	10.02	7.02	11.64	25.55	19.95	162.66	29.27	21.88	35.23	38.31	90.99	42.66	35.77	122.28	52.47	27.84	25.62	37.77	30.77	20.25	9.39	113.06	102.38	100.12	31.66	55.8	39.45
16	72.12	5.06	4.26	3.79	13.2	16.07	4.13	92.44	6.98	125.08	10.05	15.56	4.27	18.36	4.13	2.69	2.38	18.33	5.41	4.62	22.31	9.41	9.98	7.48	12.1	26.66	21.47	173.62	29.08	25.69	36.25	39.85	98.21	43.64	36.75	133.78	56.7	29.56	25.78	41.95	30.25	19.94	9.73	113.02	102.89	108.88	32.53	59.47	43.02
18	74.83	5.38	4.18	4.08	13.45	15.5	3.53	95.64	8.02	131.83	10.34	16.34	4.56	18.53	3.53	2.83	2.14	18.84	6.05	4.8	22.56	9.23	10.23	7.52	11.2	27.08	22.59	179.46	32	25.98	37.48	41.02	102.97	42.48	40.34	139.97	55.34	30.36	24.62	43.27	31.72	19.8	13.73	110.02	103.23	116.38	31.91	62.86	43.89
20	80.64	5.32	4.39	3.47	13.31	15.4	3.78	101.45	8.05	134.53	10.05	16.75	5.48	18.41	3.78	2.58	2.14	17.23	6.33	4.53	22.34	9.55	10.23	7.09	10.71	26.64	22.91	188.29	31.95	25.64	36.89	40.85	111.32	44.5	42.86	143.95	54.41	31.47	23.61	42.88	31.06	19.97	14.91	113.19	107.7	116.33	33.23	63.52	44.83
22	81.48	5.71	3.95	3.15	13.17	14.9	3.5	106.05	8.33	139.84	9.55	16.55	6.23	18.95	3.5	2.77	2.69	17.58	6.5	4.66	23.14	8.7	11.34	6.36	11.29	27	22.42	188.82	32.23	29.03	39.83	41.88	111.07	45.61	38.03	144.84	57.73	32.33	25.5	44.52	33.47	18.48	16.95	113.94	109.58	124.53	33.16	64	53.23
24	86.23	5.7	3.89	3.63	12.54	14.9	3.5	107.23	8.27	140.38	10.03	15.97	6.52	19.38	3.5	2.8	2.48	19.28	6.22	5	21.97	8.8	11.17	7.02	12.06	26.16	23.11	207.24	34.2	27.83	40.2	43.63	115.34	44.22	37.72	144.31	57.47	32.53	24.27	44.61	32.94	19.47	16.69	115.64	109.09	125.09	32.47	69.2	54.83
26	87.03	5.67	4.01	3.36	13.28	15.75	3.4	107.83	7.38	144.59	10.81	17.2	8.12	21.36	3.4	2.77	2.45	18.28	6.25	4.86	23.67	8.61	11.05	7.06	11.92	25.06	23.38	207.79	34.92	29.44	42.44	43.74	115.96	44.95	39.39	146.78	56.22	32.06	24.91	45.19	32.75	19.55	17.88	116.83	107.22	124.58	32.52	67.92	57.41
28	89.32	5.56	3.82	3.32	13.28	15.75	3.1	111.08	7.59	153.95	10.69	15.45	7.27	21.55	3.1	3.05	2.75	18.12	6.72	4.58	23.03	8.45	10.77	6.34	12.03	25.47	22.95	209.74	35.53	29	41.52	42.48	122.14	44.95	39.56	144.41	58.73	33.41	25.23	48.78	32.77	18.22	23.48	116.17	107.95	129.84	31.64	70.22	62.27
30	88.44	5.67	4.04	2.85	12.6	15.46	2.71	112.3	7.91	152.59	11.27	16.02	7.69	22.33	2.71	3.48	2.75	18.95	6.64	4.64	23.92	8.73	10.94	7	11.9	25.16	22.55	211.72	37.12	29.19	39.55	41.85	122.85	48.7	40.08	147.2	57.73	30.75	25.67	51.25	32.56	17.95	26.06	117.05	107.2	129.03	33.36	69.5	63.19
35	90.85	5.65	4.9	3.36	12.54	15.46	3.17	112.17	8.08	157.25	10.31	16.5	7.36	23.92	3.17	2.77	2.88	19.08	6.95	4.86	23.61	8.44	10.58	6.53	11.99	24.78	22.05	225.17	37.53	29.75	37	39.95	125.56	44.61	39.09	147.8	59.42	31.2	26.36	56.23	31.36	18.22	27.77	119.89	100.06	137.62	32.52	72.08	73.27
40	94.07	5.56	5.35	3.56	11.97	14.63	3.56	114.28	7.25	165.09	9.2	16.5	7.44	23.73	3.56	3.55	3.53	18.22	6.97	5.09	24.22	8.95	10.72	5.08	11.89	24.22	22.94	230.13	36.86	31.88	31.89	37.55	121.7	48.78	39.17	152.33	59.84	30.75	26.14	58.62	29.81	17.03	34.72	115.11	98.19	140.72	32.33	73.44	73.2
45	92.74	5.72	5.18	3.43	11.43	13.07	3.65	117.06	8.08	168.06	8.25	15.95	7.67	22.7	3.65	2.95	3.2	19.12	7.31	4.84	24.64	7.92	10.88	5.16	11.88	23.64	21.77	230.12	36.77	31.59	30.91	34.91	126.99	45.58	39.42	152.45	57.84	31.25	27.53	56.95	28.09	16.89	35.5	115.98	92.3	136.23	32.86	73.55	74.25
50	93.37	5.93	4.31	3.81	11.68	12	2.96	116.48	7.3	173.08	6.75	13.89	7.55	23.81	2.96	3.27	3.64	18.95	7.39	4.98	24.94	7.16	11.64	4.83	13.09	24.14	20.56	234.76	34.88	31.84	29.47	34.37	127	48.7	37.95	150.09	57.36	32.17	27.28	58.27	28.22	15.89	38.31	116.31	88.34	139.11	33.64	75.19	76.17
[truncated: 30 more columns]
