# Supplementary material for: Caveolin-1 protects endothelial cells from extensive expansion of transcellular tunnel by stiffening the plasma membrane
Source: eLife. 2024 Mar 22;12:RP92078. doi: 10.7554/eLife.92078 (PMC10959525; doi:10.7554/eLife.92078)
Supplement: Figure 5—figure supplement 1—source data 1. [file elife-92078-fig5-figsupp1-data1.xlsx]

## Sheet: 5x10e6 CFU per m
Days elapsed	WT edin	Δ edin
6	1
7	0
7	0
7	0
7	0
7		0
7		0
7		0
7		0
7		0

## Sheet: 10e7 CFU per m
Days elapsed	WT edin	Δ edin
3	1
7	0
7	0
7	0
7	0
7	0
7		0
7		0
7		0
7		0
7		0
7		0

## Sheet: 5x10e7 CFU per m
Days elapsed	WT edin	Δ edin
1	1
1	1
2	1
2	1
2	1
3	1
1		1
2		1
2		1
2		1
2		1
2		1
3		1

## Sheet: 5x10e8 CFU per m
Days elapsed	WT edin	Δ edin
1	1
1	1
1	1
1	1
1	1
1		1
1		1
1		1
1		1
1		1
