# Supplementary material for: Caveolin-1 protects endothelial cells from extensive expansion of transcellular tunnel by stiffening the plasma membrane
Source: eLife. 2024 Mar 22;12:RP92078. doi: 10.7554/eLife.92078 (PMC10959525; doi:10.7554/eLife.92078)
Supplement: Figure 5—source data 1. [file elife-92078-fig5-data1.xlsx]

## Sheet: Figure 5A-left
5x10e6 CFU/m
Days elapsed	CAV1 +/+	CAV1 -/-
7	0
7	0
7	0
7	0
7	0
7	0
7	0
7	0
7	0
7	0
7		1
7		0
7		0
7		0
7		0
7		0
7		0
7		0
7		0

## Sheet: Figure 5A-center 
5x10e7 CFU/m
Days elapsed	CAV1 +/+	CAV1 -/-
2	1
2	1
9	0
1	1
2	1
2	1
3	1
1		1
1		1
1		1
1		1
1		1
1		1
1		1
1		1

## Sheet: Figure 5A-right
5x10e8 CFU/m
Days elapsed	CAV1 +/+	CAV1 -/-
1	1
1	1
1	1
1	1
1	1
1	1
1	1
1		1
1		1
1		1
1		1
1		1
1		1
1		1
1		1
1		1

## Sheet: Figure 5B
Cav1+/+	2.5x10e7 CFU/m
Days elapsed	WT edin	Δ edin
1	1
2	1
7	1
7	1
7	0
7	0
3		1
3		1
7		1
7		0
7		0
7		0

## Sheet: Figure 5C
Cav1 -/-	2.5x10e7 CFU/m
Days elapsed	WT edin	Δ edin
1	1
1	1
1	1
1	1
2	1
7	0
1		1
3		1
7		0
7		0
7		0
7		0
1	1
1	1
1	1
1	1
2	1
2	1
3	1
3	1
7	0
7	0
7	0
1		1
1		1
2		1
7		1
7		1
7		0
7		0
7		0
7		0
7		0
7		0
7		0

## Sheet: Figure 5D
Cav1 -/-	2.5x10e7 CFU/m
Days elapsed	Δ edin pEDIN-B	Δ edin pEDIN-B RE
1	1
1	1
1	1
1	1
2	1
2	1
2	1
3	1
3	1
6	1
6	1
1		1
2		1
3		1
3		1
6		1
6		1
6		0
6		0
6		0
6		0
2	1
2	1
3	1
6	1
6	0
6	0
6	0
6	0
6	0
2		1
6		0
6		0
6		0
6		0
6		0
6		0
6		0
6		0
6		0
