# Supplementary material for: Caveolin-1 protects endothelial cells from extensive expansion of transcellular tunnel by stiffening the plasma membrane
Source: eLife. 2024 Mar 22;12:RP92078. doi: 10.7554/eLife.92078 (PMC10959525; doi:10.7554/eLife.92078)
Supplement: Figure 6—figure supplement 1—source data 1. [file elife-92078-fig6-figsupp1-data1.xlsx]

## Sheet: Data 1
time (sec)	force
0	34.4896
0.025	34.2825
0.05	33.8517
0.075	33.5017
0.1	33.8838
0.125	33.6448
0.15	34.2527
0.175	34.4723
0.2	34.1384
0.225	33.8951
0.25	34.2909
0.275	33.5474
0.3	34.4931
0.325	33.4653
0.35	33.6
0.375	33.1477
0.4	33.0538
0.425	33.156
0.45	32.8476
0.475	32.7121
0.5	32.8625
0.525	32.8716
0.55	32.6293
0.575	32.9756
0.6	32.5913
0.625	32.7044
0.65	32.5644
0.675	32.4928
0.7	33.1672
0.725	33.2028
0.75	32.9983
0.775	33.592
0.8	33.4364
0.825	32.871
0.85	33.2336
0.875	33.0451
0.9	33.3589
0.925	33.2406
0.95	32.9607
0.975	33.15
1	32.4641
1.025	32.8213
1.05	32.4779
1.075	32.9163
1.1	33.2657
1.125	33.0974
1.15	33.3065
1.175	33.6001
1.2	33.3295
1.225	33.2846
1.25	33.277
1.275	33.1456
1.3	33.2143
1.325	33.6307
1.35	33.66
1.375	33.2089
1.4	33.4968
1.425	33.0337
1.45	33.404
1.475	33.1522
1.5	33.9597
1.525	34.237
1.55	34.3645
1.575	34.0171
1.6	34.4336
1.625	33.9643
1.65	34.0863
1.675	33.8637
1.7	34.1321
1.725	33.8928
1.75	33.6128
1.775	33.5531
1.8	33.2917
1.825	32.6219
1.85	33.6588
1.875	33.6814
1.9	33.4068
1.925	33.938
1.95	34.9357
1.975	34.4054
2	34.5921
2.025	34.0539
2.05	34.5781
2.075	34.3072
2.1	34.2965
2.125	34.0469
2.15	34.1405
2.175	34.5643
2.2	34.7426
2.225	34.568
2.25	34.8607
2.275	34.5774
2.3	33.9337
2.325	32.9264
2.35	34.1637
2.375	34.4738
2.4	34.6531
2.425	34.0654
2.45	33.7242
2.475	34.1074
2.5	33.4946
2.525	34.498
2.55	34.2998
2.575	34.2987
2.6	34.1726
2.625	34.0214
2.65	34.3017
2.675	34.471
2.7	34.1352
2.725	34.3966
2.75	34.3622
2.775	34.3146
2.8	34.9327
2.825	34.8203
2.85	34.3058
2.875	33.572
2.9	34.6798
2.925	34.7359
2.95	34.4369
2.975	34.5564
3	34.0376
3.025	33.9009
3.05	35.106
3.075	34.0944
3.1	34.9194
3.125	34.3064
3.15	33.7743
3.175	33.8258
3.2	33.8422
3.225	34.0708
3.25	34.8292
3.275	34.2556
3.3	34.4747
3.325	33.9855
3.35	34.3082
3.375	34.7128
3.4	35.2735
3.425	35.1123
3.45	34.41
3.475	34.3263
3.5	34.2419
3.525	34.6713
3.55	35.664
3.575	40.61
3.6	44.4312
3.625	44.2527
3.65	45.0633
3.675	46.5787
3.7	47.2032
3.725	47.0892
3.75	47.4192
3.775	47.6503
3.8	49.8949
3.825	51.6994
3.85	53.5898
3.875	54.7593
3.9	56.41
3.925	58.4159
3.95	59.5689
3.975	60.5369
4	61.8689
4.025	63.3361
4.05	66.0135
4.075	69.7489
4.1	71.2064
4.125	71.1833
4.15	70.7763
4.175	69.8666
4.2	69.2169
4.225	69.6596
4.25	70.1636
4.275	70.8978
4.3	71.4751
4.325	70.6921
4.35	71.0384
4.375	70.6069
4.4	70.0116
4.425	69.1684
4.45	68.6132
4.475	68.8105
4.5	68.8001
4.525	68.6938
4.55	68.966
4.575	69.1055
4.6	69.7043
4.625	69.5924
4.65	69.9327
4.675	70.1018
4.7	70.3894
4.725	70.5052
4.75	69.2354
4.775	69.7027
4.8	69.8657
4.825	70.3619
4.85	72.0332
4.875	72.3539
4.9	73.6794
4.925	72.9132
4.95	72.9181
4.975	73.5041
5	72.383
5.025	70.6053
5.05	70.309
5.075	71.1993
5.1	71.6321
5.125	71.3822
5.15	70.692
5.175	70.3039
5.2	71.5993
5.225	71.0628
5.25	70.2993
5.275	69.7549
5.3	70.5851
5.325	71.4181
5.35	71.1721
5.375	70.3889
5.4	69.1778
5.425	68.9196
5.45	69.1134
5.475	68.5805
5.5	68.6952
5.525	68.4665
5.55	68.6122
5.575	68.7922
5.6	68.7474
5.625	68.1678
5.65	67.4395
5.675	68.8392
5.7	70.6755
5.725	71.7936
5.75	71.0672
5.775	70.8443
5.8	69.9885
5.825	69.5917
5.85	69.2622
5.875	68.5623
5.9	67.7752
5.925	67.2731
5.95	66.7064
5.975	66.7582
6	65.8662
6.025	65.3827
6.05	65.0239
6.075	64.1282
6.1	63.6826
6.125	63.3054
6.15	63.2005
6.175	63.0429
6.2	62.7751
6.225	62.7387
6.25	62.4975
6.275	61.9251
6.3	61.5504
6.325	60.7318
6.35	60.1371
6.375	59.3563
6.4	59.1914
6.425	59.1447
6.45	58.7671
6.475	58.169
6.5	57.978
6.525	57.8958
6.55	57.8862
6.575	57.2554
6.6	57.2968
6.625	56.7782
6.65	56.4077
6.675	56.5451
6.7	55.2473
6.725	55.2456
6.75	55.1979
6.775	54.6823
6.8	54.9933
6.825	54.4624
6.85	54.2473
6.875	54.4815
6.9	54.8008
6.925	54.3075
6.95	53.7562
6.975	54.2372
7	54.2179
7.025	53.6364
7.05	53.4127
7.075	53.5988
7.1	53.6131
7.125	53.7441
7.15	53.2942
7.175	52.7887
7.2	53.5128
7.225	52.9883
7.25	52.645
7.275	52.3297
7.3	52.4295
7.325	51.9563
7.35	51.978
7.375	51.7295
7.4	51.5412
7.425	50.8896
7.45	51.0963
7.475	51.2266
7.5	50.9567
7.525	51.0016
7.55	50.5032
7.575	50.2814
7.6	50.2777
7.625	50.0355
7.65	49.6375
7.675	50.5064
7.7	50.0086
7.725	49.8221
7.75	49.5384
7.775	49.3018
7.8	49.5346
7.825	49.8456
7.85	50.084
7.875	49.6457
7.9	49.4797
7.925	49.406
7.95	49.9043
7.975	48.991
8	49.5749
8.025	49.7083
8.05	49.7596
8.075	49.3644
8.1	49.7914
8.125	49.6551
8.15	48.9967
8.175	48.5124
8.2	48.9589
8.225	48.8522
8.25	49.0477
8.275	49.5306
8.3	49.4797
8.325	48.8089
8.35	48.972
8.375	48.7382
8.4	48.4011
8.425	47.6822
8.45	47.1137
8.475	46.9935
8.5	46.9673
8.525	46.4558
8.55	46.2244
8.575	46.0523
8.6	45.9371
8.625	46.2196
8.65	46.5303
8.675	45.8346
8.7	46.1611
8.725	45.7818
8.75	45.8856
8.775	45.8204
8.8	45.6157
8.825	45.729
8.85	45.782
8.875	45.3096
8.9	45.4677
8.925	45.3128
8.95	44.8778
8.975	44.9597
9	44.607
9.025	44.8276
9.05	44.7413
9.075	44.1078
9.1	43.94
9.125	44.1041
9.15	44.5369
9.175	44.2446
9.2	44.0544
9.225	43.3867
9.25	43.879
9.275	43.6444
9.3	42.9924
9.325	42.8797
9.35	42.5525
9.375	43.0223
9.4	42.9312
9.425	43.4282
9.45	42.7134
9.475	42.8188
9.5	42.6038
9.525	42.8264
9.55	42.9525
9.575	43.1434
9.6	43.073
9.625	43.1089
9.65	42.3578
9.675	42.4643
9.7	42.1025
9.725	42.1244
9.75	41.9892
9.775	41.7814
9.8	42.6896
9.825	42.3743
9.85	41.9965
9.875	41.7848
9.9	41.6733
9.925	41.321
9.95	41.0205
9.975	40.6521
10	41.9473
10.025	41.1178
10.05	41.1458
10.075	40.9609
10.1	41.3889
10.125	41.0923
10.15	41.0292
10.175	40.9749
10.2	41.5404
10.225	41.2292
10.25	40.7328
10.275	40.6278
10.3	40.9005
10.325	40.0506
10.35	40.1117
10.375	40.4052
10.4	40.499
10.425	40.462
10.45	40.169
10.475	39.8949
10.5	40.6673
10.525	41.1965
10.55	39.883
10.575	40.1542
10.6	39.8451
10.625	39.3367
10.65	39.8349
10.675	39.6495
10.7	39.1279
10.725	39.1015
10.75	39.1566
10.775	38.6466
10.8	38.711
10.825	38.7579
10.85	38.8432
10.875	38.4745
10.9	38.476
10.925	38.7001
10.95	39.2949
10.975	38.6706
11	38.992
11.025	38.5535
11.05	39.1218
11.075	39.0659
11.1	38.9791
11.125	38.8213
11.15	38.9579
11.175	38.3424
11.2	38.2954
11.225	38.6915
11.25	38.834
11.275	38.8657
11.3	38.053
11.325	38.5192
11.35	38.531
11.375	38.5876
11.4	39.1209
11.425	38.5208
11.45	38.989
11.475	39.3657
11.5	40.11
11.525	40.3047
11.55	40.3725
11.575	40.0235
11.6	39.9901
11.625	39.4781
11.65	40.0629
11.675	40.0312
11.7	39.2381
11.725	38.7409
11.75	38.8464
11.775	38.6331
11.8	38.8109
11.825	38.5766
11.85	38.2384
11.875	38.1844
11.9	38.1564
11.925	38.4056
11.95	38.5586
11.975	38.4191
12	38.5818
12.025	37.8453
12.05	38.0394
12.075	38.212
12.1	38.6403
12.125	37.9512
12.15	38.1825
12.175	38.1783
12.2	38.3268
12.225	38.1821
12.25	38.0921
12.275	37.6675
12.3	37.9543
12.325	37.9343
12.35	38.4257
12.375	37.682
12.4	38.9286
12.425	37.8263
12.45	38.6759
12.475	38.3185
12.5	38.9301
12.525	39.2966
12.55	38.9596
12.575	38.7918
12.6	39.1369
12.625	39.1775
12.65	38.7115
12.675	38.4468
12.7	38.5294
12.725	38.427
12.75	38.35
12.775	38.6693
12.8	38.3826
12.825	38.4967
12.85	38.63
12.875	38.4628
12.9	38.2802
12.925	38.6874
12.95	38.5949
12.975	38.0448
13	38.8006
13.025	38.9369
13.05	39.2913
13.075	38.3294
13.1	38.8933
13.125	38.8604
13.15	38.6015
13.175	38.6067
13.2	38.5595
13.225	38.2667
13.25	38.2116
13.275	38.3018
13.3	38.0029
13.325	38.353
13.35	38.0993
13.375	37.8929
13.4	37.3892
13.425	37.821
13.45	38.2146
13.475	38.1601
13.5	38.3155
13.525	38.669
13.55	38.2827
13.575	38.1347
13.6	38.1668
13.625	38.2994
13.65	37.9316
13.675	38.2661
13.7	37.8875
13.725	37.0562
13.75	36.9103
13.775	37.0059
13.8	36.5638
13.825	36.9673
13.85	36.8006
13.875	36.5471
13.9	36.7971
13.925	36.4291
13.95	36.9832
13.975	36.8916
14	36.5295
14.025	37.0792
14.05	37.0437
14.075	36.5963
14.1	36.7466
14.125	37.0405
14.15	36.7271
14.175	36.614
14.2	36.3411
14.225	36.9096
14.25	36.5013
14.275	36.8967
14.3	36.4312
14.325	36.3873
14.35	36.4789
14.375	36.4529
14.4	36.7901
14.425	36.1454
14.45	36.5096
14.475	36.4637
14.5	36.6818
14.525	36.3806
14.55	36.6088
14.575	35.9368
14.6	35.8693
14.625	35.9279
14.65	35.7053
14.675	35.9295
14.7	35.5943
14.725	35.991
14.75	35.6169
14.775	35.2483
14.8	35.3619
14.825	34.844
14.85	35.2418
14.875	35.3077
14.9	35.6538
14.925	35.8837
14.95	36.0691
14.975	35.8492
15	35.8399
15.025	36.2571
15.05	36.2865
15.075	35.2037
15.1	35.5608
15.125	35.6259
15.15	35.1634
15.175	35.446
15.2	35.435
15.225	35.8981
15.25	36.0348
15.275	35.9063
15.3	35.6684
15.325	35.6072
15.35	35.7564
15.375	35.6087
15.4	35.3291
15.425	35.6543
15.45	35.4581
15.475	35.1317
15.5	35.7031
15.525	35.5455
15.55	36.5281
15.575	35.9635
15.6	36.052
15.625	36.168
15.65	35.7985
15.675	35.8763
15.7	35.6793
15.725	35.7757
15.75	35.7181
15.775	36.6481
15.8	35.6279
15.825	36.0992
15.85	36.379
15.875	36.0102
15.9	35.8828
15.925	35.6541
15.95	36.048
15.975	36.0205
16	35.8752
16.025	35.9174
16.05	36.6282
16.075	37.2978
16.1	37.0876
16.125	36.8097
16.15	36.1011
16.175	36.5595
16.2	36.8035
16.225	36.5523
16.25	36.4414
16.275	36.8722
16.3	36.6204
16.325	36.6757
16.35	36.7822
16.375	36.6225
16.4	37.1361
16.425	37.3785
16.45	37.3752
16.475	37.0775
16.5	37.1668
16.525	37.4919
16.55	37.6564
16.575	37.2673
16.6	37.4662
16.625	37.5798
16.65	37.5451
16.675	37.8172
16.7	38.0486
16.725	37.5993
16.75	36.9325
16.775	37.0381
16.8	37.1511
16.825	36.4826
16.85	36.2625
16.875	36.3798
16.9	35.6923
16.925	35.5903
16.95	35.871
16.975	34.9036
17	35.5931
17.025	35.3128
17.05	35.148
17.075	36.4563
17.1	36.1561
17.125	36.4311
17.15	36.63
17.175	36.106
17.2	36.336
17.225	36.1472
17.25	36.293
17.275	36.0754
17.3	36.0511
17.325	36.3314
17.35	36.8608
17.375	35.9881
17.4	35.6837
17.425	35.8215
17.45	36.0666
17.475	36.3594
17.5	36.4752
17.525	36.3143
17.55	36.415
17.575	35.8001
17.6	36.1241
17.625	35.948
17.65	36.9022
17.675	36.0509
17.7	36.5884
17.725	35.5828
17.75	36.5101
17.775	37.0691
17.8	36.4887
17.825	36.7008
17.85	36.5217
17.875	36.2842
17.9	36.6989
17.925	36.3571
17.95	36.4918
17.975	36.9761
18	36.2929
18.025	36.4129
18.05	36.4412
18.075	35.789
18.1	36.4438
18.125	36.588
18.15	36.33
18.175	35.8048
18.2	35.7219
18.225	35.8682
18.25	36.2733
18.275	35.6443
18.3	35.8845
18.325	35.6221
18.35	36.2143
18.375	35.7648
18.4	36.1731
18.425	36.3681
18.45	36.1723
18.475	35.9027
18.5	35.9657
18.525	35.9747
18.55	35.9405
18.575	35.9392
18.6	35.8324
18.625	36.1857
18.65	35.8404
18.675	36.1432
18.7	36.4988
18.725	36.4269
18.75	36.4456
18.775	36.6337
18.8	36.4632
18.825	36.2367
18.85	36.6017
18.875	36.6063
18.9	36.5573
18.925	35.9037
18.95	36.0768
18.975	35.7259
19	36.4182
19.025	36.0291
19.05	36.1003
19.075	36.5395
19.1	36.3017
19.125	36.4208
19.15	36.6469
19.175	35.565
19.2	35.9097
19.225	36.028
19.25	36.3029
19.275	35.7731
19.3	35.7518
19.325	35.7561
19.35	36.4053
19.375	35.6055
19.4	36.3446
19.425	35.9813
19.45	35.9957
19.475	36.3308
19.5	36.3662
19.525	35.5673
19.55	35.9709
19.575	36.2183
19.6	36.0955
19.625	36.1259
19.65	36.492
19.675	36.2584
19.7	36.4219
19.725	36.1632
19.75	36.0413
19.775	36.4392
19.8	36.8164
19.825	36.6779
19.85	36.6501
19.875	36.4777
19.9	35.8166
19.925	36.3285
19.95	36.2675
19.975	36.3632
20	36.4391
20.025	35.9591
20.05	36.0459
20.075	35.9294
20.1	36.1432
20.125	36.0487
20.15	36.2806
20.175	36.1214
20.2	35.404
20.225	36.1526
20.25	36.0308
20.275	36.0023
20.3	36.0637
20.325	36.1103
20.35	36.4406
20.375	36.5624
20.4	36.6786
20.425	36.3188
20.45	35.7458
20.475	36.2398
20.5	36.5406
20.525	35.9985
20.55	35.8256
20.575	36.263
20.6	36.137
20.625	36.1169
20.65	36.8219
20.675	37.0566
20.7	37.0302
20.725	37.1446
20.75	37.04
20.775	37.0118
20.8	36.9756
20.825	36.2476
20.85	36.775
20.875	36.5922
20.9	36.2117
20.925	36.1624
20.95	35.8335
20.975	36.3041
21	35.4807
21.025	36.1192
21.05	36.4613
21.075	36.5647
21.1	36.2513
21.125	36.3718
21.15	36.5576
21.175	36.5443
21.2	36.2616
21.225	36.7107
21.25	36.5953
21.275	36.5852
21.3	37.0185
21.325	36.3569
21.35	36.7703
21.375	36.4888
21.4	36.2611
21.425	35.7643
21.45	36.2681
21.475	36.0692
21.5	36.1826
21.525	36.4214
21.55	36.8282
21.575	36.1642
21.6	35.6242
21.625	36.0318
21.65	36.1908
21.675	36.1453
21.7	36.3728
21.725	36.7867
21.75	36.6336
21.775	36.1117
21.8	36.4898
21.825	36.6936
21.85	36.2669
21.875	37.0388
21.9	36.7654
21.925	36.756
21.95	36.2882
21.975	36.4698
22	35.9404
22.025	35.686
22.05	35.9642
22.075	36.2126
22.1	35.948
22.125	35.9008
22.15	36.4122
22.175	35.9648
22.2	35.7721
22.225	35.7943
22.25	35.7092
22.275	35.7763
22.3	35.6635
22.325	35.335
22.35	35.3761
22.375	35.2074
22.4	35.2457
22.425	36.021
22.45	35.9515
22.475	36.2647
22.5	35.6165
22.525	35.6726
22.55	35.9361
22.575	35.7962
22.6	35.7285
22.625	35.6045
22.65	35.622
22.675	35.6786
22.7	35.4609
22.725	35.6842
22.75	35.7847
22.775	35.3538
22.8	35.1261
22.825	35.7493
22.85	35.4324
22.875	35.1082
22.9	35.4385
22.925	35.7361
22.95	35.6371
22.975	36.2804
23	35.6082
23.025	36.4058
23.05	35.942
23.075	36.2023
23.1	36.4898
23.125	36.327
23.15	36.245
23.175	36.6888
23.2	35.9479
23.225	36.5759
23.25	36.3959
23.275	36.1992
23.3	36.5806
23.325	36.2483
23.35	36.0186
23.375	36.0468
23.4	36.1051
23.425	35.9554
23.45	36.35
23.475	36.3165
23.5	35.902
23.525	35.5193
23.55	35.3701
23.575	35.9115
23.6	35.7652
23.625	35.6941
23.65	35.6643
23.675	35.5548
23.7	35.2493
23.725	35.2104
23.75	35.7352
23.775	35.4624
23.8	35.5591
23.825	35.2145
23.85	35.519
23.875	36.1524
23.9	35.5795
23.925	35.5389
23.95	35.2576
23.975	35.7601
24	35.921
24.025	35.4596
24.05	35.2358
24.075	35.6205
24.1	35.6121
24.125	35.559
24.15	35.6872
24.175	35.8301
24.2	36.0632
24.225	35.5586
24.25	35.4928
24.275	34.8832
24.3	34.9876
24.325	34.3112
24.35	34.5519
24.375	34.2563
24.4	34.3794
24.425	34.9004
24.45	34.2345
24.475	34.3495
24.5	34.2611
24.525	33.9399
24.55	33.8974
24.575	34.4249
24.6	34.1401
24.625	34.415
24.65	34.0438
24.675	34.7557
24.7	35.014
24.725	33.8765
24.75	34.5022
24.775	35.3776
24.8	35.1391
24.825	35.0933
24.85	34.4628
24.875	34.6283
24.9	34.7589
24.925	35.0021
24.95	35.0653
24.975	35.2715
25	35.6432
25.025	35.6287
25.05	35.2037
25.075	35.4061
25.1	35.3991
25.125	34.9627
25.15	35.1479
25.175	35.1223
25.2	35.6323
25.225	34.9972
25.25	34.658
25.275	35.2492
25.3	34.9796
25.325	34.7445
25.35	35.3128
25.375	35.1558
25.4	35.947
25.425	36.1587
25.45	36.682
25.475	37.0704
25.5	36.7655
25.525	37.3311
25.55	36.7295
25.575	36.7748
25.6	36.4918
25.625	36.4658
25.65	36.5778
25.675	36.3351
25.7	36.6195
25.725	36.5526
25.75	36.1941
25.775	35.7386
25.8	35.7782
25.825	35.9207
25.85	36.128
25.875	34.7245
25.9	35.642
25.925	35.2977
25.95	35.4559
25.975	35.5245
26	35.3962
26.025	35.3319
26.05	34.4834
26.075	35.1444
26.1	34.8809
26.125	34.6848
26.15	35.4432
26.175	35.8201
26.2	35.1947
26.225	35.5934
26.25	35.8693
26.275	35.1641
26.3	35.5828
26.325	35.3392
26.35	35.0646
26.375	35.1462
26.4	34.6709
26.425	35.0716
26.45	35.5719
26.475	35.6671
26.5	34.9922
26.525	35.5838
26.55	34.857
26.575	35.092
26.6	34.5257
26.625	34.5701
26.65	34.8626
26.675	34.5976
26.7	34.3967
26.725	34.1829
26.75	34.0009
26.775	34.0892
26.8	34.4063
26.825	34.131
26.85	34.0173
26.875	34.0946
26.9	34.472
26.925	35.0359
26.95	34.3717
26.975	34.573
27	34.1271
27.025	34.6671
27.05	35.0373
27.075	35.0084
27.1	34.7943
27.125	34.4542
27.15	34.1347
27.175	34.3323
27.2	34.4953
27.225	34.0125
27.25	33.8758
27.275	34.5286
27.3	34.6163
27.325	34.5148
27.35	34.3884
27.375	34.954
27.4	34.3932
27.425	34.3948
27.45	34.25
27.475	34.3484
27.5	34.6875
27.525	34.4278
27.55	34.6825
27.575	34.833
27.6	34.4575
27.625	34.6974
27.65	35.1562
27.675	34.6794
27.7	34.4761
27.725	34.8086
27.75	35.0724
27.775	35.0234
27.8	34.8673
27.825	34.9934
27.85	34.5973
27.875	34.5523
27.9	35.1062
27.925	34.5001
27.95	34.4016
27.975	34.2502
28	34.5778
28.025	34.546
28.05	34.749
28.075	34.1569
28.1	34.708
28.125	34.4346
28.15	34.4232
28.175	34.4698
28.2	34.3484
28.225	35.1524
28.25	35.0676
28.275	35.3199
28.3	35.4875
28.325	35.2461
28.35	35.1637
28.375	34.9876
28.4	34.9481
28.425	34.755
28.45	34.9896
28.475	34.9151
28.5	34.6621
28.525	34.2974
28.55	34.1218
28.575	34.1443
28.6	33.9306
28.625	33.7596
28.65	33.8375
28.675	33.8524
28.7	34.2977
28.725	34.4719
28.75	34.2736
28.775	34.0891
28.8	34.0767
28.825	34.0053
28.85	34.4219
28.875	34.3359
28.9	34.0866
28.925	34.5563
28.95	34.2032
28.975	34.0907
29	34.2642
29.025	34.8186
29.05	34.2948
29.075	35.1983
29.1	35.2867
29.125	35.6701
29.15	35.5947
29.175	35.339
29.2	35.4085
29.225	36.0013
29.25	35.3395
29.275	36.1434
29.3	35.9074
29.325	35.6022
29.35	35.5
29.375	35.6358
29.4	36.2884
29.425	36.9173
29.45	37.2737
29.475	36.6963
29.5	36.9156
29.525	36.8994
29.55	36.2
29.575	36.5119
29.6	36.1041
29.625	36.0738
29.65	36.1542
29.675	36.0605
29.7	35.8541
29.725	35.4552
29.75	35.4992
29.775	35.1539
29.8	34.935
29.825	35.4138
29.85	35.4009
29.875	35.0496
29.9	35.3429
29.925	34.9815
29.95	35.2767
29.975	34.9829
30	35.6205
30.025	35.5201
30.05	35.5457
30.075	34.5751
30.1	34.3786
30.125	34.9433
30.15	34.6333
30.175	34.7385
30.2	35.0235
30.225	35.0552
30.25	34.7108
30.275	34.8121
30.3	34.5548
30.325	34.223
30.35	34.6568
30.375	35.0907
30.4	34.9764
30.425	34.7102
30.45	35.2508
30.475	34.7778
30.5	34.4903
30.525	34.3819
30.55	34.549
30.575	34.7411
30.6	35.0546
30.625	35.2391
30.65	35.3346
30.675	35.4176
30.7	35.2598
30.725	35.105
30.75	35.4368
30.775	34.9728
30.8	35.4319
30.825	35.784
30.85	35.8558
30.875	36.6414
30.9	35.8394
30.925	35.7125
30.95	35.6996
30.975	35.8148
31	35.3868
31.025	35.0972
31.05	34.7103
31.075	34.3675
31.1	34.4464
31.125	34.177
31.15	34.0002
31.175	34.4996
31.2	33.9759
31.225	34.1827
31.25	34.1138
31.275	33.7927
31.3	34.2985
31.325	34.556
31.35	34.323
31.375	33.9461
31.4	33.9111
31.425	33.7425
31.45	33.9455
31.475	34.0893
31.5	34.2921
31.525	33.9641
31.55	34.214
31.575	34.1901
31.6	34.366
31.625	34.7535
31.65	35.0323
31.675	34.7298
31.7	35.4704
31.725	34.7288
31.75	35.2706
31.775	34.7118
31.8	34.5162
31.825	34.8488
31.85	35.1249
31.875	34.995
31.9	35.1641
31.925	35.3782
31.95	34.956
31.975	34.3352
32	34.717
32.025	34.7529
32.05	35.1638
32.075	35.3001
32.1	34.5902
32.125	34.8566
32.15	35.0405
32.175	35.0794
32.2	34.7763
32.225	34.9302
32.25	34.6475
32.275	35.0554
32.3	35.2634
32.325	34.8655
32.35	35.1924
32.375	34.9433
32.4	34.734
32.425	35.0725
32.45	34.8271
32.475	35.1726
32.5	34.861
32.525	35.7819
32.55	35.5129
32.575	35.7009
32.6	35.3041
32.625	35.5569
32.65	36.0982
32.675	35.4069
32.7	35.6122
32.725	35.7731
32.75	35.25
32.775	35.9012
32.8	35.3655
32.825	35.0841
32.85	35.1895
32.875	34.7242
32.9	34.5293
32.925	34.9483
32.95	35.3859
32.975	35.1688
33	34.7289
33.025	34.8479
33.05	35.2145
33.075	34.9271
33.1	35.0958
33.125	35.4758
33.15	35.6539
33.175	35.7516
33.2	35.3148
33.225	35.4103
33.25	35.17
33.275	36.2159
33.3	36.0331
33.325	35.7924
33.35	35.583
33.375	35.4058
33.4	35.7405
33.425	35.5965
33.45	36.2494
33.475	36.0268
33.5	35.5691
33.525	35.7264
33.55	36.0543
33.575	35.6272
33.6	35.663
33.625	35.1286
33.65	35.4215
33.675	35.6285
33.7	35.4945
33.725	34.8588
33.75	34.7229
33.775	35.3699
33.8	35.3179
33.825	35.1584
33.85	34.7054
33.875	34.5738
33.9	34.1988
33.925	34.3755
33.95	34.2407
33.975	34.3842
34	34.736
34.025	34.6115
34.05	35.0742
34.075	35.2226
34.1	35.3764
34.125	34.4811
34.15	34.6467
34.175	34.8418
34.2	34.948
34.225	34.9924
34.25	35.1739
34.275	35.0539
34.3	34.5281
34.325	34.8835
34.35	35.7099
34.375	35.808
34.4	35.9648
34.425	36.3964
34.45	36.4175
34.475	36.7643
34.5	36.9258
34.525	36.6413
34.55	37.0014
34.575	36.8696
34.6	36.3911
34.625	36.6378
34.65	37.1523
34.675	36.9786
34.7	37.0641
34.725	36.5331
34.75	36.6939
34.775	36.5078
34.8	35.8927
34.825	36.8934
34.85	36.9916
34.875	36.4985
34.9	36.7987
34.925	36.0097
34.95	36.5282
34.975	36.3212
35	36.2233
35.025	36.1215
35.05	36.271
35.075	36.2692
35.1	36.2293
35.125	35.6605
35.15	35.4378
35.175	34.9922
35.2	35.4496
35.225	35.4333
35.25	34.9655
35.275	35.1254
35.3	35.0996
35.325	35.36
35.35	35.7305
35.375	35.2966
35.4	35.0978
35.425	35.6717
35.45	35.2036
35.475	35.3675
35.5	35.0341
35.525	35.3754
35.55	35.1517
35.575	35.4442
35.6	35.7753
35.625	35.3846
35.65	34.7281
35.675	35.1996
35.7	34.3349
35.725	34.8064
35.75	34.704
35.775	34.5495
35.8	34.7733
35.825	34.643
35.85	34.9394
35.875	35.043
35.9	34.6473
35.925	34.1552
35.95	33.8649
35.975	34.2265
36	33.9626
36.025	34.113
36.05	34.1789
36.075	33.8242
36.1	34.2512
36.125	34.5625
36.15	34.3801
36.175	34.2456
36.2	34.2031
36.225	34.7064
36.25	35.114
36.275	35.2336
36.3	34.9442
36.325	34.8336
36.35	34.6504
36.375	34.3358
36.4	35.0507
36.425	34.8869
36.45	34.3587
36.475	34.4006
36.5	34.0564
36.525	34.3417
36.55	35.0371
36.575	34.7599
36.6	34.8597
36.625	35.2303
36.65	35.0043
36.675	35.5089
36.7	35.9841
36.725	35.2326
36.75	35.6992
36.775	36.0728
36.8	35.5662
36.825	35.5968
36.85	35.7891
36.875	35.7676
36.9	35.2801
36.925	36.2168
36.95	35.7775
36.975	36.4495
37	36.0618
37.025	36.185
37.05	35.983
37.075	36.214
37.1	36.1662
37.125	36.3826
37.15	36.6293
37.175	36.5766
37.2	36.2225
37.225	36.2278
37.25	36.2467
37.275	36.4256
37.3	36.1492
37.325	35.9662
37.35	36.071
37.375	36.3309
37.4	36.4822
37.425	36.5138
37.45	36.4667
37.475	36.2101
37.5	36.4186
37.525	36.2955
37.55	36.3007
37.575	36.302
37.6	36.4611
37.625	35.7862
37.65	35.8249
37.675	35.5575
37.7	36.2826
37.725	35.4548
37.75	36.0093
37.775	36.3457
37.8	35.9437
37.825	36.3569
37.85	36.4495
37.875	36.5366
37.9	35.9175
37.925	35.4043
37.95	35.5306
37.975	35.5069
38	35.6436
38.025	35.1271
38.05	35.565
38.075	34.4401
38.1	35.01
38.125	34.931
38.15	34.6366
38.175	34.7928
38.2	34.3172
38.225	34.8935
38.25	34.4101
38.275	34.6919
38.3	34.9082
38.325	34.8522
38.35	34.6932
38.375	35.2554
38.4	34.9088
38.425	35.3599
38.45	35.7141
38.475	35.0571
38.5	34.98
38.525	35.5819
38.55	34.9352
38.575	35.368
38.6	35.0903
38.625	34.2447
38.65	34.5783
38.675	34.5922
38.7	34.6985
38.725	34.7463
38.75	34.728
38.775	35.2847
38.8	35.7162
38.825	35.9059
38.85	35.4213
38.875	35.0791
38.9	35.3753
38.925	35.5169
38.95	35.613
38.975	35.5204
39	36.2017
39.025	35.9785
39.05	35.6265
39.075	35.3909
39.1	35.8697
39.125	35.5365
39.15	35.3095
39.175	35.5001
39.2	35.8006
39.225	35.8748
39.25	35.7442
39.275	35.6667
39.3	36.1556
39.325	36.0714
39.35	35.3929
39.375	35.565
39.4	35.5242
39.425	34.9857
39.45	35.6511
39.475	35.7887
39.5	36.2855
39.525	35.7989
39.55	36.2244
39.575	35.6373
39.6	36.3599
39.625	35.9521
39.65	35.7546
39.675	35.432
39.7	36.0829
39.725	35.8061
39.75	35.6368
39.775	35.4545
39.8	35.2909
39.825	35.9279
39.85	35.5903
39.875	35.3955
39.9	35.6263
39.925	35.3214
39.95	35.2863
39.975	35.3757
40	35.0932
40.025	35.3259
40.05	35.5753
40.075	35.7164
40.1	35.8521
40.125	35.5146
40.15	34.9512
40.175	34.9429
40.2	34.2705
40.225	34.3343
40.25	34.3704
40.275	34.3312
40.3	34.3906
40.325	34.1557
40.35	34.7368
40.375	34.8933
40.4	34.4362
40.425	33.8726
40.45	34.0368
40.475	34.2337
40.5	34.2963
40.525	33.9498
40.55	34.2365
40.575	34.8001
40.6	35.1953
40.625	35.3914
40.65	35.448
40.675	35.4068
40.7	35.3545
40.725	35.9483
40.75	36.0906
40.775	35.8441
40.8	35.7478
40.825	35.7353
40.85	35.9618
40.875	35.2328
40.9	35.804
40.925	35.565
40.95	35.2642
40.975	35.0132
41	35.1141
41.025	34.9483
41.05	35.4931
41.075	36.0524
41.1	35.7176
41.125	36.22
41.15	35.5662
41.175	35.8828
41.2	35.281
41.225	35.2125
41.25	35.5762
41.275	35.2732
41.3	35.4142
41.325	35.2009
41.35	35.5949
41.375	34.9878
41.4	35.5926
41.425	35.7134
41.45	35.5796
41.475	35.3778
41.5	35.6307
41.525	35.4907
41.55	35.6372
41.575	35.6688
41.6	35.6093
41.625	35.9443
41.65	35.912
41.675	35.6341
41.7	36.0177
41.725	36.2863
41.75	35.9484
41.775	35.8654
41.8	36.4979
41.825	36.1978
41.85	35.4184
41.875	36.4049
41.9	35.9609
41.925	36.3875
41.95	35.6026
41.975	36.6998
42	36.5399
42.025	36.9563
42.05	37.2449
42.075	37.3302
42.1	37.0711
42.125	37.0333
42.15	36.1328
42.175	36.2231
42.2	36.3013
42.225	36.3916
42.25	36.2417
42.275	36.7249
42.3	36.7811
42.325	36.5645
42.35	36.4573
42.375	36.5859
42.4	36.2697
42.425	36.5833
42.45	36.6073
42.475	37.3206
42.5	36.8469
42.525	36.822
42.55	36.9003
42.575	37.0323
42.6	37.6336
42.625	37.6736
42.65	36.9882
42.675	37.5673
42.7	37.8985
42.725	37.8171
42.75	37.2825
42.775	37.1817
42.8	37.2034
42.825	37.8444
42.85	36.8251
42.875	36.7102
42.9	36.3652
42.925	36.0169
42.95	35.9174
42.975	36.4437
43	36.3942
43.025	36.2192
43.05	36.0531
43.075	36.4134
43.1	36.0432
43.125	36.2389
43.15	35.713
43.175	36.3543
43.2	36.1791
43.225	36.5437
43.25	36.0712
43.275	35.626
43.3	35.5841
43.325	35.0605
43.35	35.1947
43.375	35.2137
43.4	35.5311
43.425	35.4417
43.45	35.3932
43.475	34.9178
43.5	35.2693
43.525	34.8939
43.55	34.8701
43.575	34.8001
43.6	34.8802
43.625	35.0518
43.65	34.8275
43.675	35.0212
43.7	35.2871
43.725	34.4436
43.75	34.6038
43.775	35.3106
43.8	34.4882
43.825	35.1326
43.85	35.4371
43.875	34.8603
43.9	34.7788
43.925	34.6107
43.95	34.9142
43.975	35.2795
44	34.9973
44.025	35.7258
44.05	35.5978
44.075	34.1461
44.1	34.8844
44.125	34.827
44.15	34.9336
44.175	35.9616
44.2	35.5454
44.225	34.9695
44.25	35.2862
44.275	35.1633
44.3	34.8553
44.325	35.3725
44.35	34.709
44.375	35.3437
44.4	35.6084
44.425	35.342
44.45	35.3046
44.475	35.0642
44.5	34.717
44.525	35.118
44.55	34.5631
44.575	34.6512
44.6	35.3944
44.625	34.8069
44.65	35.3482
44.675	35.9944
44.7	35.203
44.725	35.3723
44.75	35.4568
44.775	35.1251
44.8	36.2266
44.825	35.9038
44.85	35.7689
44.875	36.0547
44.9	35.8628
44.925	36.0474
44.95	36.1345
44.975	36.3464
45	36.1679
45.025	36.7088
45.05	36.7618
45.075	36.4546
45.1	36.8011
45.125	36.6173
45.15	37.2515
45.175	36.3271
45.2	36.4124
45.225	36.1476
45.25	36.4455
45.275	36.3652
45.3	36.0128
45.325	35.341
45.35	34.9517
45.375	35.1052
45.4	35.3873
45.425	35.5676
45.45	35.6764
45.475	35.5827
45.5	35.1653
45.525	34.6839
45.55	35.1453
45.575	34.9351
45.6	35.2101
45.625	34.9602
45.65	35.1167
45.675	35.0657
45.7	35.3832
45.725	35.2129
45.75	35.307
45.775	34.5415
45.8	34.6358
45.825	34.5713
45.85	34.6358
45.875	34.7999
45.9	34.5333
45.925	34.7147
45.95	34.6202
45.975	34.9644
46	34.9781
46.025	35.3016
46.05	35.3175
46.075	35.1165
46.1	34.7272
46.125	34.9583
46.15	35.4567
46.175	35.0342
46.2	36.0821
46.225	35.691
46.25	35.9168
46.275	35.601
46.3	35.7338
46.325	35.9208
46.35	36.5236
46.375	36.4231
46.4	36.7242
46.425	36.2934
46.45	36.1542
46.475	35.5228
46.5	36.1533
46.525	36.2351
46.55	36.4055
46.575	36.5246
46.6	36.7036
46.625	37.0792
46.65	37.0858
46.675	36.5196
46.7	37.1769
46.725	36.9352
46.75	37.2443
46.775	36.3984
46.8	36.5807
46.825	36.3304
46.85	36.3213
46.875	35.2299
46.9	35.7243
46.925	36.1988
46.95	35.8651
46.975	35.5745
47	35.7148
47.025	35.9405
47.05	35.8113
47.075	36.1256
47.1	35.9466
47.125	35.5135
47.15	35.6667
47.175	35.9011
47.2	35.6813
47.225	35.5992
47.25	36.0543
47.275	36.4487
47.3	36.3747
47.325	37.3433
47.35	36.7587
47.375	36.4853
47.4	36.5127
47.425	36.635
47.45	37.1696
47.475	37.3622
47.5	37.6341
47.525	37.3723
47.55	38.231
47.575	37.8445
47.6	38.1402
47.625	37.7872
47.65	38.7323
47.675	40.023
47.7	43.5901
47.725	46.6336
47.75	48.9643
47.775	50.9772
47.8	52.6035
47.825	52.4925
47.85	52.2771
47.875	53.119
47.9	56.5084
47.925	58.9989
47.95	61.3964
47.975	62.3823
48	64.3615
48.025	67.2646
48.05	69.2569
48.075	69.9734
48.1	70.6405
48.125	71.5755
48.15	72.4709
48.175	73.2131
48.2	73.7461
48.225	74.4368
48.25	74.0143
48.275	73.6705
48.3	74.7466
48.325	75.2117
48.35	76.2934
48.375	75.9259
48.4	76.9009
48.425	77.0189
48.45	76.7567
48.475	76.8496
48.5	76.2492
48.525	75.6755
48.55	76.2931
48.575	76.1245
48.6	76.8267
48.625	76.9259
48.65	76.5029
48.675	76.5042
48.7	76.1434
48.725	76.0156
48.75	76.2574
48.775	77.0043
48.8	77.1748
48.825	76.5577
48.85	77.5285
48.875	77.6759
48.9	78.0029
48.925	77.9417
48.95	77.8768
48.975	78.4281
49	78.1989
49.025	78.7776
49.05	78.4117
49.075	78.0341
49.1	77.1615
49.125	76.4219
49.15	75.7233
49.175	75.4349
49.2	74.8617
49.225	74.393
49.25	74.0757
49.275	73.654
49.3	73.0085
49.325	72.7549
49.35	72.6958
49.375	72.0036
49.4	71.9186
49.425	71.5573
49.45	71.4144
49.475	70.8359
49.5	70.6873
49.525	69.9499
49.55	70.1323
49.575	69.5994
49.6	69.0428
49.625	69.0933
49.65	69.3535
49.675	68.6951
49.7	68.9306
49.725	68.3863
49.75	68.114
49.775	67.7758
49.8	68.0104
49.825	67.8718
49.85	67.6452
49.875	67.7172
49.9	67.0561
49.925	67.0628
49.95	67.2037
[truncated: 4,876 more rows]
