# Supplementary material for: Caveolin-1 protects endothelial cells from extensive expansion of transcellular tunnel by stiffening the plasma membrane
Source: eLife. 2024 Mar 22;12:RP92078. doi: 10.7554/eLife.92078 (PMC10959525; doi:10.7554/eLife.92078)
Supplement: Figure 6—source data 1. [file elife-92078-fig6-data1.xlsx]

## Sheet: Figure 6D
Crt	sqrt(sigma in N/m)	sigma (N/m)	force N*10^(-10)	force (pN)	force rescaled (f-f0)	(f-f0)²/8pi² (in kT.m/N)		si Cav1	sqrt(sigma in N/m)	sigma (N/m)	force N*10^(-10)	force (pN)	force rescaled (f-f0)	(f-f0)²/8pi² (in kT.m/N)		sicavin/ptrf	sqrt(sigma in N/m)	sigma (N/m)	force N*10^(-10)	force (pN)	force rescaled (f-f0)	(f-f0)²/8pi² (in kT.m/N)
20220127	0.00270814	7.33405e-06	0.0559	5.59	6.7934	0.000142153		20220224	0.00309677	9.59e-06	0.0946	9.46	5.3321	8.75748e-05		20220207	0.00264053	6.97241e-06	0.1179	11.79	5.9092	0.000107557
	0.00518439	2.6878e-05	0.1131	11.31	12.5134	0.000482318			0.00399875	1.599e-05	0.1068	10.68	6.5521	0.000132234			0.0036334	1.32016e-05	0.1369	13.69	7.8092	0.000187843
	0.00744114	5.53706e-05	0.1378	13.78	14.9834	0.000691518			0.00473181	2.239e-05	0.1273	12.73	8.6021	0.000227925			0.004412	1.94658e-05	0.155	15.5	9.6192	0.00028501
	0.00928385	8.61898e-05	0.1708	17.08	18.2834	0.00102967			0.0053647	2.878e-05	0.1361	13.61	9.4821	0.000276944				0	0.1667	16.67	10.7892	0.00035856
	0.0103537	0.0001072	0.2085	20.85	22.0534	0.00149808			0.00619516	3.838e-05	0.1515	15.15	11.0221	0.000374207			0.00622374	3.87349e-05	0.1824	18.24	12.3592	0.000470504
	0.0121367	0.0001473	0.2606	26.06	27.2634	0.00228951			0.00715332	5.117e-05	0.1737	17.37	13.2421	0.000540128			0.00720203	5.18692e-05	0.2073	20.73	14.8492	0.000679186
	0.0136931	0.0001875	0.3037	30.37	31.5734	0.00307062			0.0079975	6.396e-05	0.1824	18.24	14.1121	0.000613431			0.00842615	7.1e-05	0.2348	23.48	17.5992	0.000954045
20220224	0.0036606	1.34e-05	0.1563	15.63	7.6712	0.000181263			0.00876071	7.675e-05	0.1887	18.87	14.7421	0.000669424			0.00950789	9.04e-05	0.2692	26.92	21.0392	0.00136346
	0.00517687	2.68e-05	0.2158	21.58	13.6212	0.000571496		20220316 ves7	0.00325576	1.06e-05	0.1072	10.72	7.7404	0.000184548		20220224	0.00232164	5.39e-06	0.1182	11.82	6.4833	0.000129472
	0.00634035	4.02e-05	0.2585	25.85	17.8912	0.000985966			0.00398748	1.59e-05	0.135	13.5	10.5204	0.000340916			0.00328329	1.078e-05	0.1595	15.95	10.6133	0.000346963
	0.00817924	6.69e-05	0.3292	32.92	24.9612	0.00191917			0.00460435	2.12e-05	0.1519	15.19	12.2104	0.000459243			0.00402119	1.617e-05	0.1733	17.33	11.9933	0.000443058
	0.0103489	0.0001071	0.3978	39.78	31.8212	0.003119			0.00563915	3.18e-05	0.1815	18.15	15.1704	0.000708887			0.00519134	2.695e-05	0.1965	19.65	14.3133	0.000631048
	0.0121326	0.0001472	0.4396	43.96	36.0012	0.00399224			0.00727942	5.299e-05	0.225	22.5	19.5204	0.00117371			0.00656658	4.312e-05	0.2315	23.15	17.8133	0.000977398
	0.0136894	0.0001874	0.4744	47.44	39.4812	0.00480135			0.00861336	7.419e-05	0.259	25.9	22.9204	0.00161818			0.0077	5.929e-05	0.2914	29.14	23.8033	0.00174525
	0.0150831	0.0002275	0.4973	49.73	41.7712	0.00537448			0.00976678	9.539e-05	0.2765	27.65	24.6704	0.00187471		20220302	0.00242074	5.86e-06	0.1598	15.98	8.9267	0.000245451
	0.0163615	0.0002677	0.5147	51.47	43.5112	0.00583156		20220316 ves4	0.00366198	1.34101e-05	0.0555	5.55	8.0772	0.000200958			0.00342199	1.171e-05	0.1998	19.98	12.9267	0.000514705
	0.0175471	0.0003079	0.5641	56.41	48.4512	0.00723089			0.00517883	2.68202e-05	0.0714	7.14	9.6672	0.000287862			0.00419166	1.757e-05	0.2337	23.37	16.3167	0.000820063
20220302	0.00270185	7.3e-06	0.0878	8.78	8.3113	0.000212775			0.00738618	5.45556e-05	0.1285	12.85	15.3772	0.000728345			0.0054111	2.928e-05	0.2736	27.36	20.3067	0.00127017
	0.00382099	1.46e-05	0.1318	13.18	12.7113	0.000497694			0.00931414	8.67532e-05	0.1704	17.04	19.5672	0.00117934			0.00640234	4.099e-05	0.3115	31.15	24.0967	0.00178854
	0.0054037	2.92e-05	0.1721	17.21	16.7413	0.000863299			0.0112356	0.000126238	0.2031	20.31	22.8372	0.00160645		20220310 ves 10	0.00250998	6.3e-06	0.1098	10.98	3.6599	4.12592e-05
	0.0066106	4.37e-05	0.2152	21.52	21.0513	0.00136503		20220317 ves 17	0.00342637	1.174e-05	0.0517	5.17	9.4855	0.000277143			0.00354965	1.26e-05	0.1639	16.39	9.0699	0.000253389
	0.00809938	6.56e-05	0.2602	26.02	25.5513	0.00201098			0.00484562	2.348e-05	0.0915	9.15	13.4655	0.000558506			0.00434741	1.89e-05	0.1931	19.31	11.9899	0.000442806
	0.00935414	8.75e-05	0.2997	29.97	29.5013	0.0026808			0.00593464	3.522e-05	0.12	12	16.3155	0.000819943			0.00561249	3.15e-05	0.244	24.4	17.0799	0.000898573
	0.0104547	0.0001093	0.346	34.6	34.1313	0.0035883			0.00726774	5.282e-05	0.1636	16.36	20.6755	0.00131672			0.0070993	5.04e-05	0.287	28.7	21.3799	0.00140797
	0.0114543	0.0001312	0.3625	36.25	35.7813	0.00394362			0.00873499	7.63e-05	0.2054	20.54	24.8555	0.00190295			0.00904434	8.18e-05	0.3394	33.94	26.6199	0.00218271
20220310	0.00532447	2.835e-05	0.2088	20.88	25.1218	0.00194395			0.00998899	9.978e-05	0.2302	23.02	27.3355	0.00230164			0.0106442	0.0001133	0.3534	35.34	28.0199	0.00241833
	0.00614817	3.78e-05	0.2476	24.76	29.0018	0.00259079		20220322 ves1	0.0026	6.76e-06	0.0562	5.62	5.7783	0.000102845			0.0120333	0.0001448	0.3668	36.68	29.3599	0.00265517
	0.00687386	4.725e-05	0.2819	28.19	32.4318	0.00323985			0.0036756	1.351e-05	0.083	8.3	8.4583	0.000220368		20220310 ves 9	0.00407676	1.662e-05	0.1387	13.87	12.5829	0.00048769
20220316 VES10	0.00267155	7.13719e-06	0.0663	6.63	5.5968	9.64856e-05			0.00519904	2.703e-05	0.1167	11.67	11.8283	0.000430951			0.00526308	2.77e-05	0.1843	18.43	17.1429	0.000905214
	0.00447381	2.0015e-05	0.1058	10.58	9.5468	0.000280736			0.0063671	4.054e-05	0.1419	14.19	14.3483	0.000634138			0.00665733	4.432e-05	0.2244	22.44	21.1529	0.00137823
	0.00553737	3.06625e-05	0.1296	12.96	11.9268	0.000438158		20220322 ves5	0.00255147	6.51e-06	0.0734	7.34	6.3	0.000122254			0.00780641	6.094e-05	0.2694	26.94	25.6529	0.00202701
	0.00635216	4.035e-05	0.1414	14.14	13.1068	0.000529147			0.00360971	1.303e-05	0.1034	10.34	9.3	0.000266409			0.00880682	7.756e-05	0.2937	29.37	28.0829	0.00242922
	0.00720208	5.187e-05	0.1648	16.48	15.4468	0.000734953			0.00442041	1.954e-05	0.1264	12.64	11.6	0.000414475			0.00998599	9.972e-05	0.3278	32.78	31.4929	0.00305498
	0.00831685	6.917e-05	0.186	18.6	17.5668	0.000950535			0.00570701	3.257e-05	0.1539	15.39	14.35	0.000634288
20220316 VES12	0.00274773	7.55e-06	0.084	8.4	7.3575	0.000166741			0.00721873	5.211e-05	0.1942	19.42	18.38	0.00104058
	0.00388587	1.51e-05	0.1053	10.53	9.4875	0.000277259
	0.00549545	3.02e-05	0.1472	14.72	13.6775	0.00057623
	0.00673053	4.53e-05	0.1847	18.47	17.4275	0.00093552
20220317 ves8	0.00236854	5.61e-06	0.0574	5.74	7.3899	0.000168213
	0.00410366	1.684e-05	0.1247	12.47	14.1199	0.00061411
	0.00529811	2.807e-05	0.1659	16.59	18.2399	0.00102477
	0.00670149	4.491e-05	0.21	21	22.6499	0.00158021
20220317 ves9	0.00336452	1.132e-05	0.0931	9.31	11.6437	0.000417604
	0.00475815	2.264e-05	0.1616	16.16	18.4937	0.00105349
	0.00629444	3.962e-05	0.2024	20.24	22.5737	0.0015696
	0.0075233	5.66e-05	0.2425	24.25	26.5837	0.00217678
20220317 ves10	0.00250699	6.285e-06	0.0736	7.36	5.8248	0.000104507
	0.00431741	1.864e-05	0.1141	11.41	9.8748	0.000300358
	0.00610492	3.727e-05	0.1566	15.66	14.1248	0.000614536
20220322	0.00423084	1.79e-05	0.1034	10.34	10.1803	0.00031923
	0.00545894	2.98e-05	0.1575	15.75	15.5903	0.000748672
	0.00690652	4.77e-05	0.1861	18.61	18.4503	0.00104855
	0.00809321	6.55e-05	0.2227	22.27	22.1103	0.00150582
	0.00976217	9.53e-05	0.2541	25.41	25.2503	0.00196388
